# Supplementary material for: NanoPARE: parallel analysis of RNA 5′ ends from low-input RNA
Source: Genome Res. 2018 Dec;28(12):1931–42. doi: 10.1101/gr.239202.118 (PMC6280765; doi:10.1101/gr.239202.118)
Supplement: Supplemental Material [file supp_gr.239202.118_Supplemental_Data_S1.xlsx]

## Sheet: NGS Mapping Statistics
Supplemental Data S1. Summary of high-throughput sequencing datasets generated in or reanalyzed for this study
All samples were aligned to the TAIR10 genome using STAR
Sample	Publication	GEO Accession	Library Type	Genotype	Treatment	Sequenced Reads	Adapter Filtered Reads	Uniquely aligned reads	Multiply aligned reads (2-50x)	Percent Mapped
col0_fb_1	This study	GSM3090183	Smart-seq2	wild-type	none	26714548	26714513	19470168	5180722	0.922752
col0_fb_2	This study	GSM3090184	Smart-seq2	wild-type	none	24104566	24104440	15625718	5409166	0.872651
col0_fb_3	This study	GSM3090185	Smart-seq2	wild-type	none	24626064	24626058	17938039	4602063	0.915295
xrn4_fb_1	This study	GSM3090186	Smart-seq2	xrn4-5	none	26721209	26721155	22164063	2259100	0.913999
xrn4_fb_2	This study	GSM3090187	Smart-seq2	xrn4-5	none	26109347	26109326	21944278	1984834	0.916496
xrn4_fb_3	This study	GSM3090188	Smart-seq2	xrn4-5	none	25036264	25036247	21815678	1199180	0.919261
col0_fb_1	This study	GSM3090189	nanoPARE	wild-type	none	30379807	16854467	9267129	5676787	0.491903
col0_fb_2	This study	GSM3090190	nanoPARE	wild-type	none	29709165	22109506	14354870	6420306	0.699285
col0_fb_3	This study	GSM3090191	nanoPARE	wild-type	none	23991001	21275303	14597372	5758206	0.848467
xrn1_fb_1	This study	GSM3090192	nanoPARE	wild-type	Xrn1	21730330	12640341	9135778	3027992	0.55976
xrn1_fb_2	This study	GSM3090193	nanoPARE	wild-type	Xrn1	16215554	6660912	2548311	1887390	0.273546
xrn1_fb_3	This study	GSM3090194	nanoPARE	wild-type	Xrn1	18520215	11333850	7337825	3193490	0.568639
xrn4_fb_1	This study	GSM3090195	nanoPARE	xrn4-5	none	19873515	18090606	14325650	2395585	0.841383
xrn4_fb_2	This study	GSM3090196	nanoPARE	xrn4-5	none	13597615	12868211	10893748	1577642	0.917175
xrn4_fb_3	This study	GSM3090197	nanoPARE	xrn4-5	none	14818569	14299487	12875545	932049	0.931776
dcl234_fb_1	This study	GSM3090198	nanoPARE	dcl234	none	26566370	19838518	10613056	7487600	0.681337
dcl234_fb_2	This study	GSM3090199	nanoPARE	dcl234	none	26839854	19244923	6754476	7486503	0.530591
dcl234_fb_3	This study	GSM3090200	nanoPARE	dcl234	none	29151412	23754599	15822163	6799556	0.776008
col0_fb_10ug_1	This study	GSM3090201	nanoPARE	wild-type	none	38616713	35915961	32023984	3284936	0.914343
col0_fb_10ug_2	This study	GSM3090202	nanoPARE	wild-type	none	36061793	34341830	32105256	1694695	0.937279
col0_fb_10ug_3	This study	GSM3090203	nanoPARE	wild-type	none	36106438	33776567	30074673	3161540	0.920507
1ng_fb_1	This study	GSM3090204	nanoPARE	wild-type	none	17035328	15839472	9692325	5700553	0.903586
1ng_fb_2	This study	GSM3090205	nanoPARE	wild-type	none	18460552	15133248	8668016	5752858	0.781172
1ng_fb_3	This study	GSM3090206	nanoPARE	wild-type	none	14527617	12401732	7071263	4507319	0.797005
100pg_fb_1	This study	GSM3090207	nanoPARE	wild-type	none	13102034	10401374	5709067	3730197	0.720443
100pg_fb_2	This study	GSM3090208	nanoPARE	wild-type	none	16316488	12752403	6928374	4426995	0.695944
100pg_fb_3	This study	GSM3090209	nanoPARE	wild-type	none	14258904	8334041	4117257	2750253	0.48163
10pg_fb_1	This study	GSM3090210	nanoPARE	wild-type	none	16817248	10676471	4221741	2999839	0.429415
10pg_fb_2	This study	GSM3090211	nanoPARE	wild-type	none	15145831	10719936	4950161	3039843	0.527538
10pg_fb_3	This study	GSM3090212	nanoPARE	wild-type	none	20237653	12960345	5120298	3352324	0.418656
flower_1	This study	GSM3331512	nanoPARE	wild-type	none	15592499	12378805	9782016	2375658	0.779713
flower_2	This study	GSM3331513	nanoPARE	wild-type	none	22219257	16333663	11215836	4794448	0.720559
flower_3	This study	GSM3331514	nanoPARE	wild-type	none	18491643	14514651	11281516	2945492	0.769375
sepal_1	This study	GSM3331515	nanoPARE	wild-type	none	13493863	10707355	7535238	3026723	0.782723
sepal_2	This study	GSM3331516	nanoPARE	wild-type	none	17916256	15902538	11343872	4384142	0.877863
sepal_3	This study	GSM3331517	nanoPARE	wild-type	none	50001634	43655133	24953226	17711971	0.853276
petal_1	This study	GSM3331518	nanoPARE	wild-type	none	16159115	13116220	9423160	3449174	0.796599
petal_2	This study	GSM3331519	nanoPARE	wild-type	none	13663204	10969482	7809903	2948951	0.787433
petal_3	This study	GSM3331520	nanoPARE	wild-type	none	16237132	13330852	9736868	3312927	0.803701
anther_1	This study	GSM3331521	nanoPARE	wild-type	none	12336545	9939890	8186700	1576844	0.791433
anther_2	This study	GSM3331522	nanoPARE	wild-type	none	20189671	15404473	11862506	3239997	0.748031
anther_3	This study	GSM3331523	nanoPARE	wild-type	none	18850134	14803801	11254024	3242507	0.769041
stigma_1	This study	GSM3331524	nanoPARE	wild-type	none	12022360	8480089	5565677	2760651	0.69257
stigma_2	This study	GSM3331525	nanoPARE	wild-type	none	15327172	9812310	7317702	2362058	0.631542
stigma_3	This study	GSM3331526	nanoPARE	wild-type	none	10267091	7666462	6265928	1277758	0.734744
ovule_1	This study	GSM3331527	nanoPARE	wild-type	none	48272972	46641080	35783452	10354217	0.955766
ovule_2	This study	GSM3331528	nanoPARE	wild-type	none	10886215	8271915	5919053	2183036	0.744252
ovule_3	This study	GSM3331529	nanoPARE	wild-type	none	12295493	9243663	6485188	2581423	0.737393
addoquaye_1	Addo-Quaye 2008	GSM278333	degradome	wild-type	none	93670	93608	13193	1481	0.156656
addoquaye_2	Addo-Quaye 2008	GSM278334	degradome	wild-type	none	1371358	1358456	1111450	91819	0.877429
addoquaye_3	Addo-Quaye 2008	GSM278335	degradome	wild-type	none	7179831	7160170	3666017	2511410	0.860386
creasy_1	Creasy 2015	GSM1263708	PARE	wild-type	none	2225857	2217842	1597806	405904	0.900197
german_1	German 2008	GSM280226	PARE	wild-type	none	17711729	13435612	10773463	1891674	0.715071
german_2	German 2008	GSM280227	PARE	xrn4-5	none	10643828	10263197	7971357	1847914	0.922532
gregory_1	Gregory 2008	GSM284751	GMUCT	wild-type	none	24512233	17326203	1634819	54801	0.0689297
gregory_2	Gregory 2008	GSM284752	GMUCT	ein5-6	none	24765035	21333163	3845594	134914	0.160731
hou_1	Hou 2016	GSM2054359	PARE	wild-type	none	56603649	53472732	43038673	6199563	0.869877
hou_2	Hou 2016	GSM2253889	PARE	wild-type	none	36145833	35213912	29550288	5174056	0.960674
hou_3	Hou 2016	GSM2253892	PARE	wild-type	none	38938987	37654937	31192364	5873558	0.951897
willmann_1	Willmann 2014	GSM1145327	GMUCT2.0	wild-type	none	7786638	7740886	7053183	582251	0.980582
willmann_2	Willmann 2014	GSM1145328	GMUCT2.0	wild-type	none	9218454	9175740	8317971	722189	0.980659
yu_1	Yu 2016	GSM1939001	GMUCT2.0	wild-type	cycloheximide	25482593	25142097	23012507	1625369	0.966851
yu_2	Yu 2016	GSM1939002	GMUCT2.0	wild-type	cycloheximide	22673904	22297959	20501102	1334403	0.963024
