# Supplementary material for: NanoPARE: parallel analysis of RNA 5′ ends from low-input RNA
Source: Genome Res. 2018 Dec;28(12):1931–42. doi: 10.1101/gr.239202.118 (PMC6280765; doi:10.1101/gr.239202.118)
Supplement: Supplemental Material [file supp_gr.239202.118_Supplemental_Data_S2.xlsx]

## Sheet: Unified 5P Feature Set
Supplemental Data S2: 5' end features identified by EndGraph in floral bud RNA from Arabidopsis thaliana
Features were detected in at least 2 of 3 biological replicates of Col-0, Col-0+Xrn1, or xrn4-5 nanoPARE libraries from 5ng of total RNA										Feature abundance (reads per million)
chromosome	start	end	feature name	peak position	strand	associated gene ID (Araport11)	distance to gene	position	gene feature	col0_1	col0_2	col0_3	col0_xrn1_1	col0_xrn1_2	col0_xrn1_3	xrn4_1	xrn4_2	xrn4_3
chr1	3624	3708	chr1.capped.0	6	+	AT1G01010	0	proximal	UTR5	0.74	0.64	0.49	0.14	0	0.64	1.5	0.72	0.87
chr1	8620	8720	chr1.capped.1	99	-	AT1G01020	0	proximal	UTR5	3.46	4.76	5.52	5.32	3.2	3.5	8	5.11	5.33
chr1	11762	11778	chr1.noncapped.2	8	-	AT1G01030	0	distal	UTR3	0	0	0	0	0.32	0.19	1.76	0.55	0.24
chr1	11914	12038	chr1.noncapped.3	106	-	AT1G01030	0	distal	CDS	0.93	0.66	0.49	0	0.94	0.63	1.11	0.31	0.16
chr1	13412	13485	chr1.noncapped.4	66	-	AT1G01030	0	proximal	UTR5	0.62	0.58	0.31	0.42	1.28	1.23	1.37	1.33	1.18
chr1	13572	13714	chr1.capped.5	40	-	AT1G01030	0	proximal	UTR5	11.41	11.81	9.63	16.2	10.95	13.16	18.07	21.55	19.65
chr1	23080	23153	chr1.capped.6	54	+	AT1G01040	0	single-exon	UTR5	2.09	2.51	2.99	1.84	1.43	4.71	1.44	2.01	1.73
chr1	33048	33153	chr1.capped.7	65	-	AT1G01050	0	proximal	UTR5	55.1	60.34	65.06	66.79	48.1	92.84	158.83	158.19	198.7
chr1	37695	37888	chr1.capped.8	157	-	AT1G01060	0	proximal	UTR5	1.79	1.61	6.37	2.5	8.65	12.66	67.47	66.12	52.47
chr1	40935	40945	chr1.capped.9	8	-	AT1G01070	0	proximal	UTR5	1.47	0.46	2.18	0.35	2.75	2.36	2.99	2.4	3.44
chr1	45081	45116	chr1.noncapped.10	29	+	AT1G01080	0	antisense	UTR3	0	0.15	0.11	0.99	0.49	0.22	0.15	0.48	0.08
chr1	46721	46830	chr1.capped.11	104	-	AT1G01080	0	proximal	UTR5	24.08	19.72	14.32	29.7	25.54	19.79	44.33	36.59	37.89
chr1	49202	49289	chr1.capped.12	76	-	AT1G01090	0	proximal	UTR5	104.48	89.45	93.34	112.63	86.57	80.69	98.29	111.77	63.7
chr1	51005	51110	chr1.capped.13	89	-	AT1G01100	0	proximal	UTR5	0.91	2.18	1	0.98	0.71	0.42	1.2	2	1.57
chr1	51178	51199	chr1.capped.14	8	-	AT1G01100	0	proximal	UTR5	538.33	661.78	593.68	790.57	607.79	741.74	1417.08	1121.98	935.14
chr1	51996	52258	chr1.capped.15	213	+	AT1G01110	0	proximal	UTR5	5.68	3.17	3.26	7.41	5.79	5.67	2.97	4.04	7.59
chr1	52851	52884	chr1.capped.16	9	+	AT1G01110	-77	intron	CDS	0.25	0.35	0	0.99	0.49	0.48	0.51	0.57	0.47
chr1	59125	59129	chr1.capped.17	1	-	AT1G01120	0	single-exon	UTR5	7.78	7.8	10.01	9	8.07	12.27	48.23	58.93	32.79
chr1	63779	63914	chr1.capped.18	35	-	AT1G01130	-4	upstream	UTR5	8.91	9.26	9.62	10.17	12.96	9.79	14.47	12.24	13.21
chr1	63926	64134	chr1.capped.19	115	-	AT1G01130	-231	upstream	UTR5	2.14	2.13	2.52	2.83	5.35	3.05	2.09	4.18	3.16
chr1	67554	67628	chr1.capped.20	70	-	AT1G01140	0	proximal	UTR5	20.66	17.34	22.81	22.23	33.45	39.03	27.52	35.7	39.07
chr1	69887	70140	chr1.capped.21	103	+	AT1G01150	0	antisense	UTR3	2.72	4.34	9.35	8.24	7.43	18.95	15.75	16.68	11.49
chr1	72300	72431	chr1.capped.22	38	+	AT1G01160	0	single-exon	UTR5	20.62	19.25	16.62	27.56	16.48	24.65	24.97	28.17	35.03
chr1	72485	72542	chr1.capped.23	4	+	AT1G01160	0	single-exon	UTR5	4.5	4.21	4.37	5.66	2.92	10.37	4.4	5.69	5.54
chr1	74598	74660	chr1.capped.24	59	-	AT1G01170	-203	intron	UTR5	0.67	1.79	0.31	0.98	0	0.98	0.9	1.84	1.68
chr1	74716	74737	chr1.capped.25	14	-	AT1G01170	0	single-exon	UTR5	101.81	141.97	114.43	126.94	125.82	138.88	250.12	245.23	194.69
chr1	75415	75658	chr1.capped.26	169	+	AT1G01180	0	single-exon	UTR5	0.27	0.42	0.56	0.14	0.91	0.37	1.07	1.21	2.2
chr1	77739	77886	chr1.capped.27	81	+	.	.	intergenic	.	0.69	0.43	0.79	0.17	0.21	0.78	0.25	0.24	0.56
chr1	78851	78931	chr1.noncapped.28	79	-	ENSRNA049757528-T1	0	single-exon	NC	0.58	0.31	1.13	0.23	0	0	0.15	1.15	0.31
chr1	79114	79164	chr1.capped.29	46	-	AT1G01183	-124	upstream	NC	0.08	0.19	0.07	1.01	0.59	0	0.03	0.51	0
chr1	88097	88296	chr1.capped.30	116	-	AT1G01200	0	proximal	UTR5	1.2	0.55	0.68	1.68	1.87	0.48	2.06	2.81	1.97
chr1	88878	88977	chr1.capped.31	19	+	AT1G01210	0	proximal	UTR5	14.34	16.31	20.28	22.51	18.77	17.54	27.02	24.75	25.96
chr1	89095	89145	chr1.capped.32	5	+	AT1G01210	-72	intron	CDS	0.25	0.37	0.13	0.14	0	0.07	1.08	0.7	0.7
chr1	91362	91478	chr1.capped.33	25	+	AT1G01220	0	single-exon	UTR5	1.15	1.27	1.37	0.88	0.58	0.21	1.51	1.39	1.65
chr1	95823	96066	chr1.capped.34	192	+	AT1G01225	0	proximal	UTR5	4.48	2.89	4.24	7.46	7.88	6.49	5.33	6.57	10.11
chr1	97396	97538	chr1.capped.35	79	+	AT1G01230	0	proximal	UTR5	15.06	15.09	15.87	18.41	16.43	26.56	32.45	35.29	39.29
chr1	99862	100065	chr1.capped.36	62	+	AT1G01240	0	single-exon	UTR5	5.7	6.92	4.52	5.88	6.8	12.94	7.49	11.9	13.11
chr1	101532	101590	chr1.noncapped.37	24	+	AT1G01240	0	single-exon	CDS	0.07	0.25	0.21	0.85	1.06	0.57	0.07	0.57	0.62
chr1	105281	105347	chr1.capped.38	40	-	AT1G01250	0	single-exon	UTR5	33.76	24.58	17.54	39.76	25.24	26.4	25.61	25.15	20.98
chr1	108997	109200	chr1.capped.39	31	+	AT1G01260	0	single-exon	UTR5	4.43	4.16	3.87	6.25	2.97	3.02	8.52	6.63	12.56
chr1	112182	112282	chr1.capped.40	74	+	AT1G01280	-6	upstream	UTR5	0.48	1.84	2.1	0.68	1.14	1.04	2.03	6.32	2.02
chr1	114284	114323	chr1.capped.41	1	+	AT1G01290	0	proximal	UTR5	9.24	9.31	6.39	13.66	8.42	11.99	20.97	13.39	28.75
chr1	117028	117046	chr1.capped.42	5	+	AT1G01300	0	single-exon	UTR5	175.76	132.82	83.14	193.64	109.31	221.27	238.77	183.15	525.8
chr1	120132	120221	chr1.capped.43	8	+	AT1G01310	-13	upstream	UTR5	8.02	31	26.98	15.31	13.7	24.34	2.29	25.42	9.51
chr1	122469	122489	chr1.noncapped.44	7	-	AT1G01320	0	distal	CDS	0.04	0.22	0.45	0.62	0.72	0.83	0.07	0	0.63
chr1	128290	128344	chr1.capped.45	29	-	AT1G01320	-8	intron	CDS	0.58	0.98	0.52	0.52	0.93	0.54	0.15	0.43	1.09
chr1	130407	130423	chr1.capped.46	14	-	AT1G01320	0	proximal	UTR5	4.66	1.9	0.76	6.14	5.41	2.53	3.72	4.36	1.72
chr1	130474	130577	chr1.capped.47	26	-	AT1G01320	0	proximal	UTR5	83.66	86.72	45.94	140.34	106.96	99.86	69.3	67.76	24.19
chr1	135825	135914	chr1.capped.48	28	-	AT1G01340	0	proximal	UTR5	0.06	0.39	0.49	0	0.47	0.22	0.45	0.64	0.56
chr1	136123	136183	chr1.capped.49	33	+	AT1G01350	0	proximal	UTR5	8.98	9.21	10.23	17.1	13.11	18.06	21.94	19.19	19.17
chr1	141935	142128	chr1.capped.50	157	+	AT1G01360	0	proximal	UTR5	9.01	11.78	17.8	14.26	11.68	25.3	21.01	27.88	32.8
chr1	143527	143755	chr1.capped.51	36	+	AT1G01370	0	proximal	UTR5	5.91	8.72	7.39	9.68	5.9	9.12	16.19	11.88	13.44
chr1	152212	152277	chr1.capped.52	9	-	AT1G01400	-12	upstream	UTR5	0.06	0.11	0.56	0	0.21	0	0.65	1.28	0.55
chr1	158553	158739	chr1.capped.53	57	-	AT1G01430	0	proximal	UTR5	12.71	11.46	6.33	14.91	8.37	8.99	21.83	24.04	28.94
chr1	162632	162880	chr1.capped.54	84	-	AT1G01440	0	proximal	UTR5	1.73	1.02	1.71	2.54	2.07	3.15	3.45	5.06	3.91
chr1	163409	163420	chr1.capped.55	3	+	AT1G01448	0	proximal	NC	4.23	2.69	3.67	5.54	2.77	2.55	5.79	6.14	8.02
chr1	168551	168784	chr1.capped.56	163	+	AT1G01460	0	proximal	UTR5	1.77	9.28	3.1	1.75	2.58	7.62	0.61	6.12	0.87
chr1	172870	172945	chr1.capped.57	11	-	AT1G01470	0	proximal	UTR5	8.79	8.56	7.13	9.72	12.03	15.3	7.79	14.05	37.11
chr1	181472	181616	chr1.capped.58	132	-	AT1G01490	0	distal	CDS	1.55	1.88	3.23	2.27	3.05	2.18	0.11	2.18	1.18
chr1	182129	182369	chr1.capped.59	226	-	AT1G01490	0	proximal	UTR5	29.57	33.61	37.25	33.54	26.45	32.86	60.67	89.42	64.67
chr1	185028	185175	chr1.capped.60	108	+	AT1G01500	0	proximal	UTR5	7.5	11.27	9.6	6.9	5.76	16.82	6.35	17.3	12.9
chr1	187149	187252	chr1.capped.61	40	+	AT1G01510	0	proximal	UTR5	11.89	12.04	10.06	11.58	7.15	13.59	19.27	19.87	27.84
chr1	190538	190547	chr1.capped.62	1	+	AT1G01520	0	proximal	UTR5	0.77	0.61	2.32	0.92	0.61	3.84	13.03	20.07	16.98
chr1	195736	195868	chr1.capped.63	86	+	AT1G01540	0	proximal	UTR5	14.09	13.17	11.1	12.58	7.21	16.63	24.91	30.55	20.65
chr1	199624	199885	chr1.capped.64	92	+	AT1G01550	0	proximal	UTR5	33.66	37.16	44.61	52.83	31.96	57.83	98.16	107.51	155.43
chr1	202202	202331	chr1.capped.65	52	+	AT1G01560	0	proximal	UTR5	0.3	0.29	0.67	0.2	0.22	4.15	0.85	1.16	1.09
chr1	204910	205026	chr1.capped.66	34	+	AT1G01570	0	proximal	UTR5	3.55	1.72	1.13	3.82	3.87	1.34	3.18	3.77	3.81
chr1	205339	205369	chr1.noncapped.67	9	+	AT1G01570	0	proximal	CDS	0	0.1	0	0	0.44	0.75	0.17	0	0
chr1	209287	209297	chr1.noncapped.68	4	+	AT1G01580	0	proximal	CDS	0.14	0.21	0.41	0.64	0	2.61	0.37	1.43	0.39
chr1	214113	214180	chr1.capped.69	31	+	AT1G01590	-5	upstream	UTR5	0.95	0.49	0.43	0.14	0	1.11	0.9	2.87	3.5
chr1	215340	215435	chr1.capped.70	62	+	AT1G01590	0	distal	CDS	0.42	0.25	0.4	0.43	1.05	0.61	1.68	1.27	0.63
chr1	218939	219155	chr1.capped.71	193	+	AT1G01600	0	proximal	UTR5	81.68	30.97	36.79	68.35	20.4	33.04	97.29	122.44	157.49
chr1	223126	223232	chr1.capped.72	10	-	AT1G01610	-41	intron	CDS	0.55	0.99	0.76	0.35	0.26	1.55	0.26	1.26	1.33
chr1	224242	224361	chr1.capped.73	31	-	AT1G01610	0	proximal	UTR5	72.62	58.61	46.54	72.6	33.64	47.03	92.37	115.04	71.32
chr1	227223	227312	chr1.capped.74	13	-	AT1G01620	0	proximal	UTR5	130.03	160.04	191.85	182.1	172.06	214.44	410.2	570.1	791.86
chr1	229000	229205	chr1.capped.75	164	+	AT1G01630	0	proximal	UTR5	55.23	49.97	46.13	70.49	31.64	76.42	64.59	67.51	66.08
chr1	232396	232569	chr1.capped.76	106	-	AT1G01640	0	proximal	UTR5	0.46	0.69	2.06	0.06	0.63	0.47	2.9	5.02	2.2
chr1	237657	237843	chr1.capped.77	82	-	AT1G01650	0	proximal	UTR5	8.06	8.97	8.33	10.34	6.37	8.49	20.5	20.96	20.05
chr1	245928	246079	chr1.capped.78	62	-	AT1G01670	0	proximal	UTR5	0.68	1.15	1.65	0.81	0.66	1.08	1.8	1.47	1.1
chr1	249037	249226	chr1.capped.79	89	+	AT1G01690	0	proximal	UTR5	2.24	2.79	2.2	2.01	1.92	1.05	3.11	2.89	3.46
chr1	252118	252183	chr1.noncapped.80	33	+	AT1G01690	0	distal	CDS	0.75	0.79	0.59	1.02	0.42	0.39	0.14	0	0.24
chr1	258741	258911	chr1.capped.81	71	+	AT1G04037	0	antisense	NC	5.48	5.28	5.67	7.09	3.1	7.99	5.91	6.82	9.78
chr1	262826	262921	chr1.capped.82	69	+	AT1G01710	0	proximal	UTR5	8.8	6.67	8.08	7.24	4.83	8.73	17.32	16.17	14.03
chr1	266402	266582	chr1.capped.83	55	+	AT1G01715	0	proximal	UTR5	1.37	2.54	3.58	1.64	1.97	1.89	4.28	5.11	4.94
chr1	267436	267438	chr1.noncapped.84	1	-	AT1G01715	0	antisense	CDS	3.08	0.2	0.19	0.54	0.94	0.79	0.18	0.31	0.08
chr1	268328	268346	chr1.capped.85	1	+	AT1G01720	0	single-exon	UTR5	26.92	23.25	26.64	47.79	35.24	54.03	61.87	47.48	50.18
chr1	270646	270797	chr1.capped.87	128	-	AT1G01725	0	single-exon	UTR5	18.27	20.33	23.94	24.34	25.75	29.74	42.48	45.3	26.38
chr1	270910	271006	chr1.capped.86	56	+	AT1G01730	0	proximal	UTR5	13.88	22.86	24.8	27.83	22.35	27.62	70	63.59	104.36
chr1	274694	274823	chr1.capped.88	7	-	AT1G01740	0	proximal	UTR5	0.54	0.81	0.73	1.28	0.48	0.54	0.73	0.26	0.95
chr1	275359	275580	chr1.capped.89	140	+	AT1G01750	0	single-exon	UTR5	2.21	2.17	1.85	1.26	1.03	4.23	2.89	4.45	0.8
chr1	278411	278531	chr1.capped.91	55	-	AT1G01760	0	proximal	CDS	0.59	1.15	1.41	1.22	1.04	0.92	2.35	2.15	1.57
chr1	278582	278697	chr1.capped.90	21	+	AT1G01770	0	proximal	UTR5	1.43	1.01	1.81	1.22	0.61	1.71	2.12	2.82	2.66
chr1	282566	282845	chr1.capped.92	190	+	AT1G01770	0	distal	UTR3	36.32	49.64	50.2	50.34	112.71	168.4	15.55	96.16	44.65
chr1	284440	284621	chr1.capped.93	46	+	AT1G01790	0	proximal	UTR5	7.15	5.71	3.76	8.17	4.81	5.72	15.65	13.82	21.07
chr1	293236	293458	chr1.capped.94	142	+	AT1G01800	0	proximal	UTR5	27.75	26.12	29.47	37.89	19.19	35.03	54.77	59.82	78.69
chr1	295206	295218	chr1.capped.95	9	+	AT1G01810	0	single-exon	UTR5	1	1.53	3.18	3.7	3.2	2.26	3.88	2.33	5.93
chr1	298032	298280	chr1.capped.96	55	-	AT1G01820	0	proximal	UTR5	13.51	18.4	15.96	16.45	13	12.91	24.97	32	24.83
chr1	300656	300803	chr1.capped.97	124	-	AT1G01830	0	proximal	UTR5	3.68	2.43	1.27	3.63	2.51	1.73	2.86	5.05	2.99
chr1	300814	300892	chr1.capped.98	29	-	AT1G01830	0	proximal	UTR5	1.31	2.08	1.98	0.95	1.57	0.57	5.79	6.5	6.31
chr1	302103	302421	chr1.capped.99	150	-	AT1G01830	0	proximal	UTR5	4.74	6.94	5.23	7.92	6.34	5.33	10.25	14.13	10.31
chr1	303530	303605	chr1.capped.100	4	+	AT1G01840	-2	upstream	UTR5	2.94	2.62	3.95	4.01	3.19	2.95	4.51	4.15	4.99
chr1	306226	306346	chr1.capped.102	55	-	AT1G01860	0	proximal	UTR5	3.13	5.05	3.59	3.03	2.13	2.42	5.98	5.61	7.12
chr1	306377	306391	chr1.capped.101	6	+	AT1G01870	0	single-exon	NC	1	0	0	1.93	1.23	1.04	0.11	0	0.07
chr1	309026	309130	chr1.capped.103	102	-	AT1G01880	0	proximal	UTR5	1.26	1.65	1.53	0.62	1.55	3.21	3.3	2.5	1.66
chr1	309665	309701	chr1.capped.104	22	-	AT1G01880	-147	upstream	UTR5	1.18	0.58	0.17	0.38	0.25	0.15	0.26	0.27	0.32
chr1	310214	310396	chr1.capped.105	89	+	AT1G01900	0	proximal	UTR5	4.45	1.52	1.18	3.93	1.79	3.52	2.12	3.36	7.36
chr1	315854	315942	chr1.capped.107	45	-	AT1G01910	0	proximal	UTR5	19.46	23.44	15.59	22.32	14.52	17.9	32.67	34.59	48.09
chr1	316090	316204	chr1.capped.106	85	+	AT1G01920	0	proximal	UTR5	6.36	6.32	6.56	7.86	2.97	6.92	7.69	8.4	10.55
chr1	322792	322889	chr1.capped.109	79	-	AT1G01930	0	proximal	UTR5	3.44	3.9	2.96	2.61	1.46	2.13	3.04	6.17	4.9
chr1	322976	323078	chr1.capped.108	50	+	AT1G01940	0	proximal	UTR5	10.94	12.12	14.93	16.58	5.84	13.4	20.91	19.22	23.56
chr1	325297	325449	chr1.capped.110	80	+	AT1G01950	-1	upstream	UTR5	3.67	2.05	2.2	2.25	4.31	3.76	2.32	3.24	4.46
chr1	335229	335266	chr1.noncapped.111	22	-	AT1G01960	0	distal	CDS	0.08	0.1	0.23	0.64	0	0.73	0.06	0.15	0.08
chr1	337700	337874	chr1.capped.112	79	-	AT1G01960	0	proximal	UTR5	3.82	5.88	2.87	4.05	2.78	3.31	2.75	3.3	1.18
chr1	338255	338335	chr1.capped.113	11	+	AT1G01970	0	proximal	UTR5	5.6	5.74	4.75	4.14	2.89	5.4	6.28	6.25	6.24
chr1	339517	339560	chr1.noncapped.114	30	+	AT1G01970	0	distal	CDS	0.05	0.16	0.22	1.35	0.45	0.62	0	0	0
chr1	339629	339679	chr1.noncapped.115	34	+	AT1G01970	0	distal	CDS	0.23	0.52	0.22	0	0.81	0.99	0.37	0	0.16
chr1	340437	340528	chr1.noncapped.116	53	-	AT1G01980	0	single-exon	CDS	0.53	3.07	1.1	0.07	0.3	1.05	0	0.24	0
chr1	342000	342111	chr1.capped.117	48	-	AT1G01980	-9	upstream	UTR5	2.76	14.89	4.14	3.21	3.87	8.76	0.51	5.57	0.31
chr1	344294	344357	chr1.capped.118	48	-	AT1G01990	0	single-exon	UTR5	8.78	13.15	12.21	9.44	9.48	9.76	21.89	21.35	36.09
chr1	345772	345936	chr1.capped.119	91	+	AT1G02000	0	single-exon	UTR5	9.52	31.48	24.42	14.68	17.89	37	14.21	22.62	15.54
chr1	347745	348052	chr1.capped.120	267	+	AT1G02010	0	proximal	UTR5	3.09	3.75	2.47	5.2	2.86	3.79	3.12	7.74	6.16
chr1	354735	354861	chr1.capped.121	56	-	AT1G02020	0	single-exon	CDS	2.23	3.99	3.01	3.25	1.07	3.59	8.79	8.52	11.8
chr1	354899	355082	chr1.capped.122	63	-	AT1G02020	0	single-exon	UTR5	0.15	0.27	0.15	0.5	0	0.06	0.59	1.07	0.4
chr1	356154	356288	chr1.capped.123	131	-	AT1G02020	0	single-exon	UTR5	0.27	0.27	0.64	0.43	1.59	0.63	1.39	1.21	1.25
chr1	358885	358911	chr1.capped.124	25	-	AT1G02040	0	single-exon	CDS	3.72	3.27	9.01	7.96	4.41	9.37	4.26	19.94	11.38
chr1	360491	360502	chr1.capped.125	8	-	AT1G02050	0	proximal	UTR5	5.87	8.82	8.35	5.66	9.65	4.73	44.42	47.41	21.36
chr1	363006	363173	chr1.capped.126	110	-	AT1G02060	0	single-exon	UTR5	1.33	1.1	1.61	1.22	1.27	0.75	2.03	1.58	2.12
chr1	365308	365483	chr1.capped.127	166	+	AT1G02065	0	single-exon	UTR5	1.97	3.17	3.86	1.72	1.4	1.75	2.71	6.62	7.38
chr1	365499	365620	chr1.capped.128	67	+	AT1G02065	0	single-exon	UTR5	6.82	9.32	11.63	8.29	6.16	8.97	17.56	33.96	36.57
chr1	367283	367285	chr1.noncapped.129	1	-	AT1G02067	-119	upstream	UTR5	0	0.06	0.54	0	0	0	0.6	3.83	3.43
chr1	370915	370998	chr1.capped.130	51	-	AT1G02070	0	proximal	UTR5	3.8	3.19	5.98	4.86	3.52	4.68	2.18	3.28	3.36
chr1	371058	371186	chr1.capped.131	31	-	AT1G02070	0	proximal	UTR5	0.89	1.45	1.35	1.28	0.55	0.88	3.11	0.41	1.49
chr1	373471	373660	chr1.capped.132	24	+	AT1G02080	0	proximal	CDS	1.61	1.94	1.47	1.58	3.59	3.43	1.63	1.43	0.4
chr1	375014	375018	chr1.noncapped.133	1	-	AT1G02080	94	intronic antisense	CDS	1.36	0.55	0.03	0.97	2.22	0.07	0.04	0.11	0.12
chr1	389590	389660	chr1.capped.134	54	-	AT1G02090	0	proximal	UTR5	28.16	37.01	31.94	38.58	22.53	30.18	61.88	62.36	59.63
chr1	389807	389882	chr1.capped.135	7	+	AT1G02100	0	proximal	UTR5	7.94	8.73	6.29	13.07	7.24	9.45	19.09	24.6	28.61
chr1	392752	392815	chr1.capped.136	28	+	AT1G02100	0	distal	UTR3	2.61	3.43	2.55	5.36	3.33	4.37	3.79	3.34	5.08
chr1	392830	392941	chr1.capped.137	21	+	AT1G02110	0	proximal	UTR5	3.9	5.11	3.32	4.92	5.07	5.09	5.79	6.9	8.18
chr1	395647	395791	chr1.capped.138	109	+	AT1G02120	0	proximal	UTR5	6.77	6.2	6.63	7.83	2.98	6.49	12.52	13.22	15.34
chr1	401792	401881	chr1.capped.139	52	-	AT1G02130	0	proximal	UTR5	27.86	33.34	38.75	36.87	28.49	25.94	50.73	48.56	45.17
chr1	404418	404439	chr1.capped.141	20	-	AT1G02140	0	proximal	UTR5	112.22	126.72	112.73	154.79	119.12	142.61	370.96	298.48	440.43
chr1	404568	404729	chr1.capped.140	49	+	AT1G02145	0	proximal	UTR5	4.82	6.01	6.08	6.9	2.9	6.03	11.31	8.66	12.95
chr1	408700	408789	chr1.capped.142	49	+	AT1G02150	0	proximal	UTR5	18.1	17.14	14.43	21.42	7.18	15.63	26.72	29.75	55.02
chr1	410746	410795	chr1.capped.143	6	+	AT1G02160	0	proximal	UTR5	39.1	50.38	50.25	70.8	47.45	78.29	90.7	82.12	62.73
chr1	411726	411865	chr1.capped.144	72	+	AT1G02170	0	proximal	UTR5	7.1	7.75	8.61	9.65	8.12	13.42	11.69	17.19	18.42
chr1	414557	414661	chr1.capped.145	60	-	AT1G02180	0	proximal	UTR5	7.21	10.14	6.41	7.12	4.92	5.88	28.84	20.85	22.27
chr1	415072	415146	chr1.capped.146	1	+	AT1G02190	0	proximal	UTR5	48.15	47.93	46.74	46.83	24.89	76.4	56.91	62.34	65.86
chr1	415609	415612	chr1.noncapped.147	1	-	AT1G02190	0	antisense	CDS	7.65	8.62	12.03	6.18	8.64	9.37	1.07	0.47	0
chr1	418762	418787	chr1.capped.148	18	+	AT1G02205	0	proximal	UTR5	248.58	197.11	199.2	241.53	113.78	224.01	184.49	215.76	241.85
chr1	419707	419717	chr1.noncapped.149	6	-	AT1G02205	0	antisense	CDS	17.91	26.02	49.63	7.64	7.17	16.22	2.86	2.21	0.08
chr1	430653	430670	chr1.capped.150	15	-	AT1G02220	0	proximal	UTR5	0.54	0.18	0.6	0.33	0	0.33	1.33	2.64	1.79
chr1	442818	442991	chr1.capped.151	59	-	AT1G02260	0	proximal	UTR5	2.47	2.19	2.61	3.38	2.23	3.06	3.37	6.96	6.88
chr1	446166	446262	chr1.capped.152	45	-	AT1G02270	0	proximal	UTR5	6.06	7.75	4.29	4.58	3.98	6.33	10.34	5.65	9.28
chr1	450280	450331	chr1.capped.153	1	-	AT1G02280	-24	intron	UTR5	0.13	0.15	0.05	0.25	0.79	0.19	0.87	0.22	0.93
chr1	450396	450426	chr1.capped.154	29	-	AT1G02280	0	proximal	UTR5	28.48	39.61	34.06	30.71	27.71	24.89	47.72	53.08	71.85
chr1	452626	452790	chr1.capped.155	71	-	AT1G02290	0	proximal	UTR5	2.68	4.37	3.44	2.7	1.53	2.36	5.06	8.17	9
chr1	453145	453330	chr1.capped.156	74	+	AT1G02300	0	proximal	UTR5	3.2	4.19	2.74	5.48	0.46	3.14	3.81	5.3	7.01
chr1	455686	455801	chr1.capped.157	56	+	AT1G02305	0	single-exon	UTR5	34.89	33.15	26.18	73.06	31.02	37.46	104.17	114.82	135.17
chr1	463533	463643	chr1.capped.158	26	-	AT1G02330	0	proximal	UTR5	12.64	17.89	15.81	16.06	17.67	21.28	41.21	35.17	41.54
chr1	463908	463992	chr1.noncapped.159	8	-	AT1G02335	0	distal	UTR3	1.38	1.16	0.4	0.43	2.42	0.29	0.3	0.22	0.56
chr1	464102	464222	chr1.noncapped.160	82	-	AT1G02335	0	distal	CDS	1.94	1.96	1.98	1.94	1.32	1.57	2.14	1.87	5.66
chr1	464246	464275	chr1.noncapped.161	10	-	AT1G02335	0	distal	CDS	0.09	0.52	0.64	0	0	0.06	0.05	0.07	0.86
chr1	464905	464990	chr1.capped.162	18	-	AT1G02335	0	proximal	UTR5	7.46	4.51	2.94	6.42	3.16	7.31	11.73	19.44	55.65
chr1	466806	466909	chr1.capped.163	19	-	AT1G02340	-29	intron	CDS	0.12	0.2	0.41	0.49	0	0.23	1.68	1.04	0.32
chr1	467744	467815	chr1.capped.164	11	-	AT1G02340	0	proximal	UTR5	14.78	15.29	18.14	17.14	13	18.01	28.58	40.8	28.6
chr1	469802	469863	chr1.capped.165	5	+	AT1G02350	-10	upstream	UTR5	3.29	3.17	2.15	4.03	2.45	3.98	7.59	4.21	6.17
chr1	471438	471633	chr1.capped.166	71	-	.	.	intergenic	.	18.45	21.52	14.05	21.73	18.06	12.93	29.82	24.54	20.05
chr1	474443	474528	chr1.capped.167	63	+	AT1G02370	0	proximal	UTR5	4.02	4.62	2.95	5.03	3.15	4.27	10.04	5.19	9.68
chr1	477105	477173	chr1.capped.168	23	+	AT1G02380	0	proximal	UTR5	0.57	1.42	1.89	1.78	2.77	2	2.02	4.7	2.81
chr1	480852	480857	chr1.capped.169	1	+	AT1G02390	0	proximal	UTR5	0.91	1.58	1.34	1.34	1.09	3.54	0.05	1.75	1.56
chr1	486853	486906	chr1.capped.170	47	+	AT1G02400	0	proximal	UTR5	0.61	0.19	0.47	0.96	1.78	3.07	1.38	0.45	0.08
chr1	490849	490971	chr1.capped.171	22	+	AT1G02410	0	proximal	UTR5	12.92	15.52	12.71	15.81	10.95	18.79	40.36	33.52	48.97
chr1	493483	493708	chr1.capped.172	103	+	AT1G02420	-52	upstream	UTR5	0.53	1.01	1.24	1.15	0.52	0.43	1.59	1.15	1.74
chr1	497993	498042	chr1.noncapped.173	39	-	AT1G02450	0	single-exon	UTR3	0.11	0.05	0	1.56	0.61	0	0	0	0
chr1	498411	498549	chr1.capped.174	105	-	AT1G02450	0	single-exon	UTR5	6.91	6.37	4.77	6.92	4.4	4.64	4.01	3.75	1.57
chr1	507215	507225	chr1.capped.175	6	-	AT1G02460	0	proximal	UTR5	0.65	0.19	0.3	0.9	2.23	0.31	0.29	1.3	0.94
chr1	512080	512119	chr1.noncapped.176	25	-	AT1G02470	0	distal	CDS	1.17	1.2	1.49	0.34	0.96	1.77	0.86	1.3	0.08
chr1	513530	513721	chr1.capped.177	70	-	AT1G02470	0	proximal	UTR5	7.13	13.71	13.62	7.56	16.04	12.74	18.12	28.68	12.5
chr1	515277	515414	chr1.capped.178	42	-	AT1G02475	0	proximal	CDS	19.99	18.36	20.71	28.81	17.26	18.79	44.13	38.27	43.17
chr1	518249	518259	chr1.capped.179	4	+	AT1G02500	0	proximal	UTR5	79.09	109.13	144.73	99.4	70.46	129.78	222.58	248.7	642.57
chr1	521625	521748	chr1.capped.180	89	-	AT1G02510	-47	upstream	UTR5	0	0.62	0.75	0.09	0	0.39	1.26	3.72	0.86
chr1	523830	523979	chr1.noncapped.181	1	+	AT1G02520	0	proximal	UTR5	0.14	0.34	0.72	0	0.6	0.63	1.24	1.04	0.24
chr1	537867	537914	chr1.capped.182	32	+	AT1G02560	0	proximal	UTR5	108.78	91.82	53.44	117.29	67.84	129.92	275.93	196.25	221.17
chr1	555955	556032	chr1.capped.183	29	-	AT1G02610	0	proximal	UTR5	2.21	4	5.07	3.18	8.96	7.15	2.59	10.65	3.83
chr1	562352	562512	chr1.capped.184	75	-	AT1G02630	0	proximal	UTR5	0.82	0.86	0.74	0.31	1.85	0.32	0.95	2.26	2.26
chr1	564100	564316	chr1.capped.185	102	+	AT1G02640	0	proximal	UTR5	4.45	7.12	3.35	3.78	4.43	4.7	11.28	11.89	8.79
chr1	565681	565813	chr1.capped.186	8	-	AT1G02640	0	antisense	CDS	0.22	0.1	0.6	0.83	0.48	0.53	2.6	1.11	0.39
chr1	566072	566164	chr1.capped.187	31	+	AT1G02640	0	distal	CDS	0.1	0.23	0.56	0.06	0.47	0.92	1.27	1.88	1.51
chr1	572167	572238	chr1.noncapped.188	48	-	AT1G02660	0	distal	CDS	0.54	1.07	2.15	0.06	3.29	0.77	1.12	0.9	0.16
chr1	574769	574985	chr1.capped.190	7	-	AT1G02660	0	proximal	UTR5	2.87	6.52	5.43	2.59	5.69	11.65	3.02	12.23	4.63
chr1	574900	574903	chr1.capped.189	2	+	AT1G02660	0	antisense	UTR5	0.21	0.42	0	0	0.72	1.69	0.19	0	0.04
chr1	576431	576531	chr1.capped.191	74	+	AT1G02670	0	proximal	CDS	1.01	1.73	1.86	2.5	0.97	1.65	1.6	2.83	1.64
chr1	580641	580669	chr1.capped.192	7	+	AT1G02680	0	proximal	UTR5	14.94	19.46	19.33	22.61	15.98	22.97	31.78	26.98	29.07
chr1	582235	582371	chr1.capped.193	61	+	AT1G02680	0	distal	UTR3	0.55	1.12	1.47	0.69	1.59	4.72	0.16	2.16	0.86
chr1	584260	584272	chr1.capped.194	10	+	AT1G02690	0	proximal	UTR5	3.15	5.32	5.07	4.37	1.47	2.55	8.31	8.53	8.73
chr1	588293	588390	chr1.capped.195	39	+	AT1G02700	0	proximal	UTR5	0	0	0.12	0.09	0.91	0.65	1.29	1.54	0.93
chr1	589188	589324	chr1.capped.196	35	-	AT1G02700	0	antisense	CDS	0.16	0.26	0.04	0	0	0	1.11	0.61	1.42
chr1	589516	589559	chr1.capped.197	23	+	AT1G02705	-44	upstream	UTR5	2.35	1.48	1.66	2.6	1.08	3.91	4.89	6.5	11.94
chr1	591820	591971	chr1.capped.198	96	+	AT1G02720	0	single-exon	UTR5	4.48	5.15	3.1	3.83	2.32	5.38	4.86	5.75	9.69
chr1	592038	592085	chr1.capped.199	31	+	AT1G02720	0	single-exon	UTR5	0.98	0.41	0.61	1.23	0	0.24	1.26	2.74	2.2
chr1	593237	593323	chr1.capped.200	28	-	AT1G02720	0	antisense	UTR3	1.01	0.9	0.58	1.58	0	0.08	1.66	1.8	2.28
chr1	598616	598664	chr1.capped.201	40	-	AT1G02730	0	proximal	UTR5	2.68	5.22	1.75	1.83	0.36	1.15	2.71	2.1	4.53
chr1	602058	602202	chr1.capped.202	75	-	AT1G02740	0	proximal	UTR5	3.33	5.08	2.55	5.14	3.19	5.56	6.6	5.7	6.25
chr1	602495	602634	chr1.capped.203	57	+	AT1G02750	0	proximal	UTR5	7.85	7.25	10.16	12.48	5.69	12.9	13.84	15.69	16.08
chr1	606652	606695	chr1.capped.204	40	-	AT1G02770	0	proximal	UTR5	0.34	0.56	1.03	0.66	1.03	2.55	1.97	2.54	2.11
chr1	609421	609434	chr1.capped.205	12	-	AT1G02780	0	proximal	UTR5	391.24	483.31	431.2	486.94	403.94	372.68	884.95	595.01	662.38
chr1	612292	612299	chr1.capped.206	1	-	AT1G02790	0	proximal	UTR5	333.74	598.56	461.59	457.56	2166.41	1189.62	100.84	1022.3	458.32
chr1	616143	616191	chr1.capped.207	44	-	AT1G02800	0	proximal	UTR5	9.19	15.18	7.37	9.04	7.99	6.51	17.82	9.93	5.7
chr1	618260	618295	chr1.capped.208	2	+	AT1G02810	0	proximal	UTR5	1.81	0.68	1.29	1.79	0.82	3.42	1.7	0.54	1.95
chr1	619319	619391	chr1.capped.209	3	-	AT1G02810	0	antisense	CDS	1.02	1.38	1.64	1.53	1.29	1.24	2.53	2.83	4.14
chr1	620676	620756	chr1.capped.210	1	+	AT1G02813	0	single-exon	UTR5	1.63	17.05	40.6	2.68	32.22	18.44	97.75	144.65	37.74
chr1	621456	621643	chr1.capped.211	134	+	AT1G02816	0	single-exon	UTR5	17.67	16.2	18.07	19.87	11.61	47.8	51.97	71.22	64.23
chr1	623958	624136	chr1.noncapped.212	74	-	AT1G02820	0	distal	CDS	3.58	6.79	6.4	4.11	3.02	1.58	2.05	0.82	0
chr1	624426	624577	chr1.capped.213	47	-	AT1G02820	0	proximal	UTR5	2.9	4.33	5.14	3.7	3.92	4.08	11.13	8.18	3.13
chr1	626740	626812	chr1.capped.214	39	+	AT1G02840	0	proximal	UTR5	38.12	37.4	28.75	58	30.5	57.53	71.1	61.61	63.05
chr1	630476	630571	chr1.capped.215	41	+	AT1G02850	0	proximal	UTR5	5.1	5.17	5.55	9.94	4.78	10.19	21.76	23.52	20.37
chr1	635120	635429	chr1.capped.216	163	+	AT1G02860	0	proximal	UTR5	3.85	2.52	1.62	4.16	3.74	4.73	5.09	7.02	7.28
chr1	638608	638696	chr1.capped.217	37	-	AT1G02870	0	single-exon	UTR5	18.86	23.57	28.05	24.52	23.21	21.65	43.69	25.12	22.13
chr1	641505	641583	chr1.capped.218	40	+	.	.	intergenic	.	2.92	3.42	2.67	2.05	3.57	6.5	4.68	4.95	4.31
chr1	644465	644563	chr1.capped.219	94	-	AT1G02880	0	proximal	UTR5	6.37	5.29	8.83	6.88	4.47	4.33	13.77	11.02	13.21
chr1	645168	645243	chr1.noncapped.220	10	-	AT1G02890	0	distal	UTR3	0.56	0.56	0.13	0.96	0.82	0.26	0.2	0.23	0.16
chr1	651843	652001	chr1.capped.221	62	-	AT1G02890	0	proximal	UTR5	4.23	4.66	4.49	2.07	3.56	3.53	3.7	7.62	2.66
chr1	654333	654372	chr1.capped.222	34	-	AT1G02900	0	single-exon	UTR5	2.36	4.34	8.07	1.36	8.56	3.13	21.95	16.42	9.42
chr1	658103	658216	chr1.capped.223	40	-	AT1G02910	0	proximal	UTR5	10.5	14.19	7.65	9.92	7.25	8.04	21.15	23.74	17.22
chr1	662257	662311	chr1.capped.224	8	-	AT1G02930	0	proximal	UTR5	1.16	2.66	2.88	2.01	5.6	0.81	1.5	1.71	1.02
chr1	665349	665377	chr1.capped.225	11	+	AT1G02952	0	single-exon	NC	0.56	1.22	2.15	0.92	2.12	2.93	1.33	2.65	1.64
chr1	666359	666491	chr1.capped.226	85	-	AT1G02950	0	proximal	CDS	2.65	1.58	1.12	2.37	1.03	1.87	1.29	2.82	2.72
chr1	669778	669870	chr1.capped.227	26	-	AT1G02960	0	proximal	UTR5	3.61	5.19	3.18	4.79	4.09	3.37	7.06	8.03	11.32
chr1	673342	673443	chr1.capped.228	59	+	AT1G02970	0	proximal	UTR5	1.53	1.23	2.27	1.28	1.43	1.95	1.99	1.13	1.88
chr1	687203	687422	chr1.capped.229	107	-	AT1G02990	0	proximal	UTR5	3.79	4.83	3.25	6.07	2.99	2.93	10.25	10.84	8.93
chr1	692475	692616	chr1.capped.230	84	-	AT1G03000	0	proximal	UTR5	2.88	2.71	2.69	2.72	3	2.88	4.71	5.47	6.41
chr1	698508	698603	chr1.capped.231	88	-	AT1G03020	-6	upstream	UTR5	0.5	0.5	0.84	0.73	0.42	0.92	0.28	0.45	0.24
chr1	701469	701569	chr1.capped.232	1	+	AT1G03030	0	proximal	UTR5	4.12	5.03	5.52	4.82	2.15	7.49	12.53	10.55	13.59
chr1	706536	706661	chr1.capped.233	94	-	AT1G03040	-1	upstream	UTR5	12.1	17.41	19.31	15.88	8.05	13.1	35.28	32.13	29.1
chr1	707467	707595	chr1.capped.234	85	+	AT1G03050	0	proximal	UTR5	11.29	26.07	9.99	11.71	19.26	29.41	3.86	40.04	8.28
chr1	711717	711849	chr1.capped.235	122	-	AT1G03055	0	proximal	UTR5	2.65	0.9	1.24	3.75	4.45	6.11	4.33	6.44	6.65
chr1	712658	712805	chr1.noncapped.236	38	-	AT1G03060	0	distal	UTR3	1.05	1.47	1.54	0.92	0.5	0.39	0.58	2.73	2.05
chr1	726573	726620	chr1.capped.237	42	+	AT1G03060	94	intronic antisense	CDS	0.32	0	0	0.64	0	0.73	0	0	0
chr1	727196	727576	chr1.capped.238	334	-	AT1G03060	0	proximal	UTR5	7.61	4.28	2.74	10.23	14.92	9.71	7.07	6.54	3.47
chr1	729895	729991	chr1.capped.239	39	+	AT1G03070	0	proximal	UTR5	2.29	2.75	2.68	4.11	2.44	4.45	3.33	10.68	6.02
chr1	737955	738034	chr1.capped.240	64	-	AT1G03080	0	proximal	UTR5	11.07	8.54	5.68	18.93	25.34	10.41	16.2	15.91	9.18
chr1	739674	739713	chr1.capped.241	12	+	AT1G03090	0	proximal	UTR5	4.21	4.64	2.16	3.21	2.85	7.54	13.82	13.83	15.35
chr1	749235	749349	chr1.capped.242	45	+	AT1G03110	0	proximal	UTR5	6.91	6.43	7.29	12.69	6.84	12.11	15.12	8	22.29
chr1	752178	752310	chr1.capped.243	71	+	AT1G03120	0	proximal	UTR5	1.56	2.36	3.44	2.87	1.97	2.41	2.2	5.29	4.45
chr1	754150	754204	chr1.capped.244	24	-	AT1G03130	0	single-exon	UTR5	171.66	237.14	250.2	198.01	140.23	209.86	258.13	356.29	484.59
chr1	756254	756307	chr1.capped.246	10	-	AT1G03140	0	single-exon	UTR5	9.8	14.99	14.95	14.95	7.92	9.09	31.36	27.04	24.63
chr1	756394	756490	chr1.capped.245	23	+	AT1G03150	0	proximal	UTR5	16.29	14.32	12.7	14.69	10.32	32.36	34.56	26.1	34.13
chr1	761255	761321	chr1.capped.247	29	+	AT1G03160	0	proximal	UTR5	12.59	11.86	11.77	14.77	10.57	21.78	13.17	9.07	7.95
chr1	769629	769638	chr1.capped.248	2	+	AT1G03170	0	single-exon	UTR5	11.36	5.66	7.7	6.69	5.76	31.92	15.02	12.61	10.21
chr1	773357	773487	chr1.capped.249	46	+	AT1G03180	0	proximal	UTR5	2.74	3.02	2.81	3.06	1.36	3.5	4.03	2.85	3.37
chr1	775511	775550	chr1.capped.250	15	+	AT1G03190	0	proximal	UTR5	1.17	1.34	1	2.1	1.85	0.98	5.17	3.46	3.6
chr1	780489	780658	chr1.capped.251	85	+	AT1G03200	0	proximal	UTR5	0.23	0.57	0.9	0.69	0.38	0.34	0.55	1.01	0.89
chr1	781557	781609	chr1.noncapped.252	51	-	.	.	intergenic	.	0	0	0	0	0.54	0.63	0	0	0.02
chr1	782896	783041	chr1.capped.253	43	+	AT1G03210	0	proximal	UTR5	8.5	7.75	9.12	10.99	6.36	20.11	22.38	21.95	32.06
chr1	787122	787127	chr1.capped.254	1	+	AT1G03220	0	single-exon	UTR5	0.54	1.29	1.9	2.05	2.5	4.26	5.14	5.5	9.42
chr1	789939	790110	chr1.capped.255	137	+	AT1G03230	0	single-exon	UTR5	1.62	3.16	1.3	1.94	0.41	1.27	3.81	4.42	4.63
chr1	795240	795375	chr1.capped.256	99	-	AT1G03250	0	proximal	UTR5	14.15	12.05	8.87	12.66	8.22	13.14	36.08	31.54	31.59
chr1	798415	798490	chr1.capped.257	42	-	AT1G03260	0	proximal	UTR5	5.03	6.23	6	6.98	4.75	7.32	8.19	9.8	9.84
chr1	798983	799190	chr1.capped.258	132	+	AT1G03270	0	proximal	UTR5	3.1	3.18	2.51	7.95	2.32	2.31	2.83	3.6	3.29
chr1	803023	803185	chr1.capped.259	44	+	AT1G03280	0	proximal	UTR5	8.26	7.94	9.33	20.72	5.49	15.13	11	12.23	8.42
chr1	807350	807428	chr1.capped.260	52	+	AT1G03290	0	proximal	UTR5	12.03	11.96	17.52	17.13	10.96	23.67	34.7	33.65	21.35
chr1	810553	810579	chr1.noncapped.261	3	+	AT1G03290	0	distal	CDS	0.08	0.44	0.53	0.73	0	0.75	0	0.59	0
chr1	813058	813223	chr1.capped.262	81	-	AT1G03300	-54	upstream	UTR5	1.8	2.16	1.81	1.63	1.72	1.26	6.04	3.95	3.54
chr1	813386	813570	chr1.capped.263	92	+	AT1G03310	0	proximal	UTR5	6.81	6.14	3.57	7.81	1.8	4.11	5.54	4.27	3.92
chr1	816295	816370	chr1.noncapped.264	49	+	AT1G03310	0	distal	CDS	9.93	6.22	4.61	6.56	1.35	3.08	2.1	2.31	5.31
chr1	819309	819435	chr1.capped.265	66	-	AT1G03330	0	proximal	UTR5	26.94	40.07	41.33	37.07	34.27	36.47	79.79	70.06	45.33
chr1	819564	819722	chr1.capped.266	84	+	AT1G03340	0	proximal	UTR5	0.29	0.34	0.66	0.2	0.84	0.18	1.34	2.57	1.34
chr1	824283	824422	chr1.capped.268	109	-	AT1G03350	0	single-exon	UTR5	12.29	8.83	9.04	8.91	5.66	9.29	30.24	29.88	25.97
chr1	824504	824603	chr1.capped.267	41	+	AT1G03360	0	proximal	UTR5	8.82	8.68	12.87	8.49	6.6	6.57	11.15	12.59	13.87
chr1	826568	826616	chr1.capped.269	1	+	AT1G03365	0	proximal	UTR5	3.3	3.05	2.93	6.06	2.44	5.67	3.56	4.42	6.79
chr1	829016	829055	chr1.noncapped.270	24	+	AT1G03365	0	proximal	CDS	0	0.12	0.06	0.59	0.54	0.24	0.12	0.31	0.08
chr1	830544	830739	chr1.capped.271	66	+	AT1G03370	0	proximal	UTR5	1.05	0.8	0.48	1.06	1.66	1.62	1.71	2.61	1.03
chr1	835734	835909	chr1.capped.272	91	+	AT1G03380	0	proximal	UTR5	2.08	2.2	1.72	3.82	3.54	2.18	3.28	6.46	6.05
chr1	842442	842465	chr1.capped.273	12	-	AT1G03390	-37	upstream	UTR5	0.91	1.77	0.78	0.5	0.34	0.35	4.95	3.94	2.89
chr1	844102	844283	chr1.capped.274	79	-	AT1G03400	0	proximal	UTR5	1.56	0.66	1.82	1.66	1.64	1.56	9.69	8.73	9.84
chr1	846412	846575	chr1.capped.275	82	-	AT1G03410	0	single-exon	CDS	0.1	0.25	0.54	1.32	1.25	0.03	1.39	0.48	1.03
chr1	846669	846834	chr1.capped.276	141	+	AT1G04183	0	single-exon	NC	13.77	13.58	13.84	18.73	6.3	13.29	19.66	21.9	37.89
chr1	847651	847764	chr1.capped.278	61	-	AT1G03410	-30	upstream	UTR5	3.95	5.75	4.34	7.55	5.11	8.91	8.56	12.13	12.63
chr1	847775	847959	chr1.capped.277	99	+	AT1G03430	0	proximal	UTR5	7.24	6.98	6.28	11.8	4.44	10.07	9.16	9.15	6.5
chr1	852273	852412	chr1.capped.279	104	+	AT1G03440	0	single-exon	UTR5	6.34	4.06	1.83	6.16	5.37	4.61	8.29	10.28	12.27
chr1	852647	852678	chr1.noncapped.280	8	+	AT1G03440	0	single-exon	UTR5	1.22	2.01	2.29	1.47	1.2	2.04	8.04	9.2	7.87
chr1	853983	854034	chr1.capped.281	44	-	AT1G03440	0	antisense	UTR3	0.3	0.18	0.23	1.05	1.84	0.95	1.28	0.62	0.62
chr1	863991	864180	chr1.capped.282	117	-	AT1G03457	0	proximal	UTR5	2.25	2.43	1.62	1.54	3.83	3.64	2.05	3.04	2.59
chr1	867670	867796	chr1.capped.283	74	-	AT1G03470	-12	upstream	UTR5	2.32	2.61	4.16	1.12	5.18	1.56	2.13	6.43	2.36
chr1	868814	868917	chr1.capped.284	35	-	.	.	intergenic	.	0.34	0.7	0.62	0.09	0.76	0.74	0.44	1.6	0.47
chr1	870311	870325	chr1.noncapped.285	4	-	AT1G03475	0	distal	CDS	0.25	0.64	0.42	0.11	0.83	0.68	0	0	0.08
chr1	871163	871299	chr1.capped.286	38	-	AT1G03475	0	proximal	UTR5	32.52	31.13	17.64	45.86	14.86	23.5	64.21	44.36	44.94
chr1	875168	875215	chr1.noncapped.287	21	-	AT1G04187	-1	upstream	NC	1.14	1.09	1.4	0	1.39	0	1.54	1.19	0
chr1	875601	875606	chr1.noncapped.288	3	-	ENSRNA049495699-T1	0	single-exon	NC	7.62	1.47	1.11	0.2	0.41	0	2.17	1.43	0.37
chr1	875890	875910	chr1.capped.289	7	-	AT1G04197	-75	upstream	NC	1.37	2.39	2.76	2.49	1.82	2.72	6.18	9.22	4.05
chr1	877481	877561	chr1.capped.290	48	-	AT1G03510	0	single-exon	CDS	0.72	0.52	0.63	0.36	1.52	0.03	0.75	1.39	1.49
chr1	879719	879909	chr1.capped.291	165	-	AT1G03520	0	proximal	UTR5	1.57	1.67	1.23	2.87	0.74	1.9	2.23	2.94	2.28
chr1	880028	880233	chr1.capped.292	76	-	AT1G03520	0	proximal	UTR5	1.17	2.25	1.74	3.34	0.86	2.61	3.42	1.96	2.2
chr1	883368	883579	chr1.capped.293	82	-	AT1G03530	0	proximal	UTR5	3.35	6.46	5.6	2.68	5.36	2.75	7.03	6.13	4.96
chr1	887784	887888	chr1.capped.294	83	-	AT1G03550	0	proximal	UTR5	4.48	3.56	4.07	5.58	3.51	8.59	4.83	23.21	7.96
chr1	889949	890038	chr1.capped.295	84	-	.	.	intergenic	.	1.65	2.93	2.07	2.02	1.53	2.76	1.24	3.64	1.98
chr1	892353	892470	chr1.capped.296	69	-	AT1G03560	0	single-exon	UTR5	1.3	2.32	1.78	3.34	0.63	1.32	6.43	6.01	3.83
chr1	896529	896578	chr1.noncapped.297	46	-	AT1G03590	-94	intron	UTR5	0	0.1	0.18	0.13	0	0.26	0.54	0.47	0.24
chr1	897310	897605	chr1.capped.298	90	-	AT1G03590	0	proximal	UTR5	8.85	9.46	11.43	9.71	4.02	8.76	17.66	24	13.45
chr1	898825	898927	chr1.capped.299	65	+	AT1G03600	0	single-exon	UTR5	84.53	82.57	91.44	94.46	58.94	142.38	170.57	167.43	189.14
chr1	899650	899673	chr1.noncapped.300	1	-	AT1G03600	0	antisense	UTR3	0	0.1	0.05	0	0.58	0.08	0.19	0.87	1.8
chr1	899736	899918	chr1.capped.301	89	-	.	.	intergenic	.	1.12	0.87	1.81	1.88	1.99	0.73	1.19	0.93	1.43
chr1	900686	900862	chr1.capped.302	48	+	AT1G03610	0	proximal	UTR5	2.21	4.14	4.23	6.26	6.21	6.86	2.36	6.74	8.36
chr1	900883	900920	chr1.capped.303	36	+	AT1G03610	0	proximal	UTR5	0.05	0.17	0.24	0.25	1.08	1.15	0.04	0.05	0.16
chr1	901039	901124	chr1.capped.304	48	+	AT1G03610	0	proximal	UTR5	3.75	2.99	5.07	3.97	2.37	5.2	2.56	6.02	4.76
chr1	901178	901209	chr1.capped.305	2	+	AT1G03610	0	proximal	UTR5	1.85	2.81	3.16	1.33	1.28	3.31	1.7	3.5	2.41
chr1	906538	906607	chr1.capped.306	29	-	AT1G03620	0	proximal	UTR5	0.17	0.31	0.53	0	0.35	0	0.81	1.11	0.08
chr1	907184	907373	chr1.capped.307	69	-	AT1G03620	0	proximal	UTR5	0.79	2.82	3.17	2.23	1.77	2.93	1	5.62	1.73
chr1	907623	907676	chr1.capped.308	33	+	AT1G03630	0	single-exon	UTR5	36.52	27.11	20.22	48.46	14.55	32.64	34.95	33.55	48.78
chr1	909578	909666	chr1.capped.309	80	-	.	.	intergenic	.	0.09	0.38	0.06	0	0	0	0.46	0.53	0.16
chr1	911136	911206	chr1.capped.310	56	-	AT1G03650	0	proximal	UTR5	2.39	2.58	3.44	3.99	2.16	2.7	5.28	4.32	1.65
chr1	913745	913865	chr1.capped.311	24	-	AT1G03660	0	single-exon	UTR5	0.39	0.9	0.51	0.73	1.09	0.91	2.02	1.69	1.45
chr1	917886	918064	chr1.capped.312	96	-	AT1G03680	0	proximal	UTR5	115.52	125.23	97.89	125.71	72.36	86.23	189.24	175.67	188.5
chr1	918283	918417	chr1.capped.313	17	+	AT1G03687	0	proximal	UTR5	2.93	3.99	3.32	4.56	3.09	4.44	8.81	6.27	6.72
chr1	920924	921072	chr1.capped.314	61	+	AT1G03700	0	proximal	UTR5	0.45	0.28	0.9	0	0.53	0.06	0.61	2.21	0.16
chr1	922893	922897	chr1.noncapped.315	3	-	.	.	intergenic	.	3.98	1.14	0.4	0.09	0.18	0.11	0.44	0.14	0.04
chr1	923367	923484	chr1.capped.316	58	+	AT1G03710	0	proximal	UTR5	7.27	9.75	12.25	10.3	7.6	24.87	51.6	36.2	33.27
chr1	927066	927177	chr1.capped.317	106	-	AT1G04207	0	single-exon	NC	0.12	0.56	0.43	0	0	0	0.52	0.6	0.63
chr1	930694	930901	chr1.capped.318	199	+	AT1G03730	0	antisense	UTR3	2.75	2.64	3.33	10.25	11.43	18.61	1.58	3.82	3.37
chr1	931566	931691	chr1.capped.319	39	-	AT1G03730	0	single-exon	UTR5	6.51	5.81	5.17	9.06	14.78	9.93	11.63	15.24	11.78
chr1	933433	933713	chr1.capped.320	279	+	AT1G03740	0	proximal	UTR5	0.93	1.32	0.98	0.93	1.67	0.84	0.28	1.11	1.59
chr1	937285	937289	chr1.noncapped.321	1	-	ENSRNA049495711-T1	0	single-exon	NC	85.35	36.71	16.44	0.47	0.71	0.4	46.78	22.68	14.56
chr1	937482	937581	chr1.noncapped.322	2	-	AT1G03746	0	single-exon	NC	50.63	40.62	12.67	4.09	5.84	3.73	37.27	26.02	15.52
chr1	937838	937961	chr1.capped.323	41	+	AT1G03750	0	proximal	UTR5	1.2	1.1	0.87	0.69	0.46	1.78	1.04	2.36	1.88
chr1	943338	943402	chr1.capped.324	63	-	AT1G03760	-25	upstream	UTR5	2.85	1.65	2.19	1.6	2.15	2.52	6.31	3.64	2.5
chr1	944572	944705	chr1.capped.325	22	+	AT1G03770	0	proximal	UTR5	1.77	1.3	1.73	1.16	1.22	3.58	1.36	2.13	1.64
chr1	951758	951864	chr1.capped.326	21	-	AT1G03780	0	proximal	UTR5	3.3	5.35	2.27	4.98	3.94	4.19	7.44	6.16	10.16
chr1	957969	958020	chr1.capped.327	47	-	AT1G03800	0	single-exon	UTR5	0	0.17	0.74	0.72	0	0.18	1.67	0.82	0.08
chr1	958660	958703	chr1.noncapped.328	18	+	AT1G03810	-80	upstream	UTR5	0.1	0.06	0.63	0.11	0	0	0.94	0.53	0.24
chr1	960003	960025	chr1.noncapped.329	9	-	AT1G03820	0	single-exon	CDS	0.97	0.89	0.31	2.1	0.94	2.22	0.78	1.23	0.72
chr1	960689	960867	chr1.capped.330	38	-	AT1G03820	0	single-exon	UTR5	11.06	7.92	5.29	13.37	7.95	7.22	15.22	11.44	30.9
chr1	966644	966815	chr1.capped.331	107	-	AT1G03830	0	proximal	UTR5	1.51	2.96	1.35	2.1	2.49	0.6	1.44	0.73	1.48
chr1	977745	977764	chr1.capped.332	15	-	AT1G03850	0	proximal	UTR5	1.79	2.95	6.89	2.53	4.14	8.54	4.25	3.18	2.19
chr1	981820	981908	chr1.capped.333	24	-	AT1G03860	0	proximal	UTR5	33.93	33.59	27.41	30.98	21.64	26.86	63.35	50.25	66.8
chr1	982613	982700	chr1.noncapped.334	30	-	AT1G03870	0	single-exon	CDS	1.85	4.35	2.37	1.99	3.82	3.55	4.18	2.07	1.18
chr1	983390	983552	chr1.capped.335	13	-	AT1G03870	0	single-exon	UTR5	11.35	11.37	17.57	7.58	12.02	20.32	58.16	70.27	31.97
chr1	985752	985778	chr1.capped.336	3	+	AT1G03880	0	proximal	UTR5	0	0	0	0.7	2.36	1.52	0	0	0
chr1	987534	988076	chr1.noncapped.337	87	+	AT1G03880	0	distal	CDS	0	0	0.11	1.35	4.55	2.77	0	0	0
chr1	991131	991244	chr1.capped.338	77	+	AT1G03900	0	proximal	UTR5	23.52	21.58	22.45	31	20.61	37.91	50.75	48.81	47.76
chr1	993398	993484	chr1.capped.339	1	+	AT1G03905	0	proximal	UTR5	1.48	1.38	1.99	2.87	2.06	2.44	3.39	3.04	3.9
chr1	996057	996149	chr1.capped.340	60	+	AT1G03910	0	proximal	UTR5	13.1	13.74	13.55	18.49	10.47	13.16	18.94	17.83	16.23
chr1	1001103	1001503	chr1.capped.341	219	+	AT1G03920	0	proximal	UTR5	1.87	3.73	2.44	2.66	2.37	8.2	0.9	6.06	2.27
chr1	1004655	1004843	chr1.capped.342	109	+	AT1G03930	0	proximal	UTR5	2.94	1.8	1.55	4.61	8.43	5.35	4.36	3.89	4.89
chr1	1005021	1005059	chr1.capped.343	32	+	AT1G03930	0	proximal	UTR5	0.64	0.35	0.15	0	0.52	0.21	0.77	0.53	1.1
chr1	1005090	1005147	chr1.capped.344	20	+	AT1G03930	0	proximal	UTR5	0.1	0.86	0.55	0.68	0.37	1.05	1.49	2.58	3.27
chr1	1005189	1005228	chr1.capped.345	6	+	AT1G03930	0	proximal	UTR5	0.05	0.29	0.83	0.62	0.49	0.46	0.91	0.98	1.48
chr1	1008479	1008631	chr1.capped.346	29	+	AT1G04217	-83	upstream	NC	5.19	3.35	5.1	3.86	3.61	9.38	6.66	10.91	11.01
chr1	1008806	1008811	chr1.noncapped.347	2	+	ENSRNA049495701-T1	0	single-exon	NC	10.42	2.7	1.69	1.32	0.21	0	1.72	1.45	0.87
chr1	1009039	1009096	chr1.noncapped.348	32	+	AT1G04223	-1	upstream	NC	1.65	1.18	2.41	0.07	0	0.07	1.8	2.51	0.58
chr1	1009202	1009241	chr1.noncapped.349	20	+	AT1G04227	-26	upstream	NC	2.2	0.75	1.64	0.06	0.52	0.19	0.4	0.67	0.78
chr1	1010690	1010920	chr1.noncapped.350	23	+	AT1G03940	0	antisense	CDS	0.14	0.21	0.53	1.39	0.26	1.32	0.3	0	0.2
chr1	1011194	1011211	chr1.noncapped.351	15	-	AT1G03950	0	distal	UTR3	0	0	0	0	0.46	0.91	0	0	0.08
chr1	1013227	1013453	chr1.capped.352	100	-	AT1G03950	0	proximal	UTR5	5.27	5.27	5.02	5.95	5.02	4.7	11.72	12.07	9.14
chr1	1013637	1013763	chr1.capped.353	82	+	AT1G03960	0	proximal	UTR5	1.93	2.13	1.13	2.47	1.92	0	3.16	1.58	3.36
chr1	1018098	1018217	chr1.capped.354	3	+	AT1G03970	0	single-exon	UTR5	8.03	6.57	10.79	4.91	10.38	17.81	10.19	14.69	12.26
chr1	1029104	1029119	chr1.capped.355	2	-	AT1G04000	0	single-exon	UTR5	11.09	8.82	9.16	11.07	10.07	13.46	8.27	13.23	8.81
chr1	1036108	1036240	chr1.capped.356	96	-	AT1G04010	0	proximal	UTR5	2.06	1.33	1.83	1.12	1.69	0.87	1.1	1.91	0.72
chr1	1036501	1036586	chr1.capped.357	32	+	AT1G04020	0	proximal	UTR5	2.95	3.64	2.39	3.95	0.99	2.35	4.69	4.12	2.9
chr1	1040377	1040598	chr1.capped.358	167	+	AT1G04030	0	proximal	UTR5	2.74	2.37	1.55	4.85	2.62	1.32	4.02	3.02	4.93
chr1	1043126	1043204	chr1.capped.359	15	-	AT1G04040	0	single-exon	CDS	2.84	2.17	1.29	2.95	1.29	1.31	3.47	4.4	5.91
chr1	1043855	1043866	chr1.capped.360	8	-	AT1G04040	0	single-exon	UTR5	15.84	8.76	7.7	13.96	5.94	10.43	33.75	25.59	27.03
chr1	1046868	1046902	chr1.capped.361	33	-	AT1G04050	-25	intron	CDS	0	0.61	0.73	0	0	0.86	0.82	0.26	0.87
chr1	1049202	1049471	chr1.capped.362	205	-	AT1G04050	0	proximal	UTR5	0.38	0.82	1.78	0.77	1.68	1.04	2.08	2.21	0.88
chr1	1049691	1049839	chr1.capped.363	78	-	AT1G04050	0	proximal	UTR5	1.28	2.32	1.99	1.22	2.2	1.08	0.88	2.03	1.65
chr1	1051119	1051189	chr1.capped.365	62	-	AT1G04070	0	single-exon	UTR5	17.71	20.3	20.43	20.45	24.1	15.1	45.97	39.86	28.66
chr1	1051289	1051421	chr1.capped.364	90	+	AT1G04080	0	proximal	UTR5	18.67	12.49	10.74	15.14	9.18	16.67	19.79	16.55	22.73
chr1	1056989	1057318	chr1.capped.366	146	+	AT1G04090	0	proximal	UTR5	0.72	0.94	1.06	1.11	0.79	2.18	0.9	2.6	1.58
chr1	1058674	1058701	chr1.capped.367	6	+	AT1G04090	0	distal	CDS	0.07	0.16	0.46	0.35	0	1.38	0.67	0.86	0.31
chr1	1059464	1059569	chr1.capped.368	3	+	AT1G04100	-2	upstream	UTR5	1.38	2.2	3.47	3.15	2.02	2.65	6.09	6.54	6.47
chr1	1061437	1061594	chr1.noncapped.369	69	-	AT1G04110	0	single-exon	CDS	1.89	1.15	0.82	0.4	0.29	0	0.21	0	3.56
chr1	1061813	1061958	chr1.noncapped.370	143	-	AT1G04110	0	single-exon	CDS	0.2	0.7	0.77	0.13	0	0	0.13	0.04	0.71
chr1	1063816	1063836	chr1.capped.371	14	-	AT1G04110	-22	upstream	UTR5	0.36	0.21	0.32	0.06	0.44	0.56	0.86	1.78	1.8
chr1	1064670	1064716	chr1.capped.372	8	-	AT1G04120	0	distal	UTR3	1.23	0.95	0.22	0.91	1.88	0.85	0.77	0.15	1.03
chr1	1065756	1065789	chr1.noncapped.373	16	-	AT1G04120	0	distal	CDS	0.15	0.61	0.09	0.28	0	0.26	1.06	0.11	1.5
chr1	1069464	1069466	chr1.noncapped.374	1	+	AT1G04120	0	antisense	CDS	0.44	0.96	0.78	0.38	0.43	0.88	0.16	0	0
chr1	1070815	1071063	chr1.capped.375	111	-	AT1G04120	0	proximal	UTR5	5.78	3.55	3.2	2.94	3.72	2.63	6.32	6.1	6.56
chr1	1073073	1073171	chr1.noncapped.376	41	+	AT1G04130	-159	upstream	UTR5	0	0.16	0.21	0.6	1.51	0.24	0.05	0.5	0.08
chr1	1073252	1073459	chr1.capped.377	166	+	AT1G04130	0	proximal	UTR5	5.8	6.94	6.53	7.29	4.34	11.63	11.75	12.56	16.1
chr1	1080422	1080619	chr1.capped.378	111	-	AT1G04140	0	proximal	UTR5	11.04	14.03	10.6	12.5	9.91	9.8	15.92	18.82	14.43
chr1	1086152	1086276	chr1.capped.379	6	+	AT1G04160	-11	upstream	UTR5	1.79	0.71	1.08	1.18	3.31	2.51	1.79	1.34	0.4
chr1	1096942	1097112	chr1.capped.380	92	+	AT1G04170	0	proximal	UTR5	31.88	24.82	20.21	48.67	24.56	28.01	41.14	36.47	38.39
chr1	1108541	1108731	chr1.capped.381	117	-	AT1G04190	0	proximal	UTR5	19.44	17.03	16.33	24.27	18.46	13.45	25.91	21.08	28.78
chr1	1109411	1109558	chr1.capped.382	70	+	AT1G04200	0	proximal	UTR5	3.53	2.77	3.9	5.32	1.88	2.28	5.02	5.11	7.86
chr1	1114264	1114484	chr1.capped.383	140	+	AT1G04210	0	proximal	UTR5	4.78	4.09	5.22	5.3	4.11	5.04	3.77	2.54	2.36
chr1	1119468	1119501	chr1.noncapped.384	24	+	AT1G04210	0	distal	UTR3	0.2	0.33	0.43	0.1	0	0	1.63	0.73	0.39
chr1	1121605	1121693	chr1.capped.385	48	+	AT1G04247	0	single-exon	NC	0.93	0.78	1	1.15	0.44	0.77	1.19	1.1	2.12
chr1	1122413	1122486	chr1.capped.386	56	-	AT1G04220	0	single-exon	CDS	8.18	7.47	7.3	7.58	7.34	9.9	11.31	12.49	9.47
chr1	1122516	1122590	chr1.capped.387	68	-	AT1G04220	0	single-exon	UTR5	9.57	11.52	15.86	13.31	17.06	13.32	12.82	14.16	12.79
chr1	1125456	1125597	chr1.capped.388	93	+	AT1G04230	0	proximal	UTR5	4.33	4.33	3.87	5.08	3.71	5.59	11.21	7.9	10.79
chr1	1129315	1129536	chr1.capped.389	99	-	AT1G04240	0	proximal	CDS	9.41	7.87	10.51	6.48	9.22	11.77	28.11	24.41	17.9
chr1	1136256	1136353	chr1.capped.390	43	+	AT1G04250	0	proximal	UTR5	6.46	5.55	6.04	13.49	5.87	12.1	7.25	7.79	8.66
chr1	1140443	1140456	chr1.capped.391	3	+	AT1G04260	0	antisense	UTR3	0.23	0.42	0.35	0.32	0	1.15	0	1.2	0.7
chr1	1141303	1141374	chr1.capped.392	61	-	AT1G04260	0	single-exon	UTR5	17.06	16.4	19.08	22.58	22.41	19.11	50.04	56.1	57.09
chr1	1143036	1143055	chr1.capped.393	14	-	AT1G04270	0	proximal	UTR5	412.46	498	471.97	433.9	391.64	367.8	621.41	482.05	221.48
chr1	1144387	1144401	chr1.noncapped.394	13	-	AT1G04280	0	distal	CDS	0.1	0	0	0	0.8	0.68	0.13	0	0.16
chr1	1145698	1145911	chr1.capped.395	10	-	AT1G04280	0	distal	CDS	0.64	2.36	2.39	0.18	1	1.29	1.72	5.05	2.91
chr1	1146340	1146568	chr1.capped.396	3	-	AT1G04280	0	proximal	CDS	1.8	1.89	2.2	1.02	0.79	1.49	2.06	4.41	2.52
chr1	1146617	1146717	chr1.capped.397	67	-	AT1G04280	0	proximal	UTR5	1.5	4.26	3.1	2.02	4.19	2.86	3.82	6.71	5.56
chr1	1147907	1147916	chr1.noncapped.398	4	+	AT1G04295	0	single-exon	NC	0.16	0.05	0.45	0.68	0	0.48	0.67	0.71	0.32
chr1	1148296	1148590	chr1.capped.399	85	-	AT1G04290	0	proximal	UTR5	30.53	28.64	37.42	41.66	60.08	51.85	52.81	80.28	75.95
chr1	1148747	1148801	chr1.noncapped.400	20	-	AT1G04300	0	distal	UTR3	0.72	0.52	1.12	0.36	1.12	1.65	0	0.18	0.56
chr1	1148866	1148890	chr1.noncapped.401	18	-	AT1G04300	0	distal	CDS	0.26	0.56	0.07	0.08	1.21	1.46	0.4	0.34	0
chr1	1154536	1154756	chr1.capped.402	44	-	AT1G04300	0	proximal	UTR5	2.33	5.63	3.79	3.28	4.6	2.37	4.57	6.09	4.07
chr1	1157572	1157838	chr1.capped.403	192	-	AT1G04310	0	proximal	UTR5	0.6	1.44	1.42	1.26	1.05	0.56	2.46	5.97	4.17
chr1	1161884	1161921	chr1.capped.404	34	-	AT1G04330	0	single-exon	UTR5	0.23	0.36	0.32	0.42	0.69	0.48	0.66	0.63	0.95
chr1	1164733	1164880	chr1.capped.405	83	-	AT1G04340	0	proximal	UTR5	22.37	30.52	26.48	33.96	30.41	25.78	65.98	61.52	57.7
chr1	1165068	1165288	chr1.capped.406	176	+	AT1G04350	0	proximal	UTR5	6.64	6.2	7.29	9.44	4.94	11.28	20.07	26.51	27.85
chr1	1167026	1167119	chr1.capped.407	40	-	AT1G04350	0	antisense	UTR3	0.1	0.27	0.32	0.32	0	0.31	0.82	0.46	0.55
chr1	1183631	1183740	chr1.capped.408	18	-	AT1G04390	0	proximal	UTR5	0.56	1.04	0.76	0.27	0	0.3	1.69	2.15	0.63
chr1	1188215	1188568	chr1.capped.409	125	-	AT1G04400	0	proximal	UTR5	16.77	18.15	14.15	13.41	10.35	9.36	19.74	31.53	18.05
chr1	1191313	1191389	chr1.capped.411	35	-	AT1G04410	0	proximal	UTR5	146.08	152.26	107.49	125.95	77.68	90.75	231.12	185.24	182.09
chr1	1191586	1191619	chr1.capped.410	26	+	AT1G04420	0	proximal	UTR5	18.62	16.77	14.51	22.87	10.98	20.04	38.78	21.51	42.16
chr1	1194165	1194192	chr1.capped.412	4	+	AT1G04425	-17	upstream	NC	2.11	2.69	1.68	2.29	3.3	2.2	3.2	1.24	3.44
chr1	1198056	1198297	chr1.capped.413	204	+	AT1G04430	0	proximal	UTR5	27.43	18.62	17.3	32.24	13.47	25.92	24.57	27.4	27.03
chr1	1198543	1198802	chr1.capped.414	73	+	AT1G04430	0	proximal	UTR5	1.49	1.62	1.19	2.42	0.22	1.38	1.87	1.63	1.26
chr1	1202183	1202409	chr1.capped.415	100	+	AT1G04440	0	proximal	UTR5	5.29	5.65	4.56	8.72	2.65	6.89	15.92	20.01	21.32
chr1	1208545	1208784	chr1.capped.416	134	+	AT1G04450	-1	intron	UTR5	3.44	6.37	6.43	6.25	9.01	13.19	2.5	12.17	3.84
chr1	1214590	1214801	chr1.capped.417	71	-	AT1G04470	0	proximal	UTR5	1.69	13.52	4.75	1.77	5.23	4.32	0.4	8.22	0.4
chr1	1215806	1215837	chr1.capped.418	25	-	AT1G04263	-1	upstream	NC	2.57	0.71	1.96	1.62	4.13	1.58	1.54	1.11	0.51
chr1	1216053	1216112	chr1.capped.419	44	+	AT1G04480	0	proximal	UTR5	78.78	63.17	72.13	210.46	61.5	84.99	90.97	73.36	117.74
chr1	1216918	1216996	chr1.noncapped.420	1	+	AT1G04277	-1	upstream	NC	3.62	1.93	1.55	0.51	3.74	2.67	2.3	0.98	0.94
chr1	1224488	1224542	chr1.capped.421	20	-	AT1G04500	0	proximal	UTR5	1.66	1.2	1.79	2.02	0.34	2.6	2.11	7.99	1.18
chr1	1226554	1226643	chr1.capped.422	20	+	AT1G04510	0	proximal	UTR5	10	10.5	8.86	11.12	7.01	11.08	17.65	12.76	12.94
chr1	1231473	1231678	chr1.capped.423	152	+	AT1G04520	0	proximal	UTR5	10.14	6.85	7.23	11.67	7.06	10.77	12.58	12.23	13.67
chr1	1231734	1231746	chr1.capped.424	9	+	AT1G04520	0	proximal	UTR5	0.21	0.65	0.96	0.16	0.44	0.39	0.81	0.62	0.55
chr1	1235881	1236110	chr1.capped.425	73	-	AT1G04530	0	proximal	UTR5	16.62	25.9	31.58	17.66	27.13	26.99	63.75	61.44	71.37
chr1	1236878	1236958	chr1.noncapped.426	79	-	AT1G04540	0	antisense	UTR5	0	0.17	0	0.6	0.77	0	0.08	0.53	0.78
chr1	1237027	1237182	chr1.capped.427	116	+	AT1G04540	0	single-exon	UTR5	6.55	23.86	13.48	8.65	17.12	29.41	2.79	17.91	2.27
chr1	1240332	1240504	chr1.capped.428	86	+	AT1G04550	0	proximal	UTR5	8.59	7.71	11.87	9.07	5.53	9.7	15.41	16.06	17.46
chr1	1242538	1242809	chr1.capped.429	166	+	AT1G04555	0	proximal	UTR5	7.86	5.38	7.31	6.22	4.39	11.29	7.46	12.49	11.75
chr1	1246639	1246735	chr1.capped.430	63	+	AT1G04570	0	antisense	UTR3	0	0.26	0.18	0.13	0	0	0.67	0.62	0.24
chr1	1248717	1248847	chr1.capped.431	76	-	AT1G04570	0	proximal	UTR5	1.01	1.4	0.76	0.71	0.62	1.86	1.85	1.53	1.27
chr1	1252308	1252442	chr1.noncapped.432	90	-	AT1G04580	0	distal	CDS	0.24	0.31	1.17	0.66	2.15	1.45	0.28	0.09	0
chr1	1257670	1257748	chr1.capped.433	35	-	AT1G04580	0	proximal	UTR5	0.14	0.26	0.29	0.08	0.4	0.37	0.73	0.55	0.71
chr1	1261380	1261468	chr1.capped.434	43	-	AT1G04590	0	proximal	UTR5	9.53	11.34	10.28	9.77	8.04	8.82	20.22	16.18	16.15
chr1	1261751	1261893	chr1.noncapped.435	19	+	AT1G04600	0	proximal	UTR5	0.26	0.54	0.08	0	1	0.79	0.27	1.15	0.16
chr1	1279322	1279394	chr1.capped.436	65	+	AT1G04610	0	proximal	UTR5	0.18	0.1	0.54	0.65	0	1.19	0.2	0.08	0.08
chr1	1286475	1286607	chr1.capped.437	84	-	AT1G04620	0	proximal	UTR5	1.24	0.81	0.12	0.83	0.81	0.81	0.84	1.64	1.88
chr1	1291010	1291104	chr1.capped.439	67	-	AT1G04630	0	proximal	UTR5	28.59	39.13	37.19	34.72	30.31	26.67	56.38	52.87	60.96
chr1	1291296	1291337	chr1.capped.438	3	+	AT1G04635	0	single-exon	UTR5	2	4.29	5.11	5.72	3.07	2.29	5.58	6.56	4.83
chr1	1292036	1292145	chr1.capped.440	74	+	AT1G04635	0	single-exon	UTR3	15.17	10.08	11.71	16.78	11.26	8.65	16.75	15.01	10.91
chr1	1294255	1294325	chr1.capped.441	7	-	AT1G04645	0	single-exon	UTR5	0.96	1.5	2.48	1.24	2.63	0.74	5.25	14.71	2.1
chr1	1300501	1300997	chr1.noncapped.442	49	-	AT1G04660	0	single-exon	UTR3	1.34	3.19	4.76	8.25	26.14	8.39	4.3	0.55	0.88
chr1	1301023	1301093	chr1.noncapped.443	57	-	AT1G04660	0	single-exon	CDS	0.31	0.2	0.08	0.24	1.22	0.76	0	0.29	0
chr1	1301355	1301423	chr1.capped.444	6	-	AT1G04660	0	single-exon	UTR5	1.69	0.65	2.35	3.3	20.43	4.43	3.53	1.75	4.84
chr1	1301859	1301915	chr1.capped.445	4	+	AT1G04670	0	proximal	UTR5	11.58	8.39	20.73	16.14	13.55	37.4	13.64	39.7	19.03
chr1	1307833	1307910	chr1.capped.446	48	-	AT1G04680	0	proximal	UTR5	47.81	48.2	43.54	53.09	28.04	31.52	39.98	47.54	55.19
chr1	1310053	1310064	chr1.capped.447	3	-	.	.	intergenic	.	0.1	0	0	0.68	0.57	0	0.07	0	0
chr1	1313558	1313657	chr1.capped.448	24	+	AT1G04690	0	proximal	UTR5	37.01	29.44	26.51	33.06	15.49	43.46	36.45	34.07	43.2
chr1	1316075	1316320	chr1.capped.449	183	+	AT1G04700	0	proximal	UTR5	1.44	2.21	1.23	1.47	3.27	4.53	0.51	2.66	0.32
chr1	1321902	1321974	chr1.capped.450	6	+	AT1G04710	0	proximal	UTR5	7.04	6.19	5.16	8.53	6.75	9.44	22.93	12.65	16.92
chr1	1331060	1331166	chr1.capped.451	100	-	AT1G04730	0	proximal	UTR5	2.4	1.47	1.19	2.58	2.06	1.53	2.09	0.82	1.02
chr1	1333483	1333567	chr1.capped.452	26	-	AT1G04750	0	proximal	UTR5	71.38	87.48	66.19	78.45	60.77	72.94	189.49	166.42	181.39
chr1	1334505	1334784	chr1.capped.453	182	+	AT1G04760	0	proximal	UTR5	7.16	7.23	8.99	10.52	6.69	14.01	7.05	20.16	10.81
chr1	1336316	1336318	chr1.noncapped.454	1	-	AT1G04770	0	single-exon	UTR3	0.15	0.56	3.61	0	0	0.44	0.14	2.28	1.17
chr1	1337829	1337849	chr1.capped.455	19	-	AT1G04770	0	proximal	UTR5	10.72	13.17	23.99	14.94	19.38	15.73	8.1	14.36	15.05
chr1	1339698	1339835	chr1.capped.456	1	+	AT1G04778	0	proximal	UTR5	0.36	0.43	0.1	0.26	0.66	0.54	0	0.54	0.87
chr1	1340744	1340825	chr1.noncapped.457	12	-	AT1G04780	0	distal	UTR3	0.85	0.92	0.68	1.73	2.56	1.39	1.2	0.95	0.16
chr1	1340999	1341018	chr1.noncapped.458	16	-	AT1G04780	0	distal	CDS	1.1	1.04	0.5	0.19	0.45	0.25	0.5	0	0
chr1	1343529	1343758	chr1.capped.459	148	-	AT1G04780	0	proximal	UTR5	9.86	6.03	7.04	5.53	3.99	6.78	6.56	8.49	6.74
chr1	1344980	1345097	chr1.capped.460	59	+	AT1G04790	0	proximal	UTR5	6.33	6.06	6.68	5.81	3.51	6.12	11.15	9.61	11.16
chr1	1348750	1348805	chr1.noncapped.461	39	-	AT1G04800	0	single-exon	CDS	2.67	5.19	6.12	2.24	3.53	2.2	4.96	4.03	4.47
chr1	1349298	1349305	chr1.capped.462	6	-	AT1G04800	0	single-exon	UTR5	27.24	21.81	18.14	30.52	13.96	27.52	37.78	50.69	46.9
chr1	1350143	1350240	chr1.capped.463	46	+	AT1G04810	0	proximal	UTR5	5.57	7.49	5.22	7.35	2.46	7.12	13.43	9.55	16.85
chr1	1358284	1358379	chr1.capped.464	90	-	AT1G04820	0	proximal	UTR5	177.56	215.24	127.81	190.34	115.36	143.69	362.02	420.34	898.59
chr1	1361884	1362025	chr1.capped.465	94	-	AT1G04830	0	proximal	UTR5	6.39	5.12	5.73	4.58	2.55	4.8	10.89	9.48	6.98
chr1	1364832	1364992	chr1.capped.466	157	-	AT1G04840	0	proximal	UTR5	0.99	0.21	0.87	0.15	0.34	0.1	0.3	0.75	0.94
chr1	1365397	1365442	chr1.noncapped.467	43	-	AT1G04850	0	distal	CDS	1.49	2.59	0.93	2.2	5.02	3.06	1.1	0.69	0.63
chr1	1368313	1368494	chr1.capped.468	90	-	AT1G04850	0	proximal	CDS	0.61	0.92	0.85	0.73	0.54	0.75	1.71	1.27	1.5
chr1	1368731	1368802	chr1.capped.469	55	-	AT1G04850	0	proximal	UTR5	36.87	46.9	47.12	59.1	43.58	51.08	86.72	80.52	83.69
chr1	1373014	1373139	chr1.capped.470	62	-	AT1G04860	0	proximal	UTR5	4.62	3.73	4.64	3.36	0.93	5.12	4.26	6.1	2.5
chr1	1375708	1375771	chr1.capped.471	7	-	AT1G04870	0	proximal	UTR5	14.37	16.32	14.75	17.9	11.77	15.34	25.31	16.7	26.67
chr1	1379108	1379313	chr1.capped.472	131	-	AT1G04880	-12	upstream	UTR5	2.44	4.41	4.92	2.71	6.15	5.37	0.93	7.57	2.52
chr1	1383048	1383181	chr1.capped.473	72	-	AT1G04293	-62	upstream	NC	1.12	2.86	4.67	2.46	2.42	5.46	0.49	6.12	1.57
chr1	1383779	1383960	chr1.capped.474	74	+	AT1G04900	0	proximal	UTR5	5.6	5.07	5.02	6.78	3.59	2.69	6.45	6.09	4.95
chr1	1389603	1389631	chr1.noncapped.475	21	-	AT1G04910	0	distal	CDS	0	0.04	0	0.5	0	0	0.65	0.08	1.1
chr1	1391049	1391278	chr1.capped.476	138	-	AT1G04910	0	proximal	UTR5	6.71	7.55	4.29	7.72	1.95	5.21	7.19	7.12	7.05
chr1	1395836	1395973	chr1.capped.477	27	-	AT1G04920	0	proximal	UTR5	0.4	0.35	0.22	0.13	0	0.54	0.89	0.67	0.87
chr1	1398992	1399079	chr1.capped.478	53	-	AT1G04930	0	proximal	UTR5	1.47	1.97	2.07	2.32	0.52	2.25	5.53	4.14	6.32
chr1	1399182	1399271	chr1.capped.479	52	+	AT1G04940	0	proximal	UTR5	23.37	24.8	23	41.76	15.15	36	28.22	21.65	38.52
chr1	1400862	1401031	chr1.capped.480	78	+	AT1G04945	0	proximal	CDS	2.47	2.23	2.75	3.52	1.27	3.72	3.14	3.25	3.91
chr1	1407478	1407520	chr1.capped.481	18	-	AT1G04950	0	proximal	UTR5	5.34	6.63	4.4	7.42	4.54	4.87	7.14	12.41	9.44
chr1	1410671	1410911	chr1.capped.482	67	-	AT1G04960	0	proximal	UTR5	5.63	7.45	6.72	6.95	7.91	7.18	22.59	23.7	21.54
chr1	1411165	1411190	chr1.capped.483	13	+	AT1G04970	0	proximal	UTR5	4.42	5.42	5.75	6.32	3.41	6.92	22.97	27.82	16.91
chr1	1416118	1416163	chr1.capped.484	36	-	AT1G04980	0	proximal	UTR5	5.5	5.82	5.16	8.87	8.51	7.14	13.43	14.44	19.34
chr1	1418331	1418490	chr1.capped.485	109	-	AT1G04985	0	proximal	UTR5	17.4	16.21	18.78	27.2	14.98	16.55	29.39	32.12	29.77
chr1	1418614	1418704	chr1.capped.486	36	+	AT1G04990	0	antisense	UTR3	1.03	0.55	0.88	1.09	2.2	3.81	1.34	0.49	0.24
chr1	1418900	1419092	chr1.capped.487	80	-	AT1G04985	0	proximal	UTR5	0.35	0.87	0.61	0.32	0.62	0.48	0.8	1.18	1.19
chr1	1421525	1421867	chr1.capped.488	116	-	AT1G04990	0	proximal	UTR5	8.29	9.07	4.11	11.8	9.93	7.18	10.52	13.84	16.17
chr1	1425499	1425606	chr1.capped.489	90	+	AT1G05000	0	proximal	UTR5	0.33	0.5	0.77	0.91	0.66	1.26	1.32	1.66	1.71
chr1	1427714	1427862	chr1.capped.490	120	+	AT1G05000	0	distal	CDS	0	0.14	0.5	0.22	0.61	0.87	0.4	0.35	0.86
chr1	1427953	1428216	chr1.capped.491	134	+	AT1G05000	0	distal	CDS	0.35	1.33	1.89	0.32	1.28	0.94	2.28	3.71	2.13
chr1	1431592	1431670	chr1.noncapped.492	31	-	AT1G05010	0	distal	CDS	0.65	2.04	1.43	0.62	0.22	0.35	0.75	0.57	0.4
chr1	1431804	1431928	chr1.noncapped.493	36	-	AT1G05010	0	distal	CDS	0.86	1.76	1.71	0.64	0	0.49	0.27	0.4	0.32
chr1	1432666	1432901	chr1.capped.494	92	-	AT1G05010	0	proximal	UTR5	5.11	4.95	4.64	6.34	13.17	6.33	7.3	17.53	12.04
chr1	1437334	1437552	chr1.capped.495	159	-	AT1G05020	0	single-exon	UTR5	1.31	2.02	1.62	0.55	1.04	0.54	0.91	3.36	0.8
chr1	1438230	1438306	chr1.noncapped.496	18	-	AT1G05030	0	distal	UTR3	0.48	0.11	0.3	0.73	0	0	0.87	0.29	0.55
chr1	1441264	1441474	chr1.capped.497	175	-	AT1G05030	0	proximal	UTR5	2.88	1.51	1.58	2.78	0.16	1.68	2.95	2.88	1.64
chr1	1448449	1448506	chr1.capped.498	53	-	AT1G05040	-40	upstream	UTR5	0.2	0.44	2	0	1.04	0.63	0.61	1.47	1.25
chr1	1450827	1450913	chr1.capped.499	28	-	AT1G05055	0	proximal	UTR5	4.56	4.92	4.16	4.82	3.53	6.17	10.07	8.16	8.42
chr1	1452819	1453042	chr1.capped.500	52	-	AT1G05060	0	proximal	UTR5	8.31	10.26	8.48	9.65	10.38	11.46	21.36	27.52	24.96
chr1	1455175	1455333	chr1.capped.501	140	-	AT1G05065	0	single-exon	UTR5	19.6	8.96	6.82	32.89	29.15	14.35	8.77	8.1	8.7
chr1	1458552	1458756	chr1.capped.502	111	-	AT1G05070	0	proximal	UTR5	20.66	18.88	20.3	27.55	18.62	22.11	55.39	40.04	47.61
chr1	1463084	1463174	chr1.capped.503	26	+	AT1G05087	0	single-exon	UTR5	1.86	1.63	1.55	2.87	1.45	1.91	1.91	2.18	1.63
chr1	1468846	1468848	chr1.noncapped.504	1	+	.	.	intergenic	.	0.99	0.15	0	1.51	12.04	2.64	0.05	0	0
chr1	1469600	1469610	chr1.capped.505	3	+	AT1G05100	0	single-exon	UTR5	1.44	1.65	1.31	3.57	2.23	5.34	4.04	9.79	10.06
chr1	1471602	1471651	chr1.noncapped.506	42	-	AT1G05120	0	distal	CDS	0.61	0.28	0.51	0.17	0.37	0.09	0	0.16	0.4
chr1	1476034	1476298	chr1.capped.507	60	-	AT1G05120	0	proximal	CDS	7.6	7.87	7.13	6.95	4.48	3.47	9.45	9.56	5.46
chr1	1477527	1477653	chr1.noncapped.508	38	-	.	.	intergenic	.	0.91	0.68	1.11	2.01	4.21	1.01	0.57	0.89	0.24
chr1	1477673	1478062	chr1.noncapped.509	137	-	.	.	intergenic	.	1.03	3.45	4.36	3.68	6.51	4.79	3.63	1.59	2.14
chr1	1478872	1478913	chr1.capped.510	6	-	.	.	intergenic	.	1.48	0.7	1.41	0.67	0.59	1.65	0.58	1.16	1.73
chr1	1482512	1482719	chr1.capped.511	79	+	AT1G05140	0	single-exon	UTR5	7.98	9.25	9.27	11.75	7.05	8.21	18.41	18.52	22.62
chr1	1486823	1487097	chr1.capped.512	108	-	AT1G05150	0	single-exon	UTR5	7.97	9.3	8.36	7.21	5.81	5.48	13.48	13.05	14.3
chr1	1490782	1490971	chr1.capped.513	126	-	AT1G05160	0	proximal	UTR5	5.47	8.19	5.69	6.2	4.31	9.91	20.36	15.69	18.35
chr1	1494175	1494248	chr1.capped.514	64	-	AT1G05170	0	proximal	UTR5	5.23	6.63	4.87	5	4.02	5.12	14.21	20.51	19.95
chr1	1501731	1501878	chr1.capped.515	86	-	AT1G05180	0	proximal	UTR5	6.36	7.8	3.79	6.48	5.41	2.5	14.97	11.64	16.15
chr1	1503753	1503834	chr1.capped.516	70	-	AT1G05190	0	proximal	UTR5	87.95	105.94	95.19	99.42	77.47	74.13	172.57	135.99	181.24
chr1	1504907	1505076	chr1.capped.517	113	+	AT1G05200	0	proximal	UTR5	1.21	1.02	0.59	0.78	0	1.39	1.52	1.46	0.8
chr1	1510256	1510285	chr1.capped.519	24	-	AT1G05205	0	single-exon	UTR5	47.47	53.28	52.64	87.58	57.01	59.21	124.27	84.55	93.33
chr1	1510403	1510433	chr1.capped.518	15	+	AT1G05210	0	proximal	UTR5	8.79	9.37	7.45	14.82	13	15.84	24.44	9.32	23.15
chr1	1517175	1517361	chr1.capped.520	82	-	AT1G05230	0	proximal	UTR5	0.21	0.2	0.67	0.1	0	1.22	0.46	1.05	1.19
chr1	1518637	1518875	chr1.capped.521	164	-	AT1G05230	0	proximal	UTR5	1.3	2.12	2.71	1.56	1.51	1.38	1.87	1.96	3.21
chr1	1520501	1520539	chr1.capped.522	36	-	AT1G05240	0	antisense	UTR5	0	0.3	0	0	1.41	0.62	0	0	0
chr1	1523635	1523702	chr1.capped.523	28	+	AT1G04363	0	proximal	NC	2.97	1.51	1.88	5.37	2.91	2.01	7.09	5.33	6.14
chr1	1524045	1524066	chr1.capped.524	8	-	AT1G04357	0	single-exon	NC	0	0.18	0.16	0.7	0	0.1	0.58	0.05	1.01
chr1	1529763	1529775	chr1.capped.525	4	+	AT1G05260	0	proximal	UTR5	0.83	1.89	1.88	1.35	0.51	0.43	1.87	2.93	2.26
chr1	1531028	1531059	chr1.noncapped.526	2	+	AT1G05260	0	distal	CDS	0.3	0.74	0.88	0.49	0	0	0.25	0.93	0
chr1	1534304	1534441	chr1.capped.527	85	-	AT1G05270	0	proximal	UTR5	8.87	9.94	8.33	7.2	6.61	6.26	13.24	16.33	11.49
chr1	1540597	1540653	chr1.capped.528	53	-	AT1G05290	-89	upstream	UTR5	0.02	0.13	0.49	0.11	0	0.17	0.99	0.18	0.63
chr1	1552409	1552521	chr1.capped.529	104	-	AT1G05310	0	proximal	UTR5	0.37	0.66	0.09	0.38	0	0	0.3	1.15	1.02
chr1	1553545	1553741	chr1.capped.530	57	+	AT1G05320	0	proximal	UTR5	5.6	4.74	3.59	9.71	4.58	3.94	5.28	5.16	3.2
chr1	1554760	1554886	chr1.capped.531	71	+	AT1G05320	0	proximal	UTR5	0.39	0.34	0.54	0	1.84	1.6	0.76	0.74	0.56
chr1	1558069	1558127	chr1.capped.532	32	+	AT1G05330	0	single-exon	UTR5	0.6	0.42	1.7	0.5	0.71	0.65	0.72	0.98	0.87
chr1	1559750	1559782	chr1.capped.533	5	-	AT1G05340	0	proximal	UTR5	2.64	4.63	2.05	3.17	1.9	5.03	3.04	5.19	11.71
chr1	1564041	1564159	chr1.capped.534	38	-	AT1G05350	0	proximal	UTR5	11.92	10.88	8.38	11.24	5.16	11.07	28.44	20.73	24.95
chr1	1564493	1564704	chr1.capped.535	115	+	AT1G05360	0	proximal	UTR5	8.36	7.1	7.47	8.65	3.41	7.76	9.1	13.68	14.12
chr1	1572456	1572491	chr1.capped.536	12	-	AT1G05370	0	proximal	UTR5	0	0.67	0.36	0.15	0	0	0.39	0.67	1.49
chr1	1576853	1576887	chr1.capped.537	5	+	AT1G05380	0	proximal	UTR5	6.1	6.59	3.51	5.38	2.87	7.79	4.88	5.54	5.08
chr1	1583646	1583690	chr1.capped.538	15	-	AT1G05385	0	proximal	UTR5	16.77	16.4	14.37	19.42	11.55	11.2	27.37	24.28	32.4
chr1	1584069	1584116	chr1.capped.539	3	+	AT1G05400	0	proximal	UTR5	0.24	0.3	0.78	0.63	0.24	0.78	0.92	0.93	0.71
chr1	1585204	1585282	chr1.noncapped.540	77	+	AT1G05400	0	distal	UTR3	0	0.06	0	0	0	0	0.46	0.54	0
chr1	1587615	1587817	chr1.capped.541	114	-	AT1G05410	0	proximal	UTR5	4.57	4.68	7.13	3.86	4.93	3.92	11.58	9.92	12.45
chr1	1589988	1590101	chr1.capped.542	57	+	AT1G05420	0	single-exon	CDS	5.43	5.49	3.61	4.58	5.69	6.1	6.44	4.73	6.49
chr1	1590875	1590877	chr1.noncapped.543	1	-	AT1G05420	0	antisense	UTR3	0.09	0.77	0.76	0.04	0	0	0.26	0.61	1.01
chr1	1595757	1595866	chr1.capped.544	25	-	AT1G05430	0	proximal	UTR5	11.28	11.47	12.18	14.46	11.2	11.13	27.9	26.14	18.1
chr1	1597781	1597926	chr1.capped.545	102	-	AT1G05440	0	proximal	UTR5	2.28	3.91	2.43	2.84	3.39	1.48	8.91	6.58	10.53
chr1	1599907	1600000	chr1.capped.546	24	+	AT1G05450	0	proximal	UTR5	2.35	2.79	4.94	3.27	2.36	7.16	4.28	6.51	5.27
chr1	1600443	1600504	chr1.capped.547	10	+	AT1G05450	0	proximal	CDS	0.12	0.3	0.5	0.32	0.59	0.92	0.06	0.56	0.23
chr1	1604947	1605040	chr1.capped.548	92	-	AT1G05460	-6	upstream	UTR5	1.19	1.21	1.03	0.52	1.03	0.38	2.21	3.38	1.79
chr1	1607425	1607505	chr1.noncapped.549	10	-	AT1G05470	0	distal	UTR3	0.08	0.34	0.57	0.8	0.63	0.68	0.55	0.07	0.4
chr1	1611370	1611462	chr1.capped.550	1	-	AT1G05470	0	proximal	UTR5	0.6	0.57	0.07	0.06	0.34	0	1.2	0.76	0.88
chr1	1611502	1611858	chr1.capped.551	62	-	AT1G05470	0	proximal	UTR5	3.64	3.95	3.18	6.8	4.47	4.48	5.29	3.7	2.84
chr1	1623231	1623576	chr1.capped.552	219	-	AT1G05490	0	proximal	UTR5	1.96	3.3	4.09	2.72	3.19	4.2	7.16	2.64	2.7
chr1	1624913	1625083	chr1.capped.553	104	+	AT1G05500	0	proximal	UTR5	7.13	7.39	5.1	11.43	3.44	7.28	13.1	13.49	18.74
chr1	1635381	1635383	chr1.noncapped.554	1	+	AT1G05520	0	antisense	CDS	2.12	3.11	4.61	2.97	4.01	10.67	0.35	0.81	0.08
chr1	1635721	1635894	chr1.capped.555	84	-	AT1G05520	0	proximal	UTR5	8.38	9.43	11.81	7.32	5.59	7.25	5.84	7.57	4.95
chr1	1639192	1639404	chr1.capped.556	96	+	AT1G05540	0	proximal	UTR5	4.14	5.87	6.6	6.07	2.68	8.46	17.31	16.41	15.86
chr1	1642589	1642829	chr1.capped.557	64	-	AT1G05550	0	proximal	CDS	0.23	0.31	0.44	0.79	1.16	0.17	2.74	2.06	3.46
chr1	1643871	1644132	chr1.capped.558	17	-	AT1G05550	0	proximal	UTR5	24.13	48.95	56.77	29.33	52.09	44.34	70.68	31.25	17.72
chr1	1645699	1645840	chr1.capped.559	109	+	AT1G05562	0	single-exon	NC	2.42	2.95	2.17	3.15	2.05	2.62	4.52	5.42	3.37
chr1	1647073	1647169	chr1.capped.560	73	-	AT1G05560	0	single-exon	CDS	6.38	5.35	7.23	5.54	5.72	7.31	6.58	9.82	5.41
chr1	1659284	1659482	chr1.capped.561	156	-	AT1G05570	0	proximal	UTR5	2.27	2.57	2.59	1.48	0.96	1.73	3.88	3.24	1.17
chr1	1664396	1664808	chr1.capped.562	38	-	AT1G05577	-37	upstream	UTR5	0.35	0.45	2.16	0.53	3.92	2.08	0.91	2.47	0.87
chr1	1668848	1668936	chr1.capped.563	51	-	AT1G05580	0	proximal	UTR5	4.75	26.23	8.84	2.81	4.59	7.88	0.3	9.93	1.11
chr1	1669345	1669556	chr1.capped.564	4	+	AT1G05590	0	proximal	UTR5	5.07	4.48	4.05	8.17	1.3	3.22	8.76	7.53	14.21
chr1	1671284	1671312	chr1.noncapped.565	14	+	AT1G05590	0	distal	CDS	0.26	0.54	0.62	0	0	0	0.11	0	0
chr1	1671899	1671995	chr1.capped.566	26	+	AT1G05600	0	proximal	UTR5	0.99	1.66	2.07	1.79	0.72	1.73	3.76	2.27	3.75
chr1	1675994	1676091	chr1.capped.567	50	-	AT1G05610	0	proximal	UTR5	0.33	0.24	0.22	0	0.51	0	1.01	0.36	0.64
chr1	1678946	1679246	chr1.capped.568	219	+	AT1G05620	0	proximal	UTR5	13.44	8.61	5.85	13.9	4.71	12.83	16.67	16.34	29.23
chr1	1682122	1682516	chr1.capped.569	104	+	AT1G05630	0	proximal	UTR5	2.46	1.71	2.24	1.92	1.71	2.15	1.02	2.4	1.81
chr1	1689716	1689886	chr1.capped.570	53	-	AT1G05640	0	proximal	UTR5	0.53	0.64	0.4	0.66	0	0.05	1.21	0.78	0.56
chr1	1700947	1701086	chr1.capped.571	68	-	AT1G05670	0	proximal	UTR5	0.09	0.79	0.24	0.69	0	0.77	0.97	1.28	1.58
chr1	1703279	1703343	chr1.noncapped.572	39	-	AT1G05680	0	distal	CDS	1.02	0.68	1.04	0.99	0	0.27	0.82	0.38	0.48
chr1	1704575	1704695	chr1.capped.573	115	-	AT1G05680	0	proximal	UTR5	4.92	4.15	6.16	6.4	13.21	5.13	15.58	16.9	21.6
chr1	1706971	1707081	chr1.capped.574	37	+	AT1G05690	0	proximal	UTR5	0.51	0.7	0.57	1.05	0.47	1.09	1.19	1.47	2.13
chr1	1714877	1714982	chr1.capped.575	47	+	AT1G05710	0	proximal	UTR5	1.18	1.81	4.56	2.98	4.05	13.74	4.06	5.71	4.71
chr1	1715035	1715083	chr1.capped.576	16	+	AT1G05710	0	proximal	UTR5	1.16	1.28	1.64	2.1	2.36	3.05	2.62	3.16	3.97
chr1	1715265	1715313	chr1.capped.577	24	+	AT1G05710	0	proximal	UTR5	0.68	1	0.92	0.55	0.82	0.61	1.65	1.76	2.98
chr1	1715346	1715460	chr1.capped.578	14	+	AT1G05710	0	proximal	UTR5	2.01	2.16	5.9	2.34	3.04	4.45	3.58	2.33	3.83
chr1	1715631	1715707	chr1.capped.579	34	+	AT1G05710	0	proximal	UTR5	1.11	0.24	1.5	1.46	0.25	0.56	1.21	1.41	2.75
chr1	1715736	1715780	chr1.capped.580	28	+	AT1G05710	0	proximal	UTR5	0.62	0.37	0.92	1.32	1.52	2.53	0.43	1.39	1.8
chr1	1715821	1715941	chr1.capped.581	68	+	AT1G05710	0	proximal	UTR5	0.48	0.76	3.35	0.66	1.59	3.55	2.09	4.07	3.49
chr1	1718840	1718909	chr1.capped.583	17	-	AT1G05720	0	single-exon	UTR5	42.98	47.8	38.25	53.56	41.05	46.25	97.41	97.16	108.3
chr1	1719014	1719106	chr1.capped.582	34	+	AT1G05730	0	single-exon	UTR5	2.64	2.19	1.85	2.49	1.21	1.15	1.96	1.19	1.66
chr1	1719073	1719077	chr1.noncapped.584	2	-	AT1G05720	-167	upstream	UTR5	0.51	1.62	0.31	2.84	2.19	1.98	1	0.2	1.11
chr1	1721469	1721576	chr1.capped.585	39	+	AT1G05750	0	single-exon	UTR5	0.75	1.5	0.83	1.58	0.51	2.5	3.37	1.12	0.71
chr1	1724484	1724498	chr1.capped.586	9	-	AT1G05760	0	proximal	CDS	3.36	1.19	1.87	5.21	7.82	3.99	5.23	4.75	9.9
chr1	1726212	1726346	chr1.capped.587	70	-	AT1G05770	0	proximal	UTR5	0.49	0.35	0.81	0.76	1.66	0.47	0.52	1.11	2.34
chr1	1726557	1726647	chr1.capped.588	71	+	AT1G05780	0	single-exon	UTR5	5.42	4.51	7.05	5.3	3.24	12.77	8.75	5.6	3.44
chr1	1730219	1730287	chr1.capped.589	29	+	AT1G05785	0	proximal	UTR5	7.85	6.76	6.53	8.31	7.91	13.16	26.95	19.56	30.17
chr1	1732799	1732940	chr1.capped.590	77	+	AT1G05790	0	proximal	UTR5	3.13	3.13	3.02	2.44	1.7	3.75	6.22	7.77	6.72
chr1	1744727	1744828	chr1.capped.591	52	+	AT1G05805	0	proximal	UTR5	6.81	9.45	5.75	8.43	3.5	8.96	9.81	11.25	10.16
chr1	1748229	1748423	chr1.capped.592	121	+	AT1G05810	0	proximal	CDS	2.89	1.6	2.03	2.13	1.32	3.73	3.6	4.38	2.28
chr1	1749576	1749812	chr1.capped.593	77	+	AT1G05820	0	proximal	UTR5	1.11	4.44	1.85	1.68	2.45	3.11	3.01	3.98	2.67
chr1	1754142	1754376	chr1.capped.594	124	+	AT1G05830	0	proximal	UTR5	3	3.79	2.56	5.6	2.35	7.99	2.99	4.67	2.98
chr1	1754584	1754617	chr1.noncapped.595	22	+	AT1G05830	0	proximal	CDS	0.25	0	0.13	0.51	0.95	0.78	0.09	0	0.08
chr1	1762220	1762241	chr1.capped.596	3	+	AT1G05835	0	single-exon	UTR5	57.56	51.72	69.51	48.12	43.55	74.2	71.52	63.22	112.49
chr1	1764665	1764840	chr1.capped.597	93	-	AT1G05840	-165	intron	CDS	0.67	0.36	0.34	0.79	0	0.89	0.59	0.76	0.24
chr1	1766264	1766283	chr1.capped.598	14	-	AT1G05840	0	proximal	UTR5	5.36	7.67	7.22	4.61	4.36	6.81	10.19	18.74	13.25
chr1	1768610	1768667	chr1.capped.599	52	-	AT1G05850	0	proximal	UTR5	185.49	213.86	166.21	247.73	126.89	210.03	625.88	556.26	463.37
chr1	1768986	1769076	chr1.capped.600	6	+	AT1G05860	-1	upstream	UTR5	5.69	3.89	4.52	5.06	3.96	6.35	9.81	10.27	11.78
chr1	1773248	1773309	chr1.capped.601	56	-	AT1G05870	0	proximal	UTR5	15.68	16.54	18.55	17.83	18.18	17.06	48.41	46.18	49.03
chr1	1779321	1779429	chr1.capped.602	77	+	AT1G05890	0	proximal	UTR5	4.25	5.76	4.76	4.95	3.14	5.07	10.57	16.98	14.12
chr1	1779497	1779549	chr1.capped.603	48	+	AT1G05890	0	proximal	UTR5	0.04	0.99	1.12	1.6	0.5	0.5	1.2	0.81	0.78
chr1	1786829	1786929	chr1.capped.604	33	+	AT1G05900	0	proximal	UTR5	2.32	2.61	2.91	3.91	2.29	3.85	7.57	8.6	11.78
chr1	1790223	1790235	chr1.capped.605	7	+	AT1G05910	0	proximal	UTR5	5.18	5.37	6.4	8.4	8.24	6.39	5.08	9.14	16.79
chr1	1803916	1803998	chr1.capped.606	46	-	AT1G05940	0	proximal	UTR5	8.41	9.71	7.94	11.94	5.29	5.97	12.85	20.55	19.63
chr1	1807437	1807686	chr1.capped.607	69	-	AT1G05950	0	proximal	UTR5	2.2	2.8	3.24	1.24	1.94	2.48	3.79	3.39	3.01
chr1	1808176	1808259	chr1.noncapped.608	24	-	AT1G05960	0	distal	UTR3	1.08	0.64	0.57	2.98	4.68	5.38	0.21	0.65	0.93
chr1	1815393	1815537	chr1.capped.609	68	-	AT1G05960	0	proximal	UTR5	6.82	8.41	3.3	5	5	4.56	6.76	13.69	12.57
chr1	1817263	1817340	chr1.capped.610	25	-	AT1G05970	0	proximal	UTR5	6.53	9.9	11.01	6.13	7.73	6.3	12.77	11.74	19
chr1	1821836	1821899	chr1.capped.611	52	-	AT1G06000	0	single-exon	UTR5	168.71	59.16	54.39	290.31	330.31	154.55	202.66	164.97	294.81
chr1	1822584	1822639	chr1.capped.612	15	+	AT1G06010	0	proximal	UTR5	18.6	22.42	24	21.18	15.02	23.38	35.2	28.52	21.83
chr1	1826730	1826835	chr1.capped.613	92	+	AT1G06030	0	proximal	UTR5	0.23	0.07	0.14	0	0	0.09	0.54	0.98	0.24
chr1	1829753	1829927	chr1.capped.614	53	-	AT1G06040	0	proximal	UTR5	102.04	120.49	121.95	101.75	79.69	77.9	174.91	190.58	142.33
chr1	1832286	1832593	chr1.capped.615	236	-	AT1G06050	0	proximal	UTR5	2.83	4.68	3.61	3.68	2.89	5.29	7.02	9.35	5.39
chr1	1832899	1832986	chr1.capped.616	43	+	AT1G06060	0	proximal	UTR5	8.58	8.61	9.64	12.22	5.01	12.27	19.39	17.29	16.29
chr1	1837488	1837778	chr1.capped.617	150	-	AT1G06070	0	proximal	UTR5	3.91	3.99	4.05	4.53	3.55	2.54	7.59	8.49	7.29
chr1	1843474	1843604	chr1.capped.618	90	+	AT1G06080	0	proximal	UTR5	8.22	3.96	5.32	2.24	3.38	8.72	4.2	5.96	3.6
chr1	1854958	1855069	chr1.capped.619	50	-	AT1G06110	0	proximal	UTR5	8.33	12.4	10.21	13.52	5.17	11.33	31.12	31.77	39.17
chr1	1860644	1860735	chr1.capped.620	67	-	AT1G06130	0	proximal	UTR5	6.44	9.08	9.96	7.09	6.23	7.32	10.08	18.43	19.02
chr1	1864760	1864817	chr1.capped.621	5	+	AT1G06140	-8	upstream	UTR5	0.19	0.26	0.04	0	0	0	1.12	0.74	0.55
chr1	1868808	1868900	chr1.capped.622	76	-	AT1G06143	0	single-exon	UTR5	0.84	0.79	0.82	0.55	0.77	0.91	1.24	1.24	1.51
chr1	1869225	1869255	chr1.noncapped.623	12	-	AT1G06150	0	distal	CDS	0.61	0	0.5	0.37	0	0	0.07	0	0.47
chr1	1873679	1873735	chr1.capped.624	38	-	AT1G06150	0	proximal	UTR5	2.53	3.19	3.8	2.84	2.03	2.03	6.52	7.24	5.94
chr1	1886726	1886988	chr1.capped.625	170	-	AT1G06170	0	proximal	UTR5	0.89	2.33	1.75	0.49	3.37	1.6	4.63	6.38	5.24
chr1	1888340	1888450	chr1.capped.626	103	+	.	.	intergenic	.	0.79	0.45	0.36	0.51	0.6	0.69	0.68	0.63	0.62
chr1	1889390	1889530	chr1.capped.627	1	+	AT1G06180	0	proximal	UTR5	1.77	2.29	2.64	1.66	2.93	2.94	8.47	7.83	6.88
chr1	1894076	1894172	chr1.capped.628	61	-	AT1G06190	0	single-exon	UTR5	19.14	23.55	21.11	19.1	16.18	15.93	32.11	24.55	32.52
chr1	1896902	1896974	chr1.capped.630	12	-	AT1G06200	0	proximal	CDS	29.83	34.75	30.82	36.9	21.71	31.45	60.64	71.53	68.88
chr1	1897112	1897272	chr1.capped.629	96	+	AT1G06210	0	proximal	UTR5	17.22	11.44	11.24	19.27	12.48	18.71	27.82	28.58	44.5
chr1	1899953	1900055	chr1.capped.631	10	+	AT1G06220	0	proximal	UTR5	8.94	8.25	6.7	10.02	1.73	7.08	13.01	12.37	21.52
chr1	1907027	1907168	chr1.capped.632	64	+	AT1G06230	0	proximal	UTR5	8.46	8.27	5.52	8.5	2.37	6.86	11.46	12.36	8.74
chr1	1911080	1911232	chr1.capped.633	63	+	AT1G06240	0	proximal	UTR5	4.34	3.31	4.31	4.6	2.52	6.41	8.17	10.32	13.98
chr1	1914846	1915002	chr1.capped.634	88	-	AT1G06250	-40	upstream	UTR5	2.14	2.38	4.23	2.69	15.5	3.61	8.73	8.47	5.97
chr1	1916182	1916279	chr1.capped.636	14	-	AT1G06265	0	proximal	NC	0.13	0.55	0.86	0.58	1.96	0.4	1.29	1.38	1.1
chr1	1916421	1916441	chr1.capped.635	1	+	AT1G06260	-7	upstream	UTR5	20.41	31.7	69.13	35.85	60.41	70.51	139.65	141	132.52
chr1	1919660	1919814	chr1.capped.637	99	-	AT1G06270	0	proximal	UTR5	2.22	3.8	4.09	2.64	1.87	1.62	3.54	2.85	1.91
chr1	1921172	1921186	chr1.capped.638	8	-	AT1G06280	-232	upstream	UTR5	0.4	8.13	13.49	0.51	9.97	7.36	7.76	20.65	28.6
chr1	1922346	1922407	chr1.capped.639	5	+	AT1G06290	0	proximal	UTR5	5.9	6.4	4.19	4.08	1.71	8.42	14.22	17.36	15.06
chr1	1933958	1934191	chr1.capped.640	84	-	AT1G06340	0	single-exon	UTR5	4.79	2.64	1.43	3.95	0.29	2.81	9.53	7.22	7.11
chr1	1936808	1936822	chr1.capped.641	8	-	AT1G06350	0	proximal	UTR5	43.08	40.09	47.79	56.61	32.95	53.46	41.98	48.69	67.7
chr1	1940431	1940465	chr1.capped.642	31	-	AT1G06360	0	proximal	CDS	6.95	14.26	12.8	10.02	13.92	9.09	17.45	21.91	23.45
chr1	1944660	1944662	chr1.noncapped.643	1	+	AT1G06380	-331	upstream	UTR5	0.4	0.68	0.6	0.09	1.06	1.82	0.55	0.47	0
chr1	1944865	1944961	chr1.capped.645	67	-	.	.	intergenic	.	1.55	2.33	1.87	1.27	3.08	1.95	3.77	3.56	5
chr1	1944970	1945103	chr1.capped.644	112	+	AT1G06380	0	single-exon	UTR5	6.41	6.14	6.67	6.94	4.82	6.09	12.39	9.65	16.16
chr1	1946771	1946899	chr1.capped.646	45	+	AT1G06390	0	proximal	UTR5	16.52	21.64	24.11	30.1	13.96	36.8	27.63	30.98	26.54
chr1	1952685	1952895	chr1.capped.647	82	-	AT1G06400	0	proximal	UTR5	19.3	29.51	27.96	24.59	21.37	25.84	53.41	65.13	44.64
chr1	1954716	1954927	chr1.capped.648	133	+	AT1G06410	0	proximal	UTR5	6.71	8.47	5.26	8.58	4.7	7.73	16.52	18.71	23.12
chr1	1957047	1957089	chr1.noncapped.649	17	+	AT1G06410	0	distal	CDS	0.09	0.28	0.2	4.72	3.32	2.53	0.37	0.23	0.32
chr1	1957289	1957311	chr1.noncapped.650	8	+	AT1G06410	0	distal	CDS	0.19	0.18	0.09	2.66	3.36	3.75	0.67	0.17	0.78
chr1	1958893	1959059	chr1.capped.651	68	+	AT1G06420	0	single-exon	UTR5	8.42	13.03	13.48	9.36	17.06	18.43	17.06	20.79	24.38
chr1	1962923	1963023	chr1.capped.652	87	-	AT1G06430	0	proximal	UTR5	12.98	13.5	11.25	11.54	7.14	15.37	47.13	59.53	38.96
chr1	1965777	1965911	chr1.capped.653	64	+	AT1G06450	0	single-exon	UTR5	5.05	4.93	8.13	7.51	6.65	12.58	11.41	14.31	12.86
chr1	1967212	1967258	chr1.noncapped.654	42	-	AT1G06460	0	distal	UTR3	1.59	1.38	0.54	0.81	0.53	0.54	0.25	0.78	0.16
chr1	1967318	1967367	chr1.noncapped.655	20	-	AT1G06460	0	distal	CDS	3.14	2.04	1.24	1.88	0	0	0	0.06	0
chr1	1967429	1967631	chr1.noncapped.656	189	-	AT1G06460	0	distal	CDS	2.94	1.98	1.21	1.42	0.35	0.07	0.53	0	0.64
chr1	1968226	1968292	chr1.noncapped.657	45	-	AT1G06460	0	distal	CDS	0.65	2.23	1.15	0.56	0.93	0	0	0.1	0.08
chr1	1969405	1969577	chr1.capped.659	48	-	AT1G06460	0	single-exon	UTR5	39.11	43.88	14.49	42.27	12.61	15.45	21.33	19.48	16.55
chr1	1969580	1969880	chr1.capped.658	148	+	AT1G06470	0	proximal	UTR5	5.48	5.66	3.93	8.91	4.07	7.76	9.01	11.1	13.66
chr1	1974239	1974426	chr1.capped.660	63	-	AT1G06475	0	single-exon	UTR5	2.35	2.99	3.78	3.03	4.96	3.17	7.13	7.35	4.85
chr1	1978082	1978085	chr1.noncapped.661	1	+	ENSRNA049492457-T1	0	single-exon	NC	2.51	1.41	0.46	0	1.09	1.96	0	0.04	0
chr1	1989356	1989533	chr1.capped.662	134	+	AT1G06500	0	single-exon	UTR5	10.03	8.74	9.37	10.22	7.96	12.97	14.23	11.32	13.99
chr1	1992018	1992057	chr1.capped.663	38	-	AT1G06515	0	proximal	UTR5	0.64	0.4	0.52	1.29	0.69	0.05	0.44	0.93	0.86
chr1	1992101	1992233	chr1.capped.664	104	-	AT1G06515	0	proximal	UTR5	30.03	41.13	32.4	43.89	38.9	35	59.47	64.6	72.8
chr1	1992336	1992404	chr1.capped.665	48	+	AT1G06510	0	proximal	UTR5	8.98	6.74	6.94	6.21	3.76	9.65	10.42	11.28	13.65
chr1	1994231	1994282	chr1.noncapped.666	36	-	AT1G06520	0	distal	CDS	0.12	1.1	0.53	0.03	2.16	1.65	0.49	0.32	0.24
chr1	1996019	1996172	chr1.capped.667	90	-	AT1G06520	0	proximal	UTR5	1.78	2.48	4.84	2.54	2.82	3.51	5.36	8.18	4.23
chr1	2001353	2001600	chr1.capped.668	136	+	AT1G06530	0	single-exon	UTR5	23.87	23.73	19.62	30.79	19.85	41.62	70.87	49.5	70.55
chr1	2003408	2003539	chr1.capped.669	28	-	AT1G06540	0	proximal	UTR5	0.66	3.31	0.82	0.56	0	1.56	0.11	0.48	0
chr1	2006984	2007235	chr1.capped.670	71	-	AT1G06550	0	proximal	UTR5	32.21	34.93	41.53	41.57	30.84	34.39	57.93	50.37	38.77
chr1	2007604	2007672	chr1.capped.671	48	+	AT1G06560	0	proximal	UTR5	2.07	3.17	4.3	4.94	2.59	4.34	1.82	2.79	2.58
chr1	2010416	2010546	chr1.noncapped.672	106	+	AT1G06560	-36	intron	CDS	0.38	0.38	1	0.21	1.4	0.43	1.71	1.17	0.63
chr1	2013450	2013573	chr1.capped.673	64	-	AT1G06570	0	proximal	CDS	5.95	6.35	8.54	5.6	4.4	5.63	23.18	34.52	30.95
chr1	2014171	2014224	chr1.noncapped.674	17	-	AT1G06580	0	single-exon	UTR3	0	0	0.05	0	0.43	1.36	0.34	0	0.16
chr1	2015989	2016118	chr1.capped.675	64	-	AT1G06580	0	single-exon	UTR5	0.54	1.26	1.04	0.7	0.56	0.79	0.66	0.75	0.94
chr1	2024533	2024741	chr1.capped.676	128	-	AT1G06590	0	proximal	UTR5	2.33	2.18	2.03	1.43	2.97	1.06	1.92	1.86	2.19
chr1	2025525	2025642	chr1.capped.677	75	+	AT1G06620	0	proximal	UTR5	3.54	1.82	2.82	5.67	2.59	10.13	4.21	7.83	11.88
chr1	2027725	2027781	chr1.capped.678	7	+	AT1G06630	0	proximal	UTR5	5.11	3.19	3.48	3.73	3.46	2.83	3.97	4.85	4.3
chr1	2029363	2029384	chr1.capped.679	12	+	AT1G06630	0	distal	CDS	0.09	0.45	0.21	0.1	0	0.37	0.53	0.75	0.58
chr1	2029946	2030079	chr1.capped.680	3	+	AT1G06630	-53	intron	CDS	3.76	5.35	7.37	7.11	5.22	11.26	15.11	16.77	11.24
chr1	2032343	2032354	chr1.capped.681	1	+	AT1G06640	0	proximal	UTR5	16.09	14.84	22.71	17.74	12.22	11.2	39.59	33.44	102.93
chr1	2034145	2034255	chr1.capped.682	10	+	AT1G06645	0	proximal	UTR5	1.63	2.56	1.94	3.02	2.24	1.78	3.46	6.27	5.25
chr1	2035685	2035952	chr1.capped.683	184	+	AT1G06650	0	proximal	UTR5	10.34	7.53	7.28	10.97	3.44	9.67	17.5	18.21	30.88
chr1	2040124	2040329	chr1.capped.685	108	-	AT1G06660	0	proximal	UTR5	2.08	2.22	1.82	2.28	2.01	1.5	7.45	5.31	3.38
chr1	2040408	2040512	chr1.capped.684	31	+	AT1G06670	0	proximal	UTR5	4.1	4.68	3.51	8.26	7.01	5.24	3.42	3.66	2.84
chr1	2047873	2047923	chr1.capped.686	9	+	AT1G06680	0	proximal	UTR5	366.43	396.69	379.6	535.2	298.99	785.18	503.99	492.57	572.95
chr1	2052031	2052156	chr1.capped.687	34	-	AT1G06690	0	proximal	UTR5	11.76	10.44	6.28	15.33	9.15	5.96	18.95	16.7	17
chr1	2055206	2055472	chr1.capped.688	66	-	AT1G06700	0	proximal	UTR5	18.98	28.62	20.84	24.81	19.97	27.56	35.17	38.62	28.18
chr1	2060197	2060377	chr1.capped.689	117	-	AT1G06710	0	single-exon	UTR5	0.57	0.82	0.5	0.69	0.4	0.67	0	0.47	0.24
chr1	2060973	2061011	chr1.noncapped.690	27	-	AT1G06720	0	distal	CDS	1.25	0.55	0.99	0.09	0.22	0.51	0	0.17	0.16
chr1	2067303	2067372	chr1.capped.691	36	-	AT1G06720	0	proximal	UTR5	4.41	4.52	3.78	3.93	2.78	2.44	4.53	2.82	4.38
chr1	2067500	2067606	chr1.capped.692	23	+	AT1G06730	0	proximal	UTR5	3.93	3.51	2.79	2.81	2.86	4.49	4.16	5.02	8.83
chr1	2070694	2070891	chr1.capped.693	41	+	AT1G06740	-1	upstream	UTR5	0.68	0.82	0.92	1.36	0.54	1.25	0.92	1.72	0.94
chr1	2073748	2073883	chr1.capped.694	78	+	AT1G06750	0	proximal	UTR5	0.77	1.18	1.56	0.89	1.42	2.37	0.72	2.82	0.8
chr1	2077649	2077697	chr1.capped.695	44	-	AT1G06760	0	single-exon	UTR5	78.42	105.79	78.64	96.56	56.83	64.77	142.2	206.09	165.51
chr1	2081799	2082074	chr1.capped.696	76	-	AT1G06770	0	proximal	UTR5	5.67	7.22	6.42	6.48	7.1	5.6	11.05	10.46	8.27
chr1	2083420	2083472	chr1.capped.697	3	+	AT1G06780	0	proximal	UTR5	3.36	4.16	3.68	8.43	3.56	4.72	6.58	5.68	5.54
chr1	2086634	2086696	chr1.noncapped.698	34	+	AT1G06780	0	distal	CDS	0.27	0.26	0.22	0.63	0.43	2.24	0.51	0.18	0.32
chr1	2087174	2087316	chr1.capped.699	57	+	AT1G06790	0	proximal	UTR5	7.76	5.28	7.63	6.2	6.14	6.81	7.55	5.1	5.88
chr1	2090995	2091035	chr1.noncapped.700	20	-	AT1G06800	0	proximal	CDS	0.11	0.16	0.59	0.43	0.78	0.08	0.29	0.88	0.55
chr1	2091387	2091534	chr1.capped.701	77	-	AT1G06800	0	proximal	UTR5	1.13	1.83	1.18	1.39	0.24	0.36	0.63	1.53	2.42
chr1	2096185	2096328	chr1.capped.702	54	-	AT1G06820	0	proximal	UTR5	4.37	5.61	4.14	5.02	3.55	4.55	6.66	7.54	9.21
chr1	2096429	2096591	chr1.capped.703	55	-	AT1G06820	0	proximal	UTR5	1.07	0.32	0.48	0.11	0.69	0.16	1.52	1.44	1.41
chr1	2097148	2097209	chr1.capped.704	2	+	AT1G06830	0	single-exon	UTR5	4.06	5.67	10.47	5.31	3.96	6.69	3.57	1.72	1.01
chr1	2103234	2103515	chr1.capped.705	28	-	AT1G06840	0	proximal	UTR5	2.46	3.37	1.97	1.88	0.69	1.25	3.88	3.42	2.99
chr1	2104984	2105176	chr1.capped.706	54	+	AT1G06850	-9	upstream	UTR5	3.31	2.67	1.72	5.87	2.04	4.9	3.14	4.87	6.67
chr1	2107393	2107468	chr1.noncapped.707	3	-	AT1G04517	-1	upstream	NC	0.88	0.88	0.19	0.73	2.5	1.07	2.7	1.52	0
chr1	2108582	2108673	chr1.capped.708	25	+	AT1G06870	0	proximal	UTR5	5.06	6.65	4.43	7.34	3.02	6.69	7.44	7.58	8.16
chr1	2111099	2111224	chr1.noncapped.709	47	-	AT1G04527	0	single-exon	NC	3.25	2.28	2.41	1.51	2.85	1.19	2.76	1.93	1.09
chr1	2114329	2114389	chr1.capped.711	34	-	AT1G06890	0	proximal	UTR5	2.79	12.04	7.2	3.53	8.08	11.26	1.16	7.39	1.56
chr1	2114456	2114606	chr1.capped.712	82	-	AT1G06890	0	proximal	UTR5	14.91	16.02	13.69	15.42	8.09	11.9	25.1	35.12	25.1
chr1	2114666	2114829	chr1.capped.710	98	+	AT1G06900	0	antisense	UTR3	0.45	1.02	0.75	0.6	0.37	2.24	0.15	1.19	0.16
chr1	2120669	2120759	chr1.capped.713	75	-	AT1G06900	0	proximal	UTR5	6.35	7.92	7.23	9.5	8.22	10.41	6.49	4.73	6.71
chr1	2120879	2121043	chr1.capped.714	91	+	AT1G06910	-20	upstream	UTR5	1.11	2.84	1.48	1.62	0.31	1.67	3.21	3.07	4.86
chr1	2135159	2135164	chr1.noncapped.715	4	+	AT1G06950	0	antisense	CDS	3.9	3.65	2.95	2.92	3.59	2.64	1.48	0.58	0.23
chr1	2135593	2135716	chr1.capped.717	71	-	AT1G06950	0	proximal	UTR5	15.79	16.24	12.44	7.25	7.74	7.1	14.27	10.91	13.81
chr1	2135818	2135912	chr1.capped.716	70	+	AT1G06960	0	proximal	UTR5	12.85	19.75	19.72	20.31	20.21	24.57	36.81	29.2	35.14
chr1	2137682	2137711	chr1.capped.718	17	-	AT1G06960	0	antisense	UTR3	2.15	0.85	1.46	0.65	1.51	2.21	0.33	3.23	0.47
chr1	2137812	2138026	chr1.capped.719	118	+	AT1G06970	0	proximal	UTR5	1.56	1.83	2.55	0.93	0.83	3.28	0.63	3.73	0.4
chr1	2143765	2143825	chr1.capped.720	55	-	AT1G06980	0	single-exon	UTR5	2.08	2.31	1.59	1.59	4.04	2.54	2.16	3.42	2.35
chr1	2148289	2148449	chr1.capped.721	56	+	AT1G06990	0	proximal	UTR5	2.16	1.89	5	2.96	8.7	5.71	7.76	8.95	9.23
chr1	2152333	2152549	chr1.capped.722	215	-	AT1G07000	-8	upstream	UTR5	1.03	0.54	0.94	0.55	0.92	2.98	0.99	1.48	1.98
chr1	2152844	2152942	chr1.capped.723	18	+	AT1G07010	0	proximal	UTR5	7.71	9.56	9.34	7.43	4.76	16.04	30.19	25.81	32.34
chr1	2155931	2156013	chr1.capped.724	71	-	AT1G07020	0	proximal	UTR5	15.06	16.54	16.03	19.52	10.83	21.67	20.63	21.3	21.45
chr1	2160662	2160823	chr1.capped.725	138	-	AT1G07030	0	proximal	UTR5	8.36	9.9	7.66	10.15	7.4	7.71	14.61	13.12	23.03
chr1	2161476	2161530	chr1.noncapped.726	25	-	AT1G07040	0	distal	CDS	1.69	1.73	2.33	2	0	1.27	0.27	0.45	0.16
chr1	2163042	2163380	chr1.capped.727	76	-	AT1G07040	0	proximal	UTR5	12.77	14.99	11.55	14.05	8.79	8.15	36.84	44.91	28.62
chr1	2165031	2165276	chr1.capped.728	161	-	AT1G07050	0	proximal	UTR5	8.88	6.04	0.4	10.53	3.34	0.89	1.66	0.74	1.56
chr1	2168286	2168400	chr1.capped.729	64	-	AT1G07060	0	proximal	CDS	0.3	0.41	0.16	0.59	0	0.61	0.77	1.03	0.79
chr1	2168559	2168616	chr1.capped.730	38	+	AT1G07070	0	proximal	UTR5	35.95	34.79	33.01	54.09	30.34	62.33	67.05	45.15	60.51
chr1	2169980	2170064	chr1.capped.731	59	+	AT1G07080	0	proximal	UTR5	33.67	33.45	31.84	40.16	19.52	39.84	82.36	92.42	129.12
chr1	2174789	2175055	chr1.capped.732	77	-	AT1G07090	0	single-exon	UTR5	3.86	3.88	2.66	4.44	5.9	2.45	9.31	7.21	5.49
chr1	2182389	2182422	chr1.noncapped.733	9	-	AT1G07110	0	distal	CDS	0.05	0.26	0	0.98	0.62	1.26	0.73	0.09	0.24
chr1	2183985	2184170	chr1.capped.734	162	-	AT1G07110	0	proximal	UTR5	10.12	11.21	8.6	9.93	6.9	8.13	21.43	26.69	23.49
chr1	2184313	2184460	chr1.capped.735	22	+	AT1G07119	0	single-exon	NC	1.13	1.47	1.53	2.21	0	1.34	1.72	1.29	1.74
chr1	2188382	2188536	chr1.capped.736	146	-	AT1G07128	0	single-exon	NC	1.14	2.6	3.75	3.11	3.37	3.85	4.25	7.41	8.2
chr1	2190593	2190659	chr1.capped.737	63	-	AT1G07135	0	single-exon	UTR5	20.29	23.57	35.22	19.59	26.86	130.95	5.98	13.49	76.92
chr1	2192208	2192240	chr1.noncapped.738	17	-	AT1G07140	0	distal	UTR3	0.48	0.53	0.48	9.64	13.72	8.04	0.84	1.26	1.26
chr1	2193751	2193783	chr1.capped.739	28	-	AT1G07140	0	proximal	UTR5	74.44	79.29	57.6	85.41	58.92	56.6	107.04	91.32	66.45
chr1	2195783	2195843	chr1.capped.740	12	-	AT1G07150	0	proximal	UTR5	0.79	0.1	1.46	1.53	0.55	0.68	0.99	1.94	0.78
chr1	2200111	2200186	chr1.capped.741	48	+	AT1G07170	0	single-exon	UTR5	22.98	21.41	32.22	27.63	19.59	39.01	30.99	30.8	36.79
chr1	2204234	2204389	chr1.capped.742	97	+	AT1G07180	0	proximal	UTR5	5.4	4.95	5.2	4.96	3.4	7.03	16.89	16.34	12.33
chr1	2212329	2212612	chr1.capped.743	93	-	AT1G07200	0	proximal	UTR5	3.26	3.04	2.85	2.79	3.16	2.4	6.73	8.16	10.55
chr1	2215208	2215308	chr1.capped.744	14	+	AT1G07210	0	proximal	UTR5	18.51	18.03	19.18	24.8	14.42	23.75	38.62	29.08	33.53
chr1	2217056	2217060	chr1.noncapped.745	3	-	AT1G07220	0	distal	UTR3	2.24	1.2	0.2	1.2	0	0.92	0.66	0	0.4
chr1	2219366	2219698	chr1.capped.746	98	-	AT1G07220	0	single-exon	UTR5	10.56	6.21	6.55	12.71	20.31	18.88	17.87	26.72	24.46
chr1	2222783	2223025	chr1.capped.747	129	-	AT1G07230	0	proximal	UTR5	6.57	9.41	8.64	7.01	5.73	5.52	11.21	16.24	12.65
chr1	2223814	2223897	chr1.capped.748	40	+	AT1G07240	0	single-exon	UTR5	0.91	0.83	0.86	0.85	0	1.83	2.47	2.05	2.81
chr1	2224453	2224557	chr1.capped.749	47	-	AT1G07240	0	antisense	CDS	0.4	0.29	0.84	0.18	1.6	1.27	0.91	2.04	0.78
chr1	2224717	2224746	chr1.capped.750	3	+	AT1G07240	0	single-exon	CDS	0.89	1.48	0.71	0.64	1.14	1.19	1.53	1.08	1.41
chr1	2225727	2225990	chr1.capped.751	255	+	AT1G07250	0	single-exon	CDS	10.14	6	6.67	11.26	3.4	7.47	15.07	16.26	18.73
chr1	2226880	2226925	chr1.capped.752	35	-	AT1G07250	0	antisense	CDS	1.51	1.65	1.98	0.49	0.88	0.39	2.28	2.7	1.88
chr1	2229162	2229394	chr1.capped.753	63	-	AT1G07260	0	single-exon	UTR5	0.56	0.73	0.98	0.58	0.77	0.27	0.61	0.8	2.52
chr1	2232936	2233055	chr1.capped.754	21	-	AT1G07270	0	proximal	UTR5	0.49	0.99	0.89	0.51	0	0.54	0.85	1.73	2.51
chr1	2238040	2238229	chr1.capped.755	46	+	AT1G07280	0	proximal	UTR5	6.32	9.71	7.21	7.63	2.68	9.71	6.82	7.31	7.11
chr1	2240702	2240739	chr1.capped.756	29	+	AT1G07280	0	distal	CDS	0.15	0.91	0.61	0.43	0	0	0.19	0.65	0.08
chr1	2244819	2244972	chr1.capped.757	127	-	AT1G07290	0	proximal	UTR5	0.36	0.66	0.66	0.34	0	0.42	1.33	0.51	0.63
chr1	2246503	2246578	chr1.capped.758	21	-	AT1G07300	0	single-exon	CDS	0.18	0.59	0.56	0.16	0.68	0.5	0.34	0.4	0.4
chr1	2248872	2248961	chr1.capped.759	60	-	AT1G07300	0	single-exon	UTR5	15.4	22.58	19.46	17.42	12.75	13.92	17.3	28.7	37.55
chr1	2249095	2249179	chr1.capped.760	45	+	AT1G07320	0	single-exon	UTR5	57.9	46.8	45.37	63.76	24.86	46.11	81.01	71.69	73.23
chr1	2250967	2251086	chr1.capped.761	80	+	AT1G07330	0	proximal	UTR5	1.69	2.35	2.37	2.13	0.53	3.43	0.17	3.42	0.7
chr1	2254799	2254806	chr1.capped.762	1	+	AT1G07340	-21	upstream	UTR5	1.12	1.68	3.92	0.41	4.41	4.61	2.67	7.9	4.05
chr1	2260066	2260186	chr1.capped.763	22	-	AT1G07350	0	proximal	CDS	6.14	8.16	15.87	6.3	12.22	13.45	17.49	21.56	16.6
chr1	2262793	2262916	chr1.capped.764	30	-	AT1G07360	0	proximal	UTR5	15.29	20.35	14.05	12.88	12.83	13.18	30.45	31.63	41.93
chr1	2263052	2263160	chr1.capped.765	84	+	AT1G07370	0	proximal	UTR5	15.37	16.94	15.87	23.37	11.64	12.51	25.17	10.43	20.12
chr1	2268903	2269128	chr1.capped.766	197	-	AT1G07380	0	proximal	UTR5	0.83	0.45	0.43	0.99	1.66	0.81	1.17	0.99	1.04
chr1	2269636	2269743	chr1.capped.767	46	+	AT1G07390	0	proximal	UTR5	3.1	0.62	1	2.66	1.71	4.56	2.08	1.99	0.56
chr1	2274878	2275067	chr1.capped.768	182	+	AT1G07400	0	single-exon	UTR5	2.54	2.41	6.1	4.85	3.83	5.46	10.61	13.58	11.72
chr1	2276025	2276203	chr1.capped.769	52	+	AT1G07410	0	proximal	UTR5	5.2	6.54	8.03	7.53	8.11	18.93	10.74	19.31	10.74
chr1	2277691	2277931	chr1.capped.770	138	+	AT1G07420	0	proximal	UTR5	21.44	16.54	6.56	26.01	5.02	15.11	19.46	17.97	23.26
chr1	2282735	2282834	chr1.capped.771	85	-	AT1G07430	0	proximal	UTR5	8.59	3.79	2.72	8.96	6.59	4.13	2.32	9.24	5.09
chr1	2287527	2287733	chr1.capped.772	194	-	AT1G07440	0	proximal	UTR5	24.99	26.46	18.66	23.76	16.18	16.65	42.88	44.45	36
chr1	2289133	2289416	chr1.capped.773	139	-	AT1G07450	0	proximal	UTR5	13.76	12.69	10.44	15.52	6.68	9.84	15.49	16.3	16.98
chr1	2291455	2291499	chr1.capped.774	5	+	AT1G07470	0	proximal	UTR5	8.94	10.67	10.65	10.35	7.16	14.59	13.79	14.17	24.78
chr1	2294697	2294700	chr1.noncapped.775	2	-	AT1G07473	0	single-exon	UTR3	0.09	0	0	0	0	0	2.18	2.11	0.78
chr1	2295101	2295256	chr1.capped.776	71	-	AT1G07473	0	single-exon	UTR5	3.77	2.71	4.85	4.01	3.17	2.27	8.14	9.55	5.31
chr1	2295297	2295427	chr1.capped.777	123	+	AT1G04583	0	single-exon	NC	0.47	0.33	0.24	0	0.67	1.18	0.07	0.76	0.24
chr1	2295818	2295960	chr1.capped.778	105	+	AT1G07476	0	single-exon	CDS	0.55	0.3	0.86	1.16	0.47	1.7	0.42	2.16	1.81
chr1	2299455	2299470	chr1.capped.779	10	-	AT1G07480	0	proximal	UTR5	7.79	8.33	7.55	7.07	5.6	7.81	11.72	16.69	15.82
chr1	2301306	2301431	chr1.capped.780	73	+	AT1G07485	0	single-exon	UTR5	1.43	1.07	0.77	1.15	0.69	1.48	0.18	0.94	1.66
chr1	2301930	2302102	chr1.capped.781	79	-	AT1G07490	0	single-exon	UTR5	3.68	4.45	8.92	6.76	9.1	4.96	8.91	9.36	2.89
chr1	2305026	2305073	chr1.capped.782	30	-	AT1G07500	-26	upstream	UTR5	0	0.18	0.61	0.46	0.31	0.82	0.94	1.04	3.28
chr1	2305376	2305623	chr1.capped.783	150	+	AT1G07510	0	single-exon	UTR5	4.43	4.94	3.36	4.08	3.32	7.26	9.9	11.67	8.79
chr1	2305673	2305701	chr1.capped.784	7	+	AT1G07510	0	single-exon	UTR5	0.26	0.33	0.56	0.07	0	0.7	1.06	1.23	0.16
chr1	2308468	2308510	chr1.noncapped.785	23	+	AT1G07510	0	distal	CDS	0.28	0.27	0.15	0.95	1.5	1.57	0	0	0.08
chr1	2311998	2312229	chr1.capped.786	205	-	AT1G07520	0	single-exon	UTR5	1.11	1.47	1.83	0.85	0.22	2.22	2.77	2.5	1.96
chr1	2316374	2316594	chr1.capped.787	75	-	AT1G07530	0	proximal	UTR5	3.28	3.85	4.32	3.19	1.21	1.19	6.36	7.83	2.68
chr1	2321641	2321719	chr1.capped.788	14	-	AT1G07540	0	single-exon	UTR5	2.63	1.05	2.05	3.62	2.69	4.34	2.22	9.88	5.55
chr1	2331156	2331158	chr1.noncapped.789	1	+	AT1G07570	0	antisense	UTR3	0	0	0	0	0	0	0.57	0.96	0.93
chr1	2333237	2333267	chr1.capped.790	7	-	AT1G07570	0	proximal	UTR5	0.91	1.1	2.13	1.25	1.81	1.18	5.91	5.86	2.69
chr1	2333288	2333716	chr1.capped.791	36	-	AT1G07570	0	proximal	UTR5	9.22	11.05	15.33	12	14.15	13.81	19.74	27.51	24.48
chr1	2336166	2336279	chr1.capped.792	72	+	.	.	intergenic	.	0.13	0.13	0.38	0.06	0.45	0.36	0.37	0.82	0.87
chr1	2338356	2338519	chr1.capped.793	147	-	AT1G07590	0	distal	UTR5	1.68	1.18	0.94	1.09	0.35	0.34	2.29	3.62	1.74
chr1	2339372	2339388	chr1.capped.794	12	-	AT1G07590	0	proximal	UTR5	521.07	673.63	802.54	633.54	938.43	1264.95	677.74	1168.01	341.83
chr1	2341486	2341574	chr1.capped.795	55	+	AT1G07610	0	proximal	UTR5	2.25	5.22	7.08	2.5	4.87	9.33	6.02	13.26	7.25
chr1	2344237	2344329	chr1.capped.796	67	-	AT1G07615	0	proximal	UTR5	4.23	3.13	2.1	4.8	1.74	2.24	4.57	4.41	7.02
chr1	2348911	2349159	chr1.capped.797	185	+	AT1G07630	0	proximal	UTR5	2.62	1.77	1.86	1.74	2.89	2.64	2.12	3.81	4.15
chr1	2355738	2355775	chr1.capped.798	32	-	AT1G07640	0	single-exon	CDS	7.99	8.71	7.55	10.42	3.98	7.56	20.8	27.09	23
chr1	2355831	2356051	chr1.capped.799	133	-	AT1G07640	0	single-exon	CDS	1.35	1.62	1.29	1	1.59	1.82	3.08	4.52	2.77
chr1	2356107	2356258	chr1.capped.800	95	-	AT1G07640	0	single-exon	UTR5	0.36	0.31	0.34	0.8	1.05	0.95	0.73	0.41	0.95
chr1	2364674	2364730	chr1.capped.801	24	-	AT1G07650	0	distal	CDS	0.36	0.67	0.62	0.42	0.24	0.27	0.82	0.46	0.78
chr1	2366430	2366635	chr1.capped.802	101	-	AT1G07650	0	proximal	UTR5	7.4	8.17	4.37	7.06	6.25	3.1	4.38	5.02	2.9
chr1	2368305	2368459	chr1.capped.803	71	-	AT1G07645	0	proximal	UTR5	5.7	4.17	8.63	7.37	9.19	13.36	6.67	16.48	11.43
chr1	2368831	2368972	chr1.capped.804	4	+	AT1G07660	-1	upstream	UTR5	25.75	29.39	32.6	28.76	35.04	39.02	45.88	41.68	47.22
chr1	2368994	2369072	chr1.capped.805	35	+	AT1G07660	-159	intron	UTR5	1.28	1.2	2.39	2.07	1.04	3.06	1.28	2.43	5.19
chr1	2374437	2374657	chr1.capped.806	102	-	AT1G07670	0	proximal	UTR5	7.73	8.11	8.29	9.32	8.42	9.3	7.23	9.98	12.65
chr1	2378031	2378066	chr1.capped.807	1	+	AT1G07690	0	proximal	CDS	0.47	0.11	0.24	0.08	0.21	0	0	0.67	0.55
chr1	2379614	2379752	chr1.capped.808	51	+	AT1G07700	0	proximal	UTR5	19.8	21.79	22.32	29.99	17.93	29.92	47.66	45.65	64.3
chr1	2381571	2381679	chr1.capped.809	80	+	AT1G07705	0	proximal	UTR5	6.29	5.38	3.62	6.22	1.68	7.01	7.4	6.77	15.9
chr1	2392359	2392476	chr1.capped.810	93	-	AT1G07720	0	single-exon	CDS	23.16	10.72	10.8	23.54	10.82	12.31	28.94	34.44	13.32
chr1	2393764	2393790	chr1.capped.811	1	+	.	.	intergenic	.	3.55	7.58	17.81	9.05	9.76	14.89	10.48	14.32	14.43
chr1	2393871	2393918	chr1.capped.812	39	+	.	.	intergenic	.	0.81	1.52	2.3	0.97	3.3	2.56	0.89	2.21	0.71
chr1	2394216	2394218	chr1.noncapped.813	1	-	.	.	intergenic	.	0.25	1.93	7.88	0.28	0.51	0.43	0.66	4.07	4.59
chr1	2395431	2395536	chr1.capped.814	13	+	AT1G07728	0	single-exon	NC	2.23	3.12	3.36	3.41	1.28	3.62	3.24	6.76	5.06
chr1	2397104	2397178	chr1.noncapped.815	30	+	AT1G07728	0	single-exon	NC	0.3	0.2	0.31	0.15	0	0.52	1.23	0.38	0.86
chr1	2399931	2400026	chr1.capped.816	28	+	AT1G07740	0	antisense	CDS	0	0.07	0.1	0.33	0	0	0.65	0.07	0.54
chr1	2400402	2400612	chr1.capped.817	105	-	AT1G07740	0	proximal	UTR5	1.2	0.93	0.54	0.5	0.48	1.16	2.55	0.36	1.18
chr1	2402801	2402926	chr1.capped.818	64	-	AT1G07745	0	proximal	UTR5	2.19	2.52	3.43	2.33	1.06	1.65	3.03	5.09	3.62
chr1	2405872	2405943	chr1.capped.819	69	-	AT1G07750	0	proximal	UTR5	38.29	22.55	37.46	42.74	26.88	35.1	49.63	98.72	153.5
chr1	2407512	2407650	chr1.capped.820	87	+	AT1G07770	0	antisense	UTR3	64.32	41.69	53.41	55.24	43.81	191.48	73.21	84.82	153.78
chr1	2409492	2409580	chr1.capped.821	51	-	AT1G07770	0	proximal	UTR5	246.25	284.73	334.38	244.51	230.94	203.06	279.98	249.96	133.58
chr1	2409861	2410048	chr1.noncapped.822	1	+	.	.	intergenic	.	1.74	0.38	0.16	0.26	0.88	1.42	0.3	0.71	0.67
chr1	2410492	2410576	chr1.noncapped.823	82	-	AT1G07780	0	distal	CDS	0.6	0.75	1.85	0.79	0.08	0.71	0.44	0	0.4
chr1	2411903	2412021	chr1.capped.824	49	-	AT1G07780	0	proximal	UTR5	1.25	2.07	1.65	2.79	0.55	4.07	0.71	2.81	1.01
chr1	2412583	2412711	chr1.capped.825	91	-	AT1G07780	0	proximal	UTR5	3.92	9.59	10.43	18.92	0.57	25.5	29.58	7.12	5.24
chr1	2412991	2413033	chr1.capped.826	4	+	AT1G07790	0	single-exon	UTR5	59.08	95.49	66.23	107.92	69.44	102.07	194.19	134.04	141.97
chr1	2414246	2414383	chr1.capped.827	97	+	AT1G07795	0	single-exon	UTR5	1.76	2.42	4.23	0.59	3.6	8.23	7.63	8.4	4.83
chr1	2414403	2414470	chr1.noncapped.828	36	+	AT1G07795	0	single-exon	UTR5	0.41	0.53	2.44	0	1.17	1.13	2.29	1.28	0.39
chr1	2416193	2416281	chr1.capped.829	64	+	AT1G07810	0	proximal	UTR5	4.49	6.15	3.68	6.22	1.26	2.5	8.86	9.1	11.72
chr1	2421874	2421947	chr1.capped.830	66	-	AT1G07820	0	single-exon	UTR5	173.51	267.76	171.76	220.99	199.23	147.26	214.01	231.91	166.43
chr1	2422237	2422314	chr1.capped.831	67	+	AT1G07830	0	proximal	UTR5	25.09	22.03	22.9	27.48	21.61	31.54	29.51	23.47	28.53
chr1	2422372	2422397	chr1.capped.832	20	+	AT1G07830	-115	intron	UTR5	0.21	0.15	0.16	0.12	0	0	0.24	0.45	0.55
chr1	2424048	2424120	chr1.capped.833	4	+	AT1G07840	-1	upstream	UTR5	6.81	8.1	7.21	12.17	5.36	8.55	12.64	15.63	20.1
chr1	2426684	2426732	chr1.capped.834	7	+	AT1G07840	0	distal	UTR3	1.38	0.53	0.85	0.41	1.06	2.32	0.65	1.79	2.35
chr1	2431941	2432077	chr1.capped.835	77	-	AT1G07870	0	proximal	UTR5	3.28	4.38	3.99	3.47	4.44	5.47	5.64	6.09	6.5
chr1	2435702	2435811	chr1.capped.836	41	-	AT1G07880	0	proximal	UTR5	1.14	1.67	1.04	1.5	1.9	1.63	3.52	2.89	9.83
chr1	2436755	2436883	chr1.capped.837	88	-	AT1G07885	0	proximal	UTR5	0.12	0.54	1.04	1.2	0.28	0.98	0.92	1.09	0.31
chr1	2437473	2437514	chr1.capped.838	4	+	AT1G07890	0	proximal	UTR5	237.39	266.44	279.71	479.07	180.25	418.58	472.08	376.02	430.67
chr1	2437842	2437846	chr1.capped.839	3	-	AT1G07890	0	antisense	UTR5	2.65	1.7	1.06	3.71	2.81	3.03	1.47	0.95	0.08
chr1	2443684	2443958	chr1.capped.840	174	+	AT1G07902	-59	upstream	UTR5	3.61	3.88	3.54	3.96	3.71	4.73	5.6	7.4	5.8
chr1	2444057	2444085	chr1.capped.841	15	+	AT1G07902	-570	intron	CDS	0.95	1	1.1	2.74	1.25	2.08	2.66	1.3	0.4
chr1	2446004	2446252	chr1.capped.842	219	+	AT1G07910	0	proximal	CDS	1.07	0.93	0.64	1.41	0.25	0.65	1.79	1.22	1.02
chr1	2454845	2454916	chr1.capped.843	41	+	AT1G07920	0	proximal	UTR5	133.55	102.1	101.41	125.33	36.02	84.59	110.15	97.61	93.43
chr1	2456694	2456755	chr1.noncapped.844	40	+	AT1G07920	0	distal	CDS	3.76	3.97	6.25	8.76	3.3	6.61	1.36	1.87	3.53
chr1	2456892	2456949	chr1.noncapped.845	43	+	AT1G07920	0	distal	CDS	10.68	16.25	18.67	9.48	6.3	4.41	6.87	3.1	8.69
chr1	2458271	2458290	chr1.capped.846	5	+	AT1G07930	0	proximal	UTR5	82.82	108.33	87.62	83.05	43.62	108.08	104.93	102.85	106.34
chr1	2463683	2463959	chr1.noncapped.847	190	-	AT1G07940	0	distal	CDS	22.77	79.63	79.44	20.11	36.38	8.84	26.37	9.93	15.49
chr1	2465457	2465467	chr1.capped.848	9	-	AT1G07940	0	proximal	UTR5	210.03	263.45	159.83	268.36	142.1	177.45	374.7	416.4	405.57
chr1	2466974	2467055	chr1.capped.850	27	-	AT1G07950	0	proximal	CDS	14.93	16.98	15.44	16.56	14.75	13.81	29.66	30.91	26.79
chr1	2467141	2467215	chr1.capped.849	19	+	AT1G07960	-1	upstream	UTR5	17.97	18.88	21.77	24.73	16.71	24.04	28.47	28.12	37.18
chr1	2472525	2472679	chr1.capped.851	84	-	AT1G07970	0	proximal	UTR5	2.61	4.42	3.85	2.16	1.94	1.38	6.82	4.63	5.01
chr1	2474887	2474927	chr1.capped.852	37	-	AT1G07980	0	proximal	UTR5	10.42	9.89	6.64	11.85	11.2	10.99	21.82	25.37	28.85
chr1	2475392	2475448	chr1.capped.853	1	+	AT1G07985	0	single-exon	UTR5	0.16	0	0.6	0.24	0.92	0.71	0.1	0.9	0.08
chr1	2477005	2477263	chr1.capped.854	152	+	AT1G07990	0	proximal	UTR5	7.01	5.78	5.74	5.62	3.29	9.34	12.33	10.14	23.04
chr1	2480510	2480512	chr1.noncapped.855	1	-	AT1G07990	3	intronic antisense	CDS	3.42	2.06	4.19	2.21	2.14	1.78	2.92	3.1	1.58
chr1	2483460	2483484	chr1.noncapped.856	21	-	AT1G08000	0	distal	CDS	0	0.32	0.1	0.78	0.93	1.76	0	0	0
chr1	2484782	2484869	chr1.capped.857	69	-	AT1G08000	0	proximal	UTR5	0.39	0.71	1.1	0.26	0.46	0.42	0.29	0.65	0.8
chr1	2484907	2485156	chr1.capped.858	144	-	AT1G08000	0	proximal	UTR5	6.68	5.85	5.71	7.29	5.1	6.66	8.82	6.54	9.77
chr1	2487663	2487860	chr1.capped.859	156	-	AT1G08010	0	proximal	UTR5	2.07	2.03	2.02	0.98	0.8	1.09	2.09	1.97	3.05
chr1	2487898	2488077	chr1.capped.860	128	-	AT1G08010	0	proximal	UTR5	13.18	13.28	9.66	15.4	5.45	11.25	23.7	24.95	28.89
chr1	2493194	2493376	chr1.capped.861	52	-	AT1G08030	0	proximal	UTR5	6.36	5.38	6.19	7.41	5.63	5.95	10.99	12.33	10.08
chr1	2494407	2494584	chr1.capped.862	172	+	AT1G08035	0	proximal	UTR5	0.29	0.37	0.11	0.68	0.39	0.21	0.46	0.51	0.71
chr1	2498575	2498687	chr1.capped.863	65	-	AT1G08040	0	proximal	UTR5	10.58	13.22	11.16	9.27	7.56	8.42	26.76	24.81	28.29
chr1	2511016	2511091	chr1.capped.864	58	-	AT1G08060	0	proximal	UTR5	1.21	2.3	1.08	1.22	1.34	1.35	1.84	1.96	2.75
chr1	2513371	2513570	chr1.capped.865	84	-	AT1G08065	-2	upstream	UTR5	0.67	0.42	3.14	0.59	3.54	1.84	2.19	5.64	2.97
chr1	2516583	2516627	chr1.capped.866	37	-	AT1G08070	-1	upstream	UTR5	0.14	0.32	0.28	0.55	0.69	0.31	0.57	0.19	0.78
chr1	2535297	2535449	chr1.capped.867	72	+	AT1G08110	0	proximal	UTR5	34.15	27.75	33.19	42.5	21.91	38.22	48.08	41.24	41.91
chr1	2535561	2535611	chr1.capped.868	15	+	AT1G08110	0	proximal	CDS	0.9	0.77	0.78	0.43	0	0.08	0.1	0.46	0.33
chr1	2538145	2538238	chr1.noncapped.869	92	-	AT1G08115	0	single-exon	NC	0	0.91	1.62	0	4.89	0.27	0.05	0.65	0.24
chr1	2542233	2542357	chr1.capped.870	58	-	AT1G08125	0	proximal	UTR5	5.94	9.31	7.59	7.59	8.63	6.52	18.56	16.37	16.78
chr1	2547808	2547943	chr1.capped.871	49	-	AT1G08130	0	proximal	UTR5	6.25	7.65	9.38	6.04	4.43	5.12	9.07	9.88	9.29
chr1	2551448	2551546	chr1.capped.872	61	-	AT1G08135	0	proximal	UTR5	0.54	0.44	0.24	0	0.65	1.03	0	1.14	0.16
chr1	2555043	2555256	chr1.capped.873	117	-	AT1G08140	0	proximal	UTR5	2.47	10.86	4.81	0.94	2.37	2.92	0	6.44	0.56
chr1	2559096	2559286	chr1.capped.874	52	-	AT1G08150	0	proximal	UTR5	0.61	5.7	1.78	1.41	1.14	2.45	0.31	4.06	0.39
chr1	2560396	2560407	chr1.capped.875	6	-	AT1G08160	0	single-exon	UTR5	9.96	8.09	7.18	13.03	5.63	11.72	9.68	16.6	11.37
chr1	2562054	2562149	chr1.capped.876	94	-	AT1G08165	0	proximal	CDS	2.17	3.4	3.26	2.5	1.63	3.09	4.5	4.99	2.42
chr1	2563608	2563763	chr1.capped.877	79	-	AT1G08170	0	single-exon	UTR5	0.57	0.88	2.05	1.09	0.35	3.5	0.76	2.82	1.64
chr1	2564976	2565259	chr1.capped.878	165	-	AT1G08180	0	single-exon	UTR5	13.18	10.65	11.04	13.03	12.29	15.87	19.91	17.18	10.4
chr1	2567378	2567586	chr1.capped.879	118	+	AT1G08190	0	proximal	UTR5	34.3	33.49	31.23	50.84	34.85	59.31	36.69	37.73	45.16
chr1	2576621	2576715	chr1.capped.880	71	-	AT1G08200	0	proximal	UTR5	89.7	74.47	67.22	68.68	38.56	59.24	90.35	125.79	114.37
chr1	2580603	2580669	chr1.capped.881	3	-	AT1G08210	0	proximal	CDS	4.82	5.62	5.27	6.26	2.36	5.45	8.54	13.1	11.85
chr1	2583226	2583392	chr1.capped.882	103	-	AT1G08220	0	proximal	UTR5	3.35	3.42	3.16	2.45	3.6	2.7	4.66	4.74	6.87
chr1	2586671	2586813	chr1.capped.883	61	-	AT1G08230	0	proximal	UTR5	13.91	20.37	24.05	27.15	47.89	22.55	54.92	62.74	60.93
chr1	2590222	2590372	chr1.capped.884	51	-	AT1G08250	0	single-exon	UTR5	7.43	7.28	7.83	7.29	4.34	5.57	28.36	27.27	29.7
chr1	2590755	2590945	chr1.capped.885	160	+	AT1G08260	0	proximal	UTR5	1.94	1.21	1.36	1.48	0.81	1.25	0.84	0.18	0.71
chr1	2600282	2600328	chr1.noncapped.886	44	+	AT1G08260	0	distal	CDS	0.25	0.05	0	0.64	0.3	0.8	0.1	0	0.08
chr1	2607415	2607738	chr1.capped.887	103	-	AT1G08270	-12	upstream	UTR5	1.07	0.56	0.98	1.16	0.85	1.77	1.2	3.77	2.45
chr1	2607842	2608161	chr1.capped.888	260	+	AT1G08280	0	single-exon	UTR5	3.35	2.74	2.12	4.28	2.77	1.21	5.62	5.4	7.41
chr1	2613210	2613249	chr1.capped.889	26	-	AT1G08290	0	proximal	UTR5	0.22	0.21	0.42	0.88	0	0.39	0.74	0.78	1.8
chr1	2614902	2615038	chr1.capped.890	98	+	AT1G08300	0	proximal	CDS	0.89	0.9	0.69	0.92	0.86	1.75	1.74	0.51	0.48
chr1	2621406	2621696	chr1.capped.891	59	-	AT1G08315	0	single-exon	CDS	1.29	1.83	2.42	2.02	2.78	1.34	2.22	3.15	2.45
chr1	2626014	2626112	chr1.capped.892	41	-	AT1G08320	0	proximal	CDS	0.33	1.01	0.11	0	0.18	0.14	2.44	1.06	1.01
chr1	2627596	2627873	chr1.capped.893	192	-	AT1G08320	0	proximal	UTR5	0.62	1.94	1.26	0.91	1.67	2.46	4.77	2.49	2.43
chr1	2630907	2631168	chr1.capped.894	160	+	AT1G08340	0	proximal	UTR5	0.42	1.94	3.96	2.28	1.46	3.42	2.37	3.62	3.29
chr1	2635641	2635876	chr1.capped.895	40	-	AT1G08350	0	proximal	UTR5	3.76	3.3	2.83	3.19	2.64	1.77	6.95	6.97	8.16
chr1	2636006	2636041	chr1.capped.896	29	+	AT1G08360	0	proximal	UTR5	297.86	308.84	297.39	452.38	248.45	337.36	314.77	274.04	246.76
chr1	2638167	2638313	chr1.capped.897	70	+	AT1G08370	0	proximal	UTR5	14.06	13.55	10	21.23	7.49	16.16	29.72	28.82	32.22
chr1	2640306	2640341	chr1.noncapped.898	15	+	AT1G08370	0	distal	CDS	0.72	0.84	1.47	0.9	0	0.21	0.12	0.32	0.16
chr1	2641743	2641833	chr1.capped.899	19	-	AT1G08380	0	proximal	UTR5	790	962.07	711.49	1130.92	904.88	955.07	1439.59	1166.81	1663.08
chr1	2642123	2642260	chr1.capped.900	81	+	AT1G08390	0	proximal	UTR5	9.04	6.72	7.32	12.54	4.55	13.05	13.8	10.09	16.11
chr1	2645974	2646075	chr1.capped.901	32	-	AT1G08400	0	proximal	CDS	1.33	1.34	0.98	2.18	0.61	1.21	2.45	1.65	1.65
chr1	2646148	2646309	chr1.capped.902	91	+	AT1G08410	0	proximal	UTR5	5.83	5.53	4.75	9.33	3.42	6.46	9.82	7.85	8.6
chr1	2649453	2649824	chr1.capped.903	305	+	AT1G08420	0	proximal	UTR5	4.81	6.01	4.5	5.44	5.99	4.2	6.58	6.02	7.76
chr1	2671813	2671829	chr1.capped.904	11	-	AT1G08450	0	proximal	UTR5	20.07	20.71	16.16	22.28	12.71	15.62	34.83	45.24	49.17
chr1	2672346	2672505	chr1.capped.905	152	+	AT1G08460	0	proximal	UTR5	1.44	3.55	4.28	3.09	1.93	6.39	7.65	7.6	7.03
chr1	2673973	2674085	chr1.capped.906	6	+	AT1G08460	0	distal	CDS	0.6	0.72	1.21	0.49	0.2	0.82	3.13	2.4	3.2
chr1	2675731	2675945	chr1.capped.907	113	+	AT1G08465	0	proximal	UTR5	15.64	14.89	11.42	22.72	18.64	40.34	14.56	15.86	11.01
chr1	2683967	2684105	chr1.capped.909	41	-	AT1G08470	0	proximal	UTR5	14.95	11.21	10.19	14.63	7.75	10.31	17.88	23.99	16.22
chr1	2684216	2684333	chr1.capped.908	73	+	AT1G08480	0	proximal	UTR5	90.2	53.97	60.15	69.46	52.5	91.3	133.67	103.93	198.7
chr1	2688516	2688605	chr1.capped.910	78	-	AT1G08490	0	proximal	UTR5	8.61	9.37	7.79	10.5	5.98	5.73	17.97	18.95	19.74
chr1	2688949	2689184	chr1.capped.911	150	+	AT1G08500	0	proximal	UTR5	2.85	3.17	1.45	2.39	0	2.43	1.94	3.8	3.28
chr1	2694104	2694267	chr1.capped.912	64	-	AT1G08510	0	proximal	UTR5	15.95	22.53	17.66	21.04	13.7	18.24	40.88	52.27	45.15
chr1	2694323	2694432	chr1.capped.913	42	-	AT1G08510	0	proximal	UTR5	207.79	122.06	70.66	235.23	265.13	275.15	106.56	224.47	94.13
chr1	2696395	2696543	chr1.capped.914	132	+	AT1G08520	0	proximal	UTR5	9.31	11	10.44	10.74	5.11	9.03	15.86	15.19	20.27
chr1	2697363	2697435	chr1.capped.915	2	+	AT1G08520	0	distal	CDS	0.41	0.4	0.36	0	0	0.17	0.7	0	0.81
chr1	2701166	2701263	chr1.capped.916	59	+	AT1G08530	0	proximal	UTR5	5.09	5.69	6.12	8.04	1.96	5.45	12.08	11.61	12.81
chr1	2703327	2703414	chr1.capped.917	39	+	AT1G08540	0	proximal	UTR5	9.96	8.56	5.79	9.15	3.49	11.14	16.25	15	13.98
chr1	2706877	2707218	chr1.capped.918	213	+	AT1G08550	0	proximal	UTR5	6.22	6.24	1.83	6.72	3.29	3.08	8.45	6.76	6.8
chr1	2709658	2709660	chr1.noncapped.919	1	+	AT1G08550	0	distal	UTR3	0	0.12	0.28	0	0	0.15	1.02	2.22	2.49
chr1	2710888	2711027	chr1.capped.920	20	-	AT1G08560	0	proximal	UTR5	19.21	33.21	23.02	21.28	21.82	14.16	45.05	33.29	26.9
chr1	2712848	2713059	chr1.capped.921	78	+	AT1G08570	0	proximal	UTR5	25.14	29.16	30.15	29.68	30.2	39.71	91.55	144.62	148.88
chr1	2716347	2716429	chr1.capped.922	18	-	AT1G08580	0	proximal	UTR5	56.82	68.13	92.77	68.58	68.99	61.36	65.88	63.16	73
chr1	2721902	2721946	chr1.capped.923	7	-	AT1G08592	0	single-exon	NC	3.54	4.22	5.79	2.83	5.46	5.82	9.53	5.39	3.76
chr1	2723687	2723857	chr1.capped.924	139	+	AT1G08600	0	proximal	UTR5	3.36	3.47	4.71	6.39	5.74	8.98	3.05	2.71	1.49
chr1	2733319	2733390	chr1.noncapped.925	43	+	AT1G08600	0	distal	CDS	0.7	0.64	0.7	0.04	0.88	0.29	0.07	0.06	0.32
chr1	2735692	2735821	chr1.capped.926	98	-	AT1G08610	0	proximal	UTR5	1.7	3.04	3.42	1.96	2.22	2	2.55	2.5	5
chr1	2736608	2737179	chr1.capped.927	144	+	AT1G08620	0	proximal	UTR5	4.02	4.65	4.5	5.74	5.99	13.24	3.57	7.14	6.13
chr1	2746424	2746648	chr1.capped.928	186	-	AT1G08630	-85	upstream	UTR5	0.97	1.02	1.18	2.99	0.56	0.06	1.77	1.47	0.56
chr1	2746693	2746795	chr1.capped.929	53	-	AT1G08630	0	proximal	UTR5	1.18	2.9	4.87	1.85	3.84	3.36	7.75	13.01	16.8
chr1	2746823	2747008	chr1.capped.930	137	-	AT1G08630	0	proximal	UTR5	1.24	3.26	5.03	1.07	1.31	2.89	11.18	8.39	8.06
chr1	2747899	2747936	chr1.capped.931	32	-	AT1G08630	0	proximal	UTR5	0	0.31	0.37	0	0	0.09	0.88	2.11	0.94
chr1	2751155	2751283	chr1.capped.932	53	-	AT1G08640	0	proximal	CDS	14.15	21.11	15.2	14.79	13.29	11.91	13.59	17.01	15.75
chr1	2752118	2752192	chr1.capped.933	42	+	AT1G08650	0	single-exon	UTR5	7.69	6.9	10.31	11.25	10.07	13.64	9.02	13.94	23.29
chr1	2759686	2759910	chr1.capped.934	99	-	AT1G08660	0	proximal	UTR5	9.62	9.95	9.37	9.43	5.05	8.43	13.42	14.27	15.37
chr1	2761744	2761867	chr1.capped.935	2	-	AT1G08670	-148	upstream	UTR5	0.13	0.05	0.58	0.27	0.24	0.14	0.35	0.88	0.86
chr1	2762585	2762725	chr1.capped.936	57	+	AT1G08680	0	proximal	UTR5	6.22	9.22	6.83	10.33	5.32	7.97	16.34	18.79	19.55
chr1	2769476	2769568	chr1.capped.937	39	-	AT1G08695	-8	upstream	UTR5	3.83	2.68	5.17	4.9	3.94	11.27	2.78	10.29	3.61
chr1	2771362	2771477	chr1.capped.938	80	-	AT1G08700	0	proximal	UTR5	7.25	7.42	7.75	8.85	9.06	6.94	10.72	12.79	12.57
chr1	2771624	2771763	chr1.capped.939	87	+	AT1G08710	0	proximal	UTR5	3.51	4.41	6.26	5.58	2.41	9.3	9.44	7.72	17.55
chr1	2773943	2774092	chr1.capped.940	85	+	AT1G08720	0	proximal	UTR5	2.39	2.18	2.32	1.99	3.87	6.42	2.91	2.77	4.06
chr1	2779483	2779673	chr1.capped.941	142	+	AT1G08730	0	proximal	UTR5	0.51	0.91	1.29	1.56	0.8	2.32	1.43	2.21	0.7
chr1	2801022	2801102	chr1.capped.942	46	+	AT1G08750	0	proximal	UTR5	6.22	6.32	5.94	8.17	3.52	4.8	15.54	12.98	10.45
chr1	2804972	2805266	chr1.capped.943	159	+	AT1G08760	0	proximal	UTR5	1.54	1.76	2.5	2.24	3.04	4.26	1.95	2.04	1.11
chr1	2805296	2805394	chr1.capped.944	74	+	AT1G08760	0	proximal	UTR5	1.52	1.6	1.93	3.02	1.09	3.03	2.72	3.64	4.76
chr1	2806362	2806382	chr1.noncapped.945	11	+	AT1G08760	0	proximal	CDS	0	0.04	0.07	0.25	0	0	0.52	0.07	0.7
chr1	2808870	2808914	chr1.capped.946	1	+	AT1G08770	0	single-exon	UTR5	11.2	16	13.98	20.24	13.04	22.37	29.63	31.91	40.14
chr1	2811120	2811231	chr1.capped.947	57	-	AT1G08780	0	proximal	UTR5	21.17	24.35	28.2	15.84	19.67	16.3	23.3	26.73	25.05
chr1	2817766	2817941	chr1.capped.948	39	-	AT1G08800	0	proximal	UTR5	1.35	1.01	1.09	1.14	0.82	0.75	2.57	2.12	1.19
chr1	2820333	2820403	chr1.capped.949	17	-	AT1G08810	0	proximal	UTR5	1.98	1.46	2.09	2.26	1.24	1.14	2.99	2.82	2.51
chr1	2824861	2824901	chr1.capped.950	35	-	AT1G08820	0	proximal	UTR5	0.29	0.33	0.1	0.5	0	0	0.24	0.49	1.25
chr1	2825199	2825467	chr1.capped.951	61	-	AT1G08820	0	proximal	UTR5	9.41	14.42	12.42	11.61	11.2	16.1	25.23	26.94	20.36
chr1	2827061	2827134	chr1.capped.952	56	+	AT1G08830	0	proximal	UTR5	170.61	156.63	175.42	360.39	136.16	305.71	1155.02	824.01	1119.24
chr1	2831048	2831183	chr1.capped.953	55	-	AT1G08840	-16	intron	CDS	9.31	7.18	8.38	12.08	3.21	5.82	10.96	12.13	11.07
chr1	2838815	2838890	chr1.capped.954	53	-	AT1G08840	-14	upstream	UTR5	0.56	0.7	0.57	0.76	0.86	0.21	0.24	0.4	0.08
chr1	2839044	2839180	chr1.capped.955	99	+	AT1G08845	0	proximal	CDS	4.68	5.67	7.5	13.19	3.88	9.21	8.55	9.07	13.81
chr1	2847752	2847782	chr1.capped.956	25	-	AT1G08880	0	proximal	UTR5	75.7	102.03	90.84	90.49	63.68	58.26	87.64	97.31	75.04
chr1	2848259	2848366	chr1.capped.957	90	+	AT1G08890	0	proximal	UTR5	3.93	1.69	0.31	3.84	0.97	0.49	0.15	0.49	0.4
chr1	2852421	2852545	chr1.capped.958	32	+	AT1G08900	0	proximal	UTR5	0.77	1	1.04	0.16	1.01	1.25	4.26	4.03	2.26
chr1	2856160	2856173	chr1.capped.959	1	+	AT1G08910	0	proximal	UTR5	6.57	6	6.21	5.2	7.39	11.81	7.7	6.83	4.28
chr1	2867257	2867442	chr1.capped.960	97	+	AT1G08920	0	proximal	UTR5	3.47	2.9	1.58	3.68	1.35	3.49	2.16	3.7	5.24
chr1	2873420	2873586	chr1.noncapped.961	71	+	AT1G08930	0	proximal	UTR5	1.27	0.53	0.42	2.34	4.64	5.39	0.86	1.7	0.48
chr1	2877611	2877762	chr1.capped.962	65	+	AT1G08940	0	proximal	UTR5	1.37	1.09	1.25	1.85	1.52	1.04	1.7	2.73	3.68
chr1	2879296	2879417	chr1.noncapped.963	6	+	AT1G08950	0	single-exon	NC	0.28	0.09	0	0.65	0.39	1.43	0	0.18	0
chr1	2879563	2879685	chr1.capped.964	78	+	AT1G08960	0	proximal	UTR5	3.64	2.87	2.49	3.91	0.95	2	6.78	4.19	9.23
chr1	2882488	2882654	chr1.capped.965	54	+	AT1G08970	0	single-exon	UTR5	22.08	20.23	18.67	26.49	19.39	28.62	35.76	48.75	48.1
chr1	2884373	2884464	chr1.capped.966	37	+	AT1G08980	0	proximal	UTR5	6.71	11.13	6.87	10.48	5.1	7.92	16.97	25.4	23.96
chr1	2890992	2891143	chr1.capped.967	108	+	AT1G09000	0	proximal	UTR5	0.46	0.46	0.44	0.07	0.25	0.68	1.89	1.37	1.27
chr1	2899285	2899411	chr1.capped.968	86	-	AT1G09010	0	proximal	UTR5	5.44	5.39	3.29	5.93	1.83	3.08	10.38	11.89	8.85
chr1	2904762	2904873	chr1.capped.969	58	-	AT1G09020	0	proximal	UTR5	8.8	9.55	7.3	8.48	3.61	6.28	5.87	9.22	10.37
chr1	2911262	2911337	chr1.capped.970	54	+	AT1G09040	0	proximal	UTR5	1.18	1.3	0	1.05	0	0.61	1.02	0	0
chr1	2916916	2917036	chr1.capped.971	99	+	AT1G09050	0	proximal	UTR5	0.23	0.06	0.87	0.94	0.38	0.61	1	1.87	1.49
chr1	2921244	2921264	chr1.noncapped.972	17	-	AT1G09060	0	distal	CDS	0.29	0	0.33	0.22	0	0.18	0.73	0.46	0.4
chr1	2925717	2925790	chr1.capped.973	38	-	AT1G09060	0	proximal	UTR5	1.03	1.4	2.71	0.86	1.69	1.99	2.64	3.6	1.41
chr1	2925842	2926011	chr1.capped.974	56	-	AT1G09060	-73	upstream	UTR5	10.69	3.88	3.37	14.72	31.81	15.36	9.03	13.17	14.54
chr1	2927670	2927739	chr1.capped.975	32	+	AT1G09070	0	single-exon	UTR5	29.19	45.38	108.56	51.77	73	173.03	71.37	99.56	180.71
chr1	2931837	2931851	chr1.capped.976	9	-	AT1G09080	0	proximal	UTR5	0.04	0.04	0	0	0	0	0.15	0.88	1.1
chr1	2939271	2939329	chr1.capped.977	15	-	AT1G09100	0	proximal	UTR5	7	7.96	9.11	7.95	7.66	7.21	8	6.7	7.02
chr1	2940363	2940396	chr1.noncapped.978	15	-	AT1G09130	0	distal	CDS	2.07	1.73	1.76	0.86	0.49	0.08	1.25	0.54	0.48
chr1	2942246	2942267	chr1.capped.979	7	-	AT1G09130	0	proximal	UTR5	41.59	52.32	32.46	49.48	39.55	31.8	110.27	85.89	47.75
chr1	2945856	2945976	chr1.capped.980	94	-	AT1G09140	0	proximal	UTR5	19.84	27.3	24.56	26.76	18.28	21.61	34.5	43.13	32.36
chr1	2946182	2946303	chr1.capped.981	67	+	AT1G09150	0	proximal	UTR5	26.86	28.46	29.13	36.41	11.27	42.53	45.28	36.91	56.2
chr1	2948053	2948126	chr1.capped.982	19	+	AT1G09150	-101	intron	CDS	0.1	0.17	0.16	0.76	0.26	0.73	0.06	0.11	0
chr1	2950823	2951172	chr1.capped.983	107	-	AT1G09155	0	proximal	UTR5	0.74	4.37	2.16	1.01	3.54	1.53	0.05	3.57	0.08
chr1	2953971	2954039	chr1.capped.984	61	-	AT1G09160	-62	intron	CDS	0.22	0.35	0.09	0.03	0	0.43	0.97	0.8	0.64
chr1	2955672	2955705	chr1.capped.985	17	-	AT1G09160	0	proximal	UTR5	11.65	17.53	15.5	14.48	8.25	13.02	27.75	28.11	22.46
chr1	2964616	2964733	chr1.capped.986	1	-	AT1G09176	0	antisense	UTR3	0.08	0	0.28	0	0	0.36	0.51	0.26	0.63
chr1	2965009	2965046	chr1.capped.987	1	+	AT1G09180	-12	upstream	UTR5	2.23	1.47	1.25	1.81	2.02	3.21	6.15	5.33	5.93
chr1	2967684	2967788	chr1.capped.988	44	-	AT1G09190	0	single-exon	UTR5	1.03	0.79	0.58	0.89	0	0.39	1.62	1.73	1.81
chr1	2971338	2971550	chr1.capped.989	133	-	AT1G09195	0	proximal	UTR5	1.46	1.6	1.52	1.59	0.95	0.99	3.84	4.5	4.07
chr1	2972197	2972199	chr1.capped.990	1	-	AT1G09200	0	single-exon	UTR5	190.3	259.88	193.82	308.19	160.18	202.97	365.19	337.13	286.23
chr1	2976682	2976750	chr1.capped.991	13	-	AT1G09210	0	proximal	UTR5	81.38	96.21	80.5	84.05	54.27	86.3	209.71	226.49	184.63
chr1	2977191	2977383	chr1.capped.992	93	+	.	.	intergenic	.	0.12	0.49	0.79	0.54	0.82	0.43	2.27	1.53	2.8
chr1	2982535	2982624	chr1.capped.993	46	-	AT1G09230	0	proximal	UTR5	3.1	4.71	4.65	5.36	4.14	2.21	8.84	9.87	11.02
chr1	2984878	2984911	chr1.capped.994	2	+	AT1G09240	0	single-exon	UTR5	1.24	0.83	0.66	0.58	1.14	0.71	0.63	2.94	4.14
chr1	2987385	2987473	chr1.capped.995	7	-	AT1G09245	0	single-exon	UTR5	1.95	0.59	2.63	2.69	2.25	3.58	1.31	12.86	4.6
chr1	2989370	2989393	chr1.capped.996	6	+	AT1G09250	0	single-exon	UTR5	12.08	12.3	16.05	14.02	11.23	22.37	47.36	69.47	72.91
chr1	2990336	2990518	chr1.capped.997	99	-	.	.	intergenic	.	0.31	0.29	0.28	1.15	0	0	0.55	0.82	0.55
chr1	2993372	2993406	chr1.capped.998	4	+	AT1G09260	-4	upstream	UTR5	0	0.2	1.3	0	0.26	0.37	0.61	1.19	0
chr1	2994293	2994455	chr1.capped.999	129	+	AT1G09270	0	proximal	UTR5	21.17	17.4	11.87	27.03	18.64	30.56	43.52	39.81	51.7
chr1	3001233	3001376	chr1.capped.1000	46	-	AT1G09280	0	proximal	UTR5	4.3	4.51	4.88	3.5	3.99	3.76	6.49	7.37	8.13
chr1	3002066	3002071	chr1.noncapped.1001	4	-	AT1G09290	0	distal	CDS	1.33	1.68	1.44	2.42	1.07	1.23	1.02	1.07	10.91
chr1	3003693	3003762	chr1.capped.1003	68	-	AT1G09290	0	single-exon	UTR5	2.42	4.71	3.02	4.8	6.4	2.77	7.34	5.06	5.16
chr1	3003824	3003980	chr1.capped.1002	79	+	AT1G09300	0	single-exon	UTR5	2.14	2.73	3.63	2.82	0.97	4.78	1	1.1	1.49
chr1	3008877	3008947	chr1.capped.1004	41	+	AT1G09310	0	single-exon	UTR5	0.07	0.18	0.05	0.78	0.6	0	0.07	0.15	0.32
chr1	3009055	3009064	chr1.capped.1005	1	+	AT1G09310	0	single-exon	UTR5	221.3	132.67	153.8	218.51	115.26	156.67	233.23	146.06	287.95
chr1	3012264	3012413	chr1.capped.1006	100	-	AT1G09320	0	proximal	UTR5	2.36	4.3	2.62	3.11	2.87	1.31	5.68	7.05	7.03
chr1	3015002	3015130	chr1.capped.1007	58	-	AT1G09330	0	proximal	UTR5	31.08	39.68	35.35	43.58	29.63	39.75	82.04	81.24	93.79
chr1	3015242	3015473	chr1.capped.1008	218	+	AT1G09340	0	proximal	UTR5	93.66	72.72	70.23	153.18	41.03	110.26	151.51	133.13	216.21
chr1	3024854	3024902	chr1.capped.1009	3	+	AT1G09370	-19	upstream	UTR5	0	0	0.05	0.59	0.9	0.17	0	0	0
chr1	3025152	3025452	chr1.noncapped.1010	67	+	AT1G09370	0	single-exon	CDS	0	0	0	0.29	4.12	0.86	0	0	0
chr1	3026203	3026382	chr1.noncapped.1011	93	-	AT1G09380	0	distal	UTR3	5.65	2.74	4.59	2.02	6.04	6.29	0.22	0.83	1.25
chr1	3026389	3026485	chr1.noncapped.1012	26	-	AT1G09380	0	distal	CDS	1.1	1.42	3.1	1.3	1.75	2.17	1.37	0.9	0.79
chr1	3026521	3026568	chr1.capped.1013	1	-	AT1G09380	0	distal	CDS	0.93	0.19	1.14	0.52	0.83	1.31	0.03	1.19	0.08
chr1	3026646	3026743	chr1.noncapped.1014	94	-	AT1G09380	0	distal	CDS	0.67	1.1	1.93	1.45	1.66	2.82	0.9	0.6	0.95
chr1	3029479	3029490	chr1.capped.1015	8	-	AT1G09380	0	proximal	UTR5	10.46	2.09	5.04	18.36	19.15	39.98	9.91	20.31	23.46
chr1	3031122	3031329	chr1.capped.1016	119	+	AT1G09390	0	single-exon	UTR5	3.79	6.22	4.13	6.86	1.7	9.44	8.7	9.48	8.08
chr1	3038273	3038441	chr1.capped.1017	114	-	AT1G09415	0	single-exon	UTR5	6.17	9.92	12.81	11.39	12.77	10.09	9.33	15.36	11.13
chr1	3041679	3041832	chr1.capped.1018	49	-	AT1G09420	0	proximal	UTR5	1.59	2.18	1.93	1.1	1.35	1.66	2.32	2.63	2.44
chr1	3041937	3042097	chr1.capped.1019	115	+	AT1G09430	0	proximal	UTR5	18.88	14.13	13.56	20.94	8.55	17.58	40.06	37.23	41.88
chr1	3047430	3047604	chr1.capped.1020	70	-	AT1G09440	0	proximal	UTR5	1.7	3.21	1.86	3.18	4.23	1.9	4.28	3.79	2.19
chr1	3047783	3048070	chr1.capped.1021	102	-	AT1G09440	0	proximal	UTR5	0.56	1.31	1.04	1.64	1.91	2.29	3.42	3.65	6.17
chr1	3048965	3049143	chr1.capped.1022	68	+	AT1G09450	0	proximal	UTR5	1.75	2.29	1.55	1.62	2.09	1.55	0.89	1.11	2.83
chr1	3053500	3053906	chr1.capped.1023	380	+	AT1G09460	0	proximal	UTR5	1.92	1.96	3.47	1.91	1.69	4.59	7.02	3.54	6.07
chr1	3056927	3056956	chr1.capped.1024	8	-	AT1G09470	0	proximal	UTR5	0.84	1.17	0.7	1.3	1.4	0.95	2.24	1.68	1.33
chr1	3056995	3057246	chr1.capped.1025	146	-	AT1G09470	-145	upstream	UTR5	2.83	4.98	2.92	5.19	4.14	3.1	4.64	5.01	5.03
chr1	3057375	3057537	chr1.capped.1026	87	-	AT1G09470	0	proximal	UTR5	0.54	1.01	0.79	0.24	0.6	0.35	0.49	0.81	1.96
chr1	3058466	3058526	chr1.capped.1027	17	+	AT1G09480	0	proximal	CDS	0.48	0.46	0.48	0.46	0.21	0.36	0.45	0.53	0.86
chr1	3062421	3062490	chr1.noncapped.1028	1	-	.	.	intergenic	.	0	0.47	0.23	0	0	0	0.06	1.28	0.55
chr1	3063346	3063406	chr1.capped.1029	50	-	.	.	intergenic	.	2.4	3.18	5.51	2.17	3.85	2.73	7.71	8.93	6.67
chr1	3064096	3064165	chr1.capped.1030	64	+	AT1G09490	0	proximal	UTR5	18.58	12.4	9.84	19.97	8.4	14.15	18.73	14.1	21.81
chr1	3066678	3066851	chr1.capped.1031	74	+	AT1G09500	0	proximal	UTR5	1.43	1.01	0.89	2.72	1.65	0.61	2.47	1.96	3.13
chr1	3072028	3072083	chr1.capped.1032	21	-	AT1G09520	0	single-exon	UTR5	8.67	11.63	17.67	11.22	17.44	11.4	14.44	16.15	18.35
chr1	3076473	3076727	chr1.capped.1033	76	+	AT1G09530	0	proximal	UTR5	1.76	1.4	2.38	1.97	0.96	2.09	1.82	3.72	4.16
chr1	3093712	3093895	chr1.capped.1034	132	+	AT1G09560	0	proximal	UTR5	19.14	14.33	20.98	22.9	14.13	30.77	33.6	28.88	32.54
chr1	3100198	3100314	chr1.capped.1035	67	-	AT1G09570	0	proximal	UTR5	1.89	1.95	1.18	2.02	1.17	2.26	2.58	2.68	1.66
chr1	3100319	3100365	chr1.capped.1036	38	-	AT1G09570	-1	upstream	UTR5	0.62	0.76	0.56	0.24	0.59	0.33	0.61	0.97	0.56
chr1	3100488	3100824	chr1.capped.1037	136	-	AT1G09570	0	proximal	UTR5	2.3	2.65	2.38	2.55	1.85	1.47	2.82	4.17	1.98
chr1	3102826	3102959	chr1.capped.1038	98	-	AT1G09575	0	proximal	UTR5	0.96	1.4	2.09	0.79	3.46	4.2	2.12	2.08	1.64
chr1	3103023	3103275	chr1.capped.1039	125	-	AT1G09575	0	proximal	UTR5	0.46	1.08	0.77	0	1.56	0.31	1.09	2.29	0.71
chr1	3103691	3103777	chr1.capped.1040	62	-	AT1G09575	-77	upstream	UTR5	0.87	0.2	0.49	0.28	0	1	0.35	2.4	1.02
chr1	3104567	3104638	chr1.capped.1041	15	+	AT1G09580	0	proximal	UTR5	9.87	12.75	13.93	25.06	10.02	18.31	17.63	18.74	17.48
chr1	3106530	3106541	chr1.capped.1042	4	+	AT1G09590	0	proximal	UTR5	361.56	409.56	394.83	956.32	407.72	461.86	1051.14	536.86	588.94
chr1	3107899	3108367	chr1.capped.1043	335	+	AT1G09600	0	proximal	UTR5	2.78	2.07	3.24	2.98	3.45	9.47	2.48	4.32	2.45
chr1	3111751	3111803	chr1.capped.1044	3	+	AT1G09610	0	single-exon	UTR5	1.4	2.72	2.48	1.46	2.07	3.67	5.03	5.04	14.02
chr1	3116620	3116706	chr1.capped.1045	69	-	AT1G09620	0	proximal	UTR5	20.89	24.17	26.46	15.62	16.85	17.37	16.96	19.57	15.85
chr1	3119564	3119747	chr1.capped.1047	47	-	AT1G09630	0	proximal	UTR5	17.36	21.57	16.68	17.79	14.63	13.56	28.83	28.86	27.14
chr1	3119878	3119985	chr1.capped.1046	85	+	AT1G09640	0	proximal	UTR5	36.25	36.92	52.53	39.09	19.81	32.8	57.3	63.39	54.78
chr1	3122911	3123096	chr1.capped.1048	115	+	AT1G09645	0	proximal	UTR5	10.78	11.52	18.67	13.94	10.73	18.69	26.34	33.2	34.88
chr1	3125147	3125323	chr1.capped.1049	144	+	AT1G09650	0	single-exon	UTR5	0.49	1.11	0.69	0.26	0.49	1.07	0.41	0.57	0.55
chr1	3125424	3125498	chr1.capped.1050	69	+	AT1G09650	0	single-exon	UTR5	3.01	1.2	1.66	2.3	0.44	2.02	3.94	1.71	1.41
chr1	3125788	3125907	chr1.capped.1051	85	+	AT1G09650	0	single-exon	UTR5	0.17	0.22	0.49	0.09	0	0.21	0.73	0.48	1.58
chr1	3125946	3126005	chr1.capped.1052	11	+	AT1G09650	0	single-exon	UTR5	0.07	0.1	0.29	0	0.29	0	0.52	0.57	1.03
chr1	3130651	3130654	chr1.capped.1053	2	-	AT1G09660	-469	intron	CDS	0.98	1.53	0.21	1.59	2.13	1.48	0.65	0.31	0.16
chr1	3130947	3131098	chr1.capped.1054	117	-	AT1G09660	0	proximal	UTR5	11.08	12.57	15.98	19.36	10.12	14.49	21.42	18.13	19.4
chr1	3135916	3135988	chr1.capped.1055	51	-	AT1G09680	0	single-exon	UTR5	0	0.33	0.38	0.27	0.72	0.12	1.48	1.03	0.96
chr1	3137458	3137476	chr1.capped.1056	9	-	AT1G09690	0	proximal	UTR5	435.77	576.47	558.6	743.19	473.72	524.51	908.92	602.07	1061.35
chr1	3140192	3140320	chr1.capped.1057	46	-	AT1G09700	0	proximal	UTR5	7.47	8.28	5.07	10.69	6.09	9.93	15.61	10.09	15.68
chr1	3140844	3140927	chr1.capped.1058	43	+	AT1G09710	0	proximal	UTR5	1.34	1.93	1.39	0.85	0.64	1.69	1.61	1.74	1.95
chr1	3148335	3148376	chr1.noncapped.1059	2	-	AT1G09730	0	distal	CDS	0.1	0.63	0.63	0.25	0.48	0.09	0.07	0.23	0
chr1	3154287	3154392	chr1.capped.1060	92	-	AT1G09730	0	proximal	UTR5	4.93	4.8	5.16	3.26	2.83	3.43	10.77	8.39	8.04
chr1	3154510	3154594	chr1.capped.1061	26	+	AT1G09740	0	proximal	UTR5	0.52	0.93	0.74	0.84	0.55	0.73	0.26	0.68	1.88
chr1	3157499	3157541	chr1.capped.1062	4	+	AT1G09750	0	proximal	UTR5	19.09	25.39	29.52	32.43	10.9	30.15	12.88	17.07	17.08
chr1	3161642	3161708	chr1.capped.1063	49	-	AT1G09760	0	proximal	UTR5	17.15	23.88	21.6	18.28	17.87	11.32	37.18	26.97	23.62
chr1	3161813	3161923	chr1.capped.1064	54	+	AT1G09770	0	proximal	UTR5	17.71	19.76	18.51	18.8	11.17	18.71	15.65	18.26	16.79
chr1	3165426	3165431	chr1.noncapped.1065	2	-	AT1G09780	0	distal	UTR3	4.44	1.04	0.09	3.74	5.54	2.85	0.22	0	0.93
chr1	3167814	3167876	chr1.capped.1066	54	-	AT1G09780	0	proximal	UTR5	39.88	36.17	21.38	32.81	17.12	21.45	27.46	32.33	30.54
chr1	3170909	3171094	chr1.capped.1067	148	-	AT1G09790	-40	upstream	UTR5	1.18	0.94	1.93	0.08	0.45	1.63	0.2	2.94	1.58
chr1	3172087	3172178	chr1.capped.1068	30	+	AT1G09794	0	proximal	UTR5	7.31	6.39	6.2	14.29	7.81	8.21	18.28	10.71	8.51
chr1	3173540	3173575	chr1.capped.1069	8	+	AT1G09795	0	single-exon	UTR5	22.94	30.18	18.23	51.58	17.11	26.02	33.03	26.29	20.74
chr1	3180319	3180474	chr1.capped.1070	57	-	AT1G09800	0	proximal	UTR5	2.42	1.57	1.89	1.68	2.79	0.24	1.88	2.08	2.92
chr1	3180555	3180735	chr1.noncapped.1071	178	-	AT1G04733	0	proximal	NC	15.77	15.45	10.06	18.06	76.23	14.18	13.21	25.96	10.22
chr1	3180960	3180970	chr1.noncapped.1072	1	+	AT1G09810	0	antisense	UTR3	0	0	0.05	0.08	0.4	0	0.38	0.48	0.62
chr1	3184123	3184214	chr1.capped.1073	65	-	AT1G09810	0	proximal	UTR5	2.88	4.5	4.44	7.51	5	4.21	8.95	7.54	6.32
chr1	3187449	3187462	chr1.capped.1074	5	+	AT1G09812	0	proximal	UTR5	0.31	1.15	1.48	0.83	0.24	0.8	0.77	1.96	2.9
chr1	3189367	3189449	chr1.capped.1075	27	+	AT1G09815	0	proximal	UTR5	20.23	20.96	23.82	24.11	22.91	32.15	52.42	38	50.14
chr1	3192385	3192559	chr1.capped.1076	87	-	AT1G09820	0	single-exon	UTR5	1.13	1.24	1.13	0.74	2.19	1.27	2.87	3.23	2.57
chr1	3192962	3192999	chr1.noncapped.1077	4	-	AT1G09830	0	distal	CDS	0.23	0.5	0.5	3.12	2.36	2.2	0.38	0	0.24
chr1	3194917	3195057	chr1.capped.1078	107	-	AT1G09830	0	proximal	UTR5	5.52	7.95	6.1	7.06	3.58	3.34	7.1	6.3	8.83
chr1	3195984	3196020	chr1.noncapped.1079	24	+	AT1G09840	0	antisense	UTR3	0.79	0.56	0.9	0.88	1.35	1.13	6.21	3.54	3.43
chr1	3200046	3200296	chr1.capped.1080	180	-	AT1G09840	0	proximal	UTR5	8.89	11.37	6.78	10.17	8.51	11.8	25.75	26.05	41.16
chr1	3201736	3201910	chr1.capped.1081	91	+	AT1G09850	0	single-exon	UTR5	9.11	6.63	5	21.6	6.2	10.16	15.52	15.77	25.9
chr1	3205293	3205389	chr1.capped.1082	24	-	AT1G09860	0	single-exon	UTR5	0	0.13	0	0	0.35	0	0.99	1.15	0.32
chr1	3205702	3205813	chr1.capped.1083	64	+	AT1G09870	0	proximal	UTR5	10.5	10.3	8.54	18.86	4.29	19.25	23.02	26.55	36.16
chr1	3213111	3213179	chr1.capped.1084	62	-	AT1G09880	-902	intron	CDS	0.8	0.77	0.39	0.11	0	0.06	0.92	0.94	0
chr1	3217566	3217637	chr1.capped.1085	13	-	AT1G09890	0	proximal	UTR5	0.28	0.2	0.34	0.22	0	0.18	0.48	1.3	1.57
chr1	3217963	3218052	chr1.capped.1086	36	+	AT1G09900	-133	upstream	UTR5	2.1	3.14	2.9	1.91	0.67	1.12	4.62	3.61	6.02
chr1	3219391	3219416	chr1.noncapped.1087	19	+	AT1G09900	0	single-exon	CDS	0.17	0	0.18	0	0.57	0.63	0.27	0	0.16
chr1	3224125	3224162	chr1.capped.1088	3	+	AT1G09910	0	antisense	CDS	0.14	0.09	0.87	0.29	0.35	0.51	0.82	1.13	1.88
chr1	3224461	3224649	chr1.capped.1089	77	-	AT1G09910	0	proximal	UTR5	1.56	2.02	1.2	1.72	2	1.53	2.62	3.2	2.23
chr1	3226947	3227072	chr1.capped.1090	29	-	AT1G09920	0	proximal	UTR5	14.59	16.12	18.81	18.23	11.55	22.71	36.37	37.87	33.05
chr1	3230035	3230206	chr1.capped.1091	98	-	AT1G09930	0	proximal	UTR5	0.06	0.42	0.52	0.1	0.39	0.35	0.75	0.95	0.63
chr1	3239379	3239659	chr1.capped.1092	53	-	AT1G09940	0	proximal	UTR5	4.93	7.83	4.15	4.29	4.78	6.15	4.14	8.11	4.14
chr1	3244063	3244289	chr1.capped.1093	144	+	AT1G09960	0	proximal	UTR5	1.8	1.34	1.57	1.12	0.65	0.44	4.1	4.58	5.71
chr1	3252212	3252341	chr1.capped.1094	27	+	AT1G09970	0	proximal	UTR5	1.56	1.64	1.25	1.71	1.89	8.04	5.32	7.1	6.22
chr1	3261478	3261753	chr1.capped.1095	173	-	AT1G09980	0	proximal	UTR5	5.11	4.98	3.57	4.43	4.17	3.85	6.89	8.73	10.02
chr1	3263481	3263654	chr1.capped.1096	116	-	AT1G09995	0	proximal	UTR5	5.97	6.14	7.43	7.78	5.41	6.93	10.4	10.14	8.62
chr1	3263867	3263968	chr1.capped.1097	45	+	AT1G10000	0	antisense	CDS	0.67	0.33	0.53	0.58	0.17	0.13	0.23	0.92	1.58
chr1	3269751	3269763	chr1.capped.1098	11	-	AT1G10020	0	distal	UTR3	0.15	0	0	0.79	0	0.76	0.32	0.08	0.16
chr1	3271797	3271854	chr1.capped.1099	50	-	AT1G10020	0	proximal	UTR5	2.52	1.27	1.2	2.47	0.51	1.75	1.42	1.77	2.74
chr1	3271942	3272063	chr1.capped.1100	22	-	AT1G10020	0	proximal	UTR5	13.56	15.37	14.75	11.44	14.35	13.59	23.06	23.84	13.73
chr1	3273739	3273945	chr1.capped.1101	115	+	AT1G10030	0	proximal	UTR5	18.7	15.28	20.04	27.34	18.06	36.74	33.64	24.71	42.68
chr1	3278653	3278709	chr1.capped.1102	55	-	AT1G10040	0	proximal	UTR5	0.7	0.43	0.36	0	0.29	0.06	0.81	0.7	0.63
chr1	3278897	3279044	chr1.capped.1103	54	+	AT1G10050	0	proximal	UTR5	1.38	0.4	0.57	1.08	4.62	3.61	0.98	2.08	1.49
chr1	3283695	3283749	chr1.noncapped.1104	7	-	.	.	intergenic	.	0.34	0.35	0.11	0.51	1.63	1.05	0.34	0.07	0
chr1	3284120	3284334	chr1.capped.1105	190	+	AT1G10060	0	proximal	CDS	56.7	42.42	23.36	88.85	22.88	37.91	29.67	24.97	49.43
chr1	3284396	3284423	chr1.capped.1106	23	+	AT1G10060	0	proximal	CDS	2.05	1.47	0.87	3.31	0.95	0.62	1.04	0.64	0.78
chr1	3284820	3284980	chr1.capped.1107	75	+	AT1G10060	0	proximal	CDS	0.71	0.34	0.39	0.41	0	0.17	0.79	0.33	1.03
chr1	3285043	3285160	chr1.capped.1108	104	+	AT1G10060	0	proximal	CDS	0.97	1.81	2.46	2.44	1.84	2.17	4.85	3.14	3.14
chr1	3287876	3287998	chr1.capped.1109	79	+	AT1G10070	-131	upstream	UTR5	1.14	0.14	0.65	2.05	0.95	3.1	1.22	4	1.03
chr1	3288048	3288290	chr1.capped.1110	173	+	AT1G10070	0	proximal	UTR5	5.36	5.22	7.14	6.41	5.96	4.23	5.43	13.84	6.43
chr1	3295994	3296283	chr1.capped.1111	108	-	AT1G10090	0	proximal	UTR5	5.81	5.25	4.74	2.39	2.11	2.74	3.08	4.46	3.37
chr1	3302597	3302742	chr1.capped.1112	131	+	AT1G10110	0	single-exon	UTR5	0.33	0.43	0.48	0.79	0.21	0.26	0.7	0.67	1.26
chr1	3306018	3306075	chr1.capped.1113	52	-	AT1G10120	0	proximal	UTR5	4.08	5.42	4.87	5.03	4.86	4.34	19.04	16.23	14.51
chr1	3306114	3306410	chr1.capped.1114	43	-	AT1G10120	0	proximal	UTR5	5.36	5.26	5.69	6.63	3.67	2.95	8.99	9.23	7.05
chr1	3306454	3306665	chr1.capped.1115	183	-	AT1G10120	0	proximal	UTR5	1.63	1.99	1.02	1.65	1.52	1.89	1.86	3.06	1.26
chr1	3306810	3306824	chr1.capped.1116	5	-	AT1G10120	0	proximal	UTR5	0.09	0.16	0.21	0.05	0	0.75	0.69	0.88	1.17
chr1	3310929	3311009	chr1.capped.1117	56	+	AT1G10130	0	proximal	UTR5	3.19	2.63	2.62	5.96	1.78	3.63	5.01	5.67	5.54
chr1	3321966	3321975	chr1.noncapped.1118	4	+	AT1G10130	0	distal	UTR3	0	0	0.13	0.59	0.73	0	0	0	0
chr1	3323393	3323666	chr1.capped.1119	154	-	AT1G10140	0	single-exon	UTR5	1.83	2.18	2.34	4.93	6.28	4.11	2.51	4.85	2.74
chr1	3325812	3325935	chr1.capped.1120	24	+	AT1G10150	0	single-exon	UTR5	5.69	4.87	6.58	5.73	5.11	7.66	6.05	11.69	6.52
chr1	3325994	3326027	chr1.capped.1121	25	+	AT1G10150	0	single-exon	UTR5	0.24	0.32	0.8	1.33	0.35	0	0	1.18	0.47
chr1	3328455	3328533	chr1.capped.1122	22	-	AT1G10155	-30	upstream	UTR5	0.15	0.14	0.42	0.38	0.31	0.72	0.86	1.38	0.63
chr1	3338056	3338189	chr1.capped.1123	3	-	AT1G10170	0	proximal	UTR5	5.83	7.03	8.7	4.74	5.95	4.36	1.56	3.02	1.4
chr1	3341528	3341641	chr1.capped.1124	45	-	AT1G10180	0	proximal	UTR5	6.26	5.59	5.74	7.52	5.81	3.2	10.94	10.23	8.43
chr1	3347750	3347912	chr1.capped.1125	107	-	AT1G10200	0	proximal	UTR5	43.51	49.25	23.26	58.91	17.16	25.76	46.64	47.17	37.44
chr1	3347995	3348163	chr1.capped.1126	95	-	AT1G10200	0	proximal	UTR5	0.67	0.49	0.12	0.5	0.43	0.08	0.49	0.22	1.34
chr1	3349187	3349260	chr1.capped.1127	53	+	AT1G10210	0	proximal	UTR5	2.64	2.25	2.74	2.4	1.38	1.94	3.87	4.13	2.59
chr1	3351973	3352134	chr1.capped.1128	78	+	AT1G10220	0	single-exon	UTR5	0.11	0.22	0.24	1.1	0.22	2.13	0.37	0.23	0.55
chr1	3355565	3355627	chr1.capped.1129	28	+	AT1G10230	-81	upstream	UTR5	14.42	14.46	23.39	18.51	13.38	13.57	29.19	25.26	27.54
chr1	3359679	3359868	chr1.capped.1130	158	-	AT1G10240	0	proximal	UTR5	0.95	2.27	2.3	2.08	0.84	1.42	2.82	3.74	2.58
chr1	3363412	3363530	chr1.capped.1131	32	+	AT1G10270	0	single-exon	UTR5	4.15	3.11	2.1	5.13	2.29	3.04	2.68	1.95	3.04
chr1	3369034	3369166	chr1.capped.1132	71	-	AT1G10280	0	proximal	UTR5	1.69	2.13	1.81	2	2.91	1.53	8.79	7.35	8.83
chr1	3370424	3370590	chr1.capped.1133	136	+	AT1G10290	0	proximal	UTR5	13.83	13.92	8.71	17.98	10.01	12.64	13.42	14.19	19.18
chr1	3383889	3383935	chr1.capped.1134	16	-	AT1G10310	0	proximal	UTR5	17.93	15.84	12.38	25.3	13.34	23.13	36.17	26.37	36.92
chr1	3384056	3384137	chr1.noncapped.1135	59	-	AT1G10310	-113	upstream	UTR5	0.52	0.28	0.06	0	0	0.38	0.79	1.2	0.47
chr1	3388369	3388398	chr1.capped.1136	21	-	AT1G10320	-15	upstream	UTR5	4.22	4.34	3.47	6.93	9.7	5.71	6.99	7.27	5.54
chr1	3388533	3388627	chr1.capped.1137	31	+	AT1G10330	-34	upstream	UTR5	0.9	0.82	0.13	1.15	0	0.54	2.18	0.99	1.57
chr1	3394929	3395113	chr1.capped.1138	119	-	AT1G10350	0	proximal	UTR5	4.71	5.29	3.45	6.17	8.28	4.12	14.53	11.47	9.3
chr1	3396772	3396898	chr1.capped.1139	78	-	AT1G10360	0	proximal	UTR5	11.54	22.62	22.35	14.84	18.28	19.75	41.04	46.5	32.91
chr1	3398292	3398360	chr1.capped.1140	59	-	AT1G10370	0	single-exon	UTR5	64.5	49.95	57.05	65.39	49.44	68.59	75.21	67.74	76.21
chr1	3400528	3400704	chr1.capped.1141	77	+	AT1G10380	0	proximal	UTR5	1.14	1.9	3.36	3.1	0.69	3.6	2.53	4.52	3.13
chr1	3403124	3403250	chr1.capped.1142	11	+	AT1G10385	0	proximal	UTR5	0.7	0.26	0.34	0.78	0.22	0.44	0.3	1.68	0.63
chr1	3412773	3412872	chr1.capped.1143	55	-	AT1G10390	0	single-exon	UTR5	5.18	9.21	5.2	3.2	1.1	4.55	10.42	9.44	10.69
chr1	3416862	3416892	chr1.noncapped.1144	7	-	AT1G10410	0	distal	CDS	1.16	2.23	1.01	0.57	0.39	0.36	0.28	0.35	0.32
chr1	3419236	3419442	chr1.capped.1145	169	-	AT1G10410	0	proximal	UTR5	3.88	6.14	3.28	3.46	1.85	4.68	11.85	10.1	9.86
chr1	3419488	3419727	chr1.capped.1146	137	-	AT1G10410	0	proximal	UTR5	10.96	8.53	3.34	12.33	14.63	10.11	16.89	15.81	18.67
chr1	3427503	3427563	chr1.capped.1147	38	-	AT1G10417	-11	upstream	UTR5	0.21	0.62	0.17	0.13	0	0.21	0.51	1.23	0.16
chr1	3430535	3430653	chr1.capped.1148	66	-	AT1G10430	0	proximal	UTR5	9.9	9.68	8.87	11.88	3.99	11.25	20.51	18.29	19.42
chr1	3431724	3431818	chr1.capped.1149	65	+	AT1G10450	0	proximal	UTR5	2.39	1.17	1.4	0.93	0.37	0.56	1.31	1.19	0.72
chr1	3435660	3435705	chr1.noncapped.1150	19	+	AT1G10450	0	distal	CDS	0	0.06	0	0.09	0.57	0.75	0.21	0	0.08
chr1	3443800	3444065	chr1.capped.1151	46	-	AT1G10470	0	proximal	UTR5	7.55	10.18	12.6	5.62	14.3	8.3	25.67	23.56	25.14
chr1	3453177	3453276	chr1.capped.1152	55	+	AT1G10490	0	proximal	UTR5	1.97	2.66	1.92	1.01	0.85	0.45	0.92	1.11	1.59
chr1	3461346	3461520	chr1.capped.1154	138	-	AT1G10500	0	proximal	UTR5	47.33	44.26	45.86	53.89	35.73	51.64	81.39	97.14	89.03
chr1	3461535	3461739	chr1.capped.1153	92	+	AT1G10510	-7	upstream	UTR5	6.84	5.14	4.49	5.59	2.52	4.81	5.33	4.66	4.07
chr1	3465891	3465984	chr1.capped.1155	49	+	AT1G10520	0	proximal	UTR5	0.31	0.47	0.75	0.22	0.31	1.45	0.75	0.61	1.48
chr1	3469622	3469726	chr1.noncapped.1156	1	+	ENSRNA049495688-T1	0	proximal	NC	2.97	7.09	7.57	0.05	1.08	2.15	24.31	15.08	3.72
chr1	3469834	3470008	chr1.capped.1157	138	+	AT1G10522	0	distal	UTR5	14.89	17.28	18.56	26.55	11.8	16.18	12.49	9.41	15.23
chr1	3472520	3472750	chr1.capped.1158	172	-	AT1G10530	-19	upstream	UTR5	0	0.43	0.21	0.45	0.81	0	0.46	1.67	1.74
chr1	3477762	3478082	chr1.capped.1159	102	-	AT1G10540	0	proximal	UTR5	1.2	3.03	2.46	3.32	1.02	1.69	7.1	8.35	9.15
chr1	3484548	3484610	chr1.capped.1160	3	+	AT1G10560	0	single-exon	UTR5	0.94	0.55	0.3	1.78	0.69	2.86	0.27	0.92	2.35
chr1	3487544	3487683	chr1.capped.1161	38	+	AT1G10570	0	proximal	UTR5	5.44	4.94	4.81	8.48	1.96	5.91	5.1	6.25	10
chr1	3493670	3493778	chr1.capped.1162	69	-	AT1G10580	0	proximal	UTR5	10.96	14.36	8.88	8.78	9.37	7.84	12.91	20.09	24.16
chr1	3495119	3495135	chr1.noncapped.1163	15	-	AT1G10585	0	proximal	UTR5	0	0	0	0	0	0	0.37	1.38	0.78
chr1	3503403	3503458	chr1.capped.1164	28	-	AT1G10590	0	proximal	UTR5	78.51	97.26	98.37	91.37	97.66	93.74	143.73	149.55	185.85
chr1	3503614	3503770	chr1.capped.1165	112	+	AT1G10600	0	proximal	UTR5	8.54	9.23	10.8	8.65	3.36	11.44	13.22	13.84	16.08
chr1	3506107	3506422	chr1.capped.1166	257	+	AT1G10610	0	proximal	UTR5	1.11	0.7	1.07	2.46	0.18	0.65	2.15	1.14	1.88
chr1	3512188	3512454	chr1.capped.1167	265	-	AT1G10620	-133	upstream	UTR5	1.22	2.12	1.2	1.05	2.66	4.96	0.51	3.46	0.78
chr1	3514691	3514780	chr1.capped.1168	19	-	AT1G10630	0	proximal	UTR5	94.89	92.52	77.57	109.22	71.65	98.74	198.11	148.3	180.58
chr1	3517876	3517911	chr1.capped.1169	11	-	AT1G10640	0	proximal	UTR5	46.36	32.88	25.1	59.44	66.27	48.77	119.05	89.14	130.27
chr1	3526108	3526168	chr1.capped.1170	30	-	AT1G10650	0	proximal	UTR5	2.16	2.2	2.91	2.02	3.32	4.29	9.29	8.13	4.69
chr1	3526195	3526497	chr1.capped.1171	154	-	AT1G10650	0	proximal	UTR5	5.73	8.49	7.69	6.69	6.12	11.37	14.61	17.57	8.93
chr1	3530408	3530587	chr1.capped.1172	95	+	AT1G10657	0	proximal	UTR5	39.32	48.77	54.59	38.16	37.48	39.28	27.21	28.56	27.2
chr1	3532371	3532595	chr1.capped.1173	103	+	AT1G10660	0	proximal	UTR5	7.34	14.46	12.88	6.98	4.15	12.93	19.4	26.55	20.93
chr1	3535486	3535619	chr1.capped.1174	27	+	AT1G10670	0	proximal	UTR5	122.43	82.21	85.84	116.75	50.42	141.75	181	155.84	169
chr1	3545441	3545541	chr1.capped.1175	29	-	AT1G10682	0	single-exon	NC	29.16	47.79	58.73	39.89	80.07	49.37	114.77	112.8	126.09
chr1	3550570	3550799	chr1.capped.1176	209	-	AT1G10690	0	single-exon	UTR5	3.5	3.78	4.77	2.89	6.15	4.15	6.13	6.63	11.73
chr1	3554102	3554133	chr1.capped.1177	6	+	AT1G10700	0	proximal	UTR5	2.67	3.77	2.89	3.01	2.69	4.24	12.58	10.27	18.16
chr1	3554225	3554282	chr1.capped.1178	23	+	AT1G10700	0	proximal	CDS	0.57	0.76	2.75	0.62	1.73	1.96	1.43	4.35	3.59
chr1	3558349	3558443	chr1.capped.1179	8	+	AT1G10710	0	proximal	UTR5	0.68	0.46	0.26	1.15	0.56	0.16	0.78	0.52	1.48
chr1	3562843	3563034	chr1.capped.1180	113	+	AT1G10720	0	proximal	UTR5	7.21	6.96	9.39	7.86	5.14	15.45	10.39	14.54	16
chr1	3565249	3565337	chr1.capped.1181	1	+	AT1G10730	-6	upstream	UTR5	2.03	2.12	1.82	3.08	0.21	3.46	4.85	6.96	7.43
chr1	3570634	3570908	chr1.capped.1182	64	-	AT1G10740	0	proximal	UTR5	9.44	21.47	15.92	15.4	11.7	16.23	42.35	72.02	34.87
chr1	3574275	3574348	chr1.capped.1183	44	+	AT1G10747	0	proximal	CDS	0.23	0.86	2.04	0.28	1.63	0	2.43	2.81	1.49
chr1	3578383	3578620	chr1.capped.1184	78	-	AT1G10750	0	proximal	UTR5	1.19	0.28	0.96	0.07	0.74	0.39	1.53	1.65	2.36
chr1	3590456	3590573	chr1.capped.1185	48	-	AT1G10760	0	proximal	UTR5	6.65	8.18	3.84	7.51	1.38	1.33	2.14	4.02	3
chr1	3592404	3592420	chr1.capped.1186	9	-	AT1G10770	0	single-exon	UTR5	132.19	356.98	296.26	179.85	243.43	467.62	52.86	399.19	133.47
chr1	3595039	3595199	chr1.capped.1187	47	-	AT1G10780	0	proximal	UTR5	2.04	4.07	2.88	2.4	2.1	2.36	4.21	2.88	3.43
chr1	3598839	3598911	chr1.capped.1188	69	-	AT1G10800	-24	upstream	UTR5	0.32	0.22	0.3	0.21	0	0.4	0.06	0.59	0.55
chr1	3604972	3605079	chr1.capped.1189	81	-	AT1G10820	0	proximal	UTR5	2.8	4.9	5.16	4.61	3.8	2.86	3.41	5.78	5.32
chr1	3607342	3607570	chr1.capped.1190	116	-	AT1G10830	0	proximal	UTR5	8.15	7.51	5.96	8.27	1.82	6.68	14.42	10.66	22.83
chr1	3610385	3610547	chr1.capped.1191	66	-	AT1G10840	0	proximal	UTR5	46.48	51.21	49.2	59.04	37.66	46.02	90.44	82.85	76.26
chr1	3611508	3611897	chr1.capped.1192	352	+	AT1G10850	0	proximal	UTR5	8.5	8.96	8.9	9.25	6.83	15.09	15.07	13.08	19.51
chr1	3611925	3611958	chr1.capped.1193	8	+	AT1G10850	0	proximal	UTR5	1.38	1.15	0.62	1.9	0.56	1.54	1.28	1.08	0.63
chr1	3616115	3616197	chr1.capped.1194	22	-	AT1G10865	0	single-exon	UTR5	15.62	17.57	20.25	17.69	24.25	23.77	32.82	35.94	30.55
chr1	3623641	3623806	chr1.capped.1195	106	-	AT1G10870	0	proximal	UTR5	3.25	4.96	4.66	6.45	2.94	2.45	6.1	7	5.18
chr1	3627638	3627764	chr1.capped.1196	69	+	AT1G10890	0	proximal	UTR5	11.21	11.16	13.31	9.93	6.61	14.67	14.99	18.62	19.18
chr1	3637059	3637238	chr1.capped.1197	150	-	AT1G10900	0	proximal	UTR5	1.25	1.35	1.09	1.79	1.29	0.4	2.47	2.14	1.82
chr1	3639830	3639940	chr1.capped.1198	63	+	AT1G10910	0	proximal	UTR5	4.3	6.6	3.1	6.01	1.33	6.41	9.99	7.54	10.15
chr1	3646528	3646543	chr1.noncapped.1199	8	-	AT1G10920	0	proximal	CDS	0	0	0.11	0	0	0	0	0.48	0.56
chr1	3647409	3647787	chr1.capped.1200	268	-	AT1G10920	0	proximal	UTR5	0.51	1.67	2.38	0.97	1.09	1.24	4.48	3.26	4.01
chr1	3655523	3655684	chr1.capped.1201	67	-	AT1G10930	0	proximal	UTR5	2.89	2.5	2.1	2.24	0.49	1.21	1.48	1.68	1.58
chr1	3658365	3658665	chr1.capped.1202	174	-	AT1G10940	0	proximal	UTR5	30.78	19.96	15.81	35.92	38.78	34.62	39.38	47.23	37.06
chr1	3659194	3659273	chr1.capped.1203	47	+	AT1G10950	0	proximal	UTR5	43.33	33.59	29.03	43.11	16.58	33.78	42.31	58.93	86.43
chr1	3664384	3664428	chr1.capped.1204	4	+	AT1G10960	0	proximal	UTR5	109.88	112.3	139.85	173.99	108.49	169.38	391.46	333.71	416.53
chr1	3665183	3665216	chr1.noncapped.1205	24	-	AT1G10970	0	distal	CDS	0.36	0.12	0.08	1.02	0	0.9	0.06	0.39	0
chr1	3666937	3667231	chr1.capped.1206	25	-	AT1G10970	0	proximal	UTR5	1.74	4.49	1.72	3.41	1.06	2.23	9.89	7.62	10.81
chr1	3669814	3669962	chr1.capped.1207	58	-	AT1G10980	0	proximal	UTR5	2.97	2.96	1.59	2.11	2.12	1.74	6.92	4.86	7.33
chr1	3671093	3671221	chr1.capped.1208	53	-	AT1G10990	0	single-exon	UTR5	0.27	0.6	0.78	0.18	0.33	0.21	0.72	0.25	0.63
chr1	3675928	3676153	chr1.capped.1209	12	-	AT1G11000	0	proximal	UTR5	8.63	7.47	6.33	9.75	3.13	5.63	11.94	13.28	16.47
chr1	3676602	3676832	chr1.capped.1210	153	+	AT1G11020	0	proximal	UTR5	7.42	4.85	6.27	7.45	6.89	7.47	9.76	9.78	10.8
chr1	3678308	3678324	chr1.noncapped.1211	12	+	AT1G11020	0	distal	CDS	3.32	2.43	2.52	12.74	3.23	7.26	0.39	2.51	0.24
chr1	3680896	3681108	chr1.capped.1212	90	-	AT1G11040	0	proximal	UTR5	0.59	1.16	1.07	0.76	1.25	2.14	0.54	2.17	0.56
chr1	3681693	3681953	chr1.capped.1213	127	+	AT1G11050	0	single-exon	UTR5	0.83	1.72	2.66	1.51	1.05	9.88	2.98	3.8	3.06
chr1	3684636	3684730	chr1.capped.1214	38	+	AT1G11060	0	proximal	CDS	3.85	1.93	2.41	2.32	3.21	2.78	5.32	5.04	6.55
chr1	3697793	3697840	chr1.capped.1215	14	-	AT1G11080	0	proximal	UTR5	0.57	0.76	0.56	0.41	0.4	0.92	0.33	0.58	0.47
chr1	3702513	3702705	chr1.capped.1216	57	+	AT1G11090	-37	upstream	UTR5	11.64	6.68	5.41	15.04	21.26	13.99	12.72	13.62	14.83
chr1	3709373	3709377	chr1.noncapped.1217	2	+	AT1G11100	0	antisense	UTR5	1.01	0.47	0	1.57	1.66	2.99	0.8	0.53	1.09
chr1	3713474	3713789	chr1.capped.1218	134	-	AT1G11112	0	single-exon	UTR5	2.89	2.93	2.78	2.99	2.94	3.82	6.29	6.25	3.46
chr1	3715043	3715224	chr1.capped.1219	66	+	AT1G11120	0	proximal	UTR5	6.33	6.4	10.96	8.29	5.03	14.13	10.06	6.36	8.52
chr1	3718733	3718847	chr1.capped.1220	44	+	AT1G11125	0	single-exon	UTR5	0.59	1.07	1.96	3.17	1.95	2.46	1.6	1.2	1.8
chr1	3722777	3722971	chr1.capped.1221	130	+	AT1G11130	0	proximal	UTR5	3.94	3.4	2.4	3.74	1.84	3.3	4.53	4.29	4.86
chr1	3723006	3723008	chr1.capped.1222	1	+	AT1G11130	0	proximal	UTR5	0	0.05	0	0.09	0	0	0.06	0.09	0.08
chr1	3728755	3729099	chr1.capped.1223	116	+	.	.	intergenic	.	1.87	1.84	1.22	3.4	2.09	1.75	3.3	3.84	2.83
chr1	3740698	3740830	chr1.capped.1224	66	+	AT1G11170	0	proximal	UTR5	0.54	0.87	0.37	0.89	0.87	1.09	1.26	0.9	1.08
chr1	3744835	3744965	chr1.capped.1225	53	+	AT1G11175	0	single-exon	NC	4.28	3.96	6.35	4.62	5.97	12.81	6.37	9.83	8.34
chr1	3745708	3745849	chr1.capped.1226	54	+	AT1G11180	-11	upstream	UTR5	2.34	1.86	2.56	2.01	2.86	2.42	3.55	7.27	5.62
chr1	3749504	3749513	chr1.capped.1227	3	+	AT1G11185	-2	upstream	NC	0	0.15	0.41	0.09	0	0.16	1.06	0.98	1.02
chr1	3750143	3750145	chr1.noncapped.1228	1	+	AT1G11190	0	antisense	UTR3	0.15	0.14	0.4	0	0	0	0.33	1.78	1.71
chr1	3750370	3750394	chr1.noncapped.1229	13	-	AT1G11190	0	distal	CDS	0.78	1.07	1.77	0.73	1.56	0.32	0.32	0.89	0.63
chr1	3751313	3751349	chr1.capped.1230	7	+	AT1G11190	33	intronic antisense	CDS	1.31	0.94	1.87	0.26	3.07	3.48	0.27	1.86	0.24
chr1	3752686	3752830	chr1.capped.1231	93	-	AT1G11190	0	proximal	UTR5	6.58	5.89	6.22	5.82	5.1	7.95	9.04	12.75	11.7
chr1	3753236	3753444	chr1.capped.1232	133	+	AT1G11200	0	proximal	UTR5	10.12	6.91	8.58	8.8	3.96	9.04	17.87	16.13	24.5
chr1	3761191	3761280	chr1.capped.1233	8	-	AT1G11220	0	proximal	CDS	2.07	2.2	1.6	3.13	0.91	1.29	5.68	5.29	5.54
chr1	3761392	3761406	chr1.capped.1234	10	-	AT1G11220	0	proximal	UTR5	0.16	0.68	0.51	0.62	1.56	0.11	1.39	0.59	1.09
chr1	3768236	3768294	chr1.capped.1235	12	-	AT1G11240	0	proximal	UTR5	28.47	32.69	31.08	33.36	34.28	32.54	45.21	34.77	29.17
chr1	3768498	3768592	chr1.capped.1236	28	+	AT1G11250	0	proximal	UTR5	9.35	9.63	10.76	9.87	22.59	57.76	4.35	20.52	3.21
chr1	3774996	3775024	chr1.noncapped.1237	24	-	.	.	intergenic	.	13.53	2.37	1.65	10.87	13.83	6.79	6.09	4.46	1.48
chr1	3777325	3777348	chr1.capped.1238	4	+	AT1G11260	0	proximal	UTR5	3.37	7.36	6.9	6.55	4.67	8.1	18.98	34.66	14.5
chr1	3786916	3787168	chr1.capped.1239	8	-	AT1G11270	0	proximal	UTR5	5.49	5.12	6.47	7.22	7.03	3.51	7.04	10.76	5.48
chr1	3790599	3790928	chr1.capped.1240	218	-	AT1G11280	0	proximal	UTR5	4.35	3.09	3.34	4.17	1.73	2.4	4.5	5.19	6.09
chr1	3797675	3797831	chr1.capped.1241	43	+	AT1G11303	0	proximal	UTR5	1.83	1.36	1.16	1.34	0.49	2.39	1.34	2.48	1.99
chr1	3803974	3804263	chr1.capped.1242	126	-	AT1G11310	0	proximal	UTR5	5.76	7.64	6.62	6.93	4.29	6.05	12.94	11.74	14.25
chr1	3807074	3807211	chr1.capped.1243	72	+	AT1G11320	0	proximal	UTR5	3.54	1.68	1.55	1.34	0.21	2.22	2.25	2.61	1.34
chr1	3810165	3810405	chr1.capped.1244	174	+	AT1G11330	0	proximal	UTR5	2.55	2.7	1.31	4.31	1.02	3.21	6.28	5.72	7.28
chr1	3820690	3820822	chr1.capped.1245	67	-	AT1G11350	0	proximal	UTR5	0.6	0.68	0.91	0.26	0.86	0.6	1.55	2.4	2.29
chr1	3822885	3822981	chr1.capped.1246	13	-	AT1G11360	0	proximal	CDS	16.71	15.17	16.24	14.24	11.03	12.37	24.25	37.46	39.07
chr1	3832587	3832733	chr1.capped.1247	35	+	AT1G11380	0	proximal	UTR5	2.07	3.91	3.25	5.41	2.93	5.25	4.91	4.88	6.26
chr1	3837104	3837107	chr1.noncapped.1248	1	+	AT1G11390	192	intronic antisense	CDS	17.97	4.89	0.28	34.61	8	8.55	2.29	0.28	2.43
chr1	3837434	3837668	chr1.capped.1250	110	-	AT1G11390	0	proximal	UTR5	3.35	3.33	2.57	2.72	1.85	4.73	5.76	5.78	4.72
chr1	3837618	3837733	chr1.capped.1249	73	+	AT1G11400	-2	upstream	UTR5	0.34	0.27	0.41	0.19	0.76	0.78	0.17	0.82	0.63
chr1	3837821	3837954	chr1.capped.1251	54	+	AT1G11400	0	proximal	UTR5	14.22	14.42	15.52	9.78	7.97	22.62	22.25	22.24	23.69
chr1	3841111	3841301	chr1.capped.1252	165	+	AT1G11410	0	proximal	CDS	7.04	4.22	3.46	6.7	4.55	4.5	7.52	10.44	18.49
chr1	3846931	3847086	chr1.capped.1253	77	-	AT1G11420	-53	upstream	UTR5	0.57	1.15	0.76	1.04	0.72	0.1	0.76	0.87	0.96
chr1	3847201	3847273	chr1.capped.1254	55	+	AT1G11430	0	proximal	UTR5	70.27	56.95	48.45	84.73	30.94	52.19	105.57	72.08	114.49
chr1	3849271	3849393	chr1.capped.1255	41	+	AT1G11440	0	proximal	UTR5	4.19	4.97	3.41	7.61	3.43	2.91	10.39	7.54	10.15
chr1	3853206	3853294	chr1.capped.1256	36	+	AT1G11450	0	proximal	UTR5	1.24	1.19	1.22	0.37	1.24	0.8	1.67	0.75	3.27
chr1	3862397	3862476	chr1.capped.1257	40	+	AT1G11475	0	proximal	UTR5	68.59	66.12	78.62	126.17	73.37	91.92	182.51	93.69	164.65
chr1	3866908	3866980	chr1.capped.1258	13	-	AT1G11480	0	proximal	UTR5	13.82	17.29	17.37	24.4	27.49	24.53	29.71	29.45	28.05
chr1	3870658	3870835	chr1.capped.1259	126	+	AT1G11500	0	proximal	UTR5	0.64	0.45	0.43	0.76	1.8	1.21	0.92	0.98	0.79
chr1	3872868	3872953	chr1.capped.1260	31	-	AT1G11510	0	single-exon	UTR5	0.07	0.69	1.3	0.15	1.52	0.59	0.21	1.09	1.02
chr1	3874375	3874564	chr1.capped.1261	112	+	AT1G11530	0	single-exon	UTR5	9.22	10.52	9.98	16.11	6.81	17.89	23.6	26.61	23.1
chr1	3880300	3880363	chr1.capped.1262	59	-	AT1G11545	0	proximal	UTR5	9.49	7.91	9.04	9.79	5.41	11.26	7.41	13.87	11.1
chr1	3883226	3883256	chr1.capped.1263	7	+	AT1G11570	0	proximal	CDS	3	5.56	4.25	9.04	1.97	7.36	8.28	10.74	10.13
chr1	3884322	3884505	chr1.capped.1264	84	+	AT1G11572	0	single-exon	UTR5	5.04	4.83	6.69	7.65	5.84	14.33	2.27	10.56	4.4
chr1	3888684	3888814	chr1.capped.1265	5	+	AT1G11580	0	proximal	CDS	2.97	3.49	5.15	6.94	4.18	6.12	11.51	11.51	21.3
chr1	3896886	3896994	chr1.capped.1266	53	-	AT1G11592	-6	upstream	NC	7.79	8.15	8.14	7.25	8.65	8.11	13.54	18.01	23.37
chr1	3902006	3902027	chr1.capped.1267	10	+	AT1G11600	0	single-exon	UTR5	14.97	14.7	7.42	13.77	3.13	7.51	12.92	11.29	12.31
chr1	3907636	3907719	chr1.capped.1268	21	-	AT1G11610	0	distal	CDS	3.75	4.85	10.21	4.41	8.55	13.15	3.57	12.93	7.89
chr1	3910758	3910872	chr1.capped.1269	77	+	AT1G11620	0	single-exon	UTR5	0.07	0.16	0.8	0	0.72	0.09	0.05	1.08	0.7
chr1	3914317	3914479	chr1.capped.1270	96	-	AT1G11630	0	single-exon	UTR5	3.2	4.1	4.73	2.06	2.76	2.27	5.85	5.33	3.22
chr1	3914755	3914857	chr1.capped.1271	61	+	AT1G11650	0	proximal	UTR5	34.66	43.32	38.9	38.58	17.82	35.35	82.28	91.31	118.52
chr1	3920020	3920083	chr1.noncapped.1272	35	-	.	.	intergenic	.	0.29	0.05	0	0.62	1.02	0.6	0.08	0.19	0
chr1	3920477	3920585	chr1.capped.1273	69	+	AT1G11660	0	proximal	UTR5	4.52	5.84	4.22	4.05	0.64	6.31	7.54	8.05	5.39
chr1	3931497	3931588	chr1.capped.1274	90	-	AT1G11670	0	proximal	UTR5	3.09	5.17	3.87	3.88	4.91	3.5	9.34	10.97	11.15
chr1	3938479	3938607	chr1.capped.1275	52	+	AT1G11680	0	proximal	UTR5	35.27	29.52	24.51	47.04	21.02	49.17	77.12	65.27	99.91
chr1	3945733	3945737	chr1.capped.1276	3	+	AT1G11700	0	single-exon	UTR5	16.28	18.16	17.07	24.2	11.21	19.88	31.94	25.83	41.29
chr1	3946558	3946571	chr1.capped.1277	11	-	AT1G11700	0	antisense	UTR3	0.55	1.01	0.54	1.56	0.79	0.31	3.2	1.69	2.88
chr1	3946983	3947023	chr1.capped.1278	31	-	.	.	intergenic	.	0.36	0.21	0.08	0.14	0.8	0.66	0.14	0.06	0
chr1	3948687	3948735	chr1.capped.1279	32	+	AT1G11710	0	single-exon	UTR5	0.63	0.68	0.5	0.52	1.1	0.1	1.41	1.94	0.86
chr1	3951348	3951509	chr1.capped.1280	58	+	AT1G11720	0	single-exon	UTR5	3.8	4.84	2.68	5.06	2.79	4.79	4.7	3.63	4.08
chr1	3957220	3957492	chr1.capped.1281	216	+	AT1G11730	0	proximal	UTR5	1.39	1.62	1.72	1.08	0.7	2.84	2.38	2.23	4.32
chr1	3961330	3961385	chr1.noncapped.1282	35	-	AT1G11735	0	single-exon	NC	0.41	0.26	0.37	0	0	0	0.97	0.58	0.93
chr1	3961688	3961725	chr1.noncapped.1283	16	-	AT1G11735	-241	upstream	NC	0.23	0.18	0.34	0.23	0.69	0.36	0.63	1.42	0.16
chr1	3963646	3963809	chr1.capped.1284	46	-	AT1G11740	0	distal	CDS	0.78	2.7	5.09	1.39	4.61	3.89	8.23	7.13	5.79
chr1	3967457	3967598	chr1.capped.1285	90	+	AT1G11750	0	proximal	UTR5	46.51	29.27	26.83	50.14	21.95	29.84	48.06	40.39	57.84
chr1	3971509	3971561	chr1.capped.1286	23	-	AT1G11755	-41	intron	UTR5	0.17	0.14	0.58	0.19	0.62	0.3	0.76	1.08	0.62
chr1	3971716	3971877	chr1.capped.1287	91	-	AT1G11755	0	proximal	UTR5	7.7	8.92	13.13	8.92	6.77	9.67	26.77	24.68	24.36
chr1	3973259	3973293	chr1.capped.1288	28	-	AT1G11760	0	proximal	UTR5	7.56	8.69	11.61	6.75	7.86	7.18	20.19	20.14	23.3
chr1	3973867	3973878	chr1.capped.1289	6	+	AT1G11765	0	single-exon	UTR5	22.21	83.38	68.98	35.38	74.73	105.58	6.17	76.66	21.35
chr1	3975659	3975668	chr1.capped.1290	3	+	AT1G11770	0	single-exon	UTR5	7.64	18.62	7.89	9.57	26.96	38.12	0.68	34.62	3.44
chr1	3977133	3977201	chr1.noncapped.1291	14	+	AT1G11770	0	single-exon	CDS	1.19	5.64	4.84	0.27	2.67	1.76	0.23	0.69	0
chr1	3979173	3979282	chr1.capped.1292	23	-	AT1G11780	0	proximal	UTR5	5.1	5.2	4.05	5.35	4.81	7.75	10.3	11.29	10
chr1	3980886	3981114	chr1.capped.1294	151	-	AT1G11785	0	proximal	UTR5	0.19	0.85	2.21	0.4	0.78	0.53	0.2	0.86	0.4
chr1	3981229	3981449	chr1.capped.1293	48	+	AT1G11790	0	proximal	UTR5	6.96	7.04	6.32	6.3	2.39	8.99	10.59	9.07	12.52
chr1	3987150	3987306	chr1.capped.1295	82	-	AT1G11800	0	proximal	CDS	5.83	5.29	4.39	5.52	1.92	3.22	13.26	8.22	10.96
chr1	3993412	3993630	chr1.capped.1296	123	-	AT1G11820	0	proximal	UTR5	11.32	13.98	11.45	7.76	5.5	4.92	16.73	18.17	22.24
chr1	3995400	3995456	chr1.capped.1297	11	+	AT1G11840	0	proximal	UTR5	115.02	119.98	116.5	174.01	59.89	87.57	201.38	187.97	232.18
chr1	3995680	3995683	chr1.noncapped.1298	1	-	AT1G11840	210	intronic antisense	UTR5	1.17	1.55	0.21	3.26	4.6	4.48	0.68	0.13	0
chr1	3999196	3999204	chr1.capped.1299	2	+	AT1G11850	0	single-exon	UTR5	712.64	301.88	342.93	534.89	268.88	1109.45	914.45	800.47	990.97
chr1	4001185	4001436	chr1.capped.1300	224	+	AT1G11860	0	proximal	UTR5	123.71	106.92	80.44	139.81	60.44	172.86	254.72	214.95	304.77
chr1	4003816	4003882	chr1.capped.1301	23	+	AT1G11870	0	proximal	UTR5	6.64	4.03	2.9	8.44	4.02	6.16	8.01	6.73	7.81
chr1	4010309	4010340	chr1.capped.1302	14	-	AT1G11880	0	proximal	CDS	0.06	0.28	0.17	0	0	0	0.49	0	0.94
chr1	4010365	4010461	chr1.capped.1303	51	-	AT1G11880	0	proximal	UTR5	2.15	1.65	1.7	1.32	1.51	1.63	6.3	4.18	4.8
chr1	4010719	4010856	chr1.capped.1304	59	+	AT1G11890	0	single-exon	UTR5	15.86	14.43	19.5	22.18	20.53	27.92	36.44	39.28	40.51
chr1	4014607	4014712	chr1.capped.1305	88	-	AT1G11900	-8	upstream	UTR5	0.59	1.67	1.7	0.93	1.27	1.8	3.6	2.72	1.64
chr1	4014818	4014905	chr1.capped.1306	31	+	AT1G11905	0	proximal	UTR5	7.71	6.16	7.83	10.09	4.5	10.87	24.49	18.31	27.98
chr1	4020886	4020983	chr1.capped.1307	31	-	AT1G11910	0	proximal	UTR5	97.13	103.77	57.19	121.03	51.91	91.63	261.38	228.71	107.98
chr1	4021757	4021891	chr1.capped.1308	46	+	AT1G11915	0	proximal	UTR5	0.34	0.23	0.39	0.88	0.25	1.14	0.7	0.82	0.86
chr1	4025097	4025118	chr1.capped.1309	20	-	AT1G11920	-5	upstream	UTR5	0.19	0.13	0.14	0	0.52	0	0.83	0.58	0.63
chr1	4028626	4028804	chr1.capped.1310	144	+	AT1G11930	0	proximal	UTR5	20.51	23	16.79	24.32	11.56	22.64	37.2	38.59	51.82
chr1	4033994	4034142	chr1.capped.1311	98	-	AT1G11940	0	proximal	UTR5	3.64	4.62	3.22	3.24	2.18	2.74	10.07	7.23	8.82
chr1	4038697	4038883	chr1.capped.1312	125	-	AT1G11950	0	proximal	UTR5	0.81	0.94	0.77	0.56	0.24	0.28	1.17	1.77	1.64
chr1	4043206	4043300	chr1.capped.1313	55	-	AT1G11960	-43	intron	UTR5	0.02	0.07	0.24	0.12	0	0	0.64	0.34	0.51
chr1	4043837	4044122	chr1.capped.1314	99	-	AT1G11960	0	proximal	UTR5	1.48	1.13	1.68	2.37	3.77	1.55	3.23	2.23	2.35
chr1	4045553	4045598	chr1.capped.1315	37	+	AT1G11980	-28	upstream	UTR5	0	0.3	1.14	0	1.98	2.32	0.91	1.33	0.39
chr1	4049021	4049167	chr1.capped.1316	118	-	AT1G11990	0	proximal	UTR5	1.74	3.49	3.34	0.91	1.51	3.22	0.55	4.71	1.03
chr1	4053782	4053838	chr1.capped.1317	52	-	AT1G12000	0	proximal	UTR5	44.45	40.3	23.74	57.73	63.86	34.03	78.52	77.93	105.2
chr1	4056205	4056289	chr1.capped.1318	1	+	AT1G12010	0	proximal	UTR5	0.07	0.21	0.26	0	0.58	0.33	4.55	1.68	1.1
chr1	4058145	4058304	chr1.capped.1319	15	+	AT1G12013	-126	upstream	NC	5.85	3.85	4.31	6.28	5.9	3.86	5.15	6.91	3.11
chr1	4058483	4058526	chr1.noncapped.1320	2	+	AT1G12015	-1	upstream	NC	9.06	3.64	1.26	0	2.88	0.16	3.72	2.79	1.48
chr1	4062003	4062103	chr1.capped.1321	38	-	AT1G12020	0	single-exon	UTR3	0.58	0	0.09	1.03	0	0.29	0.18	0.9	1.56
chr1	4062589	4062627	chr1.capped.1322	13	+	AT1G12020	0	antisense	UTR3	0	0.67	0.2	0.12	0.26	0	0.65	1.1	0.55
chr1	4063303	4063401	chr1.capped.1323	33	-	AT1G12020	0	single-exon	UTR5	1.38	2.22	4.32	2.21	0	0.91	2.66	4.18	3.59
chr1	4072742	4072858	chr1.capped.1324	52	+	AT1G12050	0	proximal	UTR5	14.77	16.18	11.59	26.18	8.79	20.97	30.41	34.29	33.31
chr1	4076238	4076379	chr1.capped.1325	36	+	AT1G12060	0	single-exon	UTR5	4.32	2.04	2.31	6.85	5.07	4.43	7.08	5.74	10.06
chr1	4076910	4076963	chr1.capped.1326	26	-	AT1G12060	0	antisense	CDS	0.72	0.84	1.2	0.8	0.72	0.56	0.51	1.98	1.8
chr1	4080231	4080431	chr1.capped.1327	141	-	AT1G12070	-137	upstream	UTR5	4.54	6.23	6.46	4.89	7.72	12.39	2.22	9.33	3.14
chr1	4080542	4080628	chr1.capped.1328	11	+	.	.	intergenic	.	0	0.08	0.31	0.79	1.01	0.52	0	0.79	0
chr1	4084203	4084214	chr1.capped.1329	3	+	AT1G12080	0	proximal	UTR5	154.92	174.57	248.99	136.36	167.48	377.05	150.48	398.92	331.66
chr1	4090643	4090648	chr1.capped.1330	3	-	AT1G12090	0	single-exon	UTR5	691.07	600.44	425.29	871.64	293.75	464.66	519.47	627.36	615.78
chr1	4105230	4105316	chr1.capped.1331	7	+	AT1G12110	0	proximal	UTR5	5.17	2.45	2.09	9.27	12.22	17.14	24.82	27.04	13.26
chr1	4109148	4109263	chr1.noncapped.1332	112	+	AT1G12110	0	distal	CDS	1.24	1.33	2.25	0.43	0.48	0.32	0.28	0.81	0.87
chr1	4115014	4115044	chr1.noncapped.1333	22	-	AT1G12120	0	distal	CDS	4.07	3.9	2.32	9.21	7.86	7.49	1.5	2.45	1.03
chr1	4117345	4117438	chr1.capped.1334	24	-	AT1G12120	0	proximal	UTR5	3.73	5.4	2.66	4.54	4.42	4.74	3.92	4.55	3.37
chr1	4117470	4117619	chr1.capped.1335	103	-	AT1G12120	0	proximal	UTR5	9.07	9.34	6.63	10.45	5.02	8.21	11.97	13.81	14.37
chr1	4121367	4121375	chr1.capped.1336	4	+	AT1G12140	0	proximal	UTR5	6.41	5.44	3.16	6.36	4.35	4.1	13.99	13.02	10.29
chr1	4125363	4125664	chr1.capped.1337	234	-	AT1G12150	0	proximal	UTR5	5.93	4.02	4	8.38	23.65	12.57	3.93	20.12	9.5
chr1	4126006	4126074	chr1.capped.1338	50	+	AT1G12160	0	proximal	UTR5	0.36	0.42	0.59	0.81	0.22	0.43	0.37	0.66	0.94
chr1	4137531	4137599	chr1.capped.1339	3	+	AT1G12200	0	proximal	UTR5	1.26	1.62	1.29	1.67	0.68	1.88	2.67	2.67	1.49
chr1	4140210	4140400	chr1.capped.1340	63	+	AT1G12210	0	single-exon	UTR5	3.44	1.69	2.57	3.62	3.1	3.03	2.54	0.78	2.51
chr1	4148027	4148055	chr1.capped.1341	6	+	AT1G12230	0	proximal	UTR5	41.5	41.76	27.15	60.54	27.73	61.95	166.04	136.67	129.19
chr1	4153586	4153662	chr1.capped.1342	65	+	AT1G12240	0	proximal	UTR5	44.58	32.9	19.47	52.76	27.67	68.68	152.89	198.22	181.7
chr1	4157637	4157783	chr1.capped.1343	98	+	AT1G12244	0	proximal	CDS	4.05	5.91	5.72	6.01	3.14	5.64	6.28	5.34	7.25
chr1	4159223	4159345	chr1.capped.1344	43	+	AT1G12250	0	proximal	UTR5	13.46	10.34	10.14	10.69	6.84	11.12	18.63	19.74	21.92
chr1	4165655	4165776	chr1.capped.1345	29	-	AT1G12260	0	proximal	UTR5	1.22	0.92	0.44	0.34	0.87	0.66	0.98	1.56	0.94
chr1	4171995	4172094	chr1.capped.1346	79	+	AT1G12270	0	proximal	UTR5	14.01	16.23	13.42	17.06	9.68	13.47	21.71	18.09	27.24
chr1	4177551	4177667	chr1.capped.1347	108	-	AT1G12280	0	single-exon	UTR5	1.34	0.86	1.11	1.3	0	1.09	1.13	0.88	0.95
chr1	4182595	4182707	chr1.capped.1348	104	-	AT1G12290	-107	upstream	UTR5	0.18	0.14	0.48	0.28	1.1	0.49	0	0.85	0.7
chr1	4186108	4186235	chr1.capped.1349	29	-	AT1G12300	0	single-exon	UTR5	1.19	0.8	0.06	0.71	0.71	0.07	2.17	0.67	1.18
chr1	4187971	4188059	chr1.capped.1350	55	-	AT1G12310	0	single-exon	UTR5	90.84	111.21	109.86	112.82	86.79	110.69	194.86	215.16	282.43
chr1	4189290	4189377	chr1.capped.1351	64	+	AT1G12320	0	single-exon	UTR5	4.5	4.7	4.93	10	9.01	5.59	8.79	12.55	17.64
chr1	4194394	4194511	chr1.capped.1352	60	+	AT1G12330	0	proximal	UTR5	0.88	0.79	0.2	1.11	1.35	2.29	1.82	0.82	1.41
chr1	4194597	4194660	chr1.capped.1353	53	+	AT1G12330	0	proximal	UTR5	18.94	17.79	18.27	25.07	22.78	29.89	50.79	43.98	50.42
chr1	4196954	4197105	chr1.capped.1354	64	+	AT1G12340	-377	upstream	UTR5	0.22	0.32	0.89	1.15	0.9	0.15	0.45	0.84	0.63
chr1	4198335	4198538	chr1.capped.1355	138	+	AT1G12350	0	proximal	UTR5	5.69	6.51	6.5	5.31	4.13	5.61	8.98	13.61	17.54
chr1	4200874	4201088	chr1.capped.1356	173	+	AT1G12360	0	proximal	UTR5	6.14	7.11	5.21	6.83	4.51	8.09	13.07	16	14.46
chr1	4208883	4208975	chr1.capped.1357	67	-	AT1G12370	0	proximal	UTR5	6.41	6.34	4.29	6.12	4.2	6.48	11.54	14.31	18.39
chr1	4214418	4214477	chr1.noncapped.1358	41	-	AT1G12380	0	single-exon	UTR3	0.24	0.94	0.84	0.06	0.48	0	0.82	0.72	0.24
chr1	4217052	4217131	chr1.capped.1359	61	-	AT1G12380	0	single-exon	UTR5	6.41	5.05	4.74	6.12	15.79	4.19	11.29	6.38	13.59
chr1	4220102	4220254	chr1.capped.1360	89	+	AT1G12390	0	proximal	UTR5	19.34	17.48	20.93	24.94	23.69	25.54	45.82	37.17	44.83
chr1	4221004	4221008	chr1.noncapped.1361	1	-	AT1G12390	0	antisense	CDS	1.75	1.82	2.31	0.97	4.65	2.14	1.42	1.03	0
chr1	4221819	4221987	chr1.capped.1362	96	+	AT1G12400	0	proximal	UTR5	13.53	11.76	19.67	25.24	13.56	22.84	23.78	22.28	22.15
chr1	4223014	4223086	chr1.capped.1363	37	+	AT1G12410	0	proximal	UTR5	29.84	39.87	34.54	56.39	26.91	40.26	62.73	61.07	83
chr1	4228488	4228597	chr1.capped.1364	74	-	AT1G12420	-92	upstream	CDS	0.35	0.89	0.48	0.71	1.96	1.64	0.36	1.6	0.87
chr1	4229121	4229139	chr1.capped.1365	6	-	AT1G12420	0	proximal	UTR5	9.9	8.29	7.96	14.36	19.12	7.68	14.05	15.41	9.44
chr1	4233963	4234031	chr1.noncapped.1366	38	-	AT1G12430	0	distal	UTR3	0.73	0.61	0.35	3.38	2.02	4.61	0.72	0.43	1.33
chr1	4238584	4238812	chr1.capped.1367	175	-	AT1G12430	0	proximal	UTR5	12.17	8.38	10.99	12.24	12.38	8.86	14.42	15.12	11.02
chr1	4242392	4242581	chr1.capped.1368	110	-	AT1G12440	0	single-exon	UTR5	13.21	11.3	10.09	11.6	9.89	10.03	27.83	24.14	20.91
chr1	4242956	4243033	chr1.capped.1369	23	-	AT1G12440	0	single-exon	UTR5	46.86	67.35	81.36	53.52	61.19	57.24	138.99	186.06	130.21
chr1	4243107	4243233	chr1.capped.1370	120	-	AT1G12440	0	single-exon	UTR5	0.71	0.71	0.5	0.38	0	0.66	1.02	2.1	0.71
chr1	4244256	4244389	chr1.capped.1371	32	+	AT1G12450	0	proximal	UTR5	5.99	5.94	6.83	7.25	5.35	7.37	11.01	15.55	13.37
chr1	4244421	4244488	chr1.capped.1372	58	+	AT1G12450	0	proximal	UTR5	2.43	7.59	4.02	1.59	3.45	8.54	1.35	6.89	4
chr1	4247175	4247440	chr1.capped.1373	184	+	AT1G12460	0	proximal	UTR5	2.47	2.88	2.07	4.26	0.48	3.94	7.31	5.51	4.79
chr1	4247511	4247602	chr1.capped.1374	32	+	AT1G12460	0	proximal	UTR5	0.32	0.13	0.17	0.64	0.21	0.17	1.34	0.77	0.79
chr1	4247701	4247752	chr1.capped.1375	40	+	AT1G12460	0	proximal	CDS	0.27	0.45	0.3	0.13	0.19	0.24	1.07	0.83	1.26
chr1	4250915	4251078	chr1.capped.1376	92	+	AT1G12470	0	proximal	UTR5	2.79	2.87	2.12	3.27	1.36	3.87	5.41	5.79	4.92
chr1	4259203	4259343	chr1.capped.1377	96	-	AT1G12480	0	single-exon	UTR5	1.61	0.89	0.37	0.59	0	1	0.96	1.2	1.09
chr1	4263395	4263418	chr1.noncapped.1378	4	-	AT1G12500	0	distal	UTR3	0.45	0.09	0.14	2.3	4.39	1.13	0.1	0.56	0.16
chr1	4264981	4265075	chr1.capped.1379	75	-	AT1G12500	0	proximal	UTR5	13.82	13.3	10.93	21.78	25.09	17.84	22.14	34.2	34.8
chr1	4267673	4267688	chr1.noncapped.1380	12	-	AT1G12520	0	distal	CDS	3.8	2.54	1.83	2.23	0	0.97	1.5	0.24	0.78
chr1	4268859	4268945	chr1.capped.1381	41	-	AT1G12520	0	proximal	CDS	10.87	13.09	13.85	19.71	11.54	14.51	60.03	55.82	81.52
chr1	4270715	4270844	chr1.capped.1382	125	-	AT1G12530	0	proximal	UTR5	10.55	12.41	12.96	18.15	11.91	18.94	17.82	21	25.36
chr1	4274535	4274670	chr1.capped.1383	99	+	AT1G12550	0	proximal	UTR5	3.71	3.94	3.17	6.88	2.72	12.29	10.1	10.59	9.69
chr1	4280768	4280864	chr1.capped.1384	93	-	AT1G12570	0	proximal	UTR5	18.8	15.86	11.48	17.17	5.64	8.8	25.06	39.19	36.86
chr1	4281043	4281268	chr1.capped.1385	155	-	AT1G12570	-68	upstream	UTR5	1.1	1.19	1.01	0.84	0.49	0.72	0.15	3.07	1.1
chr1	4282846	4283002	chr1.capped.1386	52	+	AT1G12580	0	proximal	UTR5	5.16	7.08	8.76	8.87	5.32	11.87	8.29	9.26	8.37
chr1	4288287	4288417	chr1.capped.1387	93	-	AT1G12600	-101	intron	CDS	0.58	0.15	0.23	0	0.38	0.59	0.42	1.26	1.03
chr1	4288591	4288654	chr1.capped.1388	31	+	AT1G12600	105	intronic antisense	CDS	0	0.38	0.15	0.06	0.82	0.91	0.64	1.06	0.54
chr1	4288959	4289103	chr1.capped.1389	134	-	AT1G12600	-25	upstream	UTR5	0.69	0.34	1.09	0.55	0.92	1.75	0.7	4.05	2.76
chr1	4291005	4291014	chr1.capped.1390	8	-	AT1G12610	0	single-exon	UTR5	0.26	1.05	1.41	0.14	2.77	21.61	0	0	8.03
chr1	4297009	4297118	chr1.capped.1391	59	-	AT1G12620	0	proximal	UTR5	2.01	1.57	1.78	1.55	1.23	0.26	4.36	3.12	3.76
chr1	4305704	4305807	chr1.capped.1393	18	-	AT1G12640	0	proximal	UTR5	15.28	12.6	11.14	14.82	5.39	14.02	28.2	45.27	38.63
chr1	4305923	4305990	chr1.capped.1392	9	+	AT1G12650	0	proximal	UTR5	15.43	13.88	16.04	22.04	9.21	24.1	24.16	19.83	19.74
chr1	4306016	4306072	chr1.capped.1394	6	+	AT1G12650	0	proximal	UTR5	0.45	0.72	1.38	1.47	0.79	0.99	0.23	0.31	1.49
chr1	4322912	4322947	chr1.capped.1395	32	-	AT1G12680	0	proximal	UTR5	4.36	5.65	7.94	4.42	5.6	5.78	6.27	10.05	7.72
chr1	4326223	4326421	chr1.capped.1396	72	-	AT1G12700	0	proximal	UTR5	0.63	0.35	0.4	0.5	0	0.3	0.97	0.97	1.18
chr1	4328454	4328603	chr1.capped.1397	12	-	AT1G12710	0	proximal	UTR5	4.89	4.7	3.59	7.05	1.09	4.38	8.16	10.13	8.59
chr1	4334477	4334658	chr1.capped.1398	133	+	AT1G12730	0	proximal	UTR5	1.29	1.62	1.32	1.11	0.28	1.96	1.16	1.92	1.42
chr1	4339010	4339048	chr1.capped.1399	25	+	AT1G04967	0	antisense	NC	16.4	28.03	31.47	34.95	47.79	58.16	11.96	67.23	22.54
chr1	4348278	4348442	chr1.capped.1401	48	-	AT1G12750	0	proximal	UTR5	3.53	5.43	4.88	5.61	3.57	3.99	7.01	4.53	4.31
chr1	4348491	4348655	chr1.capped.1400	5	+	AT1G12760	-1	upstream	UTR5	8.51	7.3	9.72	11.29	6.71	11.04	13.95	21.4	16.88
chr1	4351195	4351262	chr1.capped.1402	19	+	AT1G12770	0	proximal	UTR5	3.94	4.68	4.38	2.98	0.86	3.57	3.27	4.19	7.19
chr1	4353841	4353906	chr1.capped.1403	38	+	AT1G12775	0	single-exon	UTR5	0.66	1.11	0.63	2.08	0.92	1.47	1.22	0.97	2.28
chr1	4356117	4356174	chr1.noncapped.1404	28	-	AT1G12780	0	distal	CDS	10.06	11.82	10.64	3.43	12.06	5.13	0.64	1.31	1.42
chr1	4356466	4356496	chr1.noncapped.1405	29	-	AT1G12780	0	distal	CDS	2.46	1.91	3.15	0.38	1.98	1.25	0.83	1.47	0.24
chr1	4358173	4358456	chr1.capped.1406	50	-	AT1G12780	0	proximal	UTR5	12.81	21.42	25.36	18.8	13.67	30.59	40.56	72.91	37.43
chr1	4361239	4361331	chr1.capped.1407	33	-	AT1G12790	0	proximal	UTR5	1.48	1.78	1.39	0.87	2.33	2.2	3.19	5.55	2.5
chr1	4365284	4365392	chr1.capped.1408	37	-	AT1G12800	0	proximal	UTR5	10.14	12.92	7.86	8.87	8.92	5.62	5.26	8.38	7.49
chr1	4366607	4366666	chr1.capped.1409	1	+	AT1G12805	0	single-exon	UTR5	0.57	0.33	0.6	0.9	2.85	1.75	0.58	0.15	0.47
chr1	4367249	4367339	chr1.capped.1410	45	+	AT1G12810	0	proximal	UTR5	17.58	22.33	24.81	38.98	19.51	34.9	70.17	69.02	109.72
chr1	4371259	4371298	chr1.capped.1411	33	-	AT1G12820	0	proximal	UTR5	8.74	10.68	10.99	8.9	4.86	7.68	17.67	21.74	12.07
chr1	4375090	4375178	chr1.capped.1412	59	-	AT1G12830	0	single-exon	UTR5	22.4	40.18	37.6	32.65	39.89	32.16	59.63	55.75	51.17
chr1	4375513	4375577	chr1.capped.1413	1	+	AT1G12840	0	single-exon	UTR5	68.9	56.89	44.32	67.61	36.89	99.02	105.31	102.18	124.6
chr1	4379362	4379437	chr1.capped.1414	47	-	AT1G12845	0	single-exon	UTR5	72.04	91.76	53.41	85.46	35.82	56.66	60.45	40.9	58.83
chr1	4381549	4381675	chr1.capped.1415	54	-	AT1G12850	0	proximal	UTR5	17.81	18.9	12.33	22.37	21.1	15.12	24.15	26.59	27.56
chr1	4384332	4384551	chr1.capped.1416	138	+	AT1G12860	0	proximal	UTR5	4.15	6.39	3.9	7.34	4.14	7.23	7.07	8.71	10.1
chr1	4384575	4384652	chr1.capped.1417	47	+	AT1G12860	0	proximal	UTR5	0.56	0.47	0.17	2.2	0.88	0.3	0.75	0.34	0.24
chr1	4384668	4384763	chr1.capped.1418	18	+	AT1G12860	0	proximal	UTR5	1.58	2.06	1.25	1.24	1.55	2.15	2.11	1.63	1.86
chr1	4389730	4389895	chr1.capped.1419	4	+	AT1G12880	0	proximal	UTR5	11.09	11.48	12.86	13.11	8.76	17.74	12.91	14.16	11.22
chr1	4391641	4391730	chr1.capped.1420	46	+	AT1G04983	0	single-exon	NC	0.53	0.74	1.12	1.55	1.24	3.2	1.79	0.77	0.86
chr1	4394281	4394394	chr1.capped.1421	29	-	AT1G12900	0	proximal	CDS	211.62	235.63	205.09	262.63	146.11	207.23	377.17	367.46	355.61
chr1	4396171	4396250	chr1.capped.1422	47	-	AT1G12910	0	single-exon	UTR5	18.82	22.4	23.34	24.56	15.35	23.22	48.06	44.97	68.26
chr1	4398084	4398190	chr1.capped.1423	65	-	AT1G12920	0	proximal	UTR5	23.71	27.09	22.68	28.83	16.84	28.3	62.7	52.81	59.87
chr1	4405483	4405656	chr1.capped.1424	124	-	AT1G12930	0	proximal	UTR5	2.53	2.74	1.42	2.01	3.83	2.26	4.15	2.39	3.71
chr1	4423560	4423737	chr1.capped.1425	77	+	AT1G12970	0	proximal	UTR5	2.99	4.32	3.7	2.27	2.73	2.68	5.69	7.03	4.56
chr1	4433611	4433742	chr1.capped.1426	16	+	AT1G12990	0	proximal	UTR5	8.4	5.36	4.44	9.55	4.23	7.92	12.31	12.67	12.02
chr1	4439324	4439589	chr1.capped.1427	139	-	AT1G13000	0	proximal	UTR5	6.18	3.84	2.47	8.03	6.87	4.7	6.28	3.6	5.82
chr1	4440665	4440721	chr1.noncapped.1428	7	-	AT1G13020	0	distal	UTR3	2.79	1.41	1.6	1.34	3.72	0.94	0.53	0.23	0.72
chr1	4440750	4440814	chr1.noncapped.1429	33	-	AT1G13020	0	distal	UTR3	0.93	0.92	0.93	0.35	0	0.41	0.74	0.11	0.94
chr1	4441239	4441288	chr1.noncapped.1430	41	-	AT1G13020	0	distal	CDS	0.78	0.89	0.49	0.49	0	0.7	0.43	0.53	0.24
chr1	4442893	4442960	chr1.noncapped.1431	38	-	AT1G13020	0	proximal	CDS	0.17	0.54	0.35	0.4	0.69	0.22	1.15	1.55	0.32
chr1	4443650	4443739	chr1.capped.1432	42	-	AT1G13020	0	proximal	UTR5	6.8	7.82	4.73	7.43	5.09	5.97	12.19	13.84	15.71
chr1	4447294	4447412	chr1.capped.1433	111	-	AT1G13030	0	proximal	UTR5	5.44	6.9	7.77	4.62	3.33	5.48	6.3	5.71	4.69
chr1	4447540	4447598	chr1.capped.1434	42	+	AT1G13040	0	proximal	UTR5	0.41	0.84	0.46	0.61	0.22	0.69	0.31	0.65	0.32
chr1	4452228	4452347	chr1.capped.1435	78	+	AT1G13060	0	proximal	UTR5	31.03	21.9	21.67	29.13	23.8	23.41	42.42	33.64	93.7
chr1	4459052	4459244	chr1.capped.1436	113	+	AT1G13080	0	proximal	UTR5	1.98	3.19	3.56	2.69	4.87	3.63	12.79	19.04	31.43
chr1	4461737	4461947	chr1.capped.1437	68	+	AT1G13090	0	single-exon	UTR5	5.22	7.41	5.51	12.69	4.31	3.96	14.99	16.69	17.25
chr1	4467146	4467278	chr1.capped.1438	73	+	AT1G13110	0	proximal	UTR5	0.24	0.32	0.62	0	0.71	1.24	0.62	0.6	0.63
chr1	4472891	4472951	chr1.capped.1439	35	-	AT1G13120	0	proximal	UTR5	1.86	2.42	1.44	2.44	0.59	2.42	1.35	0.87	0.86
chr1	4473061	4473326	chr1.capped.1440	137	-	AT1G13120	0	proximal	UTR5	6.14	10.35	7.74	8.32	7.98	8.85	14.98	13.1	11.96
chr1	4474691	4474857	chr1.capped.1441	3	+	AT1G13130	0	proximal	UTR5	4.74	1.1	1.97	3.78	3.32	5.33	4.82	14.94	10.75
chr1	4477176	4477272	chr1.noncapped.1442	12	+	AT1G13130	0	distal	CDS	0.3	0	1.18	0.71	0.31	2.09	0	0.35	0.23
chr1	4478109	4478190	chr1.capped.1443	14	+	.	.	intergenic	.	0.31	0.56	0.38	0.24	0.41	0.41	0.2	0.57	0.87
chr1	4480311	4480340	chr1.capped.1445	26	-	AT1G13140	-11	upstream	UTR5	0.51	0.43	1.76	0.39	2.41	1.76	1.56	4.28	2.02
chr1	4480421	4480628	chr1.capped.1446	31	-	AT1G13140	-126	upstream	UTR5	2.6	3.95	7.92	2.59	10.78	4.65	21.67	24.58	15.44
chr1	4480637	4480860	chr1.capped.1444	183	+	.	.	intergenic	.	6.92	8.04	9.24	10.9	6.39	10.85	13.43	11.11	13.96
chr1	4483622	4483703	chr1.capped.1447	77	-	AT1G13150	0	single-exon	UTR5	3.1	4.28	9.32	2.45	6.4	4.67	22.14	25.73	16.14
chr1	4484585	4484590	chr1.capped.1448	1	+	AT1G13160	0	proximal	UTR5	7.2	5.02	5.07	2.57	4.53	3.53	10.23	6.3	7.94
chr1	4488725	4488821	chr1.noncapped.1449	3	-	AT1G13170	0	distal	UTR3	1.07	1.16	0.36	2.59	1.17	0.66	0.07	0.33	0.24
chr1	4492423	4492610	chr1.capped.1450	104	-	AT1G13170	0	proximal	UTR5	5.37	6.86	4.7	5.22	4.83	3.73	6.46	5.68	5.41
chr1	4494946	4495144	chr1.capped.1451	81	+	AT1G13180	0	proximal	UTR5	4.18	2.85	2.37	2.95	1.57	4.67	5.58	3.21	5.48
chr1	4498774	4498936	chr1.capped.1452	98	+	AT1G13190	0	proximal	UTR5	17.06	16.5	20.5	25.37	12.21	26.06	18.38	22.39	15.87
chr1	4503354	4503406	chr1.capped.1453	21	-	AT1G13195	0	proximal	UTR5	0.5	0.67	1.01	0.52	0.27	0.37	0.78	0.35	0.39
chr1	4503443	4503586	chr1.capped.1454	36	-	AT1G13195	0	proximal	UTR5	3.04	3.94	6.12	3.41	5.08	6.64	7.83	8.34	13.12
chr1	4513832	4514010	chr1.capped.1455	105	-	AT1G13210	0	proximal	UTR5	0.9	1.26	0.58	0.94	2.24	2.77	0.74	1	0.87
chr1	4515546	4515659	chr1.capped.1456	10	+	AT1G13220	0	proximal	UTR5	8.65	12.21	9.62	10.65	5.48	14.98	12.42	14.62	16.09
chr1	4520548	4520705	chr1.capped.1457	65	+	AT1G13230	0	proximal	UTR5	0.63	0.56	0.98	0.22	0.41	1.05	1.44	1.38	1.45
chr1	4522734	4522782	chr1.noncapped.1458	47	-	ENSRNA049492607-T1	0	single-exon	NC	0.41	0	0.22	0	2.72	0.62	0.27	0.12	0.01
chr1	4526043	4526073	chr1.capped.1459	21	-	AT1G13245	0	single-exon	UTR5	10.8	17.61	30.33	10.67	21.74	17.59	5.97	18.51	8.19
chr1	4529989	4530094	chr1.capped.1460	73	-	AT1G13250	0	single-exon	UTR5	13.28	11.25	10.74	12.68	12.06	6.12	6.41	7.7	9.12
chr1	4533374	4533376	chr1.capped.1461	1	+	.	.	intergenic	.	0.06	0	0	0.47	1.51	0.81	0	0	0
chr1	4542191	4542343	chr1.capped.1462	115	+	AT1G13260	0	single-exon	UTR5	1.31	0.77	1.78	2.33	2.32	5.56	0.81	2.79	11.1
chr1	4544946	4545019	chr1.capped.1463	6	+	AT1G13270	0	proximal	UTR5	10.28	8.89	2.98	10.01	2.44	8.34	22.48	12.98	37.33
chr1	4547442	4547614	chr1.capped.1464	102	+	AT1G13280	0	proximal	UTR5	63.48	54.43	47.78	64.27	26.86	49.67	81.79	97.94	109.32
chr1	4551582	4551707	chr1.noncapped.1465	11	-	AT1G13290	0	proximal	UTR5	1.39	1.42	0.21	1.32	1.46	0.59	2.22	0.49	0.48
chr1	4567719	4567768	chr1.capped.1466	23	-	AT1G13320	0	proximal	UTR5	15.7	13.64	10.32	10.97	7.92	8.25	26.66	25.07	17.59
chr1	4567914	4567983	chr1.capped.1467	20	+	AT1G13330	0	proximal	UTR5	3.43	4.32	2.41	3.72	1.48	5.48	6.45	5.26	6.32
chr1	4575705	4575762	chr1.noncapped.1468	22	-	AT1G13350	0	distal	CDS	0.04	0	0.15	0.84	3.24	0.75	0	0	0.32
chr1	4576149	4576189	chr1.noncapped.1469	1	-	AT1G13350	-156	intron	CDS	0	0	0	0.69	0.65	0	0	0.4	0
chr1	4576560	4576736	chr1.capped.1470	70	-	AT1G13350	0	proximal	UTR5	8.17	11.37	14.89	9.72	9.1	5.9	9.29	14.46	13.74
chr1	4576899	4577003	chr1.capped.1471	89	+	AT1G13360	0	antisense	CDS	1.41	2.65	0.87	3.98	2.58	4.13	1.61	3.1	2.96
chr1	4577788	4577835	chr1.capped.1472	39	-	AT1G13360	0	single-exon	UTR5	5.16	4.99	7.68	6.13	6.95	5.58	9.49	14.01	8.96
chr1	4577895	4577905	chr1.capped.1473	9	-	AT1G13360	0	single-exon	UTR5	26.36	24.89	24.89	30.53	15.35	21.31	89.79	89.76	59.75
chr1	4588568	4588617	chr1.capped.1474	44	-	AT1G13370	0	proximal	UTR5	0.41	0.8	0.94	0.06	0.58	0.35	0.62	1.19	1.4
chr1	4590377	4590444	chr1.capped.1475	33	-	AT1G13380	0	proximal	UTR5	32.87	26.85	35.37	34	32.64	28.74	65.27	57.07	43.59
chr1	4592687	4592762	chr1.noncapped.1476	63	-	AT1G13390	0	distal	UTR3	0.4	0.66	0.63	5.68	4.29	4.18	0.33	1.47	0.85
chr1	4593582	4593736	chr1.capped.1477	116	-	AT1G13390	0	proximal	UTR5	10.05	11.34	8.13	9.6	8	8.58	7.88	16.52	12.67
chr1	4594187	4594289	chr1.capped.1478	62	-	AT1G13390	0	proximal	UTR5	15.57	13.24	13.68	17	7.61	9.89	10.45	14.58	9.59
chr1	4594374	4594435	chr1.capped.1479	37	-	AT1G13390	0	proximal	UTR5	0.82	1.13	0.3	0.66	0.26	0.15	0.53	1.36	0.47
chr1	4601166	4601301	chr1.capped.1480	48	+	AT1G13410	-20	upstream	UTR5	0.56	0.83	0.24	0.28	1.23	0.88	1.52	1.16	1.57
chr1	4604838	4604882	chr1.capped.1481	2	+	AT1G13420	0	single-exon	UTR5	0.94	0.32	0.23	0.17	0.27	0.13	2.78	1.73	1.64
chr1	4608532	4608560	chr1.noncapped.1482	13	-	AT1G13440	0	distal	CDS	48.64	42.67	39.93	28.38	18.67	15.34	9.45	6.31	9.77
chr1	4610520	4610570	chr1.capped.1483	44	-	AT1G13440	0	proximal	UTR5	329.71	285.15	296	369.93	191	304.02	416.62	494.56	459.12
chr1	4612185	4612437	chr1.capped.1484	115	+	AT1G13448	0	proximal	NC	1.48	0.97	0.67	0.71	0.71	0.13	1.17	1.03	1.11
chr1	4615100	4615222	chr1.capped.1485	85	-	AT1G13450	0	proximal	UTR5	4.05	4.9	6.97	5.08	3.25	3.5	9.77	12.36	9.9
chr1	4615740	4615965	chr1.capped.1486	107	+	AT1G13460	0	proximal	UTR5	6.12	4.04	2.74	4.97	6.06	11.23	10.4	11.09	13.44
chr1	4641963	4642155	chr1.capped.1487	31	-	AT1G13560	0	proximal	UTR5	22.59	25.59	20.37	22.64	14.7	17.24	32.8	36.53	43.55
chr1	4644280	4644423	chr1.capped.1488	97	-	AT1G13570	0	proximal	UTR5	5.15	7.49	6.79	6.03	5.56	7.34	14.15	16.24	16.1
chr1	4646755	4647006	chr1.capped.1489	97	-	AT1G13580	0	proximal	UTR5	11.76	10.88	9.75	13.17	7.02	7.45	17.3	22.93	22.02
chr1	4647924	4647956	chr1.noncapped.1490	10	+	AT1G13590	0	proximal	UTR5	0	0	0	0.7	1.64	0	0	0	0
chr1	4673005	4673080	chr1.capped.1491	47	-	AT1G13630	0	proximal	UTR5	0.73	0.71	0.11	0.48	0.2	0.52	1.27	0.16	1.02
chr1	4674226	4674233	chr1.capped.1492	1	+	AT1G13635	0	proximal	UTR5	0.31	0.07	1.08	0.67	1.74	1.15	0.71	1.76	4.28
chr1	4679768	4679821	chr1.capped.1493	42	-	AT1G13640	0	proximal	UTR5	3.74	5.54	5.21	3.78	1.88	3.6	10.33	11.57	11.86
chr1	4682072	4682319	chr1.capped.1494	23	-	AT1G13650	0	proximal	UTR5	2.74	3.08	1.93	3.05	2.66	4.04	2.62	2.13	3.45
chr1	4688147	4688156	chr1.capped.1495	6	+	AT1G13670	0	single-exon	UTR5	0.17	1.07	1.7	0.78	0.27	0.4	1.17	2.42	3.11
chr1	4693285	4693379	chr1.capped.1496	44	+	AT1G13690	0	single-exon	UTR5	21.82	20.02	17.84	29.75	14.72	26.6	38.6	34.82	49.28
chr1	4695876	4696209	chr1.capped.1497	146	-	AT1G13700	0	proximal	UTR5	3.82	7.7	6.35	6.8	8.07	4.67	3.98	5.03	3.98
chr1	4704627	4704675	chr1.capped.1498	46	-	AT1G13710	0	proximal	UTR5	0.9	3.8	1.16	1.72	2.15	0.79	1.73	2.35	2.34
chr1	4709753	4710067	chr1.capped.1499	249	+	AT1G13730	0	proximal	UTR5	10.36	8.1	6.86	15.42	5.7	11.87	8.29	7.19	8.55
chr1	4713529	4713770	chr1.capped.1500	165	+	AT1G13740	0	single-exon	UTR5	5.05	3.68	2.54	6.22	1.14	4.35	6.39	9.16	10.46
chr1	4718087	4718307	chr1.capped.1501	132	-	AT1G13750	0	proximal	UTR5	0.74	0.56	0.27	0.09	0	0.14	1.02	1.68	1.18
chr1	4721642	4721730	chr1.capped.1502	64	+	AT1G13770	0	proximal	UTR5	2.59	3.54	2.66	4.55	4.13	6.51	11.16	8.34	5.94
chr1	4724518	4724691	chr1.capped.1503	89	+	AT1G13780	0	proximal	UTR5	2.11	1.65	2.36	2.32	1.29	2.7	1.91	1.98	1.8
chr1	4726749	4726853	chr1.capped.1504	13	+	AT1G13790	-7	upstream	UTR5	2.4	3	2.3	2.3	2.43	2.65	1.65	1.82	1.25
chr1	4733733	4733803	chr1.capped.1505	47	-	AT1G13800	0	proximal	UTR5	1.1	0.41	0.88	1	1	0.32	1.16	0.23	0.56
chr1	4734026	4734074	chr1.capped.1506	9	+	AT1G13810	0	proximal	UTR5	3.27	1.6	2.61	1.71	1.89	1.06	3.44	1.94	3.28
chr1	4735545	4735618	chr1.capped.1507	61	+	AT1G13820	0	proximal	UTR5	12.04	9.53	8.72	12.25	11.55	13.23	15.61	17.34	20.96
chr1	4740784	4741146	chr1.capped.1508	152	-	AT1G13830	0	proximal	UTR5	0.57	1.01	1.44	0.8	0.95	1.56	3.39	1.54	2.91
chr1	4746779	4746952	chr1.capped.1509	129	-	AT1G13860	0	proximal	UTR5	1.66	1.71	1.6	2.42	1.8	1.03	2.94	5.1	3.99
chr1	4748634	4748643	chr1.capped.1510	7	-	AT1G13870	0	proximal	UTR5	7.11	7.83	7.69	8.85	6.14	5.48	14.7	13.48	8.66
chr1	4748863	4748997	chr1.capped.1511	9	+	AT1G13880	0	proximal	UTR5	6.27	6.46	7.54	7.57	7.56	10.28	23.13	23.72	21.17
chr1	4751412	4751589	chr1.capped.1512	47	+	AT1G13890	0	proximal	UTR5	3.09	6.37	3.7	2.24	3.21	10.9	1.24	7.21	2.12
chr1	4753554	4753623	chr1.noncapped.1513	37	-	AT1G13900	0	distal	CDS	1.53	1.16	1.37	1.27	4.26	3.25	0.17	0.24	0.4
chr1	4755543	4755659	chr1.capped.1514	32	-	AT1G13900	0	proximal	UTR5	6.3	6.5	4.93	6.53	2.85	3.77	13.32	13.28	9.98
chr1	4755779	4755978	chr1.capped.1515	157	+	AT1G13910	0	proximal	UTR5	4.24	3.7	1.94	1.65	2.76	3.42	8.07	10.81	10.38
chr1	4758156	4758212	chr1.capped.1516	2	+	AT1G13920	0	proximal	CDS	0.64	1.52	0.97	0.69	0.9	0.52	2.05	1.47	1.8
chr1	4759799	4759960	chr1.capped.1517	101	-	AT1G13920	0	antisense	UTR3	2.76	4.5	0.56	1.92	1.51	0.57	1.1	1.43	2.36
chr1	4761039	4761055	chr1.capped.1518	2	+	AT1G13930	0	single-exon	UTR5	1043.79	937.91	262.34	1240.13	665.89	834.61	628.83	713.02	1324.42
chr1	4762325	4762495	chr1.noncapped.1519	118	-	AT1G13930	575	intronic antisense	UTR3	0.3	0.89	0.08	0.94	0	0.64	0	0	0
chr1	4762564	4762621	chr1.noncapped.1520	22	-	AT1G13940	0	single-exon	UTR3	0.65	0.07	0.04	0.73	0.65	0.25	0.2	0	0.24
chr1	4766424	4766571	chr1.capped.1521	113	-	AT1G13940	0	proximal	UTR5	0.44	0.4	0.42	0.6	0.35	0.19	2.09	1.39	0.39
chr1	4766711	4766888	chr1.capped.1522	21	-	AT1G13940	0	proximal	UTR5	1.52	1.44	1.07	0.9	0.11	0.69	1.04	2.43	1.19
chr1	4773523	4773665	chr1.capped.1523	71	+	AT1G13950	0	proximal	UTR5	7.17	7.47	10.24	10.93	6.38	18.02	8.19	14.24	18.42
chr1	4776271	4776634	chr1.capped.1524	259	+	AT1G13960	0	proximal	UTR5	4.17	3.22	1.8	6.64	2.86	7.02	7.6	11.15	13.45
chr1	4782461	4782542	chr1.capped.1525	67	-	AT1G13970	0	proximal	UTR5	6.79	32.56	21.03	7.08	10.69	20.13	3.45	28.92	7.96
chr1	4788511	4788621	chr1.capped.1526	44	+	AT1G13980	0	proximal	UTR5	3.6	4.76	2.57	3.08	1.14	3.41	7.72	6.47	5.94
chr1	4794653	4794815	chr1.capped.1527	110	+	AT1G13990	0	proximal	UTR5	4.82	6.04	4.7	11.46	3.65	9.45	11.37	12.83	16.23
chr1	4797255	4797485	chr1.capped.1528	131	+	AT1G14000	0	proximal	UTR5	10.51	9	8.61	15.34	8.06	15.73	20.68	20.56	22.9
chr1	4801800	4801853	chr1.capped.1529	40	-	AT1G14010	0	proximal	UTR5	26.96	30.03	21.18	29.08	24.51	28.38	52.18	42.03	36.25
chr1	4802572	4802851	chr1.capped.1530	99	+	AT1G14020	-48	upstream	UTR5	4.54	6.05	3.23	9.48	5.52	6.54	10.43	12.75	10.62
chr1	4807452	4807525	chr1.capped.1531	64	-	AT1G14030	0	proximal	UTR5	7.68	9.7	4.86	6.6	3.31	3.69	7.47	6.51	9.52
chr1	4810396	4810458	chr1.capped.1532	49	+	AT1G14040	0	proximal	UTR5	1.64	1.76	2.08	11.87	6.75	3.96	1.97	3.22	4.68
chr1	4810893	4810957	chr1.capped.1533	25	-	AT1G14040	0	antisense	CDS	0.97	1.34	0.24	0.89	0	0.6	0.89	0.79	1.48
chr1	4811054	4811189	chr1.capped.1534	47	-	AT1G14040	0	antisense	CDS	0.36	0.68	1.03	1.36	1.58	0.88	1.38	2	1.95
chr1	4811855	4811885	chr1.capped.1535	12	+	AT1G14040	0	distal	CDS	0.57	1	0.58	1.38	0.93	0.19	2.58	1.17	1.17
chr1	4818006	4818049	chr1.capped.1536	12	-	AT1G14060	0	single-exon	UTR5	15.3	14.24	16.62	24.39	19.24	12.44	27.36	17.6	26.82
chr1	4820398	4820579	chr1.capped.1537	31	-	AT1G14071	0	single-exon	NC	1.81	2.93	1.42	1.81	1.96	1.13	3.84	2.79	3.93
chr1	4827378	4827512	chr1.capped.1538	89	-	.	.	intergenic	.	1.51	1.95	1.46	1.88	2.3	2.64	2.13	1.72	1.49
chr1	4827854	4827869	chr1.capped.1539	4	+	AT1G14100	-102	upstream	UTR5	0	0.09	0.86	0.11	1.54	0.55	1.26	3.4	0.78
chr1	4837023	4837148	chr1.capped.1540	25	-	AT1G14130	0	distal	UTR5	1.56	0.25	1.26	1.81	0.71	0.79	1.05	3.37	3.83
chr1	4837445	4837732	chr1.capped.1541	160	-	AT1G14130	0	proximal	UTR5	3.8	2.76	3.05	4.65	4.48	3.42	6.18	6.91	5.57
chr1	4839591	4839694	chr1.capped.1542	38	-	AT1G14140	0	proximal	UTR5	4.62	6.27	5.49	6.03	3.03	7.21	11.15	9.88	11.56
chr1	4839806	4839870	chr1.capped.1543	54	+	AT1G14150	0	single-exon	UTR5	22.96	25.31	19.04	42.89	15	27.15	73.67	62.19	92.87
chr1	4845743	4845852	chr1.capped.1545	59	-	AT1G14170	0	proximal	UTR5	2.1	4.08	1.48	3.91	1.68	3.27	5.29	6.87	7.03
chr1	4845868	4845871	chr1.capped.1544	2	+	AT1G14170	0	antisense	UTR5	0.71	0.16	0.18	0.91	0	0.83	0.17	0	0.08
chr1	4847160	4847248	chr1.capped.1546	1	+	AT1G14180	0	proximal	UTR5	4.92	6.21	5.66	9.06	5.07	8.48	12.71	11.2	11.85
chr1	4849824	4849940	chr1.capped.1547	72	-	.	.	intergenic	.	2.36	1.96	5.51	2.14	5.19	6.33	1.8	7.52	3.66
chr1	4852520	4852641	chr1.capped.1548	51	+	AT1G14190	0	proximal	UTR5	0.63	0.62	0.54	0.17	0.31	0	0.52	0.37	1.18
chr1	4855160	4855324	chr1.capped.1550	35	-	AT1G14200	0	single-exon	UTR5	3.03	4.57	8.74	2.78	5.97	10.99	8.75	20.71	15.35
chr1	4855386	4855585	chr1.capped.1549	47	+	AT1G14205	-99	upstream	UTR5	1.38	1.48	1.61	2.4	1.89	2.37	2.7	2.11	1.81
chr1	4857950	4858028	chr1.capped.1551	6	-	AT1G14210	0	proximal	UTR5	9.31	8.36	12.26	12.89	5.6	8.06	13.66	14.75	23.53
chr1	4861246	4861311	chr1.capped.1552	27	+	AT1G14230	0	proximal	UTR5	6.25	6.47	3.68	11.62	6.6	14.66	17.24	12.39	18.57
chr1	4868388	4868499	chr1.capped.1553	110	+	AT1G14250	0	proximal	UTR5	0.2	0.52	0.39	0.38	0	0	0.25	1.17	1.18
chr1	4872852	4872913	chr1.capped.1554	3	+	AT1G14260	0	proximal	UTR5	1.96	1.71	1.41	2.17	0.83	2.38	7.25	3.22	9.43
chr1	4873020	4873175	chr1.capped.1555	20	+	AT1G14260	-76	upstream	UTR5	0.37	0.32	0.65	1.03	0.86	1.18	0.15	0.94	0.24
chr1	4877144	4877249	chr1.capped.1556	33	-	AT1G14270	0	proximal	CDS	15.26	17.73	11.59	16.44	13.93	10.71	36.77	34.58	38.92
chr1	4877425	4877708	chr1.capped.1557	201	+	AT1G14280	0	single-exon	UTR5	12.98	12.55	14.7	11.07	11.87	15.5	29.25	47.1	36.98
chr1	4881915	4882014	chr1.capped.1558	34	-	AT1G14290	0	proximal	UTR5	14.84	25.76	16.45	11.16	20.71	17.19	20.46	34.56	27.84
chr1	4884708	4884818	chr1.capped.1559	45	-	AT1G14300	0	proximal	UTR5	6.85	9.69	9.5	11.41	8.75	10.5	10.95	13.14	11.48
chr1	4884954	4885091	chr1.capped.1560	54	+	AT1G14310	0	proximal	UTR5	3.98	4.98	6.24	10.18	2.89	5.13	13.71	11.12	18.98
chr1	4888186	4888227	chr1.capped.1561	40	+	AT1G14320	0	proximal	UTR5	1063.57	669.74	567.79	1166.18	621.3	1075.13	1341.02	814.42	1388.3
chr1	4891940	4892062	chr1.capped.1562	88	-	AT1G14330	0	single-exon	UTR5	0.98	1.3	0.55	0.52	0.45	0.54	1.09	1.84	1.26
chr1	4892160	4892324	chr1.capped.1563	90	-	AT1G14330	0	single-exon	UTR5	2.73	3.39	1.81	3.13	2.76	1.92	7.02	9.55	6.25
chr1	4896413	4896508	chr1.noncapped.1564	56	+	.	.	intergenic	.	0	0.05	0	1.1	1.71	0.99	0.04	0	0.31
chr1	4897314	4897434	chr1.capped.1565	27	+	AT1G14340	-4	upstream	UTR5	2.26	1.94	3.76	2.74	1.31	5.15	6.04	4.13	5.57
chr1	4899083	4899176	chr1.capped.1566	79	+	AT1G14345	0	single-exon	UTR5	43.1	34.39	30.24	43.94	20.65	59.58	122.67	107.08	111.67
chr1	4907448	4908006	chr1.capped.1567	478	+	AT1G14350	0	proximal	UTR5	4.06	4.69	3.77	6.7	2.99	9.21	11.38	9.56	12.47
chr1	4908021	4908105	chr1.capped.1568	65	+	AT1G14350	0	proximal	UTR5	1.74	2.01	1.34	2.05	3.39	1.38	4.27	7.89	4.68
chr1	4908161	4908200	chr1.capped.1569	27	+	AT1G14350	-60	upstream	UTR5	0.44	0.32	0.17	0.31	1.02	2.35	0.7	0.55	1.91
chr1	4908364	4908436	chr1.capped.1570	54	+	AT1G14350	0	proximal	UTR5	7.52	4.98	4.42	8.29	11	7.82	14.05	12.89	28.38
chr1	4913068	4913139	chr1.capped.1571	54	-	AT1G14360	0	proximal	UTR5	13.6	14.49	15.6	15.73	14.46	14.16	29.95	25.19	17.88
chr1	4915569	4915672	chr1.capped.1572	9	+	AT1G14370	0	single-exon	UTR5	0.08	0.1	0.43	0.52	0.42	1.67	0.12	0.71	0.79
chr1	4921174	4921195	chr1.capped.1573	1	+	AT1G05083	0	single-exon	NC	0	0	0	0	0.66	0.76	0	0.08	0
chr1	4921273	4921429	chr1.capped.1574	66	-	AT1G14380	0	single-exon	UTR5	0.48	0.44	0.24	0.4	0.43	0.62	0.8	0.62	0.71
chr1	4921486	4921694	chr1.capped.1575	49	-	AT1G14380	0	single-exon	UTR5	6.66	6.07	5.38	8.37	4.72	8.03	9.5	11.67	14.07
chr1	4928595	4928713	chr1.capped.1576	14	-	AT1G14400	0	proximal	UTR5	59.76	70.18	70.09	53.62	64.39	57.69	112.53	133.79	89.51
chr1	4930844	4930967	chr1.capped.1577	52	-	AT1G14410	0	proximal	UTR5	13.74	17.65	12.41	20.19	12.72	14.69	20.77	16.62	27.62
chr1	4933443	4933608	chr1.capped.1578	63	-	AT1G14420	0	proximal	UTR5	7.07	39.39	19.52	6.77	18.97	21.23	1.57	23.86	1.48
chr1	4934145	4934368	chr1.capped.1579	139	+	AT1G14430	0	single-exon	UTR5	5.06	4.06	3.43	5.95	1.7	6.26	7.36	11.48	9.78
chr1	4940042	4940099	chr1.capped.1580	29	-	AT1G14440	0	distal	UTR5	1.56	1.67	1.08	1.56	0.94	1.48	3.23	2.11	4.47
chr1	4940678	4940919	chr1.capped.1581	98	-	AT1G14440	0	proximal	UTR5	17.97	17.6	13.05	16.1	8.41	6.79	20.1	19.02	19.83
chr1	4947541	4947630	chr1.capped.1582	30	-	AT1G14450	0	single-exon	CDS	120.45	142.95	144.1	185.78	143.64	168.46	338.82	270.19	321.69
chr1	4952861	4952981	chr1.capped.1583	84	-	AT1G14460	0	proximal	UTR5	2.22	2.98	1.58	3.07	2.79	3.83	3.08	4.36	3.6
chr1	4953050	4953329	chr1.capped.1584	63	-	AT1G14460	0	proximal	UTR5	1.83	1.51	0.64	1.73	1.79	3.14	2.06	1.94	1.66
chr1	4959333	4959428	chr1.capped.1585	46	-	AT1G14490	0	single-exon	CDS	1.23	2.6	2.54	0.95	0.66	0.4	3.38	3.49	2.36
chr1	4964237	4964523	chr1.capped.1586	187	-	AT1G14510	0	proximal	UTR5	15.77	20.62	17.68	19.09	13.84	16.47	38.19	46.12	38.62
chr1	4969998	4970234	chr1.capped.1587	14	-	AT1G14520	0	proximal	UTR5	6.53	5.78	3.55	6.09	3.38	8.03	14.03	5.89	7.83
chr1	4972059	4972123	chr1.noncapped.1588	63	-	AT1G14530	-62	intron	CDS	0	0.05	0.05	0	0	0	0.48	0.62	0.08
chr1	4973586	4973637	chr1.capped.1589	16	-	AT1G14530	0	proximal	UTR5	1.08	0.79	0.69	0.15	0.88	1.8	2.05	2.1	0.55
chr1	4973662	4973790	chr1.capped.1590	53	-	AT1G14530	0	proximal	UTR5	3.49	6.51	5.36	7.31	4.43	5.19	9.25	12.06	10.85
chr1	4980608	4980869	chr1.capped.1591	56	+	AT1G14560	0	proximal	UTR5	7.06	6.94	8.04	10.79	4.35	9.29	9.17	20.76	16.06
chr1	4983530	4983658	chr1.capped.1592	29	+	AT1G14570	0	proximal	UTR5	17.48	18.41	16.03	24.27	11.51	17.84	25.61	28.65	29.05
chr1	4989559	4989771	chr1.capped.1593	4	+	AT1G14580	0	proximal	UTR5	1.6	0.6	0.87	1.51	0.91	1.17	0.7	0.97	0.94
chr1	5000533	5000706	chr1.capped.1594	75	-	AT1G14590	0	proximal	CDS	4.71	6.06	5.46	6.68	5.61	4.86	10.06	11.43	8.54
chr1	5003396	5003618	chr1.capped.1595	110	-	AT1G14600	0	proximal	UTR5	1.56	1.68	0.84	1.5	2.73	1.95	2.04	3.5	2.68
chr1	5014353	5014547	chr1.capped.1596	145	-	AT1G14610	0	proximal	UTR5	13.38	15.97	12.07	19.59	17.98	16.59	12.93	13.25	12.83
chr1	5016535	5016632	chr1.capped.1597	32	-	AT1G14620	0	proximal	UTR5	14.12	15.36	19.67	15.56	12.58	15.14	23.75	15.57	20.73
chr1	5019949	5019978	chr1.capped.1598	6	+	AT1G14630	0	proximal	UTR5	2.37	2	4.16	1.33	2.76	3.17	2.5	2.42	3.5
chr1	5023433	5023496	chr1.capped.1599	4	+	AT1G14640	0	proximal	UTR5	0.75	1.14	0.71	1.39	1.19	0.5	0.35	1.3	1.64
chr1	5027645	5027731	chr1.capped.1600	51	+	AT1G14650	0	proximal	UTR5	6.22	7.76	7.72	9.54	4.34	11.59	7.59	13.59	11.65
chr1	5036419	5036566	chr1.capped.1601	57	-	AT1G14660	0	proximal	UTR5	1.12	0.77	0.66	0.53	1.41	0.35	0.96	1.79	1.34
chr1	5037592	5037659	chr1.capped.1602	20	+	AT1G14670	0	proximal	UTR5	28.04	22.28	17.62	32.08	17.97	21.08	35.19	47.92	47.63
chr1	5040754	5040891	chr1.capped.1603	4	+	AT1G14680	0	single-exon	UTR5	2.35	2.38	2.1	1.92	1.03	1.67	3.41	3.56	3.99
chr1	5042318	5042505	chr1.capped.1604	129	+	AT1G14685	0	proximal	UTR5	5.65	8.09	8.07	13	3.18	7.05	7.72	9.83	12.35
chr1	5042528	5042671	chr1.capped.1605	27	+	AT1G14685	0	proximal	UTR5	6.91	6.03	5.79	6.39	5.25	4.73	3.98	6.19	3.45
chr1	5046007	5046062	chr1.capped.1606	1	-	AT1G14686	0	single-exon	CDS	0.36	0	0.23	0.05	0	1.48	0.48	0.73	0.4
chr1	5047832	5048065	chr1.capped.1607	142	+	AT1G14687	0	single-exon	UTR5	2.37	3.22	2.34	2.76	1.34	2.68	5.87	4.04	5.23
chr1	5055013	5055079	chr1.capped.1608	24	-	AT1G14690	0	proximal	UTR5	0.85	0.92	0.4	0.73	0.53	0.55	0.73	1.21	0.4
chr1	5055157	5055292	chr1.capped.1609	98	-	AT1G14690	0	proximal	UTR5	5.21	6.61	7.5	6.09	3.15	6.94	12.67	14.65	8.37
chr1	5058693	5058795	chr1.capped.1610	27	+	AT1G14700	0	proximal	CDS	0.63	1.63	1.21	0.09	0.45	1.14	1.97	3.53	2.66
chr1	5064955	5065227	chr1.capped.1611	74	-	AT1G14710	0	proximal	UTR5	6.36	7.34	6.04	5.75	4.28	5.93	5.41	6.05	6.89
chr1	5068422	5068656	chr1.capped.1612	76	-	AT1G14720	0	proximal	UTR5	4.96	5.12	5.13	3.81	1.79	2.45	5.08	7.54	8.52
chr1	5073062	5073163	chr1.capped.1613	47	+	AT1G14730	0	proximal	UTR5	1.12	1.3	1.39	1.97	0.36	2.16	1.04	1.55	2.81
chr1	5077728	5077894	chr1.capped.1614	61	-	AT1G14740	0	proximal	UTR5	4.18	5.95	7.8	5.26	4.9	6.38	3.62	6.18	1.04
chr1	5082448	5082543	chr1.capped.1615	40	-	AT1G14750	0	proximal	UTR5	1.13	0.61	1.05	1.34	0.69	0.34	1.98	1.16	1.72
chr1	5083555	5083825	chr1.capped.1616	186	+	AT1G14755	0	proximal	UTR5	0.48	1.95	1.61	0.56	1.14	1.05	0.13	1.59	0.7
chr1	5085098	5085300	chr1.capped.1617	137	-	AT1G14760	0	proximal	UTR5	2.36	2.38	3.16	3.76	2.82	2.25	4.56	5.98	3.92
chr1	5088633	5088893	chr1.capped.1618	207	-	AT1G14770	0	proximal	UTR5	2.9	3.35	4.34	5.72	2.36	2.03	9.58	9.68	9.4
chr1	5097946	5098121	chr1.capped.1619	51	-	AT1G14790	0	proximal	UTR5	2.45	2.96	2	2.05	0.73	1.88	2.95	4.91	5.33
chr1	5102845	5102874	chr1.noncapped.1620	10	-	AT1G14810	0	single-exon	CDS	1.87	2.37	0.88	2.08	0.44	0.35	0	0	0.08
chr1	5104643	5104749	chr1.capped.1621	45	-	AT1G14810	0	proximal	UTR5	11.51	11.41	11.81	15.06	9.16	8.17	14.03	11.55	11.46
chr1	5106765	5107053	chr1.capped.1622	43	-	AT1G14820	0	proximal	UTR5	19.87	26.92	29.1	24.5	26.42	23.39	39.45	44.05	40.45
chr1	5107676	5107728	chr1.noncapped.1623	19	-	AT1G14830	0	distal	UTR3	11.72	8.05	5.53	4.48	4.76	6.12	1.21	2.06	1.02
chr1	5111594	5111681	chr1.capped.1624	48	-	AT1G14830	0	proximal	UTR5	18.84	21.16	14.86	18.01	7.46	15.83	29.41	32.05	19.59
chr1	5115319	5115492	chr1.capped.1625	142	-	AT1G14840	0	proximal	UTR5	7.44	8.8	7.63	6.39	5.89	4.3	10.33	11.12	9.54
chr1	5123368	5123589	chr1.capped.1626	120	-	AT1G14850	0	proximal	UTR5	2.47	3.37	1.52	2.45	1.4	1.15	2.29	3.13	2.53
chr1	5124694	5124888	chr1.capped.1627	47	+	AT1G14860	0	proximal	UTR5	1.26	0.61	2.91	2.49	0.77	4.6	2.56	4.16	4.16
chr1	5128575	5128614	chr1.noncapped.1628	2	-	AT1G14870	0	distal	UTR3	0	0	0.29	0	0	0.1	0	0.7	0.62
chr1	5129443	5129525	chr1.capped.1629	78	-	AT1G14870	0	proximal	UTR5	1.03	1.35	5.95	1.08	1.86	4.14	1.6	2.17	2.51
chr1	5136998	5137075	chr1.capped.1630	56	+	AT1G14890	0	single-exon	CDS	15	22.29	35.55	18.38	24.79	23.43	26.67	41.75	61.08
chr1	5137717	5137731	chr1.capped.1631	4	-	AT1G14890	0	antisense	UTR3	0.77	0.96	0.93	1.02	0.23	0.9	1.18	1.86	1.4
chr1	5139348	5139495	chr1.capped.1632	32	-	AT1G14900	0	proximal	UTR5	40.99	63.46	51.95	43.84	41.65	35.31	60.58	59.71	56.69
chr1	5143616	5143740	chr1.capped.1633	68	-	AT1G14910	0	proximal	UTR5	9.84	8.36	5.6	6.45	6.22	4.46	7.58	13.79	6.8
chr1	5149094	5149421	chr1.capped.1634	179	+	AT1G14920	0	single-exon	UTR5	9.92	9.05	8.39	12.07	4.46	9.16	14.03	15.09	15.73
chr1	5149443	5149490	chr1.capped.1635	36	+	AT1G14920	0	single-exon	CDS	1.52	1.5	1.02	3.46	0.73	1.1	1.91	1.56	2.35
chr1	5151725	5151789	chr1.capped.1636	63	-	.	.	intergenic	.	0.23	0	0.06	0.23	0.42	0.63	0	0.24	0
chr1	5164853	5165265	chr1.capped.1637	189	-	AT1G14970	0	proximal	UTR5	1.64	1.82	2.71	2.11	0.93	1.61	1.91	2.47	1.66
chr1	5166656	5166750	chr1.capped.1638	26	-	AT1G14980	0	proximal	UTR5	141.27	169.47	221.03	189.39	200.24	188.52	290.13	203.43	238.66
chr1	5168147	5168259	chr1.capped.1639	95	-	AT1G14990	0	proximal	UTR5	11.87	15.15	10.48	15.1	11.31	13.84	27.45	17.47	13.59
chr1	5168537	5168666	chr1.capped.1640	65	+	AT1G15000	0	single-exon	UTR5	3.87	3.94	6.74	7.45	5.51	5.88	5.63	3.8	8.92
chr1	5170380	5170424	chr1.noncapped.1641	43	-	AT1G15002	0	single-exon	NC	1.49	1.57	1.5	1.51	0.2	0.39	3.77	4.38	1.87
chr1	5170557	5170572	chr1.capped.1642	14	-	AT1G15002	-1	upstream	NC	5.53	2.21	1.85	8.61	6.11	8.02	3.32	1.01	2.82
chr1	5171179	5171210	chr1.capped.1643	27	+	AT1G15010	0	single-exon	UTR5	0.12	0.73	4.19	0.79	2.48	41.49	0.27	0.75	4.99
chr1	5176120	5176353	chr1.capped.1644	102	-	AT1G15020	0	proximal	UTR5	4.3	5.98	4.66	6.61	3.1	4.07	8.64	9.03	10.41
chr1	5176772	5176776	chr1.noncapped.1645	2	+	.	.	intergenic	.	0	0	0.02	0.46	0.62	1.67	0.03	0.28	0.12
chr1	5177507	5177622	chr1.capped.1646	53	+	AT1G15030	0	proximal	UTR5	5.56	4.77	5.59	6.54	1.63	6.85	6.68	9.54	8.91
chr1	5181286	5181389	chr1.capped.1647	102	-	AT1G15040	0	single-exon	UTR5	0.61	1.19	0.74	0.51	0.98	0.27	0.41	2.14	0.24
chr1	5186825	5187015	chr1.capped.1648	64	-	AT1G15060	0	proximal	UTR5	3.54	3.94	3.37	4.08	1.8	3.93	6.69	6.99	7.24
chr1	5187534	5187757	chr1.capped.1649	101	+	AT1G15080	0	proximal	UTR5	2.43	2.74	2.4	2.15	3.46	3.86	3.72	2.52	6.1
chr1	5192132	5192228	chr1.capped.1650	1	+	AT1G15085	-85	upstream	UTR5	2.73	2.69	4.44	3.94	1.85	4.24	4.38	1.72	3.9
chr1	5193257	5193425	chr1.capped.1651	102	+	AT1G15100	0	antisense	UTR3	0.23	0.38	0.39	0.64	1.14	0.79	1.2	1.51	1.01
chr1	5194165	5194205	chr1.capped.1652	33	-	AT1G15100	0	single-exon	UTR5	3.32	7.96	13.38	6.39	3.35	8.04	29.04	44.01	51.72
chr1	5198978	5199124	chr1.capped.1653	37	+	AT1G15110	0	proximal	UTR5	1.32	1.28	0.69	1.5	0.66	1.14	3.15	3.05	6.1
chr1	5199160	5199208	chr1.capped.1654	31	+	AT1G15110	0	proximal	UTR5	0.82	0.54	0.54	0.46	0	0.26	1.35	1.64	1.26
chr1	5199444	5199604	chr1.capped.1655	111	+	AT1G15110	0	proximal	UTR5	1.04	0.72	0.91	0.27	0.88	0.74	0.96	2.13	1.25
chr1	5202831	5202895	chr1.capped.1656	26	+	AT1G15120	0	proximal	CDS	114	116.83	168.57	165.54	96.14	187.15	137.05	131.32	128.72
chr1	5202957	5203031	chr1.capped.1657	12	+	AT1G15120	-95	intron	CDS	0.97	0.64	0.56	2.21	0.86	2.97	0.61	0.37	2.05
chr1	5209877	5209933	chr1.capped.1658	11	-	AT1G15130	0	proximal	UTR5	4.45	5.9	2.28	7.29	2.79	5.35	15.19	13.1	13.56
chr1	5211600	5211652	chr1.noncapped.1659	23	-	AT1G15140	0	proximal	CDS	1.52	1.23	1.5	0.83	0	0.23	0.65	0.67	0.16
chr1	5212099	5212485	chr1.capped.1660	126	-	AT1G15140	0	proximal	UTR5	24.74	23.14	11.49	24.25	14.83	16.34	34.02	31.63	41.19
chr1	5220065	5220225	chr1.capped.1661	46	-	AT1G15165	0	proximal	UTR5	1.14	1.75	1.84	1.4	1.16	1.19	3.52	2.29	2.43
chr1	5220383	5220686	chr1.capped.1662	75	+	AT1G15170	0	proximal	UTR5	2.38	1.51	2.1	2.55	0.84	1.87	5.85	4.74	3.68
chr1	5224012	5224148	chr1.capped.1663	102	-	AT1G15175	0	proximal	NC	2.3	4.16	2.32	3.52	3.36	2.04	3.39	3.25	1.18
chr1	5224247	5224463	chr1.capped.1664	172	+	AT1G15180	0	proximal	UTR5	3.25	4.1	4.1	3.56	1.06	8.25	4.26	4.45	5.46
chr1	5227068	5227275	chr1.capped.1665	166	+	AT1G15190	0	single-exon	UTR5	0.21	1.69	0.5	0.21	1.21	0	0.77	2.92	0.55
chr1	5227950	5227982	chr1.capped.1666	31	-	AT1G15190	0	antisense	CDS	0.08	0	0.31	0.33	0.43	0.1	0.62	0.34	0.71
chr1	5231021	5231089	chr1.capped.1667	31	-	AT1G15200	0	proximal	UTR5	20.11	24.33	17.49	21.71	24.29	14.21	34.61	30.31	37.56
chr1	5238030	5238108	chr1.capped.1668	53	+	AT1G15215	0	proximal	UTR5	3.72	2.73	3.15	2.51	2.37	3.17	4.25	4.85	6.17
chr1	5241426	5241592	chr1.capped.1669	71	-	AT1G15220	0	proximal	UTR5	3.14	5.62	4.12	2.97	4.29	4.29	7.63	8.18	7.28
chr1	5243210	5243250	chr1.capped.1670	16	-	AT1G15230	0	single-exon	UTR5	14.77	26.23	29.11	22.77	24.37	23.21	44.92	47.92	44.17
chr1	5243354	5243504	chr1.capped.1671	95	+	AT1G15240	0	proximal	UTR5	4.72	5.56	6.69	4.59	1.66	2.9	5.41	6.59	4.78
chr1	5249409	5249551	chr1.capped.1672	52	-	AT1G15250	0	proximal	UTR5	37.52	47.95	57.91	48.43	51.77	34.97	62.04	60.09	42.33
chr1	5249735	5249839	chr1.capped.1673	88	+	AT1G15260	0	single-exon	UTR5	161.54	167.03	166.87	442.85	175.96	321.83	377.92	423.85	504.39
chr1	5252088	5252101	chr1.capped.1674	7	-	AT1G15270	0	proximal	UTR5	298.01	341.67	349.42	410.51	318.06	342.51	658.45	511.44	536.84
chr1	5252291	5252417	chr1.capped.1675	51	+	AT1G15280	0	proximal	UTR5	9.06	11.5	12.25	19.34	13.56	16.47	9.99	14.3	13.28
chr1	5257388	5257415	chr1.noncapped.1676	7	-	AT1G15290	0	distal	CDS	0.05	0.58	0.98	0.15	0.98	0.48	0.35	0.8	1.35
chr1	5257418	5257461	chr1.noncapped.1677	42	-	AT1G15290	0	distal	CDS	0.89	1.67	1.64	1.69	1.03	0.64	0.51	1.15	1.35
chr1	5264921	5265135	chr1.capped.1678	20	-	AT1G15290	0	proximal	UTR5	7.44	6.67	6.34	7.52	6.67	6.36	4.79	4.85	5.47
chr1	5268377	5268606	chr1.capped.1680	36	-	.	.	intergenic	.	0.87	0.82	0.9	0.86	0.38	0.63	1.6	1.86	1.74
chr1	5268614	5268620	chr1.capped.1679	1	+	.	.	intergenic	.	0.38	0	0.05	0.35	1.39	0.98	0	0.09	0.24
chr1	5271949	5272089	chr1.capped.1681	24	-	AT1G15310	0	proximal	UTR5	2.49	3.13	2.1	2.37	3.42	3.38	4.58	7.97	4.54
chr1	5274024	5274133	chr1.capped.1682	77	-	AT1G15320	-28	upstream	UTR5	0.06	0.44	0.65	0.67	0.4	0	0.27	1.64	0.55
chr1	5277496	5277808	chr1.capped.1683	78	-	AT1G15340	0	proximal	UTR5	54.3	66.72	54.28	74.18	88.02	69.5	91.02	107.32	117.98
chr1	5279814	5279882	chr1.capped.1684	45	-	AT1G15350	0	proximal	UTR5	7.1	16.1	11.27	8.88	13.76	13.19	7.4	20.15	12.63
chr1	5281580	5281673	chr1.capped.1685	1	-	.	.	intergenic	.	0.23	0.56	0.41	0.71	0	0.13	0	3	0.55
chr1	5283334	5283389	chr1.capped.1686	49	+	AT1G15360	0	proximal	UTR5	28.37	7.55	12.97	42.49	10.02	14.17	11.28	19.43	32.38
chr1	5283449	5283458	chr1.capped.1687	3	+	AT1G15360	0	proximal	UTR5	1.5	0.79	1.85	2.63	1.11	0.96	0.63	2.29	2.73
chr1	5283531	5283601	chr1.capped.1688	9	+	AT1G15360	0	proximal	UTR5	57.6	30.33	33.26	108.42	22.8	61.41	31.36	37.82	41.55
chr1	5283704	5283707	chr1.noncapped.1689	2	-	AT1G15360	19	intronic antisense	CDS	4.77	2.54	4.68	4.09	3.64	2.66	0.92	1.53	0.16
chr1	5283803	5283812	chr1.capped.1690	8	+	AT1G15360	-175	intron	CDS	0.98	0.96	0.57	1.81	1.28	0.31	1.14	1.51	1.1
chr1	5283935	5283961	chr1.capped.1691	14	+	AT1G15360	-37	intron	CDS	0.25	0.54	0.34	0.54	0.29	0.64	0.53	1.79	1.25
chr1	5286806	5286925	chr1.capped.1692	64	+	AT1G15370	0	proximal	UTR5	0.66	0.28	0.31	1.73	0.93	0.25	0.76	0.78	1.49
chr1	5287019	5287124	chr1.capped.1693	43	+	AT1G15370	0	proximal	UTR5	43.5	42.39	52.86	63.9	41.83	85.1	128.81	97.58	160.7
chr1	5290723	5290854	chr1.capped.1694	25	+	AT1G15380	0	proximal	UTR5	1.82	9.72	4.8	1.25	4.67	6.5	2.59	8.08	1.73
chr1	5291673	5291894	chr1.capped.1695	137	+	AT1G15380	-213	intron	CDS	0.99	1.84	0.61	0.53	0.62	0.33	0.48	1.24	1.5
chr1	5293000	5293270	chr1.capped.1696	264	-	AT1G15385	0	single-exon	UTR5	0.17	5.61	2.73	0.53	1.78	0.45	0.18	1.32	0
chr1	5294661	5294683	chr1.capped.1697	4	+	AT1G15390	0	proximal	CDS	17.32	18.79	15	29.11	14.15	20.97	37.4	24.83	40.28
chr1	5296809	5296987	chr1.capped.1698	54	-	AT1G15400	0	proximal	UTR5	20.06	20.39	27.25	22.93	21.18	20.33	36.24	42.49	33.72
chr1	5297848	5297908	chr1.capped.1699	56	+	AT1G15410	-419	upstream	UTR5	0.13	0.2	0.85	0.43	0.74	0.35	0.58	0.51	0.55
chr1	5297967	5298179	chr1.noncapped.1701	210	-	AT1G05163	0	single-exon	NC	77.49	37.05	47.89	81.98	158.8	94.21	32.55	22.87	5.13
chr1	5298210	5298380	chr1.capped.1700	113	+	AT1G15410	0	proximal	UTR5	2.62	1.9	1.92	2.68	2.53	4.77	2.83	1.86	2.82
chr1	5298863	5298878	chr1.capped.1702	12	+	AT1G15410	0	distal	UTR5	0.59	0.41	0.28	0.12	0.22	0.32	0	0.65	0.47
chr1	5299092	5299167	chr1.capped.1703	67	+	AT1G15410	0	distal	UTR5	1.29	0.35	0.54	0.94	0.21	0.79	2.58	3.64	4.37
chr1	5299245	5299281	chr1.capped.1704	6	+	AT1G15410	0	distal	UTR5	0.16	0.2	0.19	0.41	0.29	0.79	2.66	0.64	0.79
chr1	5301415	5301437	chr1.capped.1705	5	-	AT1G15415	0	proximal	UTR5	64.2	75.43	115.41	80.46	103.83	176.12	76.23	225.85	125.72
chr1	5303339	5303437	chr1.capped.1706	41	-	AT1G15420	0	proximal	UTR5	12.45	16.69	15.78	16.04	12.89	13.43	20.96	18.4	20.64
chr1	5304313	5304383	chr1.capped.1707	4	+	AT1G15430	0	single-exon	UTR5	5	5.95	8.4	7.51	5.73	20.29	5.39	11.61	6.4
chr1	5309461	5309569	chr1.capped.1708	36	-	AT1G15440	0	proximal	UTR5	3.38	3.87	4	2.97	1.08	1.88	3.71	2.59	3.3
chr1	5313365	5313680	chr1.capped.1709	65	-	AT1G15460	0	proximal	UTR5	2.45	0.42	1	2.67	0.27	1.59	2.45	8.89	6.51
chr1	5314070	5314145	chr1.capped.1710	71	-	AT1G15460	-14	upstream	UTR5	1.12	2.62	5.41	1.05	1.05	2.09	3.61	6.03	4.07
chr1	5314243	5314267	chr1.capped.1711	21	-	AT1G15460	-137	upstream	UTR5	0.18	0.48	0.52	0.07	0.41	0.3	1.04	1.99	0.24
chr1	5315469	5315687	chr1.capped.1712	69	+	AT1G15470	0	proximal	UTR5	16.27	10.25	11.43	20.08	29	28.8	14.03	15.89	16.39
chr1	5316343	5316478	chr1.capped.1713	106	+	AT1G15470	-59	intron	CDS	0.93	2.18	3.33	0.68	4.92	2.68	2.22	5	4.98
chr1	5317913	5318101	chr1.capped.1714	122	+	AT1G15480	0	proximal	UTR5	3.27	2.68	2.39	3.74	0.79	2.52	2.19	2.06	1.73
chr1	5323763	5323918	chr1.capped.1715	122	-	AT1G15490	0	proximal	UTR5	1.99	2.8	2.04	1.77	1.6	2.01	4.84	5.46	5.64
chr1	5325303	5325375	chr1.capped.1716	22	+	.	.	intergenic	.	0.96	0.1	0.5	0.46	0	0.72	0.45	0.33	0.4
chr1	5326248	5326342	chr1.capped.1717	83	+	AT1G15500	0	proximal	UTR5	27.29	20.7	21.17	32.15	8.59	15.31	16.62	15.64	19.68
chr1	5329016	5329160	chr1.capped.1718	28	+	AT1G15510	-19	upstream	UTR5	1.95	1.58	1.06	2.07	1.12	1.66	1.72	1.33	1.26
chr1	5332296	5332390	chr1.capped.1719	78	+	AT1G15520	0	antisense	CDS	1.27	1.01	0.56	1.97	0.95	0.78	0.97	1.9	1.95
chr1	5341924	5342072	chr1.capped.1720	65	-	AT1G15530	-59	upstream	UTR5	1.64	2.63	3.4	1.33	2.87	1.55	0.99	1.55	1.26
chr1	5342117	5342135	chr1.capped.1721	17	-	AT1G15530	-204	upstream	UTR5	0.36	0.87	0.79	0.54	0.54	0.29	0.54	1.06	0.48
chr1	5346161	5346168	chr1.capped.1722	4	-	AT1G15550	0	proximal	UTR5	0.82	0.53	0.36	0.96	0.82	0.6	0.6	0.5	0.7
chr1	5356675	5356881	chr1.capped.1723	85	-	.	.	intergenic	.	0.4	1.79	0.57	0.29	0.48	0.75	0.04	1	0
chr1	5361993	5362116	chr1.capped.1724	26	+	AT1G15570	0	proximal	UTR5	4.49	5.21	5.64	4	2.86	6.33	7.61	4.77	5.26
chr1	5366369	5366516	chr1.capped.1725	127	-	AT1G15580	0	proximal	UTR5	0.93	0.58	1.02	0.92	0	0.62	1.03	3.12	1.64
chr1	5381029	5381197	chr1.capped.1726	60	+	AT1G15660	0	proximal	UTR5	6.11	4.58	3.57	4.92	1.29	5.75	6.58	5.5	6.56
chr1	5390009	5390087	chr1.capped.1727	25	+	AT1G15670	0	single-exon	UTR5	2.88	2.22	5.34	2.23	2.72	6.05	2.13	13.1	5.16
chr1	5398961	5399046	chr1.capped.1728	28	+	AT1G15690	0	proximal	UTR5	93.96	75.59	37.57	74.95	21.75	44.75	76.11	72.55	73.97
chr1	5403731	5403872	chr1.capped.1729	65	-	AT1G15700	0	single-exon	UTR5	3.86	3.92	6.08	3.08	3.51	3.11	15.12	9.61	8.07
chr1	5404340	5404420	chr1.capped.1730	34	+	AT1G15710	0	single-exon	UTR5	6.77	5.51	4.94	6.05	3.31	9.3	13.5	12.15	20.06
chr1	5404459	5404475	chr1.noncapped.1731	9	+	AT1G15710	0	single-exon	UTR5	0.32	0.46	0.25	0.6	0.5	0.03	0.32	0.62	0.48
chr1	5405617	5405655	chr1.noncapped.1732	36	+	AT1G15710	0	single-exon	UTR3	0.71	0.11	0.05	0.69	0.12	0.64	0.05	0	0.4
chr1	5405994	5406150	chr1.capped.1733	33	+	AT1G15720	0	single-exon	UTR5	1.57	0.75	2.18	2.47	0.37	1.95	2.26	3.4	2.83
chr1	5407555	5407592	chr1.noncapped.1734	3	-	AT1G15730	0	distal	CDS	1.77	0.78	0.32	1.57	1.09	1.31	0	0.15	0.08
chr1	5407604	5407647	chr1.noncapped.1735	16	-	AT1G15730	0	distal	CDS	0.41	0.71	0.89	1.44	1.68	0.37	0.37	0.19	0.4
chr1	5409911	5409999	chr1.capped.1736	39	-	AT1G15730	0	proximal	UTR5	4.98	4.97	5.21	4.59	2.11	2.68	8.05	8.3	6.32
chr1	5410903	5410951	chr1.capped.1737	8	+	AT1G15740	0	proximal	UTR5	5.21	3.78	4.67	5.2	12.69	9.25	11.48	19.46	13.1
chr1	5414568	5414575	chr1.noncapped.1738	5	+	AT1G15740	0	distal	UTR3	0.63	0	0.59	0	0	0.32	3.42	5.06	3.35
chr1	5420510	5420716	chr1.capped.1739	94	-	AT1G15750	0	proximal	UTR5	1.91	2.89	1.92	0.6	0.28	1.42	1.99	2.62	1.44
chr1	5420855	5421089	chr1.capped.1740	118	-	AT1G15750	0	proximal	UTR5	4.21	5.48	4.01	3.45	3.25	2.91	6.45	8.32	8.76
chr1	5425690	5425702	chr1.capped.1741	5	+	AT1G15760	0	single-exon	UTR5	3.23	2.16	5.19	2.15	3.99	2.02	4.97	2.78	8.02
chr1	5429443	5429646	chr1.capped.1742	143	-	AT1G15772	0	proximal	UTR5	0.72	0.85	2.57	0.98	1.83	0.5	0.47	2.34	1.18
chr1	5430357	5430389	chr1.capped.1743	22	+	AT1G15780	0	antisense	UTR3	0.53	0.21	0.17	0.29	0.11	0.11	0.69	0.57	0.55
chr1	5436435	5436616	chr1.capped.1744	114	-	AT1G15780	0	proximal	UTR5	1.29	1.15	0.39	0.62	0.86	0.89	1.32	1.61	2.36
chr1	5440006	5440148	chr1.capped.1745	70	-	AT1G15790	0	proximal	UTR5	1.13	0.99	1.75	1.41	1.29	0.52	1.92	2.12	3.36
chr1	5443615	5443686	chr1.capped.1746	67	-	AT1G15800	0	proximal	UTR5	4.11	5.91	6.43	5.27	6.54	5.45	9.02	16.47	11.31
chr1	5444368	5444506	chr1.capped.1747	90	+	AT1G15810	0	single-exon	UTR5	7.35	6.63	5.81	7.77	3.53	9.34	10.65	10.01	14.45
chr1	5447737	5447792	chr1.capped.1749	24	-	AT1G15820	0	single-exon	UTR5	486.75	514.96	416.15	629.9	403.87	462.27	620.91	673.72	1032.8
chr1	5447958	5448107	chr1.capped.1748	96	+	AT1G15830	-5	upstream	UTR5	0.45	0.14	0.11	0.31	2.28	1.99	0.3	0.11	0.24
chr1	5450073	5450215	chr1.noncapped.1750	112	+	AT1G15830	0	single-exon	UTR3	0.42	0.05	0.61	0.08	0	0.14	0	0.56	0.79
chr1	5454780	5455019	chr1.capped.1751	39	+	AT1G15860	0	proximal	UTR5	11.08	12.57	14.53	19.6	9.48	17.27	25.47	25.36	22.56
chr1	5457063	5457155	chr1.capped.1752	38	+	AT1G15870	0	proximal	UTR5	1.15	1.71	2.17	2.4	1.24	0.9	0.97	0.98	0.71
chr1	5460312	5460382	chr1.capped.1754	37	-	AT1G15880	0	proximal	UTR5	13.14	15.12	15.42	15.55	12.74	19.75	23.27	26.38	17.94
chr1	5460477	5460658	chr1.capped.1753	157	+	AT1G15885	0	proximal	CDS	6.99	7.27	8.03	6.3	9.38	13.2	14.74	14.74	12.5
chr1	5461134	5461143	chr1.capped.1755	5	-	AT1G15885	0	antisense	UTR3	0.13	0.38	0	0	1.03	1.25	0	0.21	0.31
chr1	5464212	5464425	chr1.capped.1756	115	+	AT1G15900	0	single-exon	UTR5	0.64	0.9	0.64	0.72	0.48	1.32	0.52	0.66	1.2
chr1	5465325	5465439	chr1.capped.1757	44	+	AT1G15910	0	proximal	UTR5	5.49	6.28	6.54	4.36	3.95	8.12	8.15	8.72	7.53
chr1	5469269	5469483	chr1.capped.1758	191	+	AT1G15920	0	single-exon	UTR5	8.25	11.53	11.7	9.91	13.61	17.37	25.96	29.05	30.59
chr1	5469553	5469582	chr1.capped.1759	4	+	AT1G15920	0	single-exon	UTR5	2.56	4.49	2.65	1.92	1.86	4.72	1.78	3.94	1.1
chr1	5471415	5471445	chr1.capped.1760	23	+	AT1G15930	0	proximal	UTR5	402.74	357.82	324.13	358.17	314.42	349.83	394	356.07	495.28
chr1	5473532	5473638	chr1.capped.1761	21	+	AT1G15940	0	proximal	UTR5	3.7	5.69	4.74	5.33	4.47	10.7	7.1	10.83	6.17
chr1	5476340	5476371	chr1.noncapped.1762	16	+	AT1G15940	0	distal	CDS	0.21	0	0.34	0	0.95	0.79	0	0.19	0
chr1	5478636	5478825	chr1.capped.1763	149	+	AT1G15950	0	proximal	UTR5	18.26	12.8	18.88	10.84	8.52	15.78	23.77	28.46	64.37
chr1	5481543	5481680	chr1.capped.1764	127	+	AT1G15950	-37	intron	CDS	0.26	0.04	0.21	0	0	0	0.86	0.58	1.34
chr1	5481880	5481906	chr1.noncapped.1765	5	+	AT1G15950	0	distal	CDS	1.68	0.95	2.08	0.78	0.66	0.92	0.22	0.39	0.24
chr1	5485069	5485154	chr1.capped.1766	43	-	AT1G15960	0	proximal	UTR5	0.86	2.06	2.06	1.36	0.68	1.12	1.18	1.32	1.01
chr1	5488549	5488591	chr1.capped.1767	30	-	AT1G15970	0	proximal	UTR5	0.9	0.78	0.49	0.42	0.38	0.97	3.36	2.18	1.49
chr1	5488772	5488936	chr1.capped.1768	93	-	AT1G15970	0	proximal	UTR5	9.95	9.08	7.8	12.05	5.34	7.92	34.44	27.44	34.47
chr1	5489240	5489426	chr1.capped.1769	38	+	AT1G15980	0	proximal	UTR5	7.09	5.78	5.13	6.59	3.36	9.71	10.99	10.16	8.45
chr1	5489489	5489550	chr1.noncapped.1770	29	+	AT1G15980	0	proximal	CDS	0.5	0.72	0.47	1.05	0.7	1.04	0.33	0.43	0.48
chr1	5489837	5489941	chr1.noncapped.1771	76	+	AT1G15980	0	distal	CDS	1.35	0.81	1.78	1.04	0	1.48	0.37	0.43	0.24
chr1	5489947	5489970	chr1.noncapped.1772	14	+	AT1G15980	0	distal	CDS	0.18	0.4	0.05	0.31	0.64	0.83	0	0	0
chr1	5490907	5490952	chr1.noncapped.1773	28	+	AT1G15980	0	distal	CDS	1.63	1.42	1.35	0.94	0.65	0.38	0.62	0.15	0.55
chr1	5494527	5494585	chr1.capped.1774	8	+	AT1G16000	0	proximal	UTR5	47	44.07	38.51	53.47	45.35	54.72	68.53	59.14	88.35
chr1	5497686	5497768	chr1.capped.1775	33	-	AT1G16010	0	proximal	UTR5	15.51	14.82	11.75	17.53	6.15	11.63	40.52	36.49	27.43
chr1	5498092	5498252	chr1.capped.1776	79	+	AT1G16020	0	proximal	UTR5	5.1	6.45	4.67	6.71	3.99	3.73	11.65	12.19	21.07
chr1	5501878	5501891	chr1.capped.1777	8	-	AT1G16022	-31	upstream	UTR5	1.2	0.74	1.68	0.97	0.34	1.91	1.36	2.54	1.02
chr1	5504464	5504543	chr1.capped.1778	70	-	AT1G16030	0	single-exon	UTR5	0.83	1.28	1.34	2.24	1.84	0.34	2.75	2.71	1.55
chr1	5504680	5504747	chr1.capped.1779	37	+	AT1G16040	0	proximal	UTR5	8.02	8.93	8.28	12.37	7.89	9.42	22.84	17.28	30.88
chr1	5508431	5508592	chr1.capped.1780	91	+	AT1G16060	0	proximal	UTR5	24.32	12.79	9.8	32.05	5.75	29.25	34.19	23.81	22.85
chr1	5511047	5511143	chr1.capped.1781	80	+	AT1G16060	-18	intron	CDS	0.62	0.5	0.68	0.81	0.26	0.92	0.66	0.53	1.41
chr1	5513670	5513989	chr1.capped.1782	153	-	AT1G16070	0	proximal	UTR5	1.96	1.81	2.49	2.93	2.31	1.9	2.9	3.8	4.92
chr1	5514273	5514441	chr1.capped.1783	111	+	AT1G16080	0	proximal	UTR5	24.75	27.11	26.17	33.4	16.71	44.2	38.83	33.31	39.07
chr1	5539686	5539899	chr1.capped.1784	109	-	AT1G16170	0	proximal	UTR5	12.79	20.01	18.21	13.55	11.51	19.63	25.16	25.54	24.13
chr1	5540436	5540565	chr1.capped.1785	57	+	AT1G16180	0	proximal	UTR5	34.24	42.67	36.14	52.28	21.96	40.01	113.92	136.11	169.42
chr1	5543134	5543232	chr1.capped.1786	8	+	AT1G16190	0	proximal	UTR5	9.87	8.38	11.8	16.65	7.69	15.52	9.21	7.5	11.85
chr1	5547477	5547656	chr1.capped.1787	26	-	AT1G16210	0	proximal	UTR5	21.21	25.56	21.3	26.57	22.61	21.33	42.55	52.68	55.97
chr1	5548203	5548472	chr1.capped.1788	129	+	AT1G16220	0	proximal	UTR5	0.56	1.08	1.08	1.04	0.26	1.49	0.52	0.55	1.73
chr1	5548579	5548686	chr1.capped.1789	43	+	AT1G16220	0	proximal	UTR5	1.46	1.24	1.6	0.61	0	0.81	1.46	1.03	2.04
chr1	5556759	5556817	chr1.capped.1790	15	-	AT1G16240	0	proximal	UTR5	25.63	38.1	41.04	34.44	30.56	39.01	57.82	74.55	57.51
chr1	5556907	5557051	chr1.capped.1791	83	+	AT1G16250	0	proximal	UTR5	1.46	1.34	1.76	1.25	0.33	1.59	1.25	2.51	1.42
chr1	5562014	5562166	chr1.capped.1792	94	-	AT1G16260	0	proximal	UTR5	1.18	1.33	1.53	0.79	1.16	0.98	1.39	1.87	2.89
chr1	5563078	5563281	chr1.capped.1793	98	+	AT1G16270	0	proximal	UTR5	5.88	4.05	3.1	9.57	10.29	6.15	4.61	7.27	4.79
chr1	5570543	5570613	chr1.capped.1794	11	-	AT1G16280	0	proximal	UTR5	6	4.71	4.53	5.48	3.66	4.37	12.96	13.12	9.07
chr1	5570876	5570910	chr1.noncapped.1795	10	-	AT1G16290	0	distal	UTR3	0	0.07	0.09	0	0.94	0.89	0	0.58	0
chr1	5573735	5573975	chr1.capped.1796	26	-	AT1G16290	0	proximal	UTR5	1.33	2.15	2.64	0.88	2.03	2.95	1.2	6.87	2.24
chr1	5574285	5574345	chr1.capped.1797	22	+	AT1G16300	0	proximal	UTR5	4.62	3.98	3.59	9.36	1.74	3.45	10.77	7.14	14.19
chr1	5578226	5578500	chr1.capped.1798	256	+	AT1G16310	0	proximal	CDS	2.34	2.31	2.95	4.57	3.75	6.09	7.56	8.82	10.64
chr1	5578787	5578932	chr1.capped.1799	109	+	AT1G16310	0	proximal	CDS	0.67	0.18	0.28	0.15	0.91	0.74	0.66	1.08	1.41
chr1	5580791	5580953	chr1.capped.1800	63	+	AT1G16320	0	proximal	UTR5	13.24	9.94	16.58	13.68	11.82	22.02	34.01	41.52	45.35
chr1	5587426	5587529	chr1.capped.1801	35	-	AT1G16330	-1	upstream	UTR5	0.86	1.39	0.99	1.13	0.92	1.34	2.84	3.22	3.37
chr1	5590581	5590722	chr1.capped.1802	45	-	AT1G16340	0	proximal	UTR5	6.01	10.89	7.78	7.54	6.51	6.21	13.08	21.3	16.29
chr1	5590848	5590956	chr1.capped.1803	55	+	AT1G16350	0	proximal	UTR5	14	12.59	11.79	13.24	8.25	14.51	18.11	14.01	18.04
chr1	5595689	5595954	chr1.capped.1804	121	-	AT1G16360	0	proximal	UTR5	2.15	3.11	3.01	3.19	1.43	5.23	3.73	9.82	3.45
chr1	5596602	5596729	chr1.capped.1805	82	+	AT1G16370	0	single-exon	UTR5	0	0.08	0.15	0	0.81	0.84	0.18	0	0.56
chr1	5601344	5601477	chr1.capped.1806	87	-	AT1G16380	-65	upstream	UTR5	0.71	0.75	0.38	0.67	0	0.48	0.18	2.09	0.63
chr1	5614598	5614669	chr1.capped.1807	29	+	AT1G16430	0	proximal	UTR5	8.5	9.84	12.7	13.97	11.31	11.57	20.52	12.77	19.92
chr1	5617771	5617922	chr1.capped.1808	35	+	AT1G16445	0	proximal	UTR5	1.18	1.92	1.65	2.34	0.69	1.49	1.27	2.21	2.03
chr1	5622517	5622633	chr1.capped.1809	52	-	AT1G16460	0	proximal	UTR5	17.12	21.33	15.86	22.07	13.67	20.67	52.69	37.09	60.19
chr1	5622768	5622883	chr1.capped.1810	101	+	AT1G16470	0	proximal	UTR5	31.75	29.16	30.27	35.46	21.01	36.64	54.05	52.55	48.75
chr1	5628940	5629084	chr1.capped.1811	82	-	AT1G16480	-10	upstream	UTR5	0.7	0.96	0.66	1.48	0.48	0.62	0.67	0.78	1.16
chr1	5629181	5629287	chr1.capped.1812	63	+	AT1G05227	0	single-exon	NC	1.44	1.26	1.47	1.54	0.44	1.67	2.89	2.91	4.62
chr1	5630861	5630895	chr1.capped.1813	30	-	AT1G16490	0	proximal	UTR5	0.3	1.03	1.65	1.09	0	0.66	2.36	0.82	0.55
chr1	5638954	5639066	chr1.capped.1814	79	+	AT1G16500	0	proximal	UTR5	5.81	5.48	8.98	7.56	4.87	10.46	4.75	3.37	2.19
chr1	5645182	5645379	chr1.capped.1815	91	-	AT1G16510	0	single-exon	UTR5	2.26	5.45	6.06	4.2	8.28	7.31	3.32	6.08	3.05
chr1	5647843	5648070	chr1.capped.1816	86	-	AT1G16515	0	single-exon	UTR5	7.27	7.31	6.8	8.25	9.47	11.49	9.15	9.05	5.52
chr1	5648516	5648821	chr1.capped.1817	243	+	AT1G16520	0	proximal	UTR5	8.98	8.1	11.26	11.15	6.07	12.27	16.69	16.31	27.06
chr1	5651083	5651107	chr1.capped.1818	2	+	AT1G16520	0	distal	UTR3	0.12	0.2	0.07	0.34	0.22	1.1	0	0.08	0.32
chr1	5659354	5659449	chr1.capped.1819	55	+	AT1G16540	0	proximal	UTR5	1.12	1.44	0.8	0.83	0.14	1.68	1.3	1.86	3.12
chr1	5665468	5665633	chr1.capped.1820	129	+	.	.	intergenic	.	0.46	0.22	0.51	0.47	0.52	0.39	1.18	0.84	0.87
chr1	5668373	5668454	chr1.capped.1821	48	+	AT1G16560	0	single-exon	UTR5	9.07	9.09	8.93	10.75	8.13	7.68	14.05	19.59	23.31
chr1	5673502	5673600	chr1.capped.1823	84	-	AT1G16570	0	proximal	UTR5	4.81	10.13	5.99	6.76	6.18	6.45	11.02	9.78	6.18
chr1	5673714	5673875	chr1.capped.1822	51	+	AT1G16590	0	proximal	UTR5	3.17	2.61	2.53	3.97	1.53	3.48	7.71	4.95	6.1
chr1	5678684	5678820	chr1.capped.1824	26	-	AT1G16610	0	proximal	UTR5	31.64	37.76	31.82	42.58	24.99	31.04	65.12	61.9	93.56
chr1	5684784	5684945	chr1.capped.1825	71	-	AT1G16630	0	single-exon	UTR5	1.73	3.2	2.07	1.96	1.47	0.8	3.45	4.45	3.22
chr1	5686176	5686181	chr1.noncapped.1826	2	-	AT1G16635	0	single-exon	NC	55.64	27.89	17.44	0.48	0.28	0.39	20.62	11.02	6.31
chr1	5686336	5686343	chr1.capped.1827	1	-	AT1G16635	0	single-exon	NC	3	3.2	3	3.4	9.61	5.14	6.31	4.85	2.26
chr1	5686528	5686734	chr1.capped.1828	69	+	AT1G16640	0	proximal	UTR5	2.38	3.57	4.83	1.79	0.8	1.22	3.74	5.23	3.37
chr1	5686643	5686646	chr1.capped.1829	2	-	AT1G16635	-278	upstream	NC	0.34	0.27	0.27	0.19	0.6	1.08	0.62	0.3	0
chr1	5687875	5688008	chr1.capped.1830	72	+	AT1G16650	0	proximal	UTR5	1.15	1.08	1.25	2.19	0.25	3.17	3.58	2.34	5.38
chr1	5697205	5697377	chr1.capped.1831	118	+	AT1G16670	0	proximal	UTR5	1.66	1.29	1.1	1.33	0.19	2.04	1.2	2.48	2.12
chr1	5702088	5702288	chr1.capped.1832	73	+	AT1G16680	0	proximal	UTR5	2.46	2.02	2.05	1.88	0.76	1.93	1.41	2.26	1.66
chr1	5702305	5702384	chr1.capped.1833	24	+	AT1G16680	0	proximal	UTR5	1.08	1.18	1.23	0.37	0.24	0.46	1.81	0.87	1.74
chr1	5705953	5706215	chr1.capped.1834	201	+	AT1G16690	0	proximal	UTR5	0.93	2.4	2.57	1.78	0.86	2.18	4.32	5.31	7.04
chr1	5709723	5709825	chr1.capped.1835	53	+	AT1G16700	0	proximal	UTR5	47.97	42.63	40.12	63.53	29.61	68.72	82.96	70.8	104.33
chr1	5709876	5709935	chr1.capped.1836	10	+	AT1G16700	-78	intron	UTR5	0.26	0.07	0.87	0.35	0	0.42	0.49	0.47	0.78
chr1	5712058	5712207	chr1.capped.1837	97	+	AT1G16705	0	proximal	UTR5	22.35	22.91	25.57	37.21	14.96	36.11	23.09	19.77	15.18
chr1	5713841	5714150	chr1.capped.1838	209	+	AT1G16710	0	proximal	UTR5	4.24	3.79	2.29	3.7	4.8	4.55	2.08	3.93	4.69
chr1	5722857	5723126	chr1.capped.1839	61	+	AT1G16720	0	single-exon	UTR5	14.13	10.37	10.18	26.48	29.37	31.6	25.31	42.04	29.19
chr1	5727065	5727429	chr1.capped.1840	46	-	AT1G16730	0	single-exon	CDS	11.91	9.73	12.19	18.74	12.76	14.42	31.19	28.53	16.48
chr1	5727614	5727750	chr1.capped.1841	92	+	AT1G16740	0	proximal	UTR5	34.64	30.51	29.85	58.68	58.97	38.95	23.55	19.72	28.53
chr1	5731693	5732035	chr1.capped.1842	176	-	AT1G16750	0	proximal	UTR5	4.96	4.95	5.51	5.9	2.95	6.25	8.55	9.73	7.14
chr1	5734069	5734162	chr1.capped.1843	67	+	AT1G16760	-53	upstream	UTR5	3.4	2.27	2.01	8.34	18.54	26.56	1.68	10.47	3.36
chr1	5738750	5738799	chr1.noncapped.1844	17	-	AT1G16770	0	antisense	CDS	0.37	0.61	0.38	1.1	2.7	1.2	0.67	0.7	0.47
chr1	5744040	5744259	chr1.capped.1845	174	-	AT1G16780	0	proximal	UTR5	2.92	3.7	3.95	4.43	1.47	2.85	3.32	4.17	3.91
chr1	5744544	5744640	chr1.capped.1846	8	+	AT1G16790	0	single-exon	UTR5	7.86	11.36	8.61	18.84	9.85	14.77	22.3	16.43	19.89
chr1	5755390	5755500	chr1.capped.1847	16	-	AT1G16800	0	proximal	UTR5	1.19	1.4	0.7	0.65	1.31	0.75	0.77	0.68	0.72
chr1	5755614	5755671	chr1.capped.1848	25	+	AT1G16810	0	proximal	UTR5	53.18	47.66	21.83	119.2	52.07	87.45	74.65	55.69	55.5
chr1	5758200	5758377	chr1.capped.1849	73	-	AT1G16820	0	proximal	CDS	2.31	3.47	2.98	1.49	2.65	2.1	3.94	4.71	4.31
chr1	5758774	5758900	chr1.capped.1850	84	+	AT1G16825	0	proximal	UTR5	7.53	5.26	7.85	10.76	9.38	12.69	16.05	18.36	15.59
chr1	5760613	5760733	chr1.capped.1851	9	+	AT1G16830	-3	upstream	UTR5	1.2	0.54	0.74	0.53	0.77	1.92	2.45	0.77	1.88
chr1	5762500	5762603	chr1.noncapped.1852	34	+	AT1G16830	0	single-exon	CDS	0.83	1.34	0.27	0	0.41	0	3.33	0.82	1.79
chr1	5763946	5764170	chr1.capped.1853	126	-	AT1G16840	0	single-exon	UTR5	14.66	22	25.36	12.89	17.6	15.68	29.34	43.18	39.38
chr1	5765591	5765670	chr1.capped.1854	59	-	AT1G16850	0	proximal	UTR5	4.2	3.8	1.95	4.08	2.45	3.4	4.53	7.28	5.63
chr1	5767282	5767496	chr1.capped.1855	60	+	AT1G16860	0	proximal	UTR5	7.43	7.67	4.43	10.16	13.46	10.27	8.49	8.71	8.16
chr1	5770918	5770937	chr1.noncapped.1856	12	-	AT1G16870	0	distal	UTR3	0.54	0.62	0.24	0	0	0	0.33	0	0
chr1	5773102	5773268	chr1.capped.1857	109	-	AT1G16870	0	proximal	UTR5	9.51	12.86	7.94	10.48	5.94	7.18	11.64	7.49	12.96
chr1	5773551	5773778	chr1.capped.1858	156	+	AT1G16880	0	proximal	UTR5	108.32	85.47	88.8	120.61	45.36	97.53	189.47	194.18	237.65
chr1	5778398	5778484	chr1.capped.1859	25	-	AT1G16890	0	proximal	UTR5	97.57	101.88	102.85	108.7	77.39	94.04	179.6	189.02	215.53
chr1	5782323	5782439	chr1.capped.1860	50	-	AT1G16900	0	proximal	UTR5	6.78	9.25	4.59	6.79	2.23	6.23	15.36	15.11	17.63
chr1	5787012	5787129	chr1.capped.1861	44	-	AT1G16916	0	proximal	CDS	22.05	27.32	19.57	34.16	26.4	27.68	47.04	38.08	37.9
chr1	5787252	5787343	chr1.capped.1862	87	-	AT1G16920	0	distal	UTR3	0.86	0.84	0.5	0.69	1.08	0.25	2.34	1.76	1.02
chr1	5789179	5789260	chr1.capped.1863	44	-	AT1G16920	0	single-exon	UTR5	27.93	27.26	28.34	26.48	21.25	23.36	35.04	30.18	34.94
chr1	5789686	5789789	chr1.capped.1864	27	+	AT1G16930	0	proximal	UTR5	0.79	0.78	0.88	2.58	0	1.14	2.35	2.55	4.31
chr1	5795974	5795988	chr1.capped.1865	10	+	AT1G16950	0	single-exon	UTR5	0	0	0	0	0.52	0.18	2.45	2.71	0.62
chr1	5799720	5800010	chr1.capped.1866	162	+	AT1G16960	0	proximal	UTR5	10.02	8.51	9.94	14.6	9.65	15.07	13.41	12.95	6.9
chr1	5805763	5805817	chr1.capped.1867	35	-	AT1G16970	0	proximal	UTR5	2.57	4.68	3.44	2.35	2.17	3.11	4.96	6.28	7.34
chr1	5820099	5820278	chr1.capped.1868	143	+	AT1G17020	0	proximal	UTR5	0.11	0.56	0.18	0.22	0	0.28	1.15	2.15	1.26
chr1	5822246	5822482	chr1.capped.1869	202	+	AT1G17030	0	proximal	UTR5	1.27	1.09	0.69	1.27	3.17	2.86	2.43	4.22	6.7
chr1	5824288	5824424	chr1.noncapped.1870	24	+	AT1G17030	0	distal	CDS	2.26	2.28	1.73	2.6	5.22	4.65	1.35	1.82	0.4
chr1	5824782	5825000	chr1.capped.1871	198	+	AT1G17040	0	proximal	UTR5	1.09	2.16	1.58	1.19	1.22	1.64	3.01	3.13	4.77
chr1	5828899	5828978	chr1.capped.1872	34	+	AT1G17050	0	proximal	UTR5	5.7	2.6	2.11	9.45	8.37	12.53	11.28	8.75	8.85
chr1	5829006	5829037	chr1.capped.1873	14	+	AT1G17050	0	proximal	UTR5	0.14	0.09	0.14	0	0	0.76	0.82	0.73	0.63
chr1	5829091	5829190	chr1.capped.1874	81	+	AT1G17050	0	proximal	UTR5	10.63	5.07	5.32	14.32	15.39	16.06	20.83	23.39	15.32
chr1	5835261	5835365	chr1.capped.1875	73	-	AT1G17060	0	proximal	UTR5	0.23	0.32	0.71	0.15	0	0.56	0.87	0.43	0.63
chr1	5837510	5837729	chr1.capped.1876	81	+	AT1G17070	0	single-exon	UTR5	2.58	3.08	1.8	7.14	2.22	3.25	2.91	3.52	4.78
chr1	5841551	5841676	chr1.capped.1877	14	-	AT1G17080	0	proximal	UTR5	30.88	34.87	36.57	51.19	26.88	45.77	94.83	97.87	91.1
chr1	5842739	5842975	chr1.capped.1878	45	-	AT1G17090	0	proximal	UTR5	3	3.26	4.17	4.01	6.67	1.81	5.19	3.83	4.25
chr1	5844189	5844387	chr1.capped.1879	97	-	AT1G17090	0	proximal	UTR5	0.58	0.78	0.69	0.54	0.53	0.54	1.85	0.53	1.33
chr1	5844622	5844766	chr1.capped.1880	121	+	AT1G17100	0	proximal	UTR5	72.52	86.63	86.68	157.39	52.34	108.13	232.37	220.64	209.28
chr1	5845695	5845724	chr1.noncapped.1881	27	-	AT1G17110	0	distal	UTR3	0.07	0	0.06	1.08	0.61	0.24	0	0	0.16
chr1	5850726	5850884	chr1.capped.1882	24	-	AT1G17110	0	proximal	UTR5	5.86	7.8	7.83	8.58	5.39	5.91	13.7	12.62	16.8
chr1	5851878	5852015	chr1.capped.1883	74	+	AT1G17120	0	single-exon	UTR5	5.85	6.64	6.36	10.15	5.57	6.32	16.24	19.82	25.22
chr1	5854143	5854205	chr1.capped.1884	35	+	AT1G17130	0	proximal	UTR5	14.62	15.25	16.86	31.67	14.78	29.69	44.83	39.83	53.69
chr1	5858137	5858223	chr1.capped.1885	5	-	AT1G17140	-186	intron	UTR5	2.1	2.6	1.3	2.91	1.85	1.57	3.94	4.43	3.98
chr1	5858319	5858649	chr1.capped.1886	130	-	AT1G17140	-4	upstream	UTR5	19.71	22.16	20.38	19.57	12.75	13.88	27.88	33.99	31.7
chr1	5862636	5862730	chr1.capped.1887	40	-	AT1G17145	0	proximal	UTR5	6.05	8.41	7.48	6.67	3.82	6.45	11.66	12.54	9.6
chr1	5863979	5864036	chr1.capped.1888	24	-	AT1G17147	0	single-exon	UTR5	0.06	0.06	0.26	0.05	0.6	0.65	0	0.35	0
chr1	5867575	5867714	chr1.capped.1889	64	+	AT1G17160	0	proximal	UTR5	5.21	5.93	6.45	11.02	4.03	4.8	16.64	18.73	26.6
chr1	5869694	5869924	chr1.capped.1890	45	+	AT1G17170	0	proximal	UTR5	1.54	1.17	0.99	2.69	0.92	1.79	5.35	4.43	5.8
chr1	5872139	5872196	chr1.capped.1891	15	+	AT1G17180	0	proximal	UTR5	1.16	0.25	0.59	1.07	0.64	0.81	0.25	0.25	0.55
chr1	5875249	5875459	chr1.capped.1892	130	+	AT1G17190	0	proximal	UTR5	13.56	13.88	13.42	10.93	6.68	15.71	9.72	13.81	19.11
chr1	5878406	5878495	chr1.capped.1893	40	+	AT1G17200	0	proximal	UTR5	80.85	95.01	88.97	113.83	76.68	103.83	105.29	144.51	134.16
chr1	5884658	5884805	chr1.capped.1894	94	-	AT1G17210	0	proximal	UTR5	15.33	14.85	16.75	13.35	14.77	10.41	15.12	15.84	15.07
chr1	5885044	5885230	chr1.capped.1895	72	+	AT1G17220	0	proximal	UTR5	8.76	9.03	6.21	7.89	4.29	8.14	11.44	11.96	6.97
chr1	5891031	5891127	chr1.capped.1896	6	+	AT1G17230	0	single-exon	UTR5	0.33	0.27	0.27	0.15	0.2	0	0.74	1.34	0.56
chr1	5895650	5895723	chr1.capped.1897	66	-	AT1G17235	0	antisense	UTR3	0.7	0.75	0.85	0.32	0.64	0.19	0.56	0.65	0.64
chr1	5895848	5895990	chr1.capped.1898	48	+	AT1G17235	0	single-exon	UTR3	0.35	1.49	0.72	1.08	1.77	1.13	0	1.21	0.24
chr1	5899947	5900108	chr1.capped.1899	7	+	AT1G17255	-17	upstream	NC	1.98	0.56	0.37	0.77	0.32	0.25	2.16	2.12	2.27
chr1	5911607	5911712	chr1.capped.1900	100	-	AT1G17270	0	proximal	UTR5	2.23	2.42	1.38	2.59	2.36	1.87	5.61	5.22	4.13
chr1	5919993	5920104	chr1.capped.1901	39	-	AT1G17280	0	proximal	UTR5	17.89	19.66	22.61	24.52	13.01	21.13	48.93	61.45	62
chr1	5922514	5922789	chr1.capped.1902	260	+	AT1G17290	0	proximal	CDS	24.84	26.9	20.43	37.39	22.81	34.35	47.21	39.36	64.34
chr1	5922821	5922852	chr1.capped.1903	7	+	AT1G17290	0	proximal	CDS	3.78	2.84	2.07	5.4	1.38	1.7	3.8	6.35	4.83
chr1	5923040	5923107	chr1.capped.1904	8	+	AT1G17290	-543	intron	CDS	0.22	0	0.35	0.41	0	0.47	0.56	0.83	0.16
chr1	5926631	5926831	chr1.capped.1905	171	+	AT1G17300	0	proximal	UTR5	0.1	1.99	1.14	0.12	0.56	0.85	0	0.82	0
chr1	5929843	5929917	chr1.capped.1906	65	+	AT1G17330	0	proximal	UTR5	5.63	5.32	4.45	8.56	1.83	3.45	13.66	11.47	11.16
chr1	5933800	5934050	chr1.capped.1907	79	+	AT1G17340	0	proximal	UTR5	2.3	2.08	1.67	1.18	1.14	1.62	1.63	2.91	1.48
chr1	5934236	5934284	chr1.capped.1908	42	-	AT1G17340	64	intronic antisense	CDS	0.09	0.47	1.08	0	1.07	0	0.14	0.61	0.55
chr1	5938499	5938555	chr1.noncapped.1909	8	+	AT1G17340	0	distal	UTR3	0	0.23	0.3	0	0	0	1.32	0.69	0.08
chr1	5941745	5941831	chr1.capped.1910	39	+	AT1G17350	0	proximal	UTR5	11.32	6.89	7.68	10.25	3.94	10.62	16.4	13.56	16.48
chr1	5946599	5946791	chr1.capped.1911	128	+	AT1G17360	0	single-exon	UTR5	2.81	4.02	4.2	2.38	1.91	6.54	5.89	6.59	9.32
chr1	5954848	5955041	chr1.capped.1912	30	-	AT1G17370	0	proximal	UTR5	25.17	29.19	19.73	31.1	19.76	20.59	52.38	63.19	85.78
chr1	5957044	5957256	chr1.capped.1913	141	-	AT1G17380	0	proximal	UTR5	40.1	19.35	24.72	51.02	81.35	84.51	30.21	35.18	72.04
chr1	5969905	5969989	chr1.capped.1914	38	-	AT1G17410	0	proximal	UTR5	3.9	7.13	6.44	3.63	5.85	6.42	11.8	14.33	7.26
chr1	5977366	5977485	chr1.capped.1915	44	+	AT1G17420	0	proximal	UTR5	7.77	7.03	10.03	8.41	6.74	22.63	2.34	4.48	5.23
chr1	5981074	5981135	chr1.noncapped.1916	8	+	AT1G17420	0	distal	CDS	1.3	0.7	2.35	0.66	0.37	1.16	0	0.06	0.08
chr1	5981220	5981237	chr1.noncapped.1917	16	+	AT1G17420	0	distal	CDS	0.71	0.56	1.45	1.4	2.13	2.98	0	0.16	0.23
chr1	5981386	5981424	chr1.noncapped.1918	2	+	AT1G17420	0	distal	UTR3	0.43	0.2	0.27	1.96	0.72	1.17	0	0.11	0.08
chr1	5982259	5982315	chr1.capped.1919	7	+	AT1G17430	0	proximal	UTR5	10.47	6.59	5.5	5.99	5.29	12.52	14.92	15.43	21.74
chr1	5987673	5987844	chr1.capped.1920	94	-	AT1G17440	0	proximal	UTR5	6.25	7.8	8.45	7.35	10.48	5.63	10.98	14.56	12.34
chr1	5996813	5996963	chr1.capped.1921	93	-	AT1G17450	0	proximal	UTR5	1.3	0.46	0.22	1.2	0.82	0.61	0.74	0.74	0.08
chr1	5997159	5997357	chr1.capped.1922	172	+	AT1G17455	0	proximal	UTR5	21.41	22.61	14.62	24.57	13.19	20.06	16.05	18.05	17.37
chr1	5998734	5998883	chr1.capped.1923	80	+	AT1G17460	0	proximal	UTR5	1.82	2.17	0.98	0.62	4.23	1.32	3.27	2.2	3.2
chr1	6002883	6003009	chr1.capped.1924	82	+	AT1G17470	0	proximal	UTR5	11.35	10.17	10.6	14.5	9.21	16.05	9.58	11.38	9.59
chr1	6008065	6008403	chr1.capped.1925	212	-	AT1G17480	0	proximal	UTR5	1.53	1.91	1.77	1.83	1.5	1.64	6.14	2.89	6.51
chr1	6008544	6008674	chr1.capped.1926	75	+	AT1G17490	0	proximal	UTR5	29.28	31.53	43.37	36.61	25.32	56.54	73.72	74.07	64.09
chr1	6017932	6018124	chr1.capped.1927	130	+	AT1G17500	0	proximal	UTR5	1.84	2.07	1.23	1.55	2.25	3.71	1.71	1.75	1.41
chr1	6024218	6024344	chr1.capped.1928	42	-	AT1G17510	0	proximal	UTR5	20.2	22.63	17.1	27.16	17.85	15.62	40.26	28.14	30.4
chr1	6027335	6027474	chr1.capped.1929	49	-	AT1G17520	0	proximal	UTR5	6.3	8.69	6.58	10.01	6.07	7.02	16.25	21.98	25.97
chr1	6027576	6027686	chr1.capped.1930	83	+	AT1G17530	0	proximal	UTR5	14.32	17	22.21	19.46	18.56	21.23	36.34	47.39	46.3
chr1	6029553	6029590	chr1.noncapped.1931	11	-	AT1G17540	0	distal	CDS	0.04	0.81	0.58	0.1	0	0.23	0	0	0
chr1	6032737	6032811	chr1.capped.1932	68	-	AT1G17540	0	proximal	UTR5	0.89	6.26	1.44	0.43	1.5	0.85	0	1.31	0.08
chr1	6034197	6034458	chr1.capped.1933	164	+	AT1G17550	0	proximal	UTR5	4.64	5.64	5.82	5.31	5.02	7.67	9.75	11.45	15.46
chr1	6038583	6038700	chr1.capped.1934	85	-	AT1G17560	0	proximal	UTR5	13.73	13.13	14.69	15.01	7.29	10.52	16.61	13.08	15.05
chr1	6039228	6039317	chr1.capped.1935	15	+	AT1G17580	-6	upstream	UTR5	1.82	1.7	0.8	1.74	1.08	1.48	3.26	2.48	2.35
chr1	6047654	6047709	chr1.capped.1936	32	+	AT1G17580	0	distal	CDS	0.26	0.18	0.38	0.22	0.21	0.27	1.73	0.61	0.9
chr1	6052405	6052608	chr1.capped.1937	140	-	AT1G17590	0	proximal	UTR5	2.51	2.1	1.78	5.11	4.67	1.68	3.97	2.78	2.44
chr1	6056781	6056918	chr1.capped.1938	115	+	AT1G17610	0	proximal	UTR5	0.09	0.19	0.1	0.05	0	0.42	0.59	0.34	1.1
chr1	6062176	6062313	chr1.capped.1939	78	+	AT1G17620	0	single-exon	UTR5	6.73	8.95	10.44	10.37	3.5	10.61	9.82	17.01	20.11
chr1	6064483	6064597	chr1.capped.1940	69	+	AT1G17630	0	proximal	CDS	0.26	0.24	0.27	0.23	0	0.07	1.18	0.26	0.55
chr1	6069239	6069369	chr1.capped.1941	87	-	AT1G17640	0	proximal	UTR5	2.4	1.7	1.39	2.22	1.92	0.83	4.71	4.01	4.23
chr1	6071917	6072078	chr1.capped.1942	32	-	AT1G17650	0	proximal	CDS	10.38	12.53	11.41	10.09	6.68	9.58	20.81	16.43	15.32
chr1	6074419	6074563	chr1.capped.1943	82	-	AT1G17665	0	proximal	UTR5	0.62	0.82	0	0.98	0	0.17	0.79	0.43	0.4
chr1	6076015	6076018	chr1.noncapped.1945	2	-	AT1G17670	0	single-exon	NC	15.09	6.98	0	16.98	0	6.66	1.04	0	0
chr1	6076073	6076143	chr1.capped.1944	59	+	AT1G17680	0	proximal	UTR5	3.58	3.2	2.72	2.69	1.37	4.27	5.97	4.73	6.16
chr1	6088267	6088358	chr1.capped.1946	72	-	AT1G17690	0	proximal	UTR5	4.01	4.48	4.6	2.83	3.59	4.36	8	5.73	6.48
chr1	6089428	6089657	chr1.capped.1947	85	+	AT1G17700	0	single-exon	UTR5	0.62	0.35	1.01	1.11	1.41	1.81	0.24	1.12	8.82
chr1	6091951	6092118	chr1.capped.1948	75	-	AT1G17710	0	proximal	UTR5	0.49	2.35	5.17	0.28	4.52	1.27	1.33	3.58	3.67
chr1	6098222	6098251	chr1.capped.1949	13	-	AT1G17720	0	proximal	UTR5	1.61	1.66	0.95	3.29	0.71	2.16	0.83	0.8	1.64
chr1	6098275	6098457	chr1.capped.1950	54	-	AT1G17720	0	proximal	UTR5	38.41	45.06	31.97	57.28	46.4	48.61	38.73	45.89	52.98
chr1	6099040	6099153	chr1.capped.1951	74	+	AT1G17730	0	proximal	UTR5	15.59	15.14	19.8	14.04	10.08	26.12	39.35	39.94	48.42
chr1	6101049	6101175	chr1.capped.1952	69	+	AT1G17745	0	single-exon	UTR5	27.96	20.14	15.42	31.38	12.31	29.77	56.15	51.12	160.19
chr1	6106321	6106532	chr1.capped.1953	38	+	AT1G17750	0	single-exon	UTR5	2.04	0.61	0.35	0.73	0.83	0.69	1.46	1.37	1.89
chr1	6116514	6116617	chr1.capped.1954	102	-	AT1G17760	0	proximal	UTR5	5.28	6.8	3.59	5.98	5.24	4.18	11.64	10.2	8.74
chr1	6123583	6123786	chr1.capped.1955	73	+	AT1G17780	0	proximal	UTR5	2.99	2.95	3.22	4.48	2.43	4.71	4.7	10.23	6.25
chr1	6127402	6127530	chr1.capped.1956	68	-	AT1G17790	0	proximal	UTR5	2.18	3.09	3.93	2.67	1.52	4.37	8.56	9.38	6.94
chr1	6131851	6131916	chr1.capped.1957	32	-	AT1G17820	0	distal	CDS	0.2	0.24	0.29	1.81	2.73	2.4	0	0	0.4
chr1	6135124	6135367	chr1.capped.1958	164	-	AT1G17820	0	proximal	UTR5	3.6	4.48	4.68	2.79	2.68	2.65	4.81	6.13	3.53
chr1	6138250	6138458	chr1.capped.1959	60	-	AT1G17830	0	proximal	UTR5	0.96	3.87	3.09	1.94	2.19	4.18	2.64	4.6	3.13
chr1	6142462	6142569	chr1.capped.1961	37	-	AT1G05337	0	single-exon	NC	0.07	0.11	0.16	0.19	0.47	0.66	0.62	0.82	0.08
chr1	6142468	6142671	chr1.capped.1960	95	+	AT1G17840	0	proximal	UTR5	31.25	28.33	15.79	45.46	15.54	32.24	42.08	56.1	54.83
chr1	6142739	6142780	chr1.capped.1962	3	+	AT1G17840	0	proximal	UTR5	3.74	4.68	3.94	3.22	1.76	2.64	16.77	19.98	12.08
chr1	6148789	6148852	chr1.capped.1963	41	-	AT1G17850	0	proximal	UTR5	4.18	5.73	2.63	4.64	1.22	1.69	5.21	7.31	7.49
chr1	6149252	6149422	chr1.capped.1964	48	+	AT1G17860	0	single-exon	UTR5	1.84	2.94	3.06	0.95	2.03	7.22	6.55	4.61	10.14
chr1	6152217	6152289	chr1.capped.1965	64	-	AT1G17870	-60	upstream	UTR5	0.05	0.2	0.43	0.22	0	0.13	1.01	0.68	0.16
chr1	6153933	6153983	chr1.capped.1966	19	-	AT1G17880	0	proximal	UTR5	201.36	185.25	209.4	248.03	161.52	207.65	318.05	281.32	278.02
chr1	6154488	6154516	chr1.noncapped.1967	27	-	AT1G17890	0	single-exon	CDS	2.14	1.86	0.77	0.28	0.56	0.26	0.15	0	0.4
chr1	6154826	6154892	chr1.noncapped.1968	3	-	AT1G17890	0	single-exon	CDS	0.2	1.03	0.94	0.29	0.16	0.5	0.12	0.33	0
chr1	6155613	6155761	chr1.capped.1969	136	-	AT1G17890	0	single-exon	UTR5	15.09	16.78	20.78	17.58	8.22	13.36	17.75	18.02	18.64
chr1	6165279	6165466	chr1.capped.1970	66	-	AT1G17920	0	proximal	UTR5	1.13	1.51	0.58	0.88	0	0.72	1.09	1.14	0.4
chr1	6165484	6165742	chr1.capped.1971	67	-	AT1G17920	0	proximal	UTR5	1.59	2.05	1.6	2.27	1.25	1.33	1.45	2.36	1.95
chr1	6168744	6168880	chr1.capped.1972	91	-	AT1G17930	0	proximal	UTR5	3.97	4.25	4.72	4.28	3.44	3.94	7.99	5.78	9.07
chr1	6172046	6172246	chr1.capped.1973	116	-	AT1G17940	0	proximal	UTR5	0.54	0.13	0.41	1.47	0	0.09	2.29	1.33	2.11
chr1	6172464	6172710	chr1.capped.1974	131	-	AT1G17940	0	proximal	UTR5	1.62	1.1	0.72	2.12	0	0.91	2.38	1.42	2.35
chr1	6173097	6173338	chr1.capped.1975	125	-	AT1G17940	0	proximal	UTR5	2.57	1.86	1.44	4.36	1.53	1.85	2.43	3.7	2.98
chr1	6173532	6173614	chr1.noncapped.1976	56	-	AT1G17940	-316	upstream	UTR5	1.13	0.04	0.11	2.03	0.99	1.19	0.33	0.8	0.4
chr1	6177556	6177630	chr1.capped.1977	60	+	AT1G17950	0	proximal	UTR5	0.7	0.87	0.55	1.1	0.54	2.26	2.65	1.45	0.6
chr1	6177709	6177795	chr1.capped.1978	25	+	AT1G17950	0	proximal	UTR5	0.25	0.2	0.28	0.08	0	0.33	0.7	0.94	0.87
chr1	6181120	6181241	chr1.capped.1979	37	-	AT1G17960	-36	intron	CDS	0.31	0.7	0.2	0.33	0.32	0	1.93	0.89	0.08
chr1	6183672	6183810	chr1.capped.1980	137	-	AT1G17960	-4	upstream	UTR5	0.42	0.26	0.28	0.42	0.31	0.04	0.27	0.6	0.56
chr1	6184902	6184998	chr1.capped.1981	15	+	AT1G17970	0	proximal	UTR5	1.66	2.74	1.37	4.11	1.43	1.08	0.92	0.8	1.58
chr1	6185560	6185682	chr1.capped.1982	45	-	AT1G17970	2	intronic antisense	CDS	0.46	0.37	0.67	0	0	0.74	0.5	0.56	1.1
chr1	6191612	6191720	chr1.capped.1983	67	-	AT1G17980	0	proximal	UTR5	27.51	30.93	18.86	36.35	29.51	16.97	38.04	38.54	28.78
chr1	6193571	6193689	chr1.capped.1984	117	-	AT1G17990	0	proximal	CDS	0.61	1.08	2	0.08	0.73	0.53	0.57	1	0.82
chr1	6193859	6193979	chr1.capped.1985	76	-	AT1G17990	0	proximal	UTR5	0.19	0.15	0.29	0.07	0.83	0.12	0.49	0.63	0.32
chr1	6194875	6194904	chr1.capped.1986	15	+	AT1G18000	0	antisense	CDS	1.25	1.48	2.33	1.47	1.09	1.79	0.97	0.71	1.76
chr1	6195733	6195746	chr1.noncapped.1987	4	+	AT1G18000	0	antisense	CDS	2.19	0.96	1.91	3.45	1.07	2.23	1.66	0.75	0.08
chr1	6196018	6196052	chr1.capped.1988	28	-	AT1G18000	0	single-exon	CDS	0.21	0.32	0.75	0.25	0.73	1.52	0.7	0.79	0.4
chr1	6196091	6196323	chr1.capped.1989	63	-	AT1G18000	0	single-exon	UTR5	11.87	15.23	17.21	3.46	9.46	6.63	10.17	18	6.63
chr1	6199741	6199988	chr1.capped.1990	130	+	AT1G18010	0	single-exon	UTR5	4.81	0.33	3.25	20.86	4.21	8.47	6.59	4.06	7.15
chr1	6201125	6201136	chr1.capped.1991	7	-	AT1G18010	0	antisense	CDS	1.72	2.31	1.56	1.25	1.44	0.3	1.49	1.7	1.68
chr1	6202229	6202403	chr1.noncapped.1992	108	+	AT1G18020	0	proximal	CDS	0.83	0.82	1.96	0.93	0.71	5.08	1.12	0.9	1.18
chr1	6204314	6204409	chr1.capped.1993	32	+	AT1G18030	0	proximal	UTR5	0.06	0	0	0	0	22.09	0.85	6.76	0
chr1	6209346	6209570	chr1.capped.1994	153	-	AT1G18040	0	proximal	UTR5	5.83	4.91	4.22	6.41	4.89	1.87	10.63	9	11.32
chr1	6213310	6213521	chr1.capped.1995	42	-	AT1G18060	0	proximal	UTR5	41.88	44.72	44.11	57.63	42.57	60.89	116.88	92.15	139.44
chr1	6218227	6218392	chr1.capped.1996	91	-	AT1G18070	0	proximal	UTR5	23.77	32.83	32.26	23.52	18.5	26.83	58.34	55.13	36.4
[truncated: 26,238 more rows]

## Sheet: Flower part expression
Supplemental Data S2: 5' end features identified by EndGraph in floral bud RNA from Arabidopsis thaliana
Features were taken from the "Unified 5P Feature Set" and quantified in whole stage 13 flowers and in five flower tissue types as reads per million genome-matching reads (RPM).
feature name	associated gene ID (Araport11)	whole_flower_1	whole_flower_2	whole_flower_3	sepal_1	sepal_2	sepal_3	petal_1	petal_2	petal_3	anther_1	anther_2	anther_3	stigma_1	stigma_2	stigma_3	ovule_1	ovule_2	ovule_3
chr1.capped.0	AT1G01010	1.43	1.21	0.31	0.3	0.46	0.6	0.32	0.1	0.08	0.55	0.35	0.07	1.68	1.42	3.98	3.6	0.8	1.08
chr1.capped.1	AT1G01020	2.79	2.84	3.3	4.27	3.38	1.53	6.35	5.5	5.21	1.98	2.94	2.4	2.72	1.65	1.41	4.25	3.58	3.94
chr1.capped.100	AT1G01840	1.98	1.4	1.08	0.3	0.74	0.29	1.65	1.1	1.3	0.77	0.42	0.58	0.52	0.88	0.87	3.44	2.25	3.1
chr1.capped.1000	AT1G09280	4.63	2.99	2.67	3.62	4.61	3.05	5.8	3.2	2.91	1.87	1.75	1.39	4.14	5.92	4.52	13.92	5.6	13.1
chr1.capped.1002	AT1G09300	1.43	1.16	1.32	2.01	2.31	1.18	1.49	1	1.46	0.44	0.35	0.59	2.97	5.33	4.52	5.24	1.99	3.59
chr1.capped.1003	AT1G09290	4.11	3.24	2.23	2.72	2.67	2.04	2.82	2	2.28	1.1	1.48	0.88	4.77	4.79	5.66	7.95	4.55	9.04
chr1.capped.1004	AT1G09310	0.09	0.14	0.16	0	0	0	0	0	0	0	0	0	0	0	0	0.04	0	0
chr1.capped.1005	AT1G09310	142.54	128.5	101	11.02	13.41	9.76	1.57	2.41	6.34	22.6	7.36	11.25	20.06	20.24	35.31	58.29	23.78	65.1
chr1.capped.1006	AT1G09320	3.57	2.9	2.23	1.71	2.01	1.32	4.08	2.61	2.53	2.63	2.25	2.13	2.84	2.45	2.83	5.43	3.86	8.32
chr1.capped.1007	AT1G09330	39.64	31.47	42.13	18.38	20.56	14.87	37.02	32.11	39.65	46.58	51.66	42.01	36.2	35.52	54.32	40.81	24	28.78
chr1.capped.1008	AT1G09340	18.48	18.86	22.47	78.08	91.67	37.55	6.52	6.8	8.1	3.74	3.64	2.68	9.82	6.65	6.07	9.35	4.22	10.34
chr1.capped.1009	AT1G09370	0.18	0.34	0	0	0	0.02	0	0	0	0	0	0.07	0	0	0	0.06	0.13	0.12
chr1.capped.101	AT1G01870	0.27	0	0.24	0	0	0.08	0	0	0	0	0	0	0.04	0	0	0	0.16	0.36
chr1.capped.1013	AT1G09380	0.09	0.14	0.86	0	0	0	0	0	0	0.55	2.59	1.37	0	0	0	0.25	0	0
chr1.capped.1015	AT1G09380	2.22	3.43	23.41	0	0	0.02	0.41	0	0.25	13.44	102.97	48.63	0	0	0	0.38	0.13	0.12
chr1.capped.1016	AT1G09390	8.47	9.16	9.93	7.14	9.18	3.82	23.38	17.94	21.25	4.93	4.15	4.18	5.03	2.45	1.98	16.87	5.87	6.44
chr1.capped.1017	AT1G09415	4.4	3.89	4.95	9.85	12.78	9.37	5.37	6.21	5.08	3.3	3.87	2.89	5.32	4.31	2.66	4.42	4.67	4.79
chr1.capped.1018	AT1G09420	1.26	0.95	1.08	1.9	1.76	2.37	3.75	3	2.53	0.11	0.56	0.49	0.65	0.44	0	3.05	1.05	2.63
chr1.capped.1019	AT1G09430	16.11	14.58	17.48	41.52	49.83	38.9	60.79	37.82	34.53	10.4	11.98	9.79	17.66	18.87	22.93	16.89	8.95	18.21
chr1.capped.102	AT1G01860	1.65	1.68	1.31	4.13	4.38	2.46	1.57	1	1.39	1.1	0.85	0.79	1.93	1.89	2.54	3.06	3.87	2.99
chr1.capped.1020	AT1G09440	2.33	2.98	1.47	0.9	2.42	1.34	3.49	4	4.4	0.16	0.35	0.58	0.13	0.11	0.14	6.63	2.93	4.4
chr1.capped.1021	AT1G09440	1.62	0.74	1.7	2.62	2.28	1.1	1.48	1.1	1.61	1.21	0.21	0.64	0	0	0.14	0.55	0.78	0.84
chr1.capped.1022	AT1G09450	1.35	0.74	0.39	0.15	0.07	0.13	0.08	0.1	0.16	0	0.07	0	0.26	0.95	0.42	5.05	1.43	1.92
chr1.capped.1023	AT1G09460	11.92	12.3	12.79	10.92	10.27	8.6	78.07	50.35	42.49	11.42	12.84	6.73	6.58	8.45	8.03	30.49	6.89	14.48
chr1.capped.1024	AT1G09470	1.25	0.74	0.55	0.1	0.47	0.08	0.42	0.5	0.66	0	0	0.35	0	0	0	0.57	0.81	0.48
chr1.capped.1025	AT1G09470	1.26	1.92	0.69	1.21	1.35	0.36	0.83	1.5	0.97	0.11	0.77	0.42	0	0.22	0.14	2.85	2.38	2.16
chr1.capped.1026	AT1G09470	0.18	0.15	0.16	0	0	0	0	0.1	0.08	0	0	0.02	0	0	0.28	0.41	0.13	0.12
chr1.capped.1027	AT1G09480	1.08	0.74	1.16	0.4	0.6	0.28	6.46	6.31	2.71	0.44	0.49	0.07	0.39	0.11	0.14	0.23	0.52	0.6
chr1.capped.1029	.	2.92	3.18	3.64	2.23	2.72	1.36	5.47	5.58	5.79	3.27	1.92	1.87	3.41	4.36	6.36	3.89	1.92	2.74
chr1.capped.103	AT1G01880	0.9	1.33	1.01	0.6	1.27	0.64	0.9	1	0.65	2.31	0.91	1.39	0.91	0.88	2.11	3.81	1.59	2.03
chr1.capped.1030	AT1G09490	8.81	8.76	8.99	14.25	21.17	14.8	11.6	8.82	13.16	3.38	3.24	3.38	4.12	5.47	2.69	18.27	7.51	13.79
chr1.capped.1031	AT1G09500	0.71	0.95	1.38	9.69	10.91	4.79	0.08	0	0.08	0.33	0	0.35	0.39	0	0.28	1.08	0.26	0.72
chr1.capped.1032	AT1G09520	7.59	5.45	6.01	3.32	5.83	4.02	10.86	6.82	5.83	3.39	2.9	1.55	7.86	7.94	10.07	29.63	11.94	16.19
chr1.capped.1033	AT1G09530	1.88	1.7	1.1	0.9	0.76	0.74	1.56	2.6	2.02	0.55	0.28	0.28	3.11	1.99	1.12	5.17	1.44	5.85
chr1.capped.1034	AT1G09560	27.92	31.35	16.85	13.33	15.06	16.43	18.93	22.06	26.82	8.54	4.88	6.41	27.16	28.6	29.47	191.08	27.87	20.46
chr1.capped.1035	AT1G09570	3.49	2.88	1.93	2	1.36	1.39	2.8	2.5	3.26	2.09	1.26	0.8	5.3	5.01	2.11	5.08	2.12	4.53
chr1.capped.1036	AT1G09570	1.08	1.01	0.93	1.3	1.29	1.74	3.79	3.71	2.21	0.77	0.56	0.42	0.65	1.1	0.56	1.03	0.26	0.72
chr1.capped.1037	AT1G09570	4.65	2.92	4.24	7.93	5.7	6.2	20.23	21.05	11.4	3.62	3.65	2.04	6.98	6.91	7.43	1.56	1.05	5.37
chr1.capped.1038	AT1G09575	3.74	2.37	5.03	1.3	1.32	1.01	4.72	4.01	6.07	2.42	1.62	1.24	2.32	3.46	6.37	2.82	2.4	1.78
chr1.capped.1039	AT1G09575	2.23	1.21	2.42	0.8	0.88	0.72	2.06	2.8	5.22	1.87	2.03	1.23	1.56	1.55	1.41	1.34	1.04	0.84
chr1.capped.104	AT1G01880	0.27	0.07	0.61	0	0	0	0.5	0.7	0.73	0.11	0	0.21	0	0	0	0	0	0
chr1.capped.1040	AT1G09575	3.84	1.23	1	0	0	0	0.16	0.1	0	5.05	9.3	7.88	0	0	0	0.02	0	0
chr1.capped.1041	AT1G09580	24.08	15.44	16.24	3.33	4.83	2.62	8.97	8.23	12.83	26.6	38.47	36.53	11.06	10.83	14.58	12.2	6.57	6.8
chr1.capped.1042	AT1G09590	250.44	205.16	192.54	88.96	85.48	51.64	131.4	146.89	189.21	96.07	69.18	94.58	173.66	143.02	179.23	413.11	207.02	251.77
chr1.capped.1043	AT1G09600	7.52	8.09	11.86	0.2	0.14	0.28	23.02	15.22	17.06	20.82	24.04	13.59	7.12	3.55	5.2	3.15	1.43	0.6
chr1.capped.1044	AT1G09610	3.02	0.34	5.71	0.51	0.93	0.36	2.65	1.1	2.46	3.17	0.49	0.88	0.9	0.11	0.14	0.15	0	0.12
chr1.capped.1045	AT1G09620	14.44	14.11	12.45	8.98	10.02	9.38	21.85	16.25	17.65	6.26	5.57	7.66	16.74	14.07	17.35	36.74	20.07	30.9
chr1.capped.1046	AT1G09640	25.02	26.79	20.02	15.02	17.3	15.21	37.41	20.66	24.97	17.18	13.18	11.88	27.16	23.14	24.09	70.77	21.23	41.97
chr1.capped.1047	AT1G09630	12.39	12.97	12.68	7.75	8.41	7.57	14.7	14.43	15.86	9.42	8.03	6.39	14.31	12.04	19.82	27.19	14.6	18.1
chr1.capped.1048	AT1G09645	21.93	18.94	23	26.53	34.61	23.98	36.21	29.1	30.75	16.84	14.79	10.86	28.58	31.9	48.33	26.75	24.12	29.73
chr1.capped.1049	AT1G09650	0.93	0.5	0.71	0.3	0.07	0.3	0.32	1.03	0.75	0.22	0.14	0.44	0.65	0.88	0.84	1.27	0.79	1.32
chr1.capped.105	AT1G01900	1.35	2.04	2.78	0.7	1.41	0.71	4.73	2.4	4.81	1.98	0.77	0.73	2.84	0.66	2.25	0.61	0.39	0.84
chr1.capped.1050	AT1G09650	0.71	0.74	0.54	0.4	0.21	0.09	1.08	1	1.47	0	0	0	0.78	1.34	0.28	1.03	1.75	2.62
chr1.capped.1051	AT1G09650	0.27	0.14	0.24	0.1	0.07	0.02	0.24	0	0	0.33	0	0.07	0.13	0.22	0.28	0.31	0.13	0.36
chr1.capped.1052	AT1G09650	0.27	0.2	0.08	0	0.28	0.06	0.16	0.2	0.24	0.11	0.07	0	0	0.33	0	0.61	0.27	0.12
chr1.capped.1053	AT1G09660	0.35	0.2	0.4	0.2	0	0.15	0.12	0.03	0.33	0.16	0.14	0.52	0.38	0.22	0.28	0.04	0.36	0.42
chr1.capped.1054	AT1G09660	9.92	8.55	7.45	5.94	5.31	3.48	10.13	9.62	9.31	3.95	4.5	4.15	10.79	10.96	10.88	21.83	8.67	10.51
chr1.capped.1055	AT1G09680	0.36	0.48	0.16	1.1	0.34	0.39	0.49	0.2	0.24	0.22	0.07	0.14	0.91	1.1	1.55	1.5	0.13	0.72
chr1.capped.1056	AT1G09690	301.7	243.06	227.54	111.03	116.37	73.37	143.79	163.95	220.37	128.44	91.65	112.67	232.42	201.29	234.9	646.75	310.39	344.42
chr1.capped.1057	AT1G09700	6.8	6.2	6.51	3.61	2.85	1.8	6.81	5.52	5.57	1.89	2.03	1.99	8.64	8.3	12.45	14.62	6.3	8.96
chr1.capped.1058	AT1G09710	2.15	1.82	1.48	0.6	2	1.45	1.15	0.6	0.57	1.64	1.55	1.47	1.68	0.66	0.14	3.01	0.92	3.1
chr1.capped.106	AT1G01920	5.19	4.64	5.07	2.52	3.11	2.13	7.11	5.1	5.78	2.41	2.74	1.38	7.49	7.7	10.9	14.1	7.33	10.39
chr1.capped.1060	AT1G09730	6.08	5.1	4	5.03	5.23	3.66	8.3	4	4.76	3.72	2.88	3.18	5.54	6.59	7.21	7.94	3.62	10.01
chr1.capped.1061	AT1G09740	0.46	0.47	0.76	2.31	2.09	2.25	0	0	0.16	0.22	0.79	0.59	0.13	0	0	0.52	0.4	0.6
chr1.capped.1062	AT1G09750	6.59	9.63	5.63	8.68	10.88	2.89	4.14	9.54	6.35	1.42	0.71	1.83	1.8	1.33	1.27	18.24	4.07	10.71
chr1.capped.1063	AT1G09760	12.57	12.56	10.2	7.65	10.2	5.9	13.03	8.92	9.61	5.49	4.3	4.47	12.22	11.25	11.49	31.72	13.01	21.98
chr1.capped.1064	AT1G09770	15.88	15.74	11.44	10.28	12.46	10.35	21.32	14.73	15.03	9.21	11.57	9.35	19.21	21.55	17.13	38.31	17.42	32.71
chr1.capped.1066	AT1G09780	24.74	23.44	20.99	18.89	19.52	14.48	25.83	18.08	38.74	19.56	15.07	20.82	33.8	22.48	35.52	24.16	8.18	11.68
chr1.capped.1067	AT1G09790	2.79	0.42	1.63	0.1	0.41	0.2	0.9	0.1	0	3.42	0.49	1.51	0	0	0	0.93	0.39	0.96
chr1.capped.1068	AT1G09794	6.64	7.87	7.83	7.86	8.48	5.73	8.12	10.1	8.59	9.43	7.97	7.65	13.88	17.3	17.25	7.25	6.67	9.16
chr1.capped.1069	AT1G09795	26.43	19.58	20.29	29.22	34.3	17.56	29.65	26.72	30.82	12.56	13.23	12.87	17.76	17.35	17.3	35.84	13.02	20.2
chr1.capped.107	AT1G01910	18.34	15.13	13.47	21.32	23.77	13.22	23.25	14.66	19.44	9.29	10.96	11.87	18.92	27.62	36.44	30.33	11.95	17.47
chr1.capped.1070	AT1G09800	1.17	1.21	0.86	0.1	0.27	0.27	0.08	0.8	0.32	0	0.28	0.22	1.04	1.33	1.54	4.54	1.59	1.32
chr1.capped.1073	AT1G09810	3.75	5.1	3.22	3.81	2.34	2.39	4.54	2.4	2.38	1.98	1.61	2.43	3.37	2.44	2.82	6.23	4.97	6.32
chr1.capped.1074	AT1G09812	0.72	0.87	0.62	0.2	0.27	0.41	0.33	0.47	0.33	0.22	0.42	0.35	0	0.34	0.14	1.05	0.26	1.31
chr1.capped.1075	AT1G09815	22.53	17.21	15.61	26.96	21.5	17.98	10.37	10.08	10.77	13.44	13.14	10.83	20.09	19.31	24.79	34.25	21.32	24.1
chr1.capped.1076	AT1G09820	1.17	1.22	0.77	0.9	0.82	0.16	0.81	1.4	1.13	0.44	0.14	0.58	1.42	1.32	1.97	1.98	0.66	0.6
chr1.capped.1078	AT1G09830	3.9	2.37	2.32	3.31	3.07	1.58	1.99	1.59	2.02	1.21	1.82	0.66	2.46	3.01	2.38	7.95	2.26	5.47
chr1.capped.108	AT1G01940	12.1	9.47	8.77	15.06	14.64	10.74	8.54	8.63	8.7	5.8	4.8	4.49	8.91	12.64	12.76	27.19	18.37	20.22
chr1.capped.1080	AT1G09840	15.11	11.55	13.07	10.47	8.79	5.44	20.1	12.54	17.73	8.56	5.9	6.92	13.96	13.6	31.11	11.19	9.43	15.12
chr1.capped.1081	AT1G09850	9.79	9.26	9.93	13.13	10.15	6.9	9.76	10.23	11.83	12.02	10.48	10.13	12.64	13.73	18.7	9.43	5.5	8.45
chr1.capped.1082	AT1G09860	0.09	0	0	0.1	0	0	0	0	0.08	0	0	0	0	0	0	0.02	0	0
chr1.capped.1083	AT1G09870	17.92	12.84	12.97	9.06	8.66	4.66	18.58	14.12	18.69	16.1	9.45	12.06	13.43	16.66	26.34	23.92	8.83	15.49
chr1.capped.1084	AT1G09880	0	0	0	0	0	0	0	0	0	0	0	0	0	0	0	0	0.13	0
chr1.capped.1085	AT1G09890	0.63	0.2	0.46	1.31	0.53	0.33	0.99	0.4	0.9	0.22	0.07	0.07	0.52	0	0.28	0.11	0.13	0.48
chr1.capped.1086	AT1G09900	1.78	1.68	1.14	1.81	2.89	1.62	1.34	0.6	0.78	0.11	0.49	0.14	1.69	0.99	0.84	2.45	1.19	3.42
chr1.capped.1088	AT1G09910	3.12	1.68	1	0	0	0.02	0.5	0	0	6.45	2.46	6.22	0	0.11	0	0.02	0.13	0
chr1.capped.1089	AT1G09910	1.43	1.35	1.16	2.7	2.41	1.34	2.3	1.91	2.11	1.32	0.91	0.94	2.6	2.78	4.94	4.45	2.67	4.21
chr1.capped.109	AT1G01930	3.67	3.03	2.97	2.42	2.93	1.95	2.74	2.3	3.02	2.86	4.43	3.01	2.97	4.36	5.37	4.59	2.81	4.19
chr1.capped.1090	AT1G09920	19.82	16.54	19.19	18.17	19.56	17.71	22.15	18.06	20.15	20.3	21.48	16.54	28.46	33.5	39.68	21.36	15.53	22.7
chr1.capped.1091	AT1G09930	1.62	0.48	0.62	0	0	0	0.24	0	0	2.42	1.76	1.99	0.26	0.33	0.14	0.12	0	0
chr1.capped.1092	AT1G09940	11.43	12.83	14.24	4.43	3.97	4.36	7.37	6.32	5.85	26.36	21.44	15.58	4.86	6.38	5.95	5.67	2.81	7.86
chr1.capped.1093	AT1G09960	2.07	1.55	1.08	1.31	1.89	1.63	0.74	1.1	1.05	0.88	0.35	1.08	0.78	0.22	1.69	5.92	1.46	2.98
chr1.capped.1094	AT1G09970	30.25	22.13	26.57	50.13	43.07	21.05	7.71	1.97	5.54	8.88	5.54	5.46	13.4	7.87	7.68	17.88	12.27	25.08
chr1.capped.1095	AT1G09980	7.24	5.22	4.99	3.85	4.47	3.57	8.18	5.81	6.92	6.03	4.48	4.06	4.48	2.38	5.8	4.24	3.34	6.68
chr1.capped.1096	AT1G09995	6.77	6.34	7.6	2.89	3.08	2.45	7.86	4.81	7.17	6.34	4.96	3.68	9.53	10.29	24.1	4.46	2.78	3.23
chr1.capped.1097	AT1G10000	0.45	0.21	0.15	0.7	0.14	0.07	0.4	0.3	0.08	0.22	0	0	0	0.22	0	0.54	0.26	0.24
chr1.capped.1098	AT1G10020	0.18	0.2	0.32	0.3	0	0.11	0.5	1	0.72	0.11	0.07	0.14	0.26	0	0	0.04	0.66	0.48
chr1.capped.1099	AT1G10020	5.54	5.66	7.76	2.1	2.67	3.1	20.17	17.94	17.26	2.75	2.96	2.49	2.32	1.56	3.52	0.44	0.53	1.2
chr1.capped.11	AT1G01080	11.5	10.91	10.21	27.87	30.2	19.35	8.87	8.92	8.12	2.41	2.67	3.21	10.84	9.91	8.08	13.92	12.6	16.66
chr1.capped.110	AT1G01950	6.28	5.66	5.5	1.4	0.81	1.11	3.06	5.8	5.87	2.31	1.4	1.83	4.16	3.57	6.64	3.43	1.83	1.92
chr1.capped.1100	AT1G10020	23.32	24.81	16.38	8.06	8.19	8.49	7.63	8.82	9.09	11.7	6.05	11.12	8.14	12.83	19.7	21.82	31.23	31.78
chr1.capped.1101	AT1G10030	15.28	13.81	15.94	9.65	12.31	6.26	19.75	19.94	20.51	10.41	6.87	5.93	18.82	21.21	29.45	22.82	10.79	14.66
chr1.capped.1102	AT1G10040	0.18	0.62	0.32	0.2	0	0.06	0.32	0.1	0.48	0	0	0.29	0	0.11	0	0.57	0.53	0.6
chr1.capped.1103	AT1G10050	1.35	1.23	1.92	1.5	1.02	1.38	0.57	0.5	0.4	0.55	0.56	0.56	1.17	0.56	2.67	0.56	1.85	2.38
chr1.capped.1105	AT1G10060	45.13	37.29	62.75	53.27	40.61	21.21	250.52	119.01	172.57	27.53	28.07	15.52	120.41	149.48	277.06	4.2	5.49	5
chr1.capped.1106	AT1G10060	1.44	1.21	0.92	0.8	0.34	0.17	2.9	2.5	3.03	0.44	0.56	0.22	9.13	11.27	16.74	0.1	0	0.24
chr1.capped.1107	AT1G10060	0.36	0.47	0.4	0	0	0.1	0.08	1.2	0.56	0.22	0.14	0.49	0.78	0.66	0.28	0	0	0.12
chr1.capped.1108	AT1G10060	0.98	0.54	1.18	1.31	1.28	0.81	0.82	2.5	0.72	1.76	1.33	0.87	0.64	1.01	0.56	0.35	0.13	0.48
chr1.capped.1109	AT1G10070	2.61	3.6	3.99	1.1	0.48	1.05	5.9	5.7	2.92	3.41	10.49	8.82	0.78	1	1.69	0.31	1.05	1.92
chr1.capped.1110	AT1G10070	23.68	22.35	35.43	58.59	54.49	80.76	412.11	259.67	125.82	35.2	81.43	24.95	20.19	57.99	29.05	6.33	10.57	32.34
chr1.capped.1111	AT1G10090	10.99	10.32	15.39	17.25	17.8	9.83	22.47	12.23	25.53	18.82	10.22	6.59	5.83	3.43	22.49	1.93	2.38	3.71
chr1.capped.1112	AT1G10110	0.45	0.41	0.16	0.4	0.2	0.16	0.42	0.4	0.16	0.44	0.28	0.15	0.13	0	0.42	0.56	0.8	0.48
chr1.capped.1113	AT1G10120	6.24	7.74	8.32	2.22	1.6	1.16	8.64	6.53	9.07	4.27	2.47	4.38	1.42	1.56	2.7	7.09	3.88	6.19
chr1.capped.1114	AT1G10120	9.73	6.99	5.57	1.54	2.02	0.9	4.08	3.75	3.52	1.76	0.7	2.19	4.11	2.92	6.13	9.43	3.94	6.57
chr1.capped.1115	AT1G10120	0.36	0.55	0.78	0	0.07	0.02	0.32	0.4	0.4	0.55	0.14	0.42	0.78	0.66	0.56	0.65	0.91	0.96
chr1.capped.1116	AT1G10120	0.36	0.48	0	0	0	0.02	0.08	0	0.08	0	0	0	0.64	0.99	0.14	0.34	0	0.6
chr1.capped.1117	AT1G10130	7.15	3.53	3.37	2.51	3.61	2.26	7.31	4.3	6.63	3.73	2.25	3.08	5.17	5.34	8.63	6.26	2.53	4.89
chr1.capped.1119	AT1G10140	11.98	9.86	15	47.18	39.69	52.89	83.96	69.67	35.7	19.81	23.18	5.17	31.3	38.75	77.53	8.23	18.03	63.3
chr1.capped.112	AT1G01960	3.84	5.82	4.36	2.22	2.36	1.61	5.81	3.7	6.24	1.75	2.18	1.75	4.26	3.24	4.25	6.86	1.71	5.01
chr1.capped.1120	AT1G10150	12.66	7.54	11.42	5.13	6.79	3.94	24.89	16.84	15.28	14.35	14.34	7.28	16.73	17.42	28.47	11.41	5.47	12.38
chr1.capped.1121	AT1G10150	1.52	1.69	2.07	3.84	5.47	2.7	3.49	2.6	1.63	1.65	1.41	1.25	0.52	0.44	0.85	0.16	0	0.12
chr1.capped.1122	AT1G10155	0.09	0.07	0	0	0	0.24	0	0.1	0	0	0	0.15	0	0	0	0	0	0.12
chr1.capped.1123	AT1G10170	3.04	5	3.01	4.34	4.04	4.15	7.31	5.12	3.92	4.9	6.55	4.67	6.84	6.13	5.08	9	5.72	8.18
chr1.capped.1124	AT1G10180	4.65	5.68	3.55	3.21	2.9	1.47	6.13	4.01	4.65	1.54	1.27	1.18	4.65	4.57	5.65	12.73	4.28	7.64
chr1.capped.1125	AT1G10200	53.08	53.5	56.77	42	48.14	25.19	51.02	49.67	68.3	39.37	27.52	28.77	20.74	17.65	15.28	51.13	26.94	42.54
chr1.capped.1126	AT1G10200	2.06	2.76	2.07	1.41	0.76	0.54	0.33	1.2	1.4	0.33	0.56	0.64	0.52	0.56	0.85	0.12	0.66	1.79
chr1.capped.1127	AT1G10210	2.59	3.65	2.84	3.31	4.42	2.01	6.72	4.04	2.85	0.77	2.2	1.25	3.76	3.61	4.28	8.88	2.71	6.52
chr1.capped.1128	AT1G10220	2.06	1.37	1.94	0.6	0.83	1.16	0.99	1.5	1.53	0.99	1.61	1.4	23.46	24.65	50.46	1.75	3.19	2.16
chr1.capped.1129	AT1G10230	17.01	14.89	9.46	4.94	5.75	2.88	8.95	7.62	8.3	7.21	5.42	5.83	11.73	11.4	14.61	32.4	15.98	18.66
chr1.capped.113	AT1G01970	2.68	2.29	1.71	5.03	7.02	3.42	3.96	3.41	2.22	0.44	1.05	1.18	3.49	3	2.97	5.06	2.12	3.7
chr1.capped.1130	AT1G10240	1.61	1.26	0.94	1	1.22	0.56	1.55	0.5	1.05	1.65	0.28	0.83	1.62	1.32	1.7	4.3	1.85	2.39
chr1.capped.1131	AT1G10270	2.41	1.62	0.92	1.41	1.2	0.67	1.65	1.2	0.97	0.22	0.35	1.03	1.68	2.12	4.26	5.36	1.34	2.39
chr1.capped.1132	AT1G10280	3.21	2.84	1.84	0.7	1.47	0.64	1.16	2.2	1.38	5.36	5.84	7.14	3.93	2.68	5.25	1.64	1.46	1.33
chr1.capped.1133	AT1G10290	18.2	11.5	9.1	6.24	7.5	6.05	11.74	8.42	11.31	11.4	12.9	10.82	10.7	9.72	16.44	14.22	7.87	12.99
chr1.capped.1134	AT1G10310	17.33	13.42	12.55	27.27	21.67	13.74	8.87	11.74	10.86	7.88	8.48	6.92	14.51	18.87	22.36	25.2	12.18	19.24
chr1.capped.1136	AT1G10320	5.16	3.36	4.12	5.76	4.61	6.45	5.4	5.41	5.85	3.72	2.89	3.32	4.63	4.71	8.36	5.71	10.07	9.39
chr1.capped.1137	AT1G10330	0.45	1.2	1.09	0.7	0.27	0.43	0.4	0.4	0.24	0.22	0.56	0.07	0.65	0.55	0.98	1.24	0.79	0.36
chr1.capped.1138	AT1G10350	4.97	5.13	5.66	4.02	4.03	2.94	5.48	6.01	6.13	2.74	1.89	2.41	7.78	5.02	8.06	7.69	4.91	4.38
chr1.capped.1139	AT1G10360	15.51	13.64	15.58	21.39	25.13	8.72	7.56	6.71	12.88	9.56	8.11	5.13	4.66	3.11	5.22	4.34	1.99	3.95
chr1.capped.1140	AT1G10370	13.35	13.38	19.02	40.31	42.73	34.11	11.12	9.44	24.35	9.08	5.31	1.6	10.04	5.8	14.89	2.37	1.06	3.82
chr1.capped.1141	AT1G10380	1.97	1.43	1.68	4.72	4.01	3.06	3.15	4.71	3.28	1.87	1.44	2.12	0.13	0.11	0.57	2.41	0.39	1.2
chr1.capped.1142	AT1G10385	3.49	1.88	2.24	0	0.07	0	0.25	0	0	5.82	5.99	6.5	0	0	0	0.1	0	0
chr1.capped.1143	AT1G10390	9.56	6.86	5.41	7.85	7.02	6.21	8.6	7.01	7.45	8.1	4.81	5.81	6.31	6.48	12.02	11.27	4.93	12.76
chr1.capped.1145	AT1G10410	6.83	4.77	6.19	9.35	9.25	4.71	2.88	2.8	3.25	8.43	3.79	3.87	11.36	13.05	42.85	1.38	1.33	2.16
chr1.capped.1146	AT1G10410	16.51	13.02	12.45	7.87	8.04	10.44	9.08	9.51	16.02	16.58	16.18	10.83	36.14	26.55	82.25	2.62	9.97	16.78
chr1.capped.1147	AT1G10417	0.27	0.14	0.08	0	0.07	0.07	0.08	0	0	0	0.14	0.14	0	0	0	0.54	0.52	0.48
chr1.capped.1148	AT1G10430	9.76	6.62	8.03	5.02	5.18	3.22	9.21	8.41	8.77	5.71	6.06	6.15	6.21	6.56	10.04	12.71	6.27	7.28
chr1.capped.1149	AT1G10450	1.07	0.95	0.94	0.9	0.34	0.86	1	0.8	0.64	0.66	0.63	0.67	2.07	1.79	0.99	2.13	1.61	3.34
chr1.capped.1151	AT1G10470	7.42	5.25	3.23	2.24	1.81	1.8	2.65	0.91	0.89	11.29	5.41	6.56	1.93	0.46	1.27	6.24	1.48	1.97
chr1.capped.1152	AT1G10490	1.7	1.61	0.78	0.5	0.21	0.38	0.5	0.7	0.65	0.11	0.28	0.43	1.04	0.66	0.84	4.66	1.45	3.82
chr1.capped.1153	AT1G10510	3.57	2.99	2.75	3.02	5.23	3.08	2.14	2.7	3.1	0.99	1.41	1.75	3.34	2.77	4.11	6.59	2.12	3.92
chr1.capped.1154	AT1G10500	44.6	40.5	52.38	124.83	134.28	84.57	49.23	38.91	45.88	38.15	39.64	33.55	39.29	41.01	56.25	36.1	24.88	33.81
chr1.capped.1155	AT1G10520	0.36	0.07	0.16	0.8	0.34	0.21	0.24	0.4	0.32	0.33	0.77	0.51	0.78	0.33	0.28	0.91	0.65	0.48
chr1.capped.1157	AT1G10522	7.3	7.42	5.72	3.81	4.2	2.02	2.14	3.21	3.95	0.88	0.49	1.38	8.38	6.48	4.79	13.38	5.91	9.99
chr1.capped.1158	AT1G10530	0.27	0.48	0.24	0.9	1.98	1.53	0.16	0.3	0.57	0.44	0.35	0.42	0	0.11	0	0.99	1.05	0.72
chr1.capped.1159	AT1G10540	6.8	6.89	1.71	0.31	0.42	0.29	0.58	0.7	0.96	0.99	1.05	1.16	0	0.33	0.56	16.46	8.49	17.76
chr1.capped.1160	AT1G10560	4.55	3.83	6.1	0.6	0.95	0.33	16.03	8.33	11.51	3.93	3.53	2.57	4.52	4.02	15.15	3.38	0.26	0.72
chr1.capped.1161	AT1G10570	6.65	4.51	4.32	3.82	5.04	3.31	8.35	6.62	7.36	3.85	2.73	3.17	7.25	9.92	10.91	11.25	5.62	10.14
chr1.capped.1162	AT1G10580	11.06	9.78	7.47	6.95	6.97	5.33	8.85	8.01	8.5	9.21	6.76	6.86	6.34	7.8	10.46	15.26	7.19	11.2
chr1.capped.1164	AT1G10590	69.38	63.87	66.73	42.93	49.27	36.55	84.04	65.48	78.06	48.05	44.81	41.71	83.31	92.58	115.87	136.41	69.33	87.21
chr1.capped.1165	AT1G10600	9.55	8.89	9.62	16.85	22.35	15.08	12.11	7.21	6.14	12.58	13.7	8.69	7.87	9.14	9.2	17	6.65	11.93
chr1.capped.1166	AT1G10610	0.91	0.7	0.58	0.7	0.49	0.37	0.35	0.2	0.56	0.22	0.21	0.43	0.13	0.67	0.42	0.21	0	0.38
chr1.capped.1167	AT1G10620	4.66	6.45	7.97	0.2	0.14	0.33	0.4	2.2	0.64	30.99	23.41	15.69	0.13	0	1.82	0.72	0.26	0.48
chr1.capped.1168	AT1G10630	93.26	81.28	85.38	41.64	40.71	24.49	97.11	79.71	97.46	73.54	85.25	75.1	92.85	97.57	143.92	122.35	60.32	73.78
chr1.capped.1169	AT1G10640	12.81	9.68	12.56	0.5	0.6	0.26	19.1	46.81	35.71	0.98	1.97	1.62	0.52	0.78	0.42	10.41	5.78	7.38
chr1.capped.117	AT1G01980	44.16	53	42.18	0	0.28	0.49	0.9	17.86	1.37	235.5	106.28	114.97	0	0.33	18	3.24	0.79	0.36
chr1.capped.1170	AT1G10650	2.14	2.44	3.72	0.6	0.74	0.53	0.32	0.1	0.16	4.81	9.86	3.44	0.13	0	0	0.98	0.13	0.24
chr1.capped.1171	AT1G10650	5.19	7.44	7.99	4.83	4.2	4.66	2.44	1.7	2.36	9.69	11.92	7.61	6.08	5.33	7.48	4.43	3.72	3.48
chr1.capped.1172	AT1G10657	11.78	10.83	9.84	31.43	39.27	12.38	3.4	3.11	6.48	1.09	1.34	0.94	42.44	28.85	12.6	20.02	11.12	13.92
chr1.capped.1173	AT1G10660	18.03	18.66	18.87	11.15	10.91	9.59	4.37	6.6	2.91	55.57	35.73	25.54	8.77	9.7	14.28	17.75	6.25	17.07
chr1.capped.1174	AT1G10670	83.78	70.41	89.79	55.23	63.21	33.86	92.92	62.08	94.89	61.02	104.21	87.27	171.28	204.87	364.91	106.25	37.85	51.27
chr1.capped.1175	AT1G10682	67.73	43.57	57.65	57.63	54.08	43.37	202.74	99.86	86.31	72.49	64.36	43.86	62.75	73.12	106.78	64.11	136	163
chr1.capped.1176	AT1G10690	4.37	4.98	3.61	12.62	11.05	9.34	3.79	4.51	3.09	4.93	4.49	3.22	22.56	22.08	14.3	2.8	3.45	12.51
chr1.capped.1177	AT1G10700	5.61	4.5	6.09	14.05	11.23	8.13	10.62	6.82	6.5	3.61	2.75	2.72	14.92	12.74	20.27	6.04	5.23	14.61
chr1.capped.1178	AT1G10700	6.15	2.49	2.45	0.23	0.07	0.04	0.4	0.4	0.08	16.3	11.4	9.54	0	0.11	0.28	0.42	0.27	0
chr1.capped.1179	AT1G10710	0.72	0.48	0.47	0.2	0.2	0.41	0.24	0.3	0.74	0.11	0.21	0.29	0	0.11	0	0.47	0.4	0.36
chr1.capped.118	AT1G01990	11.59	8.67	8.4	22.13	23.92	14.56	15.29	10.75	10.58	9.42	6.14	4.59	13.38	12.95	16.44	22.1	13.68	24.5
chr1.capped.1180	AT1G10720	12.12	10	11.36	11.78	12.52	8.37	11.7	10.52	12.62	12.7	11.79	10.64	10.21	12.39	18.4	10.95	8	7.53
chr1.capped.1181	AT1G10730	4.02	3.36	2.67	4.33	4.48	2.58	4.15	2.3	3.12	3.83	3.1	3.77	4.89	5.59	8.07	4.56	2.39	4.64
chr1.capped.1182	AT1G10740	35.8	38.35	42.27	11.08	10.37	10.01	16.95	24.26	15.5	130.99	97.5	60.06	9.43	10.37	30.53	7.83	3.58	5.38
chr1.capped.1183	AT1G10747	0.54	0.17	0.69	0.1	0	0	0.51	0.11	0.08	0.55	0.28	0.61	0	0	0	0	0.13	0
chr1.capped.1184	AT1G10750	0.9	0.82	0.47	0.1	0	0.09	0	0	0.16	0	0	0.07	0	0	0.14	1.53	0	0.84
chr1.capped.1185	AT1G10760	6.7	7.89	5.57	22.52	25.09	15.36	6.22	5.4	6.28	5.83	1.96	3.53	8.13	4.12	5.36	13.49	4	10.19
chr1.capped.1186	AT1G10770	880.71	938.14	1081.58	17.51	16.14	20.91	11.39	215.05	16.13	3268.07	2771.3	2316.62	1.81	17.34	195.55	63.97	1.48	2.27
chr1.capped.1187	AT1G10780	2.72	1.7	1.08	0.1	0.27	0.3	0.58	0.7	0.41	0.33	0.42	0.51	0.39	0.79	0.85	5.51	1.86	1.8
chr1.capped.1188	AT1G10800	0.45	0.54	0.61	0.5	0.4	0.25	1.31	0.8	1.14	0.33	0.14	0.21	0.26	0	0.14	0.04	0	0
chr1.capped.1189	AT1G10820	2.07	2.54	2.84	2.92	3.09	2.41	4.85	4	5.61	1.75	1.19	1.23	2.08	2.99	3.57	10.92	4.13	6.28
chr1.capped.119	AT1G02000	44.99	70.27	52.77	10.38	9.44	8.44	8.33	23.47	8.65	218.18	154.47	113.29	6.98	7.22	28.47	15.53	5.06	5.4
chr1.capped.1190	AT1G10830	5.71	6.34	5.35	15.02	16.05	11.03	7.86	6.11	8.76	3.84	3.74	2.58	4.4	3.89	5.51	6.82	2.27	5
chr1.capped.1191	AT1G10840	41.95	30.42	35.26	24.53	25.65	21.42	36.81	31.5	32.31	20.46	16.16	17.44	31.82	39.99	40.26	78.12	38.92	66.71
chr1.capped.1192	AT1G10850	8.24	3.81	3.55	0.6	0.07	0.23	3.29	4	6.24	1.65	1.47	1.94	0.78	1.65	1.54	9.13	3.16	7.47
chr1.capped.1193	AT1G10850	1.08	0.55	0.46	0	0	0	0.16	0.2	0.57	0.55	0.35	0.07	0.13	0.11	0.14	1.01	0.39	0.72
chr1.capped.1194	AT1G10865	29.04	26.22	32.56	54.46	50.09	37.99	26.88	20.98	23.27	33.57	25.9	23.56	43.37	50.06	73.15	27.84	22.39	28.89
chr1.capped.1195	AT1G10870	4.57	3.71	5.38	3.12	2.82	1.12	6.29	6.41	8.17	2.86	3.3	4.65	6.34	3.33	7.49	4.67	2	3.93
chr1.capped.1196	AT1G10890	17.3	15.28	14.1	12.71	15.88	11.78	15.59	12.64	12.14	14.1	12.51	10.17	17.51	20.54	27.47	30.05	11.39	24.03
chr1.capped.1197	AT1G10900	1.26	1.5	1.48	2.91	4.23	2.12	1.46	0.9	1.87	1.1	0.77	0.5	0.26	0.11	0.84	1.94	1.58	0.6
chr1.capped.1198	AT1G10910	4.38	2.51	3.37	5.44	5.51	3.36	6.73	5.2	4.25	1.65	1.89	1.1	5.56	6.67	5.23	8.96	4.27	10.12
chr1.capped.12	AT1G01090	44.88	64.16	56.56	19.39	24.84	22.44	164.7	138.44	142.01	43.16	50.72	48.45	91.58	86.3	94.43	32.84	18.66	35.67
chr1.capped.120	AT1G02010	11.42	10.03	9.06	1.51	1.36	0.82	2.09	2.6	1.54	31.04	36.93	31.87	1.55	2.01	2.68	3.69	0.78	1.48
chr1.capped.1200	AT1G10920	1.08	1.3	0.78	3.79	3.76	2.02	1.65	0.4	0.48	0.22	0.35	0.14	1.3	0.72	1.27	2.26	2.26	2.5
chr1.capped.1201	AT1G10930	1.88	1.4	1.24	0.3	0.88	0.59	0.57	0.8	0.4	0.55	0.35	0.5	0.39	0.55	0.71	3.1	0.4	1.32
chr1.capped.1202	AT1G10940	29.7	24.15	28.45	19.36	18.41	18.75	18.64	15.89	19.98	37.23	30.4	25.39	8.41	9.92	12.72	13.1	23.66	29.81
chr1.capped.1203	AT1G10950	33.11	27.79	24.31	20.8	23.17	16.62	51.4	37.83	37.74	20.79	28.28	23.95	35.39	31.95	58.43	68.18	22.29	33.03
chr1.capped.1204	AT1G10960	25.55	27.16	28.37	60.65	63.34	32.67	22.91	17.89	30.16	10.48	6.36	7.24	19.92	14.64	13.46	28.61	13.04	14.5
chr1.capped.1206	AT1G10970	3.86	4.14	3.16	1.58	1.36	0.83	2.97	1.9	2.52	9.65	3.89	4.76	6.46	8.57	9.78	5.23	2.25	4.07
chr1.capped.1207	AT1G10980	0.82	1.16	1.55	0.27	0.14	0.18	0.08	0.1	0.32	0.11	0.14	0.14	0.39	0.56	0.28	2.74	1.46	1.51
chr1.capped.1208	AT1G10990	0.9	0.62	0.23	0.2	0.28	0.33	0.16	0.1	0	0.44	0.07	0.36	0.13	0.11	0.28	1.4	2.51	3.46
chr1.capped.1209	AT1G11000	10.89	9.33	11.15	0.5	0.56	0.58	10.62	9.55	18.12	5.17	4.13	4.96	21.11	14.61	37.69	8.56	2.7	5.6
chr1.capped.121	AT1G02020	2.95	2.04	1.25	3	4.03	2.35	2.99	2	2.03	1.43	1.26	0.58	0.91	3.11	3.67	5.34	3.17	4.18
chr1.capped.1210	AT1G11020	7.4	7.81	6.25	4.63	5.9	4.28	11.06	5.67	7.82	5.26	5.36	5.32	11.21	7.53	13.45	14.35	5.95	9.27
chr1.capped.1212	AT1G11040	1.88	2.77	4.1	0	0	0.06	0.24	0.7	0.08	12.49	12.8	7.09	0	0.11	0.14	0.53	0	0.12
chr1.capped.1213	AT1G11050	4.78	3.92	2.47	5.94	5.83	5.02	1.81	1.3	1.54	0.66	0.98	1.01	0.52	1.33	1.41	4.49	3.06	4.18
chr1.capped.1214	AT1G11060	4.1	3.5	3.53	3.03	3.42	2.12	5.54	3.92	4.52	2.3	2.33	2.94	4.77	4.58	7.91	8.07	3.99	6.55
chr1.capped.1215	AT1G11080	0.98	0.88	1.29	0	0.39	0.14	2.82	0.3	1.31	2.07	1.91	0.96	0	0.11	0.28	2.37	1.34	1.54
chr1.capped.1216	AT1G11090	6.98	6.55	5.04	5.83	4.82	3.27	8.63	6.4	5.71	3.3	2.46	2.83	5.16	6.01	8.9	7.88	5.44	7.28
chr1.capped.1218	AT1G11112	0.72	0.62	0.31	0	0.14	0.08	0.25	0	0.24	0.11	0	0.07	0.13	0.34	0.28	0.61	0.52	0.6
chr1.capped.1219	AT1G11120	2.98	2.91	3.38	0.5	0.28	0.16	2.42	1.4	2.95	1.75	1.34	1.19	0.26	0.67	0.85	9.17	4.67	5.2
chr1.capped.122	AT1G02020	0.36	0.14	0.08	0	0.07	0.13	0.32	0	0.24	0	0	0.15	0	0.22	0.28	0.37	0.13	0.12
chr1.capped.1220	AT1G11125	1.43	1.94	0.94	0.4	0	0.09	0.08	0	0.16	0	0	0	0.26	0.11	0.28	4.32	1.74	1.07
chr1.capped.1221	AT1G11130	3.13	2.86	1.37	0.3	0.34	0.25	0.68	0.1	0.68	0.33	0.35	0.56	2.21	1.55	1.18	9.18	3.71	5.73
chr1.capped.1222	AT1G11130	0	0	0	0	0	0	0	0	0	0	0	0	0	0	0	0.15	0	0
chr1.capped.1223	.	1.08	1.17	0.63	2.57	2.57	1.84	1.72	1.72	0.8	0.77	0.44	0.71	1.73	0.92	1.33	1.37	2.16	2.3
chr1.capped.1224	AT1G11170	4.45	2.49	2.68	2.21	2.49	1.59	1	0.6	0.72	5.14	3.11	5	0.52	0.33	0.42	0.35	0.26	0.12
chr1.capped.1225	AT1G11175	8.92	7.15	7.59	13.42	18.3	23.76	8.53	5.51	5.73	10.72	12.21	11.27	12.25	17.17	14.03	11.49	15.16	30.92
chr1.capped.1226	AT1G11180	2.59	1.97	1.85	6.95	8.97	5.78	1.49	0.4	1.95	0.99	0.56	1.3	5.44	4.79	5.22	6.69	4.4	7.16
chr1.capped.1227	AT1G11185	2.31	1.08	1.68	3.13	2.06	1.37	0.92	1.7	1.89	3.27	0.99	1.11	1.93	2.02	1.42	4.27	8.6	10.33
chr1.capped.123	AT1G02020	0	0.26	0	0	0.14	0	0.08	0.2	0.16	0	0	0	0.26	0.65	0.72	0.1	0.27	0
chr1.capped.1230	AT1G11190	3.11	2.83	4.05	0	0	0	0.34	0.2	0	6.78	14.91	9.75	0	0	0	0.33	0.13	0
chr1.capped.1231	AT1G11190	17.74	11.5	17.74	5.44	5.56	4.73	5.14	4.7	5.34	25.45	28.32	29.08	0.77	0.11	0.57	4.46	1.59	2.27
chr1.capped.1232	AT1G11200	8.49	8.96	8.1	9.57	9.12	5.65	8.52	8.01	10.18	6.04	4.71	6.25	7.87	10.38	10.77	20.92	6.28	12.99
chr1.capped.1233	AT1G11220	2.86	1.88	0.98	0.72	1.04	0.61	0	0.1	0.33	0.11	0.14	0.22	0.78	0.33	0	6.31	2.93	2.63
chr1.capped.1234	AT1G11220	0	0.14	0.08	0.1	0.07	0.04	0	0.1	0.08	0	0	0	0.39	0	0	0.44	0.13	0.36
chr1.capped.1235	AT1G11240	16.3	16.09	13.45	11.1	9.76	7.78	17.12	14.55	17.6	7.21	6.63	6.93	21.36	22.48	20.55	24.62	26.32	34.35
chr1.capped.1236	AT1G11250	26.38	26.87	52.57	0.5	0.14	0.7	0.9	4.91	1.62	98.46	125.09	66.92	0	0.77	3.53	4.72	0.52	1.43
chr1.capped.1238	AT1G11260	87.64	69.74	81.26	254.03	263.4	283.35	685.27	277.04	205.22	30.36	60.41	14.35	46.67	74.47	91.62	171.57	108.07	177.56
chr1.capped.1239	AT1G11270	5.11	2.86	3.96	3	3.6	2.18	4.54	3.8	3.49	2.2	3.15	4.69	7.24	7.47	8.76	5.43	4.74	5.63
chr1.capped.124	AT1G02040	29.62	18.3	16.35	0.1	0.07	0.02	1.57	0.6	0.5	43.36	100.43	86.72	0	0.33	0.28	2.14	0	0
chr1.capped.1240	AT1G11280	6.06	5.83	8.17	4.12	2.95	1.64	6.92	5.31	7.21	2.19	0.98	1.69	2.2	2.72	4.91	5.57	1.46	3.59
chr1.capped.1241	AT1G11303	0.45	0.55	0.78	0	0.14	0	2.23	1.25	1.28	0	0	0	0.91	0.55	0.14	0.08	0.13	0
chr1.capped.1242	AT1G11310	5	7.31	7.94	13.6	13.3	14.51	16.14	7.61	7.19	3.4	2.25	2.63	7.12	4.72	5.51	4.59	3.35	8.26
chr1.capped.1243	AT1G11320	1.97	1.14	1.63	0.6	1.68	0.58	1.06	1.4	0.97	0.77	1.05	1.24	1.94	0.66	1.55	2.52	0.53	1.56
chr1.capped.1244	AT1G11330	5.71	3.6	5.75	2.1	2.82	2.04	16.9	8.61	9.31	2.89	3.22	2.76	1.29	1.34	0.98	3.59	1.85	3.35
chr1.capped.1245	AT1G11350	0.45	0.48	0.31	1.4	1.69	1.09	0	0.2	0	0	0	0	1.69	0.67	0.28	0.18	0.13	0.48
chr1.capped.1246	AT1G11360	13.82	11.59	13.28	20.69	22.42	11.07	23.64	17.46	18.4	12.27	9.38	6.5	19.69	21.1	30.2	46.67	16.08	22.98
chr1.capped.1247	AT1G11380	11.17	7.96	8.92	7.03	9.06	5.03	24.26	16.55	19.78	8.45	5.7	4.64	15.07	19.26	19.8	22.13	9.78	11.46
chr1.capped.1249	AT1G11400	0	0	0.24	0.3	0.4	0.04	0.24	0.1	0.16	0.55	0.28	0.15	0.13	0.11	0.28	0.12	0.39	0.48
chr1.capped.125	AT1G02050	0	0	0	0	0	0	0	0	0	0	0	0	0	0	0	0	0	0.12
chr1.capped.1250	AT1G11390	5.38	4.2	2.94	1.7	2.03	1.34	3.56	2.51	3.49	4.72	5.77	5.08	1.95	2.07	4.37	3.65	1.59	3.7
chr1.capped.1251	AT1G11400	15.97	13.52	16.1	8.05	8.32	7.77	21.06	13.74	17.17	17.71	16.32	10.68	8.37	9.82	7.09	27.12	20.1	29.16
chr1.capped.1252	AT1G11410	5.36	4.18	6.01	4.04	5.57	3.17	16.1	13.45	17.43	1.53	2.33	2.36	1.29	0.67	0.56	1.79	0.52	1.2
chr1.capped.1253	AT1G11420	1.08	0.55	0.85	0.2	0.07	0.06	0.16	0.3	0.56	0	0	0.21	0.78	0.77	1.27	0.7	0.66	0.48
chr1.capped.1254	AT1G11430	31.16	32.1	26.14	36.96	42.36	25.29	27.38	22.2	26.81	16.4	13.29	14.42	23.55	22.69	25.52	44.52	19.44	39
chr1.capped.1255	AT1G11440	3.48	4.03	3.13	8.06	8.76	3.92	5.31	4.81	5.32	1.76	3.52	3.26	4.64	4.56	3.67	10.71	7.51	9.9
chr1.capped.1256	AT1G11450	0.27	0.4	0.38	0.3	0.67	0.44	0	0.2	0.32	0	0	0.15	0.65	0	0.56	0.31	0.13	0.12
chr1.capped.1257	AT1G11475	65.01	53.56	54.1	39.49	32.15	23.7	32.17	33.91	45.57	24.21	17.96	20.88	64.63	62.87	88.42	117.23	73.52	80.17
chr1.capped.1258	AT1G11480	25.76	20.39	17.83	14.97	12.79	12.34	24.61	20.08	17.17	37.79	29.81	29.56	21.16	26.13	36.58	26.78	16.14	26.05
chr1.capped.1259	AT1G11500	0.98	1.22	0.93	1.3	1.47	0.45	2.57	1.4	2.22	0.44	0.7	0.36	0.13	0.33	0.28	0.45	0.26	0.6
chr1.capped.126	AT1G02060	1.07	1.15	1.01	0.8	1.34	1.07	1.65	1	1.14	0.11	0.21	0.43	0.65	1.45	1.13	4.05	3.34	3.58
chr1.capped.1260	AT1G11510	1.61	1.48	1.08	0	0	0.04	0.08	0	0	4.6	3.68	3.32	0	0	0.99	0.35	0.13	0.12
chr1.capped.1261	AT1G11530	11.07	8.97	12.2	59.39	56.23	34.25	30.04	21.48	15.11	9.52	11.93	4.13	21	29.79	16.12	10.35	13.09	23
chr1.capped.1262	AT1G11545	13.08	14.31	16.19	1.32	1.83	1.13	13.63	21.14	19.62	15.3	7.93	11.18	0.52	0.44	0.99	4.96	1.48	0.6
chr1.capped.1263	AT1G11570	7.4	5.89	6.92	9.69	8.62	5.04	11.87	11.55	13.59	4.7	3.53	4.95	1.8	0.89	1.14	4.42	4.96	6.78
chr1.capped.1264	AT1G11572	9.82	12.2	20.4	0.1	0.21	0.21	0.08	1.3	0.16	34.46	68.72	38.5	0	0.11	0.7	3.91	0.26	0.24
chr1.capped.1265	AT1G11580	5.53	6.58	4.72	2.83	2.76	1.92	3.47	1.2	4.17	8.84	6.43	5.18	2.2	2.69	3.26	28.92	14.49	15.72
chr1.capped.1266	AT1G11592	5.31	4.76	3.51	5.2	7.07	4.41	6.64	5.41	7.09	3.62	2.88	2.13	7.89	11.9	17.56	11.54	6.74	10.33
chr1.capped.1267	AT1G11600	6.14	5.52	2.8	0.2	0.13	0.32	0.17	1.91	1.81	0.44	0.07	1.47	0.26	0.11	0.28	14.89	4.44	4.05
chr1.capped.1268	AT1G11610	28.14	20.65	25.69	0	0	0.05	1.14	1.3	0.08	41.6	70.94	85.62	0	0.11	1.13	1.04	0	0
chr1.capped.1269	AT1G11620	0	0	0	0	0	0.02	0	0	0	0	0	0.07	0	0	0	0.02	0	0
chr1.capped.127	AT1G02065	2.6	3.11	0.42	0.05	0.14	0.21	0.04	0	0.16	0.22	0	0.04	2.6	1.33	1.54	5.38	1.67	3.36
chr1.capped.1270	AT1G11630	2.33	2.11	1.84	1.71	2.15	0.87	3.64	1.9	2.19	2.3	1.61	1.09	2.2	1.91	2.1	4.49	2.54	2.4
chr1.capped.1271	AT1G11650	52.92	43.1	44.25	64.58	62.66	48.61	71.1	51.62	57.9	40.21	33.44	28.4	44.26	36.12	42.27	84.5	32.89	66.08
chr1.capped.1273	AT1G11660	7.4	6.47	5.62	3.92	4.76	3.33	6.39	3.6	6.37	8.66	10.89	8.55	6.7	7.2	10.66	9.39	3.73	6.84
chr1.capped.1274	AT1G11670	4.82	4.69	3.61	0.4	0.47	0.26	0.75	0.3	0.4	4.39	2.54	3.66	14.34	14.85	46.09	0.71	3.08	4.17
chr1.capped.1275	AT1G11680	28	26.05	26.02	17.99	18.37	13.96	25.11	20.93	24.33	21.98	20.13	17.86	32.44	30.84	47.45	33.71	12.93	24.08
chr1.capped.1276	AT1G11700	3.02	5.79	5.17	14.87	11.14	8.3	0.34	0.7	1.56	1.75	4.46	1.26	2.58	3.02	2.56	3.21	8.74	5.93
chr1.capped.1277	AT1G11700	0.09	0.13	0.15	1.01	0.47	0.41	0	0.1	0	0	0	0	0	0	0	0.04	0.13	0.12
chr1.capped.1278	.	0.09	0	0	0.1	0	0.04	0	0	0	0	0	0	0	0	0	0.04	0.13	0
chr1.capped.1279	AT1G11710	0.45	0.14	0.16	0.71	1.02	0.38	0.08	0	0	0.11	0.14	0.21	0.13	0.11	0	0.55	0.13	1.07
chr1.capped.128	AT1G02065	5.29	4.23	3.4	0.11	0.07	0.34	0.08	0	0.56	0	0.11	0.14	3.25	5.01	3.29	9.42	2.1	5.53
chr1.capped.1280	AT1G11720	3.05	3.02	4	3.42	2.84	1.9	5.52	3.61	3.92	1.1	1.68	1.46	3.23	4.11	2.26	7.29	5.33	7.51
chr1.capped.1281	AT1G11730	1.8	2.09	1.45	0	0.07	0.08	0.82	0.1	0.97	0.33	0.42	0.43	1.04	0.9	1.27	2.83	0.65	3.36
chr1.capped.1284	AT1G11740	4.28	0.14	2.85	0.2	0.07	0.02	1.74	0.4	0.08	4.61	0.56	0.44	0	0	0.28	0	0.13	0.12
chr1.capped.1285	AT1G11750	21.02	22.56	22.15	43.85	50.68	27.62	26.02	24.29	26.09	12.16	7.75	10.09	20.09	17.76	22.67	36.28	17.46	24.97
chr1.capped.1286	AT1G11755	0	0.07	0	0	0	0	0	0	0	0	0	0	0	0	0	0	0	0
chr1.capped.1287	AT1G11755	4.82	3.05	4.3	4.72	5.97	3.37	6.2	3.2	3.26	2.2	1.54	1.74	5.84	5.47	9.6	8.52	4.11	5.84
chr1.capped.1288	AT1G11760	8.27	5.81	5.79	5.64	5.59	3.25	8.27	8.14	7.11	4.04	4.85	3.44	9.61	9.94	11.05	23.67	11.41	20.15
chr1.capped.1289	AT1G11765	183.63	217.41	243.26	0.4	0.13	3.01	1.67	51.35	3.86	997.31	659.81	410.95	0.52	6.71	58.55	38.22	0.66	0.36
chr1.capped.1290	AT1G11770	48.85	61.19	62.24	0.1	0.14	0.31	0.32	15.77	1.06	369.79	199.52	151.98	0.13	0.78	16.45	6.08	0.26	0
chr1.capped.1292	AT1G11780	5.18	4.84	5.79	2.51	3.16	1.2	4.61	3.99	3.1	3.62	3.44	3.23	3.63	4.13	5.37	5.43	5.87	6.56
chr1.capped.1293	AT1G11790	5.01	4.75	4.6	2.76	2.04	1.2	4.05	4.1	4.48	0.77	0.98	1.37	3.5	2.73	5.81	7.26	1.84	2.03
chr1.capped.1294	AT1G11785	0.61	0.37	1.02	0.5	1.23	0.52	0.04	0.25	0	1.09	2.25	1.9	0.25	0.22	0.57	0.54	0.52	0.18
chr1.capped.1295	AT1G11800	2.68	2.98	3.5	4.73	4.5	2.25	2.9	2.5	2.27	3.41	4.13	2.24	4.4	3.65	6.79	6.17	1.99	4.07
chr1.capped.1296	AT1G11820	6	6.45	4.31	10.48	12.3	7.51	13	11.03	7.19	1.54	2.18	1.38	11.88	13.69	17.69	20.91	8.39	12.3
chr1.capped.1297	AT1G11840	110.43	98.98	104.67	66.22	78.08	30.92	85.03	68.01	91.01	89.76	82.08	89.76	126.92	118.73	182.51	170.3	51.74	78.42
chr1.capped.1299	AT1G11850	403.38	417.38	765.42	60.47	47.12	18.01	1969	2086.38	1990.6	282.12	310.6	265.43	179.71	76.72	140.26	18.84	22.31	34.33
chr1.capped.13	AT1G01100	0.63	0.33	0.31	0.2	0.28	0.13	0.33	0.4	0.8	0.55	0.21	0.22	0.26	0.11	0	0.53	0.13	0.24
chr1.capped.130	AT1G02070	7.23	7.73	6.48	0.4	0.27	0.5	11.13	9.62	7.92	0.88	2.18	0.65	10.69	9.25	4.25	19.55	9.21	21.07
chr1.capped.1300	AT1G11860	56.73	47.44	58.39	162.17	155.44	58.48	43.99	37.33	39.52	26.11	19.13	20.72	35.18	23.31	26.19	39.31	19.1	40.58
chr1.capped.1301	AT1G11870	3.39	4.04	1.84	3.33	4.75	2.66	3.65	4.01	3.12	1.65	1.4	1.54	4.12	3	4.25	4.98	1.45	4.28
chr1.capped.1302	AT1G11880	0	0	0.08	0	0	0.06	0.24	0.2	0	0.11	0	0.07	0	0	0.57	0.19	0.53	0.36
chr1.capped.1303	AT1G11880	2.42	1.83	2.69	2.11	1.88	0.78	2.89	2.9	3.02	1.76	0.56	1.22	2.71	2.33	4.8	4.21	1.32	2.87
chr1.capped.1304	AT1G11890	31.7	28.68	39.41	19.97	22.43	15.36	24.15	27.5	44.16	34.87	30.48	26.17	34.63	27.25	64.23	20.76	13.42	12.84
chr1.capped.1305	AT1G11900	1.53	1.48	1.16	1.41	1.81	0.6	1.07	1.2	1.62	1.21	0.91	1.32	1.54	1.43	2.54	2.18	1.48	2.15
chr1.capped.1306	AT1G11905	14.17	10.15	15.04	13.23	11.65	10.11	17.09	13.44	14.79	13.33	13.44	12.47	17.52	19.33	38.25	17.08	9.66	12.02
chr1.capped.1307	AT1G11910	95.16	90.18	81.58	132.02	129.61	146.99	120.56	80.67	109.29	74.73	69.72	66.77	169.74	149.84	332.84	103.39	43.77	89.03
chr1.capped.1308	AT1G11915	0.18	0.68	0.77	0.4	0.4	0.2	0.4	0.7	1.22	0.22	0.21	0.21	0.13	0	0	0.91	0.82	0.48
chr1.capped.1309	AT1G11920	0	0	0	0	0	0	0	0	0	0	0	0	0	0	0	0.02	0	0
chr1.capped.131	AT1G02070	0	0.75	0.24	0	0	0.02	0.34	0.2	0.08	0.11	0.07	0	0.77	1.22	0.99	0.95	0.66	1.56
chr1.capped.1310	AT1G11930	21.96	18.42	18.3	24.99	29.47	15.75	22.89	15.43	19.05	12.73	11.91	11.54	20.21	20.51	19.95	28.39	14.18	23.95
chr1.capped.1311	AT1G11940	4.12	3.99	5.04	5.03	4.6	4.19	5.21	4.31	6.7	4.93	5.55	2.85	7.37	6.57	10.06	5.05	3.18	4.89
chr1.capped.1312	AT1G11950	2.32	0.73	1.32	0.6	0.82	0.55	0.9	0.9	0.48	0.55	0.91	1.29	0.78	0.33	0.7	0.74	0.26	2.15
chr1.capped.1313	AT1G11960	1.17	0.74	0.42	0	0	0	0	0	0.24	1.54	0.84	1.62	0	0	0	0.04	0.2	0
chr1.capped.1314	AT1G11960	7.43	7.58	8.2	1.8	2.27	1.48	6.62	3.78	8.33	4.29	0.56	2.56	2.85	1.99	8.63	2.43	1.69	1.32
chr1.capped.1315	AT1G11980	0	0	0	0	0	0	0	0	0	0	0	0	0	0.13	0	0.06	0	0
chr1.capped.1316	AT1G11990	6.81	8.96	9.02	0	0	0.12	0.16	1.9	0.32	33.91	28.3	20.69	0	0.11	1.7	2.44	0	0.12
chr1.capped.1317	AT1G12000	36.87	26.96	29.74	8.17	8.51	7.41	40.17	36.65	58.41	21.09	15.2	15.44	53.9	50.1	109.16	37.92	11.93	15.58
chr1.capped.1318	AT1G12010	0	0	0.08	1.61	0.81	1.48	0	0	0	0	0	0	0	0	0	0.09	0	0
chr1.capped.1319	AT1G12013	3.93	3.65	4.28	0.7	1.01	1.19	1.24	2.1	2.38	6.36	8.1	5.43	2.58	1.35	1.56	0.76	1.46	2.74
chr1.capped.132	AT1G02080	3.83	2.3	1.47	2.11	1.54	1.53	3.22	4.91	4.07	2.3	2.59	2.25	3.48	2.56	3.12	3.4	2.8	5.12
chr1.capped.1321	AT1G12020	0.18	0.33	0.23	0.2	0.66	0.11	0.33	0.2	0.08	0	0.14	0	0	0.11	0	0.15	0	0.24
chr1.capped.1322	AT1G12020	0.54	0.27	0.39	0.2	0.21	0.4	0.24	0.9	0.24	0	0.28	0.07	0.26	0.11	0.14	0.1	0.13	0.72
chr1.capped.1323	AT1G12020	0.72	1.55	0.84	1.74	3.52	2.14	1.44	2.53	1.15	0.57	0.46	0.49	0.53	0.45	0	2.25	0.87	2.16
chr1.capped.1324	AT1G12050	21.03	18.55	17.97	29.7	26.23	27.22	28.38	18.49	27.99	11.8	11.53	11.17	44.64	47.55	76.69	15.47	4.94	11.76
chr1.capped.1325	AT1G12060	1.25	1.29	2.55	2.61	2.41	1.71	2.91	3.31	3.18	1.1	0.77	0.95	1.55	0.77	1.41	1.91	1.87	1.8
chr1.capped.1326	AT1G12060	0.72	0.55	0.55	0.9	1.14	0.45	0.9	2.31	0.8	0.44	0.63	0.21	0.39	0.33	0	0.72	0.13	0.6
chr1.capped.1327	AT1G12070	13.98	15.91	20.53	0.2	0.07	0.36	1.48	1.1	0.08	51.35	78.68	47.31	1.67	1.99	1.66	4.02	0.53	0.48
chr1.capped.1328	.	0.27	0.28	0.85	0	0	0	0	0	0	0.88	2.96	2.06	0	0	0.14	0.09	0	0
chr1.capped.1329	AT1G12080	422.17	407.43	531.78	339.71	413.99	229.03	1598.24	1722.62	1100.92	631.36	619.56	325.01	165.21	152.67	91.18	324.66	164.92	200.01
chr1.capped.1330	AT1G12090	404.99	427.14	495.14	562.42	630.61	127.48	1632.39	1771.06	1272.97	222.83	197.2	85.64	138.2	94.17	86.65	217.09	107.82	87.19
chr1.capped.1331	AT1G12110	2.59	2.76	2.9	15.84	18.83	12.35	1.08	2.21	0.49	0.55	0.85	0.35	1.67	0.67	2.12	1.41	1.08	2.61
chr1.capped.1334	AT1G12120	4.11	3.45	4.54	6.44	6.48	3.71	9.38	7.41	6.61	5.48	5.01	3.66	3.36	1.89	2.53	3.93	2.82	3.47
chr1.capped.1335	AT1G12120	9.18	8.35	8.82	7.45	5.98	3.8	11.89	12.84	11.65	7.34	6.92	5.92	13.64	11.18	13.01	3.5	7.2	12.36
chr1.capped.1336	AT1G12140	4.18	5.91	4.49	14.86	15.48	9.55	5.81	4.82	5.76	5.02	4.81	4.29	3.48	3.24	11.06	5.36	2.15	3.33
chr1.capped.1337	AT1G12150	9.28	9.92	17.76	3.92	4.27	3.89	2.52	2.51	1.39	38.13	57.77	34.44	0.39	0.55	1.12	3.41	0.92	0.84
chr1.capped.1338	AT1G12160	0.99	0.4	0.39	0.4	0.35	0.39	0.49	1.3	0.48	0.11	0	0.28	0.65	0.33	0.42	1.96	0.79	1.2
chr1.capped.1339	AT1G12200	0.27	0.8	0.46	2.83	3.61	3.55	0.33	0	0.24	1.32	1.41	1.1	0	0	0	0.81	0.13	0.24
chr1.capped.134	AT1G02090	26.48	24.54	26.33	18.23	19.49	13.35	25.8	19.78	24.55	18.04	13.06	9.45	23.92	26.21	45.51	50.34	23.31	29.79
chr1.capped.1340	AT1G12210	1.89	1.84	2.16	0.8	1.03	0.77	2.22	1.9	2	1.43	1.26	1.16	1.95	1.21	2.54	2.9	1.45	1.2
chr1.capped.1341	AT1G12230	56.59	47.85	54.65	31.43	27.75	18.2	133.7	81.78	101.75	37.03	32.36	28.78	164.94	180.28	309.88	31.85	18.26	51.33
chr1.capped.1342	AT1G12240	104.1	74.43	89.06	68.35	52.48	33.92	184.35	142.34	89.39	171.64	156.23	128.41	68.65	203.14	205.2	53.88	67.45	143.62
chr1.capped.1343	AT1G12244	2.86	2.71	4.06	3.31	2.41	1.55	4.23	4.2	3.25	0.99	1.26	0.93	7.64	9.81	6.22	12.17	4.26	6.58
chr1.capped.1344	AT1G12250	4.65	5.19	4.75	16.15	20.77	10.76	17.5	14.13	10.67	2.79	2.79	0.65	6.71	11.61	8.21	11.52	4.54	7.26
chr1.capped.1345	AT1G12260	0.81	0.48	1.01	0.3	0.55	0.39	0.98	0.8	1.92	0.11	0.28	0.29	1.22	0.22	0.42	0.55	0.4	0.6
chr1.capped.1346	AT1G12270	11.67	11.97	10.92	10.49	9.88	6.58	11.03	11.23	10.42	4.6	4.58	3.8	11.99	12.74	12.03	22.8	10.57	21.54
chr1.capped.1347	AT1G12280	0	0.14	0.16	0.3	0.34	0.14	0.08	0	0	0.11	0.07	0	0	0.22	0	0.39	0.4	0
chr1.capped.1348	AT1G12290	0.45	0.21	0.16	0.6	0.34	0.33	0.24	0.4	0.32	0.44	0.07	0.07	0	0	0.14	0.61	0.39	0.6
chr1.capped.1349	AT1G12300	0.81	0.21	0.32	0.2	0.2	0.19	0.33	0.4	1.05	0.11	0.07	0.15	1.04	0.44	0.28	1.74	0.26	1.92
chr1.capped.135	AT1G02100	11.78	9.62	11.67	12.77	12.03	8.3	14.93	9.91	7.99	13.5	11.29	9.66	12.24	16.41	17.42	15.11	9.5	16.78
chr1.capped.1350	AT1G12310	97.72	89.47	102.58	49.5	56.92	35.9	96.48	108.96	94.04	150.6	135.82	126.58	59.82	67.39	80.91	78.15	54.26	77.95
chr1.capped.1351	AT1G12320	6.34	5.26	6.77	11.71	15.75	8.69	10.73	9.63	5.23	8.43	6.23	6.06	0.9	0.45	1.68	6.62	4.04	8.33
chr1.capped.1352	AT1G12330	0.99	1.02	0.85	0.3	0.14	0.37	0.25	1.3	0.9	0.55	0.07	0.22	0	0.11	0	0.48	1.74	1.32
chr1.capped.1353	AT1G12330	20.48	17.54	15.58	14.54	10.13	7.76	33.21	28.92	19.2	5.9	4.3	4.27	5.03	3.9	3.82	45.91	26.97	41.49
chr1.capped.1354	AT1G12340	0	0.09	0.28	0.21	0.33	0.1	0.12	0.16	0.04	0.05	0.04	0	0.12	0.17	0	0.2	0.13	0.36
chr1.capped.1355	AT1G12350	7.56	6.32	5.35	10.68	10.95	7.27	7.94	5.6	7.07	6.76	6.97	5	7.14	9.29	11.84	12.9	5.64	8.15
chr1.capped.1356	AT1G12360	12.05	9.66	11.47	6.74	7.63	6.97	15.59	11.74	8.93	19.15	12.34	13.95	8.78	10.05	15.84	13.43	6.26	15.01
chr1.capped.1357	AT1G12370	3.04	4.63	4.11	0.2	0.13	0.14	0.67	1.3	1.05	13.03	13.69	7.69	0.39	0.44	0.84	4.25	1.58	1.32
chr1.capped.1359	AT1G12380	10.61	7.4	5.43	0.3	0.74	0.34	1.08	1.2	1.3	0.99	0.91	1.75	2.85	1.67	2.84	9.94	9.34	10.84
chr1.capped.136	AT1G02100	1.98	1.58	0.86	0.4	0.28	0.54	0.65	1.2	0.8	0.11	0.35	0.43	2.08	1.98	2.26	2.85	3.85	5.27
chr1.capped.1360	AT1G12390	24.23	20.46	20.58	17.47	19.26	13.16	24.92	22.59	17.91	23.16	21.29	17.19	25.61	37.77	31.32	44.83	27.65	39.1
chr1.capped.1362	AT1G12400	20.77	12.69	18.64	16.67	18.21	10.43	15.11	13.27	13.03	22.34	15.85	18.28	24.68	26.99	43.11	14.48	10.15	11.49
chr1.capped.1363	AT1G12410	36.78	27.26	34.93	50.11	56.21	33.14	43.77	34.92	42.83	21.09	20.5	16.17	35.26	46.37	47.03	40.26	22.97	44.34
chr1.capped.1364	AT1G12420	0.98	0.91	1.63	0	0.07	0	0.08	0	0.56	3.29	3.18	1.83	0.13	0.33	0.42	0.02	0.13	0.24
chr1.capped.1365	AT1G12420	11.13	10.14	9.36	1.61	2.06	2.51	4.9	3.91	8.97	1.53	2.46	3.55	55.02	58.61	97.43	8.26	3.07	5.37
chr1.capped.1367	AT1G12430	6.26	6.93	6.78	3.22	4.44	4.38	5.67	7.16	9.61	1.45	1	1.3	3.53	2.89	3.26	6.07	4.34	6.66
chr1.capped.1368	AT1G12440	18.82	15.04	17.38	33.6	32.67	28.57	16.44	15.13	17.19	8.55	9.37	7.32	8.4	8.91	14.44	9.92	7.48	12.15
chr1.capped.1369	AT1G12440	62.4	54.21	60.65	55.5	70.1	53.06	132.55	109.8	90.59	35.52	38.49	24.26	42.46	46.84	47.37	76.74	63.3	123.56
chr1.capped.137	AT1G02110	3.33	2.3	1.48	0.5	0.88	0.59	1.03	1.31	1.61	0.56	0.42	0.78	2.96	4.66	1.72	6.27	7.71	11.96
chr1.capped.1370	AT1G12440	2.52	2.53	3.2	3.94	4.6	2.38	3.48	3.71	5.71	0.55	1.9	0.88	0.65	0.11	0.28	0.73	0.26	0.6
chr1.capped.1371	AT1G12450	28.81	26.06	33.03	13.1	15.54	7.43	26.05	26.58	33.34	17.52	20.4	18.81	7.6	6.57	9.63	9.87	5.34	10.14
chr1.capped.1372	AT1G12450	17.36	20.79	24.31	1.6	2.34	0.96	0.89	6.41	1.21	85.09	58.83	48.88	0.78	0.77	5.65	4.54	0.78	0.84
chr1.capped.1373	AT1G12460	5.54	4.79	4.5	0.9	0.75	0.4	7.61	6.29	7.78	0.77	0.77	0.95	0.56	0.77	0.76	3.62	3.59	3.4
chr1.capped.1374	AT1G12460	0.54	0.55	0.53	0.1	0	0.02	0.41	0.5	0.4	0	0.21	0.07	0	0	0	0.87	0.13	0.12
chr1.capped.1375	AT1G12460	0.27	0.48	0.16	0.4	0.48	0.06	0.24	0.1	0.16	0.11	0.21	0.07	0.26	0.11	0.14	0.58	0.26	0.48
chr1.capped.1376	AT1G12470	7.06	4.79	3.51	4.03	5.36	2.56	6.54	4.21	4.99	3.84	3.45	3.31	5.43	4.7	9.48	6.99	2.27	4.89
chr1.capped.1377	AT1G12480	0.36	0.27	0.53	5.94	6.1	3.1	0	0.1	0	0.49	0.14	0.37	0.26	0.11	0.28	0.04	0	0
chr1.capped.1379	AT1G12500	28.38	26.42	27.93	11.33	14.01	8.91	42.4	47.39	46.92	26.99	11.62	15.09	32.73	27.31	68.74	18.06	11.78	16.51
chr1.capped.138	AT1G02120	6.46	5.6	5.5	9.46	10.54	6.86	8.45	7.31	4.82	1.65	2.46	2.61	6.89	7.04	8.89	15.04	4.65	12.52
chr1.capped.1381	AT1G12520	14.18	11.56	13.16	24.24	25.87	13.2	29.76	25.88	21.15	10.63	11.16	3.38	21	23.13	21.13	26.17	10.72	21.63
chr1.capped.1382	AT1G12530	13	12.54	11.22	12.99	12.64	8.49	10.88	9.49	10.8	9.34	10.35	11.09	19.07	24.65	21.86	16.56	12.05	16.35
chr1.capped.1383	AT1G12550	5.29	4.15	4.43	2.21	3.17	1.81	4.06	3.61	4.08	2.2	2.1	1.83	3.11	3	4.64	5.94	2.8	2.16
chr1.capped.1384	AT1G12570	11.39	10.22	13.92	0.2	0.14	0	33.3	24.5	35.24	5.68	6.73	5.74	4.4	2.66	3.68	0.31	0	0.24
chr1.capped.1385	AT1G12570	1.17	0.95	1.68	0.05	0	0	5.19	4.8	3.99	0.22	0.69	0.21	0.9	0.64	0	0.02	0	0
chr1.capped.1386	AT1G12580	8.23	8.65	7.68	3.35	3.85	3.1	11.62	9.34	7.82	3.6	2.49	3.29	6.35	6.42	10.07	15.71	5.49	9.96
chr1.capped.1387	AT1G12600	0.9	0.8	1.82	0	0	0	0	0	0.08	1.54	6.41	2.33	0	0	0	0.05	0	0.12
chr1.capped.1388	AT1G12600	0.27	0.41	0.85	0.1	0	0.04	0.17	0.2	0	1.43	3.59	1.9	0	0	0	0.02	0	0.12
chr1.capped.1389	AT1G12600	5.63	1.64	2	0.2	0.07	0.06	0.83	0.2	0.16	9.41	6.49	9.19	0	0	0.14	0.45	0.66	0.24
chr1.capped.139	AT1G02130	26.19	24.41	21.73	27.56	27.39	16.55	28.46	24.17	22.5	20.94	14.49	16.72	23.81	29.85	31.94	42.43	18.64	27.38
chr1.capped.1390	AT1G12610	7.74	6.26	11.25	0.3	0.13	0.96	5.07	1.51	7.41	6.01	0.71	8.21	0.51	2.79	26.95	0.73	1.21	0.95
chr1.capped.1391	AT1G12620	2.33	2.83	1.32	1.51	0.83	0.9	1.82	1.4	1.79	2.2	1.4	1.54	1.17	0.55	2.83	2.56	1.6	3.46
chr1.capped.1392	AT1G12650	10.25	7.59	7.92	7.06	8.34	5.03	9.55	6.31	5.33	5.15	4.58	3.3	7.61	10.28	8.08	23.16	10.18	15.45
chr1.capped.1393	AT1G12640	34.42	22.55	18.99	24.59	26.8	19.94	19.84	11.69	11.74	42.16	40.91	45.8	13.11	13.31	20.19	12.16	6.11	10.77
chr1.capped.1394	AT1G12650	0.36	0.46	0.16	0.7	1.01	0.43	0.24	0	0.16	0	0.21	0.15	0.39	0.44	0.14	1.1	0	0.3
chr1.capped.1395	AT1G12680	6.4	6.73	6.61	7.78	7.54	4.76	6.89	6.02	6.92	9.52	8.42	6.13	6.96	5.7	8.51	13.12	5.76	8.09
chr1.capped.1396	AT1G12700	0.63	0.55	0.24	0.9	0.41	0.25	0.42	0.4	0.32	0.22	0.07	0.21	0.52	0.11	0.14	0.72	0.39	0.12
chr1.capped.1397	AT1G12710	8.13	6.74	9.61	12.4	12.97	4.59	14.75	6.21	9.92	4.5	4.8	4.34	6.46	4.55	6.64	4.94	2.12	5.97
chr1.capped.1398	AT1G12730	2.07	1.82	2.62	7.15	7.89	2.99	3.79	2.6	2.04	1.54	1.33	1.31	2.71	3.57	4.26	5.41	1.72	4.06
chr1.capped.1399	AT1G04967	68.51	68.15	142.57	0	0	0.9	0.33	8.94	1.48	237.36	381.41	179.32	0	0	7.36	11.83	0.13	0.12
chr1.capped.14	AT1G01100	431.33	344.04	355.45	140.45	137	93.85	358.61	322.35	387.67	174.88	143.49	145.13	282.19	277.02	274.12	664.01	511.49	689.49
chr1.capped.140	AT1G02145	6.45	4.42	5.13	4.62	4.37	2.33	5.25	3	5.71	7.22	4.13	3.94	7.23	6.88	8.04	9.04	3.33	6.57
chr1.capped.1400	AT1G12760	13.12	13.31	15.41	14.98	16.12	11.63	15.75	10.03	11.72	19.28	18.03	12.71	13.27	12.73	23	15.17	9.74	15.09
chr1.capped.1401	AT1G12750	3.08	3.76	3.07	2.11	2.09	1.29	2.21	2.31	2.03	0.88	0.84	1.09	2.2	2.51	2.11	6.91	5.47	8.82
chr1.capped.1402	AT1G12770	2.68	2.43	2.37	1.91	3.09	1.84	2.56	2.41	2.19	0.66	0.56	0.57	2.96	2.45	4.23	7.8	2.4	5
chr1.capped.1403	AT1G12775	1.07	0.89	0.69	0.3	0.48	0.13	0.98	0.8	0.98	0.66	0.35	0.29	1.42	0.55	0.85	3.28	1.47	0.96
chr1.capped.1406	AT1G12780	72.75	62.77	73.37	167.26	195.34	197.24	180.54	136.6	81.1	145.39	164.99	115.58	47.46	50.44	30.91	37.89	22.29	62.07
chr1.capped.1407	AT1G12790	3.04	2.5	3.19	5.25	5.43	4.74	5.47	4.42	3.53	2.4	3.74	2.81	3.49	4.68	4.67	4.02	2.54	7.26
chr1.capped.1408	AT1G12800	5.09	3.64	4.21	7.15	7.09	2.4	2.65	3.4	4.09	0.88	0.77	1.38	2.73	1.99	1.56	4.6	0.91	4.77
chr1.capped.1409	AT1G12805	0.54	0.68	0.45	0.2	0.2	0.11	0	0	0.49	0.33	0.49	0.22	0	0	0.7	0.3	0.13	0.24
chr1.capped.141	AT1G02140	128.64	92.9	105.21	95.81	81.47	54.39	72.8	58.47	74.03	89.88	68.4	65.08	103.6	109.88	184.09	136.83	107.33	149.27
chr1.capped.1410	AT1G12810	32.24	29.24	40.22	49.14	43.71	36.78	38.01	30.13	29.78	51.25	57.32	43.87	33.96	34.46	62.39	24.08	19.58	29.97
chr1.capped.1411	AT1G12820	5.88	5.68	4.29	4.84	6.93	3.47	6.47	4.41	3.11	3.97	2.54	3.15	5.51	9.72	9.35	16.55	6.19	11.55
chr1.capped.1412	AT1G12830	22.44	16.43	16.6	13.44	13.46	8.27	14.93	9.71	15.13	8.98	6.14	7.37	17.77	26.36	31.72	37.1	27.08	30.94
chr1.capped.1413	AT1G12840	61.75	56.03	60.11	48.92	55.5	31.67	69.62	55.64	72.6	68.17	65.25	55.41	64.33	61.14	119.23	63.24	21.88	36.37
chr1.capped.1414	AT1G12845	82.76	77.92	99.35	13.83	14.16	3.66	107.22	113.94	175.04	27.32	26.45	27.22	24.58	18.56	13.31	37.36	24.03	35.06
chr1.capped.1415	AT1G12850	14.52	15.26	12.44	11.9	10.89	7.05	17.01	16.76	19.06	8.76	9.51	9.9	14.94	14.28	18.39	20.15	7.91	12.38
chr1.capped.1416	AT1G12860	2.95	2.16	2.01	2	3.07	1.48	3.85	3.7	3.26	0.55	0.42	0.57	2.21	1.99	1.4	2.86	2.52	6.93
chr1.capped.1417	AT1G12860	0.18	0.14	0.24	0	0.21	0.07	0	0.1	0	0	0	0.07	0.13	0.11	0.14	0.28	0.53	0.36
chr1.capped.1418	AT1G12860	0.81	1.03	0.23	0.8	1.48	0.82	0	0.3	0.49	0	0.07	0.07	0.66	0.33	0.42	0.72	0.4	1.47
chr1.capped.1419	AT1G12880	18.29	14.05	14.74	6.65	8.1	3.98	1.97	1.6	1.61	13.69	20.27	14.5	11.99	14.49	14.71	12.97	15.68	14.53
chr1.capped.142	AT1G02150	11.48	8.23	7.94	22.83	22.91	11.15	14.44	10.12	8.21	3.84	3.59	4.28	13.66	15.75	16.86	19.89	9.91	23.08
chr1.capped.1420	AT1G04983	1.43	1.08	2.18	0	0	0.16	0	0.2	0.24	0.11	0.07	0.07	6.2	5.1	6.46	8.41	2.9	1.92
chr1.capped.1421	AT1G12900	63.8	59.16	72.29	166.61	199.16	71.34	71.05	49.92	60.24	28.73	17.9	18.26	52.46	42.23	31.33	76.74	26.44	54.07
chr1.capped.1422	AT1G12910	25.46	20.74	22.83	21.22	21	17.58	47.66	29.83	27.19	16.95	14.36	10.05	34.73	45.04	51.2	63.03	33.83	52.76
chr1.capped.1423	AT1G12920	22.79	19.79	17.97	14.75	15.84	11.82	23.41	17.49	18.59	9.52	11.24	12.19	16.1	18.96	20.25	40.47	23.06	29.38
chr1.capped.1424	AT1G12930	2.71	1.96	1.74	1.61	1.74	1.33	4.48	2.6	2.43	0.89	0.71	1.29	2.47	2.41	1.68	3.4	1.07	3.38
chr1.capped.1425	AT1G12970	5.37	3.71	6.2	5.14	5.63	4.76	4.28	4.51	5.08	7.78	6.34	4.56	7.36	5.87	8.18	7.87	4.55	6.1
chr1.capped.1426	AT1G12990	15.4	12.24	13.28	2.4	2.69	1.53	8.93	5.3	10.36	9.62	8.53	12.33	1.69	1.22	7.1	3.93	2.39	2.15
chr1.capped.1427	AT1G13000	6.19	5.75	5.45	7.56	8.09	6.05	12.27	8.71	8.5	2.64	2.74	3.05	8.8	5.91	9.05	3.22	5.03	5.13
chr1.capped.143	AT1G02160	46.81	36.1	40.01	51.15	45.47	28.21	44.17	41.39	44.56	24.9	23.3	26.25	65.6	66.66	87.91	69.07	43.26	55.85
chr1.capped.1432	AT1G13020	6.25	7.33	6.25	3.62	3.76	3.22	6.73	5.1	6.33	3.73	5.17	4.71	5.54	5.91	8.5	3.9	4.69	7.61
chr1.capped.1433	AT1G13030	4.38	2.5	2.05	2.93	1.22	1.04	1.66	1.6	2.46	0.44	0.77	1.03	3.61	3.78	5.25	11.71	5.74	6.79
chr1.capped.1434	AT1G13040	0.54	0.34	0.24	0.3	0.47	0.18	0.16	0.6	0.24	0.22	0.28	0.28	0.26	0.88	0.7	1.75	0.79	0.84
chr1.capped.1435	AT1G13060	16.24	21.32	17.87	9.88	12.77	12.43	22.51	17.26	26.92	15.09	12.07	12.53	14.93	14.42	18.12	36.87	12.87	21.16
chr1.capped.1436	AT1G13080	1.16	1.38	1.5	3.52	4.21	1.72	0.5	0.7	0.64	3.73	1.75	1.32	0.26	0.22	0.43	0.72	0.26	0.84
chr1.capped.1437	AT1G13090	4.8	4.35	4.19	9.35	9.59	5.57	2.71	2	2.99	1.54	1.93	1.9	2.2	2.56	2.32	5.51	3.03	6.81
chr1.capped.1438	AT1G13110	2.14	1.37	1.34	0.6	0.41	0.29	0.48	0.5	0.81	0.33	0.63	0.21	0.52	0	0.42	5.06	2.54	5.01
chr1.capped.1439	AT1G13120	1.07	0.95	0.31	0.71	0.74	0.23	0.25	0.8	0.24	0	0	0.3	0.9	1.67	1.69	1.75	0.53	1.07
chr1.capped.144	AT1G02170	10.38	12.2	10.08	17.05	17.5	12.72	15.48	11.02	10.08	16.87	19.72	12.76	16.99	19.1	27.35	17.88	7.22	10.15
chr1.capped.1440	AT1G13120	7.33	6.95	6.67	7.56	7.64	4.43	7.11	6.3	6.63	5.93	4.58	4.89	8.78	8.23	12.14	12.53	5.86	10.27
chr1.capped.1441	AT1G13130	7.76	4.73	7.45	0.1	0.07	0.07	0.32	0.1	0.41	5.47	26.46	20.89	3.86	4.9	16.58	1.1	0.26	0.12
chr1.capped.1443	.	0.18	0.07	0.24	0.2	0.4	0.14	0.32	0.2	0	0.22	0.07	0.07	0.13	0.55	0.14	1.42	0.65	0.84
chr1.capped.1444	.	4.92	4.69	3.78	6.85	6.97	5.47	7.44	6.81	4.08	3.19	2.89	1.74	5.29	6.79	5.23	6.88	8.94	10.97
chr1.capped.1445	AT1G13140	0	0	0.16	0	0	0.02	0.08	0	0	0.33	0.21	0	0	0	0	0.02	0	0
chr1.capped.1446	AT1G13140	0	0	0.91	0	0	0	0	0	0.08	0.11	0	0.04	0	0	0	0	0	0
chr1.capped.1447	AT1G13150	0.18	0	1.22	0	0	0	0	0	0	0.11	0	0	0	0	0	0	0	0
chr1.capped.1448	AT1G13160	5.17	3.48	3.04	2.42	2.28	1.55	3.08	2.1	3.51	1.68	1.27	1.92	2.09	2.95	5.82	7.72	3.76	3.13
chr1.capped.145	AT1G02180	4.92	5.38	5.96	2.22	1.41	1.44	3.29	4.3	4.41	1.97	1.26	1.02	2.58	2.23	1.42	12.36	6.41	8.82
chr1.capped.1450	AT1G13170	2.88	3.58	3.98	1.71	1.64	1.04	5.92	4.5	6.38	1.87	1.92	2.34	5.2	7.78	7.48	6.21	3.77	5.83
chr1.capped.1451	AT1G13180	6.88	3.38	4.21	8.07	8.51	3.7	7.46	5.02	6.81	2.74	1.76	3.01	6.57	8.79	14.15	8.85	3.06	6.44
chr1.capped.1452	AT1G13190	18.81	19.35	21.27	31.04	35.69	24.34	38.68	30.2	31.69	17.21	22.57	14.63	24.46	32.17	35.95	24.71	18.08	26.42
chr1.capped.1453	AT1G13195	0.63	0.6	0.86	1.11	1.47	0.52	0.82	0.5	0.41	0.33	0.28	0.22	0.26	0	0.14	1.24	0.92	0.72
chr1.capped.1454	AT1G13195	4.07	4.15	4.77	5.05	4.16	4.09	5.8	2.62	3.88	3.56	1.99	2.34	6.93	7.72	6.85	8.43	6.19	8.47
chr1.capped.1455	AT1G13210	5.46	4.12	4.5	7.65	5.75	5.95	2.23	3	2.91	2.41	0.63	1.81	5.3	4.34	15.45	1.05	1.45	2.63
chr1.capped.1456	AT1G13220	14.78	10.42	7.44	11.19	9.99	6.41	9.82	9.3	9.51	5.78	4.48	4.68	13.03	13.93	19.71	19.91	11.23	18.44
chr1.capped.1457	AT1G13230	1.81	1.3	0.69	0.4	0.48	0.55	0	0.1	0.08	0	0	0	0.26	0.33	0	7.05	3.99	3.77
chr1.capped.1459	AT1G13245	14.16	9.56	8.2	29.63	43.45	41.88	17.84	13.36	10.29	3.83	5.66	2.13	48.46	38.68	27.51	44.43	25.51	45.51
chr1.capped.146	AT1G02190	30.81	29.92	23.73	6.77	7.15	3.39	44.19	30.23	36.75	12.57	7.27	10.35	2.2	1.66	2.39	124.99	25.8	21.04
chr1.capped.1460	AT1G13250	4.11	8.02	5.19	1.51	2.09	0.79	6.64	8.62	10.24	0.88	1.47	1.31	8.25	8.36	6.08	29.5	11.68	14.65
chr1.capped.1461	.	0	0	0	0	0	0.02	0	0	0	0.11	0	0	0	0	0.14	0	0	0
chr1.capped.1462	AT1G13260	10.28	10.02	9.39	14.15	17.24	9.48	2.57	1.3	1.73	4.04	0.7	1.24	6.45	13.51	30.17	17.9	5.21	8.58
chr1.capped.1463	AT1G13270	12.48	12.47	10.08	32.34	28.93	20.67	7.91	8.13	8.85	2.96	2.54	3.75	11.83	11.28	15.01	13.69	10.04	22.13
chr1.capped.1464	AT1G13280	46.51	42.99	45.64	22.26	22.92	11.69	47.56	46.67	51.93	37.18	25.71	35.43	34.5	30.83	27.61	112.48	44.39	59.11
chr1.capped.1466	AT1G13320	13.02	10.83	10.12	9.7	9.4	6.47	13.29	10.72	11.49	10.52	10.24	9.84	11.46	11.18	18.72	19.79	6.14	10.5
chr1.capped.1467	AT1G13330	3.65	2.89	2.38	0.4	0.67	0.73	0.5	2.5	1.22	0.44	0.42	0.73	2.95	3.23	3.97	4.04	3.62	4.89
chr1.capped.1470	AT1G13350	9.94	10.1	9.7	7.28	11.29	7.64	14.42	14.85	11.17	12.92	14.55	12.63	6.7	8.59	9.19	17.07	8.43	10.84
chr1.capped.1471	AT1G13360	1.7	1.08	2.45	0.6	0.61	0.76	0.73	1.4	1.46	1.1	1.76	2.12	0	1.11	0.14	0.23	2.93	1.08
chr1.capped.1472	AT1G13360	3.58	3.35	3.29	3.72	3.4	3.2	6.53	5	4.82	3.95	3.44	2.64	3.34	5.76	6.79	7.29	4.26	6.81
chr1.capped.1473	AT1G13360	15.03	16.07	19.16	25.08	33.04	21.06	25.08	23	21.52	31.22	30.37	17.39	8.23	6.49	11.9	22.47	12.9	12.48
chr1.capped.1474	AT1G13370	0.62	0.2	0.53	0.1	0.14	0.16	0.08	0.6	0.9	0.22	0.07	0.07	0.13	0.22	0	0.82	0.53	0.12
chr1.capped.1475	AT1G13380	27.86	23.23	21.77	12.51	14.82	11.57	24.56	23.39	23.12	4.05	4.87	5.38	20.46	19.58	20.97	70.16	31.68	38.27
chr1.capped.1477	AT1G13390	19.75	18.61	17.67	50.43	36.08	32.04	17.68	11.67	10.31	21.05	12.42	11.32	10.27	21.45	19.89	7.83	21.08	28.37
chr1.capped.1478	AT1G13390	17.18	15.41	20.55	5.65	8.36	3.7	19.65	12.26	18.53	12.96	12.88	8.91	13.57	9.31	24.71	13.11	4.54	7.02
chr1.capped.1479	AT1G13390	2.94	2.55	2.6	2.41	0.87	1.29	3.07	1.3	2.84	1.21	1.62	1.1	1.68	1.11	3.53	0.22	1.06	0.96
chr1.capped.148	AT1G02205	121.81	137.38	127.21	93.03	99.38	31.88	186.63	135.84	180.78	105.9	58.28	59.42	50	33.98	42.24	60.22	17.88	29.1
chr1.capped.1480	AT1G13410	0.54	0.35	0.77	0.3	0.88	0.75	0.98	0.4	0.98	0.11	0.14	0.21	0.65	0.77	1.41	0.93	0.39	0.72
chr1.capped.1481	AT1G13420	0.09	0.13	0.24	0.1	0	0.06	0.08	0.1	0	0.55	0.07	0.29	0	0	0	0	0	0
chr1.capped.1483	AT1G13440	148.49	134.11	139.55	136.31	179.44	118.24	234.63	143.97	187.71	106.66	79.56	63.56	223.21	239.43	333.67	291.3	84.55	132.46
chr1.capped.1484	AT1G13448	0.18	0.63	0.16	1.1	1.36	0.38	0.32	0.2	0	0	0.14	0.07	0.26	0	0.42	0.58	0.65	1.91
chr1.capped.1485	AT1G13450	7.4	6.12	6.28	7.64	9.29	7.16	12.95	10.51	7.71	7.36	5.98	4.2	14.56	19.41	19.69	23.31	9.64	18.8
chr1.capped.1486	AT1G13460	8.93	6.18	7.02	5.13	6.71	3.29	2.4	3.25	4.6	11.38	13.94	8.76	3.35	3.78	4.93	4.04	3.15	3.11
chr1.capped.1487	AT1G13560	17.92	18.3	20.13	11.9	14.7	9.76	25.55	14.32	22.66	13.81	12.14	11.02	17.17	17.85	32.3	40.6	9.99	20.36
chr1.capped.1488	AT1G13570	10.98	7.16	5.84	5.53	6.1	4.7	12.84	10.23	9.76	10.2	8.31	6.78	11.89	12.4	16.31	17.03	7.61	14.42
chr1.capped.1489	AT1G13580	9.64	5.59	7.72	6.02	6.9	2.46	9.51	9.94	15.81	4.51	4.22	4.77	8.4	7.33	12.87	5.1	2.77	5.13
chr1.capped.1491	AT1G13630	0.81	0.47	0.39	0.9	0.2	0.21	0.57	0.6	0.32	0.11	0.07	0.07	0.52	0.22	0.85	0.63	0.93	0.84
chr1.capped.1492	AT1G13635	1.16	0.07	0.53	0	0	0	0.16	0.1	0	1.43	0.14	0.14	0.13	0	0	0	0	0
chr1.capped.1493	AT1G13640	6.96	5.45	4.64	7.05	6.15	4.75	11.22	7.91	5.72	7.35	9.24	7.33	9	13.88	11.46	10.62	4.53	11.33
chr1.capped.1494	AT1G13650	0	0.14	0.15	1.71	1.96	0.55	0	0.1	0.08	0	0	0	0	0	0	0.02	0	0
chr1.capped.1495	AT1G13670	1.07	0.87	1.06	0.2	0	0.12	0.42	1	0.73	0.33	0.21	0.15	0	0.11	0	2.98	0.8	0.6
chr1.capped.1496	AT1G13690	17.21	15.68	13.82	12.99	13.12	9.82	13.7	11.2	13.34	7.91	5.83	6.4	12.62	15.07	18.27	35.77	17.84	23.83
chr1.capped.1497	AT1G13700	2.69	1.35	3.1	3.42	2.9	1.33	5.2	5.71	5.36	1.32	2.46	1.74	1.69	1.88	0.57	1.94	1.27	2.63
chr1.capped.1498	AT1G13710	0.36	0.2	0.16	0	0	0	0.08	0	0	0	0	0	0	0	0	0.83	0.27	0.24
chr1.capped.1499	AT1G13730	4.04	3.33	2.18	1.5	0.83	0.7	3.62	2.5	2.35	1.76	0.56	0.78	3.24	4.1	3.09	7.13	2.6	5.27
chr1.capped.15	AT1G01110	3.86	5.4	2.25	0.3	0	0.37	2.88	3.6	4.08	0.77	0.98	1	2.6	1.55	3.37	8.5	5.7	6.22
chr1.capped.150	AT1G02220	1.43	0.6	2.13	1.31	1	0.29	0	0.2	0	0.98	6.29	4.29	0	0.22	0.28	0.26	0.4	0
chr1.capped.1500	AT1G13740	4.11	4.15	3.75	1.7	2.63	1.86	8.79	4.13	4.27	3.86	2.17	1.62	3.75	4.33	2.11	4.17	2.25	4.3
chr1.capped.1501	AT1G13750	0.54	0.27	0	0.4	0.67	0.49	0.25	0.3	0.32	0	0.14	0	0.39	0.11	0.14	0.23	0.13	0.24
chr1.capped.1502	AT1G13770	3.03	3.44	2.83	3.72	3.3	2.39	5.03	4.2	4.49	1.54	2.6	2.35	2.69	2.67	4.66	6.81	4.54	4.89
chr1.capped.1503	AT1G13780	1.88	2.23	1.85	2.01	2.07	1.62	2.8	2.61	1.96	1.42	2.11	1.9	4.25	2.24	2.69	5.9	3.05	3.81
chr1.capped.1504	AT1G13790	4.38	3.37	1.62	0.2	0.54	0.31	1.58	1.8	1.96	0.88	0.92	1.02	4	3.69	6.52	10.26	3.35	3.69
chr1.capped.1505	AT1G13800	1.61	0.68	0.69	0.5	0.34	0.05	0.58	0.3	0.16	0.11	0	0.14	0.77	0.45	0.7	1.44	0.66	0.83
chr1.capped.1506	AT1G13810	1.53	1.54	1.09	1.31	1.74	0.71	0.83	0.5	0.81	0.44	0.56	0.66	1.42	1.22	1.97	3.3	2.28	2.86
chr1.capped.1507	AT1G13820	4.2	3.12	5.65	16.57	16.63	5.59	5.06	2.7	2.68	1.65	1.12	1.32	5.05	3.22	1.82	3.9	1.73	3.6
chr1.capped.1508	AT1G13830	0.54	0.49	0.48	0	0.28	0.22	0.16	0.1	0.08	0.55	0.42	1.22	0.26	0.44	0.98	0.33	0.13	0.12
chr1.capped.1509	AT1G13860	2.52	1.59	1.55	0.4	0.89	0.29	2.88	1.8	3.48	2.74	2.38	2.33	0.78	0.99	2.96	1.56	0.65	0.96
chr1.capped.151	AT1G02260	3.58	3.3	3.33	4.41	4.3	3.58	6.07	4.4	4.86	1.98	1.68	1.8	5.2	7.71	10.05	6.65	3.3	6.71
chr1.capped.1510	AT1G13870	7.74	7.06	6.99	6.97	6.75	5.09	10.12	8.74	7.83	4.26	4.1	3.33	4.5	7.27	9.36	15.94	7.66	13.07
chr1.capped.1511	AT1G13880	16.49	12.79	16.11	13.94	9.96	6.83	17.43	15.74	15.26	13.81	9.74	8.91	9.28	8.14	16.14	11.15	10.83	14.43
chr1.capped.1512	AT1G13890	12.22	14.01	21.56	0.2	0	0.26	0.4	2.91	0.65	70.16	65.04	34.92	0	0.33	1.69	3.34	0.13	0
chr1.capped.1514	AT1G13900	8.02	8.68	9.07	4.45	6.25	4.11	9.18	6.82	7.4	23.14	23.23	17.96	9.67	9.25	26.51	8.48	2.67	2.98
chr1.capped.1515	AT1G13910	2.86	2.93	1.92	3.31	4.16	2.09	2	1.61	2.12	3.29	1.83	2.04	1.55	1.56	2.26	3.09	3.2	3
chr1.capped.1516	AT1G13920	2.41	1.89	1.54	2.83	2.92	1.2	2.52	2.81	3.17	0.99	0.89	0.73	0.9	0.11	0.99	3.04	0.8	1.67
chr1.capped.1517	AT1G13920	2.41	0.96	1	2.11	2.26	0.43	1.57	1.3	1.63	1.21	0.77	0.29	1.16	0.44	0.14	0.94	0.66	2.03
chr1.capped.1518	AT1G13930	1320.59	1064.29	1495.47	1232.75	933.31	398.49	1295.28	864.16	1318.86	1294.05	499.11	447.24	1293.55	941.1	1830.04	138.27	281.09	606.01
chr1.capped.152	AT1G02270	14	12.66	15.45	7.36	6.9	4.28	4.54	3.5	6.57	5.7	4.01	5.46	5.03	4.11	13.19	6.69	3.07	6.42
chr1.capped.1521	AT1G13940	0.9	0.88	0.42	0.1	0.07	0.11	1.02	0.7	0.56	0.99	0.63	0.73	0.65	0.45	0.71	0.5	0.65	0.72
chr1.capped.1522	AT1G13940	1	1.22	0.79	1.16	1.3	1.13	1.07	0.9	1.22	0.44	0.21	0.35	0.67	0.89	1.55	1.34	0.92	2.04
chr1.capped.1523	AT1G13950	24.69	14.35	15.06	6.76	6.03	4.36	3.71	2.8	1.72	42.97	39.78	43.46	0.26	0.56	1.26	4.77	1.99	3.82
chr1.capped.1524	AT1G13960	7.43	5.28	7.55	15.2	13.08	16	13.47	9.11	7.88	8.65	5.21	3.88	2.2	4.67	6.36	0.77	2.25	7.55
chr1.capped.1525	AT1G13970	63.7	66.43	64.31	0.4	0.14	0.93	2.07	14.94	1.47	264.24	194.67	157.02	1.17	1.87	22.4	11.03	0	0.48
chr1.capped.1526	AT1G13980	7.94	5.8	6.42	5.44	4.34	3.12	10.2	8.83	7.98	8.76	7.07	4.55	5.03	6.48	8.93	8.98	2.92	11.32
chr1.capped.1527	AT1G13990	15.24	13.78	17.23	83.42	81.92	66.85	12.32	3.5	3.49	25.48	25.48	12.73	0.65	3.44	3.1	6.58	5.04	9.69
chr1.capped.1528	AT1G14000	18.38	12.54	15.55	13.75	17.69	12.05	24.85	14.47	20.38	16.81	9.24	10.83	6.47	6.96	12.02	11.28	5.86	8.13
chr1.capped.1529	AT1G14010	33.65	32.9	35.05	16.86	20.98	10.15	27.15	23.69	30.65	37.37	45.44	30.47	93.09	95.47	128.2	44.17	14.35	19.16
chr1.capped.153	AT1G02280	0	0.07	0.24	0.2	0.27	0.11	0.08	0	0	0	0	0.07	0.13	0	0.14	0.31	0.26	0.24
chr1.capped.1530	AT1G14020	6.52	5.93	7.72	3.22	2.16	1.55	5.61	4.4	5.88	14.33	17.26	12.55	3.74	4.57	5.78	2.53	2.25	1.2
chr1.capped.1531	AT1G14030	2.06	3.78	2.25	3.83	4.96	2.14	2.65	2	2.01	0.55	0.85	0.58	3.35	2.45	3.25	5.32	3.04	4.54
chr1.capped.1532	AT1G14040	2.58	1.81	2.13	0.4	1.28	0.83	2.16	3	3.86	1.21	1.27	0.95	2.7	1.67	5.26	0.5	0.13	1.56
chr1.capped.1533	AT1G14040	0.89	1.01	0.62	0	0	0	0.66	1.31	4.43	0.22	0.14	0.3	0	0	0.14	0	0	0.12
chr1.capped.1534	AT1G14040	0.72	0.83	1.16	0.9	0.41	0.39	1.39	2.3	2.21	0	0.77	0.22	0.52	0.55	1.26	0.37	0.39	1.44
chr1.capped.1535	AT1G14040	0.63	1.29	0.54	1.21	0.47	0.4	0.75	1.2	1.07	0.33	0.14	0.44	1.16	1.68	0.56	2.73	1.21	1.19
chr1.capped.1536	AT1G14060	9.81	8.02	7.78	6.26	5.94	2.97	5.15	4.1	7.16	2.41	2.6	3.31	9.78	8.92	13.62	10.7	7.5	9.4
chr1.capped.1537	AT1G14071	0.54	0.82	1	0.9	1.48	0.78	2.22	1.9	1.7	0.33	1.05	0.43	1.93	2.78	2.54	3.6	2.26	3.1
chr1.capped.1538	.	2.04	1.01	1.38	0.8	0.95	0.29	2.08	1.5	0.89	0.33	0.63	0.65	2.7	2.23	2.41	2.81	1.59	3.1
chr1.capped.1539	AT1G14100	0	0	0.08	0	0	0.02	0	0.1	0	0.11	0	0.07	0	0	0	0	0	0
chr1.capped.154	AT1G02280	17	13.05	11.98	10.3	13.35	11.59	12.62	11.33	11.51	4.6	3.03	4.41	22.91	22.69	24.8	27.47	18.12	32.79
chr1.capped.1540	AT1G14130	1.16	1.69	2.8	6.45	6.75	8.78	0.37	0.1	0.32	3.18	9.89	3.57	0.52	2.01	0.49	4.32	1.39	1.62
chr1.capped.1541	AT1G14130	4.06	4.33	4.3	5.43	5.06	6.25	5.1	4.45	4.05	1.85	1.48	1.27	13.07	24.38	17.74	7.34	6.32	8.88
chr1.capped.1542	AT1G14140	4.72	3.98	4.89	2.71	3.28	2.09	7.79	6.61	7.86	2.86	2.73	1.68	5.67	7.8	7.37	13.55	6	7.15
chr1.capped.1543	AT1G14150	7.57	8.1	8.58	74.46	67.33	40.02	0.25	0.3	1.15	0.22	0.47	0.07	3.87	2	2.01	1.02	1.4	3.34
chr1.capped.1544	AT1G14170	0	0.14	0	0.4	0.14	0.07	0	0.1	0.25	0.11	0.07	0.15	0	0	0.14	0	0	0.36
chr1.capped.1545	AT1G14170	7.39	5.39	6.42	5.13	4.54	2.91	5.22	3.92	4.51	1.86	1.89	2.57	10.23	9.61	18.85	14.46	6.7	8.94
chr1.capped.1546	AT1G14180	2.76	3.85	3.29	2.21	1.54	0.33	1.9	2.71	3.36	1.21	0.56	0.66	3.36	3.45	5.65	10.97	3.87	2.63
chr1.capped.1547	.	12.29	4.59	6.78	0.1	0	0.02	3.49	0.9	0.08	19.12	19.52	28.81	0	0	0	0	0	0
chr1.capped.1548	AT1G14190	0.27	0.14	0.08	0	0	0	0	0	0	0	0	0	0.13	0	0	0.18	0	0.36
chr1.capped.1549	AT1G14205	1.33	1.22	1.37	3.02	3.02	1.13	0.41	0.6	0.65	0.22	0.21	0.37	1.16	1.56	1.41	1.91	2	2.27
chr1.capped.155	AT1G02290	3.05	2.1	2.99	1.6	1.97	1.25	3.54	3.2	3.57	1.1	0.84	1.23	3.09	3.44	3.25	7.74	2.39	4.32
chr1.capped.1550	AT1G14200	3.75	3.32	5.13	5.65	7.24	4.82	4.65	3.7	0.73	11.7	4.05	2.48	2.75	5.28	3.46	6.95	6.93	7.83
chr1.capped.1551	AT1G14210	9.56	6.88	9.61	8.97	8.56	5.2	28.12	21.26	18.23	8.87	11.93	9.37	2.67	3.08	3.66	4.88	1.63	3.66
chr1.capped.1552	AT1G14230	8.82	7.33	6.04	8.36	7.5	7.97	8.96	7.53	6.88	12.91	13.78	11.25	8	8.38	12.77	4.99	4.67	6.19
chr1.capped.1553	AT1G14250	0	0.07	0.08	2.42	1.67	0.16	0.08	0	0.08	0	0	0.07	0	0	0	0	0.39	0
chr1.capped.1554	AT1G14260	2.33	2.21	2.37	0.9	0.81	0.75	1.57	0.9	1.31	3.29	1.91	1.38	2.33	1.22	2.11	2.57	1.33	2.51
chr1.capped.1555	AT1G14260	0.9	1.34	1.85	0	0	0.02	0	0	0	3.73	4.52	1.33	0.26	0	0	0.75	0	0
chr1.capped.1556	AT1G14270	12.51	9.06	10.74	17.95	19.68	10.32	11.49	13.94	12.46	8.99	6.89	6.17	6.33	4.44	6.49	7.3	3.85	8.7
chr1.capped.1557	AT1G14280	14.98	15.58	21.95	11.71	12.11	11.65	25.57	43.76	42.54	9.07	5.37	5.15	1.04	0.22	1.28	0.88	1.72	3.23
chr1.capped.1558	AT1G14290	36.35	36.58	44.91	9.5	12.04	9.6	44.67	64.66	43.48	111.46	77.64	47.99	9.79	11.29	28.77	16.67	6.95	19.99
chr1.capped.1559	AT1G14300	9.51	7.49	8.16	6.76	6.7	3.57	6.46	8.63	7.48	2.2	2.06	2.44	7.22	8.89	11.37	15.59	7.3	16.16
chr1.capped.156	AT1G02300	3.23	2.24	2.87	14.54	15.09	7.82	5.8	4	4.75	2.85	2.03	1.22	3.88	6.45	5.36	5.96	4.64	7.75
chr1.capped.1560	AT1G14310	9.18	7.4	9.02	12.09	12.01	7.04	8.62	6.52	9.67	6.13	5.78	5.57	7.87	10.93	15.17	8.83	6.8	11.79
chr1.capped.1561	AT1G14320	545.67	425.53	444.47	227.15	209.97	138.94	272.4	251.11	327.7	273.61	229.06	271.56	302.26	250.18	336.95	787.2	321.67	539.97
chr1.capped.1562	AT1G14330	2.77	2.52	3.17	1.82	3.16	1.15	0.82	1.1	1.56	1.24	2.54	2.77	0.39	0.17	0.42	0.44	0.13	0
chr1.capped.1563	AT1G14330	22.9	19.68	22.5	18.28	14.04	11.07	15.74	17.02	20.86	14.43	14.96	17.77	2.85	2.45	11.47	1.53	4.27	5.85
chr1.capped.1565	AT1G14340	2.75	2.1	1.91	5.54	5.71	6.65	3.15	1.39	1.96	3.3	1.83	2.13	1.81	1.55	0.84	5.34	1.74	3.71
chr1.capped.1566	AT1G14345	7.76	7.67	5.81	30.43	30.79	12.76	7.06	5.31	6.42	2.31	2.88	1.46	3.1	2.44	2.26	7.12	4.01	5.71
chr1.capped.1567	AT1G14350	7.71	6.06	3.9	0.7	0.98	1.29	0.98	1	1.7	0.77	1.26	1.36	1.82	1.77	2.55	3.21	12.68	9.2
chr1.capped.1568	AT1G14350	1.17	0.88	0.69	0.7	0.34	0.41	0.08	0.1	0.24	0.33	0.21	0.65	0.91	0.66	0.98	0.43	1.18	1.08
chr1.capped.1569	AT1G14350	0.36	0.21	0.2	0.3	0.21	0.26	0.16	0.1	0.2	0.11	0	0.07	0.26	0	0.28	0.17	1.44	0.66
chr1.capped.157	AT1G02305	47.72	35.99	42.37	79.05	78.01	71.05	53.43	51.62	39.1	51.59	42.09	32.15	48.14	51.96	67.33	39.68	30.2	50.9
chr1.capped.1570	AT1G14350	2.33	3.34	3.13	1.8	1.69	0.96	0.4	0.3	1.38	1.21	0.7	1.96	0.91	0.67	1.12	3.4	3.18	2.99
chr1.capped.1571	AT1G14360	18.53	16.21	14.77	14.04	13.89	6.71	14.29	7.03	26.03	21.11	24.53	16.61	63.15	46.98	95.72	18.99	6.3	8.35
chr1.capped.1572	AT1G14370	0.63	1.02	1.08	4.15	3.88	3.73	0.08	0	0.08	0	0	0.07	0.13	0.33	0.57	0.2	0.13	0.12
chr1.capped.1573	AT1G05083	0.09	0	0.08	0	0	0.04	0	0.1	0	0	0	0	0.13	0	0	0	0	0.12
chr1.capped.1574	AT1G14380	0.63	0.29	0.62	1.5	1.09	0.63	0.4	0.1	0.73	0.11	0.14	0.07	0	0.11	0.56	0.79	0.66	0.6
chr1.capped.1575	AT1G14380	4.73	3.92	4.69	4.03	5.22	3.26	6.02	6.71	6.28	2.96	2.04	1.75	5.81	6.77	8.17	12.83	3.58	7.17
chr1.capped.1576	AT1G14400	68.54	65.49	68.82	67.09	75.09	63	110.58	91.03	79.91	55.08	61.78	50.29	80.1	98.84	109.58	113.66	63.79	84.71
chr1.capped.1577	AT1G14410	7.75	7.8	7.27	3.92	3.76	2.73	4.06	3.3	3.82	2.2	2.25	2.56	5.16	5.23	5.09	16.64	6.42	15.24
chr1.capped.1578	AT1G14420	69.36	87.58	81.28	0.1	0.13	1.07	0.66	23.61	1.06	357.02	196.88	167.55	0.52	0.44	33.45	14.84	0.26	0
chr1.capped.1579	AT1G14430	2.16	1.29	1.42	0.2	0.55	0.08	0.16	1.4	1.85	0.66	0.14	0.42	0.26	1	0.28	1.09	0.78	0.6
chr1.capped.158	AT1G02330	14.1	12.24	12.39	14.54	13.44	9.38	11.53	14.34	15.38	8.32	7.34	7.76	15.21	16.08	20.81	26.17	14.74	18.1
chr1.capped.1580	AT1G14440	0.67	0.34	0.39	0	0	0.05	0	0	0.08	0	0	0	0.04	0	0	2.36	0.53	0.84
chr1.capped.1581	AT1G14440	4.37	3.78	3.92	0.6	0.61	0.67	0.74	3.5	1.79	0.11	0.42	0.14	0.79	0.67	0.7	10.3	3.04	3.82
chr1.capped.1582	AT1G14450	160.18	123.18	154	139.86	148.03	102.67	132.53	125.65	150.06	181.27	196.17	152.09	231.43	262.62	396.04	109.17	94.85	107.65
chr1.capped.1583	AT1G14460	2.23	1.36	2.14	2.62	3.1	1.85	2.06	1.6	1.14	0.99	0.92	1.39	2.46	1.44	1.41	2.26	1.88	2.51
chr1.capped.1584	AT1G14460	1.26	1.56	1.36	0.3	0.28	0.26	1.72	2.1	1.53	0.44	0.35	0.35	1.17	3.1	2.81	0.48	1.72	2.04
chr1.capped.1585	AT1G14490	1.16	0.87	0.71	0.1	0.07	0.15	0.33	0.6	0.16	0	0.56	0.58	0.13	1.44	0.28	4.13	2.66	2.98
chr1.capped.1586	AT1G14510	18.58	15.11	16.45	14.93	15.02	13.67	24.61	17.42	15.81	11.71	8.94	9.62	16.25	18.51	21.76	27.13	18.67	32.05
chr1.capped.1587	AT1G14520	13.47	10.49	10.08	9.59	9.31	5.82	1.99	0.3	0.41	18.15	3.59	7.74	0.52	0.33	0.56	17.47	8.68	9.64
chr1.capped.1589	AT1G14530	1.69	1.48	1.09	0.3	0.28	0.39	1.07	0.5	0.56	5.7	4.65	2.13	0.39	0.22	0.42	1.19	0.13	0.36
chr1.capped.1590	AT1G14530	12.03	9.98	15.46	5.65	4.8	3.54	13.27	9.63	9.33	24.03	28.91	21.21	14.58	21.43	28.91	9.08	6.71	8.43
chr1.capped.1591	AT1G14560	14.35	14.88	20.46	5.03	6.08	4.36	10.64	9.91	8.42	47.57	43.59	23.44	6.06	4.89	11.76	9.44	2.65	3.81
chr1.capped.1592	AT1G14570	21.6	19.15	18.57	15.54	18.56	15.43	31.68	25.36	27.81	14.32	12.95	12.36	28.56	25.46	40.44	39.45	12.69	23.12
chr1.capped.1593	AT1G14580	0.27	0.67	0.39	1.81	2.37	0.76	0.04	0.2	0	0.11	0	0.07	0.13	0	0	0.33	0	0.24
chr1.capped.1594	AT1G14590	6.55	6.11	8	3.3	3.75	1.98	4.71	3.1	3.31	11.86	10.34	7.48	2.6	2.55	3.24	5.78	2.64	3.6
chr1.capped.1595	AT1G14600	1.35	1.9	0.71	0.7	0.76	0.88	0.82	0.8	1.05	0	0.21	0.65	0.52	0.11	0.14	2.19	2.37	2.99
chr1.capped.1596	AT1G14610	12.29	11.05	6.43	5.83	6.43	5.69	9.17	9.4	10.25	4.71	3.93	5.03	12.92	10.23	12.02	21.98	8.79	19.42
chr1.capped.1597	AT1G14620	10.35	9.83	6.51	3.83	4.48	3.26	7.96	5.5	7.11	2.3	2.31	3.09	12.89	14.86	18.12	30.72	14.05	22.73
chr1.capped.1598	AT1G14630	2.68	1.61	2.14	0.3	0.07	0.24	0	0	0.41	0	0.14	0.15	0	0	0.71	3.56	1.33	2.02
chr1.capped.1599	AT1G14640	3.48	2.14	2.15	0.81	1.14	0.89	1.01	0.9	0.8	5.91	2.68	4.42	1.41	0.78	1.41	1.7	1.2	1.31
chr1.capped.16	AT1G01110	0.36	0.4	0.31	0	0	0.02	0.25	0.7	1.15	0.33	0.21	0.07	0.26	0.11	0.28	0.35	0.13	0.12
chr1.capped.1600	AT1G14650	7.64	7.35	6.58	5.28	7.89	6.03	9.83	7.06	8.83	5.07	3.14	3.89	7.35	8.79	11.88	20.02	8.27	12.32
chr1.capped.1601	AT1G14660	1.25	1.15	0.94	1.4	1	0.58	0.66	0.5	1.21	0.55	0.35	0.95	1.03	0.99	2.12	3.07	1.33	2.26
chr1.capped.1602	AT1G14670	34.28	26.35	29.25	11.1	12.37	10.45	53.75	36.56	41.11	26.34	34.01	29.67	39.36	37.46	62.67	32.54	13.69	20.8
chr1.capped.1603	AT1G14680	2.15	1.22	1.01	1.1	0.68	0.76	1.05	1	1.21	1.32	1.68	1.3	1.3	2.46	1.42	2.89	2.68	1.92
chr1.capped.1604	AT1G14685	10.61	11.08	8.75	5.88	8.12	5.14	9.91	9.2	10.58	8.36	8.7	6.5	12.52	14.11	18.51	20.15	9.76	17.44
chr1.capped.1605	AT1G14685	6.85	7.19	7.41	8.83	8.55	4.3	15.73	14.64	13.79	6.54	6.65	4.97	8.89	10.11	11.69	9.86	4.65	7.15
chr1.capped.1606	AT1G14686	0.27	0.14	0.46	0.2	0.21	0.19	0.32	0.5	0.89	0.22	0.07	0.21	0.13	0.44	0	0.04	0.13	0.12
chr1.capped.1607	AT1G14687	3.39	2.85	3.64	1.51	2.86	2.4	0.08	0.8	1.24	0.22	0.28	0.28	1.68	0.77	1.98	6.42	6.38	5.5
chr1.capped.1608	AT1G14690	0.32	0.3	0.39	0.12	0.27	0.06	0.37	0.1	0.16	0.16	0	0	0	0.33	0	1.11	0.39	1.2
chr1.capped.1609	AT1G14690	6.7	7.12	5.37	6.64	7.32	5.54	5.13	3	2.98	1.65	1.54	1.73	4.4	3.38	3.8	18.62	8.63	14.18
chr1.capped.1610	AT1G14700	0.45	0.48	0.69	0	0.07	0	0	0	0	0.55	0.42	0.14	0.13	0.11	0.14	0.18	0	0
chr1.capped.1611	AT1G14710	11.52	9.86	8.28	1.9	3.02	1.73	6.42	5.82	9.85	2.74	2.66	3.38	8.96	7.79	17.95	6.87	3.45	5.51
chr1.capped.1612	AT1G14720	8.4	7.6	4.65	5.98	7.15	4.6	0.66	0.5	1.28	1.65	1.05	1.61	2.32	1.66	1.68	30.34	9.15	11.33
chr1.capped.1613	AT1G14730	1.25	1.94	1.81	2.22	1.82	0.53	2.72	1.63	1.63	0.99	1.05	0.87	0.52	0.44	0.28	4.49	1.47	1.2
chr1.capped.1614	AT1G14740	8.66	10.36	8.87	4.51	9.95	6.56	9.57	6.65	7.88	4.4	4.99	4.91	11.87	11.92	13.87	19.25	8.05	14.29
chr1.capped.1615	AT1G14750	1.07	0.34	0.64	0.2	0.4	0.12	0.42	0.1	0.32	0	0.14	0.07	4.65	2.91	10.19	1	0.93	0.12
chr1.capped.1616	AT1G14755	6.12	6.57	5.48	0.3	0.28	0.66	1.65	2	0.8	16.78	11.07	10.86	0.39	0.22	1.4	2.44	3.3	3.84
chr1.capped.1617	AT1G14760	0.54	0.07	0.36	0.1	0.4	0.08	0	0.2	0.16	1.21	0.14	0.83	0.26	0	0	0.02	0.13	0
chr1.capped.1618	AT1G14770	6.36	4.2	3.71	1.5	2.22	1.56	2.67	2.54	2.65	1.54	1.75	1.74	4.14	3.47	6.8	6.04	3.38	6.49
chr1.capped.1619	AT1G14790	2.6	2.12	2.08	0.8	1.43	1.08	2.06	0.6	1.05	0.77	0.49	0.58	1.81	1.43	2.53	6.54	2.24	3
chr1.capped.162	AT1G02335	14.51	11.21	16.45	10.72	11.42	10.29	30.98	22.9	26.29	5.35	6.44	5.47	7.21	0	5.09	3.36	1.34	3.68
chr1.capped.1621	AT1G14810	9.82	7.49	6.05	6.54	9.16	6.94	8.98	4.71	5.11	2.13	3.23	2.66	7.43	5.44	3.69	15.21	7.55	17.05
chr1.capped.1622	AT1G14820	24.68	18.57	21.25	11.67	14.57	7.29	27.83	41.13	34.89	8.14	6.24	5.47	99.68	114.03	140.4	33.54	17.06	24.3
chr1.capped.1624	AT1G14830	21.66	17.96	20.39	8.76	7.77	7.21	24.25	17.75	22.77	23.06	22.19	21.88	14.54	17.53	34.86	19.53	7.63	11.33
chr1.capped.1625	AT1G14840	4.46	3.21	3.65	1.44	1.69	0.35	1.59	2.13	2.9	0.45	0.21	0.36	2.91	1.25	1.15	7.93	3.91	6.02
chr1.capped.1626	AT1G14850	4.57	2.99	2.44	1.1	1.84	1.33	3.08	2	2.67	1.21	1.47	1.23	3.01	2.66	4.1	6.25	1.59	5.26
chr1.capped.1627	AT1G14860	2.78	2.17	5.47	12.62	14.17	12.49	2.21	1.7	1.46	6.14	19.88	13.01	28.6	38.53	38.68	2.08	0.78	1.69
chr1.capped.1629	AT1G14870	16.4	16.63	16.59	4.15	5.2	10.66	4.39	3.82	3.76	1.87	1.77	0.75	6.14	4.17	8.51	20.02	3.95	13.01
chr1.capped.163	AT1G02340	0.36	0.07	0.08	0	0	0.02	0	0.2	0.16	0	0.14	0	0	0	0	0	0	0.12
chr1.capped.1630	AT1G14890	22.44	18.37	13.1	27.08	30.03	16.96	16.69	13.05	15.06	5.01	3.18	1.69	59.77	61.04	77.72	118.37	60.19	97.4
chr1.capped.1631	AT1G14890	0.18	0.14	0.24	0	0.07	0.04	0.16	0.2	0.24	0	0	0	1.42	2.01	0.42	4.96	2.4	2.02
chr1.capped.1632	AT1G14900	33.85	37.07	17.55	5.95	6.76	6.03	17.25	19.66	16.93	4.92	8.12	5.38	40.14	50.06	43.94	170.93	73.17	87.93
chr1.capped.1633	AT1G14910	6.87	6.04	5.12	3.13	4.15	4.18	11.85	9.64	9.38	3.51	4.51	3.54	15.86	15.06	33.46	11.95	5.75	10.95
chr1.capped.1634	AT1G14920	7.86	6.48	7.08	7.07	6.66	5.05	13.83	13.14	11.47	1.83	1.84	1.48	4.51	2.55	3.81	19.38	8.71	11.12
chr1.capped.1635	AT1G14920	1.08	0.67	1.32	0.2	0.28	0.12	1.66	1.1	1.62	1.87	0.56	0.96	0.52	0.44	0.14	0.72	0.13	0.48
chr1.capped.1636	.	0.36	0.34	0.24	0.4	0.34	0.36	0.08	0.5	0.24	0.11	0.21	0.29	0.39	0.33	0.42	0.23	0.52	0.48
chr1.capped.1637	AT1G14970	4.22	3.6	3.4	0.4	0.41	0.19	1.06	2.1	1.46	10.64	7.49	7.31	0.91	0.89	2.68	3.32	1.58	1.67
chr1.capped.1638	AT1G14980	101.55	85.63	91.66	63.26	67.44	30.06	65.19	56.82	85.78	48.19	31.68	36.02	105.46	94	173.55	167.72	90.16	86.01
chr1.capped.1639	AT1G14990	10.81	11.92	13.41	14.95	16.58	10.11	12.22	12.52	15.25	8.34	8.46	8.77	13.67	14.42	16.85	16.87	6.28	9.66
chr1.capped.164	AT1G02340	6.41	5.99	7.92	0.5	0.94	0.99	9.62	19.88	18.12	2.41	1.91	1.99	0.13	0.67	0.56	1.87	1.74	2.38
chr1.capped.1640	AT1G15000	2.96	2.88	1.92	4.42	6.7	2.31	1.06	0.8	1.46	0.44	0.35	0.21	1.17	1.1	0.85	10.19	3.6	6.94
chr1.capped.1642	AT1G15002	1.25	1.21	1	1.01	0.34	0.49	0.99	1.2	2.54	0.99	0.99	0.8	1.03	0.56	1.27	0.34	0.8	0.96
chr1.capped.1643	AT1G15010	24.74	26.43	65.13	155.96	166.5	129.35	33.15	5.62	34.7	31.99	8.21	3.83	1.16	1.12	14.31	2.44	3.21	8.09
chr1.capped.1644	AT1G15020	6.91	5.45	5.23	6.52	8.22	5.7	8.66	8.26	5.93	12.36	10.42	11.11	11.4	9.82	13.46	9.61	5.74	11.19
chr1.capped.1646	AT1G15030	2.46	3.52	3.14	4.72	8.42	6.28	3.51	3.66	4.47	1.06	1.26	1.12	4.1	5.87	3.92	7.76	2.64	4.77
chr1.capped.1647	AT1G15040	9.36	4.91	4.73	1.21	1.74	2.52	53.28	39.58	19.77	6.58	20.07	2.51	154.56	282.91	469.68	10.76	5.5	12.24
chr1.capped.1648	AT1G15060	3.57	3.32	3.37	3.02	2.84	1.93	3.05	2.41	1.96	3.95	7.75	6.3	4	4.9	5.38	8.96	2.39	5.25
chr1.capped.1649	AT1G15080	0.9	0.97	0.77	1.1	0.54	0.7	0.4	0.2	0.4	0	0.14	0.36	0	0.66	0	3.26	1.85	2.28
chr1.capped.165	AT1G02350	2.86	2.22	1.6	1.21	1.22	0.63	2.3	2.3	1.31	1.65	2.05	1.45	3.74	3.12	3.53	3.46	2.67	2.62
chr1.capped.1650	AT1G15085	2.32	2.16	1.53	0.3	0.37	0.16	0.08	0.1	0.4	0	0	0.29	0	0.11	0.14	3.29	1.87	0.72
chr1.capped.1651	AT1G15100	1.17	0.61	1.74	0.6	0.68	0.97	1.88	1.6	2.24	0.22	1.33	1.23	0.26	0.44	0.14	0.68	1.97	1.56
chr1.capped.1652	AT1G15100	4.72	3.92	5.05	5.58	7.15	6.29	9.17	9.54	8.16	6.57	7.75	5.94	3	1.9	1.98	5.91	2.16	3.77
chr1.capped.1653	AT1G15110	1.94	2.5	2.38	1.4	1.59	1.15	5.73	4.9	4.41	1.32	3.51	2.1	2.21	2.99	2.26	2.67	1.32	2.76
chr1.capped.1654	AT1G15110	1.69	1.49	2.29	2.72	3.81	2.29	6.29	3.21	3.21	1.98	3.67	4	0.52	0.22	0	1.04	0.65	0
chr1.capped.1655	AT1G15110	0.49	0.21	0.59	0.3	0.75	0.22	1	0.8	0.56	0.11	0.07	0.56	0.13	0.17	0.14	0.42	0.26	0.6
chr1.capped.1656	AT1G15120	115.92	101.13	123.28	102.83	135.8	90.93	122.83	109.7	123.85	118.33	125.41	110.04	162.11	189.79	206.9	154.51	68.38	83.25
chr1.capped.1657	AT1G15120	1.26	0.96	1.31	2.3	2.43	1.65	1.98	0.9	1.86	0.77	0.91	0.72	1.16	1.12	2.68	0.25	0.13	0.12
chr1.capped.1658	AT1G15130	12.94	9.47	9.68	8.57	7.96	7.17	16.61	12.44	12.33	7.89	10.04	9	16.22	12.97	28.33	11.84	5.35	12.62
chr1.capped.166	.	46.9	47.3	57.87	7.97	7.63	5.33	58.57	47.89	67.69	29.19	12.29	16.74	23.57	27.07	106.04	8.8	8.41	7.74
chr1.capped.1660	AT1G15140	19.14	19.41	16.78	33.47	36.24	17.62	19.76	18.14	21.05	16.34	17.22	19.93	13.7	9.77	16.35	12.79	7.16	10.38
chr1.capped.1661	AT1G15165	1.9	1.77	1.09	1.82	3.26	1.02	3.06	2.6	2.29	0.99	0.63	0.87	1.16	1.58	0.7	3.89	1.46	1.79
chr1.capped.1662	AT1G15170	2.25	1.49	1.63	1.93	1.71	1.6	0.4	0.9	0.56	2.59	2.24	2.22	0.78	0.55	0.71	0.5	0.26	0.48
chr1.capped.1663	AT1G15175	1.35	2.1	1.77	3.12	3.77	1.99	8.28	5.3	4.16	0.44	1.12	0.36	1.81	5.45	0.85	1.34	2.25	1.56
chr1.capped.1664	AT1G15180	1.26	0.95	0.47	3.9	3.24	2.23	4.9	3.49	1.44	0.38	0.54	0.29	0.91	0.67	0.28	1.22	0.52	2.63
chr1.capped.1665	AT1G15190	0.9	0.21	0.63	0.1	0	0.15	0.16	0.4	0.24	0	0	0.14	0	0.11	0.14	0.31	0.13	0.12
chr1.capped.1666	AT1G15190	0.09	0.2	0.24	0.1	0.07	0.04	0.4	0.1	0.16	0.11	0.07	0.07	0.13	0.22	0	0.37	0.13	0.24
chr1.capped.1667	AT1G15200	16.4	14.41	13.79	14.74	11.13	8.13	15.47	14.93	15.93	6.25	5.57	7.74	17.65	18.67	19.25	32.64	18.21	31.51
chr1.capped.1668	AT1G15215	2.5	2.82	3.05	1.87	2.6	2.52	4.79	4.31	3.52	1.54	0.84	1.24	4.77	5.15	4.96	11.11	5.36	6.32
chr1.capped.1669	AT1G15220	3.67	2.83	2.78	4.22	4.45	2.78	6.24	4.8	5.62	1.87	2.38	1.54	3.49	5.66	6.2	8.82	4	5.01
chr1.capped.167	AT1G02370	4.82	3.23	2.36	2	1.94	0.91	1.24	1.5	1.62	0.66	0.42	0.65	3.35	5.12	5.08	7.4	3.18	6.68
chr1.capped.1670	AT1G15230	17.52	14.66	15.86	19.79	22.55	14.48	19.08	16.97	11.19	25.46	19.66	13.59	25.09	35.78	27.36	42.08	27.94	45.76
chr1.capped.1671	AT1G15240	7.23	5.12	4.6	5.84	6.29	3.97	7.37	6.32	7.32	3.94	4.37	3.87	4.39	5.24	8.06	8.94	3.99	6.91
chr1.capped.1672	AT1G15250	20.85	18.71	17.65	7.43	9.53	4.03	28.91	20.38	36.51	4.51	4.56	6.05	15.99	15.97	11.03	39.28	23.05	27.62
chr1.capped.1673	AT1G15260	171.89	151.31	259.87	57.43	57.72	30.41	924.75	778.87	982.85	50.47	78.7	37.65	76.89	51.97	56.26	19.5	21.71	27.7
chr1.capped.1674	AT1G15270	268.51	235.77	309.7	349.83	379.31	272.95	282.14	298.54	341.9	260.07	221.42	192.45	359.47	426.56	633.24	240.02	173	195.87
chr1.capped.1675	AT1G15280	7.42	11	7.55	11.89	10.71	9.11	13.29	13.9	12.07	4.61	4.63	5.67	10.18	10.36	12.31	26.25	16.75	19.76
chr1.capped.1678	AT1G15290	1.53	1.67	1.73	1.71	3.08	1.69	1.24	1.2	1.13	0.23	0.21	0.36	1.56	0.79	1.4	1.77	1.05	2.04
chr1.capped.1679	.	0	0	0	0.1	0	0.05	0.25	0.1	0.08	0	0	0.14	0.13	0.11	0.14	0	0	0
chr1.capped.168	AT1G02380	1.69	1.61	1.69	0.4	0.47	0.35	0.92	1.21	2.05	1.2	0.71	0.66	0.13	0.22	0.56	1.11	0.53	1.19
chr1.capped.1680	.	1.17	1.15	0.72	0.3	0.75	0.31	0.27	0.1	0.4	1.21	1.62	2.79	0.13	0.33	1.41	2.38	1.3	1.32
chr1.capped.1681	AT1G15310	7.59	5.68	6.68	1.51	2.47	1.35	0.74	2.3	1.46	11.61	13.99	15.26	4.13	2.77	6.92	6.5	2.11	2.86
chr1.capped.1682	AT1G15320	0.09	0.21	0.16	0	0	0	0	0	0	0.55	0.56	0.22	0	0	0	0.55	0.4	0.12
chr1.capped.1683	AT1G15340	50.36	43.45	42.86	46.3	43.95	36.44	80.41	65.23	65.2	18.18	20.54	15.54	36.85	35.61	51	65.61	49.41	66.28
chr1.capped.1684	AT1G15350	42.19	37.86	38.71	2.62	2.28	2.69	16.42	18.17	8.86	138.81	98.84	86.55	0.65	1.45	8.64	9.6	3.21	9.53
chr1.capped.1685	.	0.27	0.74	1.76	0	0	0	0	0	0.08	0.66	7.63	10.2	0	0	0	0.1	0	0
chr1.capped.1686	AT1G15360	22.71	25.62	25.78	1.51	2.68	0.31	155.13	63.77	112.56	27.73	30.84	28.27	1.02	3.23	2.54	0.52	0.66	1.2
chr1.capped.1687	AT1G15360	2.14	1.69	2.97	0	0	0	7.97	4.01	8.83	2.3	2.12	1.77	0.39	0.11	0	0.08	0	0
chr1.capped.1688	AT1G15360	40.39	48.34	49.8	1.71	1.9	0.27	139.61	100.63	194.44	22.07	27.39	34.51	10.03	15.29	4.67	1.9	1.34	2.15
chr1.capped.169	AT1G02390	0	0.13	0.16	0.7	0.4	0.41	0	0	0	0	0	0	0.13	0	0.42	0	0	0
chr1.capped.1690	AT1G15360	0.18	0.14	0.16	0.1	0	0	0.58	0.8	0.98	0	0.64	0.37	0	0	0	0	0	0.12
chr1.capped.1691	AT1G15360	0.36	0.21	0.32	0.2	0	0	0.08	0.5	0.32	0.22	0.28	0.14	0	0.11	0	0.02	0.13	0
chr1.capped.1692	AT1G15370	0.63	0.28	0.72	0.2	0.34	0.29	1.72	1.4	2.52	0.88	0.77	0.22	0.39	0.44	0.56	0.18	0.52	0.48
chr1.capped.1693	AT1G15370	46.14	39.88	50	38.31	40.07	22.4	55	49.09	67.73	41.78	39.5	40.08	43.23	51.42	75.29	71.78	52.77	52.52
chr1.capped.1694	AT1G15380	31.69	29.01	23.77	5.35	6.95	8.89	73.88	30.73	7.22	138.15	92.14	57.02	14.29	26.37	16.72	54.35	53.63	90.18
chr1.capped.1695	AT1G15380	0.72	0.76	0.95	0.1	0.07	0.06	2.21	0.2	0.16	0.11	0.07	0.28	1.3	3.1	1.12	4.55	3.56	5.87
chr1.capped.1696	AT1G15385	9	6.41	5.77	0	0	0.04	0.16	2.61	0	41.89	13.78	10.53	0.26	2.54	2.11	3.89	3.92	3.01
chr1.capped.1697	AT1G15390	13.44	9.89	10.03	17	14.62	8.61	13.81	8.84	10.8	6.35	6.16	4.88	11.2	11.19	9.22	16.65	13.16	23.88
chr1.capped.1698	AT1G15400	26.4	25.15	26.31	35.44	39.22	30.83	45	35.45	27.96	31.15	28.51	17.68	40.59	60.27	76.88	55.89	29.77	39.83
chr1.capped.1699	AT1G15410	0.18	0.37	0.08	0.6	0.48	0.21	0.16	0.4	0.24	0	0.28	0	0.26	0.33	0.28	1.49	1.19	1.79
chr1.capped.17	AT1G01120	47.33	45.32	47.5	6.17	8.55	10.43	0.34	4.72	6.6	19	4.73	11.77	1.16	1.23	29.22	5.28	4.83	9.39
chr1.capped.170	AT1G02400	3.75	2.76	7.76	1.82	1.28	6.79	0.25	0.3	0.48	5.8	0.35	0.07	1.16	0.78	15.74	0.66	0.66	0.95
chr1.capped.1700	AT1G15410	3.13	2.5	1.92	0.9	1	0.33	2.89	6.01	5.81	1.76	1.86	1.67	4.64	3.45	5.23	1.95	1.32	1.68
chr1.capped.1702	AT1G15410	0.45	0.4	0.61	0.51	0.68	0.22	1.24	1.3	1.89	0.33	0.49	0.51	1.55	1.79	7.23	0.36	0.13	0.24
chr1.capped.1703	AT1G15410	0.18	0.35	0.16	2.83	1.87	0.8	0.32	0.43	0.64	0.22	0.14	0.14	0.52	0.11	0.14	0.04	0	0.12
chr1.capped.1704	AT1G15410	0.09	0.07	0.08	0.2	0.47	0.06	0.08	0.1	0.08	0	0	0.07	0.13	0.22	0	0	0	0
chr1.capped.1705	AT1G15415	252.94	203.47	300.82	1	1.27	2.54	21.37	17.77	6.08	651.45	1140.49	836.79	0.65	0.89	9.77	47.02	0.66	0.36
chr1.capped.1706	AT1G15420	13.89	11.84	9.95	8.31	8.28	4.74	10.1	5.46	8.83	5.97	3.13	3.63	7.04	10.54	12.38	33.48	13.85	19.5
chr1.capped.1707	AT1G15430	13.36	15.22	17.75	5.35	5.48	7.69	8.37	8.53	7.14	41.94	30.73	26.27	4.85	6.15	9.49	8.48	2.81	4.76
chr1.capped.1708	AT1G15440	2.13	2.43	1.24	1.82	1.43	0.84	0.9	1.3	1.7	0.44	0.42	0.44	3.23	1.66	1.98	6.16	2.54	3.34
chr1.capped.1709	AT1G15460	9.03	7.55	5.39	0	0	0.02	0.33	0	0.16	8.01	25.77	35.99	0	0	0	0.73	0.13	0.48
chr1.capped.171	AT1G02410	17.12	11.78	16.98	10.9	8.89	6.27	16.75	12.63	13.47	12.8	11.95	9.64	21.75	23.1	36.57	18.34	12.08	25.21
chr1.capped.1710	AT1G15460	0.81	0.96	0.99	0.1	0.13	0	0.08	0	0.08	0.99	2.47	3.09	0.13	0	0	0.29	0	0.24
chr1.capped.1711	AT1G15460	0	0	0	0	0	0	0	0	0	0	0	0.07	0	0	0	0	0	0
chr1.capped.1712	AT1G15470	18.47	18.07	13.44	6.15	5.65	4.16	4.12	5.6	5.28	36.8	41.42	31.64	8.27	7.58	13.59	10.72	4.11	7.03
chr1.capped.1713	AT1G15470	0.03	0.02	0.03	0	0	0	0.03	0	0	0	0	0.05	0.04	0	0	0.02	0	0
chr1.capped.1714	AT1G15480	1.17	2.25	1.52	0.6	0.95	0.48	0.91	0.9	1.54	0.33	0.28	0.51	2.58	3.45	2.25	7.48	2.66	4.77
chr1.capped.1715	AT1G15490	3.86	3.31	3.41	1.1	1.24	0.85	3.24	3.1	2.94	11.09	8.57	4.58	3.63	5.44	11.29	3.19	3.05	2.52
chr1.capped.1716	.	0.09	0	0.08	0.1	0	0.02	0.33	0	0.4	0.11	0	0	0.39	0	0	0	0	0
chr1.capped.1717	AT1G15500	12.05	11.11	8.26	6.45	6.95	4.1	11.64	6.81	7.09	5.17	3.85	4.11	9.93	9.62	12.78	33.61	8.7	21.34
chr1.capped.1718	AT1G15510	1.07	1.09	0.62	1.8	1.43	0.64	0.57	0.4	0.49	0.22	0.28	0.14	0.9	1.11	1.13	1.67	0.79	1.56
chr1.capped.1719	AT1G15520	1.62	1.09	0.46	0.8	0.61	0.56	0.91	0.6	0.56	0.99	0.91	0.87	0.52	0.22	1.13	1.74	0.26	1.44
chr1.capped.172	AT1G02420	0.63	1.14	0.32	1.2	1.02	0.45	0.83	0.4	0.73	0.67	0.35	0.72	0.78	1	0.99	2.5	0.65	0.96
chr1.capped.1720	AT1G15530	1.34	1.83	1.4	5.04	4.16	3.81	2.8	2.5	2.13	0.99	1.19	0.8	2.58	1.67	2.12	4.53	3.47	6.23
chr1.capped.1721	AT1G15530	0.09	0.21	0	0.2	0.07	0.09	0	0.3	0.16	0	0	0	0.13	0.33	0	0.41	0.53	0.84
chr1.capped.1722	AT1G15550	0.36	0.54	0.15	0.2	0.13	0.14	0	0	0.08	0.22	0.07	0.22	0	0.22	0	0.68	0.27	0.48
chr1.capped.1723	.	1.8	2.91	3.1	0	0	0.04	0	0.9	0	16.18	11.08	9.39	0	0	0.42	0.1	0	0
chr1.capped.1724	AT1G15570	3.3	2.49	1.47	0.9	0.21	0.2	1.5	0.8	0.88	0.11	0.21	0.28	1.56	1.77	1.27	16.25	7.49	7.85
chr1.capped.1725	AT1G15580	1.07	0.48	1.07	0.1	0	0	0.08	0	0.08	0.66	0.07	0.07	0.39	0.11	0	0.09	0	0
chr1.capped.1726	AT1G15660	6.52	4.97	2.98	1.32	2.15	2.32	1.66	3.32	2.56	1.33	0.91	0.88	3.23	3.22	3.98	10.6	3.79	6.55
chr1.capped.1727	AT1G15670	17.19	20.45	22.67	38.1	52.75	52.49	19.75	12.85	11.52	28.95	40.05	20.38	11.97	10.38	4.95	22.73	10.6	17.49
chr1.capped.1728	AT1G15690	51.19	50.19	41.81	37.28	40.42	34.26	110.61	59.87	56.5	39.44	46.14	38.5	87.85	130.73	104.49	106.1	52.25	103.51
chr1.capped.1729	AT1G15700	2.95	1.82	2.82	1.82	1.48	1.18	3.8	3.3	2.51	1.32	0.84	1.39	2.84	3.78	5.09	8.76	4.81	5.25
chr1.capped.1730	AT1G15710	4.55	4.98	2.85	4.01	3.16	1.83	2.84	3.6	2.59	2.86	1.89	1.83	4.27	3.89	6.91	8.02	4.83	5.72
chr1.capped.1733	AT1G15720	0.81	1.31	0.48	0.6	0.68	0.43	1.31	0.7	0.8	0.22	0.14	0.29	0.78	1.32	1.83	4.88	2.25	2.88
chr1.capped.1736	AT1G15730	5.1	5.33	5.04	7.66	9.97	5.99	5.91	5	6.47	1.76	1.19	1.98	4.53	4.23	3.97	7.54	2.26	3.93
chr1.capped.1737	AT1G15740	8.46	5.56	6.31	21.02	20.54	21.89	18.79	11.94	7.7	6.03	5.94	4.58	18.65	18.67	14.6	22.75	13.3	33.29
chr1.capped.1739	AT1G15750	2.42	1.41	2.16	0.6	0.55	0.34	0.98	1.2	1.38	1.65	0.52	2.26	1.17	0.44	0.42	2.8	1.04	1.52
chr1.capped.174	AT1G02450	3.84	4.34	3.13	0.3	0.48	0.09	3.06	1.3	1.15	1.86	0.77	0.94	4.77	3.68	8.5	4.35	2.67	1.31
chr1.capped.1740	AT1G15750	5.55	3.37	1.57	4.36	4.38	4.03	2.18	2.24	1.84	3.96	3.69	3.1	2.47	2.44	5.87	5.14	2.65	8.03
chr1.capped.1741	AT1G15760	0.71	0.27	0.91	0.2	0	0	0	0	0.04	0.11	0	0.22	0.13	0	0	1.45	0.8	0.12
chr1.capped.1742	AT1G15772	1.26	1.23	1.62	0	0	0	0.19	0.4	0	3.18	3.8	3.28	0	0	0.14	0.61	0.53	0.24
chr1.capped.1743	AT1G15780	0.36	0.07	0	0.3	0.48	0.17	0.33	0.6	0.49	0.11	0	0	0.13	0.11	0.14	0.28	0	0.72
chr1.capped.1744	AT1G15780	1.17	1.29	1.16	1.01	1.49	0.87	1.31	0.3	0.98	1.65	2.18	1.28	1.81	1.11	1.98	1.21	0.66	1.67
chr1.capped.1745	AT1G15790	1.53	1.28	0.55	1.31	2.14	1.47	0.66	0.7	0.24	0.99	2.32	1.9	0.39	0	0.42	1.68	1.05	0.72
chr1.capped.1746	AT1G15800	8.73	6.81	5.81	5.96	4.88	5.15	10.63	7.84	8.33	9.61	8.69	5.91	10.56	12.85	13.1	19.64	13.02	21.99
chr1.capped.1747	AT1G15810	5.16	3.69	4.82	4.13	3.42	1.78	4.14	5.2	4.52	2.09	1.82	1.85	5.42	4	4.44	10.69	3.07	7.02
chr1.capped.1748	AT1G15830	0.09	0.28	0.48	0.3	0.42	0.34	0.57	0.5	0.08	0	0.28	0.14	0.13	0.11	0	0.1	1.17	0.72
chr1.capped.1749	AT1G15820	161.56	149.63	153.78	446.64	503.08	170.22	201.97	112.1	176.52	79.6	58.18	39.36	132	95.22	101.37	168.62	77.79	124.19
chr1.capped.175	AT1G02460	0.36	0.14	0.16	4.44	5.61	3.8	0.33	0.5	0.56	1.32	1.12	0.51	0	0	0.14	0.57	0.39	0.6
chr1.capped.1751	AT1G15860	17.48	18.3	21.73	21.2	23.85	17.8	21.97	15.67	17.95	15.72	17.45	13.33	21.24	28.4	36.71	20.96	13.82	21.64
chr1.capped.1752	AT1G15870	1.26	0.68	0.78	0.5	0.34	0.16	0.33	0.4	0.8	0.44	0.28	0.29	1.17	1	1.69	3.3	1.87	0.72
chr1.capped.1753	AT1G15885	5.19	4.79	4.15	3.82	4.27	3.56	6.85	5.9	3.89	1.65	1.72	1.44	5.69	9.44	5.8	7.43	8.28	14.56
chr1.capped.1754	AT1G15880	24.32	23.53	23.29	12.24	13.9	13.62	27.48	23.79	17.75	49.18	52.33	35.94	19.06	22.35	21.39	26.87	13.4	23.67
chr1.capped.1755	AT1G15885	0	0	0	0	0.2	0.05	0	0	0	0	0	0	0.13	0	0	0.04	0.13	0.12
chr1.capped.1756	AT1G15900	0.63	0.76	1	0.8	0.63	0.72	1.49	1.2	0.56	0.22	0.56	0.35	0.65	0.66	0.56	1.61	1.45	2.16
chr1.capped.1757	AT1G15910	6.53	5.52	3.3	1.8	1.08	1.29	6.31	5.31	4.4	0.77	1.81	1.32	8.06	8.2	6.55	20.46	8.66	16.1
chr1.capped.1758	AT1G15920	25.23	22.03	27.54	8.77	8.37	6.9	14.09	12.32	9.6	65.14	61.39	43.17	13.03	17.18	25.5	10.1	11.92	16.77
chr1.capped.1759	AT1G15920	5.93	7.97	5.45	1.23	1.28	1.12	2.45	2.44	1.77	19.24	13.67	11.38	1.17	1.01	2.67	3.2	1.08	1.46
chr1.capped.1760	AT1G15930	214.76	190.1	158.62	84.22	82.49	57.03	176.56	144.07	169.08	90.42	78.81	77.49	182.57	202.77	152.31	529.86	284.3	465.25
chr1.capped.1761	AT1G15940	8.22	7.47	5.09	1.7	2.47	2.08	7.38	4.71	4.92	4.84	3.95	4.2	5.42	5.36	5.65	12.13	6.81	12.26
chr1.capped.1763	AT1G15950	9.25	5.8	5.03	8.19	13.51	8.57	2.65	1.3	4.11	3.28	1.48	1.54	6.95	4.14	4.66	23.03	7.91	10.11
chr1.capped.1764	AT1G15950	0.09	0.21	0.16	0.2	0	0.04	0	0.2	0.08	0	0	0	0.26	0.88	4.78	0.27	0.13	0.12
chr1.capped.1766	AT1G15960	0.45	0.27	0.23	2.22	2.2	1.27	1.4	1.4	0.88	0.88	0.35	0.36	4.64	3.24	2.41	1.21	0.4	1.08
chr1.capped.1767	AT1G15970	1.51	2.75	2.97	1.71	2.14	0.53	0.24	0.2	0.9	0.66	0.28	0.28	0.78	0.11	0.42	0.75	0.79	0.6
chr1.capped.1768	AT1G15970	10.07	5.99	7.54	4.93	5.97	3.16	8.22	8.03	7.72	4.07	3.24	2.71	10.2	7.74	11.32	8.41	9.63	13.1
chr1.capped.1769	AT1G15980	1.94	1.39	1.4	7.64	7.14	3.27	0.67	0.61	0.25	0.23	0.22	0.37	0.93	0.22	0.84	0.33	0.26	0.62
chr1.capped.177	AT1G02470	10.63	11.94	17.78	28.67	43.45	45.23	14.6	21.87	22.34	16.31	12.35	8.38	17.64	13.94	19.37	1.66	1.32	1.56
chr1.capped.1774	AT1G16000	41.83	27.83	38.1	23.56	22.09	7.56	43.48	39.46	49.91	22.3	17.74	14.85	50.42	55.12	76.59	39.86	32.75	37.21
chr1.capped.1775	AT1G16010	20.66	15.82	14.83	27.48	25.22	15.36	22.42	13.04	20	16.19	13.73	13.6	14.41	13.17	27.5	17.99	9.12	15.69
chr1.capped.1776	AT1G16020	4.03	4.38	3.83	3.72	5.34	1.67	3.73	2.5	4.82	2.09	1.55	2.2	4.89	3.68	6.78	6.5	2.8	4.53
chr1.capped.1777	AT1G16022	1.43	1.27	0.68	0.71	1	0.51	1.9	1.2	1.32	0.77	0.71	1.41	0	0	0.14	2.06	1.07	0.72
chr1.capped.1778	AT1G16030	1.07	1.23	0.84	0.7	1.41	0.69	1.5	0.6	0.57	0.66	0.35	0.52	0.91	1.23	1.7	1.26	2.02	1.78
chr1.capped.1779	AT1G16040	12.13	9.06	8.38	6.13	6.45	6.93	8.31	6.73	7.94	6.03	6.13	5.88	10.31	12.06	12.47	14.44	10.32	12.64
chr1.capped.178	AT1G02475	12.12	10.81	13.04	69.82	80.65	64.4	16.83	12.84	13.27	6.91	7	5.23	20.36	21.46	23.51	12.91	10.31	13.45
chr1.capped.1780	AT1G16060	10.29	6.49	6.49	0	0.13	0.14	2.51	8.88	18.02	2.08	1	3.63	39.62	41.3	70.98	0.78	1.34	1.08
chr1.capped.1781	AT1G16060	0.81	0.27	0.23	0.7	0.94	0.42	0.24	0.7	0.4	0.22	0.07	0.07	0.52	0.45	0.42	1.11	0.66	0.36
chr1.capped.1782	AT1G16070	1.79	1.37	0.56	0.3	0.14	0.4	0	0.1	0.28	0	0.42	0.28	0	0	0.56	1.6	1.19	1.56
chr1.capped.1783	AT1G16080	11.06	10.71	10.69	30.51	32.26	14.38	10.84	9.1	9.9	4.07	2.81	1.45	13.17	14.71	14.15	20.94	10.4	16.45
chr1.capped.1784	AT1G16170	21.39	19.07	20.97	12.1	12.36	7.63	19.34	20.43	20.19	33.7	27.34	15.78	23.07	28.93	24.78	19.31	11.24	15.25
chr1.capped.1785	AT1G16180	55.7	50.96	55.92	58.77	72.74	49.44	70.46	50.9	51.98	79.62	63.69	51.1	64.19	78.51	122.11	94.88	33	56.82
chr1.capped.1786	AT1G16190	9.04	9.43	7.91	5.13	5.91	2.95	11.53	9.8	13.63	3.96	4.5	5.59	12.5	8.81	10.9	12.44	6.91	8.35
chr1.capped.1787	AT1G16210	22.99	22.21	23.2	28.6	32.86	21.04	22.4	19.24	20.87	23.52	25.16	20.4	34.4	40.24	54.15	38.41	13.8	29.04
chr1.capped.1788	AT1G16220	0.99	0.96	0.42	0.5	0.07	0.17	0.16	0	0.16	0.11	0	0.07	0.52	0.33	0.14	1.84	0.52	1.56
chr1.capped.1789	AT1G16220	0.45	0.28	0.4	0	0.07	0.08	0.58	0.4	0.25	0	0	0	1.17	0.44	0.28	0.81	0.65	0.6
chr1.capped.179	AT1G02500	163.25	96.15	105.12	99.72	108.77	92.38	156.64	133.04	145.64	114.86	86.98	83.56	132.81	146.72	209.21	195.37	79.3	105.01
chr1.capped.1790	AT1G16240	44.13	42.64	48.28	44.7	49.55	33.28	58.78	40.59	45.99	59.21	55.84	39.67	53.64	63.49	79.96	76.12	33.57	53
chr1.capped.1791	AT1G16250	1.17	0.95	0.47	0.5	1.62	1.28	1.4	0.8	1.14	0.77	0.63	0.87	1.17	1.55	1.55	3.27	0.26	1.55
chr1.capped.1792	AT1G16260	0.54	0.55	0.24	1.13	0.81	0.38	0.1	0	0	0	0.07	0.29	0.06	0.34	0.42	0.85	0.4	0.36
chr1.capped.1793	AT1G16270	4.31	4.46	3.63	4.11	3.84	2.68	4.63	5.2	5.15	3.41	2.03	2.48	4.01	3.89	6.06	2.65	2.24	4.3
chr1.capped.1794	AT1G16280	5.1	3.78	3.21	4.13	4.54	2.47	3.14	2.91	2.7	1.54	1.33	2.05	2.07	2.11	6.95	5.38	3.76	7.03
chr1.capped.1796	AT1G16290	6.9	5.32	5.66	0	0.07	0.16	0.49	0.8	0.08	20.59	24.41	14.82	1.16	0.99	4.12	2.32	0	0.24
chr1.capped.1797	AT1G16300	4.81	4.72	4.34	1.71	2.15	1.27	3.65	2.2	3.36	2.73	1.05	2.58	3.61	3.67	5.94	8.43	3.35	7.97
chr1.capped.1798	AT1G16310	3.86	1.92	2.82	2.91	2.38	2.04	2.06	0.7	1.05	4.61	4.22	3.96	0.13	0.11	0.7	0.73	1.05	2.04
chr1.capped.1799	AT1G16310	0.45	0.35	0.31	0.1	0.21	0.13	0.08	0.3	0	0.44	0.14	0.73	0	0	0	0	0.26	0
chr1.capped.18	AT1G01130	6.51	5.34	5.94	1.1	0.54	0.43	1.31	1.77	4.24	1.32	0.35	2.04	3.61	3.04	3.97	2.32	1.46	1.32
chr1.capped.180	AT1G02510	0	0	0	0	0	0	0	0	0	0	0	0	0	0	0	0	0	0
chr1.capped.1800	AT1G16320	5.19	4.51	7.25	30.97	35.29	23.13	8.71	4.3	4.22	6.47	4.15	3.2	7.89	6.88	6.93	9.36	4.53	7.04
chr1.capped.1801	AT1G16330	1.96	1.29	0.99	0.1	0	0.11	0.16	0.2	0.08	1.43	1.33	1.4	0.13	0.11	0.42	3.52	1.05	1.08
chr1.capped.1802	AT1G16340	7.77	7.29	5.75	4.54	2.96	1.59	8.93	9.13	8.28	3.06	2.16	2.05	9.09	9.09	6.51	12.5	6.43	12.6
chr1.capped.1803	AT1G16350	6.15	6.9	5.58	4.09	4.03	1.72	5.78	3.98	4.12	1.21	2.76	1.82	10.31	10.49	20.1	18.12	5.47	8.77
chr1.capped.1804	AT1G16360	9.13	9.06	11.5	0	0.07	0.05	0.49	1	0.24	25.06	38.71	30.72	0.13	0	0.84	1.27	0	0
chr1.capped.1805	AT1G16370	1.25	1.22	1.54	0.43	0.14	0.11	0.91	0.46	1.14	2.42	0.49	0.66	0	0	0	0.02	0.13	0
chr1.capped.1806	AT1G16380	1.35	2.15	3.46	0	0	0	0	0	0	5.48	11.71	4.76	0	0	0	0.51	0	0
chr1.capped.1807	AT1G16430	6.7	5.86	6.51	5.24	5.44	3.29	5.14	4.71	4.1	6.36	4.51	4.2	6.33	5.62	6.09	9.89	8.84	9.46
chr1.capped.1808	AT1G16445	0.54	0.75	0.62	2.22	2.83	2.13	0.49	0.3	0.48	0.11	0.07	0.29	0.39	1	0.85	2.34	0.66	1.67
chr1.capped.1809	AT1G16460	14.53	11.51	14.22	16.33	17.53	12.1	16.61	15.54	16.75	7.67	4.8	4.22	19.34	15.25	27.76	28.25	12.17	18.7
chr1.capped.1810	AT1G16470	25.67	26.14	26.31	19.77	25.7	19.15	32.42	29.26	34.12	19.29	19.81	15.63	24.39	26.85	33.78	47.95	15.16	19.9
chr1.capped.1811	AT1G16480	1.16	0.74	0.54	0.4	0.67	0.37	0.17	0.4	0.24	0	0.21	0.3	0.52	0.55	0.28	0.99	1.47	1.08
chr1.capped.1812	AT1G05227	1.52	0.69	0.92	2.22	1.56	1.14	1.72	1.4	1.77	0.66	0.84	1.14	2.07	1.21	0.98	1.56	2.65	1.91
chr1.capped.1813	AT1G16490	0.71	0.07	0.16	0.2	0.14	0.14	0.25	0.4	0.41	0.11	0.21	0.07	0.13	0	0	1.54	0.67	0.36
chr1.capped.1814	AT1G16500	4.18	4.32	2.13	3.74	4.3	3.29	5.25	6.78	4.79	1.32	2.29	1.49	9.14	7.18	14.42	26.07	6.35	6.33
chr1.capped.1815	AT1G16510	8.28	1.82	2.92	3.73	4.49	6.81	7.85	3.01	2.13	6.68	1.76	3.68	1.29	1.44	1.84	4.95	8.81	12.37
chr1.capped.1816	AT1G16515	2.85	2.44	1.95	1.4	1.56	2.12	12.49	6.32	3.85	1.98	2.46	1.52	0.26	0.55	0.14	1.23	2.39	1.81
chr1.capped.1817	AT1G16520	5.63	4.88	4.32	0.7	1.35	0.96	5.64	5.01	5.38	2.86	1.97	2.4	5.42	6.9	7.34	20.01	6.57	12.17
chr1.capped.1818	AT1G16520	0	0	0.39	0	0	0.04	0.16	0.1	0.4	0.11	0	0.29	0	0.22	0	0.08	0.52	0.24
chr1.capped.1819	AT1G16540	3.3	1.89	2.28	2.62	3.21	2.58	2.23	2.7	1.31	2.74	2.12	1.97	2.07	1.79	3.55	1.39	1.19	1.55
chr1.capped.182	AT1G02560	84.17	70.23	85.75	197.89	174.38	106.33	84.94	64.3	82.04	51.98	38.15	40.02	53.74	43.15	66.64	46.98	37.21	76
chr1.capped.1820	.	0.9	0.48	0.24	0.74	0.42	0.34	0.08	0.2	0.16	0	0.07	0	0	0.22	0.56	1.29	1.32	0.84
chr1.capped.1821	AT1G16560	13.07	9.83	9.99	6.34	8.96	4.62	13.52	9.53	10.99	10.74	12.06	11.68	8.49	12.02	11.46	21.01	6.01	10.84
chr1.capped.1822	AT1G16590	4.34	2.21	2.15	4.21	3.92	2.03	2.8	2.4	2.34	1.43	1.96	1.16	2.86	3.11	4.24	6.9	3.18	5.85
chr1.capped.1823	AT1G16570	7.75	6.86	6.01	5.05	5.28	2.88	14.88	9.02	9.39	5.8	7.42	4.58	8.62	8.92	13.03	13.49	7.11	9.28
chr1.capped.1824	AT1G16610	26.96	25.42	18.54	16.75	17.38	9.95	25.48	23.92	23.27	13.95	8.64	10.87	26.67	22.52	29.63	67.18	27.93	44.73
chr1.capped.1825	AT1G16630	2.06	1.28	0.9	0.1	0.2	0.06	0.08	0.2	0.41	0.33	0.07	0.07	0	0.17	0.28	3.26	1.19	0.84
chr1.capped.1827	AT1G16635	0.98	0.88	1.3	1.41	0.86	0.37	0.41	0.5	0.49	0.66	0.64	0.96	0.77	0.34	0.43	0.57	0.81	0.36
chr1.capped.1828	AT1G16640	2.61	1.88	2.15	0.8	1.22	0.89	0.65	0.4	0.72	0.11	0.07	0.21	3.88	5.22	3.67	4.84	3.43	4.89
chr1.capped.1829	AT1G16635	0.24	0	0.09	0.3	0.4	0.1	0.49	0.55	0.12	0.05	0.36	0.29	0	0.06	0.42	0.04	0.18	0.61
chr1.capped.183	AT1G02610	11.93	10.31	14.74	129.38	115.81	78.72	68	30.33	14.4	12.89	13.71	6.08	13.64	26.7	17.02	21.31	49.28	76.54
chr1.capped.1830	AT1G16650	1.33	1.42	1.31	3.73	3.68	1.76	3.31	1.1	1.96	0.44	0.91	0.07	1.93	1.9	2.98	2.73	1.34	3.21
chr1.capped.1831	AT1G16670	1.78	2.1	2.36	3.42	3.15	2.18	3.88	2.21	1.57	1.1	1.34	0.44	3.61	3.12	3.82	4.54	1.07	2.39
chr1.capped.1832	AT1G16680	1.08	1.71	0.85	1.74	1.83	0.96	1.73	1.8	1.13	0.33	1.12	0.5	1.43	1.32	1.69	3.64	2.11	3.64
chr1.capped.1833	AT1G16680	0.63	0.88	0.23	1.2	1.01	0.88	0.82	0.7	0.48	0.11	0.63	0.14	0.39	0.33	0.56	2.02	0.39	1.44
chr1.capped.1834	AT1G16690	1.89	1.89	1.4	2.02	2.04	1.2	2.73	1.6	2.19	0.44	0.84	0.72	1.69	1.44	2.12	4.03	2.11	3.12
chr1.capped.1835	AT1G16700	41.59	34.79	41.74	47.81	52.78	36.95	40.59	31.11	41.17	42.17	39.47	39.55	55.56	65.08	90.6	45.97	20.25	30.09
chr1.capped.1836	AT1G16700	0.9	0.34	0.31	0.4	0.41	0.27	0.08	0.5	0.49	0.77	0.42	0.81	0.39	0.44	1.12	0.49	0	0.12
chr1.capped.1837	AT1G16705	25.97	26.97	35.47	4.51	6.47	3.86	83.44	70.47	72.02	25.6	30.75	21.2	0.39	1.1	1.68	48.09	24.24	20.71
chr1.capped.1838	AT1G16710	5.48	4.66	4.98	6.13	4.69	4.03	7	5.31	5.9	2.75	3.95	4.2	5.42	4.59	6.36	4.86	4.64	6.8
chr1.capped.1839	AT1G16720	6.15	5.48	6.91	19.07	18	14.06	4.47	7	4.7	2.86	3.76	4.25	6.59	3.97	6.36	2.27	3.18	4.78
chr1.capped.184	AT1G02630	0.45	0.34	0.4	0	0	0.02	0.17	0	0.57	0	0	0.07	0.52	0.78	0.28	2.46	1.18	1.2
chr1.capped.1840	AT1G16730	0.54	0.68	0.93	1.6	2.75	1.01	1.99	1.8	1.48	0.22	0.28	0	0.78	0.33	0.14	0.77	0.52	0.72
chr1.capped.1841	AT1G16740	16.41	17.61	17.62	18.89	21.59	10.54	12.03	15.94	13.58	9.53	8.52	8.22	18.45	21.86	26.35	50.14	21.55	21.22
chr1.capped.1842	AT1G16750	2.67	4.94	4.07	1.44	2.5	1.2	12.36	8.78	11.15	1.32	2.2	1.38	1.11	0.72	0.43	7.56	2.38	3.94
chr1.capped.1843	AT1G16760	8.08	9.19	16.82	0.1	0	0.41	0.32	0.9	0.32	39.01	48.43	25.6	0	0	1.7	0.38	0.26	0.24
chr1.capped.1845	AT1G16780	2.33	1.54	2.77	0.4	1.9	0.8	2.82	2.3	3.41	2.08	1.82	2.9	3.49	3.32	4.79	7.1	2.9	2.76
chr1.capped.1846	AT1G16790	8.22	5.33	5.52	6.36	5.7	5.36	4.56	4.7	4.57	3.95	3.32	4.78	5.03	6.01	7.07	8.01	6.96	10.85
chr1.capped.1847	AT1G16800	0.63	0.89	0.24	0.6	0.41	0.4	0.24	0.7	0.4	0.33	0.63	0.42	0.52	0.33	0.42	0.95	0.78	0.84
chr1.capped.1848	AT1G16810	45.03	45.46	51.37	41.06	25.03	21.42	61.59	46.35	44.57	29.27	34.11	31.43	50.92	64.82	72.8	23.49	55.08	72.83
chr1.capped.1849	AT1G16820	3.3	3.56	2.78	3.5	3.69	2.48	4.54	3.41	3.34	3.08	3.44	2.26	3.48	6.89	4.23	5.43	2.78	4.65
chr1.capped.185	AT1G02640	17.65	11.92	7.94	14.54	14.02	9.57	18.87	7.58	12.48	13.42	9.05	6.43	26.29	30.02	31.19	43.53	26.95	46.19
chr1.capped.1850	AT1G16825	12.85	8.65	9.46	6.08	7.63	3.39	7.49	6.01	5.6	14.9	20.77	13.47	13.26	15.03	18.3	18.19	8.99	9.03
chr1.capped.1851	AT1G16830	0.98	0.42	0.23	0.3	0.34	0.09	0.58	0.4	0.4	0.11	0.07	0.14	0.52	0	1.81	1.36	0.39	0.66
chr1.capped.1853	AT1G16840	24.87	22.55	26.59	41.49	46.49	31.73	50.2	32.41	41.12	45.27	30.68	23.37	30.13	34.5	63.75	32.78	14.6	19.27
chr1.capped.1854	AT1G16850	17.44	19.94	27.81	2.82	3.95	3.58	40.51	16.86	96.57	54.35	12.07	12.31	0.65	0.11	3.25	1.55	0.93	2.38
chr1.capped.1855	AT1G16860	9.51	7.57	10.27	2.65	3.31	2.05	19.42	10.15	18.48	9.28	4.07	4.16	6.09	4.04	14.6	6.87	3.09	3.66
chr1.capped.1857	AT1G16870	6.97	5.45	4.43	4.62	6.07	2.61	5.64	4.9	5.39	3.08	2.73	3.23	8.02	7.82	9.47	10.37	6.4	8.33
chr1.capped.1858	AT1G16880	64.09	54.82	71.08	224.77	235.86	138.79	61	60.85	74.57	26.65	18.57	20.93	68.08	87.19	88.57	40.77	19.4	30.23
chr1.capped.1859	AT1G16890	102.51	100.24	112.27	145.67	162.78	115.45	128.63	106.08	102.88	97.45	103.45	78.42	117.02	148.7	160.07	155.39	80.61	117.16
chr1.capped.186	AT1G02640	2.41	1.7	1.09	0.1	0.14	0.04	0.64	0.5	0.08	1.75	2.28	3	0.13	0	0	0.19	0.13	0.24
chr1.capped.1860	AT1G16900	8.95	5.56	5.69	4.11	4.89	3.68	5.79	3.7	5.23	5.26	4.57	4.77	4.51	3.89	8.17	16.19	5.61	8.26
chr1.capped.1861	AT1G16916	19.5	16.39	15.37	24.77	20.87	14.13	20.61	21.72	21.15	8.24	8.13	7.43	20.62	30.72	20.37	17.09	33.46	41.54
chr1.capped.1862	AT1G16920	0	0.28	0.24	0.1	0.61	0.24	0.24	0	0.08	0.11	0.07	0.07	0.65	0.55	0.14	0.33	0.26	0.6
chr1.capped.1863	AT1G16920	19.56	17.87	16.93	6.55	9.48	5.27	36.01	25.72	29.86	9.01	7.88	6.89	12.62	11.77	8.93	54.31	18.97	27.55
chr1.capped.1864	AT1G16930	1.88	0.88	1.61	1.9	2.15	1.21	4.06	2.6	2.62	0.55	0.42	0.51	2.58	2.35	2.97	1.36	0.52	2.75
chr1.capped.1865	AT1G16950	0.18	0.27	0.08	1.31	0.47	0.3	0	0	0	0	0	0	0	0.11	0.14	0.02	0.13	0.24
chr1.capped.1866	AT1G16960	8.13	9.13	7.94	18.86	22.5	11.4	1.53	1.6	2.02	2.74	1.33	3.01	14.61	22	10.04	30.43	17.03	10.13
chr1.capped.1867	AT1G16970	2.59	2.09	1.68	2.62	2.07	1.13	1.57	1.6	1.81	1.1	0.49	0.73	1.81	2.12	3.39	8.13	3.2	3.94
chr1.capped.1868	AT1G17020	2.32	2.72	1.39	13.93	13.36	9.23	0	0.1	0.16	0.77	0.84	0.72	7.87	2.67	0.42	4.78	0.13	2.03
chr1.capped.1869	AT1G17030	16.58	10.85	7.47	1.72	1.63	1.62	4.38	0.8	0.54	14	13.43	18.24	4.27	0.89	2.13	16.01	2.53	5.59
chr1.capped.187	AT1G02640	0.63	0.49	0.79	0.1	0.33	0.08	0.4	0	0.32	0.88	0.14	0.42	0.19	0.33	0.28	1.48	0.52	1.2
chr1.capped.1871	AT1G17040	2.78	1.15	1.41	1.7	1.56	1.09	1.31	2	0.96	1.87	1.4	1.15	1.17	1.76	2.95	3.65	1.18	3.24
chr1.capped.1872	AT1G17050	2.05	1.5	2.57	2.16	1.75	3.71	1.72	1.23	2.27	0.63	0.42	0.4	4.98	3.84	4.19	0.88	3.52	4.28
chr1.capped.1873	AT1G17050	0.45	0.28	0.48	0.1	0.07	0.3	0.24	0.4	0.32	0	0.21	0.14	0.14	0.22	0.14	0.04	0.26	0.24
chr1.capped.1874	AT1G17050	0.63	0.68	0.85	2.01	3.3	2.02	1.07	0.6	0.32	0	0.07	0	0.39	0.66	0.71	0.29	0.26	0.84
chr1.capped.1875	AT1G17060	1.52	1.69	1.45	0.9	0.67	0.87	0.33	0.5	0.57	0.99	0.56	0.35	0.26	1.23	0.28	2.66	1.33	1.69
chr1.capped.1876	AT1G17070	3.4	3.64	2.16	2.21	3.03	1.69	2.72	3.41	4.24	1.32	1.76	1.75	2.72	2.45	3.38	4.14	4.13	3.82
chr1.capped.1877	AT1G17080	52.73	42.58	52.3	56.2	61.26	48.24	73.3	51.31	53.55	52.12	51.37	39.56	76.3	85.52	143.23	56.47	27.1	48.86
chr1.capped.1878	AT1G17090	0.9	0.28	0.92	0.6	0.2	0.14	0.24	0.3	0.48	0.55	0.49	0.64	0.52	0.77	1.12	0.56	0.39	0.48
chr1.capped.1879	AT1G17090	0.45	0.55	0.7	0.6	0.6	0.33	1.17	1	0.66	0.11	0.07	0.29	1.42	0.78	0.7	1.22	0.92	2.03
chr1.capped.1880	AT1G17100	16.41	15.7	15.42	31.19	34.58	16.49	10.45	9	10.44	9.75	10.29	10.98	22.79	21.92	33	27.71	10.19	15.49
chr1.capped.1882	AT1G17110	8.91	6.95	8.58	8.44	9.24	4.9	10.72	8.21	11.46	2.75	2.53	3.16	6.07	5.8	6.81	13.4	6.78	10.5
chr1.capped.1883	AT1G17120	8.48	7.26	7.17	8.45	9.23	5.71	17.84	11.24	11.75	3.84	3.45	3.22	8.78	12.16	17.27	14.27	7.76	16.54
chr1.capped.1884	AT1G17130	18.26	15.05	16.37	17.38	16.57	13.58	17.53	15.67	16.36	14.77	11.8	11.98	15.07	17.1	20.84	21.01	14.76	18.65
chr1.capped.1885	AT1G17140	0.63	0.55	0.61	0.5	0.21	0.08	0.67	0.5	0.8	0	0.14	0.21	0.39	0.66	0.64	1.91	0.66	0.48
chr1.capped.1886	AT1G17140	6.21	7.15	7.51	3.8	3.78	1.94	9.85	7.81	9.91	3.85	2.78	3.5	5.71	4.93	7.52	4.78	2.5	4.57
chr1.capped.1887	AT1G17145	9.1	5.46	8.76	9.88	9.57	6.62	10.29	6.92	4.94	8.42	10.54	7.23	7.21	10.49	8.5	13.54	6.04	11.41
chr1.capped.1888	AT1G17147	0.09	0.07	0.16	0.2	0.07	0.15	0	0	0	0	0.07	0	0	0	0.28	0.06	0.13	0.48
chr1.capped.1889	AT1G17160	10.01	5.65	7.95	6.03	8.58	5.49	11.1	8.62	9.65	7.44	6.2	6.18	8.26	5.55	13.72	10.28	4.28	8.36
chr1.capped.189	AT1G02660	0	0	0	0	0	0	0	0	0	0	0	0	0	0	0	0	0	0.18
chr1.capped.1890	AT1G17170	0.81	0.8	1.7	2.52	1.87	11.06	1.56	0.9	1.86	1.54	0.84	0.92	0.65	1.32	0.42	0.62	0.13	0.84
chr1.capped.1891	AT1G17180	0.72	0.53	1.46	0	0.07	0.58	0.08	0.6	1.63	0.11	0.7	1.32	0	0.22	0	0.13	0	0
chr1.capped.1892	AT1G17190	15.14	14.27	17.37	10.3	12.6	5.72	14.94	16.46	22.11	16.62	9.48	10.04	1.42	1.01	1.84	25.13	10.81	9.39
chr1.capped.1893	AT1G17200	66.7	59.15	52.99	57.07	69.5	43.36	90.5	71.96	72.09	19.62	22.46	13.43	30.08	42.92	40.65	205.19	120.74	140.57
chr1.capped.1894	AT1G17210	10.7	10.99	9.66	8.87	8.37	7.17	17.85	15.65	13.95	5.5	6.51	5.89	22.13	22.61	25.92	43.25	15.95	25.56
chr1.capped.1895	AT1G17220	6.11	4.78	4.79	11.71	12.27	7.17	7.2	4.41	4.74	1.48	1.4	1.4	4.45	4.54	5.54	6.04	1.98	7.25
chr1.capped.1896	AT1G17230	1.24	0.34	1.01	0.5	1.29	0.47	0.74	0.3	0.64	0.33	0.21	0.21	0.39	0.44	0.56	0.8	0.39	0.72
chr1.capped.1897	AT1G17235	0.81	0.41	0.62	1.11	0.74	0.28	1.48	0.9	1.05	0.44	0.35	0.14	1.04	0.89	0.99	1.3	0.26	1.43
chr1.capped.1898	AT1G17235	1.7	0.96	0.7	0.3	0.2	0.25	0.66	0.8	0.81	0.55	0.42	0.94	0.26	1.02	0.14	0.67	1.86	1.08
chr1.capped.1899	AT1G17255	0.54	0.89	0.69	0.4	0.74	0.58	0.82	0.4	0.4	1.43	1.54	0.66	0.52	1.1	1.42	0.72	0.4	0.96
chr1.capped.19	AT1G01130	5.19	5.56	5.14	0.9	0.68	0.59	1.32	2	4.24	0.66	0.49	2.26	1.17	0.56	5.65	1.95	2.66	1.68
chr1.capped.190	AT1G02660	31.45	23.95	34.33	9.38	9.6	10.03	43.14	24.96	44.24	60.67	38.36	29.23	28.61	29.12	94.26	10.57	6.4	10.14
chr1.capped.1900	AT1G17270	2.95	1.69	2.31	2	1.48	0.93	1.4	1.7	1.77	2.41	2.46	2.57	1.43	1.99	2.54	1.65	0.93	1.55
chr1.capped.1901	AT1G17280	26.29	20.63	26.13	30.37	29.53	20.53	33.28	29.1	28.91	26.67	27.78	21.87	28.33	20.75	40.25	28.06	14.99	22.85
chr1.capped.1902	AT1G17290	77.6	78.16	92.91	82.76	83.97	67.1	91.31	80.31	115.62	71.59	59.47	41.15	130.84	116.1	337.72	40.69	23.74	32.26
chr1.capped.1903	AT1G17290	3.04	3.51	4.04	3.83	5.54	2.49	1.65	1.5	1.06	3.06	2.68	2.06	1.42	2.23	7.65	1.48	0.39	0.84
chr1.capped.1904	AT1G17290	2.33	0.95	0.78	0	0	0.07	0	0	0.08	0.44	3.66	5.67	0	0.11	0	0.08	0	0
chr1.capped.1905	AT1G17300	8.29	11.44	12.9	0.81	0.34	0.54	94.32	118.11	42.76	5.26	22.24	4.98	9.02	7.02	0.56	0.63	0.52	0.24
chr1.capped.1906	AT1G17330	6.43	4.56	4.88	6.15	5.76	4.79	6.73	6.31	4.44	2.64	2.19	2.06	5.56	6.68	8.93	11.15	5.61	12.01
chr1.capped.1907	AT1G17340	3.33	3.15	2.31	3.52	5.89	2.58	3.03	1.8	1.91	1.73	1.75	1.44	1.29	1.22	1.12	1.87	0.66	1.32
chr1.capped.1908	AT1G17340	1.42	0.34	0.39	0	0	0.02	0	0	0	1.64	1.83	1.88	0	0.11	0	0	0	0
chr1.capped.191	AT1G02670	1.7	1.29	1.45	0.5	0.47	0.79	2.73	1.2	1.38	0.49	0.63	0.44	3.1	4.9	5.22	3.24	1.85	1.31
chr1.capped.1910	AT1G17350	8.74	6.25	5.77	2.82	2.1	1.34	7.97	6.42	6.62	3.18	2.46	1.51	10.31	11.82	10.65	21.27	11.23	15.35
chr1.capped.1911	AT1G17360	9.92	11.51	12.84	1.21	0.8	0.82	5.05	5.12	14.28	4.82	1.62	5.93	1.55	1.13	4.57	3.7	0.82	1.56
chr1.capped.1912	AT1G17370	26	19.66	17.62	11.23	10.48	6.7	14.28	10.76	16.29	8.88	8.18	9.4	13.15	10.55	14.87	24.7	16.98	31.16
chr1.capped.1913	AT1G17380	63.39	66.13	64.24	16.43	15.82	9.7	35.35	36.43	55.69	32.57	23.18	51.03	9.15	14.8	10.6	59.73	73.1	46.51
chr1.capped.1914	AT1G17410	7.75	5.93	7.25	5.24	5.15	3.74	11.95	9.33	8.96	7.56	6.42	4.05	7.08	9.85	7.52	12.48	9.78	14.16
chr1.capped.1915	AT1G17420	75.19	67.92	86.54	45.99	61.75	11.95	16.94	6.73	29.59	13.32	4.6	11.75	3.74	3.01	13.48	11.26	6.29	6.78
chr1.capped.1919	AT1G17430	12.74	8.63	11.29	1.61	1.61	2.05	13.61	17.97	22.83	9.95	8.75	10.2	16.48	17.42	22.84	7.57	3.22	5.95
chr1.capped.192	AT1G02680	13.26	10.45	13.23	13.11	14.62	12.84	18.2	16.17	14.06	7.57	8.18	5.98	17.87	21.68	19.3	32.13	26.46	38.28
chr1.capped.1920	AT1G17440	6.98	7.41	6.94	4.74	5.66	5.74	10.04	9.82	8.65	5.48	4.49	4.93	9.45	9.24	7.76	11.72	8.97	9.19
chr1.capped.1921	AT1G17450	1.35	1.16	0.78	0.6	0.96	0.69	0.32	0.5	0.4	0.44	0.56	0.5	0.91	0.39	0.84	1.04	0.66	1.67
chr1.capped.1922	AT1G17455	39.28	30.83	41.99	24.72	24.25	16.05	71.69	40.55	42.86	48.23	50.55	37.62	20.6	27.92	17.27	17.61	23.06	38.42
chr1.capped.1923	AT1G17460	1.52	1.99	1.32	1.61	2.17	1.57	1.22	1	0.97	1.32	0.84	0.86	1.04	0.44	1.26	2.65	2.66	2.27
chr1.capped.1924	AT1G17470	9.91	9.9	6.66	6.77	7.23	7.03	11.36	8.32	8.39	10.38	11.03	8.53	9.16	8.37	9.34	18.32	6.27	10.59
chr1.capped.1925	AT1G17480	0.9	1.38	0.79	1.6	1.01	0.86	0.16	0.6	0.48	0.22	0.35	0.28	0.39	0.33	1.12	1.68	0.66	2.99
chr1.capped.1926	AT1G17490	46.21	37.01	43.91	41.5	53.18	29.15	31.65	29.39	35.12	53.78	60.52	44.06	67.14	72.89	105.49	44.97	31.24	31.66
chr1.capped.1927	AT1G17500	3.76	3.55	2.47	1.2	2.05	1.62	2.73	2.4	3.33	0.66	0.84	0.99	4.02	5.23	11.05	4.2	2.11	2.75
chr1.capped.1928	AT1G17510	17.11	14.56	15.7	7.73	8.43	5.07	15.33	16.04	20.55	10.63	7.68	9.21	10.05	15.17	12.03	32.39	17.39	22.45
chr1.capped.1929	AT1G17520	9.89	7.95	8.9	8.7	9.17	7.15	13.54	7.83	9.19	9.74	8.86	4.78	9.53	12.5	11.76	16.18	12.08	25.57
chr1.capped.193	AT1G02680	2.94	2.78	4.66	0.2	0.07	0.04	0	0.7	0	10.29	18.15	4.91	0.13	0.22	0.28	0.91	0	0
chr1.capped.1930	AT1G17530	20.25	15.42	12.18	13.2	15.64	12.05	15.77	12.83	8.94	16.63	15.46	15.49	22.92	27.92	24.95	32	17.67	25.91
chr1.capped.1932	AT1G17540	9.96	9.94	6.87	0	0.07	0.14	0.16	4.97	0.16	54.28	23.9	23.86	0.13	0.33	2.54	1.96	0	0
chr1.capped.1933	AT1G17550	6.08	6	7.06	5.84	5.9	4.56	11	9.61	9.82	4.71	6	3.96	5.82	6	10.03	10.8	4.93	9.66
chr1.capped.1934	AT1G17560	9.62	9.36	7.18	2.61	2.75	1.59	6.54	7.91	8.46	2.31	2.8	2.57	10.44	11.5	15.01	28.83	8.03	9.29
chr1.capped.1935	AT1G17580	3.74	2.15	1.45	3.22	2.42	2.17	3.81	3.7	2.53	1.32	1.61	1.24	3.61	2.34	5.82	2.89	0.93	5.7
chr1.capped.1936	AT1G17580	0.09	0.07	0.16	0.2	0.14	0.16	0	0.2	0	0.11	0.07	0	0.13	0	0	0.04	0.13	0
chr1.capped.1937	AT1G17590	3.05	3.09	2.94	0.3	1.29	0.92	2.97	2.17	1.63	1.54	0.98	0.95	1.56	1.2	2.35	9.66	3.7	4.45
chr1.capped.1938	AT1G17610	0.09	0	0	0.2	0.07	0.15	0.33	0	0	0	0.14	0.21	0	0	0.14	0.18	0.4	0.01
chr1.capped.1939	AT1G17620	77.62	89.27	73.33	10.5	16.31	7.76	32.95	32.23	63.78	24.27	7.9	20.03	37.06	39.08	233.09	29.4	11.81	12.36
chr1.capped.194	AT1G02690	3.48	3.5	1.15	0.7	0.86	1.15	1	0.3	0.57	0.22	0.14	0.36	0.4	0.22	1.27	12.57	3.49	6.91
chr1.capped.1940	AT1G17630	0.54	0.33	0.47	0.1	0.21	0.15	0.57	0.3	0.32	0.11	0.21	0.07	0.52	0.22	1.27	0.58	0.13	0.6
chr1.capped.1941	AT1G17640	2.32	2.71	2.26	2.81	3.61	2.11	3.72	2.31	4.24	0.77	0.71	1.6	0.91	1.44	1.41	3.68	2	2.39
chr1.capped.1942	AT1G17650	5.88	5.24	4.69	5.75	6.15	3.6	6.23	4.31	7.54	2.09	2.53	2.32	5.56	4.56	4.25	8.55	4.11	7.05
chr1.capped.1943	AT1G17665	2.25	1.88	1.64	6.54	7.78	3	5.13	2.4	3.06	1.64	1.68	0.71	4.26	3.57	3.1	4.13	2.35	6.1
chr1.capped.1944	AT1G17680	5.09	3.65	3.59	5.76	3.21	3.53	3.15	2.3	3.61	2.96	2.46	2.14	2.2	3.23	3.69	7.58	2.13	6.43
chr1.capped.1946	AT1G17690	4.01	3.7	3.46	2.11	3.48	1.93	2.38	2.8	2.12	1.65	1.19	1.23	2.58	2.79	3.1	6.39	3.47	4.66
chr1.capped.1947	AT1G17700	0.09	0.26	0.08	0	0.41	0.12	0.08	0.4	0.08	0	0.14	0.04	0	0.22	0.14	1.37	0.66	1.31
chr1.capped.1948	AT1G17710	4.1	2.76	4.52	1.92	3.21	2.82	0.74	0.7	0.16	13.99	6.73	5.67	0	0.11	0.42	0.15	0	0.36
chr1.capped.1949	AT1G17720	2.24	2.1	1.37	0.8	1.21	1.01	1.23	2.2	1.63	2.74	2.47	1.83	3.34	3.68	4.39	0.95	2.41	0.96
chr1.capped.195	AT1G02700	0.99	1.08	1.77	0.2	0.14	0.02	17.03	10.44	3.84	1.1	2.04	0.56	0.52	2.12	2.7	0.31	0.39	0.12
chr1.capped.1950	AT1G17720	26.99	30.91	31.33	27.26	21.92	15.5	35.35	35.5	37.08	26.71	35.25	35.55	25.86	32.59	37.53	15.75	28.95	31.99
chr1.capped.1951	AT1G17730	21.64	20.16	22.32	21.3	23.71	16.59	23.74	22.97	30.62	18.15	16.19	12.9	23.42	21.33	38.84	33	18.63	17.84
chr1.capped.1952	AT1G17745	10.79	11.06	13.27	18.49	20.62	16.61	12.19	8.93	14.24	7.11	3.88	5.99	2.97	1.11	1.26	3.37	4.93	9.62
chr1.capped.1953	AT1G17750	1.35	2.04	0.8	0.4	0.62	0.51	0.66	0.5	0.76	0.22	0.14	0.22	0.39	0	0	0.75	0.39	0.36
chr1.capped.1954	AT1G17760	4.65	4.39	3.27	4.03	3.75	2.64	5.21	2.71	4.08	2.08	1.97	1.54	5.66	5.59	7.35	9.54	6.29	9.74
chr1.capped.1955	AT1G17780	3.29	3.4	3.53	8.58	9.62	6.95	1.81	1.3	0.57	2.82	4.7	2.62	3.89	7.58	7.89	5.75	5.08	4.05
chr1.capped.1956	AT1G17790	3.75	3.22	3.74	2.72	2.53	1.78	4.22	2.8	3.61	2.86	2.6	3.17	2.72	2.01	4.54	5.15	4.13	3.7
chr1.capped.1957	AT1G17820	0.45	0.49	0.16	0.1	0.14	0.06	0	0.4	0.32	0.33	0.56	0.71	0.13	0.33	0	0.19	0.52	0.36
chr1.capped.1958	AT1G17820	4.86	4.86	5.31	3.31	4.05	2.76	3.15	4	2.83	12.19	10.82	7.7	2.85	2.88	4.22	4.86	2.51	3.95
chr1.capped.1959	AT1G17830	5.09	5.44	3.84	3.02	3.49	2.03	2.9	4.11	4.56	4.17	1.8	4.04	2.46	3.09	2.39	5.65	5.83	8.24
chr1.capped.196	AT1G02700	0	0.34	0.32	0.1	0.83	0.06	0.4	0.1	0.24	0	0.14	0	0	0	0	0.04	0.13	0
chr1.capped.1960	AT1G17840	28.45	27.13	24.27	15.01	14.14	12	27.5	27.06	37.41	8.13	7.81	6.7	7.49	6.03	10.9	19.74	10.68	21.45
chr1.capped.1961	AT1G05337	0	0	0.08	0	0.07	0.02	0.08	0	0.08	0.11	0.07	0.01	0	0	0	0	0	0
chr1.capped.1962	AT1G17840	4.74	3.71	3.3	1.52	2.69	1.43	2.22	2.2	2.13	2.08	0.91	1.84	2.07	0.89	2.69	7.09	3.47	2.99
chr1.capped.1963	AT1G17850	2.15	1.49	1.45	1.61	2.61	1.37	2.47	2.1	1.56	0.33	0.56	0.14	3.1	2.44	2.39	6.68	3.21	4.65
chr1.capped.1964	AT1G17860	7.84	4.65	9.63	19.19	14.92	15.6	2.41	1.7	2.13	1.31	1.33	1.03	27.28	30.05	30.17	10.49	4.02	8.57
chr1.capped.1965	AT1G17870	0.27	0.14	0.16	0.2	0.21	0.08	0.08	0.1	0	0.11	0.14	0	0	0.11	0.14	0.36	0.52	0.84
chr1.capped.1966	AT1G17880	127.12	103.63	94.63	60.37	65.98	42.88	90.88	79.48	88.23	66.3	50.39	58.59	105.29	96.51	93.04	211.14	90.98	133.17
chr1.capped.1969	AT1G17890	13.38	15.37	14.13	9.08	15.34	7.27	16.58	17.43	18.28	12.07	12.7	10.96	17.39	15.17	22.24	19.02	7.6	8.11
chr1.capped.197	AT1G02705	2.14	4.04	4.28	2.91	2.86	1.21	3.24	4.11	7.32	1.86	1.2	2.14	0.13	0.11	0.14	0.37	0.27	0.36
chr1.capped.1970	AT1G17920	0.99	0.54	0.32	0	0	0	0	0	0.16	0.11	0.07	0	1.04	0.66	1.12	1.08	0.52	0.48
chr1.capped.1971	AT1G17920	0.63	0.99	0.54	0	0.21	0.13	0.16	0.42	0.48	0.66	0.35	0.37	1.29	1.55	2.69	1.51	0.65	1.32
chr1.capped.1972	AT1G17930	4.11	3.71	2.63	3.21	3.51	2.07	4.45	4	3.49	1.98	1.4	1.62	4.25	5.71	8.92	13.94	6.01	8.57
chr1.capped.1973	AT1G17940	0.36	0.41	0.28	1.2	1.56	0.98	0.41	0.2	0.33	0.11	0.07	0	0.26	0.11	0.42	0.41	0.26	0.24
chr1.capped.1974	AT1G17940	1.35	0.83	0.93	0.9	0.96	0.24	1.61	0.6	1.36	0.44	0.4	0.42	0	0	0.14	1.18	0.65	0.36
chr1.capped.1975	AT1G17940	2.56	3.02	3.41	2.44	3.04	2.07	3.29	1.6	4.25	1.1	0.44	0.86	3.11	3.02	4.19	1.65	0.78	3
chr1.capped.1977	AT1G17950	1.07	0.68	1.04	0	0.07	0.09	0.73	0	0.16	1.25	2.92	1.9	0	0	0.14	0	0	0
chr1.capped.1978	AT1G17950	0	0.14	0.08	0	0	0	0	0.2	0.16	0.11	0.07	0.22	0	0	0	0	0	0
chr1.capped.1979	AT1G17960	0	0	0	0	0	0	0	0	0.08	0	0.07	0	0	0	0.14	0.08	0.13	0
chr1.capped.198	AT1G02720	5.84	4.15	3.63	2.06	1.62	0.78	3.07	3.47	3.45	2.76	3.04	2.43	4.85	3.81	6.26	6.62	2.76	2.99
chr1.capped.1980	AT1G17960	0.45	0.62	0.55	0.1	0.61	0.38	0.64	0.5	0.32	0.33	0.42	0.14	1.17	3.45	5.64	4.66	1.18	1.68
chr1.capped.1981	AT1G17970	1.34	1.23	1.01	7.52	6.36	3.15	0.56	0.5	1.47	0	0.42	0.14	0.65	0.8	0.42	1.98	1.5	2.45
chr1.capped.1982	AT1G17970	0.45	0.14	0.24	0	0.34	0.24	0.16	0.1	0.08	0.22	0.14	0	0.13	0.22	0.28	0.16	0	0.48
chr1.capped.1983	AT1G17980	25.93	25.63	22.05	21.33	20.52	19.48	33.99	28.73	41.42	19.02	19.65	23.58	32.86	30.29	38.11	11.95	41.2	34.24
chr1.capped.1984	AT1G17990	2.4	2.77	4.11	3.28	3.91	0.74	1.11	0.85	0.36	0.64	0.36	0.31	0.13	0.28	0.35	0.16	0.14	0.12
chr1.capped.1985	AT1G17990	0.32	0.19	0.2	1.15	0.85	0.58	0.36	0.3	0.2	0.1	0.12	0.04	0.18	0.23	0	0.05	0.07	0.42
chr1.capped.1986	AT1G18000	2.39	2.56	2.85	1.51	1.23	0.41	4.85	3.86	6.3	0.59	0.36	0.68	0.76	0.84	0.92	0.85	0.48	1.25
chr1.capped.1988	AT1G18000	1.35	0.51	0.43	0.05	0.22	0.07	0.32	0.5	0.48	1.49	1.78	2	0.12	0.34	0	0.16	0	0.24
chr1.capped.1989	AT1G18000	4.92	5.36	5.4	7	8.57	5.53	13.76	11.39	10.63	3.37	3.55	3.86	4.73	4.25	3.39	1.24	1.7	2.45
chr1.capped.199	AT1G02720	0.72	0.56	0.11	0.7	0.48	0.3	1.57	0.9	1.46	0.33	0.42	0.28	1.16	1.04	0.7	0.54	0.13	0.12
chr1.capped.1990	AT1G18010	6.24	5.85	5.87	7.2	8.86	5.57	14.08	11.69	10.91	4.76	5.14	5.95	4.91	4.77	3.46	1.41	1.63	2.69
chr1.capped.1991	AT1G18010	2.13	2.49	2.73	1.31	1.1	0.36	4.48	3.71	5.93	0.59	0.36	0.68	0.7	0.78	0.71	0.79	0.41	1.01
chr1.capped.1993	AT1G18030	1.03	0	0	6.32	2.13	2.36	2.07	6.93	0	2.04	0	0	0.31	0	0	4.29	0	0
chr1.capped.1994	AT1G18040	5.27	3.92	4.41	1.3	2.74	1.74	2.89	1.9	2.37	2.31	2.25	2.28	4.51	2.99	6.5	6.44	4.27	6.81
chr1.capped.1995	AT1G18060	14.88	11.15	15.79	39.98	39.52	15.06	7.55	7.1	7.91	6.8	3.36	3	8.52	6.48	6.95	7.64	7.2	11.09
chr1.capped.1996	AT1G18070	33.14	27.8	28.94	17.06	18.18	12.11	23.09	18.47	22.32	20.03	17.17	18.8	22.03	19.43	36.11	37.3	17.13	24.6
chr1.capped.1997	AT1G18075	2.32	1.55	0.77	0.91	1.2	1.09	0.08	0	0.16	0.33	0.49	0.3	0.26	0.11	0.14	0.51	1.06	1.19
chr1.capped.1998	AT1G18075	0.45	0.47	0.16	0	0.07	0.04	0.08	0	0.33	0	0	0	0	0	0	0.94	0.66	0.48
chr1.capped.20	AT1G01140	38.53	32.38	42.05	42.66	47.62	33.36	31.87	15.06	29.26	24.82	17.83	17.07	19.18	12.97	42.82	26.47	9.79	21.97
chr1.capped.200	AT1G02720	0.54	0.68	0.47	0.2	0.28	0.1	1.16	0.7	0.08	0.88	0.63	0.36	0.13	0.11	0.42	0.52	0.13	0.36
chr1.capped.2000	AT1G18080	91.86	96.09	73.43	35.15	33.38	30.26	74.16	56.84	76.49	36.28	38.27	41.73	76.14	48.73	60.43	168.19	64.23	106.84
chr1.capped.2001	AT1G18090	1.61	1.76	1.78	1.71	1.22	0.76	1.87	1	1.76	0.77	2.1	2.38	1.68	0.45	0.28	1.71	0.53	1.44
chr1.capped.2002	.	0	0	0.08	0	0	0	0	0	0	0.11	0.14	0.07	0	0	0	0.02	0	0
chr1.capped.2003	AT1G18140	0.45	0.73	0.32	0	0	0.02	0.08	0.2	0.08	0	0	0	0.26	0	0.14	1.29	1.18	3.21
chr1.capped.2004	AT1G18150	4.22	5.54	7.29	0.1	0.14	0.18	0.32	1	0.4	24.13	24.41	13.06	0.41	0.11	0.56	1.89	0.13	0.18
chr1.capped.2005	AT1G18150	31.67	25.79	28.15	13.92	11.65	9.38	11.92	9.4	10.67	67.94	74.83	59.4	5.56	5.34	12.89	9.61	6.6	10.47
chr1.capped.2006	AT1G18160	5.55	4.96	4.31	6.03	5.43	5.62	6.87	4.7	5.5	3.62	1.89	1.87	4.8	5.87	6.86	4.86	5.05	11.35
chr1.capped.2007	AT1G18170	5.53	5.8	7.71	18.57	20.26	10.16	7.29	6.78	6.12	5.15	4.78	3.65	4.77	5.09	7.63	5.44	3.57	6.07
chr1.capped.2008	AT1G18180	8.26	6.81	7.5	2.5	2.74	1.62	3.12	4	3.72	11.52	10.23	11.43	6.86	9.44	10.89	12.23	3.16	5.99
chr1.capped.2009	AT1G18190	6.07	4.57	4.61	3.93	3.42	2.37	6.46	5.33	7.22	4.4	3.89	3.9	3.61	2.78	7.92	6.77	3.59	4.41
chr1.capped.201	AT1G02730	1.7	1.68	0.62	0.1	0.35	0.09	0	0.2	0.32	0.11	0.14	0.37	0.26	0.22	0.43	3.34	0.93	1.43
chr1.capped.2010	AT1G18200	0.89	1.27	1.85	8.27	10.21	9.68	0.16	1.3	0.56	1.54	0.49	0.5	0.13	0	0.14	0.02	0.13	0
chr1.capped.2011	AT1G18210	184.27	202.17	208.31	177.95	193.02	201.26	108.95	108.91	179.22	143.04	99.26	95.22	87.95	72.33	187.74	190.32	57.77	75.68
chr1.capped.2012	AT1G18250	25.83	23.63	10.76	1.5	2.06	2.62	0.83	2.1	4	0.87	0.64	1.54	4.26	3.79	5.1	133.26	33.84	34.49
chr1.capped.2013	AT1G18260	10.7	11.03	8.83	11.22	9.75	6.6	16.28	10.83	13.28	14.01	11.87	10.04	22.51	24.24	47.06	19.26	7.77	14.37
chr1.capped.2014	AT1G18265	0	0.07	0.15	1.5	1.2	0.48	0.08	0.1	0.08	0.11	0	0	0	0.56	0.14	0.06	0.13	0
chr1.capped.2015	AT1G18270	8.8	5.47	6.2	6.66	7.19	7.15	40.43	24.69	16.04	7.01	9.25	7.32	18.59	25.12	20.69	19.54	8.84	23.22
chr1.capped.2016	AT1G18280	87.02	30.6	24.33	0.1	0.27	0.22	24.75	5.92	0.9	154.27	54.32	102.13	0.39	2.68	0.99	2.03	1.07	1.3
chr1.capped.2017	AT1G18300	9.55	15.4	11.73	1.51	1.41	2.16	2.98	6.79	2.71	41.57	25.44	20.23	1.68	2.33	4.09	6.06	1.61	2.03
chr1.capped.2019	AT1G18320	1.54	1.21	0.58	0.58	0.59	0.38	0.64	0.76	1.04	0.11	0.32	0.52	1.03	1.28	1.43	3.31	1.02	2.4
chr1.capped.202	AT1G02740	4.06	3.3	3.18	1.4	1.62	1.94	3.47	2.6	2.61	2.53	0.91	2.27	1.76	2.11	3.52	5.07	2.65	7.28
chr1.capped.2020	AT1G18330	1.97	1.36	1.23	1.31	1.95	0.88	3.48	0.8	1.29	1.32	0.14	0.42	3.63	2.11	3.26	3.85	2.67	6.32
chr1.capped.2022	AT1G18335	4.02	3.4	2.95	4.11	4.43	2.92	4.15	3.4	4.33	4.62	5.34	5.88	4.27	7.4	7.63	7.81	3.71	6.93
chr1.capped.2023	AT1G18340	3.49	2.95	2.3	1.82	2.22	2.31	3.63	4.21	3.68	1.75	1.76	2.72	2.45	3.36	3.98	7.67	3.34	4.05
chr1.capped.2024	AT1G18360	5.27	4.24	3.22	3.43	3.35	2.28	6.17	5.01	5.56	1.43	1.75	1.53	6.83	7.69	8.2	4.68	2.64	6.08
chr1.capped.2025	AT1G18370	2.42	2.38	1.09	0.1	0.14	0.08	0	0.1	0.16	0.44	0	0.14	0.13	0.56	0.14	3.37	2.93	2.51
chr1.capped.2026	AT1G18400	7.58	4.6	6.96	0.2	0.41	0.46	0.83	1.2	1.88	3.17	1.27	1.1	104.93	118.17	152.04	3.57	3.21	3.69
chr1.capped.2027	AT1G18410	3.48	5.14	5.31	0.2	0.21	0.43	0.24	1.2	0.4	18.15	19	8.86	0.39	0.99	0.42	2.88	0.39	0.6
chr1.capped.2028	AT1G18415	1.7	2.04	1.46	1.31	0.88	0.53	2.97	2.91	3.68	1.32	0.91	0.43	3.24	1.88	3.51	6.27	4	3.94
chr1.capped.2029	AT1G18440	3.93	5.6	4.07	6.14	7.16	2.96	6.94	5.31	7.06	1.87	1.97	1.68	5.94	3.78	6.93	5.45	2.92	5.61
chr1.capped.203	AT1G02750	7.95	5.5	7.47	8.84	8.28	6.57	13.05	6.62	5.53	6.37	6.99	4.47	8.38	12.64	11.49	11.26	6.97	13.7
chr1.capped.2030	AT1G18450	9.81	9.17	5.88	5.14	6.43	4.69	10.11	9.23	8.71	1.21	2.61	1.83	11.61	11.83	13.45	50.1	11.11	21.79
chr1.capped.2031	AT1G18460	8.28	6.04	7.3	6.25	4.35	4.06	26.62	15.15	16.24	3.61	3.23	1.25	18.09	15.3	12.33	4.19	6.16	10.71
chr1.capped.2033	AT1G18470	1.6	1.56	1.38	4.43	6.76	1.63	0.41	0.2	0.74	0.99	0.42	0.37	0.64	0.78	0.84	0.83	0.52	0.36
chr1.capped.2034	AT1G18470	17.24	12.56	14.17	27.44	26.71	16.55	13.35	10.5	12.68	17.87	11.54	9.91	5.96	6.72	8.47	9.17	4.66	7.66
chr1.capped.2035	AT1G18480	12.19	7.73	10.27	12.12	11.56	7.28	10.22	8.23	9.22	6.89	5.01	5.7	9.65	8.39	12.05	14.37	6.58	10.58
chr1.capped.2037	AT1G18480	0.72	0.28	0.63	1.5	2.58	1.1	0.72	0.2	0.24	0	0	0.22	0.78	0.61	1.69	0.59	0.92	1.44
chr1.capped.2038	AT1G18486	9.74	5.9	8.24	8.66	8.14	5.73	11.65	8.38	8.92	3.74	3.44	2.54	12.52	13.02	10.03	15.05	7.85	11.1
chr1.capped.2039	AT1G18500	9.36	8.53	6.64	19.09	24.72	17.45	17.62	12.35	11.67	2.85	3.39	2.42	9.79	8.84	8.5	26.26	11.77	19.15
chr1.capped.204	AT1G02770	2.23	1.28	0.92	0.2	0.2	0.06	0.17	0.1	0.08	2.85	4.16	5.32	1.81	2.23	4.67	2.26	0.4	0.95
chr1.capped.2041	AT1G18520	3.52	1.75	3.59	0	0	0.02	0.25	0.61	0.08	11.17	4.64	4.64	0	0	0.42	0.35	0.13	0.12
chr1.capped.2042	AT1G18530	3.68	2.13	4.25	0.3	0.47	0.3	0.32	0.2	0.24	8.77	13.33	6.9	0	0.22	0.14	0.66	0.23	0.12
chr1.capped.2043	AT1G18540	147.44	114.65	110.75	52.68	55.46	29.85	71.92	74.67	104.93	50.99	38.59	54.11	104.53	80.76	109.78	283.1	118.7	153.36
chr1.capped.2044	AT1G18550	1.8	1.17	0.86	0.2	0.35	0.3	1.39	1.3	1.45	0.11	0.14	0.07	0.78	0.55	0.98	3.34	0.92	1.32
chr1.capped.2045	AT1G18560	1.44	1.62	1.62	0.8	1.15	0.63	1	1.9	1.45	0.44	0.35	1.02	0.65	0.88	1.4	2.39	1.06	1.2
chr1.capped.2046	AT1G18580	7.76	5.54	5.91	4.41	4.83	2.79	5.53	5.9	7.35	5.39	3.64	5.12	5.69	7	13.17	7.74	3.31	6.21
chr1.capped.2047	AT1G18590	2.76	3.16	1.9	7.98	6.81	3.6	1	0.4	0.49	0.33	0.42	0.88	0.51	1.34	0.28	8.42	6.57	8.8
chr1.capped.2048	AT1G18600	10.1	9.09	9.91	7.44	8.37	5.08	9.23	8.48	10.29	7.36	8.66	8.2	18.3	13.94	31.3	8.44	5.56	6.23
chr1.capped.2049	AT1G18610	2.95	1.96	2.25	0.9	1.48	1.09	1.66	1	0.73	3.63	7.6	5.61	1.22	1.43	0.99	3.2	2.03	2.4
chr1.capped.205	AT1G02780	245.29	241.2	207.55	110.04	122.46	92.4	188.85	156.04	218.83	117.79	99.09	115.33	211.49	167.64	187.2	523.68	233.91	303.37
chr1.capped.2050	AT1G18610	0.72	1.16	1.42	0.7	0.93	0.67	2.81	2.1	3.38	1.21	0.35	0.79	1.04	0.77	0.7	0.66	0.78	0.24
chr1.capped.2051	AT1G18620	5.3	5	6.56	6.84	6.97	4.82	14.48	9.45	11.82	2.86	3.65	3.41	14.78	23.64	19.5	2.32	1.57	2.58
chr1.capped.2052	AT1G18630	7.21	8.49	8.07	8.08	7.04	6.17	6.62	5.91	8.87	2.42	3.38	3.49	12.88	14.68	16.16	14.75	6.83	7.49
chr1.capped.2054	AT1G18640	24.63	21.18	19.67	18.38	20.95	12.29	29.33	26.4	26.52	15.87	14.27	14.99	22.42	22.69	29.34	38.97	16.5	28.57
chr1.capped.2055	AT1G18650	11.4	11.49	7.78	2.97	2.91	1.92	5.28	5.27	5.84	1.65	2.16	1.31	11.13	8.14	7.24	54	14.93	17.9
chr1.capped.2056	AT1G18660	15.92	13.66	13.75	21.57	15.7	16.73	14.34	15.23	15.91	11.46	6.74	8.43	16.39	11.53	22.29	15.54	19.27	22.81
chr1.capped.2057	AT1G18660	0.72	0.48	0.31	0.1	0.14	0	0.08	0.6	0.41	0.44	0.28	0.36	0.26	0.55	0.42	0.23	0.52	0.84
chr1.capped.2058	AT1G18670	2.33	2.12	1.64	0.5	0.68	0.82	2.72	1.2	1.87	0.11	0.79	0.73	1.05	2.33	0.56	2.49	1.05	3
chr1.capped.206	AT1G02790	2004.42	1812.08	1998.95	1.92	1.8	15.77	66.7	355.32	31.91	7026.2	5528.98	4977.98	4.12	30.08	430.14	113.02	4.84	2.02
chr1.capped.2060	AT1G18690	4.1	3.45	3.81	7.77	6.76	4.98	9.11	9.33	6.81	1.65	2.47	1.82	5.55	8.7	8.36	4.46	4.13	7.63
chr1.capped.2061	AT1G18680	4.83	3.84	4.6	5.63	7.76	3.52	6.74	4.3	4.16	3.63	4.85	3.84	4.77	8.69	8.19	6.6	5.74	7.4
chr1.capped.2062	AT1G18700	9.09	6.47	6.21	5.55	5.9	3.88	9.04	7.13	7.6	5.16	6.34	7.12	7.22	8.11	13.58	17.69	5.59	9.31
chr1.capped.2064	AT1G18710	0	0.21	0.23	0	0	0.02	0.08	0	0	0	0	0	0	0	0	0.18	0.26	0.12
chr1.capped.2065	AT1G18720	115.72	117.75	125.38	140.43	156.75	101.98	71.29	89.29	129.19	123.51	113.35	122.26	39.62	32.86	53.57	121.02	54.52	69.77
chr1.capped.2066	AT1G18730	17.83	13.54	20.66	48.11	53.32	29.68	8.98	7.72	11.05	7.78	5.13	3.94	5.56	4.55	3.11	5.49	8.28	14.4
chr1.capped.2067	AT1G18740	21.36	27.65	29.82	3.95	4.72	5.2	11.66	8.09	13.9	11.37	7.11	12.77	9.29	9.26	17.37	20.7	13.87	15.11
chr1.capped.207	AT1G02800	13.66	9.84	3.5	1.52	0.74	1.87	0.25	1.1	1.47	0.11	0.08	0	24.18	22.42	6.79	106.07	27.46	30.94
chr1.capped.2071	AT1G18750	3.94	4.72	8.78	0.8	1.22	0.82	0.65	0.9	0.81	20.12	27.11	16	0.65	0.22	1.12	2.07	0.79	1.8
chr1.capped.2073	AT1G18773	1.07	0.68	0.4	2.94	3.1	1.48	0.5	0.8	0.4	0.33	0.07	0.21	1.17	0.62	1.26	1.51	1.59	3.59
chr1.capped.2074	AT1G18800	21.63	16.27	18.42	13.13	14.21	10.72	9.12	11.16	16.37	7.01	5.3	6.64	21.09	20.46	26.49	29.93	18.4	22.51
chr1.capped.2075	AT1G18810	0.89	0.47	0.46	0.5	0.87	0.34	0.58	1.5	1.22	0.55	0.07	0	0	0.11	0	0.06	0	0
chr1.capped.2076	AT1G05443	0.36	0.13	0.23	0.3	0.75	0.14	1.16	0.25	0.33	0	0.28	0.22	0.39	0	0.16	0.49	0.92	0.24
chr1.capped.2077	AT1G05443	0.09	0.21	0	0.1	0.07	0.12	0.08	0	0	0.11	0.07	0	0	0	0	0.13	0.26	0.48
chr1.capped.2078	AT1G18840	9.66	7.09	7.82	1.61	1.61	0.52	13.16	12.6	14.35	4.64	4.93	4.86	7.51	10.3	9.06	11.85	5.46	5.92
chr1.capped.2079	AT1G18840	0.81	0.62	1.01	0.5	0.54	0.17	0.82	0.7	0.56	0.44	0.28	0.21	1.04	0.33	1.4	0.63	0.39	0.72
chr1.capped.208	AT1G02810	3.02	3.36	3.26	0	0.03	0.1	0.16	0.3	0.65	0.98	0.42	1.77	1.93	2.24	22.39	1.34	0.4	0.95
chr1.capped.2080	AT1G18850	4.08	4.25	1.62	1	1.08	1.13	1.83	1.2	0.81	0.44	0.7	1.1	1.68	2.33	1.41	6.72	3.06	5.02
chr1.capped.2081	AT1G18870	0.81	0.6	0.48	0.3	0.27	0.04	0.08	0.1	0	0	0.07	0.29	0.78	0.33	0.14	4.09	1.59	1.43
chr1.capped.2082	AT1G18880	0.27	0.68	0.08	0.91	0.88	0.8	0.33	0.38	0.32	0.22	0.14	0.07	0.26	0	0.14	1.09	0	0.06
chr1.capped.2083	AT1G18890	9.63	8.19	8.49	5.05	4.49	3.78	6.3	3.2	7.1	5.36	2.03	3	7.98	9.38	28.33	5.75	2.8	6.08
chr1.capped.2084	AT1G18900	2.59	2.42	1.84	1	0.67	0.56	2.32	2.1	1.87	0.55	0.77	0.8	1.68	0.99	3.39	4.26	1.73	2.26
chr1.capped.2085	AT1G18950	4.43	2.78	2.08	1.72	3.03	2.29	3.29	2.48	2.53	0.99	2.04	1.66	3.37	2.22	2.81	6.25	3.59	6.81
chr1.capped.2086	AT1G18950	0.63	0.47	0.93	1.4	0.87	0.67	1.23	0.6	0.81	1.21	0.79	0.65	1.04	0.46	1.28	0.44	0.39	0.72
chr1.capped.2088	AT1G18960	0	0	0	0	0	0.02	0.08	0	0	0	0	0	0	0	0	0	0	0
chr1.capped.2089	AT1G18990	30.8	36.89	39.3	0	0.07	0.55	0.49	9.13	0.33	182.27	112.03	80.82	0	0.33	11.89	7.05	0.13	0
chr1.capped.209	AT1G02810	1.34	0.57	0.54	0.2	0.07	0.09	0.58	0.4	0.41	0.33	0.42	0.66	3.99	4.58	7.08	2.92	1.86	3.58
chr1.capped.2090	AT1G19000	13.27	12.12	14.46	33.27	42.53	28.07	31.05	22.59	20.6	10.05	10.18	8.28	25.35	28.3	25.37	22.56	13.16	29.12
chr1.capped.2091	AT1G19010	2.96	2.17	2.92	1.44	1.23	0.95	2.05	1.9	1.79	2.97	4.37	2.69	2.2	2.88	1.69	2.97	1.83	3.46
chr1.capped.2092	AT1G19010	0.37	0.53	0.64	2.9	2.83	1.54	0.9	0.5	0.52	0.9	1.34	0.78	1.16	0.44	0.84	0.08	0.03	0.24
chr1.capped.2093	AT1G19020	18.62	12.79	26.68	25.84	23.88	37.86	1.08	0.2	0.66	19.45	3.53	2.06	1.03	0.55	1.56	0.97	1.21	0.48
chr1.capped.2095	AT1G19020	1.17	1.08	0.31	0.7	0.34	0.2	0.9	0.6	0.89	0	0.56	0.42	0.91	1.77	1.55	1.29	0.91	0.6
chr1.capped.2097	AT1G19050	2.43	1.7	2.39	0.6	0.88	0.55	19.82	1.4	2.28	0.05	1.89	0.14	19.23	12.43	21.5	4.78	1.93	0.48
chr1.capped.2098	AT1G19080	7.84	5.96	6.64	6.45	4.73	3.82	8.25	8.22	6.74	7.34	7.9	8.79	9.77	8.61	17.47	8.49	5.47	9.53
chr1.capped.21	AT1G01150	7.26	1.79	5.42	0	0.07	0.04	1.88	0.3	0.32	7.14	5.78	9.19	0	0	0	0.08	0.39	0.12
chr1.capped.210	AT1G02813	0	0	0	0	0	0	0.08	0.1	0.08	0	0.07	0.07	0	0	0	0.02	0	0
chr1.capped.2100	AT1G19100	0.97	1.79	0.67	0.91	1.1	0.79	0.92	0.23	0.84	0.57	0.47	0.46	7.09	7.69	16.86	4.38	1.05	2.39
chr1.capped.2101	AT1G19110	24.6	19.65	20.52	10.77	9.55	11.33	28.95	19.74	24.52	45.77	28.4	23.61	18.42	13.31	56.81	14.7	8.02	17.13
chr1.capped.2102	AT1G19120	29.26	23.95	22.9	23.71	25.98	14.29	30.65	29.87	31.99	11.07	11.31	11.8	34.36	42.21	45.03	56.83	26.16	37.32
chr1.capped.2103	AT1G19130	21.27	17.28	20.39	27.89	30.25	18.99	25.51	25.09	26.61	14.11	11.51	9.96	23.67	26.94	34.45	33.99	17.74	27.34
chr1.capped.2104	AT1G19140	13.82	11.75	11.53	7.64	6.63	4.41	8.4	6.8	9.57	13.9	13.55	13.3	14.82	13.44	22.79	18.31	6.39	9.64
chr1.capped.2105	AT1G19150	5.45	5.4	6.95	31.23	31.19	8.74	1.4	0.4	1.06	0.22	0.28	0.35	2.32	0.78	1.27	3.5	1.59	3.57
chr1.capped.2106	AT1G19170	4.12	2.98	4.08	3.52	4.62	2.39	6.39	4.3	3.82	2.74	1.82	1.66	4.02	3.19	6.52	5.97	1.45	3.94
chr1.capped.2107	AT1G19180	178.57	165.02	214.23	157.06	157.34	127.38	151.49	134.93	188.14	226.68	123.72	180.91	75.1	69.32	424.19	42.94	37.22	35.27
chr1.capped.2108	AT1G19180	10.78	9.41	13.48	6.47	5.62	3.95	4.73	6.22	8.38	12.57	13.36	15.07	7.33	4.69	32.34	1.27	0.53	1.32
chr1.capped.2109	AT1G19190	0	0	0.16	0.4	0.34	0.17	0	0.1	0.16	0	0.07	0	0	0	0.28	0.02	0	0
chr1.capped.211	AT1G02816	34.23	30	39.09	54.94	59.1	55.47	49.23	47.57	31.61	46.02	57.53	34.13	15.84	24.66	39.95	10.98	9.36	16.19
chr1.capped.2111	AT1G19200	1.25	0.95	1.92	3.92	5.43	4.69	0.4	0.5	0.08	1.48	1.4	2.25	0	0	0	0.08	0.26	0.24
chr1.capped.2112	AT1G19210	1.17	0.81	0.79	0.2	0.48	0.22	0.57	0.8	0.97	0.44	0	0.37	0	0.22	0.14	0.48	0.65	2.27
chr1.capped.2113	AT1G19220	2.51	2.45	2.16	3.72	3.52	4.55	4.7	3.8	3.5	2.62	1.32	1.56	5.81	3.68	4.39	1.48	2.52	4.89
chr1.capped.2114	AT1G19240	9.55	7.61	8.16	8.07	9.03	5.58	10.51	10.02	9.68	2.97	3.87	2.3	14.16	15.31	12.16	23.97	14.57	14.53
chr1.capped.2115	AT1G19270	4.42	2.23	3.96	2.69	4.44	2.29	2.33	1.6	1.48	2.27	3	2.64	1.82	2.18	2.16	0.44	1.34	2.88
chr1.capped.2116	AT1G19270	0.99	0.95	1.25	0.6	0.81	0.58	1.24	1.1	1.04	1.54	0.91	1.03	1.43	1.77	1.82	0.71	0.53	0.36
chr1.capped.2117	AT1G19290	1.34	0.95	0.93	0.5	0.48	0.25	1.08	0.7	0.73	0.88	0.21	0.14	0.52	0.55	0.85	1.99	0.94	2.39
chr1.capped.2118	AT1G19300	17.65	17.43	12.75	9.47	12.44	7.57	9.05	8.93	13.38	15.4	4.46	7.71	40.7	38.01	61.94	20.98	10.59	12.6
chr1.capped.2119	AT1G19300	3.48	2.23	2.13	3.13	1.28	0.9	0.91	1.5	1.3	2.73	0.84	1.63	9.91	12.3	34.32	2.85	2.15	1.9
chr1.capped.2120	AT1G19310	17.18	16.92	18.68	14.33	17.4	8.91	28.05	19.93	20.13	17.06	18.58	15.18	16.87	20.87	30.45	24.23	8.72	14.28
chr1.capped.2121	AT1G19330	7.89	8.33	5.28	0.41	1.15	0.86	0.73	1.9	2.34	0.66	0.49	0.82	4	4.68	4.11	37.28	20.61	23.69
chr1.capped.2122	AT1G19340	0.9	0.56	0.32	0.4	0.62	0.04	0.17	0.1	0.32	0	0.07	0.14	0.52	0	0.42	2.52	0.79	1.44
chr1.capped.2123	AT1G19350	2.31	2.28	2.22	3.54	3.13	2.17	3.75	2.61	1.96	2.84	1.9	1.33	0.77	0.22	1.41	1.49	0.39	0.36
chr1.capped.2124	AT1G19350	19.87	16.17	17.7	5.57	5.81	5.69	24.22	20.59	18.4	8.33	8.45	8.68	13.56	16.33	17.57	55.65	22.86	34.92
chr1.capped.2125	AT1G19360	9.91	10.19	9.22	9.92	10.25	6.97	9.83	9.26	7.97	6.34	4.56	3.56	10.8	10.3	15.8	20.15	8.19	12.43
chr1.capped.2127	AT1G19370	6.74	5.56	7.6	7.42	6.79	3.12	9.87	6	10.54	5.39	5.04	5.03	6.09	5.54	13.99	6.67	4.77	4.91
chr1.capped.213	AT1G02820	0.27	0.34	0.39	0.4	0.4	0.28	0	0	0	0.22	0.07	0	0	0.11	0	0.94	0.67	0.24
chr1.capped.2130	AT1G19380	64.97	46.42	87.52	61.53	54.37	45.57	15.65	9.67	18.07	25.58	6.28	8.83	31.94	34.57	35.67	14.14	6.17	7.64
chr1.capped.2131	AT1G19394	22.61	22.38	26.34	21.73	20.92	18.8	28.4	21.98	17.49	48.51	42.4	30.33	18.26	30.05	34.59	13.73	20.54	31.61
chr1.capped.2132	AT1G19400	1.62	1.66	1.85	4.53	5.29	1.56	4.39	2.9	2.11	0	1.05	0.07	3.62	5.92	2.84	3.78	5.08	9.17
chr1.capped.2133	AT1G19400	4.38	3.51	5.59	15.89	16.28	8.85	14.74	6.64	5.91	5.17	7.67	1.43	12.02	15.7	17.39	10.75	6.73	9.29
chr1.capped.2134	AT1G19410	3.68	2.64	2.75	3.3	3.36	2.52	5.17	4.5	3.51	1.65	3.43	2.43	8.55	12.18	11.04	9.17	9.23	14.89
chr1.capped.2135	.	1.86	1.65	2.42	3.8	5.22	2.35	6.05	4.11	3.92	1.36	0.99	0.72	0.26	0.33	0.14	1.54	1.19	1.19
chr1.capped.2136	AT1G19430	4.86	4.69	5.13	4.12	5.22	3.41	7.62	7.9	7.46	4.95	2.94	3.34	4.79	4.29	9.01	3.19	5.97	5.04
chr1.capped.2137	AT1G19440	4.01	3.5	3.74	1.41	1.34	0.59	1.33	2.51	1.89	5.26	3.65	4.2	1.03	0.44	0.98	3.27	1.46	2.86
chr1.capped.2138	AT1G19440	1.62	1.43	1.72	0.81	0.41	0.32	0.42	0.9	0.57	1.21	1.49	1.69	0.13	0	0.28	1.12	0.13	0.37
chr1.capped.2139	AT1G19450	10.68	12.54	10.94	8.06	13.56	4.44	4.55	3.41	6.24	21	13.94	11.3	6.58	3.14	5.5	4.75	0.93	1.32
chr1.capped.214	AT1G02840	32.3	29.61	23.55	18.8	17.39	15.16	30.94	24.11	24.05	16.72	18.24	17.26	24.53	23.43	21.28	77.35	35.96	58.35
chr1.capped.2140	AT1G19460	0.09	0	0	0	0	0	0	0	0	0	0	0	0	0	0	0	0	0
chr1.capped.2141	AT1G19480	2.77	2.96	2.08	3.12	4.03	2.57	2.81	2.2	1.7	0.99	1.48	1.24	2.45	2.44	4.96	5.7	2.96	4.54
chr1.capped.2142	AT1G19485	4.02	3.04	2.77	4.23	3.69	2.83	4.23	3.81	4.26	2.3	2.54	1.76	2.59	5	4.45	8.81	3.6	7.64
chr1.capped.2144	AT1G19485	1.07	1.55	1.59	1.11	0.66	1.03	2.24	1.6	1.4	0.55	0.63	0.81	1.16	1.56	0.85	4.04	3.49	3.34
chr1.capped.2145	AT1G19490	0.36	0.57	0.24	0.2	0.14	0.28	0.66	0.9	0.56	0	0.16	0.07	0.78	1.25	0.42	0.88	0.52	0.91
chr1.capped.2146	AT1G19500	122.31	131.04	168.35	0.1	0.14	1.58	1.14	30.23	2.92	578.87	409.99	306.19	0.65	6.1	33.58	14.07	0.52	0.48
chr1.capped.2147	AT1G19510	1.71	1.43	3.52	9.29	10.48	11.95	0.19	0.3	0.24	2.53	0.77	0.87	0	0	0.14	0.02	0.26	0.12
chr1.capped.2148	AT1G19520	7.95	7.05	5.22	2.61	3.22	1.54	4.14	4.81	5.72	1.86	1.54	2.39	6.47	5.56	6.35	11.08	6.23	7.28
chr1.capped.2149	AT1G19540	3.11	3.72	5.1	6.98	8.87	6.69	6.39	4.91	4.86	1.97	2.55	1.78	1.8	2.68	7.37	4.57	2.41	5.24
chr1.capped.215	AT1G02850	4.38	4.43	2.52	4.95	5.02	7.22	0.41	0.5	0.72	1.76	0.63	1.17	0.78	0.89	1.55	1.76	1.73	8.1
chr1.capped.2151	.	0.36	0.34	0.24	0.42	0.74	0.59	0.91	0	0.16	0.22	0.21	0.14	0	0	0.28	0.02	0	0
chr1.capped.2152	AT1G19570	423.15	385.26	403.5	354.37	409.88	163.74	287.52	168.81	294.86	343.28	181.3	247.21	252.12	244	183.36	919.04	564.04	881.91
chr1.capped.2153	AT1G19580	26.65	19.82	24.44	16.46	16.89	9.04	24.9	16.04	22.69	16.45	13.14	10.69	14.42	14.19	30.93	30.89	17.7	29.73
chr1.capped.2154	AT1G19600	5.6	4.31	3.96	6.04	4.76	3.29	5.14	4.5	3.12	1.76	2.39	2.28	6.45	10.83	6.22	19.03	5.73	14.43
chr1.capped.2155	.	0.27	0.98	2.26	0.4	0.28	0.72	0.57	0.9	0.96	0.33	10.73	10.46	0.13	0	0.7	0.48	1.18	1.08
chr1.capped.2156	AT1G19640	7.23	8.96	11.31	0.1	0.07	0.27	0.08	2.3	0.24	36.07	30.9	14.87	0	0.33	0.7	5.28	0	0.12
chr1.capped.2157	AT1G19640	3.02	2.76	5.1	2.42	2.88	0.54	0	0.3	1.48	3.49	2.34	2.07	0	0	0	1.64	0.13	0.6
chr1.capped.216	AT1G02860	7.13	5.66	8.79	15.34	15.4	12.29	11.86	5.51	7.17	9.2	4.15	2.28	2.2	3.32	4.66	5.7	4.13	11.67
chr1.capped.2160	AT1G19650	6.26	3.93	6.29	2.41	2.5	1.43	3.48	4.71	7.56	7.33	5.43	6.16	2.07	0.77	0.56	1.82	0.93	2.99
chr1.capped.2162	AT1G19660	9.2	8.12	7.86	31.1	34.93	29.81	29.64	19.06	10.01	5.37	6.71	4.51	17.24	29.51	17.26	46.87	26.38	37.7
chr1.capped.2163	AT1G19670	21.22	17.64	11.8	25.95	32.89	5.34	4.12	6.01	4.9	3.06	4.15	5.4	9.14	14.84	4.81	52.85	49.79	63.12
chr1.capped.2164	AT1G19680	12.14	9.6	8.39	7.55	10.3	6.01	12.67	11.22	7.2	12.58	12.48	9.64	9.87	14.58	12.87	27.84	13.64	27.73
chr1.capped.2166	AT1G19690	2.06	1.74	2.97	0.9	1.62	1.23	3.97	3.4	2.21	1.54	1.76	1.97	0.78	1.1	1.98	2.9	1.87	2.62
chr1.capped.2167	AT1G19700	0.18	0.21	0.08	0.1	0.48	0.12	0.08	0.1	0.08	0.11	0.07	0	0.13	0.33	0.14	0.75	0.26	0.36
chr1.capped.2168	AT1G19700	4.44	3.65	2.72	5.53	6.59	3.98	5.19	4.5	3.88	3.74	1.96	1.51	5.05	8.11	8.75	6.8	2.92	7.89
chr1.capped.2169	AT1G19710	3.31	1.82	3.25	2.92	3.67	1.6	3.23	3.51	4.48	2.74	1.27	1.54	8.4	5.68	8.35	7.65	2.94	2.87
chr1.capped.217	AT1G02870	15.22	12.63	10.47	10.19	9.42	7.08	9.54	6.71	9.2	3.28	3.6	3.76	12.37	12.73	10.34	26.13	16.36	31.62
chr1.capped.2170	AT1G19715	0.54	0.21	0.62	0.6	1.4	0.26	0	0.1	0.08	0.11	0.14	0	0	0.11	0.14	0.1	0.13	0.12
chr1.capped.2171	AT1G19720	3.22	4.5	4.06	6.04	7.96	4.68	4.05	4.53	3.1	1.42	1.42	1.44	3.75	4.18	4.52	6.45	6.82	9.53
chr1.capped.2172	AT1G19740	13.28	11.1	9.08	37.39	37.83	20.08	16.6	11.54	13.15	5.59	5.57	3.68	11.84	13.28	15.14	18.6	7.22	12.85
chr1.capped.2173	AT1G19730	25.96	16.87	22.2	17.38	17.43	11.13	20.75	19.08	22.1	21.31	16.85	15.38	25.21	30.63	27.79	33.79	22.84	30.65
chr1.capped.2175	AT1G19750	0.45	0.14	0.63	0.7	0.21	0.09	0.16	0.3	0.08	0.33	0.14	0.15	0.39	0.45	0.95	0.56	0.4	0.24
chr1.capped.2176	AT1G19770	31.96	33.7	33.83	36.47	40.77	34.32	49.23	24.49	26.44	15.41	12.74	8.39	25.21	31.87	49.9	61.61	37.6	33.5
chr1.capped.2177	AT1G19780	2.32	2.85	4.97	0	0	0	0.08	0.3	0.24	11.25	13.72	10.11	0.13	0	0.57	1.21	0	0
chr1.capped.2178	AT1G19790	0.73	1.09	1.02	0.2	0.07	0.19	0	0	0.16	0	0.07	0	41.33	35.86	71.99	1.04	1.2	0.48
chr1.capped.2179	AT1G19790	0.36	0.22	0	0.1	0.07	0.06	0	0.1	0	0	0	0.14	8.27	8.65	21.78	1.25	0.95	0.61
chr1.capped.218	.	3.22	2.03	2.47	1.73	2.58	1.64	2.99	2.03	1.68	2.13	3.27	1.89	3.25	2.73	2.15	2.16	3.72	2.53
chr1.capped.2180	AT1G19800	4.73	5.84	6.42	6.97	8.79	4.8	11.04	8.78	9.33	3.18	2.92	3.29	7.58	10.07	10.74	20.04	6.03	10.11
chr1.capped.2182	AT1G19830	0.9	0.56	0.54	0.2	0.07	0.06	0.08	0.3	0.08	0.11	0.49	0.07	0.13	0.11	0.28	3.59	1.54	1.56
chr1.capped.2183	AT1G19835	4.11	4.29	3.71	2.51	3.21	2.55	6.46	5.59	6.54	0.99	1.33	2.71	0.13	0.36	0.28	2.35	1.59	1.13
chr1.capped.2184	AT1G19835	16.58	18.72	14.13	5.65	6.9	2.38	13.1	15.65	22.84	5.15	4.57	5.89	1.43	1.9	2.11	30.77	11.88	12.04
chr1.capped.2185	AT1G19840	1.16	0.55	0.23	1	0.07	0.18	0.41	0.7	0.89	1.1	0.92	0.95	0.39	0.33	0.42	0.93	0.67	0.84
chr1.capped.2186	AT1G19850	18.32	12.36	6.13	3.81	2.71	1.89	0.73	0	0.56	19.12	7.65	18.07	0.65	0.77	1.13	15.63	11.61	19.17
chr1.capped.2187	AT1G19850	0.99	0.34	0.08	0	0.13	0.06	0	0.3	0	0.55	0.14	0.35	0.26	0.22	0	0.46	0.79	0.84
chr1.capped.2188	AT1G19860	3.32	3.47	2.7	2.11	2.75	1.53	2.48	1.9	2.78	4.28	3.31	2.2	1.69	1.54	3.95	3.87	1.72	2.75
chr1.capped.2189	AT1G19870	12.16	10.55	11.03	4.6	7.56	5.33	23.21	17.21	18.85	4.61	5.73	4.56	9.29	6.74	10.93	23.51	11.42	18.65
chr1.capped.219	AT1G02880	4.34	4.92	4.32	3.03	2.68	3	5.99	3.52	3.38	1.65	1.62	2.05	11.44	11.7	13.76	9.23	3.32	4.77
chr1.capped.2190	AT1G19880	9.88	6.44	5.2	3.22	4.71	3.53	10.52	8.43	5.72	4.72	4.4	5.93	5.35	5.85	5.97	11.77	5.85	14.57
chr1.capped.2191	AT1G19890	22.87	18.9	24.48	0	0	0.3	1.32	3.11	0.49	54.48	87.9	68.02	0	0.22	1.7	3.38	0.13	0
chr1.capped.2192	AT1G19910	147.28	146.41	174.72	208.01	208.61	160.57	233.51	193.92	200.8	228.75	212.71	159.96	172.8	190.34	244.03	101.54	67.05	88.77
chr1.capped.2194	AT1G19920	15.94	12.81	9.91	3.8	5.75	2.83	4.59	5.8	5.05	10.62	6.61	9.74	10.07	11.63	16.63	21.78	7.73	11.79
chr1.capped.2195	AT1G19940	7.21	6.44	5.07	0.9	0.62	0.21	0.82	0.6	0.4	13.82	13.59	12.14	3.63	2.45	14.57	2.92	0.26	0.48
chr1.capped.2196	.	0	0	0	0.1	0	0	0.02	0	0	0	0	0	0	0	0	0	0	0
chr1.capped.2197	AT1G19950	2.61	3.7	2.69	2.3	2.53	1.7	2.96	2.2	2.65	0.99	0.56	0.36	2.47	2.9	4.38	5.18	1.32	3.94
chr1.capped.2199	AT1G19960	2.69	3.86	2.53	1.3	2.1	1.81	2.94	1	0.73	0.88	0.14	0.07	13.93	14.94	4.8	9.69	10.14	13.01
chr1.capped.22	AT1G01160	16.89	13.21	11.64	14.65	13.34	9.92	17.67	14.21	14.56	5.44	6.16	4.72	8.59	10.84	10.8	18.2	20.81	32.28
chr1.capped.2200	AT1G19970	10.35	8.86	9.12	2.41	3.52	3.07	4.14	3.11	3.83	9.62	18.44	12.88	13	13.05	11.13	17.05	4.95	6.56
chr1.capped.2201	AT1G19980	4.1	3.63	2.43	2.22	2.93	1.68	2.57	2.35	1.39	2.51	1.42	2.2	1.42	3.91	4.24	4.82	3.87	4.04
chr1.capped.2202	AT1G19990	24.25	21.14	20.41	9.27	10.48	6.41	9.81	12.73	13.4	20.12	21.77	21.04	19.69	19.31	21.96	29.23	30.59	30.2
chr1.capped.2203	AT1G20010	0.54	0.71	0.67	0.3	0.35	0.06	0.98	1.1	1.46	0.22	0.49	0.29	0.39	0	0.14	0.45	0.66	0.12
chr1.capped.2205	AT1G20010	71.33	71.41	71.11	59.92	68.01	29.42	154.6	163.02	154.89	42.11	40.48	29.29	44.16	37.88	47.93	92.65	26.32	45.68
chr1.capped.2206	AT1G20015	4.45	3.7	3.27	2.12	0.93	1.45	1.98	3.4	6.08	1.65	2.04	1.39	1.94	1.33	1.83	1.99	3.34	2.86
chr1.capped.2207	AT1G20020	58.57	64.04	74.09	292.73	359.22	149.53	37.87	18.54	34.94	13.68	9.47	9.95	38.35	28.96	24.8	32.42	17.69	21.2
chr1.capped.2209	AT1G20030	7.63	6.56	5.66	7.93	8.76	2.81	3.38	1	2.44	1.98	0.77	2.63	3.09	2.88	10.47	9.95	5.21	4.25
chr1.capped.221	AT1G02890	5.65	4.41	3.99	5.55	5.2	4.75	7.88	5.61	7.95	5.41	3.67	4.19	7.14	7.98	10.64	7.17	3.35	6.72
chr1.capped.2210	AT1G20050	39.73	30.34	35.35	21.09	23.57	11.8	45.17	39	41.22	20.81	17.86	15.23	37.6	38.56	49.75	68.68	31.55	50.79
chr1.capped.2211	AT1G20060	0.98	0.45	0.5	0	0.14	0.06	0.08	0.2	0.56	0.55	0.14	0.14	0.13	0.11	0.14	2.72	1.17	1.68
chr1.capped.2212	AT1G20065	0.18	0.62	0.16	0	0.14	0.02	0	0	0	0.11	0.07	0.07	0.39	0.22	0.14	1.12	0.39	0.72
chr1.capped.2213	AT1G20070	5.18	4.6	4.21	2.22	2.48	0.94	4.13	1.91	2.78	7.55	7.79	6.03	0.13	0.34	0.42	0.51	1.61	1.43
chr1.capped.2214	AT1G20080	6.17	5.4	5.07	0.1	0.21	0.11	1.23	0.6	0.16	15.58	22.25	15.37	0	0	0	1.8	0	0.12
chr1.capped.2215	AT1G20090	56.5	47.65	50.63	37.87	49.36	34.51	65.52	73.4	71.57	22.1	21.53	16.7	39.13	35	68.62	60.3	20.38	35.43
chr1.capped.2216	AT1G20100	76.09	60.3	73.99	66.55	66.48	66.82	65.86	62.48	67	87.68	85.89	74.38	54.41	59.04	89.19	41.16	47.54	55.72
chr1.capped.2217	AT1G20110	32.5	32.65	29.71	33.74	33.6	24.34	38.78	32.44	37.28	32.04	26.84	23.95	30.74	26.02	47.66	37.95	17	28.07
chr1.capped.222	AT1G02900	3.74	2.23	2.15	0.5	0.4	0.16	0.91	0	0.16	3.82	1.13	0.81	0.13	0.45	0.71	3.33	1.88	4.4
chr1.capped.2220	AT1G20120	6.95	0.28	10.99	1.61	1.89	1.58	0.5	0.1	0.24	6.01	0.21	0.57	0	0.11	0	0.06	0	0
chr1.capped.2222	AT1G20130	6.14	0.27	30.04	0	0	0	0.24	1.4	0.08	14.3	0	0.51	0	0.11	0	0.02	0.13	0.12
chr1.capped.2223	AT1G20132	1.71	0.07	0.7	0	0	0.02	0.33	0	0	0.33	0.14	0.72	0	0	0	0	0	0
chr1.capped.2224	AT1G20135	12.38	8.99	9.94	0.4	0.49	0.68	0.4	0.9	1.45	6.81	46.6	59.61	0.39	0.66	0.28	0.26	1.19	1.92
chr1.capped.2226	AT1G20140	14.77	13.99	13.02	7.46	7.79	7.19	9.06	7.97	12.92	9.5	5.95	5.68	12.22	10.38	15.59	26.49	12.56	13.65
chr1.capped.2227	AT1G20150	0	0	0	0	0	0	0.08	0	0	0	0.07	0	0	0	0	0	0	0
chr1.capped.2228	AT1G20160	0.63	1.48	0.76	1.21	1.14	1.38	0.58	0.3	0.41	2.52	1.05	0.51	0.39	0.33	0.14	0.8	0.13	0.24
chr1.capped.2229	AT1G20180	1.16	0.74	0.61	0	0.2	0.31	1.66	1.1	1.07	1.86	0.92	0.96	0	0.11	0	0.31	0.53	0.24
chr1.capped.223	AT1G02910	7.67	6.21	7.11	17.88	18.01	8.6	7.21	6.13	5.82	3.29	2.33	2.33	7.09	7.91	11.74	11.04	5.36	12.73
chr1.capped.2231	AT1G20180	0.37	0.54	0.39	1.91	3.07	0.87	0.08	0.3	0.08	0.88	0.36	0.36	0.13	0	0	0.14	0.13	0
chr1.capped.2232	AT1G20190	29.3	37.17	40.08	49.73	57.25	47.01	72.79	98.04	108.18	65.16	52.98	40.43	3.24	2.81	7.75	5.03	1.19	2.02
chr1.capped.2233	AT1G20200	27.18	23.34	23.61	14.54	17.52	15	22.97	19.37	25.68	17.05	15.75	14.28	21.11	18.75	33.45	55.78	16.34	28.46
chr1.capped.2234	AT1G20220	21.92	19.44	14.5	6.66	7.9	5.28	8.55	7.73	6.88	17.7	20.21	21.36	11.59	9.72	12.73	29.47	12.33	18.79
chr1.capped.2235	AT1G20225	20.29	17.62	19.91	23.65	31.23	20.83	23.56	20.16	25.97	21.41	21	20.4	35.96	40.21	63.76	31.06	12.23	16.5
chr1.capped.2236	AT1G20230	0.72	1.21	0.55	0.3	0.34	0.15	0.66	0.6	0.9	0.33	0.07	0.14	0.26	1	0.85	1.26	0.4	0.72
chr1.capped.2237	AT1G20260	34.35	27.94	30.74	27.66	34.13	17.87	33.78	29.78	37.93	30.22	25.09	24.5	36.67	34.09	60.65	34.11	11.61	18.58
chr1.capped.2238	AT1G20270	8.47	7.08	8.43	6.84	6.59	3.44	8.27	5.31	10.07	7.01	8.1	6.07	9.42	9.82	21.68	7.24	4.23	7.04
chr1.capped.224	AT1G02930	1.52	0.74	2.9	6.34	8.6	33.28	0	0.1	0.25	2.82	1.39	0.07	0.77	0.45	0.28	0.33	0.13	0.83
chr1.capped.2240	AT1G20300	2.6	2.35	1.7	1.9	2.21	1.02	2.14	2.6	2.28	0.88	1.12	0.96	2.72	3.1	10.18	7.59	2.78	4.41
chr1.capped.2241	AT1G20310	2.72	3.1	3.66	0.5	1.26	2.57	0.41	0.2	0.08	1.42	0.42	0.29	31.79	46.06	150.46	0.4	0.39	0.12
chr1.capped.2243	AT1G20320	0.45	0.41	0.32	0	0	0	0.32	0.2	0.08	0.88	1.69	0.95	0	0.11	0.28	0.04	0	0
chr1.capped.2244	AT1G20330	0.45	0.56	1.24	0.3	0.28	0.48	1.65	0.7	1.54	0	0.63	0.43	0.39	0.66	0.42	0.87	2.79	1.31
chr1.capped.2245	AT1G20330	53.2	61.52	63.92	20.99	22.83	16.16	133.52	101.52	103.46	24.22	30.34	23.37	44.91	49.9	69.43	69.29	25.54	31.86
chr1.capped.2246	AT1G20340	478.83	481.38	605.82	1494.15	1443.84	597.65	622.06	400.27	451.41	195.36	186.5	135.86	453.23	425.7	443.03	319.49	221.95	350.59
chr1.capped.2247	AT1G20350	5.9	4.18	2.08	0.8	0.89	0.77	0.24	0	0.16	0	0	0	0.52	1.54	6.23	26.28	13.91	14.64
chr1.capped.2248	AT1G20370	3.14	2.7	1.23	1	1.61	0.85	1.65	0.2	1.37	0.55	0.28	0.87	2.85	2.88	3.24	5.12	0.92	2.51
chr1.capped.2249	AT1G20380	0.54	0.68	0.38	0.6	0.07	0.22	0.73	1	0.32	0.22	0.35	0.14	1.42	1.33	1.69	1.23	0.78	1.08
chr1.capped.225	AT1G02952	0	0	0	0	0	0	0	0	0	0.11	0.07	0	0	0	0	0	0	0
chr1.capped.2250	.	1.16	0.96	1.1	0.68	0.54	0.39	0.92	0.8	1.39	1.21	1.06	3.02	0.38	0.4	0.85	0.63	0.66	1.49
chr1.capped.2252	AT1G20410	4.19	2.97	2.68	3.31	3.76	1.88	1.58	1.9	3.26	1.54	0.98	1.54	5.93	4.78	8.05	7.72	3.46	4.89
chr1.capped.2253	AT1G20430	31.35	26.89	24.44	12.07	12.67	9.39	27.69	25	26.42	18.09	11.65	12.39	35.43	39.68	34.72	37.42	33.95	40
chr1.capped.2254	AT1G20440	255.43	297.23	318.61	112.77	103.5	197.2	257.55	194.72	329.19	664.91	368.88	333.63	24.95	9.72	81.67	5.05	6.85	12.59
chr1.capped.2255	AT1G20440	13.1	12.58	7.45	0.2	0.07	0.14	0	0.9	0.32	17.26	13.73	10.2	0	0	0	0	0.13	0
chr1.capped.2256	AT1G20450	696.09	763.51	948.19	482.22	543.4	453.73	395.41	224.57	768.74	930.4	477.56	517.02	172.65	77.62	696.34	167.22	40.32	56.9
chr1.capped.2257	AT1G20460	16.5	11.63	13.17	11.01	12.3	12.92	15.94	11.63	12.91	22.43	22.75	16.26	14.29	15.53	21.42	11.98	9.66	16.54
chr1.capped.2258	AT1G20470	0.09	0.13	0	1.21	1.34	0.78	0	0	0	0.22	0	0.15	0.26	0.22	0	0.02	0	0
chr1.capped.2259	AT1G20480	2.25	2.82	2.01	1.3	1.68	0.72	5.14	2.7	2.02	3.62	3.44	1.9	8.37	10.59	14.2	3.54	1.46	2.51
chr1.capped.226	AT1G02950	2.05	1.76	1.68	3.93	3.36	1.94	2.64	2.4	1.8	0.66	0.84	0.65	0.78	0.22	0.42	2.95	1.99	1.79
chr1.capped.2260	AT1G20490	2.15	3.02	4.28	0.1	0.07	0.15	0	0.8	0	9.97	9.67	6.03	0.13	0.11	0.56	1.15	0	0.24
chr1.capped.2261	AT1G20490	0.45	0.41	0.87	0.8	1.07	0.89	0.91	1.2	2.22	0.55	0.77	0.36	1.29	1.44	0.64	2.21	1.61	5.11
chr1.capped.2262	AT1G20500	0	0	0	0	0	0	0	0	0	0	0	0	0	0	0	0	0	0
chr1.capped.2263	AT1G20510	51.11	51.39	48.85	18.48	17.98	9.09	15.59	9.73	22.01	7.11	4.08	14.56	18.03	19.66	25.35	21.72	18.48	15.23
chr1.capped.2264	AT1G20515	0.72	0.34	0.78	0.7	1.22	0.31	1.07	0.3	0.24	0.22	0.14	0.14	1.55	1.56	1.69	2.11	1.18	1.2
chr1.capped.2265	AT1G20530	0.27	0.21	0	0.1	0.14	0.02	0.08	0.1	0	0.11	0.21	0.07	0	0	0.14	1.12	0.39	0.36
chr1.capped.2266	AT1G20540	8.73	6.87	7.16	4.14	6.35	3.37	9.14	6.92	6.17	5.03	7.01	5.73	9.89	9.49	11.06	26.01	10.17	14.26
chr1.capped.2268	AT1G20550	2.98	1.73	2.11	0.7	1.3	0.93	1.4	2.32	1.95	1.87	1.78	1.39	1.83	2.15	2.72	1.93	1.61	3.82
chr1.capped.2269	AT1G20560	2.42	3.71	2.77	3.01	5.3	3.85	3.32	2.3	2.51	1.43	1.55	1.52	3.38	2	3.23	6.95	2.11	5.97
chr1.capped.227	AT1G02960	4.56	3.9	4.7	5.83	6.75	3.91	9.35	5.7	6.04	3.6	2.64	2.57	5.18	5.35	5.95	9.19	6.24	8.92
chr1.capped.2270	AT1G20575	14.6	11.73	14.25	11.82	12.71	7.53	13.62	11.74	12.66	14	16.03	14.78	11.6	12.06	19	22.48	9.64	15.01
chr1.capped.2271	AT1G20580	43.53	33.9	33.01	21.42	27.32	19.18	33.8	35.46	38.67	21.62	14.72	17.17	28.94	40.25	40.99	113.74	48.9	62.5
chr1.capped.2272	AT1G20610	3.72	3.51	1.31	0.96	1.63	0.52	0.91	0.75	1.22	2.19	2.04	3.94	0.52	1.62	1.56	13.57	8.66	8.73
chr1.capped.2273	AT1G20620	74.84	71.82	65.67	320.1	327.25	208.91	163.03	71.54	64.82	14.75	32.8	15.31	108.39	93.95	52.33	107.69	73.66	339.22
chr1.capped.2274	AT1G20620	4.57	4.12	3	3.72	4.69	1.64	4.92	4	4.65	4.18	5.33	4.23	4.41	2.87	7.05	7.91	4.13	3.6
chr1.capped.2275	AT1G20630	77.57	74.76	70.89	111.02	108.14	84.14	67.32	56.63	64.4	185.98	131.08	127.57	131.61	172.97	387.96	41.99	22.35	29.95
chr1.capped.2276	AT1G20640	1.08	1.02	1.17	1.2	1.69	0.74	0.89	1.1	0.48	1.32	1.33	0.94	1.17	1	0.56	1.02	0.26	2.04
chr1.capped.2277	AT1G20640	1.03	1.02	1.53	1.51	1.49	0.71	1.97	2	2.2	1.4	1.33	0.59	1.3	0.89	2.54	1.18	1.18	1.44
chr1.capped.2278	AT1G20650	5.73	3.61	3.85	6.83	5.98	3.93	6.01	5.11	6.09	0.99	1.05	0.79	9.7	11.23	8.04	5.37	8.9	18.56
chr1.capped.2279	AT1G20670	5.52	6.53	4.03	4.75	3	2.63	7.67	8.06	6.77	5.21	8.34	4.84	8.53	11.2	14.65	2.47	7.85	10.51
chr1.capped.228	AT1G02970	0.6	0.54	0.84	0	0	0.07	0.4	0.2	0.32	0.44	0.28	0.3	0.26	0.55	0.14	2.54	1.32	0.48
chr1.capped.2280	AT1G20680	1.78	1.75	0.53	0.1	0.07	0.34	1.17	0	0.24	0.87	0.28	0	0.65	0	0	9.13	2.28	2.62
chr1.capped.2282	AT1G20691	8.28	8.08	6.41	11.32	15.69	7.27	8.56	11.15	7.08	1.64	3.68	2.37	5.79	10.18	4.53	28.26	20.03	21.75
chr1.capped.2283	AT1G20693	127.73	126.92	110.48	185.47	231.44	179.04	87.27	119.59	99.61	52.95	51.59	57.91	193.01	237.59	225.73	228.9	146.73	230.23
chr1.capped.2284	AT1G20696	130.41	124.02	121.54	115.07	141.3	101.85	99.13	95.61	96.68	65.95	75.78	75.95	125.88	185.46	176.54	249.27	132.64	183.86
chr1.capped.2285	AT1G20700	0.18	0.47	0	0	0	0.02	0.24	0.1	0.08	0.11	0	0.16	0	0.11	0	0.17	0	0
chr1.capped.2286	AT1G20720	0.55	0.67	0.85	0.2	0.2	0.04	0.16	0.6	0.8	0.77	0.28	0.38	0.65	0.55	0.89	0.94	0.52	1.2
chr1.capped.2288	AT1G20760	6.87	7.03	5.75	5.03	4.31	3.8	11.6	7.22	8.94	8.66	6.98	6.1	7.99	6.24	12.88	8.51	5.07	7.87
chr1.capped.2289	AT1G20770	12.8	10.91	12.01	10.07	9.35	6.94	11.84	9.93	9.76	10.61	9.87	10.68	13.41	13.61	13.45	14.17	10.15	13.2
chr1.capped.229	AT1G02990	7.42	5.1	5.76	8.14	7.74	4.97	5.25	6.13	5.11	6.27	5.89	5.43	3.24	3.65	3.94	6.24	5.44	7.66
chr1.capped.2290	AT1G20780	5.8	5.13	4.3	3.71	4.5	2.76	8.96	5.2	5.3	2.42	1.48	1.66	2.85	2.45	5.35	4.3	1.6	3.35
chr1.capped.2291	AT1G20790	0.36	0.54	0.24	0	0.07	0.14	0.5	0.3	0.33	0.22	0.21	0.14	0.52	0.56	0.14	0.66	1.47	0.48
chr1.capped.2292	AT1G20810	7.39	5.43	7.7	24.74	23.45	12.2	10.01	8.03	7.04	3.28	3.24	1.68	13.53	16.84	15.16	12.58	7.52	12.12
chr1.capped.2293	AT1G20816	10.61	9.66	10.02	10.2	11.1	6.59	8.7	8.02	10.74	2.09	2.03	1.61	32.69	41.5	57.83	10.08	9.9	13.22
chr1.capped.2294	AT1G20823	7.9	9.44	13.07	1.32	1.04	2.43	1.41	3.82	6.04	1.64	1.05	2.65	120.88	167.49	243.69	3.82	1.2	1.64
chr1.capped.2295	AT1G20830	2.59	2.68	3.73	4.44	5.35	2.92	4.22	4.82	2.95	1.97	2.75	1.39	3.09	4.14	3.54	6.14	4.15	5.25
chr1.capped.2296	AT1G20840	0.99	0.48	0.39	0.7	0.53	0.78	1.89	1.4	0.72	1.1	0.42	1.38	0.65	0.56	1.12	0.96	0	0.12
chr1.capped.2297	AT1G20840	12.62	13.23	13.52	30.77	34.67	23.83	31.78	35.9	21.65	20.98	25.74	11.43	7.64	7.09	8.76	10.59	7.7	15.26
chr1.capped.2298	AT1G20850	32.21	27.77	39.91	30.14	25.02	21.39	105.57	58.77	105.9	10.69	15.51	11.1	29.45	3.13	16.87	4.59	2.55	10.45
chr1.capped.23	AT1G01160	2.49	2.5	1.91	1.71	0.94	0.75	2.14	1.8	2.62	0.99	0.56	0.07	0.39	1.33	0.7	7.26	4.02	5.24
chr1.capped.230	AT1G03000	4.24	2.98	1.78	4.03	5.17	2.29	5.27	2.91	3.34	1.54	1.48	0.66	3.24	2.83	5.87	5.16	3.36	5.09
chr1.capped.2300	AT1G20870	1.61	0.84	1	0.4	0.27	0.16	0.5	0.77	0.81	0.44	1.09	0.74	0.78	0.99	0.28	3.63	1.2	0.84
chr1.capped.2301	AT1G20880	3.22	2.8	2.47	7.97	8.05	6.85	8.27	3.9	3.75	4.34	3.46	2.49	5.42	5.92	6.36	6.77	3.33	8.44
chr1.capped.2302	AT1G20890	10.71	8.33	8.45	7.17	9.03	6.13	13.53	10.73	9.93	11.27	11.31	8.68	10.07	15.07	18.99	10.51	8.73	14.39
chr1.capped.2303	AT1G20910	3.75	3.64	1.71	2.01	1.83	2.15	2.47	2.69	1.12	0.33	0.77	1.1	2.07	3.46	2.26	9.5	3.86	5.6
chr1.capped.2304	AT1G20920	37.24	39.59	36.15	34.85	34.74	26.5	41	36.95	35.63	33.56	27.96	29.29	39.39	37.33	44.19	65.67	59.43	65.04
chr1.capped.2307	AT1G20925	1.98	0.54	0.93	0	0	0	0.41	0	0	2.75	4.15	4.84	0	0	0	0	0	0
chr1.capped.2308	AT1G20930	4.99	5.03	2.6	0.42	0.82	0.53	0.84	0.8	1	2.86	2.47	2.84	1.29	1.65	1.41	14.97	9.84	9
chr1.capped.2309	AT1G20950	0.54	0	0.35	0	0	0.02	0.11	0.12	0.19	0	0.09	0.07	1.05	0.62	1.93	0.1	0	0
chr1.capped.231	AT1G03020	0.09	0.27	0.23	0.2	0.13	0	0.08	0.1	0.08	0.55	0.49	0.37	0	0.11	0	0.04	0	0.24
chr1.capped.2310	AT1G20950	5.98	6.07	4.57	0.3	0.94	0.62	2.48	3.41	6.22	1.75	1.66	2.86	8.84	9.82	10.48	10.57	2.41	3.7
chr1.capped.2312	AT1G20960	10.33	10.32	6.46	4.43	6.56	4.32	10.02	8.12	8.4	4.5	4.79	3.88	9.64	9.39	9.65	22.63	5.22	11.66
chr1.capped.2313	AT1G20970	9.61	10.63	9.54	11.4	17.99	11.68	12.85	7.54	9.16	8.56	7.17	8.66	10.44	9.66	26.5	11.66	3.62	8.08
chr1.capped.2316	AT1G20970	1.87	1.95	2.43	1.21	1.53	0.69	0.16	0	0.33	0.22	0	0	1.03	0.89	0.86	1.28	1.21	3.09
chr1.capped.2317	AT1G20980	31.88	29.12	30.98	27.25	26.44	22.88	31.63	36.06	35.68	20.35	14.58	16.34	39.64	37.68	59.72	21.06	18.08	34.7
chr1.capped.2319	AT1G21000	11.76	9.24	11.17	56.16	62.29	55.27	43.49	29.67	12.52	21.89	20.55	19.87	6.98	4.22	3.82	13.02	5.2	14.63
chr1.capped.232	AT1G03030	7.94	5.8	6.49	7.04	6.95	5.59	6.88	5.4	6.97	7.23	5.22	4.92	11.12	9.99	11.6	10.46	4.25	9.79
chr1.capped.2320	.	1.69	2.28	4.19	0	0	0.02	0.08	0.1	0	6	11.9	7.61	0	0	0.14	0.26	0	0
chr1.capped.2321	.	0.36	0.41	0.61	0	0	0.02	0	0.1	0	1.97	5.22	4.07	0	0	0	0.02	0	0
chr1.capped.2322	AT1G21010	38.25	35.57	44.3	4.76	6.94	9.68	3.24	5.91	3.52	82.76	56.94	49.51	33.43	48.76	61.7	4.63	1.34	2.26
chr1.capped.2323	AT1G21050	2.31	2.41	0.77	0.5	0.6	0.73	0.5	0.4	0.58	1.09	0.49	0.59	2.83	1.23	1.28	8.75	3.08	2.98
chr1.capped.2324	AT1G21060	2.87	2.81	3.42	7.84	7.06	3.22	9.91	8.1	8.73	0.99	0.98	0.79	1.43	3.21	1.83	1.07	1.05	2.52
chr1.capped.2325	AT1G21065	31.56	34.17	37.39	150.46	170.18	87.12	22.04	18.52	18.66	15.35	14.23	13.6	19.47	24.67	27.74	33.87	20.21	35.39
chr1.capped.2326	AT1G21070	0.81	0.27	0.61	0.1	0.21	0.09	0.32	0.1	0.97	0.55	0.21	0.44	0	0	0	0.12	0.13	0.12
chr1.capped.2327	AT1G21070	15.52	11.48	9.42	3.62	3.62	1.24	9.04	8.92	11.26	16.75	23.53	26.16	3.76	4.88	4.4	5.98	2.13	4.43
chr1.capped.2328	AT1G21080	23.97	20.94	20.67	18.03	18.58	13.14	26.75	19.34	22.12	15.76	17.1	17.09	32.85	38.19	72.05	30.71	13.08	19.83
chr1.capped.233	AT1G03040	11.32	10.14	9.07	13.1	17.57	12.9	8.07	6.11	6.95	5.8	5.13	5.21	10.58	11.37	15.01	39.18	13.94	23.68
chr1.capped.2330	AT1G21090	3.05	4.18	2.4	0.7	0.75	0.28	2.51	3.7	2.58	0.44	0.49	0.63	1.17	1.78	0.28	8.9	3.19	6.2
chr1.capped.2331	AT1G21090	2.24	2.61	1.62	0.5	0.73	0.34	0.98	1.2	1.21	0.11	0.07	0.22	1.55	0.78	1.14	5.47	2.41	2.15
chr1.capped.2332	AT1G21140	18	17.5	15.15	0.51	1.22	1.34	0.24	2.81	0.08	30.39	21.93	23.96	0	0.11	0	0.06	0	0
chr1.capped.2333	AT1G21140	0.27	0	0.16	0	0	0.05	0	0	0	0.44	0.21	0.07	0	0	0	0.02	0.13	0
chr1.capped.2334	AT1G21150	1.53	1.48	1.55	0.6	0.77	0.39	1.55	0.8	0.32	0.88	0.63	1.09	2.08	1.77	1.84	3.24	1.19	3.24
chr1.capped.2336	AT1G21170	3.4	3.49	4.69	2.5	1.55	1.42	4.24	2.8	2.92	4.83	5.69	6.81	2.6	2.56	4.66	3.34	1.05	3.2
chr1.capped.2337	AT1G21160	6.53	4.79	5.27	7.07	6.69	3.99	8.44	6.12	5.64	7.54	6.9	4.41	5.69	7.14	7.79	6.17	6.26	6.8
chr1.capped.2338	AT1G21160	0.89	1.11	1.09	1.51	2.15	0.82	0.81	1	0.8	0.88	0.91	0.63	0.52	1.22	0.84	3.42	1.98	2.78
chr1.capped.2339	AT1G21190	24.17	19.95	22.29	20.69	19.88	13.15	26.08	19.74	17.29	11.38	11.71	9.23	24.6	27.38	33.61	38.14	23.7	31.19
chr1.capped.234	AT1G03050	87	84.36	88.3	0.1	0.07	0.78	1.22	22.26	1.94	369.26	262.25	238	0	0.22	22.82	2.08	0.62	0
chr1.capped.2340	AT1G21200	3.94	1.82	3.68	4.03	3.85	2.44	4.39	3.2	5.21	2.2	1.75	1.01	4.78	5.48	6.26	8.45	2.75	4.51
chr1.capped.2341	AT1G21200	0.89	2.15	1.59	0	0	0	0.08	0.2	0.08	4.26	4.17	4.59	0	0	0.43	0.02	0	0
chr1.capped.2342	AT1G21250	0.45	0.41	0.7	2.02	1.21	1.52	0	0.2	0.16	0	0	0.15	2.2	1	0.99	0.64	1.12	0.72
chr1.capped.2344	.	1.43	2.02	1.7	2.82	2.88	1.24	1.23	1	1.29	1.47	1.05	0.94	2.59	2.11	1.41	5.72	2.05	2.86
chr1.capped.2345	AT1G21270	1.09	0.68	0.75	0.9	0.94	0.4	1.16	0.3	0.66	0.66	0	0.42	0	0.11	0.42	0.02	0.13	0
chr1.capped.2346	AT1G21280	5.88	4.92	3.46	2.82	4.63	1.79	3.06	2.8	3.08	4.27	4.86	3.71	4.26	5.58	6.37	13.74	4.68	5.37
chr1.capped.2347	AT1G21310	3.28	2.49	2.06	15.77	16.82	16.83	1.08	0.8	0.57	6.01	2.76	1.7	13.5	7.49	6.95	4.47	2.95	18.17
chr1.capped.2348	.	0	0	0.23	0	0	0	0	0.2	0	0	0	0	0	0	0	0.1	0.13	0
chr1.capped.2349	AT1G21350	5.98	6.68	5.57	11.3	12.43	5.88	7.22	6.62	7.57	1.43	1.55	1.55	6.45	6.35	6.35	9.29	5.34	8.42
chr1.capped.235	AT1G03055	0.27	0.68	0.71	1.2	1.42	0.43	0.24	0.6	0.08	0.11	0	0.14	0.13	0.22	0.14	0.04	0.39	0.72
chr1.capped.2350	AT1G21370	9.01	5.41	7.03	5.84	5.85	4.24	7.68	6.31	6.51	7.55	7.18	5.67	12.12	10.15	21.52	4.73	3.59	4.43
chr1.capped.2351	AT1G21380	1.35	1.47	1.92	1.81	1.94	1.64	0.4	0.3	0.41	0.77	0.42	0.22	0.26	0.9	0.71	0.98	0.13	0.24
chr1.capped.2352	AT1G21380	7.76	5.99	5.74	6.55	7.1	4.27	4.57	3.5	4.14	5.6	2.74	3.9	8.12	9.5	13.74	9.28	3.6	5.5
chr1.capped.2353	AT1G21390	0.09	0.14	0.23	0.1	0.13	0.14	0	0	0	0	0.14	0	0.13	0.11	0.28	0.33	1.2	0.36
chr1.capped.2354	AT1G21390	2.16	1.3	1.78	2	1.04	1.09	0.32	0.9	0.8	1.1	0.7	0.71	1.3	3.11	2.82	3.61	2.08	2.4
chr1.capped.2355	AT1G21400	14.45	13.69	20.76	26.78	30.61	32.25	200.83	131.78	87.11	5.93	18.9	6.58	113.45	161.49	158.96	21.36	8.47	19.5
chr1.capped.2356	AT1G21410	4.84	3.18	3.26	12.31	15.01	13.44	4.45	2.6	2.03	5.6	3.3	3.52	5.43	5.56	5.93	7.88	6.12	11.56
chr1.capped.2357	AT1G21440	15.87	15.34	14.09	4.06	4.3	2.25	13.59	15.06	17.88	3.51	3.45	3.77	15.93	19.44	14.58	29.8	12.45	19.65
chr1.capped.2358	AT1G21450	3.15	3.5	2.39	5.73	6.88	5.41	2.4	2.2	1.95	1.87	1.33	1.53	2.33	1.54	0.84	6.25	2.38	6.58
chr1.capped.2360	AT1G21460	32.48	36.99	43.42	401.18	516.14	376.47	62.92	38.98	60.93	42.68	25.27	24.12	38.69	18.88	22.27	11.6	13.54	28.14
chr1.capped.2361	AT1G21470	0.27	0.25	0.46	3.43	3.81	3.22	0.08	0	0	0	0	0	0	0	0	0	0	0.24
chr1.capped.2363	AT1G21480	12.57	9.04	10.65	35.95	26.55	18.5	17.64	12.84	16.7	10.76	8.42	7.45	11.09	13.18	15.72	11.98	6.68	13.46
chr1.capped.2364	AT1G21500	53.38	47.21	52.7	169.18	171.21	68.41	56.65	28.84	45.12	18.8	14.93	10.78	42.69	44.15	39.43	43.76	33.45	44.91
chr1.capped.2365	AT1G21510	0.27	0.14	0.08	0	0.07	0.05	0.08	0.1	0	0	0.07	0	0	0.06	0.14	0.35	0.26	0.12
chr1.capped.2366	AT1G21540	3.85	3.81	6.84	2.51	4.24	2.77	5.78	9.23	5.87	3.84	2.96	4.11	118.92	176.06	216.86	0.35	1.85	2.4
chr1.capped.2367	AT1G21550	2.59	2.44	3.69	4.23	5.59	3.42	1.15	1.4	1.14	0.33	1.69	0	89.96	161.06	273.48	0.25	0.46	0.12
chr1.capped.2368	AT1G21560	4.58	5.42	5.36	3.31	2.9	1.57	6.27	7.71	6.45	2.09	1.76	1.31	9.68	8.91	11.02	10.26	5.04	7.28
chr1.capped.237	AT1G03060	0.18	0	0.08	0.1	0.07	0.11	0.08	0.1	0	0	0	0	0	0	0	0.08	0.13	0.12
chr1.capped.2370	AT1G21580	3.38	3.25	1.31	2.61	2.35	2.59	3.54	2.8	3.19	2.2	2.38	1.21	2.46	2.79	2.54	3.11	2.13	3.23
chr1.capped.2373	AT1G21590	3.88	3.58	3.69	5.13	5.28	3.28	9	5.82	8.75	2.33	2.53	1.07	11.1	6.12	1.41	9.24	2.53	6.09
chr1.capped.2374	AT1G21610	4.9	3.78	3.83	7.05	6.38	4.8	7.11	5.91	5.47	2.85	3.44	2.93	3.86	4.46	4.1	10.17	4.39	8.46
chr1.capped.2375	AT1G21600	11.07	11.09	10.61	17.89	16.56	10.96	18.33	12.94	14.37	4.83	5.92	4.5	11.48	11.5	8.07	22.63	10.47	18.79
chr1.capped.2376	AT1G21630	12.85	14.53	12.53	11.07	11.09	10.53	24.17	15.03	18.52	14.67	14.18	10.59	13.66	10.59	15.54	16.31	10.14	12.98
chr1.capped.2377	AT1G21640	3.67	4.98	3.79	7.46	10.33	6.47	5.79	4.6	4.32	3.95	5.05	3.87	5.15	5.21	11.06	4.99	1.85	4.78
chr1.capped.2378	AT1G21650	1.07	0.94	0.91	1.52	0.61	0.73	1.58	1.5	1.38	0.66	0.28	0.44	2.06	1.78	2.69	2.11	1.47	2.15
chr1.capped.2379	AT1G21650	1.08	1.28	0.86	0.8	1.14	0.69	1.64	1.3	0.49	1.43	0.56	0.65	1.17	0.66	0.56	2.26	0.79	2.27
chr1.capped.238	AT1G03060	4.42	4.01	3.91	3.2	3.07	5.18	3.25	5.8	3.8	4.73	3.92	2.56	4.29	2.2	4.79	0.99	4.96	10.16
chr1.capped.2380	AT1G21660	10.2	9.06	10.99	4.72	6.38	4.5	6.38	7.11	8.59	16.65	14.87	11.57	6.84	6.62	9.42	10.71	4.04	7.54
chr1.capped.2381	AT1G21670	8.1	7.46	4.27	8.49	9.61	11.29	10.19	9.23	7.8	5.14	4.15	9.91	2.96	3.31	9.65	2.03	0.4	0.95
chr1.capped.2382	AT1G21680	6.95	7.54	6.86	55.5	56.93	49.46	47.93	15.66	14.91	3.72	7.99	3.02	32.94	36.67	26.94	22.67	14.76	36.96
chr1.capped.2383	AT1G21690	11.69	8.15	6.04	6.75	6.22	3.98	6.64	7.22	6.48	2.63	2.04	3.51	9.8	11.96	11.61	26.64	8.42	13.45
chr1.capped.2384	AT1G21695	0.81	0.48	0.31	0.2	0.68	0.39	0.68	0.2	0.32	0.55	0.14	1.16	0.39	1.01	0.56	0.46	1.46	0.72
chr1.capped.2385	AT1G21695	0.09	0.2	0.46	0.2	0.41	0.77	0.08	0.3	0.49	0.55	0.14	0.22	0.13	0.22	1.12	0.26	0.39	0.48
chr1.capped.2386	AT1G21700	8.63	8.87	8.77	8.67	7.43	5.63	9.04	6.41	8.7	7.01	6.08	5.69	9.01	7.91	16.86	10.31	7.63	13.58
chr1.capped.2388	AT1G21720	34.83	33.85	34.07	25.06	30.6	24.44	50.42	36.65	45.46	26	24.54	19.93	37.43	39.45	46.2	56.05	28.31	34.12
chr1.capped.2389	AT1G21730	1.37	1.38	1.22	2.02	2.96	0.95	3.13	2.12	1.54	0.77	0.7	0.73	1.42	0.59	0.57	5.47	1.99	1.94
chr1.capped.239	AT1G03070	12.4	10.52	15.31	0.51	0.67	0.57	2.07	2.61	1.87	51.36	48.25	39.79	0.52	0.11	2.13	2.04	0.66	0.6
chr1.capped.2390	AT1G21730	0.27	0.63	0.55	0.1	0.28	0.35	0.4	0.9	0.4	0.11	0.07	0.07	0.13	0.33	0.14	0.47	0.91	0.48
chr1.capped.2391	AT1G21740	1.35	1.56	1.5	0.2	0.21	0.08	1.48	0.9	1.21	0.33	0.35	0.43	7.88	5.27	9.55	1.53	1.19	0.84
chr1.capped.2392	AT1G21750	57.48	47.22	42.64	28.2	31.31	19.88	34.13	22.78	46.82	51.76	45.01	43.45	288.38	270.76	559.35	70.33	18.4	23.89
chr1.capped.2393	AT1G21760	7.87	5.46	5.29	12.75	10.82	8.74	11.24	6.1	8.44	9.11	10.66	8.57	6.73	8.38	10.08	8.6	3.83	10.63
chr1.capped.2394	AT1G21780	1.08	0.74	1.3	2.22	2.55	1.44	1.74	1	0.98	0.11	0.14	0.22	0.78	1.43	2.27	0.76	0.79	1.19
chr1.capped.2395	AT1G21770	27.78	25.69	33.4	48.74	67.22	38.73	61.63	42.59	42.6	16.28	17.58	13.52	90.8	116.05	152.56	46.08	22.84	45.03
chr1.capped.2396	AT1G21780	5.07	4.7	5.11	9.38	8.49	9.91	9.63	8.61	6.72	5.26	5.37	4.83	7.06	7.8	6.38	11.31	4.94	12.15
chr1.capped.2397	AT1G21790	13.26	10.47	12.91	10.91	9.67	14.2	45.76	15.78	76.43	32.01	19.6	10.86	25.71	23.47	210.03	15.43	10.87	17.71
chr1.capped.2398	AT1G21810	0.03	0.07	0	0	0.07	0.02	0.19	0.1	0.41	0	0	0	0.39	0	0	0.04	0	0
chr1.capped.2399	AT1G21810	0.72	0.75	0.39	0	0.28	0.06	0.08	0.1	0.57	0.11	0.07	0.36	0.19	0.11	0.14	2.05	0.79	1.43
chr1.capped.24	AT1G01170	0.45	0.14	0.31	1.91	1.48	1.29	0.08	0.1	0.16	0	0	0	0	0.22	0	0.15	0.27	0.36
chr1.capped.240	AT1G03080	13.38	13.38	15.38	12.94	12.53	12.24	21.66	21.14	16.58	4.46	6.27	5.99	15	13.47	16.33	9.91	9.02	15.55
chr1.capped.2400	AT1G21830	16.74	16.69	18.21	10.6	12.04	13.04	60.87	29.74	28.91	20	13.97	5.84	15.7	12.54	11.2	32.86	10.33	14.74
chr1.capped.2401	AT1G21840	1.7	2.82	2.39	1.61	1.41	0.94	3.64	2.6	2.1	2.42	3.88	2.2	1.3	1.22	1.13	4.1	1.99	2.87
chr1.capped.2402	AT1G21880	13.64	13.42	11.93	4.53	4.6	3.21	6.48	7.92	10.71	3.74	3.5	4.19	8.38	6.15	6.66	29.88	16.01	16.01
chr1.capped.2403	AT1G21900	15.65	11.62	15.49	16.32	16.09	12.66	11.1	10.21	14.21	10.37	9.93	8.21	74.5	67	134.39	27.72	10.65	14.88
chr1.capped.2404	AT1G21910	19.31	19.93	20.33	3.23	3.42	2.75	1.66	1.51	6.83	3.82	1.35	5.1	0.13	0.34	1.28	3.33	2.69	2.02
chr1.capped.2406	AT1G21920	0.18	0	0.16	0.6	0.34	0.3	0.16	0	0.08	0.33	0.14	0.07	0	0.33	0.56	0.42	0	0.24
chr1.capped.2407	AT1G21920	4.03	3.77	2.81	8.87	14.44	14.91	8.39	7.76	5.09	5.67	4.3	4.88	3.95	4.15	5.38	5.54	1.61	3.04
chr1.capped.2408	AT1G21930	20.85	18.4	18.55	25.24	24.25	16.58	25.65	21.58	20.42	11.14	13.52	7.82	25.85	35.09	38.98	41.26	29.41	40.64
chr1.capped.2409	AT1G21980	16.3	10.49	14.38	10.31	12.9	10.15	6.21	6.32	6.48	7.11	6.29	5.45	10.18	9.37	14.73	7.52	4.55	8.68
chr1.capped.241	AT1G03090	38.69	27.36	47.97	56.72	45.2	70.6	540.12	321.63	177.22	31.78	71.24	12.11	153.26	240.33	173.3	89.07	75	232
chr1.capped.2410	AT1G22010	0	0.07	1.21	0	0	0	0	0.1	0	1.09	0.14	0.07	0	0	0	0	0	0
chr1.capped.2411	AT1G22015	1.36	1.02	2.18	0.3	0.28	0.42	0.64	1	0.65	0.55	0.22	0.42	0.13	0	0.42	2.2	2.65	0.96
chr1.capped.2412	AT1G22020	5.26	3.92	3.36	5.55	5.24	3.16	4.87	2.91	2.95	5.7	4.15	3.75	2.47	3.9	5.79	5.17	1.73	3.11
chr1.capped.2415	AT1G22030	1.61	2	1.39	0.3	0.41	0.52	0.4	1.3	0.4	1.87	0.65	1.02	0.39	0.44	0.7	1.33	0.55	0.72
chr1.capped.2416	AT1G22030	0.09	0	0.16	0	0.21	0.02	0.08	0.3	0.08	0.11	0.14	0.28	0	0	0	0.36	0.39	0
chr1.capped.2417	AT1G22030	0.18	0.08	0.24	0.1	0	0.13	0.16	0.1	0.16	0	0.07	0.21	0.13	0.33	0.28	0.4	0.26	0.36
chr1.capped.2418	.	1.08	1.42	1.16	0	0.07	0.09	0.32	0.6	0.48	0.99	0.84	0.64	0.39	0.11	0.14	0.85	0.65	0.36
chr1.capped.2419	.	0.27	0.13	0.16	0	0	0.02	0.16	0.2	0.08	0.77	0.14	0.29	0.13	0	0	0.06	0	0.12
chr1.capped.242	AT1G03110	5.18	6.83	6.5	2.41	2.9	1.07	3.15	3.31	3.19	3.62	3.45	3.46	4.04	4.35	7.11	13.71	4.3	7.25
chr1.capped.2420	AT1G22040	5.37	2.97	3.64	5.64	6.22	4.37	5.94	3.1	3.67	3.07	2.45	1.59	4.54	5.82	3.54	5.86	3.17	6.22
chr1.capped.2421	AT1G22050	4.07	3.12	3.49	10.17	9.01	5.9	2.18	2.14	2.81	1.75	1.78	1.3	1.24	0.6	1.26	2.02	1.75	3.19
chr1.capped.2424	AT1G22060	2.76	2.79	3.61	1.3	1.38	0.92	8.77	6.02	5.76	0.99	0.77	0.79	1.97	3.4	4.09	2.97	0.79	2.52
chr1.capped.2425	AT1G22065	1.96	0.95	2.29	0.61	1.2	0.5	0.5	0.2	0.16	5.35	0.35	1.7	0	0	0	0.11	0.4	0.12
chr1.capped.2426	AT1G22070	7.62	9.41	10.22	19.09	20.38	6.85	8.65	5.96	10	4.41	3.02	3.06	7.67	5.53	7.91	6.14	3.31	7.7
chr1.capped.2427	AT1G22090	0.18	0.07	0.16	0	0.07	0.02	0	0	0	0.22	0	0	0	0	0	0.15	0.13	0.12
chr1.capped.2428	AT1G22100	2.5	0.48	0.39	0	0	0	0.4	0	0	2.42	1.54	2.19	0	0	0	0.08	0	0.48
chr1.capped.2429	AT1G22110	20.32	17.92	24.27	0	0	0.19	1.64	1.5	0.32	66.07	74.43	40.39	0	0	1.84	3.27	0.13	0
chr1.capped.243	AT1G03120	4.72	2.96	4.35	0.58	0.34	0.32	1.99	1.4	1.21	9.17	18.39	15.99	0.39	0.67	0.42	1.44	0.26	0.6
chr1.capped.2430	AT1G22130	11.85	6.87	9.68	0	0	0.09	0.9	1.1	0	29.72	35.51	27.29	0	0.22	0.14	2.25	0	0
chr1.capped.2431	AT1G22140	38.74	32.44	42.86	45.68	51.6	31.12	23.83	25.99	30.12	38.15	41.79	31.62	33.6	31.2	51.48	22.42	21.06	26.07
chr1.capped.2432	.	5.19	2.7	2.09	0	0	0	0.66	0.1	0	4.82	11.25	15.09	0	0	0	0	0	0
chr1.capped.2433	AT1G22160	13.82	14.38	11.09	8.88	8.83	7.67	7.86	9.62	11.08	2.3	2.6	1.69	14.42	11.51	8.5	38	17.02	30.9
chr1.capped.2434	AT1G22170	6.71	6.36	7.66	1.3	1.75	0.94	13.43	11.93	18.19	3.4	2.81	2.39	21.26	19.37	44.82	3.83	1.05	2.04
chr1.capped.2435	AT1G22170	0.81	0.34	1.15	0.1	0.2	0.02	1.28	1.3	1.22	0.77	1.54	1.39	2.2	1.34	2.05	0.2	0.13	0.24
chr1.capped.2436	AT1G22180	2.87	2.7	4.02	3.82	4.24	3.18	2.8	2.6	2.68	2.75	1.61	2.19	1.93	1.89	6.92	0.65	0.26	0.6
chr1.capped.2437	AT1G22190	5.69	5.11	5.7	11.73	10.41	12.84	2.48	2.51	1.97	1.75	0.63	1.04	1.16	1.23	6.52	0.14	1.21	2.26
chr1.capped.2438	AT1G22190	0.98	0.74	0.9	0.53	0.07	0.23	1.73	2.06	0.85	0.99	0.07	0.14	0.52	0.72	0.43	1.41	1.34	2.15
chr1.capped.2439	AT1G22200	34.21	42.96	42.76	7.85	9.68	5.95	10.19	14.82	10.76	121.76	93.64	56.19	9.05	10.57	17.83	32.1	7.84	12.05
chr1.capped.244	AT1G03130	65.51	68.13	73.17	403.11	472.73	201.28	135.7	60.06	101.41	31.57	25.05	15.88	56.57	34.32	31.04	50.76	27.13	41.25
chr1.capped.2440	AT1G22250	13.7	12.63	12.01	0.3	0.34	0.48	7.15	11.34	22.17	2.85	2.26	3.11	43.47	40.93	67.79	11.85	6.18	3.81
chr1.capped.2441	AT1G22260	0.63	0.54	0.39	0	0.2	0.07	0.34	0.3	0.8	0.44	0.7	0.88	0.52	0.22	0.28	0.42	0	0.36
chr1.capped.2442	AT1G22270	48.59	42.87	41.79	29.72	34.91	20.81	41.93	29.76	37.12	21.51	18.83	20.66	36.53	37.48	38.48	68.64	51.64	73.02
chr1.capped.2443	AT1G22275	1.16	0.27	0.24	0.1	0.2	0.16	0.08	0.1	0.33	0.33	0.07	0.42	0	0.45	0.28	1.15	0.53	0.6
chr1.capped.2444	AT1G22280	27.4	18.98	23.07	20.11	18.97	17.93	22.15	14.04	13.96	12.12	12.14	9.76	32.33	37.39	108.69	16.2	16.07	17.86
chr1.capped.2445	AT1G22300	146.36	121.42	141.4	76.52	63.08	52.57	111.34	112.96	128.05	133.34	122.85	103.1	125.5	118.27	219.09	110.66	75.94	89.47
chr1.capped.2446	AT1G22310	3.65	2.51	2.83	2.92	3.28	2.08	4.22	4.4	3.75	1.76	1.95	2.05	3.36	2.68	6.12	5.32	3.2	4.65
chr1.capped.2447	AT1G22330	12.91	13.34	12.67	2.51	2.08	0.89	11.54	12.94	15.42	10.72	5.51	7.8	1.04	1.56	1.12	3.5	8.28	5.48
chr1.capped.2448	AT1G22330	0.36	0.47	0.31	0.4	0.26	0.02	0.32	0.5	0.48	0.33	0.07	0.07	0	0	0	0.42	0.8	0
chr1.capped.2449	AT1G22330	16.75	17.88	17.71	1	1.08	0.51	7.55	15.35	18.33	10.06	3.6	11.04	0.77	0.66	1.55	1.34	3.19	1.2
chr1.capped.245	AT1G03150	16.4	11.92	13.52	14.72	14.51	10.87	11.27	12.83	11.44	15.53	17.8	15.96	14.77	15.72	20.94	19.98	13.23	14.3
chr1.capped.2451	AT1G22360	5.18	4.24	7.64	28.71	28.94	22.65	2.98	0.8	2.37	1.32	0.56	1.24	2.2	0.78	1.7	0.74	1.06	2.03
chr1.capped.2452	AT1G22370	1.25	1.15	2.48	13.31	17.08	6.27	2.46	1.3	2.28	0.33	0.84	0.22	0.13	0.89	0.57	2.16	1.86	1.32
chr1.capped.2456	AT1G22380	13	10.97	14.78	18.08	23.82	9.57	13.79	20.48	20.91	14.98	12.51	9.25	3.73	4.57	12.89	0.28	0	0.6
chr1.capped.2459	AT1G22400	6.83	6.61	8.14	8.13	10.96	4.64	7.39	9.4	8.2	2.36	3.78	1.27	2.58	2.86	2.38	0.22	0.39	0
chr1.capped.246	AT1G03140	14.52	9.21	9.81	13.42	13.76	11.57	19.78	12.94	12.14	9.42	8.63	8.26	14.8	18.21	15.73	29.23	18.39	27.92
chr1.capped.2460	AT1G22400	57.39	45.23	65	95.85	98.64	103.45	135.48	126.59	110.48	38.76	63.8	21.28	24.96	32.77	54.73	3.47	2.54	3.93
chr1.capped.2461	AT1G22403	4.12	3.41	5.2	3.32	3.47	4.06	7.68	6.41	4.39	6.9	7.74	5.23	5.7	6.79	8.89	5.11	3.17	4.55
chr1.capped.2462	AT1G22410	44.7	37.59	41.45	13.83	13.96	10.57	39.94	62.66	82.57	51.77	25.82	33.26	39.37	44.26	112.86	8.37	6.43	9.41
chr1.capped.2463	AT1G22430	3.34	2.64	3.07	3.02	3.75	1.49	1.64	1.62	1.29	0.55	0	0.51	3.01	2.86	0.98	3.48	2.82	4.43
chr1.capped.2464	AT1G22450	73.18	61.9	69.82	47.89	50.29	34.38	75.53	66.39	78.16	54.74	41.46	41.42	105.47	108.35	149.61	93.23	49.77	77.5
chr1.capped.2465	AT1G22460	10.57	8.9	8.43	0.3	0.54	0.44	1.3	2.11	2.17	20	28.11	24.7	0	0	0.7	3.84	1.19	1.2
[truncated: 26,796 more rows]

## Sheet: Dilution 5ng
Supplemental Data S2: 5' end features identified by EndGraph in floral bud RNA from Arabidopsis thaliana
[truncated: 22,854 more rows]

[truncated: 3 more sheets: Dilution 1ng, Dilution 100pg, Dilution 10pg]
