# Supplementary material for: NanoPARE: parallel analysis of RNA 5′ ends from low-input RNA
Source: Genome Res. 2018 Dec;28(12):1931–42. doi: 10.1101/gr.239202.118 (PMC6280765; doi:10.1101/gr.239202.118)
Supplement: Supplemental Material [file supp_gr.239202.118_Supplemental_Data_S3.xlsx]

## Sheet: noncoding RNA features
Supplemental Data S3. EndGraph features associated with noncoding RNA
All features that contain a TSS or mature 5' end for a primary snoRNA, snRNA, microRNA, or tRNA annotated in Araport11
								Peak nucleotide RPM
Chromosome	Position	Strand	Feature name	5' end type	AGI	Transcript type	Notes	Col-0 Xrn1- 1	Col-0 Xrn1- 2	Col-0 Xrn1- 3	Col-0 Xrn1+ 1	Col-0 Xrn1+ 2	Col-0 Xrn1+ 3	xrn4-5 1	xrn4-5 2	xrn4-5 3
Chr1	23134	+	Chr1.capped.6	miRNA_TSS	AT1G01046	intron	host=AT1G01040	1.32	1.17	1.74	0.4	1.34	3.16	0.76	0.93	1.09
Chr1	78930	-	Chr1.noncapped.28	miRNA_3p3P	AT1G01183	unit	name=ath-miR165a	0.59	0.31	1.08	0	0	0	0.15	1.15	0.31
Chr1	79160	-	Chr1.capped.29	miRNA_TSS	AT1G01183	unit	name=ath-miR165a	0.03	0.14	0	0.57	0	0	0.03	0.22	0
Chr1	237739	-	Chr1.capped.77	miRNA_TSS	AT1G04027	intron	host=AT1G01650	2.06	1.39	0.61	2.8	0.76	1.45	6.47	4.09	4.52
Chr1	306379	+	Chr1.capped.101	tRNA_TSS	AT1G01870	unit	tRNA=val_TAC	0.23	0	0	0.66	0.43	0	0	0	0
Chr1	306383	+	Chr1.capped.101	tRNA_5P	AT1G01870	unit	tRNA=val_TAC	0.69	0	0	0.91	1.03	0.76	0.08	0	0.07
Chr1	309687	-	Chr1.capped.104	tRNA_TSS	AT1G01890	unit	tRNA=lys_CTT	0.36	0.36	0.2	0.05	0.1	0	0.15	0.15	0
Chr1	875189	-	Chr1.noncapped.287	snoRNA_5P	AT1G04187	tandem	cluster=5;position=5		0.68	0.83	1.26	0	0	0	1.14	1.19
Chr1	875604	-	Chr1.noncapped.288	snoRNA_5P	AT1G03506	tandem	cluster=5;position=2	6.35	6.79	1.33	1.02	0	0.32	0	1.81	1.26
Chr1	875897	-	Chr1.capped.289	snoRNA_TSS	AT1G04197|AT1G03506|AT1G03502|AT1G04193|AT1G04187	tandem	cluster=5	0.31	0.31	1.22	1.81	0.75	1.68	0.98	3.22	4.42
Chr1	937286	-	Chr1.noncapped.321	snoRNA_5P	AT1G03743	tandem	cluster=3;position=2	75.89	84.17	36.58	16.18	0.29	0.85	0.41	45.11	22.2
Chr1	937484	-	Chr1.noncapped.322	snoRNA_5P	AT1G03746	tandem	cluster=3;position=1	36.93	43.04	32.81	9.19	0.24	1.12	0.71	31.4	21.35
Chr1	937580	-	Chr1.noncapped.322	snoRNA_TSS	AT1G03746|AT1G03743|AT1G04213	tandem	cluster=3	1.77	1.77	2.54	1.14	1.29	1.3	1.47	1.41	1.17
Chr1	1008508	+	Chr1.capped.346	snoRNA_TSS	AT1G04217|AT1G03935|AT1G04223|AT1G04227	tandem	cluster=4	4.61	2.65	3.44	1.62	3.26	4.6	3.73	7.84	6.86
Chr1	1008808	+	Chr1.noncapped.347	snoRNA_5P	AT1G03935	tandem	cluster=4;position=2	9.57	2.56	1.55	1.25	0.24	0	1.58	1.28	0.71
Chr1	1009071	+	Chr1.noncapped.348	snoRNA_5P	AT1G04223	tandem	cluster=4;position=3	1.6	1.05	2.1	0	0	0.07	1.56	2.46	0.58
Chr1	1009222	+	Chr1.noncapped.349	snoRNA_5P	AT1G04227	tandem	cluster=4;position=4	2.11	0.69	1.49	0	0	0	0.39	0.67	0.7
Chr1	1215831	-	Chr1.capped.418	snRNA_5P	AT1G04263	unit	snRNA=U5	1.42	0.53	1.37	0.88	3.42	1.05	0.83	0.96	0.14
Chr1	1216097	+	Chr1.capped.419	snoRNA_TSS	AT1G04267|AT1G04273|AT1G04277	intron	host=AT1G04480;cluster=3	54.94	38.06	45.61	158.2	47.07	55.32	56.55	43.08	87.42
Chr1	1216919	+	Chr1.noncapped.420	snoRNA_5P	AT1G04277	intron	host=AT1G04480;cluster=3;position=3	2.86	1.79	1.39	0	0	0	2.19	0.91	0.78
Chr1	1659440	-	Chr1.capped.561	miRNA_TSS	AT1G04393	intron	host=AT1G05570	0.87	1.53	0.93	0.92	0.62	0.62	2.25	2	1.09
Chr1	1978083	+	Chr1.noncapped.661	tRNA_5P	AT1G06480	unit	tRNA=ile_AAT	2.56	1.43	0.46	0	1.21	1.98	0	0.04	0
Chr1	2107396	-	Chr1.noncapped.707	snoRNA_5P	AT1G04517	tRNA_snoRNA	host=AT1G06860;tRNA=gly_GCC	0.73	0.48	0.13	0.63	3	0.43	1.76	1.32	0
Chr1	2107396	-	Chr1.noncapped.707	tRNA_3P	AT1G06860	tRNA_snoRNA	host=AT1G04517;tRNA=gly_GCC	0.73	0.48	0.13	0.63	3	0.43	1.76	1.32	0
Chr1	2107467	-	Chr1.noncapped.707	tRNA_5P	AT1G06860	tRNA_snoRNA	host=AT1G04517;tRNA=gly_GCC	0	0.16	0	0	0	0.39	0	0	0
Chr1	2111146	-	Chr1.noncapped.709	snoRNA_5P	AT1G04527	tRNA_snoRNA	host=AT1G06880;tRNA=gly_GCC	2.47	0.65	0.95	1.05	0.85	0.46	2.58	1.33	0.78
Chr1	2111146	-	Chr1.noncapped.709	tRNA_3P	AT1G06880	tRNA_snoRNA	host=AT1G04527;tRNA=gly_GCC	2.47	0.65	0.95	1.05	0.85	0.46	2.58	1.33	0.78
Chr1	2111217	-	Chr1.noncapped.709	tRNA_5P	AT1G06880	tRNA_snoRNA	host=AT1G04527;tRNA=gly_GCC	0	1.17	1.2	0	1.73	0.38	0	0	0
Chr1	2538237	-	Chr1.noncapped.869	snRNA_5P	AT1G08115	unit	snRNA=U1A	0	0.7	0.97	0	2.87	0	0	0.38	0.04
Chr1	2879297	+	Chr1.noncapped.963	tRNA_TSS	AT1G08950	unit	tRNA=pro_AGG	0.03	0	0	0.17	0	0.18	0	0	0
Chr1	2879302	+	Chr1.noncapped.963	tRNA_5P	AT1G08950	unit	tRNA=pro_AGG	0.17	0.02	0	0.23	0	0.71	0	0.01	0
Chr1	3180733	-	Chr1.noncapped.1071	snRNA_5P	AT1G04733	unit	snRNA=U2	12.11	12.7	7.7	11.9	55.52	9.46	11.31	23.24	6.59
Chr1	3676606	+	Chr1.capped.1210	tRNA_5P	AT1G11010	UTR	host=AT1G11020;tRNA=met_CAT	0.67	0	0	0.07	0.19	0.25	0	0	0
Chr1	3961365	-	Chr1.noncapped.1282	miRNA_3p3P	AT1G11735	unit	name=ath-miR171b	0.33	0.08	0	0	0	0	0.32	0.25	0.23
Chr1	3961704	-	Chr1.noncapped.1283	miRNA_TSS	AT1G11735	unit	name=ath-miR171b	0.17	0.12	0.18	0	0.83	0.27	0.31	1.06	0.16
Chr1	4058160	+	Chr1.capped.1319	snoRNA_TSS	AT1G12013|AT1G12015	tandem	cluster=2	2.97	1.58	2.09	3.13	3.72	2.43	1.9	1.77	1.32
Chr1	4058270	+	Chr1.capped.1319	snoRNA_5P	AT1G12013	tandem	cluster=2;position=1	1.27	0.93	0.43	0	0	0	1.17	2.03	0.7
Chr1	4058485	+	Chr1.noncapped.1320	snoRNA_5P	AT1G12015	tandem	cluster=2;position=2	7.56	2.92	1.05	0	0.73	0	3.44	2.32	1.24
Chr1	4182699	-	Chr1.capped.1348	miRNA_TSS	AT1G12294	unit	name=ath-miR472	0.05	0	0.05	0	0.62	0.16	0	0.08	0.23
Chr1	4522781	-	Chr1.noncapped.1458	tRNA_5P	AT1G13240	unit	tRNA=ile_AAT	0.32	0	0.12	0	1.67	0.44	0.11	0.12	0
Chr1	4820429	-	Chr1.capped.1537	miRNA_TSS	AT1G14071	unit	name=ath-miR830	0.95	0.65	0.25	0.6	1.08	0.39	1.73	0.81	1.64
Chr1	5170423	-	Chr1.noncapped.1641	snoRNA_5P	AT1G05137	unit		0.64	1.26	0.6	0	0	0	2.14	2.98	1.01
Chr1	5170571	-	Chr1.capped.1642	snoRNA_TSS	AT1G05137	unit		3.74	1.17	0.8	5.97	3.98	3.81	1.6	0.46	0.86
Chr1	5686178	-	Chr1.noncapped.1826	snoRNA_5P	AT1G05247	unit		28.09	14.19	10.88	0	0	0	9.23	5.66	4.75
Chr1	5686337	-	Chr1.capped.1827	snoRNA_TSS	AT1G05247	unit		3.02	2.79	2.55	2.92	10.26	4.91	5.77	4.7	1.95
Chr1	6076017	-	Chr1.noncapped.1945	tRNA_5P	AT1G17670	unit	tRNA=val_AAC	9.1	4.07	0	9.97	0	4.26	0.58	0	0
Chr1	6220233	+	Chr1.capped.1997	miRNA_TSS	AT1G18075	unit	name=ath-miR159b	2.99	2.45	2.47	1.12	1.74	5.14	2.16	1.74	1.95
Chr1	6465868	-	Chr1.noncapped.2068	snoRNA_5P	AT1G05417	tandem	cluster=4;position=4	13.45	7.46	9.19	3.1	3.41	3.1	5.15	6.35	4.13
Chr1	6466008	-	Chr1.noncapped.2069	snoRNA_5P	AT1G05423	tandem	cluster=4;position=3	5.55	3.99	4.28	0.55	3.6	1.37	3.47	1.6	1.79
Chr1	6466184	-	Chr1.noncapped.2070	snoRNA_5P	AT1G05427	tandem	cluster=4;position=3	13.82	4.72	2.79	0.23	0.3	0.2	5.68	6.56	1.79
Chr1	6466370	-	Chr1.noncapped.2072	snoRNA_5P	AT1G05433	tandem	cluster=4;position=1	77.74	8.58	4.58	52.37	189.38	38.49	24.54	18.19	36.93
Chr1	6466453	-	Chr1.noncapped.2072	snoRNA_TSS	AT1G05433|AT1G05427|AT1G05423|AT1G05417	tandem	cluster=4	1.36	1.06	1.15	1.41	1.89	1.15	1	1.65	1.25
Chr1	6520752	+	Chr1.capped.2082	miRNA_TSS	AT1G18879	intron	host=AT1G18880;name=ath-miR837	0.65	0.26	0.19	0.97	0.27	0.24	0.06	0.14	0.93
Chr1	6697054	+	Chr1.noncapped.2128	snoRNA_TSS	AT1G19373|AT1G19376	tandem	cluster=2	0.63	0.46	0.56	0.72	0.94	1.73	0.8	0	0.55
Chr1	6697177	+	Chr1.noncapped.2128	snoRNA_5P	AT1G19373	tandem	cluster=2;position=1	21.18	5.42	2.29	1.83	0.22	2.73	3.41	3.04	1.33
Chr1	6697437	+	Chr1.noncapped.2129	snoRNA_5P	AT1G19376	tandem	cluster=2;position=2	2.36	2.44	1.17	0	0	0	0.78	1.24	0
Chr1	6941173	+	Chr1.capped.2206	snoRNA_TSS	AT1G20015	unit		2.2	0.96	1.24	4.56	3.44	0.88	0.76	0.63	0.39
Chr1	6941284	+	Chr1.capped.2206	snoRNA_5P	AT1G20015	unit		2.42	1.26	1.61	0	0	0	3.5	1.73	1.87
Chr1	7082662	+	Chr1.noncapped.2251	tRNA_TSS	AT1G20420	unit	tRNA=pro_TGG	0	0.24	0.1	0.42	0.45	0.05	0	0.42	0
Chr1	7082667	+	Chr1.noncapped.2251	tRNA_5P	AT1G20420	unit	tRNA=pro_TGG	0	0.67	0.28	1.38	2.83	2.26	0	1.05	0
Chr1	7176197	-	Chr1.noncapped.2281	snoRNA_5P	AT1G05563	unit		1.18	1.14	0.56	0	0	0	0.3	0.12	0.24
Chr1	7176376	-	Chr1.capped.2282	snoRNA_TSS	AT1G05563	unit		6.3	15.38	13.98	16.71	14.06	13.22	16.62	16.19	9.97
Chr1	8525212	-	Chr1.noncapped.2666	snRNA_5P	AT1G05853	unit	snRNA=U5	0.11	0.36	0.21	0.39	0.62	0.2	0.06	0	0
Chr1	8756301	-	Chr1.noncapped.2728	snoRNA_5P	AT1G05907	tandem	cluster=2;position=2	20.88	6.15	2.94	0.13	0	0.51	15.28	13.07	2.57
Chr1	8756449	-	Chr1.noncapped.2729	snoRNA_5P	AT1G05917	tandem	cluster=2;position=1	148.34	42.66	24.71	32.31	21.27	11.08	51.2	46.57	16.75
Chr1	8756591	-	Chr1.noncapped.2729	snoRNA_TSS	AT1G05917|AT1G05907	tandem	cluster=2	0.75	1.14	0.86	0.73	2.08	1.22	0.79	0.68	0.16
Chr1	9076199	-	Chr1.noncapped.2822	snoRNA_5P	AT1G26233	tandem	cluster=3;position=3	0.67	0.84	0.54	0	0	0	0.47	0.42	0
Chr1	9076384	-	Chr1.noncapped.2823	snoRNA_5P	AT1G05993	tandem	cluster=3;position=2	183.28	74.14	26.33	0.73	2.89	0.2	64.18	53.27	26.65
Chr1	9076600	-	Chr1.noncapped.2824	snoRNA_5P	AT1G05997	tandem	cluster=3;position=1	0.37	0.04	0.2	0	0	0	0	0.11	0
Chr1	9076738	-	Chr1.capped.2825	snoRNA_TSS	AT1G05997|AT1G05993|AT1G26233	tandem	cluster=3	1.53	0.81	0.95	2.36	0.9	0.51	3.1	0.2	0.7
Chr1	9316160	-	Chr1.noncapped.2885	snoRNA_5P	AT1G06033	intron	host=AT1G26880	2.21	5.97	4.57	0	0	0.06	2.12	3.1	0.63
Chr1	9316701	-	Chr1.capped.2886	snoRNA_TSS	AT1G06033	intron	host=AT1G26880	56.11	82.1	94.67	78.43	87.49	69.91	117.21	102.4	86.09
Chr1	9515194	+	Chr1.capped.2943	snoRNA_TSS	AT1G06087	intron	host=AT1G27400	116.44	168.23	250.65	61.48	149.26	248.59	177.54	109.76	82.35
Chr1	9515610	+	Chr1.noncapped.2945	snoRNA_5P	AT1G06087	intron	host=AT1G27400	2.28	0.9	0.94	0.28	0	0.23	0.22	0.1	0.31
Chr1	10151771	-	Chr1.capped.3111	snoRNA_5P	AT1G29071	unit		3.07	1.99	1.21	8.15	5.48	8.34	0.95	0.58	1.87
Chr1	10151794	-	Chr1.capped.3111	snoRNA_TSS	AT1G29071	unit		14.43	13.04	6.33	28.71	18.19	8.72	11.49	5.78	3.87
Chr1	10300212	+	Chr1.capped.3143	snoRNA_TSS	AT1G06233|AT1G06237|AT1G06243|AT1G06247|AT1G06253	tandem	cluster=5	5.51	9.07	12.16	13.32	10.86	15.26	25.18	18.79	31.09
Chr1	10300356	+	Chr1.noncapped.3144	snoRNA_5P	AT1G06233	tandem	cluster=5;position=1	56.09	34.33	28.66	0.43	3.26	0.16	33.31	24.81	17.14
Chr1	10300487	+	Chr1.noncapped.3145	snoRNA_5P	AT1G06237	tandem	cluster=5;position=2	33.61	14.48	6.73	5.32	7.98	5.36	27.47	13.72	14.65
Chr1	10300618	+	Chr1.capped.3146	snoRNA_5P	AT1G06243	tandem	cluster=5;position=3	10.97	4.64	3.33	1.13	2.41	0.74	5.51	4.36	2.88
Chr1	10300750	+	Chr1.noncapped.3147	snoRNA_5P	AT1G06247	tandem	cluster=5;position=4	23.06	8.03	8.2	0.07	0	0	3.51	0	1.32
Chr1	10300877	+	Chr1.noncapped.3148	snoRNA_5P	AT1G06253	tandem	cluster=5;position=5	5.03	13.98	27.4	0.46	0.33	0.06	2.87	6.54	2.72
Chr1	10308560	+	Chr1.capped.3154	snoRNA_TSS	AT1G06263|AT1G06267|AT1G06273|AT1G06277|AT1G06283	tandem	cluster=5	4.86	4.92	9.74	10.71	14.81	5.03	8.64	11.56	14.8
Chr1	10308750	+	Chr1.noncapped.3155	snoRNA_5P	AT1G06263	tandem	cluster=5;position=1	8.83	2.65	1.9	0	0.58	0	4.12	1.71	1.4
Chr1	10308879	+	Chr1.noncapped.3156	snoRNA_5P	AT1G06267	tandem	cluster=5;position=2	3.04	0.66	0.46	0.1	0.45	1.51	1.14	0.36	0.94
Chr1	10309010	+	Chr1.capped.3157	snoRNA_5P	AT1G06273	tandem	cluster=5;position=3	1.55	0.97	1.23	0.1	0	0.69	0.22	0.53	0.47
Chr1	10309134	+	Chr1.noncapped.3158	snoRNA_5P	AT1G06277	tandem	cluster=5;position=4	0	0.03	0	0.07	0	0	3.51	4.51	1.32
Chr1	10309260	+	Chr1.noncapped.3159	snoRNA_5P	AT1G06283	tandem	cluster=5;position=5	5.03	0	6.28	0.46	0.33	0.22	2.87	2.18	0
Chr1	11043744	-	Chr1.capped.3316	snoRNA_TSS	AT1G06397	UTR	host=AT1G30970	2.7	2.36	1.57	2.98	1.49	2.78	4.34	5.52	9.51
Chr1	11423683	-	Chr1.capped.3389	snoRNA_TSS	AT1G06453	unit		1.04	0.97	1.72	0.97	0.56	0.55	1.07	0.54	0.47
Chr1	11435611	-	Chr1.noncapped.3393	snoRNA_5P	AT1G06457	intron	host=AT1G31860;cluster=3;position=3	1.62	0.74	0.52	0.25	1.89	0.37	1	1.62	0.78
Chr1	11435981	-	Chr1.noncapped.3394	snoRNA_5P	AT1G06463	intron	host=AT1G31860;cluster=3;position=2	40.07	31.03	19.82	0.31	1.06	0.29	35.23	22.17	15.82
Chr1	11436270	-	Chr1.noncapped.3395	snoRNA_5P	AT1G06467	intron	host=AT1G31860;cluster=3;position=1	172.68	37.47	21.39	2.64	8.4	2.52	107.01	80.85	63.03
Chr1	11436606	-	Chr1.capped.3397	snoRNA_TSS	AT1G06457|AT1G06463|AT1G06457	intron	host=AT1G31860;cluster=3	8.17	9.96	16.71	4.72	14.19	7.39	8.13	11.11	20.95
Chr1	11684686	+	Chr1.capped.3461	snoRNA_TSS	AT1G06547|AT1G32385|AT1G06553	tandem	cluster=3	1.25	3.86	4.46	4.14	5.45	2.26	3.33	4.83	1.01
Chr1	11685233	+	Chr1.noncapped.3462	snoRNA_5P	AT1G06553	tandem	cluster=3;position=3	2.51	1.98	1.15	0.75	0	0.03	2.23	1.16	0.78
Chr1	11957493	+	Chr1.capped.3514	miRNA_TSS	AT1G32992	unit	name=ath-miR856	0	0.42	0.39	0.11	0	0	0.41	0.27	0.23
Chr1	12083889	+	Chr1.capped.3541	snoRNA_TSS	AT1G06667	unit		0.43	0.56	0.24	0.81	0.35	0.63	0.29	0.11	0.23
Chr1	12083968	+	Chr1.noncapped.3542	snoRNA_5P	AT1G06667	unit		0.95	0.16	0.15	0.23	1.67	2.61	0.68	0.25	0.63
Chr1	16767531	-	Chr1.capped.3786	miRNA_TSS	AT1G07243	intron	host=AT1G44100;name=ath-miR5024	2.69	5.8	4.55	2.79	2.04	5.8	2.25	9.98	3.43
Chr1	17483987	-	Chr1.noncapped.3895	snoRNA_5P	AT1G07393	unit		31.03	10.76	6.04	20.07	24.95	8.28	20.42	18.28	5.06
Chr1	17484156	-	Chr1.capped.3896	snoRNA_TSS	AT1G07393	unit		3.74	5.12	4.51	3.55	7.35	3.84	4.33	3.49	1.4
Chr1	17825623	+	Chr1.capped.3950	miRNA_TSS	AT1G48267	unit	name=ath-miR161	0.17	0.13	0.75	0.51	0	0.37	0.6	0.07	0.23
Chr1	17910668	+	Chr1.capped.3970	snoRNA_TSS	AT1G07487	unit		0.37	0.22	0	0	0.86	0.1	1.64	0.54	0.7
Chr1	17910853	+	Chr1.capped.3970	snoRNA_5P	AT1G07487	unit		2.72	1	0.61	0	0	0	1.05	0.67	0.39
Chr1	18428173	-	Chr1.capped.4096	snoRNA_TSS	AT1G07593	unit		0.61	0.68	0.69	1.64	1.48	1.56	0.14	0.63	0.31
Chr1	19981420	+	Chr1.capped.4437	snoRNA_TSS	AT1G07897|AT1G07903	tandem	cluster=2	6.93	16.62	25.16	18.58	21.02	25.81	17.25	12.13	6.39
Chr1	20259821	+	Chr1.capped.4522	snoRNA_TSS	AT1G07957	intron	host=AT1G54270	20.53	19.41	20.65	58.86	11.06	18.85	28.02	36.53	69.34
Chr1	20260249	+	Chr1.noncapped.4523	snoRNA_5P	AT1G07957	intron	host=AT1G54270	1.35	1.5	0.48	0	0	0	0.95	0.38	1.01
Chr1	21052419	-	Chr1.noncapped.4724	snoRNA_5P	AT1G08107	tandem	cluster=4;position=4	6.29	1.46	1.7	3.44	4.74	1.36	0.77	0.86	0.86
Chr1	21052564	-	Chr1.noncapped.4725	snoRNA_5P	AT1G08113	tandem	cluster=4;position=3	3.36	2.53	1.36	0.33	0.79	0.58	1.14	1.09	0.63
Chr1	21052714	-	Chr1.noncapped.4726	snoRNA_5P	AT1G08117	tandem	cluster=4;position=2	17.92	4	2.46	5.46	17.49	4.97	5.72	2.5	5.07
Chr1	21052952	-	Chr1.noncapped.4727	snoRNA_5P	AT1G08123	tandem	cluster=4;position=1	3.4	0.48	0.55	0.25	0.77	0	0.78	0.47	0.47
Chr1	21053167	-	Chr1.capped.4728	snoRNA_TSS	AT1G08123|AT1G08117|AT1G08113|AT1G08107	tandem	cluster=4	0.55	0.26	0.39	0.06	0.93	0	0.18	0	0.08
Chr1	22313411	-	Chr1.capped.4945	snoRNA_5P	AT1G08327	tRNA_snoRNA	host=AT1G60580;tRNA=gly_GCC	0	0.1	0.11	0.25	0	0	0.06	0.12	0
Chr1	22313411	-	Chr1.capped.4945	tRNA_3P	AT1G60580	tRNA_snoRNA	host=AT1G08327;tRNA=gly_GCC	0	0.1	0.11	0.25	0	0	0.06	0.12	0
Chr1	22313483	-	Chr1.capped.4945	snoRNA_TSS	AT1G08327	tRNA_snoRNA	host=AT1G60580;tRNA=gly_GCC	0	0	0	0.24	0	0	0.54	0	0
Chr1	22313488	-	Chr1.capped.4945	tRNA_TSS	AT1G60580	tRNA_snoRNA	host=AT1G08327;tRNA=gly_GCC	0	0	0	0.09	0	0	0.33	0	0
Chr1	22394634	-	Chr1.noncapped.4973	snoRNA_5P	AT1G08347	tRNA_snoRNA	host=AT1G60820;tRNA=gly_GCC	0.31	0	0.21	0	0.37	0	0	0.42	0
Chr1	22394634	-	Chr1.noncapped.4973	tRNA_3P	AT1G60820	tRNA_snoRNA	host=AT1G08347;tRNA=gly_GCC	0.31	0	0.21	0	0.37	0	0	0.42	0
Chr1	22397587	-	Chr1.capped.4974	tRNA_3P	AT1G60840	unit	tRNA=gly_GCC	0.94	0.17	0.06	0.1	0.45	0	0.56	0.07	0.51
Chr1	22397661	-	Chr1.capped.4974	tRNA_5P	AT1G60840	unit	tRNA=gly_GCC	0.53	0.19	0.13	0.08	5.54	0.33	0.3	0	0.21
Chr1	22397666	-	Chr1.capped.4974	tRNA_TSS	AT1G60840	unit	tRNA=gly_GCC	0.97	0.12	0.26	0.1	2.15	0.48	0.35	0	0.16
Chr1	22428161	+	Chr1.noncapped.4980	tRNA_TSS	AT1G60910	tRNA_snoRNA	host=AT1G08353;tRNA=gly_GCC	0	0	0	0.57	0	0	0.37	0.63	0
Chr1	22428166	+	Chr1.noncapped.4980	snoRNA_TSS	AT1G08353	tRNA_snoRNA	host=AT1G60910;tRNA=gly_GCC	0.15	0	0	7.05	0	0	0.59	1.1	0.22
Chr1	22428166	+	Chr1.noncapped.4980	tRNA_5P	AT1G60910	tRNA_snoRNA	host=AT1G08353;tRNA=gly_GCC	0.15	0	0	7.05	0	0	0.59	1.1	0.22
Chr1	22428240	+	Chr1.noncapped.4980	snoRNA_5P	AT1G08353	tRNA_snoRNA	host=AT1G60910;tRNA=gly_GCC	5.41	1.18	0.99	0.25	0.5	0.93	1.56	1.32	1.48
Chr1	22428240	+	Chr1.noncapped.4980	tRNA_3P	AT1G60910	tRNA_snoRNA	host=AT1G08353;tRNA=gly_GCC	5.41	1.18	0.99	0.25	0.5	0.93	1.56	1.32	1.48
Chr1	22603121	+	Chr1.capped.5021	snRNA_5P	AT1G61275	unit	snRNA=U12	4.42	3.47	3.01	7.54	11.37	7.46	8.91	5.07	5.92
Chr1	22795425	+	Chr1.capped.5074	miRNA_TSS	AT1G61732	unit	name=ath-miR776	0.8	0.7	0.69	0.28	0.38	1.31	1.17	0.8	0.62
Chr1	22887085	+	Chr1.noncapped.5095	tRNA_TSS	AT1G61910	unit	tRNA=leu_TAG	0.1	0	0	0.19	0.35	0.22	0.3	0.1	0.08
Chr1	22887089	+	Chr1.noncapped.5095	tRNA_5P	AT1G61910	unit	tRNA=leu_TAG	0.07	0	0	0.11	0.39	0	0.09	0	0
Chr1	22930419	-	Chr1.capped.5106	miRNA_TSS	AT1G62035	unit	name=ath-miR171c	0.18	0.18	0.32	1.13	0.89	0.61	0.97	0.5	0.08
Chr1	23056471	+	Chr1.capped.5133	miRNA_TSS	AT1G62355	sense	host=AT1G62355;name=ath-miR413	1.36	0.99	1.71	3.83	1.86	1.26	1.89	0.17	1.01
Chr1	23701177	+	Chr1.capped.5294	snoRNA_TSS	AT1G08643	unit		12.83	6.95	3.27	5.63	9.58	14.78	6.61	4.44	2.86
Chr1	23701201	+	Chr1.capped.5294	snoRNA_5P	AT1G08643	unit		7.05	1.18	0.74	0.22	0	0.38	1.16	0.59	0.86
Chr1	24883919	+	Chr1.capped.5559	miRNA_TSS	AT1G66725	unit	name=ath-miR163	21.07	9.59	17.92	9.73	18.39	40.56	76.56	126.8	146.71
Chr1	25137916	-	Chr1.capped.5600	miRNA_TSS	AT1G67195	unit	name=ath-miR414	5.53	8.69	12.77	5.74	7.13	8.84	7.8	15.27	11.45
Chr1	25262183	+	Chr1.capped.5627	snoRNA_TSS	AT1G08937	intron	host=AT1G67430	270.01	209.42	178.61	804.87	184.85	191.96	303.6	215.51	469.49
Chr1	25262561	+	Chr1.noncapped.5628	snoRNA_5P	AT1G08937	intron	host=AT1G67430	4.12	1.67	0.89	0.94	0	0	1.49	2.79	0.78
Chr1	25278989	-	Chr1.noncapped.5633	miRNA_3p3P	AT1G67481	unit	name=ath-miR839	1.14	1.96	1.43	0	0	0	3.22	6.14	2.26
Chr1	25279054	-	Chr1.noncapped.5633	miRNA_3p5P	AT1G67481	unit	name=ath-miR839	0.17	0.27	0.12	0	0	0	0.34	1.05	0
Chr1	25279892	-	Chr1.capped.5634	miRNA_TSS	AT1G67481	unit	name=ath-miR839	1.25	3.86	5.92	2	8.31	0.77	2.16	4.47	0.93
Chr1	25829076	+	Chr1.capped.5784	tRNA_TSS	AT1G68770	UTR	host=AT1G68760;tRNA=pro_AGG	5.6	3.79	4.41	8.88	3.02	7.5	7.26	5.74	13.09
Chr1	25927328	-	Chr1.capped.5806	snoRNA_TSS	AT1G09027	unit		37.54	62.42	42.35	38.98	86.37	44.35	55.46	45.12	29.37
Chr1	26189838	+	Chr1.capped.5881	snoRNA_TSS	AT1G09083|AT1G09087	intron	host=AT1G69620;cluster=2	77.17	80.49	88.47	147.76	82.38	105.42	134.63	109.65	89.83
Chr1	26190297	+	Chr1.noncapped.5882	snoRNA_5P	AT1G09083	intron	host=AT1G69620;cluster=2;position=1	12.31	5.14	2.58	3.04	0.36	0.15	7.58	3.34	4.79
Chr1	26190539	+	Chr1.noncapped.5883	snoRNA_5P	AT1G09087	intron	host=AT1G69620;cluster=2;position=2	1.47	0.75	0.68	0.39	0	0	1.69	0.58	0.87
Chr1	26638076	+	Chr1.capped.5998	miRNA_TSS	AT1G70645	sense	host=AT1G70650;name=ath-miR777	0.16	0.35	0.13	0.05	0	0.2	0.06	0.39	0.16
Chr1	26772857	+	Chr1.capped.6044	miRNA_TSS	AT1G09213	unit	name=ath-miR858b	0.07	0	0.17	1.34	0	0.09	0.2	0.32	0.16
Chr1	26971227	+	Chr1.capped.6098	tRNA_TSS	AT1G71700	UTR	host=AT1G71697;tRNA=gly_GCC	0.39	2.37	1.54	1.67	2.03	5.64	0.69	3.22	0.47
Chr1	26973388	+	Chr1.noncapped.6099	tRNA_5P	AT1G71700	UTR	host=AT1G71697;tRNA=gly_GCC	0.96	0.19	0.11	0.54	1.17	0.39	0	0	0
Chr1	27348388	+	Chr1.capped.6203	snoRNA_TSS	AT1G09333	unit		17.64	14.26	15.13	16.02	13.06	38.41	18.08	28.4	42.62
Chr1	27713232	-	Chr1.noncapped.6328	miRNA_3p3P	AT1G73687	unit	name=ath-miR159a	0.1	0.24	0.28	0	0	0	0.57	1.05	0.08
Chr1	27713253	-	Chr1.noncapped.6328	miRNA_3p5P	AT1G73687	unit	name=ath-miR159a	0	0	0.06	0	0	0	0.28	0	0
Chr1	27713699	-	Chr1.capped.6329	miRNA_TSS	AT1G73687	unit	name=ath-miR159a	2.81	3.51	2.28	1.97	3.38	4.38	1.26	2.71	0.7
Chr1	27984754	-	Chr1.noncapped.6419	snoRNA_5P	AT1G74453	tandem	cluster=3;position=3	17.46	8.64	8.87	2.06	1.99	2.53	6.27	4.14	3.12
Chr1	27984874	-	Chr1.noncapped.6420	snoRNA_5P	AT1G74456	tandem	cluster=3;position=2	26.31	11.68	7.34	1.07	0.37	0.19	14.83	7.07	3.81
Chr1	27985041	-	Chr1.noncapped.6421	snoRNA_5P	AT1G09467	tandem	cluster=3;position=1	56.76	8.33	4.01	16.22	55.76	10.9	11.53	10.49	8.5
Chr1	27985173	-	Chr1.capped.6422	snoRNA_TSS	AT1G09467|AT1G74456|AT1G74453	tandem	cluster=3	3.96	7.25	10.23	6.09	9.93	6.24	14.52	19.07	8.1
Chr1	27987021	+	Chr1.capped.6423	miRNA_TSS	AT1G09473	sense	host=AT1G74458;name=ath-miR415	0.46	0.87	0.92	0.47	0.33	0.59	1.02	0.82	0.46
Chr1	28212056	+	Chr1.capped.6502	snoRNA_TSS	AT1G09533|AT1G75163|AT1G75166	tandem	cluster=3	6.08	3.79	6.11	9.82	7.96	5.07	7.24	7.92	3.12
Chr1	28212197	+	Chr1.noncapped.6503	snoRNA_5P	AT1G09533	tandem	cluster=3;position=1	15.45	8.73	7.37	0	0	0	7.72	3.79	2.65
Chr1	28212394	+	Chr1.capped.6504	snoRNA_5P	AT1G75163	tandem	cluster=3;position=2	9.42	4	3.19	0.35	0	0	6.82	3.55	4.36
Chr1	28212517	+	Chr1.noncapped.6505	snoRNA_5P	AT1G75166	tandem	cluster=3;position=3	31.72	12.77	13.28	0.26	0.57	0.3	6.43	6.01	2.26
Chr1	28545393	-	Chr1.capped.6621	miRNA_TSS	AT1G76062	sense	host=AT1G76065;name=ath-miR835	3.11	3.8	3.19	2.25	3.27	2.72	6.17	4.72	5.92
Chr1	28568636	+	Chr1.noncapped.6632	miRNA_TSS	AT1G76135	unit	name=ath-miR394b	0.15	0.12	0.29	0.64	0.4	0.44	0.39	0.35	0.08
Chr1	28889134	+	Chr1.capped.6740	miRNA_TSS	AT1G09687	unit	name=ath-miR4228	3.91	2.74	2.04	5.48	3.85	5.04	9.75	5.98	4.21
Chr1	29016121	+	Chr1.capped.6780	miRNA_TSS	AT1G77235	intron	host=AT1G77230;name=ath-miR402	2.63	2.6	2.9	3.17	2.95	3.62	8.72	9.17	12.85
Chr1	29422098	+	Chr1.capped.6899	snoRNA_TSS	AT1G09787	unit		3.64	2.17	3	5.86	2.56	1.8	3.92	2.99	3.51
Chr1	29422098	+	Chr1.capped.6899	miRNA_TSS	AT1G78206	tandem	host=AT1G09787;name=ath-miR775	3.64	2.17	3	5.86	2.56	1.8	3.92	2.99	3.51
Chr1	29422216	+	Chr1.noncapped.6900	snoRNA_5P	AT1G09787	unit		1.76	1.95	1.96	0	0	0	3.72	1.34	1.63
Chr1	29523876	+	Chr1.capped.6929	miRNA_TSS	AT1G78478	intron	host=AT1G78476;name=ath-miR833a	0.42	2.66	1.47	1.38	1.61	4.87	1.11	1.45	1.32
Chr1	29911378	-	Chr1.noncapped.7052	snoRNA_5P	AT1G09867	tandem	cluster=4;position=4	6.6	7.18	5.34	0.15	2.28	0.11	5.35	5.24	3.24
Chr1	29911561	-	Chr1.noncapped.7053	snoRNA_5P	AT1G09873	tandem	cluster=4;position=3	1.97	0.76	0.79	0	0	0.61	0.74	0.69	0.42
Chr1	29911707	-	Chr1.noncapped.7054	snoRNA_5P	AT1G09877	tandem	cluster=4;position=2	181.67	74.31	25.35	205.07	214.89	118.15	136.89	66.89	30.86
Chr1	29911811	-	Chr1.capped.7055	snoRNA_5P	AT1G09883	tandem	cluster=4;position=1	5.19	2.9	1.76	0.11	0.51	0.15	4.52	1.36	0.39
Chr1	29911896	-	Chr1.capped.7055	snoRNA_TSS	AT1G09883|AT1G09877|AT1G09873|AT1G09867	tandem	cluster=4	1.8	2.99	3.71	2.35	2.85	1.91	4.44	3.35	3.66
Chr2	2657	+	Chr2.capped.6	miRNA_TSS	AT2G03855	unit	name=miR5642b	1.27	3.12	0.33	0.43	0.38	0.33	0	0.15	0.04
Chr2	852859	+	Chr2.capped.192	snRNA_5P	AT2G04455	unit	snRNA=U2	0.01	0	1.07	0	0.17	0.96	0	0.57	0.1
Chr2	2184645	-	Chr2.noncapped.391	snoRNA_5P	AT2G05765	tandem	cluster=3;position=3	28.34	22.49	17.43	0	0.63	0.03	9.14	9.84	5.29
Chr2	2184822	-	Chr2.noncapped.392	snoRNA_5P	AT2G04955	tandem	cluster=3;position=2	4.37	10.04	10.97	0	0.5	0.2	6.92	9.99	1.79
Chr2	2185089	-	Chr2.capped.393	snoRNA_5P	AT2G04965	tandem	cluster=3;position=1	2.98	2.08	4.37	0.13	0	0.57	3.25	1.31	1.64
Chr2	2185200	-	Chr2.capped.394	snoRNA_TSS	AT2G04965|AT2G04955|AT2G05765	tandem	cluster=3	9.94	10.35	8.64	9.33	14.69	4.71	12.75	8.49	5.3
Chr2	3255830	-	Chr2.noncapped.469	tRNA_3P	AT2G07743	unit	tRNA=thr_CGT	0.25	0.61	0.81	0	0	0	0.27	0.6	0.16
Chr2	3255904	-	Chr2.noncapped.469	tRNA_5P	AT2G07743	unit	tRNA=thr_CGT	1.34	0.47	0.46	0.05	0.73	0.05	0.64	0.48	0.78
Chr2	3268687	+	Chr2.noncapped.475	tRNA_TSS	AT2G07745	tandem	host=AT2G07674;tRNA=tyr_GTA	0.36	0.25	0.27	0.13	1.96	0.22	0.11	0.32	0.03
Chr2	3268799	+	Chr2.noncapped.475	tRNA_5P	AT2G07745	tandem	host=AT2G07674;tRNA=tyr_GTA	0.42	0.14	0.26	0.05	0.27	0.31	0.4	0.15	0.12
Chr2	3268880	+	Chr2.noncapped.476	tRNA_3P	AT2G07745	tandem	host=AT2G07674;tRNA=tyr_GTA	1.17	0.93	0.75	0	0.2	0.13	2.57	1.17	1.56
Chr2	3276439	+	Chr2.noncapped.484	tRNA_5P	AT2G07746	unit	tRNA=gln_TTG	0.57	0	0.03	0	0	0	0	0	0.04
Chr2	3276511	+	Chr2.noncapped.484	tRNA_3P	AT2G07746	unit	tRNA=gln_TTG	0.63	0.33	0.59	0.12	0.2	0	0.17	0.46	0.04
Chr2	3280936	+	Chr2.noncapped.486	tRNA_3P	AT2G07748	tandem	host=AT2G07678;tRNA=trp_CCA	1.85	1.49	1.73	0	0	0	1.07	0.87	0.19
Chr2	3303242	-	Chr2.noncapped.495	tRNA_3P	AT2G07752	tandem	host=AT2G07774;cluster=3;position=3;tRNA=glu_TTC	2.85	3.1	2.71	0.12	0.21	0	2.11	3.63	1.17
Chr2	3303314	-	Chr2.noncapped.495	tRNA_5P	AT2G07752	tandem	host=AT2G07774;cluster=3;position=3;tRNA=glu_TTC	0.52	0.22	0.05	0.34	1.84	0.1	0.3	0.49	0.08
Chr2	3303733	-	Chr2.noncapped.496	tRNA_3P	AT2G07754	tandem	host=AT2G07774;cluster=3;position=1;tRNA=ser_GCT	10.12	3.85	6.96	1.3	1.54	0.23	0	6.96	3.27
Chr2	3303821	-	Chr2.noncapped.496	tRNA_5P	AT2G07754	tandem	host=AT2G07774;cluster=3;position=1;tRNA=ser_GCT	4.45	1.15	2.36	0.78	3.71	0.34	0	2.47	2.1
Chr2	3332379	+	Chr2.noncapped.512	tRNA_TSS	AT2G07792	unit	tRNA=tyr_GTA	2.95	2.43	3.33	0.58	1.05	0.46	1.47	0.94	1.33
Chr2	3332685	+	Chr2.noncapped.513	tRNA_5P	AT2G07792	unit	tRNA=tyr_GTA	1.23	0	0	0.1	0.32	1.47	0.4	0	0
Chr2	3332759	+	Chr2.noncapped.513	tRNA_3P	AT2G07792	unit	tRNA=tyr_GTA	0.92	1.59	0.58	0	0	0	0.32	0.65	0.46
Chr2	3367708	+	Chr2.noncapped.537	tRNA_TSS	AT2G07793	tandem	host=AT2G07699;tRNA=ser_TGA	1.19	0	1.03	0.13	0.18	0	0.06	0.2	0.08
Chr2	3369440	+	Chr2.noncapped.539	tRNA_3P	AT2G07793	tandem	host=AT2G07699;tRNA=ser_TGA	3.28	1.2	1.66	0	0	0	0.82	0.9	0.57
Chr2	3383401	-	Chr2.noncapped.546	tRNA_3P	AT2G07794	intron	host=AT2G07706;tRNA=ile_CAT	0.59	0.4	0.93	0.05	0.54	0.14	0.06	0.48	0.27
Chr2	3383476	-	Chr2.noncapped.546	tRNA_5P	AT2G07794	intron	host=AT2G07706;tRNA=ile_CAT	0.43	0.64	0.29	0.52	0.57	0.05	0.52	0.42	0.23
Chr2	3383625	-	Chr2.noncapped.546	tRNA_TSS	AT2G07794	intron	host=AT2G07706;tRNA=ile_CAT	0.16	0.29	0.3	0.08	0.42	0.27	0	0.29	0.12
Chr2	3437548	+	Chr2.noncapped.593	tRNA_TSS	AT2G05315	unit	tRNA=phe_GAA	2.01	1.46	5	3.08	2.6	1.02	1.26	1.25	1.43
Chr2	3437573	+	Chr2.noncapped.593	tRNA_5P	AT2G05315	unit	tRNA=phe_GAA	7.34	3.34	13.14	8.49	8.28	5.68	4.24	3.36	1.92
Chr2	3437652	+	Chr2.noncapped.593	tRNA_3P	AT2G05315	unit	tRNA=phe_GAA	7.66	4.98	16.19	0.49	0.1	0.37	4.07	3.7	1.55
Chr2	3444361	-	Chr2.noncapped.598	tRNA_3P	AT2G07756	tandem	host=AT2G07723;tRNA=gly_GCC	6.98	8.82	13.15	0.07	0.5	0.22	4.97	7.74	1.87
Chr2	3444433	-	Chr2.noncapped.598	tRNA_5P	AT2G07756	tandem	host=AT2G07723;tRNA=gly_GCC	1.4	0.7	0.53	0.35	1.79	0.76	0.54	0.62	0.27
Chr2	3444616	-	Chr2.noncapped.599	tRNA_TSS	AT2G07756	tandem	host=AT2G07723;tRNA=gly_GCC	6.08	2.05	1.76	3.34	17.93	1.53	3.38	1.71	0.9
Chr2	3452976	+	Chr2.noncapped.605	tRNA_5P	AT2G07757	unit	tRNA=ser_GGA	0.17	0.02	0.06	0.02	0	0.04	0	0.03	0.04
Chr2	3453063	+	Chr2.noncapped.605	tRNA_3P	AT2G07757	unit	tRNA=ser_GGA	0.58	0.78	0.65	0	0	0	0.14	0.6	0.16
Chr2	3461980	+	Chr2.noncapped.607	tRNA_TSS	AT2G07758	unit	tRNA=met-i_CAT	30.77	0	0	47.56	44.1	44.78	16.7	17.47	16.4
Chr2	3462077	+	Chr2.noncapped.607	tRNA_5P	AT2G07758	unit	tRNA=met-i_CAT	3.67	0	0	2.17	3.09	5.88	0.9	1.05	0.16
Chr2	3462151	+	Chr2.noncapped.607	tRNA_3P	AT2G07758	unit	tRNA=met-i_CAT	2.18	0	2.67	0	0	0	2.9	5.02	5.22
Chr2	3489495	+	Chr2.noncapped.620	tRNA_TSS	AT2G05355	unit	tRNA=tyr_GTA	69.63	20.68	12.03	230.48	219.66	161.74	37.33	79.09	77.26
Chr2	3489578	+	Chr2.noncapped.621	tRNA_5P	AT2G05355	unit	tRNA=tyr_GTA	2.51	0.52	0.67	3.05	4.08	1.85	0.87	0.87	0.29
Chr2	3489657	+	Chr2.noncapped.621	tRNA_3P	AT2G05355	unit	tRNA=tyr_GTA	0	0.48	0.36	0	0	0	0.45	0	0.29
Chr2	3494313	+	Chr2.noncapped.622	tRNA_TSS	AT2G07759|AT2G07761|AT2G07762|AT2G07763|AT2G07764|AT2G07765	tandem	cluster=6	7.83	10.69	9.1	26.7	19.56	16.89	10.66	11.82	13.44
Chr2	3494381	+	Chr2.noncapped.622	tRNA_5P	AT2G07759	tandem	cluster=6;position=1;tRNA=ser_GCT	0	0.56	0.26	0.16	0	3.34	1.66	0.06	0
Chr2	3494469	+	Chr2.noncapped.623	tRNA_3P	AT2G07759	tandem	cluster=6;position=1;tRNA=ser_GCT	0	1.93	0.95	0.08	0.97	1.11	5.53	0.07	0
Chr2	3494775	+	Chr2.noncapped.624	tRNA_5P	AT2G07761	tandem	cluster=6;position=2;tRNA=tyr_GTA	0.7	0.27	1.17	0.68	1.62	0.36	1.74	0.01	0.08
Chr2	3494850	+	Chr2.noncapped.624	tRNA_3P	AT2G07761	tandem	cluster=6;position=2;tRNA=tyr_GTA	29.7	11.99	8.17	0.46	1.68	0.46	16.65	13.86	4.19
Chr2	3495011	+	Chr2.noncapped.625	tRNA_5P	AT2G07762	tandem	cluster=6;position=3;tRNA=pro_TGG	0.29	0.23	0.03	0.09	0	0	0.21	0.23	0
Chr2	3495087	+	Chr2.noncapped.625	tRNA_3P	AT2G07762	tandem	cluster=6;position=3;tRNA=pro_TGG	0.87	1.52	0.96	0	0.32	0	1.64	1.07	0.55
Chr2	3495441	+	Chr2.noncapped.627	tRNA_5P	AT2G07763	tandem	cluster=6;position=4;tRNA=cys_GCA	0.88	0.16	0.29	0.39	0.74	1.22	0.38	0.32	0.19
Chr2	3495512	+	Chr2.noncapped.627	tRNA_3P	AT2G07763	tandem	cluster=6;position=4;tRNA=cys_GCA	4.54	3.05	2.82	0.26	0	0.05	1.92	2.82	3.16
Chr2	3496511	+	Chr2.noncapped.628	tRNA_3P	AT2G07764	tandem	cluster=6;position=5;tRNA=asn_GTT	1.25	1.79	1.4	0	0.24	0	0.9	0.65	0.16
Chr2	3497357	+	Chr2.noncapped.631	tRNA_5P	AT2G07765	tandem	cluster=6;position=6;tRNA=tyr_GTA	0.77	0.33	0.25	0.07	0	0.18	0.18	0.28	0.78
Chr2	3497440	+	Chr2.noncapped.631	tRNA_3P	AT2G07765	tandem	cluster=6;position=6;tRNA=tyr_GTA	10	15.99	13.27	0.12	0.56	0.7	17.46	15.37	0.7
Chr2	3502162	+	Chr2.noncapped.634	tRNA_TSS	AT2G07766	tandem	host=AT2G07741;tRNA=ser_TGA	12.14	21.27	19.73	3.19	4.94	8.1	13.23	14.06	6.33
Chr2	3503608	+	Chr2.noncapped.636	tRNA_3P	AT2G07766	tandem	host=AT2G07741;tRNA=ser_TGA	3.28	1.2	1.66	0	0	0	0.82	0.9	0.57
Chr2	4224966	-	Chr2.capped.647	snoRNA_5P	AT2G05565	unit		0.94	0.2	0.06	0.1	0	0	0.56	0.08	0.51
Chr2	8397870	-	Chr2.capped.1180	miRNA_TSS	AT2G07195	intron	host=AT2G19390;name=ath-miR5632	1.01	0.37	0.07	0	0	0.09	0	0	0.55
Chr2	8931654	-	Chr2.noncapped.1325	snoRNA_5P	AT2G20721	tandem	cluster=3;position=3	27.68	15.9	12.46	0.51	0.55	0.51	10.66	10.35	7.33
Chr2	8931782	-	Chr2.noncapped.1326	snoRNA_5P	AT2G20722	tandem	cluster=3;position=2	28.41	17.7	11.31	32.05	43.23	30.08	31.72	14.81	18.7
Chr2	8931922	-	Chr2.noncapped.1327	snoRNA_5P	AT2G20723	tandem	cluster=3;position=1	23.32	16.17	12.38	9.09	16.63	8.4	14.73	9.81	12.55
Chr2	8932206	-	Chr2.capped.1328	snoRNA_TSS	AT2G20723|AT2G20722|AT2G20721	tandem	cluster=3	1.41	1.9	2.1	1.82	2.75	2.01	3.96	5.57	0.93
Chr2	9560105	+	Chr2.capped.1527	snoRNA_TSS	AT2G07605|AT2G07615	tandem	cluster=2	0.49	0.4	0.37	0.8	0.31	0.24	0.26	0.15	0.08
Chr2	9560105	+	Chr2.capped.1527	miRNA_TSS	AT2G22496	tandem	host=AT2G07605,AT2G07615;name=ath-miR779	0.49	0.4	0.37	0.8	0.31	0.24	0.26	0.15	0.08
Chr2	9560354	+	Chr2.noncapped.1528	snoRNA_5P	AT2G07605	tandem	cluster=2;position=1	10.94	2.66	1.93	0.22	0	0	3.66	3.11	0.62
Chr2	9560535	+	Chr2.noncapped.1529	snoRNA_5P	AT2G07615	tandem	cluster=2;position=3	6.31	4.57	4.16	0	0	0.38	6.85	4.51	0.39
Chr2	9560865	+	Chr2.noncapped.1530	miRNA_3p5P	AT2G22496	tandem	host=AT2G07605,AT2G07615;name=ath-miR779	2.09	2.3	2.19	0	0.53	0	3.67	0.95	1.01
Chr2	9942843	-	Chr2.capped.1619	miRNA_TSS	AT2G23347	intron	host=AT2G23348;name=ath-miR844	0.46	0.45	0.47	0.59	0.31	0.44	0.96	0.44	1.48
Chr2	10026385	-	Chr2.capped.1639	miRNA_TSS	AT2G07910	unit	name=ath-miR5995b	0	0	0	0	0	0	0	0	0
Chr2	10676980	-	Chr2.capped.1778	miRNA_TSS	AT2G25095	unit	name=ath-miR156a	0.1	0.07	0.05	0.19	0.79	0.25	0.15	0.15	0.08
Chr2	10713765	+	Chr2.capped.1784	miRNA_TSS	AT2G25171	intron	host=AT2G25170;name=ath-miR862	0.9	1.33	0.28	1.03	0.91	1.74	1.59	1.98	1.09
Chr2	11159542	+	Chr2.capped.1885	miRNA_TSS	AT2G26211	unit	name=ath-miR825	0.33	0	0.3	0.51	0.3	0.27	0	0.55	0.08
Chr2	12270703	-	Chr2.capped.2137	miRNA_TSS	AT2G08275	intron	host=AT2G28620;name=ath-miR5637	0.46	1.11	0.82	0.28	0.77	0.22	0.4	1.6	0.39
Chr2	12881585	+	Chr2.noncapped.2268	tRNA_TSS	AT2G30180	tRNA_snoRNA	host=AT2G08370;tRNA=gly_GCC	0.06	0	0.06	0	0	0	0.03	0	0
Chr2	12881590	+	Chr2.noncapped.2268	snoRNA_TSS	AT2G08370	tRNA_snoRNA	host=AT2G30180;tRNA=gly_GCC	3.79	0	0.5	0	0	0	0.1	0.13	0
Chr2	12881590	+	Chr2.noncapped.2268	tRNA_5P	AT2G30180	tRNA_snoRNA	host=AT2G08370;tRNA=gly_GCC	3.79	0	0.5	0	0	0	0.1	0.13	0
Chr2	12881663	+	Chr2.noncapped.2268	snoRNA_5P	AT2G08370	tRNA_snoRNA	host=AT2G30180;tRNA=gly_GCC	0.91	0	0	0	0	0	0.14	0.1	0
Chr2	12881663	+	Chr2.noncapped.2268	tRNA_3P	AT2G30180	tRNA_snoRNA	host=AT2G08370;tRNA=gly_GCC	0.91	0	0	0	0	0	0.14	0.1	0
Chr2	12882728	+	Chr2.noncapped.2270	tRNA_TSS	AT2G30190	tRNA_snoRNA	host=AT2G08375;tRNA=gly_GCC	0	0.02	0.02	0.1	0.11	0.09	0	0.03	0
Chr2	12882733	+	Chr2.noncapped.2270	snoRNA_TSS	AT2G08375	tRNA_snoRNA	host=AT2G30190;tRNA=gly_GCC	0	0.29	0.2	0.53	0.44	1.95	0	0.04	0
Chr2	12882733	+	Chr2.noncapped.2270	tRNA_5P	AT2G30190	tRNA_snoRNA	host=AT2G08375;tRNA=gly_GCC	0	0.29	0.2	0.53	0.44	1.95	0	0.04	0
Chr2	12882817	+	Chr2.noncapped.2271	snoRNA_5P	AT2G08375	tRNA_snoRNA	host=AT2G30190;tRNA=gly_GCC	9.44	2.07	1	0.09	1.84	0.12	2.1	0.71	0.39
Chr2	12882817	+	Chr2.noncapped.2271	tRNA_3P	AT2G30190	tRNA_snoRNA	host=AT2G08375;tRNA=gly_GCC	9.44	2.07	1	0.09	1.84	0.12	2.1	0.71	0.39
Chr2	12975945	-	Chr2.noncapped.2300	snoRNA_5P	AT2G08390	tRNA_snoRNA	host=AT2G30450;tRNA=gly_GCC	2.15	0.41	0.64	0	0	0.17	0.08	0.13	0.08
Chr2	12975945	-	Chr2.noncapped.2300	tRNA_3P	AT2G30450	tRNA_snoRNA	host=AT2G08390;tRNA=gly_GCC	2.15	0.41	0.64	0	0	0.17	0.08	0.13	0.08
Chr2	13137307	-	Chr2.noncapped.2344	tRNA_5P	AT2G30850	unit	tRNA=ala_AGC	0.31	0.02	0	0.32	0	0.28	0.04	0	0
Chr2	13137312	-	Chr2.noncapped.2344	tRNA_TSS	AT2G30850	unit	tRNA=ala_AGC	0	0.08	0.07	0.05	0	0	0.14	0	0
Chr2	14098777	+	Chr2.capped.2596	miRNA_TSS	AT2G08555	intron	host=AT2G33255;name=ath-miR8170	1.86	4.53	4.64	6.42	3.25	2.49	7.4	7.95	5.22
Chr2	14162689	+	Chr2.capped.2617	snoRNA_TSS	AT2G08580|AT2G08585	intron	host=AT2G33430;cluster=2	7.25	8.5	11.35	7.85	3.34	11.2	7.5	4.93	4.67
Chr2	14163623	+	Chr2.noncapped.2618	snoRNA_5P	AT2G08580	intron	host=AT2G33430;cluster=2;position=1	1.52	0.15	0.3	0	0	0	0.85	0.35	0.39
Chr2	14894456	-	Chr2.noncapped.2822	snoRNA_5P	AT2G35382	tandem	cluster=4;position=4	715.15	210.27	62.39	1140.53	957.69	582.53	221.69	151.9	239.1
Chr2	14894626	-	Chr2.noncapped.2823	snoRNA_5P	AT2G35384	tandem	cluster=4;position=3	97.71	52.79	29.09	0.91	1.89	0.9	27.9	22.78	13.55
Chr2	14894795	-	Chr2.noncapped.2824	snoRNA_5P	AT2G35387	tandem	cluster=4;position=2	63.64	19.09	13.06	0.15	1.51	0	18.51	15.94	6.7
Chr2	14894956	-	Chr2.noncapped.2825	snoRNA_5P	AT2G08725	tandem	cluster=4;position=1	13.31	4.41	2.41	1.22	3.29	0.62	8.58	4.27	1.48
Chr2	14895064	-	Chr2.noncapped.2825	snoRNA_TSS	AT2G08725|AT2G35387|AT2G35384|AT2G35382	tandem	cluster=4	1.24	1.36	4.14	1.8	5.57	2.06	1.13	2.1	1.25
Chr2	15027668	-	Chr2.noncapped.2865	snoRNA_5P	AT2G35742	tandem	cluster=3;position=3	0.76	0.57	1.17	0.16	0	0.17	1.93	0.39	0.62
Chr2	15028193	-	Chr2.capped.2866	snoRNA_TSS	AT2G08760|AT2G08755|AT2G35742	tandem	cluster=3	0.73	0.67	1.01	1.46	0.28	0.41	1.42	1.72	0.7
Chr2	15029652	-	Chr2.noncapped.2867	snoRNA_5P	AT2G08765	tandem	cluster=4;position=4	12.42	11.37	16.78	0.34	0.69	0	6.71	4.27	4.91
Chr2	15029790	-	Chr2.noncapped.2868	snoRNA_5P	AT2G35744	tandem	cluster=4;position=3	14.39	8.04	9.77	0.61	0.68	0.22	7.89	7.74	2.57
Chr2	15029911	-	Chr2.noncapped.2869	snoRNA_5P	AT2G35747	tandem	cluster=4;position=2	6.12	2.54	1.76	1.9	0.92	1.37	3.71	1.83	1.17
Chr2	15030190	-	Chr2.noncapped.2870	snoRNA_5P	AT2G08770	tandem	cluster=4;position=1	7.79	6.55	9.46	0.1	0.99	0.12	9.96	6.78	3.9
Chr2	15030318	-	Chr2.capped.2871	snoRNA_TSS	AT2G08770|AT2G35747|AT2G35744|AT2G08765	tandem	cluster=4	11.75	12.47	18.23	11.82	13.86	10.48	21.43	18.82	4.75
Chr2	15168556	+	Chr2.capped.2909	tRNA_TSS	AT2G36140	intron	host=AT2G36145;tRNA=asn_GTT	18.51	14.56	10.3	14.48	12.79	23.48	18.14	14.72	20.96
Chr2	15608829	+	Chr2.capped.3020	miRNA_TSS	AT2G08855	intron	host=AT2G37160;name=ath-miR1886	0.23	0.77	0.32	0.61	0.31	0.19	0.47	1.4	0.86
Chr2	15641941	+	Chr2.capped.3030	snoRNA_TSS	AT2G08860	UTR	host=AT2G37250	8.91	15.73	18.7	29.06	19.4	36.11	25.7	20.24	9.43
Chr2	15643644	+	Chr2.noncapped.3031	snoRNA_5P	AT2G08860	UTR	host=AT2G37250	0.72	1.3	1.53	0	0	0	1.65	1.32	0.7
Chr2	15890158	-	Chr2.noncapped.3099	snoRNA_5P	AT2G08900	tandem	cluster=3;position=3	22.21	4.21	3.42	0	1.63	0.05	4.6	5.99	5.85
Chr2	15890322	-	Chr2.noncapped.3100	snoRNA_5P	AT2G08905	tandem	cluster=3;position=2	13.16	1.61	0.66	0.44	1.91	0.22	4.3	1.8	0.93
Chr2	15890467	-	Chr2.capped.3101	snoRNA_5P	AT2G08910	tandem	cluster=3;position=1	4.87	1.24	1.93	0.5	0.84	0.52	2.23	1.82	1.02
Chr2	15890563	-	Chr2.capped.3101	snoRNA_TSS	AT2G08910|AT2G08905|AT2G08900	tandem	cluster=3	1.85	5.14	4.35	5.71	7.27	4.44	5.22	6.78	7.4
Chr2	16061877	+	Chr2.capped.3149	miRNA_TSS	AT2G38325	unit	name=ath-miR390a	0.7	0.22	0.09	2.68	6.5	3.35	1	1.2	0.23
Chr2	16339899	+	Chr2.capped.3243	miRNA_TSS	AT2G39175	unit	name=ath-miR160a	2.18	2.84	4.5	2.92	6.65	1.86	4.48	5.1	1.71
Chr2	16340341	+	Chr2.noncapped.3244	miRNA_3p5P	AT2G39175	unit	name=ath-miR160a	1.27	1.31	0.75	0	0	0	0.47	0.38	0.31
Chr2	16340362	+	Chr2.noncapped.3244	miRNA_3p3P	AT2G39175	unit	name=ath-miR160a	0.1	0.26	0	0	0	0	0	0	0.08
Chr2	17028537	+	Chr2.capped.3445	miRNA_TSS	AT2G40805	unit	name=ath-miR319c	0.23	0.1	0.21	0.19	0.63	0.2	0.11	0.65	1.17
Chr2	17355057	-	Chr2.capped.3556	miRNA_TSS	AT2G41616	intron	host=AT2G41620;name=ath-miR778	0.38	0.98	0.33	0.74	0.4	0.26	0.34	0.69	0.93
Chr2	17922052	+	Chr2.capped.3729	snoRNA_TSS	AT2G43137|AT2G43138|AT2G43139|AT2G43141	intron	cluster=4	2.34	2.19	2.74	3.45	4.3	2.52	5.28	4.54	5.3
Chr2	17923080	+	Chr2.noncapped.3730	snoRNA_5P	AT2G43137	intron	cluster=4;position=1	12.49	6.17	3.96	13.1	10.18	11.28	5.36	2.5	2.26
Chr2	17923237	+	Chr2.noncapped.3731	snoRNA_5P	AT2G43138	intron	cluster=4;position=2	7.85	2.2	1.38	1.89	0.93	0.69	1.13	0.75	0.31
Chr2	17923398	+	Chr2.noncapped.3732	snoRNA_5P	AT2G43139	intron	cluster=4;position=3	2.19	0.84	0.56	0.17	0.31	0	0.51	0.08	0.16
Chr2	17923562	+	Chr2.noncapped.3733	snoRNA_5P	AT2G43141	intron	cluster=4;position=4	65.2	17.76	7.54	2.77	1.21	0.48	9.38	4.53	6.86
Chr2	18018381	-	Chr2.noncapped.3763	snoRNA_5P	AT2G09465	tandem	cluster=2;position=1	2.17	1.71	1.85	0	0	0.16	2.94	1.91	1.48
Chr2	18018690	-	Chr2.capped.3764	snoRNA_TSS	AT2G09465|AT2G09460	tandem	cluster=2	3.24	3.17	6.95	0.61	2.54	1.36	2.01	1.83	0.7
Chr2	18309983	-	Chr2.capped.3867	tRNA_3P	AT2G44320	unit	tRNA=ser_GCT	0	0.1	0.07	0.17	0	0.41	0.27	0	0.16
Chr2	18973306	+	Chr2.capped.4087	snoRNA_TSS	AT2G09680|AT2G09685|AT2G09690|AT2G09695|AT2G09700|AT2G09705	tandem	cluster=6	3.86	1.32	2.1	2.83	1.04	0.88	3.21	3.7	3.35
Chr2	18973411	+	Chr2.noncapped.4088	snoRNA_5P	AT2G09685	tandem	cluster=6;position=2	4.96	3.33	3.69	0.61	0	0.16	4.08	3.57	1.56
Chr2	18973542	+	Chr2.noncapped.4089	snoRNA_5P	AT2G09690	tandem	cluster=6;position=3	6.61	2.62	1.8	0.1	0	0.64	3.63	2.61	0.47
Chr2	18973914	+	Chr2.noncapped.4090	snoRNA_5P	AT2G09700	tandem	cluster=6;position=5	16.85	9	11.95	0	2.97	0	5.59	4.95	2.42
Chr2	18974209	+	Chr2.noncapped.4091	snoRNA_5P	AT2G09705	tandem	cluster=6;position=6	3.98	2.28	1.17	0.23	0	0.24	3.15	1.34	1.14
Chr2	19176261	+	Chr2.noncapped.4163	miRNA_3p3P	AT2G46685	unit	name=ath-miR166a	2.24	1.69	1.34	0	0	0	0.73	1.8	0.23
Chr2	19319779	+	Chr2.capped.4204	miRNA_TSS	AT2G47015	unit	name=ath-miR408	1.36	3.19	3.54	2.13	4.71	0.58	0.25	1.36	0.39
Chr2	19319932	+	Chr2.noncapped.4205	miRNA_3p5P	AT2G47015	unit	name=ath-miR408	0.08	0.17	0.16	0.19	0	0	0	0	0
Chr2	19319953	+	Chr2.noncapped.4205	miRNA_3p3P	AT2G47015	unit	name=ath-miR408	0.57	1.14	1.79	0	0	0	0	0.68	0.39
Chr2	19366686	+	Chr2.capped.4219	snoRNA_TSS	AT2G09815	intron	host=AT2G47170	18.4	22.49	27.07	42.69	17.08	74.32	92.74	71.65	118.27
Chr2	19414976	+	Chr2.capped.4235	miRNA_TSS	AT2G47275	unit	name=ath-miR403	0	0.3	0	0	0	0.43	0	0.22	0.08
Chr3	104769	-	Chr3.noncapped.38	snoRNA_5P	AT3G01313	tandem	cluster=3;position=3	67.32	19.17	6.35	55.11	33.8	32.32	49.56	27.43	8.18
Chr3	104909	-	Chr3.noncapped.39	snoRNA_5P	AT3G01316	tandem	cluster=3;position=2	11.63	3.64	2.4	0	0.68	0.09	9.2	4.06	3.35
Chr3	105053	-	Chr3.noncapped.40	snoRNA_5P	AT3G00985	tandem	cluster=3;position=1	11.16	2.48	2.14	1.88	2.88	0.3	1.28	1.55	0.86
Chr3	105183	-	Chr3.capped.41	snoRNA_TSS	AT3G00985|AT3G01316|AT3G01313	tandem	cluster=3	2.57	3.68	3.68	1.9	6.44	2.96	1.01	0.52	0.08
Chr3	258878	+	Chr3.capped.97	tRNA_TSS	AT3G01705	UTR	host=AT3G01700;tRNA=pro_AGG	108.09	221.67	190.43	44.19	172.02	143.64	23.11	244.16	51.66
Chr3	616416	+	Chr3.capped.238	snoRNA_TSS	AT3G01145|AT3G01155	tandem	cluster=2	0.7	1.19	2.21	1.86	2.44	0.54	1.34	1.83	1.17
Chr3	616492	+	Chr3.capped.238	snoRNA_5P	AT3G01145	tandem	cluster=2;position=1	1.24	1.44	1.37	0.69	0.27	0.59	0.75	0.71	1.17
Chr3	616751	+	Chr3.noncapped.239	snoRNA_5P	AT3G01155	tandem	cluster=2;position=2	1.73	1.15	1.66	0	0	0	1.12	0.16	0.08
Chr3	1657759	+	Chr3.noncapped.579	snRNA_5P	AT3G01695	unit	snRNA=U1	0.22	0.2	0.27	1.18	0	0.33	0.22	0.48	0.06
Chr3	1681808	+	Chr3.noncapped.587	snRNA_5P	AT3G01715	unit	snRNA=U1	0.22	0.2	0.27	1.18	0	0.33	0.22	0.48	0.06
Chr3	2178336	-	Chr3.noncapped.752	snRNA_5P	AT3G06900	unit	snRNA=U4	0.89	0.09	0.14	0	1.12	0.85	0.29	0.7	0.08
Chr3	2507882	+	Chr3.capped.878	snoRNA_TSS	AT3G02045	intron	host=AT3G07860	1.08	1.54	1.92	3.54	1.15	1.25	1.24	0.33	1.4
Chr3	2905723	-	Chr3.capped.999	snoRNA_TSS	AT3G02205	intron	host=AT3G09440	18.33	15.6	21.81	21.84	23.81	34.06	92.24	67.5	146.47
Chr3	3366463	-	Chr3.capped.1148	miRNA_TSS	AT3G10745	unit	name=ath-miR158a	0.4	0.28	0.27	0.4	1.34	0.84	0.28	1	0.62
Chr3	3573418	+	Chr3.capped.1211	tRNA_TSS	AT3G11395	intron	host=AT3G11402;tRNA=val_CAC	0.82	1.08	0.46	1.24	0	2.58	0.6	1.7	0.16
Chr3	3575843	+	Chr3.capped.1212	tRNA_5P	AT3G11395	intron	host=AT3G11402;tRNA=val_CAC	0.19	0.09	0	0.17	0.99	0	0	0	0
Chr3	3578467	+	Chr3.capped.1213	snoRNA_TSS	AT3G02385	intron	host=AT3G11400	10.94	19.88	15.71	55.88	21.37	8.04	37.96	29.35	41.76
Chr3	3579157	+	Chr3.noncapped.1214	snoRNA_5P	AT3G02385	intron	host=AT3G11400	0.22	0.39	0.57	0	0.46	0	0.25	0.1	0.16
Chr3	3628098	-	Chr3.noncapped.1235	snoRNA_5P	AT3G02435	tandem	cluster=2;position=2	2.89	4.91	5.62	0	0.35	0.45	2.97	3.89	1.02
Chr3	3628218	-	Chr3.noncapped.1236	snoRNA_5P	AT3G02445	tandem	cluster=2;position=1	54.93	23.94	12.15	1.74	2.22	0.98	16.56	11.08	11.76
Chr3	3628373	-	Chr3.capped.1237	snoRNA_TSS	AT3G02445|AT3G02435	tandem	cluster=2	2.92	1.46	4.13	3.89	6.24	3.24	1.41	1.93	0.86
Chr3	3995529	-	Chr3.capped.1360	tRNA_TSS	AT3G12585	intron	host=AT3G12587;tRNA=arg_CCG	21.72	23.39	25.97	23.89	21.43	12.51	24.31	22.32	24.62
Chr3	4411085	+	Chr3.capped.1487	snoRNA_TSS	AT3G13525|AT3G02725	tandem	cluster=2	2.47	0.94	1.22	3.45	4.31	2.43	1.81	1.09	1.01
Chr3	4411166	+	Chr3.capped.1487	snoRNA_5P	AT3G13525	tandem	cluster=2;position=1	5.48	1.29	0.97	0.44	1.48	0.14	1.32	1.76	0.7
Chr3	4411289	+	Chr3.noncapped.1488	snoRNA_5P	AT3G02725	tandem	cluster=2;position=2	1.84	0.31	0.61	0.29	0.37	0	0.65	0.29	0
Chr3	4561103	+	Chr3.noncapped.1537	snRNA_5P	AT3G13855	unit	snRNA=U6	29.67	10.51	7.88	20.56	58.82	33.83	19.29	13.94	11.07
Chr3	4594918	-	Chr3.capped.1547	snoRNA_TSS	AT3G02795	intron	host=AT3G13920	42.27	44.02	47.05	31.2	37.81	26.4	31.87	33.85	10.68
Chr3	4951588	+	Chr3.noncapped.1656	snRNA_5P	AT3G14735	unit	snRNA=U6	27.65	29.1	4.33	7.69	33.89	16.51	17.2	43.38	9.25
Chr3	5387113	+	Chr3.capped.1791	snoRNA_TSS	AT3G03175	unit		1.17	0.71	0.3	1.4	1.97	1.14	0.45	0	0.08
Chr3	5387182	+	Chr3.capped.1791	snoRNA_5P	AT3G03175	unit		2.19	0.66	0.39	0	0	0	0.84	0.16	0
Chr3	5500099	+	Chr3.capped.1823	miRNA_TSS	AT3G03255	sense	host=AT3G16230;name=ath-miR782	0	0.06	0.19	0	0	0.12	0	0.21	0.08
Chr3	5830094	-	Chr3.noncapped.1913	snoRNA_5P	AT3G03415	tandem	cluster=3;position=3	5.81	3.18	1.87	0.03	0	0	1.99	2.13	0.16
Chr3	5830240	-	Chr3.noncapped.1914	snoRNA_5P	AT3G03425	tandem	cluster=3;position=2	5.46	1.08	0.7	0.22	0	0	1.02	1.53	1.02
Chr3	5830436	-	Chr3.capped.1915	snoRNA_5P	AT3G03445	tandem	cluster=3;position=1	0.56	0.48	0.28	0	0	0	0.79	0.3	0.62
Chr3	5830523	-	Chr3.capped.1915	snoRNA_TSS	AT3G03445|AT3G03425|AT3G03415	tandem	cluster=3	2.17	1.56	2.17	1.61	3.39	1.18	0.92	1.31	0.16
Chr3	6128035	-	Chr3.noncapped.2002	snoRNA_5P	AT3G03585	unit		9.92	5.54	6.46	0	0	0.45	4.96	3.28	2.88
Chr3	6128126	-	Chr3.noncapped.2002	snoRNA_TSS	AT3G03585	unit		0.35	0.4	0.45	0.17	0	0.91	0	0.25	0
Chr3	6214931	+	Chr3.capped.2037	miRNA_TSS	AT3G03625	sense	host=AT3G18145;name=ath-miR3440b	0.05	0.21	0.45	0	0.45	0.47	0.14	0.1	0
Chr3	6484012	-	Chr3.noncapped.2115	tRNA_5P	AT3G18815	unit	tRNA=thr_AGT	0.2	0	0	0.63	0	0.54	0.14	0	0
Chr3	6484017	-	Chr3.noncapped.2115	tRNA_TSS	AT3G18815	unit	tRNA=thr_AGT	0.59	0	0.15	0.42	0	0.38	0.4	0	0
Chr3	7682267	+	Chr3.noncapped.2448	snoRNA_TSS	AT3G21805|AT3G04155|AT3G04165|AT3G04175	tandem	cluster=4	2.12	0.53	1.09	1.02	0.25	0.18	0.93	1	1.01
Chr3	7682361	+	Chr3.noncapped.2448	snoRNA_5P	AT3G21805	tandem	cluster=4;position=1	29.04	8.07	4.31	0.14	0	0.13	21.09	13.39	5.92
Chr3	7682507	+	Chr3.noncapped.2449	snoRNA_5P	AT3G04155	tandem	cluster=4;position=2	17.7	12.26	8.18	0.32	0.72	1.3	17.47	15.59	6.7
Chr3	7682637	+	Chr3.noncapped.2450	snoRNA_5P	AT3G04165	tandem	cluster=4;position=3	5.49	2.91	2.28	0	0	0	5.16	1.73	0.24
Chr3	7682804	+	Chr3.noncapped.2451	snoRNA_5P	AT3G04175	tandem	cluster=4;position=4	23.55	4.57	2.33	0.74	0	0.88	7.13	2.42	1.33
Chr3	8108021	+	Chr3.capped.2569	miRNA_TSS	AT3G22886	unit	name=ath-miR167a	0.4	0.88	1.26	1.22	0.82	1.18	1.29	2.28	2.57
Chr3	8345772	+	Chr3.capped.2614	miRNA_TSS	AT3G23326	intron	host=AT3G23325;name=ath-miR853	10.37	18.32	20.38	36.52	24.62	34.31	45.12	39.91	26.56
Chr3	8979152	-	Chr3.noncapped.2751	snoRNA_5P	AT3G24612	tandem	cluster=3;position=3	10.4	4.5	4.16	0	0	0.05	2.51	4.79	1.01
Chr3	8979461	-	Chr3.noncapped.2753	snoRNA_5P	AT3G24614	tandem	cluster=3;position=2	9.8	3.74	2.33	0.52	2.48	0.31	7.09	6.68	6.29
Chr3	8979603	-	Chr3.noncapped.2754	snoRNA_5P	AT3G24615	tandem	cluster=3;position=1	33.27	11.55	4.61	4.32	16.17	4.94	14.41	3.6	4.51
Chr3	8979712	-	Chr3.noncapped.2754	snoRNA_TSS	AT3G24615|AT3G24614|AT3G24612	tandem	cluster=3	0.72	0.68	0.6	0.27	1.39	0.32	0.73	0.36	0.78
Chr3	9550592	+	Chr3.capped.2895	snoRNA_TSS	AT3G04985	unit		0.44	0.36	0.93	1	1.03	0.98	1.02	0.42	0.47
Chr3	9550928	+	Chr3.noncapped.2897	snoRNA_5P	AT3G04985	unit		0.52	0.64	0.13	0	0	0.06	0	0.83	0.04
Chr3	9880518	+	Chr3.capped.2983	snRNA_5P	AT3G05115	sense	host=AT3G26820;snRNA=U2	0.19	0.45	0.25	0.04	0.61	2.39	0.78	0.49	0.16
Chr3	10328410	+	Chr3.capped.3108	snoRNA_TSS	AT3G27865|AT3G05325|AT3G05335|AT3G05355	tandem	cluster=4	3.9	4.19	6.99	7.47	8.12	8.91	5.18	4.49	4.21
Chr3	10328508	+	Chr3.capped.3108	snoRNA_5P	AT3G27865	tandem	cluster=4;position=1	2.85	0.33	0.38	0.35	0.99	0	1.43	1.06	0.31
Chr3	10328658	+	Chr3.noncapped.3109	snoRNA_5P	AT3G05325	tandem	cluster=4;position=2	1.84	1.02	1.82	0.45	0.42	0.65	0.67	0.79	0.45
Chr3	10328979	+	Chr3.noncapped.3110	snoRNA_5P	AT3G05335	tandem	cluster=4;position=3	7.25	3.61	3.35	0.22	0.35	0.21	7.51	3.61	3.66
Chr3	10329133	+	Chr3.noncapped.3111	snoRNA_5P	AT3G05355	tandem	cluster=4;position=4	16.4	7.23	7.57	0	0	0	4.71	3.25	1.97
Chr3	11154153	+	Chr3.capped.3279	snoRNA_TSS	AT3G05715	unit		4.94	3.25	4.62	7.36	6.19	4.29	4.39	3.54	0.39
Chr3	14197115	+	Chr3.noncapped.3382	miRNA_3p5P	AT3G06345	unit	name=ath-miR5642a	231.73	0	147.53	2.74	9.91	5.22	57.15	0	8.02
Chr3	16790815	+	Chr3.capped.3603	snRNA_5P	AT3G07265	sense	host=AT3G45740;snRNA=U6	2.56	2.72	1.56	2.45	2.96	4.71	3.21	4.62	6.31
Chr3	17445018	+	Chr3.capped.3727	snoRNA_TSS	AT3G07715|AT3G47342|AT3G07725|AT3G07735|AT3G47347|AT3G47348	tandem	cluster=6	5.31	14.85	12.91	19.78	10.73	40.13	18.85	18.26	8.02
Chr3	17445155	+	Chr3.noncapped.3728	snoRNA_5P	AT3G07715	tandem	cluster=6;position=1	2.25	2.25	2.07	0.2	0	1.1	2.9	2.95	0.55
Chr3	17445381	+	Chr3.noncapped.3729	snoRNA_5P	AT3G47342	tandem	cluster=6;position=2	9.82	4.92	3.88	0	0.42	0	1.63	3.98	0.93
Chr3	17445497	+	Chr3.noncapped.3730	snoRNA_5P	AT3G07725	tandem	cluster=6;position=3	5.72	5.11	4.3	2.97	1.41	1.18	2.83	2.8	3.43
Chr3	17445687	+	Chr3.noncapped.3731	snoRNA_5P	AT3G07735	tandem	cluster=6;position=4	57	15.43	9.1	0	0.87	0	23.44	17.62	3.35
Chr3	17445808	+	Chr3.noncapped.3732	snoRNA_5P	AT3G47347	tandem	cluster=6;position=5	16.64	13.72	20.24	1.49	12.27	4.98	8.85	9.81	3.12
Chr3	17445962	+	Chr3.noncapped.3733	snoRNA_5P	AT3G47348	tandem	cluster=6;position=6	24.82	21.16	25.54	0.67	0.99	0.09	30.28	20.43	5.61
Chr3	18826039	+	Chr3.noncapped.4059	tRNA_5P	AT3G50665	unit	tRNA=glu_TTC	0.71	0	0	0.21	1.22	0.41	0	0	0
Chr3	18893303	-	Chr3.noncapped.4076	snoRNA_5P	AT3G08165	tandem	cluster=2;position=2	27.92	5.3	7.04	5.57	7.3	3.06	7.56	6.51	0.55
Chr3	18893484	-	Chr3.noncapped.4077	snoRNA_5P	AT3G50825	tandem	cluster=2;position=1	20.67	19.36	27.8	0.88	0.91	0.47	11.93	8.09	5.34
Chr3	18893642	-	Chr3.capped.4078	snoRNA_TSS	AT3G50825|AT3G08165	tandem	cluster=2	8.33	8.08	7.01	13.22	8.89	9.72	13.43	11.79	7.56
Chr3	19073359	+	Chr3.capped.4135	miRNA_TSS	AT3G51375	unit	name=ath-miR171a	0.08	0.07	0.36	0.43	0	0	0.15	0.83	0.08
Chr3	19212696	-	Chr3.noncapped.4182	snoRNA_5P	AT3G08210	intron	host=AT3G51800	3.89	2.57	1.52	0.92	0.91	0.1	1.94	1.43	1.01
Chr3	19213646	-	Chr3.capped.4183	snoRNA_TSS	AT3G08210	intron	host=AT3G51800	18.56	20.72	21.34	16.11	21.58	13.04	22.38	15.89	7.17
Chr3	19500986	+	Chr3.capped.4269	tRNA_TSS	AT3G52565	UTR	host=AT3G52570;tRNA=leu_TAG	0.28	0.09	0.01	0.23	0.08	0.93	0	0.05	0
Chr3	19505641	+	Chr3.capped.4272	snoRNA_TSS	AT3G08275	intron	host=AT3G52590	397.08	337.02	349.13	572.28	376.41	816.14	932.84	477.77	820.15
Chr3	19506226	+	Chr3.noncapped.4273	snoRNA_5P	AT3G08275	intron	host=AT3G52590	2.57	1.36	1.94	0	0.65	1.18	0.9	1.86	0.23
Chr3	20571429	+	Chr3.capped.4601	snoRNA_TSS	AT3G08485	unit		0.59	0.4	0.63	0.08	0.77	0.07	0.35	0.58	0
Chr3	20571518	+	Chr3.capped.4601	snoRNA_5P	AT3G08485	unit		15.41	4.34	1.98	6.93	6.43	9.17	3.95	2.11	3.59
Chr3	20691572	+	Chr3.capped.4624	miRNA_TSS	AT3G55734	unit	name=ath-miR393b	0.06	0.15	0.08	0.18	0.19	0.1	0.22	0.06	0
Chr3	20691798	+	Chr3.capped.4624	miRNA_3p3P	AT3G55734	unit	name=ath-miR393b	0.76	0.52	0.72	0	0	0	0.56	0.45	0.16
Chr3	21004492	+	Chr3.noncapped.4725	snRNA_5P	AT3G56705	unit	snRNA=U2	0	0	0	6.99	11.54	0	1.27	0	0.19
Chr3	21015473	+	Chr3.capped.4730	snRNA_5P	AT3G08695	sense	host=AT3G56740;snRNA=U2	1.42	1.59	1.01	1.41	1.87	2.49	4.98	4.24	7.95
Chr3	21042014	-	Chr3.noncapped.4739	snRNA_5P	AT3G56825	unit	snRNA=U2	12.21	12.7	20.17	13.86	0	6.63	0	14.2	3.32
Chr3	21353533	+	Chr3.capped.4844	snRNA_5P	AT3G08945	sense	host=AT3G57660;snRNA=U2	1.57	0.39	0.55	2.21	21.11	5.58	1.15	0.43	0.46
Chr3	21397617	-	Chr3.noncapped.4856	snRNA_5P	AT3G57765	unit	snRNA=U2	0	10.94	0.82	0	0	2.58	15.88	17.84	3.2
Chr3	21559059	+	Chr3.noncapped.4904	snoRNA_5P	AT3G58193	tandem	cluster=2;position=1	8.33	3.91	2.13	1.01	0	0.12	2.59	2.64	1.01
Chr3	21559243	+	Chr3.noncapped.4905	snoRNA_5P	AT3G58196	tandem	cluster=2;position=2	9.76	2.22	1.21	0	0	0	4.06	1.52	0.31
Chr3	22054881	-	Chr3.noncapped.5033	snoRNA_5P	AT3G09225	unit		2.13	1.22	0.62	0.98	2.04	0.27	2.4	1.44	0.39
Chr3	22054997	-	Chr3.capped.5034	snoRNA_TSS	AT3G09225	unit		10.9	4.47	2.07	8.31	8.57	8.9	5.64	3.17	1.01
Chr3	22535721	+	Chr3.capped.5168	miRNA_TSS	AT3G09515	intron	host=AT3G60960;name=ath-miR1888b	2.28	0.8	2.86	1.66	1.79	0.38	0.47	1.56	0.16
Chr3	22922001	+	Chr3.capped.5285	miRNA_TSS	AT3G61897	unit	name=ath-miR166b	0.11	0.23	0.15	0.2	0.54	1.1	0.27	0.16	0.16
Chr3	22922321	+	Chr3.noncapped.5286	miRNA_3p3P	AT3G61897	unit	name=ath-miR166b	2.36	2.32	1.78	0	0	0	2.93	2.84	0.7
Chr3	23181845	-	Chr3.noncapped.5376	snoRNA_5P	AT3G09865	unit		0.99	0.92	0.31	0.26	0	0.05	1.48	0.62	0.24
Chr3	23182056	-	Chr3.capped.5377	snoRNA_TSS	AT3G09865	unit		2.08	2.5	1.24	4.51	3.86	2.93	2.83	1.59	1.71
Chr4	424787	-	Chr4.capped.116	tRNA_TSS	AT4G00985	UTR	host=AT4G00980;tRNA=gln_CTG	0	0.03	0	0.02	0	0.08	0.14	0	0
Chr4	687584	+	Chr4.noncapped.180	snoRNA_TSS	AT4G03915|AT4G03925	tandem	cluster=2	0.69	1.16	2.11	4.11	1.67	2.2	1.68	1.21	1.4
Chr4	687659	+	Chr4.noncapped.180	snoRNA_5P	AT4G03915	tandem	cluster=2;position=1	25.59	11.68	5.74	0	0.81	0.4	12.4	6.72	8.03
Chr4	687897	+	Chr4.noncapped.181	snoRNA_5P	AT4G03925	tandem	cluster=2;position=2	0.42	0.23	0.27	0	0	0	0.32	0.32	0
Chr4	1046993	-	Chr4.capped.266	miRNA_TSS	AT4G04125	sense	host=AT4G02380;name=ath-miR2936	62.92	206.51	138.61	53.88	137.55	160.8	29.24	142.62	26.88
Chr4	1114627	-	Chr4.capped.286	snRNA_5P	AT4G04185	unit	snRNA=U5	0.1	0.15	0.17	0.47	0.29	0.13	0.08	0.17	0
Chr4	1122428	+	Chr4.capped.289	snoRNA_TSS	AT4G02555|AT4G04205	tandem	cluster=2	0.23	0.14	0.62	0.18	0.3	0.56	0.17	0.16	0.47
Chr4	1122601	+	Chr4.noncapped.290	snoRNA_5P	AT4G02555	tandem	cluster=2;position=1	40.5	12.01	3.99	17.49	10.94	13.74	19.52	16.36	3.04
Chr4	1122773	+	Chr4.noncapped.291	snoRNA_5P	AT4G04205	tandem	cluster=2;position=2	121.49	27.75	8.38	1.02	2.67	0.57	42.27	22.93	9.2
Chr4	1445846	-	Chr4.noncapped.367	snoRNA_5P	AT4G04465	tandem	cluster=4;position=4	1.61	0.96	0.7	0.47	0.45	0.16	0.39	0.51	0.32
Chr4	1445953	-	Chr4.noncapped.368	snoRNA_5P	AT4G03295	tandem	cluster=4;position=3	436.6	77.89	34.57	318	947.76	215.87	191.97	110.7	100.27
Chr4	1446085	-	Chr4.noncapped.369	snoRNA_5P	AT4G04475	tandem	cluster=4;position=2	7.31	3.08	1.39	0.43	0	0.48	4.74	1.89	1.79
Chr4	1446258	-	Chr4.capped.370	snoRNA_5P	AT4G04485	tandem	cluster=4;position=1	0.62	0.06	0.1	0.23	0	0	0.71	0.42	0.16
Chr4	1446344	-	Chr4.capped.370	snoRNA_TSS	AT4G04485|AT4G04475|AT4G03295|AT4G04465	tandem	cluster=4	1.17	2.03	1.55	1.88	0.31	2.68	0.98	1.48	1.48
Chr4	1483121	-	Chr4.noncapped.377	snRNA_5P	AT4G04615	unit	snRNA=U6	15.23	0	4.56	98.33	61.26	33.58	19.52	0	9.09
Chr4	1529148	-	Chr4.capped.387	miRNA_TSS	AT4G03445	unit	name=ath-miR447a	0	0.25	0.04	0	0	0	0.32	0.1	0
Chr4	1535840	-	Chr4.capped.388	miRNA_TSS	AT4G03455	unit	name=ath-miR447b	0.48	0.06	0.24	0.42	0	0.2	0.19	0.08	0
Chr4	2625916	+	Chr4.capped.504	miRNA_TSS	AT4G05105	unit	name=ath-miR397a	0.09	0.49	0.32	0.24	0	0.17	0	0	0
Chr4	7163381	-	Chr4.capped.896	miRNA_TSS	AT4G05930	intron	host=AT4G17792;name=ath-miR8179	1.63	1.03	0.51	1.31	3.18	1.3	3.08	3.42	1.87
Chr4	7683684	+	Chr4.capped.1014	snoRNA_TSS	AT4G06010|AT4G06015|AT4G13245	tandem	cluster=3	0.55	0.88	0.85	0.8	0.19	1.79	0.24	0.45	0.78
Chr4	7683787	+	Chr4.noncapped.1015	snoRNA_5P	AT4G06010	tandem	cluster=3;position=1	1.72	0.38	0.45	0.09	0.39	0.36	0.14	0.2	0.17
Chr4	7683936	+	Chr4.noncapped.1016	snoRNA_5P	AT4G06015	tandem	cluster=3;position=2	12.14	5.03	2.17	8.86	8.5	11.91	8.11	5.9	7.41
Chr4	7842968	+	Chr4.capped.1050	miRNA_TSS	AT4G06075	intron	host=AT4G13495;cluster=3;position=1;name=ath-miR5026	1.6	1.42	1.77	1.66	2.42	2.34	1.53	0.98	1.01
Chr4	7878798	-	Chr4.capped.1058	miRNA_TSS	AT4G13554|AT4G13555	tandem	cluster=2	0.35	0.64	0.34	0.44	0.35	0.11	0	0	0
Chr4	8334267	+	Chr4.capped.1172	miRNA_TSS	AT4G14504	intron	host=AT4G14500;name=ath-miR852	5.58	4.82	3.92	2.95	4.86	6.46	14.51	13.89	20.18
Chr4	8459566	+	Chr4.capped.1208	snoRNA_TSS	AT4G06240|AT4G06245|AT4G06250|AT4G06255	tandem	cluster=4	1.09	0.66	0.8	1.44	1.84	0.57	1.04	0.82	0.93
Chr4	8459710	+	Chr4.noncapped.1209	snoRNA_5P	AT4G06240	tandem	cluster=4;position=1	0	0	0	0	0	0.22	7.41	4.45	2.69
Chr4	8459902	+	Chr4.noncapped.1210	snoRNA_5P	AT4G06245	tandem	cluster=4;position=2	8.57	5.94	4.07	1.37	1.23	0.31	5.53	9.1	1.87
Chr4	8460055	+	Chr4.noncapped.1211	snoRNA_5P	AT4G06250	tandem	cluster=4;position=3	1.52	0.98	1.32	0	0	0	1.09	0.82	0.24
Chr4	8504502	-	Chr4.capped.1224	miRNA_TSS	AT4G14811	unit	name=ath-miR780	0.76	2.23	2.2	0.46	6.72	2.43	4.82	5.22	3.19
Chr4	8712660	-	Chr4.noncapped.1283	snoRNA_5P	AT4G06305	tandem	cluster=5;position=5	0.46	0.33	0.11	0	0	0	0.95	0.69	0.16
Chr4	8712812	-	Chr4.noncapped.1283	snoRNA_5P	AT4G06310	tandem	cluster=5;position=4	1.57	0.8	1.16	0.07	0	0	2.29	0.86	0.93
Chr4	8712964	-	Chr4.noncapped.1284	snoRNA_5P	AT4G06315	tandem	cluster=5;position=3	6.33	3.21	3.17	0.22	0	0.11	4.71	4.34	2.73
Chr4	8713141	-	Chr4.noncapped.1285	snoRNA_5P	AT4G06320	tandem	cluster=5;position=2	8.04	4.64	2.44	1.69	0.88	0.42	5.21	4.35	3.35
Chr4	8713333	-	Chr4.noncapped.1286	snoRNA_5P	AT4G15258	tandem	cluster=5;position=1	35.82	13.05	7.87	0	0	0	6.09	6.58	2.73
Chr4	8713497	-	Chr4.capped.1287	snoRNA_TSS	AT4G15258|AT4G06320|AT4G06315|AT4G06310|AT4G06305	tandem	cluster=5	1	0.78	1.31	2.45	0.79	0.78	1.13	0.92	0.93
Chr4	9191575	+	Chr4.capped.1413	tRNA_5P	AT4G16235	unit	tRNA=val_TAC	0.5	0.07	0.06	0.5	0.39	0.37	0.25	0.16	0.23
Chr4	9287203	+	Chr4.noncapped.1447	tRNA_TSS	AT4G16465	unit	tRNA=thr_AGT	0.4	0.56	0.12	0.38	0.4	0	3.88	1.51	0.31
Chr4	9287208	+	Chr4.noncapped.1447	tRNA_5P	AT4G16465	unit	tRNA=thr_AGT	0.15	0.15	0.06	0.15	0.39	0.9	0.06	0	0
Chr4	9715194	-	Chr4.noncapped.1560	snoRNA_5P	AT4G06705	intron	host=AT4G17390	3.24	3.13	3	0.1	0	0	3.26	2.95	0.31
Chr4	9715567	-	Chr4.capped.1561	snoRNA_TSS	AT4G06705	intron	host=AT4G17390	206.03	236.06	196.24	257	271.49	219.68	486.68	344.98	900.09
Chr4	10578496	+	Chr4.capped.1780	miRNA_TSS	AT4G19395	unit	name=ath-miR168a	0.23	0.34	0.46	1.41	0.92	0.12	0.13	0.69	0.94
Chr4	10578757	+	Chr4.noncapped.1781	miRNA_3p3P	AT4G19395	unit	name=ath-miR168a	1.71	1.68	0.46	0.14	0	0	2.56	2	2.42
Chr4	10711917	-	Chr4.capped.1824	miRNA_TSS	AT4G06915	unit	name=ath-mIR4240	0	0.05	0	0.35	0.41	0.07	0.48	0.58	0.23
Chr4	11795019	+	Chr4.capped.2083	snoRNA_TSS	AT4G07075	unit		2.79	1.27	1.65	0.82	2.17	1.72	2.88	0.36	0.78
Chr4	11795019	+	Chr4.capped.2083	miRNA_TSS	AT4G07080	sense	host=AT4G07075;name=ath-miR8176	2.79	1.27	1.65	0.82	2.17	1.72	2.88	0.36	0.78
Chr4	11795100	+	Chr4.noncapped.2084	snoRNA_5P	AT4G07075	unit		8.35	2.77	2.12	0.4	0.85	0.49	2.42	2.55	6
Chr4	12352489	+	Chr4.capped.2218	miRNA_TSS	AT4G23713	unit	name=ath-miR319a	0.1	0.24	0.54	0.68	0.56	0	0.06	0	0
Chr4	12623535	+	Chr4.capped.2303	miRNA_TSS	AT4G24415	unit	name=ath-miR824	1.12	0.82	0.59	1.9	0.71	0.38	0.61	0.25	0.47
Chr4	12625741	+	Chr4.noncapped.2304	miRNA_3p3P	AT4G24415	unit	name=ath-miR824	2.84	1.12	0.76	0	0	0	1.23	0.86	0.55
Chr4	13074168	+	Chr4.capped.2429	snoRNA_TSS	AT4G25631	intron	host=AT4G25630	23.55	18.37	23.64	27.79	11.45	11.78	19.02	15.21	25.4
Chr4	13075564	+	Chr4.noncapped.2430	snoRNA_5P	AT4G25631	intron	host=AT4G25630	15.93	3.62	2.09	0	0	0.71	6.66	5.59	2.88
Chr4	13332964	-	Chr4.noncapped.2512	snoRNA_5P	AT4G26365	tandem	cluster=3;position=3	4.67	2.93	1.1	3.86	6.06	4.85	5.4	2.84	3.19
Chr4	13333103	-	Chr4.noncapped.2513	snoRNA_5P	AT4G07625	tandem	cluster=3;position=2	23.65	10.94	4.57	0.08	0	0.06	31.15	10.59	3.97
Chr4	13333284	-	Chr4.noncapped.2514	snoRNA_5P	AT4G07635	tandem	cluster=3;position=1	2.74	0.9	0.42	0	0	0	4.48	4.24	0.55
Chr4	13333494	-	Chr4.capped.2515	snoRNA_TSS	AT4G07635|AT4G07625|AT4G26365	tandem	cluster=3	0.99	1.82	1.66	1.98	0.94	1.89	1.56	0.94	0.23
Chr4	13341565	-	Chr4.noncapped.2519	tRNA_5P	AT4G26385	unit	tRNA=ile_AAT	0.73	0.85	0.13	0.24	0	0	0.54	0.53	0
Chr4	13341570	-	Chr4.noncapped.2519	tRNA_TSS	AT4G26385	unit	tRNA=ile_AAT	0.47	0.07	0	0	0	0	0.07	0.09	0
Chr4	13782208	+	Chr4.noncapped.2664	snRNA_5P	AT4G07875	unit	snRNA=U6	33.64	0	5.25	11.51	53.19	27.69	17.57	0	9.25
Chr4	14468741	-	Chr4.noncapped.2875	snoRNA_5P	AT4G08125	intron	host=AT4G29410;cluster=4;position=4	4.11	1.94	0.78	0.1	0.2	0.03	2.27	1.97	0.32
Chr4	14468905	-	Chr4.capped.2876	snoRNA_5P	AT4G08155	intron	host=AT4G29410;cluster=4;position=3	3.23	1.74	1.21	0.01	0	0	2.84	1.2	1.42
Chr4	14469056	-	Chr4.noncapped.2877	snoRNA_5P	AT4G08165	intron	host=AT4G29410;cluster=4;position=2	7.18	3.02	3.2	0.01	0.33	0	4.37	2.57	1.81
Chr4	14469284	-	Chr4.noncapped.2878	snoRNA_5P	AT4G08175	intron	host=AT4G29410;cluster=4;position=1	4.71	2.26	1.3	0.02	0	0.31	2.3	1.86	2.09
Chr4	14470161	-	Chr4.capped.2879	snoRNA_TSS	AT4G08175|AT4G08165|AT4G08155|AT4G08125	intron	host=AT4G29410;cluster=4	123.23	173.16	185.46	136.13	183.29	96.7	192.56	172.35	102.22
Chr4	14605795	-	Chr4.capped.2922	snoRNA_TSS	AT4G08235	UTR	host=AT4G29860	0.21	0.75	0.22	0.34	0	0.25	0.46	0.34	0.7
Chr4	14960355	-	Chr4.capped.3024	snoRNA_TSS	AT4G08325	intron	host=AT4G30680	0.55	1.51	1.66	0.85	1.34	0.61	0.9	0.68	0.78
Chr4	15100095	+	Chr4.capped.3063	snoRNA_TSS	AT4G08425	UTR	host=AT4G30993	5.85	8.2	7.25	43.42	17.2	9.6	3.35	1.93	2.73
Chr4	15345793	-	Chr4.noncapped.3136	tRNA_TSS	AT4G31695	unit	tRNA=met_CAT	0	0	0	0.53	0.58	0	0	0	0
Chr4	15466620	+	Chr4.capped.3166	snoRNA_TSS	AT4G08615|AT4G08625	tandem	cluster=2	3.81	1.9	2.13	5	1.73	4.15	2.52	3.54	0.55
Chr4	15466893	+	Chr4.noncapped.3167	snoRNA_5P	AT4G08615	tandem	cluster=2;position=1	7.65	2.46	1.66	7.79	8.25	2.79	1.48	1.34	0.78
Chr4	15467094	+	Chr4.noncapped.3168	snoRNA_5P	AT4G08625	tandem	cluster=2;position=2	45.92	8.61	8.34	26.24	83.01	31.27	13.35	10.79	8.1
Chr4	15965254	-	Chr4.noncapped.3310	snRNA_5P	AT4G08755	unit	snRNA=U6	64.76	36.47	17.75	91.02	96.94	69.89	66.8	50.25	30.18
Chr4	16454775	-	Chr4.capped.3478	tRNA_TSS	AT4G34415	UTR	host=AT4G34412;tRNA=arg_CCT	0.19	0	0	0.1	0	0	0	0	0
Chr4	16754830	+	Chr4.noncapped.3579	snRNA_5P	AT4G09135	unit	snRNA=U6	15.96	5.1	3.13	12.2	28.58	15.5	10.49	8.48	5.62
Chr4	17276773	-	Chr4.noncapped.3747	tRNA_5P	AT4G36635	unit	tRNA=ile_TAT	0	0	0	0.59	0.35	0	0	0.26	0
Chr4	17426970	+	Chr4.capped.3792	snoRNA_TSS	AT4G09475	intron	host=AT4G36960	2.96	3.22	2.34	4	4.8	10.4	7.74	4.48	6.47
Chr4	18304750	+	Chr4.capped.4069	snoRNA_TSS	AT4G39361|AT4G09845|AT4G39363|AT4G39364|AT4G39366	tandem	cluster=5	5.45	6.1	7.44	11.83	13.6	4.57	6.77	10.84	15.03
Chr4	18304890	+	Chr4.noncapped.4070	snoRNA_5P	AT4G39361	tandem	cluster=5;position=1	53.75	18.49	10.5	0.14	0.46	0.59	15.53	12.7	8.02
Chr4	18305143	+	Chr4.noncapped.4071	snoRNA_5P	AT4G09845	tandem	cluster=5;position=2	0.36	0.33	0.39	0	0	0	0.89	0	0.31
Chr4	18305254	+	Chr4.noncapped.4072	snoRNA_5P	AT4G39363	tandem	cluster=5;position=3	150.71	52.5	43.59	208.31	119.04	80.09	40.18	28.45	36.07
Chr4	18305417	+	Chr4.noncapped.4073	snoRNA_5P	AT4G39364	tandem	cluster=5;position=4	84.87	47.44	36.9	1.95	1.61	0.51	16.64	19.71	12.78
Chr4	18305584	+	Chr4.noncapped.4074	snoRNA_5P	AT4G39366	tandem	cluster=5;position=5	17.38	13.6	18.07	0	0.34	0	6.73	7.12	2.18
Chr4	18395023	+	Chr4.noncapped.4098	tRNA_TSS	AT4G39615	unit	tRNA=trp_CCA	3.43	1.64	1.12	5.82	15.87	4.95	3.93	4.24	0.31
Chr4	18395027	+	Chr4.noncapped.4098	tRNA_5P	AT4G39615	unit	tRNA=trp_CCA	0.55	0.04	0.14	0.59	1.88	0.81	0.24	0.06	0
Chr4	18486324	-	Chr4.capped.4121	miRNA_TSS	AT4G09925	sense	host=AT4G39838;name=ath-miR5658	1.26	0.84	1.23	1.13	1.02	0.75	2.44	3.23	5.45
Chr5	142488	-	Chr5.noncapped.35	snoRNA_5P	AT5G00750	tandem	cluster=2;position=2	2.38	2.29	1.27	0	0	0	5.04	1.91	1.24
Chr5	142632	-	Chr5.noncapped.36	snoRNA_5P	AT5G00755	tandem	cluster=2;position=1	50.01	13.33	11.67	27.06	14.52	9.55	21.99	16.72	9.27
Chr5	142802	-	Chr5.capped.37	snoRNA_TSS	AT5G00755|AT5G00750	tandem	cluster=2	5.36	3.61	3.84	7.64	9.95	3.18	5.33	3.9	0.7
Chr5	146376	-	Chr5.noncapped.39	snoRNA_5P	AT5G00760	intron	host=AT5G01350;cluster=2;position=1	12.36	6.44	3.11	0.13	0.43	0.54	12.91	6.81	2.26
Chr5	146760	-	Chr5.noncapped.40	snoRNA_5P	AT5G00765	intron	host=AT5G01350;cluster=2;position=2	2.62	2.13	1.74	0	0	0	3.82	3.16	0.08
Chr5	147167	-	Chr5.capped.41	snoRNA_TSS	AT5G00760|AT5G00765	intron	host=AT5G01350;cluster=2	136.77	160.03	191.12	131.56	268.51	201.37	330.07	305.5	254.14
Chr5	287676	+	Chr5.capped.87	miRNA_TSS	AT5G01747	unit	name=ath-miR164b	0.06	0.12	0.19	0.22	0	0.19	0.32	0	0.78
Chr5	389962	-	Chr5.noncapped.121	tRNA_5P	AT5G02025	unit	tRNA=gly_GCC	0.23	0	0.14	0.09	0	0.26	0.67	0.48	0.23
Chr5	530821	+	Chr5.capped.163	tRNA_5P	AT5G02435	unit	tRNA=val_AAC	9.5	3.39	0.14	21.21	0	0.12	0	0	0
Chr5	897846	-	Chr5.capped.297	miRNA_TSS	AT5G03552	unit	name=ath-miR822	1.12	2.76	2.88	1.5	1.69	1.64	1.77	6.63	1.56
Chr5	1188209	-	Chr5.noncapped.373	miRNA_3p3P	AT5G04275	unit	name=ath-miR172b	0	0.09	0	0	0	0	0.24	0.28	0.08
Chr5	1188915	-	Chr5.capped.374	miRNA_TSS	AT5G04275	unit	name=ath-miR172b	1.43	0.5	0.48	1.8	0.31	0.86	0.86	0.61	0.39
Chr5	1788673	+	Chr5.capped.548	tRNA_TSS	AT5G05945	UTR	host=AT5G05950;tRNA=asp_GTC	0	0.37	0.4	0.42	0	0	0.13	0.05	0.07
Chr5	1808149	+	Chr5.capped.554	snoRNA_TSS	AT5G01135|AT5G01145	intron	host=AT5G06000;cluster=2	1.2	1.75	1.52	1.71	2.82	1.93	3.02	3.75	7.95
Chr5	1867677	-	Chr5.noncapped.568	snoRNA_5P	AT5G01165	tandem	cluster=2;position=2	38.84	21.78	9.37	0	0.77	0.03	5.44	5.11	2.88
Chr5	1867829	-	Chr5.noncapped.569	snoRNA_5P	AT5G01195	tandem	cluster=2;position=1	23.07	9.91	4.2	0.08	0.54	0	9.78	3.97	1.25
Chr5	1868176	-	Chr5.capped.570	snoRNA_TSS	AT5G01195|AT5G01165	tandem	cluster=2	3.39	2.84	3.27	0	0	0	3.33	2.57	2.57
Chr5	2587897	-	Chr5.noncapped.781	tRNA_5P	AT5G08075	unit	tRNA=ala_CGC	0	0	0	0.29	0.22	0	0	0	0
Chr5	2632452	-	Chr5.noncapped.791	snoRNA_5P	AT5G01495	intron	host=AT5G08180;cluster=3;position=3	0.53	0.49	0.18	0.31	0.96	0.18	0.12	0.09	0
Chr5	2632664	-	Chr5.noncapped.792	snoRNA_5P	AT5G01505	intron	host=AT5G08180;cluster=3;position=2	0.73	1.46	2.01	0	0.26	0.15	1.86	1.1	0.47
Chr5	2633447	-	Chr5.capped.793	snoRNA_TSS	AT5G01515|AT5G01505|AT5G01495	intron	host=AT5G08180;cluster=3	21.58	28.82	36.45	21.95	24.8	20.77	37.2	29.24	65.21
Chr5	2634934	-	Chr5.noncapped.794	miRNA_3p3P	AT5G08185	unit	name=ath-miR162a	0.64	0.28	0.64	0	0	0	0.09	0.48	0.08
Chr5	2634955	-	Chr5.noncapped.794	miRNA_3p5P	AT5G08185	unit	name=ath-miR162a	0.46	0.16	0.1	0	0	0	0.2	0.14	0.16
Chr5	2635438	-	Chr5.capped.795	miRNA_TSS	AT5G08185	unit	name=ath-miR162a	2.17	2.63	2.61	1.45	2.65	2.01	1.51	3.59	2.65
Chr5	2650073	-	Chr5.capped.800	miRNA_TSS	AT5G08210	sense	host=AT5G08230;name=ath-miR834	4.35	2.77	2.46	2.34	3.47	1.43	1.89	1.19	2.81
Chr5	2975011	+	Chr5.capped.913	snRNA_5P	AT5G09585	unit	snRNA=U2	1.1	0.06	5.67	6.28	0.75	21.1	4.68	3.84	4.63
Chr5	2993326	+	Chr5.noncapped.921	tRNA_5P	AT5G09655	unit	tRNA=val_AAC	0	1.49	0	0	31.16	0.61	4.25	0	0
Chr5	3343241	+	Chr5.capped.1031	snoRNA_TSS	AT5G01785|AT5G10572	tandem	cluster=2	1.28	1.93	1.16	1.7	2.12	3.09	3.18	1.63	0.78
Chr5	3343369	+	Chr5.noncapped.1032	snoRNA_5P	AT5G01785	tandem	cluster=2;position=1	2.43	1.35	1.99	0.21	1.67	1.65	1.23	2.05	1.01
Chr5	3343576	+	Chr5.noncapped.1033	snoRNA_5P	AT5G10572	tandem	cluster=2;position=2	3.53	1.93	1.67	0	0.46	0.82	2.83	2.57	1.64
Chr5	3456642	-	Chr5.noncapped.1077	miRNA_3p3P	AT5G10945	unit	name=ath-miR156d	0.12	0.28	0.12	0	0	0	0	0	0
Chr5	3456664	-	Chr5.noncapped.1077	miRNA_3p5P	AT5G10945	unit	name=ath-miR156d	4.26	3.49	1.68	0	0	0	1.05	1.54	1.56
Chr5	3457165	-	Chr5.capped.1078	miRNA_TSS	AT5G10945	unit	name=ath-miR156d	4.28	1.95	1.42	4.72	10.67	3.3	2.01	2.32	1.17
Chr5	3522165	-	Chr5.noncapped.1096	snRNA_5P	AT5G01845	unit	snRNA=U6	0.13	0	0	0	4.07	1.54	0	0	0
Chr5	3799573	+	Chr5.capped.1169	miRNA_TSS	AT5G01915	sense	host=AT5G11790;name=ath-miR5629	7.14	6.19	6.11	13.48	10.82	9.32	6.34	7.51	7.87
Chr5	4222084	-	Chr5.capped.1290	snoRNA_5P	AT5G13225	unit		15.78	6.66	2.41	0.42	0.48	0	6.18	3.13	0.93
Chr5	4222264	-	Chr5.capped.1291	snoRNA_TSS	AT5G13225	unit		1.02	1.68	0.95	0.63	1.74	0.87	1.1	0.35	0.47
Chr5	4480920	-	Chr5.capped.1375	miRNA_TSS	AT5G13887	intron	host=AT5G13890;name=ath-miR848	3.67	5.49	6.33	3.93	4.12	3.87	8.87	13.5	17.45
Chr5	4690972	+	Chr5.capped.1443	miRNA_TSS	AT5G14545	unit	name=ath-miR398b	1.56	2.84	4.08	2.38	4.19	4.69	0	1.82	0.23
Chr5	4691127	+	Chr5.capped.1443	miRNA_3p3P	AT5G14545	unit	name=ath-miR398b	0.01	1	0.49	0	0	0	0	0	0
Chr5	4694625	+	Chr5.capped.1445	miRNA_TSS	AT5G14565	unit	name=ath-miR398c	2.06	2.48	2.03	2.94	1.74	0.36	0	0.16	0
Chr5	4866233	+	Chr5.noncapped.1493	snoRNA_TSS	AT5G02295|AT5G02305|AT5G02315|AT5G02325	tandem	cluster=4	0.5	0.77	0.65	0.7	1.05	1.93	0.27	0.23	0.16
Chr5	4866317	+	Chr5.noncapped.1493	snoRNA_5P	AT5G02295	tandem	cluster=4;position=1	21.88	4.25	1.84	0	0	0.36	3.74	2.85	1.17
Chr5	4866461	+	Chr5.noncapped.1494	snoRNA_5P	AT5G02305	tandem	cluster=4;position=2	53.26	14.74	4.26	7.66	3.46	5.57	17.22	7.71	2.81
Chr5	4866611	+	Chr5.noncapped.1494	snoRNA_5P	AT5G02315	tandem	cluster=4;position=3	17.56	19.29	12.53	0.09	0.41	3.12	17.37	17.31	7.17
Chr5	4866723	+	Chr5.noncapped.1495	snoRNA_5P	AT5G02325	tandem	cluster=4;position=4	32.91	8.46	3.95	14.9	12.39	3.78	18.96	14.2	4.36
Chr5	5448492	+	Chr5.capped.1685	snoRNA_TSS	AT5G02565|AT5G02575	tandem	cluster=2	1.15	1.04	0.62	1.46	0	0.68	0.49	0.44	0.08
Chr5	5448883	+	Chr5.noncapped.1686	snoRNA_5P	AT5G02565	tandem	cluster=2;position=1	22.54	21.55	34.94	0.09	0	0.08	17.09	20.7	13.25
Chr5	5449242	+	Chr5.noncapped.1687	snoRNA_5P	AT5G02575	tandem	cluster=2;position=2	20.22	29.74	44.91	0.5	1.22	1.32	12.68	16.86	20.33
Chr5	5674500	-	Chr5.noncapped.1753	snoRNA_5P	AT5G02665	tandem	cluster=3;position=2	70.88	47.81	19.06	0	1.94	1.68	48.07	28.03	7.56
Chr5	5674673	-	Chr5.noncapped.1754	snoRNA_5P	AT5G02675	tandem	cluster=3;position=1	17.69	11.33	7.16	18.84	18.16	11.86	14.54	7.94	5.53
Chr5	5675041	-	Chr5.capped.1756	snoRNA_TSS	AT5G02675|AT5G02665|AT5G02655	tandem	cluster=3	1.3	1.09	2.11	1.28	2.24	0.88	1.06	0.83	0.47
Chr5	6174998	+	Chr5.capped.1909	snoRNA_TSS	AT5G02915	intron	host=AT5G18580	5.47	5.22	4.62	6.07	3.99	3.36	6.5	5.37	4.68
Chr5	6177760	+	Chr5.noncapped.1910	snoRNA_5P	AT5G02915	intron	host=AT5G18580	2.7	0.82	0.27	0	0	0	1.87	0.33	0.62
Chr5	7168191	+	Chr5.capped.2193	miRNA_TSS	AT5G03305	intron	host=AT5G21100;name=ath-miR1888a	9.96	3.25	2.1	5.18	4.59	8.74	9.11	5.33	9.19
Chr5	7588245	-	Chr5.capped.2288	miRNA_TSS	AT5G03475	intron	host=AT5G22770;name=ath-miR3434	1.3	1.71	1.24	1.82	1.07	1.01	1.11	2.32	2.34
Chr5	7740853	-	Chr5.capped.2316	miRNA_TSS	AT5G23065	unit	name=ath-miR162b	0.24	0.12	0.62	0.14	0.87	0.18	0.09	0.25	0
Chr5	9096524	+	Chr5.capped.2626	miRNA_TSS	AT5G26038	sense	host=AT5G26030;name=ath-miR860	1.75	1.75	1.4	2.09	0.57	2.38	4.19	4.61	7.48
Chr5	9815608	+	Chr5.capped.2762	snoRNA_TSS	AT5G04425	intron	host=AT5G27720	4.76	6.59	9.16	7.18	6.35	10.09	16.68	13.8	32.1
Chr5	9816530	+	Chr5.noncapped.2763	snoRNA_5P	AT5G04425	intron	host=AT5G27720	4.27	1.35	0.84	0.03	0	0	0.95	1.57	1.01
Chr5	9876479	-	Chr5.capped.2776	snoRNA_TSS	AT5G04545	UTR	host=AT5G27860	1.75	4.97	4.56	3.03	2.23	2.78	7.19	8.68	3.74
Chr5	13611702	+	Chr5.capped.2934	miRNA_TSS	AT5G35407	unit	name=ath-miR396b	0.56	0.54	0.51	0.28	1.71	0.52	0.65	0	0.16
Chr5	13611903	+	Chr5.capped.2934	miRNA_3p5P	AT5G35407	unit	name=ath-miR396b	1.89	0.08	0	0.23	3.6	0.14	0.42	0	0
Chr5	15827612	-	Chr5.capped.3240	tRNA_TSS	AT5G39535	intron	host=AT5G39530;tRNA=pro_AGG	5.88	4.46	5.75	5.74	4.16	5.53	10.01	8.18	12.62
Chr5	16166306	-	Chr5.capped.3321	snRNA_5P	AT5G40395	unit	snRNA=U6atac	4.27	1.07	1.88	4.71	8.81	4.29	1.41	1.7	0
Chr5	16423947	+	Chr5.capped.3387	snoRNA_TSS	AT5G06115	intron	host=AT5G41010	49.82	49.82	45.31	39.64	50.49	51.99	120.69	63.64	56.09
Chr5	16424192	+	Chr5.noncapped.3388	snoRNA_5P	AT5G06115	intron	host=AT5G41010	2.57	1.41	0.81	0.06	0	0	0.76	1.26	0.23
Chr5	16598780	+	Chr5.capped.3429	snoRNA_TSS	AT5G41471	unit		48.75	27.07	13.94	18.33	41.04	76.95	20.38	14.02	8.07
Chr5	16598804	+	Chr5.capped.3429	snoRNA_5P	AT5G41471	unit		6.22	2.18	1.22	3.44	0.82	1	1.96	1.24	1.71
Chr5	16975780	-	Chr5.noncapped.3524	snoRNA_5P	AT5G06305	unit		47.87	16	6.45	1	1.13	0.86	16.48	13.06	9.82
Chr5	16975851	-	Chr5.noncapped.3524	snoRNA_TSS	AT5G06305	unit		0.48	1.11	1.2	1.03	0.98	1.86	0.22	1	0.16
Chr5	17516196	+	Chr5.capped.3638	miRNA_TSS	AT5G43603	unit	name=ath-miR166f	0	0.25	0.09	0	0.22	0	0	0.29	0.31
Chr5	17839937	+	Chr5.capped.3720	snoRNA_TSS	AT5G06565|AT5G44286	tandem	cluster=2	3.7	1.99	0.9	2.5	1.94	2.78	3.8	0.37	0.62
Chr5	17840029	+	Chr5.noncapped.3721	snoRNA_5P	AT5G06565	tandem	cluster=2;position=1	0.81	0.48	0.14	0	0	0.07	0.6	0.99	0.16
Chr5	17840219	+	Chr5.noncapped.3722	snoRNA_5P	AT5G44286	tandem	cluster=2;position=2	17.88	7.06	3.6	0.2	0	0.16	2.7	2.61	0.78
Chr5	17985803	+	Chr5.capped.3764	miRNA_TSS	AT5G06605	unit	name=ath-miR5628	0	0.19	0.2	0	0	0.92	0	0.21	0
Chr5	18040851	+	Chr5.capped.3780	tRNA_TSS	AT5G44705	UTR	host=AT5G44710;tRNA=thr_AGT	0.3	0.42	0.3	0.14	0.37	0.14	0.71	0.09	0.62
Chr5	18787388	+	Chr5.noncapped.3933	snRNA_5P	AT5G46315	unit	snRNA=U6	6.34	1.75	1.52	2.96	7.04	2.41	2.41	3.93	1.18
Chr5	18833264	+	Chr5.capped.3942	snoRNA_TSS	AT5G06825	intron	host=AT5G46430	29.55	40.45	55.5	37.93	42.96	41.01	115.42	69.32	110.94
Chr5	18833744	+	Chr5.noncapped.3943	snoRNA_5P	AT5G06825	intron	host=AT5G46430	1.61	0.42	0.98	0.3	0	0	0.15	0.09	0.16
Chr5	19624422	+	Chr5.capped.4171	snoRNA_TSS	AT5G07095|AT5G07105	tandem	cluster=2	5.2	3.29	3.21	4.38	3.81	3.67	2.95	2.14	1.95
Chr5	19624534	+	Chr5.noncapped.4172	snoRNA_5P	AT5G07095	tandem	cluster=2;position=1	7.79	3.59	1.76	0.13	0.41	0.39	5.96	3.67	4.06
Chr5	19624719	+	Chr5.noncapped.4173	snoRNA_5P	AT5G07105	tandem	cluster=2;position=2	35.74	7.13	5.69	2.84	2.06	1.99	12.06	4.27	3.03
Chr5	19641596	+	Chr5.capped.4178	tRNA_TSS	AT5G48465	UTR	host=AT5G48470;tRNA=lys_TTT	0.23	0	0	0.16	0.35	1.35	0	0	0
Chr5	20795592	+	Chr5.capped.4458	snoRNA_TSS	AT5G07725|AT5G51174|AT5G07735	tandem	cluster=3	3.57	2.95	4	8.79	1.84	2.79	2.15	0.83	2.1
Chr5	20795721	+	Chr5.noncapped.4459	snoRNA_5P	AT5G07725	tandem	cluster=3;position=1	4.66	3.97	3.31	0.11	0.72	0.16	10.88	6.65	4.52
Chr5	20795961	+	Chr5.noncapped.4460	snoRNA_5P	AT5G51174	tandem	cluster=3;position=2	8.97	3.37	3.02	0	0	0	3.09	1.74	0.78
Chr5	20796129	+	Chr5.noncapped.4461	snoRNA_5P	AT5G07735	tandem	cluster=3;position=3	43.72	23.33	18.22	0.23	0.57	1.3	14.31	13.12	14.41
Chr5	21161311	+	Chr5.capped.4546	miRNA_TSS	AT5G07875	intron	host=AT5G52070;name=ath-miR4245	4	2.45	2.97	9.52	6.53	4.78	6.84	7.64	5.85
Chr5	21294207	+	Chr5.capped.4584	snoRNA_TSS	AT5G52471	intron	host=AT5G52470	170.77	74.5	85.33	109.28	84.8	104.3	103.65	62.41	87.42
Chr5	21295737	+	Chr5.noncapped.4585	snoRNA_5P	AT5G52471	intron	host=AT5G52470	4.29	1.76	0.41	1.16	2.67	0.68	2.83	1.28	0.78
Chr5	21643500	-	Chr5.capped.4669	miRNA_TSS	AT5G07965	sense	host=AT5G53340;name=ath-miR8181	0.49	1.39	0.97	0.44	0.92	1.38	1.79	2.07	0.08
Chr5	21826669	-	Chr5.capped.4714	snRNA_5P	AT5G08025	antisense	host=AT5G53770;snRNA=u5	0	0	0	0	0	0	0	0	0
Chr5	21887472	+	Chr5.capped.4728	snoRNA_TSS	AT5G53902	unit		0	0.17	0	0	0	0	0	0	0
Chr5	21888291	+	Chr5.noncapped.4729	snoRNA_5P	AT5G53902	unit		2.06	6.53	2.74	2.31	10.24	17.39	3.76	1.37	0.32
Chr5	21945606	-	Chr5.noncapped.4741	snoRNA_5P	AT5G54075	unit		3.78	0	4.92	0.43	39.28	10.36	0.36	1.44	0
Chr5	22074400	+	Chr5.noncapped.4771	tRNA_TSS	AT5G54365	unit	tRNA=phe_GAA	0.1	0	0.02	0.75	0.47	0.78	0.26	0.22	0.03
Chr5	22074405	+	Chr5.noncapped.4771	tRNA_5P	AT5G54365	unit	tRNA=phe_GAA	0	0	0.02	0.41	0.21	0	0	0	0
Chr5	22251945	-	Chr5.capped.4812	miRNA_TSS	AT5G08255	sense	host=AT5G54780;name=ath-miR2938	0.64	1.82	1.29	0.47	0.38	0.91	0.34	0.93	0.55
Chr5	22597176	-	Chr5.capped.4929	miRNA_TSS	AT5G55835	unit	name=ath-miR156h	0.04	0.07	0.53	0	0.41	0.11	0.18	0.4	0.16
Chr5	22828130	+	Chr5.noncapped.4997	tRNA_5P	AT5G56365	unit	tRNA=ile_AAT	1.51	0.84	0.27	0	0.81	1.52	0	0.03	0
Chr5	22828417	+	Chr5.capped.4999	snoRNA_TSS	AT5G08495|AT5G08515|AT5G08525	tandem	cluster=3	11.85	8.31	8.95	16.71	12.31	8.94	11.61	13.4	35.13
Chr5	22828501	+	Chr5.noncapped.5000	snoRNA_5P	AT5G08495	tandem	cluster=3;position=1	0.63	0.19	0.58	0.22	2.42	0	0.45	0	0
Chr5	22828809	+	Chr5.noncapped.5001	snoRNA_5P	AT5G08515	tandem	cluster=3;position=2	27.75	4.65	2.58	1.84	11	3.54	18.57	14.16	5.69
Chr5	22828961	+	Chr5.noncapped.5002	snoRNA_5P	AT5G08525	tandem	cluster=3;position=3	4.73	1.68	1.98	1.36	3.86	2.1	1.38	1.05	1.25
Chr5	23439499	+	Chr5.capped.5176	snoRNA_TSS	AT5G08805	intron	host=AT5G57870	1.52	1.92	0.74	1.54	0	1.45	1.3	1.88	0.55
Chr5	23440275	+	Chr5.noncapped.5177	snoRNA_5P	AT5G08805	intron	host=AT5G57870	0.66	0.1	0.22	0	0	0	0.62	0.46	0
Chr5	23682962	-	Chr5.noncapped.5272	snoRNA_5P	AT5G58595	tandem	cluster=4;position=4	1.71	0.71	0.93	0	3.4	0.65	1.63	1.38	0.55
Chr5	23683487	-	Chr5.noncapped.5273	snoRNA_5P	AT5G08865	tandem	cluster=4;position=1	0.56	0.96	1.35	0.31	0	0.08	0.05	0.96	0.31
Chr5	23683629	-	Chr5.capped.5274	snoRNA_TSS	AT5G08865|AT5G08860|AT5G08850|AT5G58595	tandem	cluster=4	1.53	1.92	3.03	2.57	1.49	2.45	5.88	3.34	1.64
Chr5	24140018	-	Chr5.noncapped.5427	tRNA_5P	AT5G59945	unit	tRNA=val_AAC	17.92	2.2	4.86	0	0	4.65	0.58	4.33	0
Chr5	24531662	+	Chr5.noncapped.5533	tRNA_TSS	AT5G60966	unit	tRNA=thr_CGT	0.89	0.04	0	0.29	0.5	0.68	0.5	0.23	0.24
Chr5	24709140	-	Chr5.noncapped.5586	snoRNA_5P	AT5G09000	tandem	cluster=2;position=2	29.98	14.93	7.7	0	0	0.14	13.07	14.43	11.92
Chr5	24709295	-	Chr5.noncapped.5587	snoRNA_5P	AT5G09005	tandem	cluster=2;position=1	5.94	1.34	0.58	0	0	0	5.24	1.67	0.31
Chr5	24709536	-	Chr5.noncapped.5588	snoRNA_TSS	AT5G09005|AT5G09000	tandem	cluster=2	1.31	0.72	1	0.59	2.8	1.24	0.19	0.19	0.16
Chr5	24713602	-	Chr5.noncapped.5590	snRNA_5P	AT5G61455	unit	snRNA=U2	0.92	3.91	5.66	0	1.28	0.04	0	23.89	0
Chr5	25231824	-	Chr5.capped.5767	miRNA_TSS	AT5G62848	intron	host=AT5G62850;name=ath-miR420	39.71	8.41	16.74	47.52	86.1	75.01	21.11	114.91	37.01
Chr5	25784114	+	Chr5.noncapped.5946	tRNA_5P	AT5G64505	unit	tRNA=val_AAC	0	0.98	0	0	16.11	0.61	1.54	0	0
Chr5	26348898	-	Chr5.capped.6121	snoRNA_5P	AT5G09495	intron	host=AT5G65860	2.54	2.56	1.42	0.92	0.52	0.21	3.3	2.13	2.81
Chr5	26349058	-	Chr5.capped.6121	snoRNA_TSS	AT5G09495	intron	host=AT5G65860	5.45	4.97	6.97	5.77	5.04	3.98	7.01	9.49	4.91
Chr5	26349824	-	Chr5.noncapped.6122	snoRNA_5P	AT5G09515	unit		21.58	12.44	8.79	0.28	0.54	0.32	18.16	13.45	0.7
Chr5	26349969	-	Chr5.capped.6123	snoRNA_TSS	AT5G09515	unit		1.47	0.52	0.39	0.5	2.4	0.91	0.62	0.44	0.16
Chr5	26411715	-	Chr5.capped.6146	miRNA_TSS	AT5G66045	unit	name=ath-miR170	0	0.29	0.05	0	0	0	1.55	0.6	0.23
Chr5	26567135	+	Chr5.capped.6212	snoRNA_TSS	AT5G66562|AT5G66564|AT5G66567	tandem	cluster=3	0.34	0.25	0.53	0.32	0	0.29	0.21	0.11	0
Chr5	26567368	+	Chr5.noncapped.6213	snoRNA_5P	AT5G66562	tandem	cluster=3;position=1	1.62	0.27	0.26	0	0	0	0.81	0.31	0.63
Chr5	26567520	+	Chr5.noncapped.6214	snoRNA_5P	AT5G66564	tandem	cluster=3;position=2	4.83	0.46	0.66	0	0	0	1.14	2.06	0.78
Chr5	26567662	+	Chr5.noncapped.6215	snoRNA_5P	AT5G66567	tandem	cluster=3;position=3	18	1.57	0.93	0.03	0.53	0	0.36	0	0.17
Chr5	26568396	+	Chr5.noncapped.6216	tRNA_5P	AT5G66568	unit	tRNA=ile_AAT	3.1	1.39	0.37	0	1.5	2.33	0	0.04	0
ChrC	4309	-	ChrC.noncapped.9	tRNA_3P	ATCG00030	tandem	host=ATCG00040;tRNA=lys_TTT	246.19	203.28	140.23	12.03	12.74	10.55	227.57	182.76	265.21
ChrC	4450	-	ChrC.noncapped.10	tRNA_TSS	ATCG00030	tandem	host=ATCG00040;tRNA=lys_TTT	125.29	179.16	210.26	57.14	83.24	48.24	95.28	140.88	181.84
ChrC	6613	-	ChrC.noncapped.23	tRNA_3P	ATCG00060	unit	tRNA=gln_TTG	6.44	2.17	1.08	0.88	0.47	0.2	2.73	2.22	0.16
ChrC	6686	-	ChrC.noncapped.23	tRNA_5P	ATCG00060	unit	tRNA=gln_TTG	0.09	0.3	0.16	0.3	0.66	0.29	0	0.22	0
ChrC	6707	-	ChrC.noncapped.23	tRNA_TSS	ATCG00060	unit	tRNA=gln_TTG	1.1	0.76	0.25	1.11	0.97	0.63	2.69	0.9	0
ChrC	6853	+	ChrC.capped.21	tRNA_TSS	ATCG00090	tandem	host=ATCG00070;tRNA=ser_GCT	424.64	653.7	490.49	690.61	596.17	1142.31	350.26	595.85	67.54
ChrC	8642	+	ChrC.noncapped.28	tRNA_TSS	ATCG00100	unit	tRNA=gly_TCC	28.38	29.73	36.96	46.56	33.73	61.9	15.58	14.19	27.04
ChrC	8645	+	ChrC.noncapped.28	tRNA_5P	ATCG00100	unit	tRNA=gly_TCC	7.96	4.87	3.63	0.79	2.77	1.31	0.75	1.06	0.62
ChrC	27151	+	ChrC.capped.81	tRNA_TSS	ATCG00200	unit	tRNA=cys_GCA	104.07	100.27	54.21	76.72	83.57	113.01	56.7	57.98	162.28
ChrC	27443	+	ChrC.noncapped.83	tRNA_3P	ATCG00200	unit	tRNA=cys_GCA	23.97	17.15	13.47	0.48	0	0	13.04	11.08	12.63
ChrC	29798	-	ChrC.noncapped.92	tRNA_3P	ATCG00230	unit	tRNA=asp_GTC	7.18	5.97	5.31	0.16	0.31	0.5	9.65	8.51	10.75
ChrC	30464	-	ChrC.noncapped.95	tRNA_3P	ATCG00250	tandem	cluster=2;position=1;tRNA=glu_TTC	9.28	8.29	5.4	6.66	3.29	2.53	8.28	6.42	7.71
ChrC	30537	-	ChrC.noncapped.95	tRNA_5P	ATCG00250	tandem	cluster=2;position=1;tRNA=glu_TTC	1.96	2.84	2.99	2.91	5.35	3.35	3.9	1.87	0.86
ChrC	30564	-	ChrC.noncapped.95	tRNA_TSS	ATCG00240|ATCG00250	tandem	cluster=2	2.78	1.87	2.96	2.04	1.49	1.44	0.76	1.19	1.17
ChrC	33525	+	ChrC.noncapped.108	tRNA_TSS	ATCG00290	tandem	host=ATCG00280,ATCG00300;tRNA=ser_TGA	32.86	77.5	67.77	139.26	93.4	84.59	47.67	57.05	42.07
ChrC	36357	+	ChrC.noncapped.116	tRNA_TSS	ATCG00310	unit	tRNA=gly_GCC	0.18	0.35	0.37	0.06	1.13	0	0.07	0.15	0
ChrC	36489	+	ChrC.noncapped.116	tRNA_5P	ATCG00310	unit	tRNA=gly_GCC	0.42	0.17	0.23	0.43	1.39	1.21	0.8	0.9	0.47
ChrC	36560	+	ChrC.noncapped.116	tRNA_3P	ATCG00310	unit	tRNA=gly_GCC	5.49	3.9	4.04	0	0	0	3.72	9.35	3.74
ChrC	44823	+	ChrC.noncapped.129	tRNA_TSS	ATCG00370	unit	tRNA=ser_GGA	1.87	2.84	1.58	4.34	5.44	5.97	2.99	2.38	2.03
ChrC	44826	+	ChrC.noncapped.129	tRNA_5P	ATCG00370	unit	tRNA=ser_GGA	1.81	0.04	0.31	0.28	0.85	1.06	0.61	0.05	0
ChrC	46751	+	ChrC.noncapped.137	tRNA_TSS	ATCG00400	unit	tRNA=leu_TAA	625.04	215.31	217.52	1055.25	1556.18	500.18	169.84	352.97	159.72
ChrC	46893	+	ChrC.capped.138	tRNA_5P	ATCG00400	unit	tRNA=leu_TAA	86.88	43.78	35.32	31.22	50.72	43.42	34.69	25.64	64.97
ChrC	46928	+	ChrC.capped.138	tRNA_3P	ATCG00400	unit	tRNA=leu_TAA	26.22	14.76	16.34	3.22	10.52	10.9	10.47	9.64	7.56
ChrC	47702	+	ChrC.noncapped.141	tRNA_TSS	ATCG00410	unit	tRNA=phe_GAA	4.14	4.18	6.18	2.53	5.95	2.96	1.29	0.95	0.86
ChrC	48247	+	ChrC.noncapped.142	tRNA_3P	ATCG00410	unit	tRNA=phe_GAA	3.15	4	1.7	0	0	0	2.42	1.07	1.17
ChrC	51197	-	ChrC.noncapped.151	tRNA_3P	ATCG00450	unit	tRNA=val_TAC	9.34	12.1	7.84	0.2	0	0	21.9	36.54	10.52
ChrC	51870	-	ChrC.noncapped.152	tRNA_5P	ATCG00450	unit	tRNA=val_TAC	12.8	12.61	17.54	7.13	14.9	7.52	6.3	7.57	3.97
ChrC	51884	-	ChrC.noncapped.152	tRNA_TSS	ATCG00450	unit	tRNA=val_TAC	46.43	51.96	52.1	43.7	64.54	39.88	37.81	35.04	27.5
ChrC	66488	-	ChrC.noncapped.194	tRNA_3P	ATCG00620	unit	tRNA=pro_TGG	4.04	5.46	5.03	0	0	0	1.42	2.53	0.08
ChrC	66562	-	ChrC.noncapped.194	tRNA_5P	ATCG00620	unit	tRNA=pro_TGG	17.45	24.38	25.85	14.75	20.21	16.48	17.38	18.63	8.49
ChrC	66576	-	ChrC.noncapped.194	tRNA_TSS	ATCG00620	unit	tRNA=pro_TGG	0.68	1.26	1.09	0.61	1.47	1.02	1.4	0.92	0.78
ChrC	86310	-	ChrC.noncapped.247	tRNA_3P	ATCG00850	tandem	host=ATCG00820,ATCG00830,ATCG00840;tRNA=ile_CAT	9.09	7.63	5	0	0	0.05	6.26	6.05	1.48
ChrC	86416	-	ChrC.noncapped.248	tRNA_TSS	ATCG00850	tandem	host=ATCG00820,ATCG00830,ATCG00840;tRNA=ile_CAT	0.94	1.18	1.28	0.56	0.77	1.94	1.34	1.22	2.03
ChrC	100686	+	ChrC.noncapped.263	tRNA_TSS	ATCG00910	unit	tRNA=val_GAC	0.59	0	0.27	0.41	0	0.23	0.08	0.3	0.04
ChrC	100708	+	ChrC.noncapped.263	tRNA_5P	ATCG00910	unit	tRNA=val_GAC	0.09	0	0	0.45	0	0	0	0	0
ChrC	100899	+	ChrC.noncapped.264	tRNA_TSS	ATCG00930|ATCG00940	tandem	cluster=2	267.73	0	49.86	609.43	106.59	92.45	19.74	35.72	49.01
ChrC	102800	+	ChrC.noncapped.264	tRNA_5P	ATCG00930	tandem	host=ATCG00920,ATCG00950;cluster=2;position=1;tRNA=ile_GAT	177.48	0	0.72	62.79	0	148.23	0	0	15.88
ChrC	103601	+	ChrC.noncapped.264	tRNA_3P	ATCG00930	tandem	host=ATCG00920,ATCG00950;cluster=2;position=1;tRNA=ile_GAT	22.61	0	0.01	2.78	0.2	7.33	0	0	1.29
ChrC	103664	+	ChrC.noncapped.264	tRNA_5P	ATCG00940	tandem	host=ATCG00920,ATCG00950;cluster=2;position=2;tRNA=ala_TGC	34.92	0	0.01	12.61	0.12	7.35	0	0	5.34
ChrC	104539	+	ChrC.noncapped.264	tRNA_3P	ATCG00940	tandem	host=ATCG00920,ATCG00950;cluster=2;position=2;tRNA=ala_TGC	3.64	0	0	0	0	0	0	0	0.19
ChrC	107947	+	ChrC.noncapped.274	tRNA_TSS	ATCG00980	tandem	host=ATCG00970;tRNA=arg_ACG	395.74	0.01	0.65	164.57	0	491.44	0	0	23.14
ChrC	109011	-	ChrC.noncapped.278	tRNA_3P	ATCG00990	unit	tRNA=asn_GTT	0.04	0.51	0.08	0	0	0	0	0	0
ChrC	114260	+	ChrC.noncapped.299	tRNA_TSS	ATCG01030	tandem	host=ATCG01040;tRNA=leu_TAG	23.5	15.2	10	11.93	9.93	14.36	21.18	17.37	3.27
ChrC	114269	+	ChrC.noncapped.299	tRNA_5P	ATCG01030	tandem	host=ATCG01040;tRNA=leu_TAG	2.18	0.9	0.39	0.74	1.43	1.96	0.97	0.82	0.86
ChrC	114349	+	ChrC.noncapped.299	tRNA_3P	ATCG01030	tandem	host=ATCG01040;tRNA=leu_TAG	2.72	3.95	1.56	0	0	0	3.53	2.12	1.4
ChrC	129417	+	ChrC.noncapped.364	tRNA_TSS	ATCG01140	unit	tRNA=asn_GTT	0.24	0.51	0.47	0.13	1.14	1.76	0.29	0.25	0.27
ChrC	130409	-	ChrC.noncapped.367	tRNA_TSS	ATCG01150	unit	tRNA=arg_ACG	0.05	0	0	0.2	0.54	0.08	0	0.13	0
ChrC	134109	-	ChrC.noncapped.373	tRNA_3P	ATCG01190	tandem	cluster=2;position=2;tRNA=ala_TGC	0	2.51	1.27	0	0	0	1.63	0.68	0.35
ChrC	134983	-	ChrC.noncapped.375	tRNA_5P	ATCG01190	tandem	cluster=2;position=2;tRNA=ala_TGC	0	13.23	10.2	0	14.95	0	7.65	4.57	4.52
ChrC	135046	-	ChrC.noncapped.375	tRNA_3P	ATCG01200	tandem	cluster=2;position=1;tRNA=ile_GAT	0.01	8.55	5.55	0	4.6	0	1.95	3.48	1.17
ChrC	135847	-	ChrC.noncapped.377	tRNA_5P	ATCG01200	tandem	cluster=2;position=1;tRNA=ile_GAT	0.01	118.64	84.04	0	111.63	0	78.42	53.36	14.93
ChrC	137961	-	ChrC.noncapped.384	tRNA_TSS	ATCG01220	unit	tRNA=val_GAC	0.67	0.65	0.38	0.04	0	0.12	0.04	0.55	0.04
ChrC	144292	+	ChrC.noncapped.397	tRNA_5P	ATCG01260	unit	tRNA=leu_CAA	0.08	0.04	0	0.17	0.48	0.39	0.05	0	0.04
ChrC	152232	+	ChrC.noncapped.408	tRNA_TSS	ATCG01290	unit	tRNA=ile_CAT	0	0	0	2.04	0.82	0	0	0	0
ChrM	28896	-	ChrM.noncapped.35	tRNA_3P	ATMG00100	tandem	host=ATMG00090;tRNA=lys_TTT	21.46	21.07	16.13	0.13	0.37	0.46	5.53	8.99	3.91
ChrM	28969	-	ChrM.noncapped.35	tRNA_5P	ATMG00100	tandem	host=ATMG00090;tRNA=lys_TTT	1.8	0.7	1.02	0.13	0.67	0.25	0.98	0.65	0.39
ChrM	46915	+	ChrM.noncapped.53	tRNA_TSS	ATMG09450	unit	tRNA=ser_TGA	2.01	1.46	0	3.08	2.6	1.02	1.26	1.25	1.43
ChrM	53734	-	ChrM.noncapped.59	tRNA_3P	ATMG00190	tandem	host=ATMG00180;tRNA=gly_GCC	6.98	8.82	13.15	0.07	0.5	0.22	4.97	7.74	1.87
ChrM	53806	-	ChrM.noncapped.59	tRNA_5P	ATMG00190	tandem	host=ATMG00180;tRNA=gly_GCC	1.4	0.7	0.53	0.35	1.79	0.76	0.54	0.62	0.27
ChrM	62348	+	ChrM.noncapped.64	tRNA_5P	ATMG00230	unit	tRNA=ser_GGA	0.17	0.02	0.06	0.02	0	0.04	0	0.03	0.04
ChrM	62435	+	ChrM.noncapped.64	tRNA_3P	ATMG00230	unit	tRNA=ser_GGA	0.58	0.78	0.65	0	0	0	0.14	0.6	0.16
ChrM	71355	+	ChrM.noncapped.65	tRNA_TSS	ATMG00250	unit	tRNA=met-i_CAT	31.45	26.25	17.36	47.56	44.1	44.78	16.7	17.47	16.4
ChrM	71452	+	ChrM.noncapped.66	tRNA_5P	ATMG00250	unit	tRNA=met-i_CAT	3.75	1.25	0.73	2.17	3.09	5.88	0.9	1.05	0.16
ChrM	71526	+	ChrM.noncapped.67	tRNA_3P	ATMG00250	unit	tRNA=met-i_CAT	2.23	4.68	2.67	0	0	0	2.9	5.02	5.22
ChrM	103758	+	ChrM.noncapped.82	tRNA_TSS	ATMG00330|ATMG00340|ATMG00350|ATMG00360|ATMG00380|ATMG00390	tandem	cluster=6	7.83	10.69	9.1	26.7	19.56	16.89	10.66	11.82	13.44
ChrM	103826	+	ChrM.noncapped.82	tRNA_5P	ATMG00330	tandem	cluster=6;position=1;tRNA=ser_GCT	0	0.56	0.26	0.16	0	3.34	1.66	0.06	0
ChrM	103914	+	ChrM.noncapped.83	tRNA_3P	ATMG00330	tandem	cluster=6;position=1;tRNA=ser_GCT	0	1.93	0.95	0.08	0.97	1.11	5.53	0.07	0
ChrM	104220	+	ChrM.noncapped.84	tRNA_5P	ATMG00340	tandem	cluster=6;position=2;tRNA=tyr_GTA	0.7	0.27	1.17	0.68	1.62	0.36	1.74	0.01	0.08
ChrM	104295	+	ChrM.noncapped.84	tRNA_3P	ATMG00340	tandem	cluster=6;position=2;tRNA=tyr_GTA	29.7	11.99	8.17	0.46	1.68	0.46	16.65	13.86	4.19
ChrM	104456	+	ChrM.noncapped.85	tRNA_5P	ATMG00350	tandem	cluster=6;position=3;tRNA=pro_TGG	0.29	0.23	0.03	0.09	0	0	0.21	0.23	0
ChrM	104532	+	ChrM.noncapped.85	tRNA_3P	ATMG00350	tandem	cluster=6;position=3;tRNA=pro_TGG	0.87	1.52	0.96	0	0.32	0	1.64	1.07	0.55
ChrM	104884	+	ChrM.noncapped.86	tRNA_5P	ATMG00360	tandem	cluster=6;position=4;tRNA=cys_GCA	0.88	0.16	0.29	0.39	0.74	1.22	0.38	0.32	0.19
ChrM	104955	+	ChrM.noncapped.86	tRNA_3P	ATMG00360	tandem	cluster=6;position=4;tRNA=cys_GCA	4.54	3.05	2.84	0.26	0	0.05	1.92	2.82	3.16
ChrM	105948	+	ChrM.noncapped.87	tRNA_3P	ATMG00380	tandem	cluster=6;position=5;tRNA=asn_GTT	1.25	1.79	1.4	0	0.24	0	0.9	0.65	0.16
ChrM	111593	+	ChrM.noncapped.94	tRNA_TSS	ATMG00420	tandem	host=ATMG00410;tRNA=ser_TGA	12.14	21.27	19.73	3.19	4.94	8.1	13.23	14.06	6.33
ChrM	113039	+	ChrM.noncapped.96	tRNA_3P	ATMG00420	tandem	host=ATMG00410;tRNA=ser_TGA	3.28	1.2	1.66	0	0	0	0.82	0.9	0.57
ChrM	127018	-	ChrM.noncapped.101	tRNA_3P	ATMG00460	unit	tRNA=ile_CAT	0.59	0.4	0.93	0.05	0.54	0.14	0.06	0.48	0.27
ChrM	127093	-	ChrM.noncapped.101	tRNA_5P	ATMG00460	unit	tRNA=ile_CAT	0.43	0.64	0.29	0.52	0.57	0.05	0.52	0.42	0.23
ChrM	127242	-	ChrM.noncapped.101	tRNA_TSS	ATMG00460	unit	tRNA=ile_CAT	0.16	0.29	0.3	0.08	0.42	0.27	0	0.29	0.12
ChrM	181080	+	ChrM.noncapped.152	tRNA_TSS	ATMG09730	unit	tRNA=ser_TGA	2.01	1.46	0	3.08	2.6	1.02	1.26	1.25	1.43
ChrM	191952	-	ChrM.noncapped.164	tRNA_3P	ATMG09740	unit	tRNA=tyr_GTA	4.41	3.92	1.96	0	0	0	3.33	3.5	0.44
ChrM	192024	-	ChrM.noncapped.165	tRNA_5P	ATMG09740	unit	tRNA=tyr_GTA	0.52	0.32	0.47	0	0.47	0.15	0.62	0.35	0
ChrM	192178	-	ChrM.noncapped.166	tRNA_TSS	ATMG09740	unit	tRNA=tyr_GTA	2.94	2.53	2.39	1.77	4.96	1.39	1.38	1.07	0.47
ChrM	204338	-	ChrM.noncapped.175	tRNA_3P	ATMG00700	unit	tRNA=lys_TTT	1.51	0.07	0.83	0	0.74	0	0.89	0.41	0.06
ChrM	204411	-	ChrM.noncapped.175	tRNA_5P	ATMG00700	unit	tRNA=lys_TTT	0.12	0	0.06	0.13	0.67	0.25	0.16	0.03	0.39
ChrM	226790	+	ChrM.noncapped.185	tRNA_TSS	ATMG00780|ATMG00790|ATMG00800	tandem	cluster=3	1.06	0.39	0.16	0.48	0.12	0.03	0	0	0.16
ChrM	227615	+	ChrM.noncapped.187	tRNA_5P	ATMG00800	tandem	cluster=3;position=3;tRNA=glu_TTC	1.39	0.04	0.04	0.02	0.22	0.4	0.18	0.13	0.08
ChrM	227687	+	ChrM.noncapped.187	tRNA_3P	ATMG00800	tandem	cluster=3;position=3;tRNA=glu_TTC	2.64	2.58	3.21	0.09	0.14	0	0.73	1.53	1.4
ChrM	250078	-	ChrM.noncapped.193	tRNA_3P	ATMG00930	unit	tRNA=trp_CCA	0.34	0.23	0.34	0	0	0	1.23	0.61	0.19
ChrM	254503	-	ChrM.noncapped.196	tRNA_3P	ATMG00950	unit	tRNA=gln_TTG	0.36	0.27	0.98	0	0.24	0	0.2	0.51	0
ChrM	275068	+	ChrM.noncapped.206	tRNA_TSS	ATMG01070	unit	tRNA=asp_GTC	0.15	0.05	0.07	0	0	0	0.04	0.05	0
ChrM	275102	+	ChrM.noncapped.206	tRNA_5P	ATMG01070	unit	tRNA=asp_GTC	0.99	0.26	0.29	0.17	0.27	0.42	0.18	0.22	0.97
ChrM	275176	+	ChrM.noncapped.206	tRNA_3P	ATMG01070	unit	tRNA=asp_GTC	1.02	1.83	1.71	0	0.31	0	0.2	0.77	0.16
ChrM	296686	-	ChrM.noncapped.221	tRNA_3P	ATMG01160	tandem	host=ATMG01170;tRNA=ser_TGA	0.36	1.24	1.39	0	0	0	1.41	0.93	0.41
ChrM	298196	-	ChrM.noncapped.224	tRNA_TSS	ATMG01160	tandem	host=ATMG01170;tRNA=ser_TGA	2.25	3.14	2.86	2.12	1.19	0.44	1.98	2.03	1.76
ChrM	333649	-	ChrM.noncapped.247	tRNA_3P	ATMG09950	unit	tRNA=tyr_GTA	0	0	0.2	0	0	0	0.06	0.14	0
ChrM	333724	-	ChrM.noncapped.247	tRNA_5P	ATMG09950	unit	tRNA=tyr_GTA	0.7	0.89	1.07	0.37	0.75	0.22	0.78	1.28	0.86
ChrM	333731	-	ChrM.noncapped.247	tRNA_TSS	ATMG09950	unit	tRNA=tyr_GTA	0.1	0.13	0.27	0.03	0	0.04	0	0	0.27
ChrM	337668	+	ChrM.noncapped.250	tRNA_5P	ATMG01340	unit	tRNA=met-e_CAT	0.53	0.03	0.14	0	0.27	0	0.03	0.16	0.04
ChrM	337741	+	ChrM.noncapped.250	tRNA_3P	ATMG01340	unit	tRNA=met-e_CAT	0.37	0.92	2.3	0.19	0	0	0.86	1.64	0.35
ChrM	347265	+	ChrM.noncapped.256	tRNA_5P	ATMG09960	unit	tRNA=thr_TGT	0.17	0	0.09	0	0	0.16	0.15	0	0.16
ChrM	347348	+	ChrM.noncapped.256	tRNA_3P	ATMG09960	unit	tRNA=thr_TGT	0.63	0.72	0.99	0	0	0	0.19	0.49	0.39
ChrM	359663	-	ChrM.noncapped.267	tRNA_3P	ATMG09980	unit	tRNA=his_GTG	0.26	0.13	1.53	0	0	0	0.75	0.94	0.08
ChrM	359739	-	ChrM.noncapped.267	tRNA_5P	ATMG09980	unit	tRNA=his_GTG	0.43	0.29	0.44	0.33	0.65	0.66	0.22	0.23	0.16
