# Supplementary material for: NanoPARE: parallel analysis of RNA 5′ ends from low-input RNA
Source: Genome Res. 2018 Dec;28(12):1931–42. doi: 10.1101/gr.239202.118 (PMC6280765; doi:10.1101/gr.239202.118)
Supplement: Supplemental Material [file supp_gr.239202.118_Supplemental_Data_S4.xlsx]

## Sheet: Col-0 (-Xrn1) (biorep #1)
Supplemental Data S4. miRNA cleavage sites identified from capmasked nanoPARE libraries
RPM: Reads per million transcriptome-mapping reads
Target transcript	miRNA	miRNA slice site position in target transcript	Allen score of sRNA:target duplex	Slice site RPM	Slice site RPM + 1/Maximum adjacent site RPM + 1	Previously verified by 5' RACE?	Target gene common name	Interaction name	P-value adjusted for multiple testing
AT1G27360.4	miR156j	1309	0	0.930111	1.10084	no	SPL11	miR156j:SPL11	0
AT1G31280.1	miR403-3p	3232	1	1.12228	1.39375	yes	AGO2	miR403-3p:AGO2	0
AT1G33120.1	miR5630a	309	0	0.00384343	0.984916	no	NA	miR5630a:AT1G33120.1	0
AT1G33140.1	miR5630a	309	0	0.718722	0.411701	no	PGY2	miR5630a:PGY2	0
AT1G70700.2	miR169d	787	2.5	1.6373	0.86076	no	JAZ9	miR169d:JAZ9	0
AT1G77850.1	miR160a-5p	1419	0.5	22.9568	23.9568	yes	ARF17	miR160a-5p:ARF17	0
AT2G02850.1	miR408-3p	107	1	0.580359	0.81393	yes	ARPN	miR408-3p:ARPN	0
AT2G28350.1	miR160a-5p	1339	2	4.62365	3.62009	yes	ARF10	miR160a-5p:ARF10	0
AT2G45160.1	miR171a-3p	1013	0	13.5904	4.3575	yes	ATHAM1	miR171a-3p:ATHAM1	0
AT3G11100.1	miR414	512	2	0.353596	0.909604	no	NA	miR414:AT3G11100.1	0
AT3G17185.2	miR390a-5p	863	4.5	3.52443	4.52443	yes	TAS3a	miR390a-5p:TAS3a	0
AT3G60630.1	miR171a-3p	1055	0	9.50866	1.32587	yes	ATHAM2	miR171a-3p:ATHAM2	0
AT4G00150.1	miR171a-3p	866	0	4.53525	2.56633	yes	ATHAM3	miR171a-3p:ATHAM3	0
AT4G36920.2	miR172c	1303	1	1.97937	2.2654	yes	AP2	miR172c:AP2	0
AT4G39840.1	miR5658	619	0	0.830182	1.08921	no	NA	miR5658:AT4G39840.1	0
AT5G05100.1	miR854a	830	1	0.24598	1.0728	no	NA	miR854a:AT5G05100.1	0
AT5G06510.3	miR169h	1238	3	2.65197	2.19856	yes	NF-YA10	miR169h:NF-YA10	0
AT5G22640.2	miR414	1793	2	0.253667	0.885927	no	emb1211	miR414:emb1211	0
AT5G23420.2	miR414	390	2	0.292101	0.705996	no	HMGB6	miR414:HMGB6	0
AT5G24890.1	miR414	772	1	0.265197	0.478337	no	NA	miR414:AT5G24890.1	0
AT5G37020.2	miR167a-5p	2380	4	4.96572	3.93772	yes	ARF8	miR167a-5p:ARF8	0
AT5G39740.2	miR414	997	1.5	1.46435	0.419298	no	OLI7	miR414:OLI7	0
AT5G43270.3	miR156j	1111	0	0.303631	0.839182	yes	SPL2	miR156j:SPL2	0
AT5G57735.1	miR390a-5p	428	4.5	2.3714	3.3714	yes	TAS3c	miR390a-5p:TAS3c	0
AT5G60120.2	miR172a	1820	1	1.47972	2.10032	yes	TOE2	miR172a:TOE2	0
AT2G27400.1	miR173-5p	378	2.5	4.75048	5.75048	yes	TAS1a	miR173-5p:TAS1a	0.00410504
AT2G39675.1	miR173-5p	378	2.5	9.62396	10.624	yes	TAS1c	miR173-5p:TAS1c	0.00410504
AT2G39681.1	miR173-5p	417	2.5	9.47406	6.48569	yes	TAS2	miR173-5p:TAS2	0.00410504
AT4G30080.1	miR160a-5p	1518	2.5	1.71417	1.78246	yes	ARF16	miR160a-5p:ARF16	0.00572438
AT5G60690.1	miR165a-3p	1272	3	1.44897	1.85129	yes	IFL	miR165a-3p:IFL	0.00705188
AT3G42670.1	miR414	943	2.5	0.457369	1.4353	no	CHR38	miR414:CHR38	0.0102277
AT1G27340.1	miR394a	1382	1	0.584202	0.990389	yes	LCR	miR394a:LCR	0.0133886
AT1G27370.4	miR157a-5p	1325	2	1.32214	1.46581	no	SPL10	miR157a-5p:SPL10	0.0136658
AT2G22840.1	miR396a-5p	791	4	2.96329	3.19071	yes	AtGRF1	miR396a-5p:AtGRF1	0.014244
AT3G52910.1	miR396a-5p	752	4	1.71417	2.71417	yes	AtGRF4	miR396a-5p:AtGRF4	0.014244
AT3G23690.1	miR393a-5p	416	3	1.01082	1.80294	yes	NA	miR393a-5p:AT3G23690.1	0.0151987
AT5G06100.3	miR159a	1259	3.5	1.13381	2.13381	yes	ATMYB33	miR159a:ATMYB33	0.0151987
AT2G33810.1	miR156a-5p	796	1.5	1.11844	1.24933	yes	SPL3	miR156a-5p:SPL3	0.0170841
AT2G34710.1	miR165a-3p	880	3	0.418934	1.41893	yes	ATHB-14	miR165a-3p:ATHB-14	0.018207
AT3G62980.1	miR393a-5p	1721	2	0.657227	1.59589	yes	AtTIR1	miR393a-5p:AtTIR1	0.0186126
AT3G57920.1	miR157a-5p	855	2	0.349752	1.33946	no	SPL15	miR157a-5p:SPL15	0.0188455
AT5G07680.2	miR164a	661	2.5	0.365126	1.36513	yes	ANAC079	miR164a:ANAC079	0.0188455
AT1G06180.1	miR858a	402	3	1.03004	2.03004	yes	ATMYB13	miR858a:ATMYB13	0.0203956
AT2G42200.1	miR157a-5p	947	2	0.672601	1.1182	no	AtSPL9	miR157a-5p:AtSPL9	0.0256517
AT3G26810.1	miR393a-5p	2009	4	2.58663	2.22089	yes	AFB2	miR393a-5p:AFB2	0.0377121
AT1G75150.1	miR414	1358	3	0.576515	1.52381	no	NA	miR414:AT1G75150.1	0.0404284
AT5G37780.3	miR414	638	2.5	4.40842	0.979808	no	ACAM-1	miR414:ACAM-1	0.0459356
AT1G48410.3	miR168a-5p	531	5	0.999293	1.99929	yes	AGO1	miR168a-5p:AGO1	0.0510658
AT4G17940.1	miR414	808	2.5	0.276727	0.943211	no	NA	miR414:AT4G17940.1	0.068937
AT1G50055.1	miR173-5p	373	4.5	5.51917	5.16839	yes	TAS1b	miR173-5p:TAS1b	0.0695303
AT1G74410.1	miR162a-3p	619	4.5	1.60271	2.60271	no	NA	miR162a-3p:AT1G74410.1	0.0760809
AT5G13630.2	miR395a	3577	2.5	0.307475	0.657762	no	ABAR	miR395a:ABAR	0.0760809
AT2G34970.1	miR414	2194	2.5	0.330535	0.788243	no	NA	miR414:AT2G34970.1	0.0762896
AT2G23560.1	miR5595a	808	2	0.0153737	0.888958	no	ATMES7	miR5595a:ATMES7	0.0808087
AT5G53660.1	miR396a-5p	539	4	0.568828	1.56883	yes	AtGRF7	miR396a-5p:AtGRF7	0.0820951
AT1G03530.1	miR414	1032	2.5	0.0115303	0.686835	no	ATNAF1	miR414:ATNAF1	0.089595
AT5G54920.2	miR5658	167	3.5	0.418934	1.41893	no	NA	miR5658:AT5G54920.2	0.0983907
AT1G04530.1	miR414	809	2.5	0.0730252	0.534647	no	TPR4	miR414:TPR4	0.109974
AT5G14120.1	miR5021	12	2.5	0.261354	1.26135	no	NA	miR5021:AT5G14120.1	0.111926
AT4G18390.2	miR319a	1136	2.5	0.39203	0.197034	yes	TCP2	miR319a:TCP2	0.117789
AT5G52810.1	miR2938	724	4	0.430465	1.43047	no	NA	miR2938:AT5G52810.1	0.117789
AT1G05562.1	miR865-3p	692	5	0.761	1.761	no	NA	miR865-3p:AT1G05562.1	0.12059
AT1G08125.3	miR390a-3p	887	5	5.1233	2.85423	no	NA	miR390a-3p:AT1G08125.3	0.12365
AT2G47460.1	miR858b	400	2.5	0.330535	0.499411	yes	ATMYB12	miR858b:ATMYB12	0.144059
AT5G12840.4	miR169d	1130	4	0.768687	1.28119	yes	ATHAP2A	miR169d:ATHAP2A	0.144495
AT3G48150.1	miR5654-3p	1804	5.5	0.684131	1.68413	no	APC8	miR5654-3p:APC8	0.145537
AT1G63400.1	miR161.2	999	2	0.357439	0.793344	yes	NA	miR161.2:AT1G63400.1	0.150889
AT2G23610.1	miR5595a	846	3	0.230606	0.987661	no	ATMES3	miR5595a:ATMES3	0.166568
AT1G12920.1	miR856	1359	4	1.33367	1.50597	no	ERF1-2	miR856:ERF1-2	0.177442
AT5G12110.1	miR414	322	3	0.25751	0.872063	no	NA	miR414:AT5G12110.1	0.177977
AT1G53280.1	miR5642a	1320	4.5	2.60969	1.49508	no	AtDJ1B	miR5642a:AtDJ1B	0.191859
AT2G26920.1	miR5641	130	6	0.807121	1.80712	no	NA	miR5641:AT2G26920.1	0.191859
AT1G30330.2	miR167a-5p	3246	5	1.51047	1.65286	no	ARF6	miR167a-5p:ARF6	0.214302
AT1G01160.2	miR837-5p	431	3.5	0.568828	0.966839	no	GIF2	miR837-5p:GIF2	0.232721
AT2G37340.3	miR842	1015	3	0.445838	0.781788	no	AT-RS2Z33	miR842:AT-RS2Z33	0.232721
AT3G49010.5	miR5662	83	3.5	1.85638	0.997315	no	ATBBC1	miR5662:ATBBC1	0.232721
AT1G45145.1	miR837-5p	390	5	3.58592	1.63409	no	ATH5	miR837-5p:ATH5	0.233804
AT4G30600.1	miR5658	2024	2	0.611106	0.589417	no	NA	miR5658:AT4G30600.1	0.254111
AT5G42350.1	miR396a-5p	1642	3.5	0.272884	0.970691	no	NA	miR396a-5p:AT5G42350.1	0.257794
AT3G11440.1	miR159a	1165	3.5	0.372813	1.02291	yes	ATMYB65	miR159a:ATMYB65	0.259145
AT1G51760.1	miR167a-5p	862	3	0.207545	0.758561	no	IAR3	miR167a-5p:IAR3	0.2782
AT1G70320.1	miR414	6400	5	0.64954	1.63696	no	UPL2	miR414:UPL2	0.282252
AT5G41340.1	miR414	697	3	0.188328	0.585372	no	ATUBC4	miR414:ATUBC4	0.29816
AT2G27100.1	miR833b	625	4.5	0.418934	1.41893	no	SE	miR833b:SE	0.313967
AT1G08470.1	miR5661	637	6	1.16072	2.16072	no	SSL3	miR5661:SSL3	0.315936
AT3G01500.3	miR5658	1175	2	0.945485	0.149133	no	ATBCA1	miR5658:ATBCA1	0.315936
AT3G56150.2	miR414	682	3	0.11146	0.606022	no	ATEIF3C-1	miR414:ATEIF3C-1	0.315936
AT4G23680.1	miR5658	557	2	1.16072	0.130614	no	NA	miR5658:AT4G23680.1	0.315936
AT5G42360.1	miR396a-5p	1645	3.5	0.203702	1.01294	no	NA	miR396a-5p:AT5G42360.1	0.315936
AT2G16750.1	miR5021	2149	2	0.0115303	0.651149	no	NA	miR5021:AT2G16750.1	0.316114
AT5G01260.2	miR414	1536	4.5	0.322848	1.32285	no	NA	miR414:AT5G01260.2	0.320247
AT5G46030.1	miR414	453	3	0.25751	0.449315	no	NA	miR414:AT5G46030.1	0.337386
AT3G06540.1	miR156b-3p	1929	5	0.553454	1.55345	no	AthREP	miR156b-3p:AthREP	0.341058
AT2G36390.1	miR414	2567	3.5	0.353596	0.854434	no	BE3	miR414:BE3	0.341104
AT5G24500.1	miR414	796	3.5	0.876303	0.850222	no	NA	miR414:AT5G24500.1	0.342728
AT1G22510.2	miR3440b-3p	296	4	0.24598	1.24598	no	NA	miR3440b-3p:AT1G22510.2	0.346429
AT2G11910.2	miR414	502	3	0.484273	0.355542	no	NA	miR414:AT2G11910.2	0.34672
AT2G16130.1	miR5661	1435	5.5	0.507333	1.50733	no	ATPMT2	miR5661:ATPMT2	0.34672
AT4G37740.1	miR396a-5p	920	4	0.230606	1.23061	yes	AtGRF2	miR396a-5p:AtGRF2	0.347841
AT2G11910.2	miR414	313	3	0.326692	0.304078	no	NA	miR414:AT2G11910.2	0.35329
AT3G16840.1	miR414	472	3.5	0.303631	0.921235	no	NA	miR414:AT3G16840.1	0.364254
AT3G04340.1	miR773b-3p	2282	4.5	0.36897	1.36897	no	emb2458	miR773b-3p:emb2458	0.377098
AT5G33290.1	miR5029	1779	5	0.52655	1.52655	no	XGD1	miR5029:XGD1	0.377098
AT3G09200.2	miR5662	663	3.5	1.41438	0.871045	no	NA	miR5662:AT3G09200.2	0.378464
AT5G28300.1	miR5016	607	3.5	0.334379	0.846411	no	NA	miR5016:AT5G28300.1	0.378464
AT5G44280.2	miR414	351	5.5	1.02235	1.61315	no	ATRING1A	miR414:ATRING1A	0.378464
AT5G58960.3	miR838	235	5.5	0.714879	1.71488	no	GIL1	miR838:GIL1	0.378464
AT3G18790.1	miR5650	335	5.5	1.19146	1.7011	no	NA	miR5650:AT3G18790.1	0.382353
AT1G53230.1	miR319c	1194	3.5	0.25751	0.872063	yes	TCP3	miR319c:TCP3	0.38254
AT5G15850.1	miR847	816	3.5	0.00768687	0.750847	no	ATCOL1	miR847:ATCOL1	0.386986
AT5G63650.1	miR414	1170	3.5	0.261354	0.781049	no	SNRK2-5	miR414:SNRK2-5	0.391901
AT1G20190.1	miR5640	924	5	0.980076	1.50999	no	ATEXP11	miR5640:ATEXP11	0.394201
AT3G50000.1	miR5021	1267	2.5	0.457369	0.762663	no	ATCKA2	miR5021:ATCKA2	0.402753
AT5G43130.2	miR838	1767	4	0.39203	0.986383	no	TAF4	miR838:TAF4	0.402753
AT3G55620.1	miR776	658	4.5	0.822495	1.2879	no	eIF6A	miR776:eIF6A	0.416949
AT5G06340.1	miR5654-5p	298	3	0.422778	0.775768	no	ATNUDX27	miR5654-5p:ATNUDX27	0.41863
AT5G17770.1	miR159b-5p	354	3.5	0.530394	0.829232	no	ATCBR	miR159b-5p:ATCBR	0.419705
AT5G51330.1	miR834	1801	5	0.307475	1.30747	no	DYAD	miR834:DYAD	0.420551
AT5G44200.2	miR414	905	3.5	0.188328	0.723772	no	ATCBP20	miR414:ATCBP20	0.423626
AT5G59000.1	miR414	761	3.5	0.0614949	0.718885	no	NA	miR414:AT5G59000.1	0.425986
AT2G16640.1	miR414	2600	3.5	0.284414	0.700325	no	ATTOC132	miR414:ATTOC132	0.426975
AT5G41770.1	miR829-5p	1968	4.5	1.32983	1.18122	no	NA	miR829-5p:AT5G41770.1	0.426975
AT5G44790.1	miR173-3p	774	5.5	0.568828	1.56883	no	HMA7	miR173-3p:HMA7	0.427544
AT2G33560.2	miR172e-3p	1030	4.5	0.588045	1.259	no	BUBR1	miR172e-3p:BUBR1	0.429321
AT5G37830.1	miR407	1963	4.5	0.276727	1.27673	no	OXP1	miR407:OXP1	0.429321
AT5G64816.2	miR5021	491	2.5	0.280571	0.692425	no	NA	miR5021:AT5G64816.2	0.430773
AT4G02400.1	miR414	336	4.5	0.534237	1.29528	no	NA	miR414:AT4G02400.1	0.434062
AT4G12650.1	miR4227	625	3.5	0.0807121	0.824142	no	NA	miR4227:AT4G12650.1	0.437203
AT3G42790.1	miR414	725	3.5	0.507333	0.698852	no	AL3	miR414:AL3	0.437237
AT1G07470.1	miR414	1112	4	0.0345909	0.971138	no	NA	miR414:AT1G07470.1	0.441076
AT2G17880.1	miR5021	328	3	0.207545	1.01617	no	NA	miR5021:AT2G17880.1	0.46885
AT4G32710.1	miR5012	444	6	0.795591	1.79559	no	PERK14	miR5012:PERK14	0.473603
AT1G12820.1	miR393a-5p	1894	4	0.614949	1.07689	yes	AFB3	miR393a-5p:AFB3	0.480427
AT2G40240.1	miR414	1022	4.5	0.242136	1.24214	no	NA	miR414:AT2G40240.1	0.480427
AT4G18030.1	miR5999	2119	3.5	0.307475	0.54588	no	NA	miR5999:AT4G18030.1	0.480427
AT1G07480.2	miR414	1195	4	0.549611	1.00249	no	NA	miR414:AT1G07480.2	0.481421
AT1G22200.2	miR172b-5p	985	6	1.37979	1.70958	no	NA	miR172b-5p:AT1G22200.2	0.481421
AT1G30630.1	miR780.2	524	5	1.54506	1.34267	no	NA	miR780.2:AT1G30630.1	0.481421
AT2G42760.1	miR413	403	5.5	0.522707	1.52271	no	NA	miR413:AT2G42760.1	0.481421
AT4G31340.2	miR156j	1410	5	1.31445	1.39983	no	NA	miR156j:AT4G31340.2	0.481421
AT5G64020.1	miR5021	384	4	0.315162	1.15531	no	TBL14	miR5021:TBL14	0.485732
AT4G39710.2	miR5021	163	2.5	0.196015	0.604025	no	FKBP16-2	miR5021:FKBP16-2	0.492179
AT2G40300.1	miR5655	886	3.5	0.822495	0.953739	no	ATFER4	miR5655:ATFER4	0.494054
AT1G15020.2	miR840-3p	540	4	0.153737	0.877258	no	ATQSOX1	miR840-3p:ATQSOX1	0.494974
AT1G62150.1	miR156g	292	5	0.272884	1.27288	no	NA	miR156g:AT1G62150.1	0.494974
AT5G17780.2	miR168a-3p	1165	4	0.541924	0.87179	no	NA	miR168a-3p:AT5G17780.2	0.494974
AT2G35690.1	miR2934-3p	1907	4	0.330535	0.85019	no	ACX5	miR2934-3p:ACX5	0.495339
AT3G25520.2	miR414	699	3.5	2.40983	0.454923	no	ATL5	miR414:ATL5	0.496483
AT5G12120.1	miR5012	703	5	0.568828	1.24377	no	NA	miR5012:AT5G12120.1	0.497073
AT3G02880.1	miR5021	2148	3	0.199859	0.948357	no	NA	miR5021:AT3G02880.1	0.499411
AT2G19400.1	miR824-3p	1502	5	0.276727	1.15669	no	NA	miR824-3p:AT2G19400.1	0.509557
AT4G00780.1	miR397b	720	4.5	0.576515	0.964721	no	NA	miR397b:AT4G00780.1	0.518224
AT4G27310.1	miR157a-3p	767	4	0.372813	0.899291	no	BBX28	miR157a-3p:BBX28	0.518609
AT3G54390.1	miR831-3p	921	4.5	0.253667	1	no	NA	miR831-3p:AT3G54390.1	0.518641
AT3G56050.2	miR831-3p	1524	4	0.691818	0.758697	no	NA	miR831-3p:AT3G56050.2	0.533214
AT4G14220.1	miR5021	46	4	0.26904	1.07139	no	RHF1A	miR5021:RHF1A	0.540915
AT1G20696.3	miR5021	727	2.5	0.288258	0.398466	no	HMGB3	miR5021:HMGB3	0.544272
AT1G54520.1	miR5021	496	4	0.595732	1.05865	no	NA	miR5021:AT1G54520.1	0.550485
AT4G09010.1	miR5630a	977	4	0.853242	0.783804	no	APX4	miR5630a:APX4	0.552449
AT1G60700.1	miR3440b-5p	1118	6	0.495803	1.4958	no	NA	miR3440b-5p:AT1G60700.1	0.553538
AT1G06040.2	miR1886.1	706	3.5	0.299788	0.421055	no	BBX24	miR1886.1:BBX24	0.553983
AT2G21390.1	miR5021	79	4	0.253667	1.03819	no	NA	miR5021:AT2G21390.1	0.553983
AT3G21810.1	miR167c-5p	632	5.5	0.687975	1.24703	no	NA	miR167c-5p:AT3G21810.1	0.553983
AT4G35800.1	miR5021	4851	3	0.211389	0.760976	no	NRPB1	miR5021:NRPB1	0.553983
AT5G08139.1	miR4221	1225	5.5	0.284414	1.28441	no	NA	miR4221:AT5G08139.1	0.553983
AT4G27310.1	miR414	624	4	0.199859	0.878936	no	BBX28	miR414:BBX28	0.558776
AT4G33530.1	miR835-3p	964	5.5	0.438151	1.43815	no	KUP5	miR835-3p:KUP5	0.564323
AT1G20950.1	miR5021	51	4	0.0115303	1.01153	no	NA	miR5021:AT1G20950.1	0.573276
AT3G30300.1	miR2938	1954	4	0.157581	0.667541	no	NA	miR2938:AT3G30300.1	0.573276
AT3G55330.1	miR5021	194	4	0.518864	1.01023	no	PPL1	miR5021:PPL1	0.573276
AT4G10430.3	miR5021	470	5.5	0.430465	1.43047	no	NA	miR5021:AT4G10430.3	0.583147
AT2G03240.1	miR414	745	5.5	0.664914	1.26965	no	NA	miR414:AT2G03240.1	0.587017
AT3G23810.1	miR172d-5p	976	3.5	1.33751	0.425546	no	ATSAHH2	miR172d-5p:ATSAHH2	0.587017
AT3G08600.1	miR5658	1225	4	0.572672	0.99032	no	NA	miR5658:AT3G08600.1	0.590164
AT2G35520.2	miR1886.1	270	5	0.764843	1.34981	no	DAD2	miR1886.1:DAD2	0.593478
AT3G51895.1	miR865-5p	1923	3.5	0.192172	0.518543	no	AST12	miR865-5p:AST12	0.593478
AT1G25682.1	miR773a	892	4	0.103773	0.765449	no	NA	miR773a:AT1G25682.1	0.593852
AT3G07390.1	miR5021	227	3	0.399717	0.805389	no	AIR12	miR5021:AIR12	0.593852
AT5G26000.2	miR4227	851	4	1.08385	0.87706	no	AtTGG1	miR4227:AtTGG1	0.593852
AT2G21960.1	miR5021	272	4	0.384343	0.997231	no	NA	miR5021:AT2G21960.1	0.59791
AT2G36400.1	miR396a-5p	756	4	0.153737	0.691375	yes	AtGRF3	miR396a-5p:AtGRF3	0.59791
AT5G15020.2	miR414	3260	5	0.495803	1.12747	no	SNL2	miR414:SNL2	0.59791
AT3G62980.1	miR852	998	4.5	0.161424	0.88053	no	AtTIR1	miR852:AtTIR1	0.598366
AT4G31880.2	miR5595a	735	4.5	0.153737	0.898259	no	NA	miR5595a:AT4G31880.2	0.598366
AT2G41560.1	miR773a	1521	6	0.541924	1.54192	no	ACA4	miR773a:ACA4	0.607284
AT1G75150.1	miR865-3p	255	5.5	0.219076	1.21908	no	NA	miR865-3p:AT1G75150.1	0.613577
AT5G62680.1	miR158a-5p	2178	4.5	0.707192	0.917387	no	GTR2	miR158a-5p:GTR2	0.615681
AT2G23350.1	miR156f-3p	1923	4	0.438151	0.680105	no	PAB4	miR156f-3p:PAB4	0.620644
AT1G27710.2	miR774b-5p	115	5	0.311318	1.09289	no	NA	miR774b-5p:AT1G27710.2	0.621896
AT1G17840.1	miR1886.1	237	5	0.322848	1.32285	no	ABCG11	miR1886.1:ABCG11	0.628896
AT3G01120.1	miR773b-3p	1665	4	0.426621	0.599473	no	AtCGS1	miR773b-3p:AtCGS1	0.630729
AT1G70200.1	miR414	1307	4	0.326692	0.620628	no	NA	miR414:AT1G70200.1	0.634388
AT4G25370.1	miR824-3p	564	4	0.165268	0.55307	no	NA	miR824-3p:AT4G25370.1	0.634388
AT5G55230.2	miR172c	2003	4	0.538081	0.668998	no	ATMAP65-1	miR172c:ATMAP65-1	0.634388
AT5G61790.1	miR414	1023	4	0.165268	0.623599	no	ATCNX1	miR414:ATCNX1	0.634388
AT4G18596.1	miR159b-5p	579	4	0.234449	0.597903	no	NA	miR159b-5p:AT4G18596.1	0.63561
AT1G67080.1	miR167a-5p	303	4	0.115303	0.626498	no	ABA4	miR167a-5p:ABA4	0.63581
AT1G14510.1	miR414	839	4.5	0.461212	0.863693	no	AL7	miR414:AL7	0.640802
AT1G17270.1	miR1886.1	1301	5	0.280571	1.10993	no	NA	miR1886.1:AT1G17270.1	0.640802
AT4G39420.2	miR782	9620	4.5	0.303631	0.928803	no	NA	miR782:AT4G39420.2	0.640802
AT3G43240.1	miR5021	173	5	0.461212	1.1046	no	NA	miR5021:AT3G43240.1	0.640989
AT5G60890.1	miR858a	638	4.5	0.0115303	1.01153	no	ATMYB34	miR858a:ATMYB34	0.66246
AT3G50550.2	miR414	93	4.5	0.388187	0.847484	no	NA	miR414:AT3G50550.2	0.664054
AT2G41870.1	miR858b	605	6	0.342066	1.34207	no	NA	miR858b:AT2G41870.1	0.664928
AT2G17390.1	miR167d	363	4.5	0.292101	0.798188	no	AKR2B	miR167d:AKR2B	0.667373
AT5G02050.1	miR414	500	4.5	0.357439	0.826773	no	NA	miR414:AT5G02050.1	0.676748
AT3G14110.3	miR396b-5p	773	4.5	0.172955	0.806973	no	FLU	miR396b-5p:FLU	0.67719
AT3G51880.4	miR414	542	4	0.188328	0.507537	no	AtHMGB1	miR414:AtHMGB1	0.678049
AT3G52230.1	miR414	512	4	0.280571	0.506217	no	NA	miR414:AT3G52230.1	0.678049
AT5G18800.2	miR5656	140	4.5	0.64954	0.847881	no	NA	miR5656:AT5G18800.2	0.684656
AT2G17970.3	miR847	755	6	0.276727	1.27184	no	NA	miR847:AT2G17970.3	0.6892
AT2G11910.2	miR414	442	4	0.757156	0.4693	no	NA	miR414:AT2G11910.2	0.695434
AT2G32430.1	miR426	591	5.5	0.142207	1.14221	no	NA	miR426:AT2G32430.1	0.699525
AT1G04920.1	miR5021	2994	6	0.403561	1.40356	no	ATSPS3F	miR5021:ATSPS3F	0.700033
AT1G05680.1	miR865-3p	687	5.5	0.461212	1.11758	no	UGT74E2	miR865-3p:UGT74E2	0.707449
AT1G04910.1	miR865-5p	1622	5.5	0.52655	1.09664	no	NA	miR865-5p:AT1G04910.1	0.707759
AT5G16500.1	miR414	1906	4.5	0.0230606	0.789433	no	NA	miR414:AT5G16500.1	0.707759
AT3G49530.1	miR5021	161	5.5	0.757156	1.09065	no	ANAC062	miR5021:ANAC062	0.708595
AT4G23100.3	miR865-3p	462	5.5	0.699505	1.09946	no	ATECS1	miR865-3p:ATECS1	0.708595
AT4G34110.1	miR5021	229	4.5	0.711035	1.17097	no	ATPAB2	miR5021:ATPAB2	0.716875
AT1G09780.1	miR824-3p	1272	4.5	0.157581	0.824746	no	iPGAM1	miR824-3p:iPGAM1	0.724966
AT1G12530.1	miR4239	495	4.5	0.242136	0.740935	no	NA	miR4239:AT1G12530.1	0.728421
AT5G66800.1	miR5021	161	5	0.488116	1.0211	no	NA	miR5021:AT5G66800.1	0.734078
AT4G14340.1	miR5648-5p	1561	6	0.52655	1.13099	no	CKI1	miR5648-5p:CKI1	0.736876
AT3G08520.1	miR831-3p	29	6	3.78578	1.4459	no	NA	miR831-3p:AT3G08520.1	0.736959
AT3G27830.1	miR418	201	4	0.634167	0.637281	no	RPL12	miR418:RPL12	0.741584
AT5G62700.1	miR774a	138	5	0.395874	1.1203	no	TUB3	miR774a:TUB3	0.741584
AT4G32020.1	miR5021	87	4	0.653384	0.997681	no	NA	miR5021:AT4G32020.1	0.745724
AT3G11250.1	miR5662	764	4	0.0538081	0.557076	no	NA	miR5662:AT3G11250.1	0.745863
AT5G65710.1	miR831-3p	2865	5.5	0.265197	1.2652	no	HSL2	miR831-3p:HSL2	0.745863
AT5G40580.3	miR5015	315	5.5	0.530394	1.03644	no	PBB2	miR5015:PBB2	0.747155
AT2G33040.1	miR824-5p	475	5.5	1.38364	1.08011	no	ATP3	miR824-5p:ATP3	0.74808
AT3G44750.2	miR414	472	4.5	0.468899	0.74184	no	ATHD2A	miR414:ATHD2A	0.74808
AT4G31750.1	miR5021	140	5	0.238293	1	no	WIN2	miR5021:WIN2	0.74808
AT1G15690.2	miR414	2086	4	0.415091	0.166435	no	AtAVP1	miR414:AtAVP1	0.753155
AT1G20810.1	miR390a-5p	609	6	0.568828	1.13959	no	NA	miR390a-5p:AT1G20810.1	0.753155
AT1G20980.1	miR831-5p	3804	4.5	0.288258	0.811223	no	ATSPL14	miR831-5p:ATSPL14	0.753155
AT1G28240.1	miR399c-5p	1432	6	0.495803	1.14404	no	NA	miR399c-5p:AT1G28240.1	0.753155
AT1G35310.1	miR414	288	4.5	1.15303	0.724516	no	MLP168	miR414:MLP168	0.753155
AT1G71500.1	miR5021	313	6	0.768687	1.13016	no	NA	miR5021:AT1G71500.1	0.753155
AT1G76810.1	miR158a-5p	4352	5	0.342066	0.916052	no	NA	miR158a-5p:AT1G76810.1	0.753628
AT5G57370.1	miR414	572	4.5	0.169111	0.707102	no	NA	miR414:AT5G57370.1	0.768751
AT3G11120.1	miR831-3p	105	5	4.58906	1.04378	no	NA	miR831-3p:AT3G11120.1	0.773452
AT3G57870.1	miR172b-5p	207	4	0.230606	0.567518	no	AHUS5	miR172b-5p:AHUS5	0.773452
AT5G06430.1	miR774b-5p	608	6	0.326692	1.32669	no	NA	miR774b-5p:AT5G06430.1	0.773452
AT3G53610.3	miR172c	589	4.5	0.176798	0.838437	no	ATRAB8	miR172c:ATRAB8	0.778502
AT1G16300.1	miR858b	461	6	0.353596	1.20535	no	GAPCP-2	miR858b:GAPCP-2	0.782728
AT5G22080.2	miR158a-5p	762	5	0.857086	0.887904	no	NA	miR158a-5p:AT5G22080.2	0.782728
AT1G19660.2	miR414	506	6	0.822495	1.33129	no	NA	miR414:AT1G19660.2	0.792948
AT5G65930.3	miR393a-3p	3734	6	0.549611	1.1613	no	KCBP	miR393a-3p:KCBP	0.795786
AT3G10420.2	miR414	1478	5	0.553454	0.884073	no	SPD1	miR414:SPD1	0.797015
AT3G13460.4	miR5021	84	4.5	0.307475	0.854339	no	ECT2	miR5021:ECT2	0.797015
AT3G53630.1	miR838	560	4.5	0.00768687	0.6519	no	NA	miR838:AT3G53630.1	0.797015
AT4G36140.1	miR775	2798	6	0.130677	1.13068	no	NA	miR775:AT4G36140.1	0.797015
AT5G23940.1	miR3440b-3p	713	4.5	0.764843	0.675088	no	DCR	miR3440b-3p:DCR	0.797015
AT1G70700.2	miR5021	98	4	0.307475	0.759028	no	JAZ9	miR5021:JAZ9	0.805272
AT2G18400.1	miR831-5p	463	4.5	0.388187	0.900295	no	NA	miR831-5p:AT2G18400.1	0.806912
AT1G30530.1	miR773b-3p	1144	4.5	0.288258	0.55754	no	UGT78D1	miR773b-3p:UGT78D1	0.816041
AT1G52342.1	miR5021	304	4	0.299788	0.74624	no	NA	miR5021:AT1G52342.1	0.816041
AT2G19800.1	miR407	797	5.5	0.334379	1.00289	no	MIOX2	miR407:MIOX2	0.816041
AT4G32410.1	miR831-3p	1654	6	0.457369	1.12791	no	AtCESA1	miR831-3p:AtCESA1	0.816041
AT5G03455.1	miR5646	290	5	0.192172	0.813739	no	ACR2	miR5646:ACR2	0.816041
AT5G16500.1	miR847	1913	5.5	0.272884	0.982206	no	NA	miR847:AT5G16500.1	0.816041
AT5G25900.1	miR854a	109	5.5	0.0153737	1.01537	no	ATKO1	miR854a:ATKO1	0.816041
AT1G07920.1	miR414	1280	4.5	1.04926	0.565903	no	NA	miR414:AT1G07920.1	0.82036
AT1G22640.1	miR858a	394	5	0.634167	0.825305	no	ATMYB3	miR858a:ATMYB3	0.82036
AT1G64090.2	miR5658	1173	6	2.82492	1.097	no	RTNLB3	miR5658:RTNLB3	0.82036
AT1G65230.1	miR5640	883	5.5	0.549611	0.978165	no	NA	miR5640:AT1G65230.1	0.82036
AT1G80040.3	miR5021	142	4	0.00384343	0.709384	no	NA	miR5021:AT1G80040.3	0.82036
AT2G03470.2	miR414	1122	4.5	0.0345909	0.573728	no	NA	miR414:AT2G03470.2	0.82036
AT2G35240.1	miR5662	108	6	0.561141	1.05179	no	MORF6	miR5662:MORF6	0.82036
AT2G45980.1	miR156b-3p	783	5	0.326692	0.784181	no	ATI1	miR156b-3p:ATI1	0.82036
AT3G56020.1	miR831-3p	71	6	16.0386	1.1183	no	NA	miR831-3p:AT3G56020.1	0.82036
AT4G26710.2	miR413	445	5	0.726409	0.823912	no	NA	miR413:AT4G26710.2	0.82036
AT5G24930.1	miR847	1463	4.5	0.230606	0.507276	no	ATCOL4	miR847:ATCOL4	0.82036
AT5G66240.3	miR777	252	6	0.388187	1.08079	no	NA	miR777:AT5G66240.3	0.82036
AT1G56460.2	miR414	1206	5.5	0.399717	1.19725	no	NA	miR414:AT1G56460.2	0.823237
AT2G16920.1	miR414	1998	5	0.272884	0.821422	no	PFU2	miR414:PFU2	0.825876
AT1G42550.1	miR414	1483	5.5	0.349752	1.18971	no	PMI1	miR414:PMI1	0.826441
AT2G42100.1	miR833a-5p	1093	6	0.322848	1.32285	no	NA	miR833a-5p:AT2G42100.1	0.829211
AT1G48750.1	miR5658	469	4	0.668757	0.150854	no	NA	miR5658:AT1G48750.1	0.831433
AT3G56990.1	miR414	2048	5.5	0.342066	0.985883	no	EDA7	miR414:EDA7	0.831433
AT3G01500.3	miR5658	1200	4	0.372813	0.105234	no	ATBCA1	miR5658:ATBCA1	0.834002
AT4G33890.2	miR830-5p	1153	5.5	0.138364	0.951797	no	NA	miR830-5p:AT4G33890.2	0.834002
AT3G09980.1	miR5021	909	6	0.299788	1.27049	no	NA	miR5021:AT3G09980.1	0.840741
AT1G07940.2	miR414	1411	4.5	1.50663	0.494385	no	NA	miR414:AT1G07940.2	0.842518
AT1G14000.1	miR5021	1676	4.5	0.361283	0.776406	no	VIK	miR5021:VIK	0.842518
AT1G17130.2	miR414	1116	4.5	0.13452	0.506159	no	NA	miR414:AT1G17130.2	0.842518
AT2G17110.1	miR414	961	5.5	0.142207	0.967446	no	NA	miR414:AT2G17110.1	0.842518
AT2G33585.1	miR394a	370	6	0.595732	1.05327	no	NA	miR394a:AT2G33585.1	0.842518
AT3G29075.1	miR414	714	4.5	0.13452	0.492644	no	NA	miR414:AT3G29075.1	0.842518
AT4G32040.1	miR1886.3	877	5.5	0.530394	1	no	KNAT5	miR1886.3:KNAT5	0.842518
AT5G22650.2	miR414	587	4.5	0.172955	0.503451	no	ATHD2	miR414:ATHD2	0.842518
AT5G26710.1	miR414	2123	5	0.295944	0.798666	no	NA	miR414:AT5G26710.1	0.842518
ATCG01250.1	miR167a-3p	677	4.5	0.13452	0.448482	no	NDHB.2	miR167a-3p:NDHB.2	0.842518
AT1G54030.1	miR5021	173	5	0.203702	0.874366	no	ERMO3	miR5021:ERMO3	0.846811
AT3G05510.2	miR868-3p	937	5	0.165268	0.767197	no	NA	miR868-3p:AT3G05510.2	0.846811
ATCG00890.1	miR167a-3p	677	4.5	0.0845555	0.434006	no	NDHB.1	miR167a-3p:NDHB.1	0.846811
AT1G07930.2	miR414	1061	4.5	0.903207	0.453388	no	NA	miR414:AT1G07930.2	0.859256
AT1G64040.1	miR5021	1344	5	0.261354	0.863225	no	TOPP3	miR5021:TOPP3	0.859595
AT4G36910.1	miR5654-5p	633	6	0.953172	1.00994	no	CBSX1	miR5654-5p:CBSX1	0.869058
AT5G01500.1	miR834	1025	5.5	0.199859	0.901787	no	TAAC	miR834:TAAC	0.869058
AT1G62500.1	miR161.2	778	5	0.338222	0.974803	no	NA	miR161.2:AT1G62500.1	0.869548
AT5G52060.1	miR5021	1628	4	0.411247	0.85554	no	ATBAG1	miR5021:ATBAG1	0.869548
AT2G34790.1	miR839-5p	1550	5	0.472742	0.775387	no	EDA28	miR839-5p:EDA28	0.872274
AT1G12520.3	miR398a-3p	820	6	1.04157	1.0095	no	ATCCS	miR398a-3p:ATCCS	0.875426
AT1G77090.1	miR157a-3p	321	6	0.303631	1.03985	no	NA	miR157a-3p:AT1G77090.1	0.875532
AT1G22380.1	miR157a-3p	1302	6	0.64954	1.03124	no	AtUGT85A3	miR157a-3p:AtUGT85A3	0.879256
AT1G23240.3	miR5021	569	3.5	0.541924	0.200273	no	NA	miR5021:AT1G23240.3	0.879256
AT3G61310.1	miR167c-5p	1216	5.5	0.207545	0.877157	no	NA	miR167c-5p:AT3G61310.1	0.879256
AT5G22650.2	miR414	638	5	0.853242	0.7439	no	ATHD2	miR414:ATHD2	0.879256
AT5G65390.1	miR8181	234	5	0.157581	0.720219	no	AGP7	miR8181:AGP7	0.879256
AT1G31335.1	miR5021	109	4.5	0.303631	0.726018	no	NA	miR5021:AT1G31335.1	0.880429
AT3G62900.1	miR414	2839	5	0.0807121	0.936706	no	NA	miR414:AT3G62900.1	0.880655
AT1G02500.2	miR858b	966	5	0.445838	0.66208	no	AtSAM1	miR858b:AtSAM1	0.882384
AT1G29930.1	miR842	223	4.5	1.22221	0.319053	no	AB140	miR842:AB140	0.882384
AT1G62430.1	miR5652	1233	6	0.234449	1.01581	no	ATCDS1	miR5652:ATCDS1	0.882384
AT1G72750.1	miR5996	445	6	0.62648	0.959201	no	ATTIM23-2	miR5996:ATTIM23-2	0.882384
AT2G36580.1	miR169f-3p	1402	6	0.507333	0.972717	no	NA	miR169f-3p:AT2G36580.1	0.882384
AT3G16640.1	miR414	276	4.5	0.307475	0.29628	no	TCTP	miR414:TCTP	0.882384
AT3G19580.2	miR5641	144	6	0.165268	0.986979	no	AZF2	miR5641:AZF2	0.882384
AT3G58690.1	miR396a-5p	777	5.5	0.0922424	0.893144	no	NA	miR396a-5p:AT3G58690.1	0.882384
AT4G02450.2	miR414	735	4.5	0.568828	0.263483	no	NA	miR414:AT4G02450.2	0.882384
AT5G13810.1	miR5640	472	6	0.161424	1.02026	no	NA	miR5640:AT5G13810.1	0.882384
AT5G35680.3	miR414	514	4.5	0.857086	0.280402	no	NA	miR414:AT5G35680.3	0.882384
AT5G42530.1	miR5021	97	4	0.0922424	0.599312	no	NA	miR5021:AT5G42530.1	0.882384
AT4G27640.1	miR5021	3345	4	0.088399	0.571876	no	NA	miR5021:AT4G27640.1	0.887486
AT2G20630.2	miR5662	391	6	0.345909	0.964205	no	PIA1	miR5662:PIA1	0.891269
AT3G55620.1	miR5021	87	4	0.234449	0.562312	no	eIF6A	miR5021:eIF6A	0.892924
AT4G10030.1	miR831-3p	812	6	0.530394	0.997495	no	NA	miR831-3p:AT4G10030.1	0.892924
AT5G62690.1	miR774a	179	5	0.238293	0.679449	no	TUB2	miR774a:TUB2	0.899992
AT5G09550.1	miR824-3p	520	5.5	0.169111	0.849239	no	GDI	miR824-3p:GDI	0.900971
AT3G26640.1	miR5662	1029	5.5	0.376657	1.06544	no	LWD2	miR5662:LWD2	0.902716
AT3G56260.2	miR831-3p	768	5	0.684131	0.648024	no	NA	miR831-3p:AT3G56260.2	0.903363
AT4G02990.1	miR172a	947	6	0.484273	0.953108	no	BSM	miR172a:BSM	0.903363
AT5G07090.2	miR5640	976	4.5	0.345909	0.321215	no	NA	miR5640:AT5G07090.2	0.903363
AT1G55330.1	miR414	96	4.5	0.426621	0.0614422	no	AGP21	miR414:AGP21	0.90433
AT5G06150.1	miR829-5p	1048	5	0.138364	0.683737	no	CYC1BAT	miR829-5p:CYC1BAT	0.90433
AT2G17500.4	miR844-5p	1417	5.5	0.36897	0.862047	no	NA	miR844-5p:AT2G17500.4	0.905901
AT3G46530.1	miR414	1457	5	0.215232	0.666796	no	RPP13	miR414:RPP13	0.905901
AT1G28960.5	miR859	781	5	0.580359	0.639293	no	ATNUDT15	miR859:ATNUDT15	0.917943
AT3G02360.2	miR859	1605	5	1.1146	0.847501	no	NA	miR859:AT3G02360.2	0.92409
AT3G24080.2	miR780.2	1336	5	0.142207	0.804975	no	NA	miR780.2:AT3G24080.2	0.92409
AT4G04960.1	miR5638a	1995	6	0.196015	1.19602	no	NA	miR5638a:AT4G04960.1	0.92409
AT4G10710.1	miR414	3172	5	0.726409	0.834631	no	SPT16	miR414:SPT16	0.92409
AT4G25640.2	miR854a	478	5	0.3805	0.922916	no	ATDTX35	miR854a:ATDTX35	0.92409
AT4G27270.1	miR858a	578	5.5	0.430465	1.03909	no	NA	miR858a:AT4G27270.1	0.92409
AT5G43760.1	miR854a	313	5.5	0.36897	1.05635	no	KCS20	miR854a:KCS20	0.92409
AT1G01300.1	miR5021	169	6	0.52655	0.910588	no	NA	miR5021:AT1G01300.1	0.926642
AT1G21630.2	miR5652	3851	5.5	0.242136	0.839038	no	NA	miR5652:AT1G21630.2	0.926642
AT1G31650.1	miR1886.3	1443	6	0.307475	1.00295	no	ATROPGEF14	miR1886.3:ATROPGEF14	0.926642
AT3G02770.1	miR5642a	395	5	0.276727	0.620692	no	NA	miR5642a:AT3G02770.1	0.926642
AT1G01630.1	miR8171	978	6	1.52584	1.08593	no	NA	miR8171:AT1G01630.1	0.93109
AT1G47970.1	miR414	263	5	0.303631	0.743524	no	NA	miR414:AT1G47970.1	0.93109
AT1G54030.1	miR4240	690	5.5	0.253667	0.993906	no	ERMO3	miR4240:ERMO3	0.93109
AT1G54570.1	miR829-5p	1250	6	0.36897	1.17481	no	PES1	miR829-5p:PES1	0.93109
AT1G75270.1	miR832-3p	731	5	0.345909	0.767638	no	DHAR2	miR832-3p:DHAR2	0.93109
AT2G02220.1	miR5021	3136	6	0.0807121	1.08071	no	ATPSKR1	miR5021:ATPSKR1	0.93109
AT2G15270.1	miR5630a	665	5	0.338222	0.773426	no	NA	miR5630a:AT2G15270.1	0.93109
AT2G32235.1	miR5658	1945	5	0.230606	0.8185	no	NA	miR5658:AT2G32235.1	0.93109
AT4G02600.2	miR829-5p	1722	6	0.388187	1.14232	no	ATMLO1	miR829-5p:ATMLO1	0.93109
AT4G17950.1	miR4221	1390	5.5	0.726409	0.978222	no	NA	miR4221:AT4G17950.1	0.93109
AT4G37980.2	miR5012	810	5	0.226763	0.801599	no	ATCAD7	miR5012:ATCAD7	0.93109
AT4G38660.2	miR842	966	5	0.553454	0.81623	no	NA	miR842:AT4G38660.2	0.93109
AT5G01530.1	miR5662	896	5.5	7.54466	0.977145	no	LHCB4.1	miR5662:LHCB4.1	0.93109
AT5G45110.1	miR5021	2132	6	0.342066	1.12211	no	ATNPR3	miR5021:ATNPR3	0.93109
AT5G59250.1	miR5640	1634	5	0.149894	0.78902	no	NA	miR5640:AT5G59250.1	0.93109
AT1G18740.1	miR5662	1041	5.5	0.272884	0.803486	no	NA	miR5662:AT1G18740.1	0.935386
AT5G58250.1	miR4245	718	5	1.03004	0.671832	no	EMB3143	miR4245:EMB3143	0.935386
AT1G20693.3	miR390a-3p	589	5.5	1.50278	0.914348	no	HMG BETA 1	miR390a-3p:HMG BETA 1	0.94249
AT4G23490.1	miR164c-3p	1848	6	0.357439	1.08277	no	NA	miR164c-3p:AT4G23490.1	0.94249
AT1G44780.2	miR838	1381	5	0.611106	0.596123	no	NA	miR838:AT1G44780.2	0.947412
AT5G47820.2	miR158a-3p	3254	5	0.445838	0.725966	no	FRA1	miR158a-3p:FRA1	0.947412
AT1G10200.1	miR394a	660	5	0.476586	0.589978	no	WLIM1	miR394a:WLIM1	0.94792
AT3G06430.1	miR403-3p	1533	5	0.334379	0.62199	no	AtPPR2	miR403-3p:AtPPR2	0.94792
AT4G24280.1	miR840-3p	1194	5	0.249823	0.570315	no	cpHsc70-1	miR840-3p:cpHsc70-1	0.94792
AT3G51420.1	miR5996	1469	6	0.276727	1.05394	no	ATSSL4	miR5996:ATSSL4	0.949041
AT3G19820.3	miR397b	1251	5.5	1.14534	0.911789	no	CBB1	miR397b:CBB1	0.951889
AT4G22580.1	miR167a-3p	924	6	0.349752	1.11422	no	NA	miR167a-3p:AT4G22580.1	0.951889
AT4G00170.1	miR399b	557	6	0.188328	0.90356	no	NA	miR399b:AT4G00170.1	0.954228
AT4G20440.4	miR5633	960	6	0.49196	1.06884	no	smB	miR5633:smB	0.955125
AT3G55605.1	miR414	472	5.5	0.353596	0.794668	no	NA	miR414:AT3G55605.1	0.956977
AT1G50490.1	miR159b-5p	640	6	0.468899	1.03521	no	UBC20	miR159b-5p:UBC20	0.965094
AT2G01720.1	miR403-3p	849	6	0.188328	1.06548	no	NA	miR403-3p:AT2G01720.1	0.965094
AT1G10670.4	miR162a-5p	939	5.5	0.472742	0.832675	no	ACLA-1	miR162a-5p:ACLA-1	0.967608
AT1G31580.1	miR5021	173	4	0.488116	0.36555	no	CXC750	miR5021:CXC750	0.967799
AT5G39500.1	miR861-5p	2998	6	0.430465	1.0845	no	ERMO1	miR861-5p:ERMO1	0.974728
AT1G77810.2	miR5024-5p	1364	6	0.24598	0.87811	no	NA	miR5024-5p:AT1G77810.2	0.978674
AT3G16350.1	miR397a	1208	5.5	0.330535	0.752273	no	NA	miR397a:AT3G16350.1	0.97908
AT1G20330.1	miR831-3p	739	5	0.987763	0.455595	no	CVP1	miR831-3p:CVP1	0.979639
AT2G02090.1	miR5021	2472	5	0.24598	0.820337	no	CHA19	miR5021:CHA19	0.984557
AT3G13750.1	miR8181	2633	6	0.599576	0.892747	no	BGAL1	miR8181:BGAL1	0.984769
AT5G12250.1	miR774a	171	6	0.787904	0.887443	no	TUB6	miR774a:TUB6	0.984769
AT5G22210.2	miR831-3p	115	5	0.188328	0.441575	no	NA	miR831-3p:AT5G22210.2	0.984769
AT3G23810.1	miR5021	1697	4	0.661071	0.28694	no	ATSAHH2	miR5021:ATSAHH2	0.996905
AT3G51260.2	miR5662	133	5.5	0.153737	0.842777	no	PAD1	miR5662:PAD1	0.996905
AT1G01610.1	miR774b-5p	330	5.5	0.192172	0.813739	no	ATGPAT4	miR774b-5p:ATGPAT4	0.999919
AT1G01800.2	miR171c-5p	925	5.5	0.388187	0.580511	no	NA	miR171c-5p:AT1G01800.2	0.999919
AT1G02205.3	miR774b-3p	1614	6	0.334379	0.56805	no	CER1	miR774b-3p:CER1	0.999919
AT1G02305.1	miR5014b	956	6	0.196015	0.633539	no	NA	miR5014b:AT1G02305.1	0.999919
AT1G04340.1	miR172d-5p	483	6	0.11146	0.669123	no	NA	miR172d-5p:AT1G04340.1	0.999919
AT1G04410.1	miR171c-5p	666	6	0.499646	0.50076	no	c-NAD-MDH1	miR171c-5p:c-NAD-MDH1	0.999919
AT1G06760.1	miR834	682	6	0.353596	0.480349	no	NA	miR834:AT1G06760.1	0.999919
AT1G07320.4	miR1886.1	100	6	0.284414	0.557733	no	EMB2784	miR1886.1:EMB2784	0.999919
AT1G07920.1	miR861-5p	491	6	0.130677	0.761772	no	NA	miR861-5p:AT1G07920.1	0.999919
AT1G07930.2	miR861-5p	503	6	0.0384343	0.587122	no	NA	miR861-5p:AT1G07930.2	0.999919
AT1G07940.2	miR861-5p	622	6	0.372813	0.866564	no	NA	miR861-5p:AT1G07940.2	0.999919
AT1G09200.1	miR4221	102	6	1.06847	0.646712	no	NA	miR4221:AT1G09200.1	0.999919
AT1G10120.1	miR396a-5p	1316	5.5	0.130677	0.823621	yes	NA	miR396a-5p:AT1G10120.1	0.999919
AT1G10630.1	miR866-5p	325	6	0.115303	0.640323	no	ARFA1F	miR866-5p:ARFA1F	0.999919
AT1G10840.2	miR837-5p	811	6	0.480429	0.444691	no	TIF3H1	miR837-5p:TIF3H1	0.999919
AT1G10950.1	miR5024-5p	1797	5.5	0.607263	0.819673	no	AtTMN1	miR5024-5p:AtTMN1	0.999919
AT1G12080.2	miR4221	353	5.5	0.699505	0.199255	no	NA	miR4221:AT1G12080.2	0.999919
AT1G12080.2	miR838	461	5.5	0.853242	0.202583	no	NA	miR838:AT1G12080.2	0.999919
AT1G14320.2	miR447c-3p	453	6	0.826338	0.305352	no	RPL10	miR447c-3p:RPL10	0.999919
AT1G16900.1	miR865-3p	1901	6	0.142207	0.841443	no	EBS3	miR865-3p:EBS3	0.999919
AT1G17745.2	miR839-5p	1917	6	0.910894	0.458157	no	PGDH	miR839-5p:PGDH	0.999919
AT1G18490.1	miR160c-3p	1219	6	0.26904	0.774745	no	NA	miR160c-3p:AT1G18490.1	0.999919
AT1G20010.1	miR847	1426	5	0.584202	0.171444	no	TUB5	miR847:TUB5	0.999919
AT1G20260.1	miR859	1238	6	0.284414	0.606302	no	AtVAB3	miR859:AtVAB3	0.999919
AT1G20693.3	miR414	583	5.5	0.261354	0.309262	no	HMG BETA 1	miR414:HMG BETA 1	0.999919
AT1G20950.1	miR822-5p	244	6	0.088399	0.810988	no	NA	miR822-5p:AT1G20950.1	0.999919
AT1G22400.1	miR157a-3p	1371	6	0.14605	0.772129	no	ATUGT85A1	miR157a-3p:ATUGT85A1	0.999919
AT1G22640.1	miR164c-3p	613	6	0.395874	0.804958	no	ATMYB3	miR164c-3p:ATMYB3	0.999919
AT1G24260.3	miR398a-5p	743	6	0.77253	0.45972	no	AGL9	miR398a-5p:AGL9	0.999919
AT1G27400.1	miR773a	591	5	1.0531	0.340856	no	NA	miR773a:AT1G27400.1	0.999919
AT1G27710.2	miR170-3p	661	6	0.126833	0.310844	no	NA	miR170-3p:AT1G27710.2	0.999919
AT1G30230.2	miR5665	662	6	0.299788	0.247358	no	eEF-1Bb1	miR5665:eEF-1Bb1	0.999919
AT1G30230.2	miR5021	834	5	0.334379	0.311604	no	eEF-1Bb1	miR5021:eEF-1Bb1	0.999919
AT1G36310.2	miR831-3p	990	5	0.211389	0.178051	no	NA	miR831-3p:AT1G36310.2	0.999919
AT1G45688.2	miR1886.1	740	6	0.353596	0.780577	no	NA	miR1886.1:AT1G45688.2	0.999919
AT1G49760.2	miR8183	2090	5	0.411247	0.192325	no	PAB8	miR8183:PAB8	0.999919
AT1G50010.1	miR5641	96	6	0.253667	0.704221	no	TUA2	miR5641:TUA2	0.999919
AT1G51950.1	miR414	518	6	0.14605	0.719931	no	IAA18	miR414:IAA18	0.999919
AT1G52300.1	miR778	330	6	0.319005	0.139666	no	NA	miR778:AT1G52300.1	0.999919
AT1G52600.1	miR868-5p	592	5.5	0.711035	0.51396	no	NA	miR868-5p:AT1G52600.1	0.999919
AT1G53910.3	miR396a-5p	591	6	0.142207	0.564792	no	RAP2.12	miR396a-5p:RAP2.12	0.999919
AT1G54710.1	miR414	3033	6	0.51502	0.822615	no	ATATG18H	miR414:ATATG18H	0.999919
AT1G55670.1	miR157d	654	5.5	0.196015	0.177092	no	PSAG	miR157d:PSAG	0.999919
AT1G55805.1	miR858a	313	6	0.595732	0.845272	no	NA	miR858a:AT1G55805.1	0.999919
AT1G60950.1	miR773b-3p	423	5.5	1.74876	0.0872581	no	ATFD2	miR773b-3p:ATFD2	0.999919
AT1G62750.1	miR842	2095	5	0.376657	0.434066	no	ATSCO1	miR842:ATSCO1	0.999919
AT1G64090.2	miR5021	412	5	0.449682	0.65236	no	RTNLB3	miR5021:RTNLB3	0.999919
AT1G64520.1	miR156i	907	6	0.480429	0.77786	no	RPN12a	miR156i:RPN12a	0.999919
AT1G64650.2	miR408-5p	636	6	0.353596	0.943728	no	NA	miR408-5p:AT1G64650.2	0.999919
AT1G65295.1	miR854a	115	5	0.25751	0.312143	no	NA	miR854a:AT1G65295.1	0.999919
AT1G66260.2	miR394a	983	5.5	0.215232	0.399634	no	NA	miR394a:AT1G66260.2	0.999919
AT1G66580.1	miR158a-5p	795	5	0.480429	0.380548	no	RPL10C	miR158a-5p:RPL10C	0.999919
AT1G67350.2	miR854a	355	5	0.222919	0.444276	no	NA	miR854a:AT1G67350.2	0.999919
AT1G68300.1	miR2939	621	6	0.184485	0.437648	no	NA	miR2939:AT1G68300.1	0.999919
AT1G68560.1	miR5021	118	6	0.276727	0.435832	no	ATXYL1	miR5021:ATXYL1	0.999919
AT1G70490.3	miR866-5p	435	6	1.18762	0.665569	no	ARFA1D	miR866-5p:ARFA1D	0.999919
AT1G72020.1	miR5651	278	6	1.87175	0.228903	no	NA	miR5651:AT1G72020.1	0.999919
AT1G72230.1	miR408-3p	823	6	0.272884	0.795763	no	NA	miR408-3p:AT1G72230.1	0.999919
AT1G74060.1	miR835-3p	810	5.5	0.13452	0.29337	no	NA	miR835-3p:AT1G74060.1	0.999919
AT1G75380.3	miR414	477	6	0.299788	0.816507	no	ATBBD1	miR414:ATBBD1	0.999919
AT1G75500.2	miR868-3p	1230	6	0.284414	0.66151	no	UMAMIT5	miR868-3p:UMAMIT5	0.999919
AT1G76550.1	miR5020c	1903	5.5	0.11146	0.375474	no	NA	miR5020c:AT1G76550.1	0.999919
AT1G78040.2	miR415	511	4.5	1.13381	0.167265	no	NA	miR415:AT1G78040.2	0.999919
AT2G01490.1	miR5655	1039	6	0.211389	0.568735	no	PAHX	miR5655:PAHX	0.999919
AT2G01970.1	miR156i	1804	5	0.176798	0.508457	no	NA	miR156i:AT2G01970.1	0.999919
AT2G02160.1	miR838	1952	6	0.311318	0.768114	no	NA	miR838:AT2G02160.1	0.999919
AT2G04030.2	miR156d-3p	1007	6	0.180641	0.79338	no	AtHsp90.5	miR156d-3p:AtHsp90.5	0.999919
AT2G04570.1	miR774b-3p	984	6	1.4067	0.455016	no	NA	miR774b-3p:AT2G04570.1	0.999919
AT2G07698.1	miR867	1295	6	1.5489	0.214679	no	NA	miR867:AT2G07698.1	0.999919
AT2G10940.2	miR862-5p	726	6	1.79104	0.374479	no	NA	miR862-5p:AT2G10940.2	0.999919
AT2G13360.2	miR5021	1381	5.5	0.584202	0.189059	no	AGT	miR5021:AGT	0.999919
AT2G13820.2	miR156i	283	6	0.353596	0.758716	no	AtXYP2	miR156i:AtXYP2	0.999919
AT2G16600.2	miR414	538	5.5	1.49125	0.148659	no	ROC3	miR414:ROC3	0.999919
AT2G19730.3	miR8168	455	6	0.292101	0.141302	no	NA	miR8168:AT2G19730.3	0.999919
AT2G20260.1	miR834	241	6	0.641853	0.376644	no	PSAE-2	miR834:PSAE-2	0.999919
AT2G20280.1	miR774b-3p	402	6	0.357439	0.815321	no	NA	miR774b-3p:AT2G20280.1	0.999919
AT2G20890.1	miR838	906	5.5	0.472742	0.523344	no	PSB29	miR838:PSB29	0.999919
AT2G22230.1	miR3434-3p	667	6	0.876303	0.576925	no	NA	miR3434-3p:AT2G22230.1	0.999919
AT2G22795.1	miR831-3p	206	5.5	0.234449	0.661984	no	NA	miR831-3p:AT2G22795.1	0.999919
AT2G22795.1	miR4221	656	6	0.199859	0.521016	no	NA	miR4221:AT2G22795.1	0.999919
AT2G22795.1	miR4221	722	6	0.184485	0.493739	no	NA	miR4221:AT2G22795.1	0.999919
AT2G23350.1	miR854a	2192	5.5	0.349752	0.640631	no	PAB4	miR854a:PAB4	0.999919
AT2G23940.1	miR396b-5p	664	5.5	0.338222	0.452666	no	NA	miR396b-5p:AT2G23940.1	0.999919
AT2G24360.1	miR5664	1581	6	0.188328	0.654795	no	NA	miR5664:AT2G24360.1	0.999919
AT2G26100.1	miR866-3p	1142	6	0.342066	0.775648	no	NA	miR866-3p:AT2G26100.1	0.999919
AT2G29550.1	miR8167a	891	5.5	0.0768687	0.487969	no	TUB7	miR8167a:TUB7	0.999919
AT2G29700.1	miR831-3p	205	6	0.353596	0.98877	no	ATPH1	miR831-3p:ATPH1	0.999919
AT2G30110.1	miR414	3313	5	0.372813	0.462563	no	ATUBA1	miR414:ATUBA1	0.999919
AT2G32060.3	miR5666	435	5.5	1.56812	0.361731	no	NA	miR5666:AT2G32060.3	0.999919
AT2G32260.1	miR414	1042	6	0.407404	0.764182	no	ATCCT1	miR414:ATCCT1	0.999919
AT2G33120.3	miR824-3p	577	5.5	0.580359	0.633385	no	ATVAMP722	miR824-3p:ATVAMP722	0.999919
AT2G33800.1	miR3434-5p	760	6	0.288258	0.290408	no	EMB3113	miR3434-5p:EMB3113	0.999919
AT2G35490.1	miR865-3p	476	6	0.407404	0.912758	no	NA	miR865-3p:AT2G35490.1	0.999919
AT2G37110.1	miR5014a-5p	463	6	0.461212	0.801765	no	NA	miR5014a-5p:AT2G37110.1	0.999919
AT2G37400.1	miR838	729	6	0.311318	0.966024	no	NA	miR838:AT2G37400.1	0.999919
AT2G39730.3	miR863-5p	420	6	0.234449	0.423065	no	RCA	miR863-5p:RCA	0.999919
AT2G41620.1	miR169b-3p	1886	6	0.24598	0.729842	no	NA	miR169b-3p:AT2G41620.1	0.999919
AT2G43560.1	miR773a	631	5	0.199859	0.30965	no	NA	miR773a:AT2G43560.1	0.999919
AT2G43710.2	miR5632-5p	1274	6	0.307475	0.49504	no	FAB2	miR5632-5p:FAB2	0.999919
AT2G44730.1	miR414	861	6	0.395874	0.848196	no	NA	miR414:AT2G44730.1	0.999919
AT2G46020.2	miR166a-3p	6330	5.5	0.376657	0.76505	no	ATBRM	miR166a-3p:ATBRM	0.999919
AT2G47110.2	miR838	303	6	0.741783	0.489832	no	UBI6	miR838:UBI6	0.999919
AT3G01120.1	miR8177	1768	6	1.09922	0.553836	no	AtCGS1	miR8177:AtCGS1	0.999919
AT3G01390.2	miR837-5p	470	5.5	0.365126	0.140657	no	AVMA10	miR837-5p:AVMA10	0.999919
AT3G01500.3	miR5024-3p	748	6	1.72955	0.395606	no	ATBCA1	miR5024-3p:ATBCA1	0.999919
AT3G02080.1	miR5021	569	5.5	0.737939	0.479932	no	NA	miR5021:AT3G02080.1	0.999919
AT3G02260.1	miR5658	14673	6	0.564985	0.822288	no	ASA1	miR5658:ASA1	0.999919
AT3G03920.1	miR1886.3	404	6	0.415091	0.384252	no	NA	miR1886.3:AT3G03920.1	0.999919
AT3G04290.1	miR5661	669	5.5	0.699505	0.290112	no	ATLTL1	miR5661:ATLTL1	0.999919
AT3G07460.2	miR413	824	6	0.303631	0.512994	no	NA	miR413:AT3G07460.2	0.999919
AT3G08930.1	miR869.2	254	6	0.276727	0.885389	no	NA	miR869.2:AT3G08930.1	0.999919
AT3G10960.1	miR8170-5p	2100	6	0.188328	0.796488	no	ATAZG1	miR8170-5p:ATAZG1	0.999919
AT3G12610.1	miR172d-5p	646	5.5	0.149894	0.436012	no	DRT100	miR172d-5p:DRT100	0.999919
AT3G13460.4	miR830-5p	2060	6	0.330535	0.750642	no	ECT2	miR830-5p:ECT2	0.999919
AT3G14210.1	miR859	1044	6	0.622636	0.534286	no	ESM1	miR859:ESM1	0.999919
AT3G15095.3	miR5021	197	5	0.169111	0.480404	no	HCF243	miR5021:HCF243	0.999919
AT3G16190.1	miR869.2	549	6	0.349752	0.936031	no	NA	miR869.2:AT3G16190.1	0.999919
AT3G16480.1	miR173-3p	1295	5.5	0.441995	0.694549	no	MPPalpha	miR173-3p:MPPalpha	0.999919
AT3G17820.1	miR851-5p	1014	5	0.465055	0.0733444	no	ATGSKB6	miR851-5p:ATGSKB6	0.999919
AT3G18490.1	miR847	1195	5	0.219076	0.377967	no	ASPG1	miR847:ASPG1	0.999919
AT3G18750.3	miR838	1666	6	0.153737	0.757688	no	ATWNK6	miR838:ATWNK6	0.999919
AT3G21200.1	miR157a-5p	98	6	0.272884	0.801542	no	GluTRBP	miR157a-5p:GluTRBP	0.999919
AT3G22440.1	miR2936	1793	6	0.388187	0.279515	no	NA	miR2936:AT3G22440.1	0.999919
AT3G23390.1	miR832-3p	416	6	0.176798	0.145789	no	NA	miR832-3p:AT3G23390.1	0.999919
AT3G23810.1	miR408-5p	709	5	0.0768687	0.257479	no	ATSAHH2	miR408-5p:ATSAHH2	0.999919
AT3G25500.1	miR5021	3261	5.5	0.00384343	0.623077	no	AFH1	miR5021:AFH1	0.999919
AT3G26100.2	miR169f-3p	2070	6	0.207545	0.80522	no	NA	miR169f-3p:AT3G26100.2	0.999919
AT3G26740.1	miR5658	208	5	0.430465	0.332847	no	CCL	miR5658:CCL	0.999919
AT3G27810.1	miR5654-3p	481	6	0.680288	0.858597	no	ATMYB21	miR5654-3p:ATMYB21	0.999919
AT3G27810.1	miR858b	498	6	0.196015	0.593653	no	ATMYB21	miR858b:ATMYB21	0.999919
AT3G28500.1	miR2936	237	6	0.415091	0.3609	no	NA	miR2936:AT3G28500.1	0.999919
AT3G28830.1	miR854a	1623	5	0.960858	0.666748	no	NA	miR854a:AT3G28830.1	0.999919
AT3G29075.1	miR842	423	5	0.403561	0.502881	no	NA	miR842:AT3G29075.1	0.999919
AT3G29075.1	miR414	489	5.5	1.13381	0.736137	no	NA	miR414:AT3G29075.1	0.999919
AT3G33530.3	miR408-5p	3902	6	0.334379	0.945532	no	NA	miR408-5p:AT3G33530.3	0.999919
AT3G46030.1	miR4243	261	5.5	0.549611	0.451907	no	HTB11	miR4243:HTB11	0.999919
AT3G46320.1	miR2112-5p	462	5.5	0.180641	0.586022	no	NA	miR2112-5p:AT3G46320.1	0.999919
AT3G48870.2	miR865-3p	1286	6	0.192172	0.801128	no	ATCLPC	miR865-3p:ATCLPC	0.999919
AT3G49570.1	miR775	251	6	0.130677	0.933372	no	LSU3	miR775:LSU3	0.999919
AT3G49910.1	miR172b-5p	606	5.5	0.149894	0.138692	no	NA	miR172b-5p:AT3G49910.1	0.999919
AT3G50820.1	miR782	1083	6	1.13766	0.239406	no	OEC33	miR782:OEC33	0.999919
AT3G51160.1	miR839-5p	782	6	0.161424	0.870385	no	GMD2	miR839-5p:GMD2	0.999919
AT3G52470.1	miR5632-3p	906	6	0.319005	0.515924	no	NA	miR5632-3p:AT3G52470.1	0.999919
AT3G52590.1	miR5024-3p	122	6	0.614949	0.378822	no	EMB2167	miR5024-3p:EMB2167	0.999919
AT3G53420.2	miR5638b	946	6	0.530394	0.202516	no	AtPIP2;1	miR5638b:AtPIP2;1	0.999919
AT3G53650.1	miR4243	160	5.5	0.0307475	0.62487	no	NA	miR4243:AT3G53650.1	0.999919
AT3G55760.3	miR5637	1316	6	0.115303	0.627854	no	NA	miR5637:AT3G55760.3	0.999919
AT3G56370.1	miR159b-5p	3080	6	0.826338	0.564898	no	NA	miR159b-5p:AT3G56370.1	0.999919
AT3G56800.1	miR837-5p	536	5	0.645697	0.299182	no	ACAM-3	miR837-5p:ACAM-3	0.999919
AT3G58730.1	miR168b-3p	814	6	0.603419	0.585782	no	NA	miR168b-3p:AT3G58730.1	0.999919
AT3G60530.1	miR5662	368	6	0.138364	0.691722	no	GATA4	miR5662:GATA4	0.999919
AT3G61130.1	miR774b-5p	2340	6	0.303631	0.508381	no	GAUT1	miR774b-5p:GAUT1	0.999919
AT3G61580.1	miR5021	1144	6	0.699505	0.657833	no	AtSLD1	miR5021:AtSLD1	0.999919
AT3G61980.1	miR3434-5p	563	6	0.357439	0.76087	no	NA	miR3434-5p:AT3G61980.1	0.999919
AT3G62250.1	miR838	281	6	0.672601	0.344787	no	UBQ5	miR838:UBQ5	0.999919
AT4G00800.1	miR5012	5776	6	0.11146	0.758647	no	SETH5	miR5012:SETH5	0.999919
AT4G01150.2	miR3440b-3p	252	5.5	0.90705	0.388194	no	NA	miR3440b-3p:AT4G01150.2	0.999919
AT4G04210.1	miR399c-5p	542	5.5	0.365126	0.67889	no	PUX4	miR399c-5p:PUX4	0.999919
AT4G04640.1	miR5021	1310	6	0.549611	0.532478	no	ATPC1	miR5021:ATPC1	0.999919
AT4G09350.1	miR5628	697	6	1.23759	0.779173	no	CRRJ	miR5628:CRRJ	0.999919
AT4G12420.2	miR414	2007	5	0.607263	0.467149	no	SKU5	miR414:SKU5	0.999919
AT4G13615.1	miR774b-5p	14	5.5	1.2568	0.609628	no	NA	miR774b-5p:AT4G13615.1	0.999919
AT4G13930.1	miR414	1592	5.5	0.430465	0.377781	no	SHM4	miR414:SHM4	0.999919
AT4G14270.2	miR831-3p	273	6	0.284414	0.687361	no	NA	miR831-3p:AT4G14270.2	0.999919
AT4G15790.1	miR172d-5p	457	6	0.215232	0.628367	no	NA	miR172d-5p:AT4G15790.1	0.999919
AT4G16720.1	miR5644	520	5.5	0.603419	0.215245	no	NA	miR5644:AT4G16720.1	0.999919
AT4G17340.1	miR3440b-3p	816	5	0.230606	0.409346	no	DELTA-TIP2	miR3440b-3p:DELTA-TIP2	0.999919
AT4G18370.1	miR832-3p	768	6	0.730252	0.807963	no	DEG5	miR832-3p:DEG5	0.999919
AT4G22220.1	miR5654-3p	444	6	0.153737	0.296864	no	ATISU1	miR5654-3p:ATISU1	0.999919
AT4G23470.3	miR4245	1039	6	0.857086	0.853405	no	NA	miR4245:AT4G23470.3	0.999919
AT4G24090.1	miR2112-5p	860	6	0.51502	0.753434	no	NA	miR2112-5p:AT4G24090.1	0.999919
AT4G24770.1	miR854a	1111	5.5	1.06079	0.714738	no	ATRBP31	miR854a:ATRBP31	0.999919
AT4G26230.1	miR414	332	5	0.661071	0.268074	no	NA	miR414:AT4G26230.1	0.999919
AT4G26370.2	miR846-5p	947	6	0.192172	0.878251	no	NA	miR846-5p:AT4G26370.2	0.999919
AT4G26630.2	miR414	2451	6	0.180641	0.68693	no	NA	miR414:AT4G26630.2	0.999919
AT4G27130.1	miR5632-3p	173	6	0.672601	0.720284	no	NA	miR5632-3p:AT4G27130.1	0.999919
AT4G27410.3	miR156f-3p	834	6	0.115303	0.747542	no	ANAC072	miR156f-3p:ANAC072	0.999919
AT4G28780.1	miR829-5p	831	6	0.219076	0.693778	no	NA	miR829-5p:AT4G28780.1	0.999919
AT4G29030.1	miR841b-5p	609	6	0.388187	0.459414	no	NA	miR841b-5p:AT4G29030.1	0.999919
AT4G29670.2	miR169f-3p	704	6	0.618793	0.495403	no	ACHT2	miR169f-3p:ACHT2	0.999919
AT4G30660.2	miR2111b-3p	224	6	0.299788	0.120945	no	NA	miR2111b-3p:AT4G30660.2	0.999919
AT4G30960.1	miR842	378	6	0.441995	0.866108	no	ATCIPK6	miR842:ATCIPK6	0.999919
AT4G31580.2	miR157a-3p	269	6	0.196015	0.5246	no	At-RSZ22	miR157a-3p:At-RSZ22	0.999919
AT4G33490.2	miR5022	1550	6	0.249823	0.802559	no	NA	miR5022:AT4G33490.2	0.999919
AT4G33680.1	miR5645a	1492	5	0.219076	0.467007	no	AGD2	miR5645a:AGD2	0.999919
AT4G34990.1	miR858b	377	6	0.188328	0.742902	no	AtMYB32	miR858b:AtMYB32	0.999919
AT4G35160.1	miR863-5p	364	6	0.342066	0.88584	no	NA	miR863-5p:AT4G35160.1	0.999919
AT4G35300.5	miR3932a	2239	5.5	0.226763	0.832979	no	TMT2	miR3932a:TMT2	0.999919
AT4G37830.2	miR390a-5p	282	5	0.495803	0.245824	no	NA	miR390a-5p:AT4G37830.2	0.999919
AT4G38740.1	miR776	534	6	1.51816	0.430425	no	ROC1	miR776:ROC1	0.999919
AT4G39330.2	miR841b-5p	348	6	0.468899	0.491123	no	ATCAD9	miR841b-5p:ATCAD9	0.999919
AT5G03220.1	miR4221	515	6	0.24598	0.668167	no	NA	miR4221:AT5G03220.1	0.999919
AT5G03500.3	miR4221	672	6	0.0345909	0.773109	no	NA	miR4221:AT5G03500.3	0.999919
AT5G10300.1	miR3434-3p	780	6	0.253667	0.80902	no	AtHNL	miR3434-3p:AtHNL	0.999919
AT5G12140.1	miR846-5p	430	6	0.184485	0.55311	no	ATCYS1	miR846-5p:ATCYS1	0.999919
AT5G12480.2	miR773b-3p	1338	6	0.176798	0.862044	no	CPK7	miR773b-3p:CPK7	0.999919
AT5G13240.1	miR831-3p	772	6	0.161424	0.537517	no	NA	miR831-3p:AT5G13240.1	0.999919
AT5G13630.2	miR773a	3940	6	0.522707	0.694837	no	ABAR	miR773a:ABAR	0.999919
AT5G14910.1	miR5647	548	5	0.89552	0.443039	no	NA	miR5647:AT5G14910.1	0.999919
AT5G15580.1	miR5021	404	5	0.49196	0.656621	no	LNG1	miR5021:LNG1	0.999919
AT5G18460.1	miR838	1663	6	0.434308	0.861491	no	NA	miR838:AT5G18460.1	0.999919
AT5G20240.1	miR840-3p	402	6	0.49196	0.425554	no	PI	miR840-3p:PI	0.999919
AT5G21274.1	miR168b-3p	240	6	0.39203	0.635207	no	ACAM-6	miR168b-3p:ACAM-6	0.999919
AT5G23740.1	miR399f	552	6	0.803278	0.326233	no	RPS11-BETA	miR399f:RPS11-BETA	0.999919
AT5G23860.2	miR8167a	872	5.5	0.0499646	0.419519	no	TUB8	miR8167a:TUB8	0.999919
AT5G24690.1	miR414	662	5.5	0.0768687	0.750793	no	NA	miR414:AT5G24690.1	0.999919
AT5G27700.1	miR417	258	5.5	0.972389	0.361351	no	NA	miR417:AT5G27700.1	0.999919
AT5G27850.1	miR396b-5p	541	5	0.418934	0.271024	no	NA	miR396b-5p:AT5G27850.1	0.999919
AT5G28300.1	miR414	1022	5.5	0.226763	0.809734	no	NA	miR414:AT5G28300.1	0.999919
AT5G28300.1	miR5658	478	6	0.0845555	0.859834	no	NA	miR5658:AT5G28300.1	0.999919
AT5G30510.1	miR169f-3p	850	6	0.196015	0.577138	no	ARRPS1	miR169f-3p:ARRPS1	0.999919
AT5G33320.1	miR394b-3p	556	6	0.184485	0.516929	no	ARAPPT	miR394b-3p:ARAPPT	0.999919
AT5G33370.2	miR5663-3p	133	5.5	0.207545	0.364828	no	NA	miR5663-3p:AT5G33370.2	0.999919
AT5G37780.3	miR414	560	5	0.149894	0.123162	no	ACAM-1	miR414:ACAM-1	0.999919
AT5G40950.1	miR841a-3p	261	5.5	0.288258	0.514731	no	RPL27	miR841a-3p:RPL27	0.999919
AT5G42950.1	miR5015	4990	5.5	0.388187	0.598795	no	NA	miR5015:AT5G42950.1	0.999919
AT5G43960.2	miR390a-3p	1535	6	0.445838	0.826443	no	NA	miR390a-3p:AT5G43960.2	0.999919
AT5G45390.1	miR5640	372	5	0.184485	0.503417	no	CLPP4	miR5640:CLPP4	0.999919
AT5G45670.1	miR167a-3p	1107	5	0.687975	0.45979	no	NA	miR167a-3p:AT5G45670.1	0.999919
AT5G45670.1	miR5014b	979	5.5	0.272884	0.564022	no	NA	miR5014b:AT5G45670.1	0.999919
AT5G47550.1	miR833a-5p	188	6	1.03388	0.794351	no	NA	miR833a-5p:AT5G47550.1	0.999919
AT5G48360.1	miR8166	2269	6	0.253667	0.405609	no	NA	miR8166:AT5G48360.1	0.999919
AT5G50920.1	miR858b	387	5.5	0.149894	0.78902	no	ATHSP93-V	miR858b:ATHSP93-V	0.999919
AT5G51100.1	miR5021	123	6	0.184485	0.808492	no	FSD2	miR5021:FSD2	0.999919
AT5G54580.1	miR829-5p	209	6	0.161424	0.468369	no	NA	miR829-5p:AT5G54580.1	0.999919
AT5G54580.1	miR447a-3p	559	6	0.63801	0.970399	no	NA	miR447a-3p:AT5G54580.1	0.999919
AT5G55660.1	miR837-5p	436	5.5	0.338222	0.818902	no	NA	miR837-5p:AT5G55660.1	0.999919
AT5G57685.1	miR414	435	6	0.403561	0.646132	no	ATGDU3	miR414:ATGDU3	0.999919
AT5G58710.1	miR8172	706	5	0.169111	0.283441	no	ROC7	miR8172:ROC7	0.999919
AT5G59850.1	miR776	311	6	2.11773	0.255315	no	NA	miR776:AT5G59850.1	0.999919
AT5G59870.1	miR5654-3p	348	5.5	0.384343	0.45931	no	HTA6	miR5654-3p:HTA6	0.999919
AT5G60800.2	miR167a-3p	790	6	0.165268	0.801684	no	NA	miR167a-3p:AT5G60800.2	0.999919
AT5G62210.1	miR2112-5p	659	6	2.21382	0.139569	no	NA	miR2112-5p:AT5G62210.1	0.999919
AT5G64310.1	miR417	426	6	0.326692	0.364817	no	AGP1	miR417:AGP1	0.999919
AT5G65940.3	miR169a-3p	1165	6	0.288258	0.807315	no	CHY1	miR169a-3p:CHY1	0.999919
AT5G67520.1	miR5021	985	6	0.295944	0.7949	no	APK4	miR5021:APK4	0.999919

## Sheet: Col-0 (-Xrn1) (biorep #2)
Target transcript	miRNA	miRNA slice site position in target transcript	Allen score of sRNA:target duplex	Slice site RPM	Slice site RPM + 1/Maximum adjacent site RPM + 1	Previously verified by 5' RACE?	Target gene common name	Interaction name	P-value adjusted for multiple testing
AT1G27340.1	miR394a	1382	1	0.160475	0.763815	yes	LCR	miR394a:LCR	0
AT1G27360.4	miR156j	1309	0	0.231797	0.841625	no	SPL11	miR156j:SPL11	0
AT1G27370.4	miR156j	1324	0	1.50222	1.89107	no	SPL10	miR156j:SPL10	0
AT1G31280.1	miR403-3p	3232	1	0.851409	1.2168	yes	AGO2	miR403-3p:AGO2	0
AT1G33120.1	miR5630a	309	0	0.176077	0.459775	no	NA	miR5630a:AT1G33120.1	0
AT1G33140.1	miR5630a	309	0	0.260772	0.380749	no	PGY2	miR5630a:PGY2	0
AT1G70700.2	miR169d	787	2.5	0.236255	0.202754	no	JAZ9	miR169d:JAZ9	0
AT1G77850.1	miR160a-5p	1419	0.5	8.07278	7.68532	yes	ARF17	miR160a-5p:ARF17	0
AT2G02850.1	miR408-3p	107	1	0.945019	1.19762	yes	ARPN	miR408-3p:ARPN	0
AT2G28350.1	miR160a-5p	1339	2	4.16566	4.4599	yes	ARF10	miR160a-5p:ARF10	0
AT2G33770.1	miR399a	750	1.5	0.187221	1.01525	yes	ATUBC24	miR399a:ATUBC24	0
AT2G42200.1	miR156j	946	0	0.704307	1.43554	no	AtSPL9	miR156j:AtSPL9	0
AT2G45160.1	miR171a-3p	1013	0	27.7377	10.477	yes	ATHAM1	miR171a-3p:ATHAM1	0
AT3G60630.1	miR171a-3p	1055	0	15.2607	2.04953	yes	ATHAM2	miR171a-3p:ATHAM2	0
AT4G00150.1	miR171a-3p	866	0	5.94649	4.3307	yes	ATHAM3	miR171a-3p:ATHAM3	0
AT5G06100.3	miR159a	1259	3.5	1.71619	2.29216	yes	ATMYB33	miR159a:ATMYB33	0
AT5G27660.1	miR5657	1534	0	0.193907	0.00395471	no	DEG14	miR5657:DEG14	0
AT5G39740.2	miR414	997	1.5	1.37295	0.396278	no	OLI7	miR414:OLI7	0
AT5G43270.3	miR156j	1111	0	0.427933	0.906604	yes	SPL2	miR156j:SPL2	0
AT5G60120.2	miR172a	1820	1	0.294204	1.05448	yes	TOE2	miR172a:TOE2	0
AT1G56010.2	miR164a	812	2	0.702078	1.70208	yes	anac021	miR164a:anac021	0.00118095
AT2G27400.1	miR173-5p	378	2.5	2.33135	3.33135	yes	TAS1a	miR173-5p:TAS1a	0.00799436
AT2G33810.1	miR156a-5p	796	1.5	0.945019	1.35577	yes	SPL3	miR156a-5p:SPL3	0.00799436
AT2G39675.1	miR173-5p	378	2.5	18.6574	19.6574	yes	TAS1c	miR173-5p:TAS1c	0.00799436
AT2G39681.1	miR173-5p	417	2.5	9.70874	7.26145	yes	TAS2	miR173-5p:TAS2	0.00799436
AT4G30080.1	miR160a-5p	1518	2.5	3.42347	3.17208	yes	ARF16	miR160a-5p:ARF16	0.00917039
AT1G30490.1	miR165a-3p	805	3	1.41307	1.90052	yes	ATHB9	miR165a-3p:ATHB9	0.0112947
AT2G34710.1	miR165a-3p	880	3	0.846951	1.84695	yes	ATHB-14	miR165a-3p:ATHB-14	0.0190236
AT5G60690.1	miR165a-3p	1272	3	0.840265	1.84027	yes	IFL	miR165a-3p:IFL	0.0190236
AT1G52150.3	miR166a-3p	1278	3	0.512628	1.51263	yes	ATHB-15	miR166a-3p:ATHB-15	0.0355828
AT2G01735.1	miR5021	115	2	0.403416	1.40342	no	RIE1	miR5021:RIE1	0.0355828
AT5G07680.2	miR164a	661	2.5	0.258543	1.25854	yes	ANAC079	miR164a:ANAC079	0.0399174
AT5G19900.1	miR414	790	2	0.314264	0.79613	no	NA	miR414:AT5G19900.1	0.0456379
AT1G64583.1	miR161.1	738	2.5	0.213967	1.21397	no	NA	miR161.1:AT1G64583.1	0.0460259
AT1G12820.1	miR393a-5p	1894	4	2.14635	1.87058	yes	AFB3	miR393a-5p:AFB3	0.0480691
AT3G18520.2	miR414	382	2.5	0.231797	1.03367	no	ATHDA15	miR414:ATHDA15	0.0480691
AT3G26810.1	miR393a-5p	2009	4	2.3358	1.99644	yes	AFB2	miR393a-5p:AFB2	0.0480691
AT2G22840.1	miR396a-5p	791	4	0.949477	1.94948	yes	AtGRF1	miR396a-5p:AtGRF1	0.0514292
AT5G67180.1	miR172a	1308	3	0.280831	1.23407	yes	TOE3	miR172a:TOE3	0.0516929
AT3G49010.5	miR5662	83	3.5	2.44724	1.55495	no	ATBBC1	miR5662:ATBBC1	0.0622644
AT5G57735.1	miR390a-5p	428	4.5	1.76968	2.23233	yes	TAS3c	miR390a-5p:TAS3c	0.0638407
AT4G36920.2	miR172c	1303	1	0.838036	0.966029	yes	AP2	miR172c:AP2	0.0655661
AT1G63130.1	miR161.1	1102	2.5	0.205051	1.07133	yes	TAS8	miR161.1:TAS8	0.0677127
AT1G63980.2	miR414	898	2.5	0.476967	0.931147	no	NA	miR414:AT1G63980.2	0.0677127
AT5G27395.2	miR158a-5p	939	3	0.670875	1.28882	no	NA	miR158a-5p:AT5G27395.2	0.0689412
AT1G17590.4	miR169h	1515	2.5	0.164933	0.784	yes	NF-YA8	miR169h:NF-YA8	0.0727461
AT1G50055.1	miR173-5p	373	4.5	6.48364	5.89408	yes	TAS1b	miR173-5p:TAS1b	0.0762936
AT5G43630.1	miR414	856	2.5	0.100297	0.890024	no	TZP	miR414:TZP	0.0762936
AT5G40340.1	miR414	1045	2.5	0.211738	0.864793	no	NA	miR414:AT5G40340.1	0.080688
AT1G08125.3	miR390a-3p	887	5	6.12257	4.88883	no	NA	miR390a-3p:AT1G08125.3	0.107065
AT2G47460.1	miR858b	400	2.5	0.338781	0.746479	yes	ATMYB12	miR858b:ATMYB12	0.107065
AT3G58110.2	miR414	1000	2.5	0.234026	0.75363	no	NA	miR414:AT3G58110.2	0.110039
AT3G60040.1	miR5655	1182	3.5	0.32095	1.32095	no	NA	miR5655:AT3G60040.1	0.110039
AT5G17580.1	miR415	1674	3	0.644129	1.27257	no	NA	miR415:AT5G17580.1	0.110801
AT1G06180.1	miR858a	402	3	0.213967	1.21397	yes	ATMYB13	miR858a:ATMYB13	0.11293
AT1G20190.1	miR5640	924	5	3.55942	2.08175	no	ATEXP11	miR5640:ATEXP11	0.11293
AT1G04530.1	miR414	809	2.5	0.24517	0.701256	no	TPR4	miR414:TPR4	0.12314
AT1G69935.1	miR414	306	3	0.541603	1.2163	no	SHW1	miR414:SHW1	0.128497
AT2G46800.2	miR856	435	2	0.133729	0.841235	no	ATCDF1	miR856:ATCDF1	0.150263
AT3G11200.2	miR414	1081	2.5	0.251857	0.557394	no	AL2	miR414:AL2	0.150263
AT5G37780.3	miR414	638	2.5	1.90341	0.559164	no	ACAM-1	miR414:ACAM-1	0.150263
AT5G55920.1	miR414	1841	2.5	0.180534	0.579716	no	OLI2	miR414:OLI2	0.150263
AT5G12840.4	miR169b-5p	1129	3	0.269687	0.998248	yes	ATHAP2A	miR169b-5p:ATHAP2A	0.151603
AT1G20090.1	miR5021	124	4	1.08098	1.67424	no	ARAC4	miR5021:ARAC4	0.153029
AT3G52910.1	miR396a-5p	752	4	0.858096	1.43571	yes	AtGRF4	miR396a-5p:AtGRF4	0.153029
AT3G60250.2	miR397b	242	4	0.617383	1.35977	yes	CKB3	miR397b:CKB3	0.155002
AT4G01037.1	miR414	1596	2.5	0.0646358	0.472625	no	AtWTF1	miR414:AtWTF1	0.158877
AT3G44110.2	miR414	1237	2.5	0.530459	0.436349	no	ATJ	miR414:ATJ	0.159848
AT4G34180.1	miR5998a	1284	5.5	0.552747	1.55275	no	NA	miR5998a:AT4G34180.1	0.176185
AT1G17840.1	miR1886.1	237	5	0.822434	1.42038	no	ABCG11	miR1886.1:ABCG11	0.186143
AT1G30330.2	miR167a-5p	3246	5	2.38929	1.66253	no	ARF6	miR167a-5p:ARF6	0.186143
AT3G15270.1	miR156i	654	2	0.222882	0.764515	yes	SPL5	miR156i:SPL5	0.187102
AT4G08870.2	miR2938	778	2.5	0.258543	0.54893	no	ARGAH2	miR2938:ARGAH2	0.187133
AT5G64550.1	miR773a	1861	3	0.501484	0.857446	no	NA	miR773a:AT5G64550.1	0.199703
AT5G64552.1	miR773a	1861	3	0.501484	0.857446	no	CPuORF22	miR773a:CPuORF22	0.199703
AT1G30210.2	miR319a	1022	2.5	0.1315	0.685419	yes	ATTCP24	miR319a:ATTCP24	0.20143
AT2G40820.1	miR778	842	3.5	0.242941	1.24294	no	NA	miR778:AT2G40820.1	0.20783
AT3G17185.2	miR390a-5p	863	4.5	0.572807	1.57281	yes	TAS3a	miR390a-5p:TAS3a	0.20783
AT3G11440.1	miR159a	1165	3.5	0.24517	1.10046	yes	ATMYB65	miR159a:ATMYB65	0.209489
AT3G27290.1	miR414	617	3	0.0378899	1.01748	no	NA	miR414:AT3G27290.1	0.225088
AT3G23690.1	miR393a-5p	416	3	0.247399	0.874935	yes	NA	miR393a-5p:AT3G23690.1	0.234202
AT1G69770.1	miR823	2036	2.5	0.162704	0.721864	yes	CMT3	miR823:CMT3	0.238139
AT4G16890.1	miR773a	408	4.5	0.334323	1.33432	no	BAL	miR773a:BAL	0.246382
AT4G09460.1	miR858a	353	4	0.668646	1.32351	no	AtMYB6	miR858a:AtMYB6	0.249359
AT5G02570.1	miR838	102	4	0.554976	1.2809	no	NA	miR838:AT5G02570.1	0.249359
AT3G15030.3	miR319c	1310	3	0.365526	0.79809	yes	MEE35	miR319c:MEE35	0.26228
AT3G09200.2	miR5662	663	3.5	3.20727	0.957883	no	NA	miR5662:AT3G09200.2	0.315274
AT1G10560.1	miR8184	1274	6	0.512628	1.51263	no	ATPUB18	miR8184:ATPUB18	0.32275
AT3G57060.2	miR414	3170	3.5	0.18945	0.967372	no	NA	miR414:AT3G57060.2	0.32275
AT3G06180.1	miR840-3p	670	6	1.35289	1.90668	no	NA	miR840-3p:AT3G06180.1	0.350282
AT5G23250.2	miR171b-3p	1102	3.5	0.26523	0.837679	no	NA	miR171b-3p:AT5G23250.2	0.350282
AT4G30600.1	miR5658	2024	2	0.294204	0.731626	no	NA	miR5658:AT4G30600.1	0.365943
AT4G27340.1	miR835-3p	216	3.5	0.198365	1.19836	no	NA	miR835-3p:AT4G27340.1	0.367049
ATMG00510.1	miR780.2	696	4	0.1315	1.03045	no	NAD7	miR780.2:NAD7	0.387323
AT3G43240.1	miR5021	173	5	0.608468	1.53003	no	NA	miR5021:AT3G43240.1	0.390708
AT4G16180.2	miR5021	2555	5	0.5104	1.5104	no	NA	miR5021:AT4G16180.2	0.396487
AT5G44410.1	miR5666	878	4.5	0.16939	1.16939	no	NA	miR5666:AT5G44410.1	0.397441
AT1G10120.1	miR396a-5p	1316	5.5	0.570578	1.57058	yes	NA	miR396a-5p:AT1G10120.1	0.398072
AT1G55325.2	miR414	1664	4.5	0.222882	1.22288	no	GCT	miR414:GCT	0.408176
AT4G23680.1	miR5658	557	2	3.24739	0.480299	no	NA	miR5658:AT4G23680.1	0.423077
AT2G03240.1	miR5658	140	3	0.316492	0.835849	no	NA	miR5658:AT2G03240.1	0.425626
AT4G37220.1	miR5628	195	5	0.24517	1.24517	no	NA	miR5628:AT4G37220.1	0.429566
AT1G12460.1	miR157a-3p	2961	5.5	1.21694	1.7369	no	NA	miR157a-3p:AT1G12460.1	0.439428
AT5G58870.1	miR397b	2081	4	0.209509	0.978365	no	ftsh9	miR397b:ftsh9	0.439428
AT1G53230.1	miR319c	1194	3.5	0.263001	0.892858	yes	TCP3	miR319c:TCP3	0.445059
AT2G11910.2	miR414	313	3	0.499256	0.520373	no	NA	miR414:AT2G11910.2	0.451989
AT3G01500.3	miR5658	1175	2	0.483654	0.211211	no	ATBCA1	miR5658:ATBCA1	0.451989
AT3G47360.1	miR172a	612	5	0.249628	1.24963	no	ATHSD3	miR172a:ATHSD3	0.451989
AT3G63140.1	miR5021	237	3	0.430162	0.992268	no	CSP41A	miR5021:CSP41A	0.451989
AT5G46030.1	miR414	453	3	0.412332	0.528204	no	NA	miR414:AT5G46030.1	0.451989
AT5G58140.4	miR829-5p	1056	4	0.332094	1.05657	no	NPL1	miR829-5p:NPL1	0.451989
AT2G11910.2	miR414	502	3	0.81129	0.423559	no	NA	miR414:AT2G11910.2	0.468089
AT5G41340.1	miR414	697	3	0.164933	0.459016	no	ATUBC4	miR414:ATUBC4	0.468089
AT3G05350.1	miR397a	1777	4	0.595095	1.13119	no	NA	miR397a:AT3G05350.1	0.475135
AT3G07780.1	miR773a	1504	3.5	0.187221	0.854089	no	OBE1	miR773a:OBE1	0.480151
AT1G79930.2	miR831-3p	1107	5	0.58618	1.41017	no	AtHsp70-14	miR831-3p:AtHsp70-14	0.4845
AT1G19500.1	miR397b	281	3.5	0.307577	0.638606	no	NA	miR397b:AT1G19500.1	0.489878
AT1G18800.1	miR414	830	3.5	0.682019	0.912903	no	NRP2	miR414:NRP2	0.490159
AT4G28150.2	miR5663-5p	872	5.5	0.871468	1.32719	no	NA	miR5663-5p:AT4G28150.2	0.500177
AT5G35926.1	miR414	913	4.5	0.294204	1.11954	no	NA	miR414:AT5G35926.1	0.522815
AT1G78960.1	miR5638b	385	4.5	0.220653	1.22065	no	ATLUP2	miR5638b:ATLUP2	0.525437
AT4G37740.1	miR396a-5p	920	4	0.263001	0.94497	yes	AtGRF2	miR396a-5p:AtGRF2	0.53635
AT1G16858.1	miR5658	1849	3	0.294204	0.67155	no	CPuORF55	miR5658:CPuORF55	0.552402
AT1G16860.1	miR5658	1849	3	0.294204	0.67155	no	NA	miR5658:AT1G16860.1	0.552402
AT4G13615.1	miR774b-5p	14	5.5	2.4829	1.25146	no	NA	miR774b-5p:AT4G13615.1	0.552402
AT5G17900.1	miR414	528	4	0.209509	0.925	no	NA	miR414:AT5G17900.1	0.560161
AT2G22980.4	miR846-5p	1289	5.5	0.902672	1.30797	no	SCPL13	miR846-5p:SCPL13	0.561162
AT3G49710.1	miR414	1857	4.5	0.225111	1.21967	no	NA	miR414:AT3G49710.1	0.565707
AT1G26090.1	miR5021	1102	5.5	0.523773	1.23035	no	NA	miR5021:AT1G26090.1	0.575324
AT1G47970.1	miR414	233	3.5	0.0757799	0.697832	no	NA	miR414:AT1G47970.1	0.575671
AT3G57870.1	miR397b	279	3.5	0.156017	0.404366	no	AHUS5	miR397b:AHUS5	0.575671
AT5G40730.1	miR414	90	3.5	0.512628	0.687143	no	AGP24	miR414:AGP24	0.586652
AT4G08590.2	miR854a	1381	5	0.927189	1.18664	no	ORL1	miR854a:ORL1	0.588454
AT5G10320.3	miR831-3p	1230	4.5	0.407874	1.00318	no	NA	miR831-3p:AT5G10320.3	0.59731
AT5G66800.1	miR5021	161	5	0.390043	1.39004	no	NA	miR5021:AT5G66800.1	0.597907
AT1G31730.1	miR5658	3131	3	0.303119	0.738527	no	NA	miR5658:AT1G31730.1	0.601386
AT1G54080.2	miR5021	1428	2.5	0.173848	0.793572	no	UBP1A	miR5021:UBP1A	0.60336
AT4G18030.1	miR5999	2119	3.5	0.588408	0.732694	no	NA	miR5999:AT4G18030.1	0.60336
AT2G36390.1	miR414	2567	3.5	0.229568	0.66253	no	BE3	miR414:BE3	0.608582
AT5G55230.2	miR172c	2003	4	0.534917	0.849507	no	ATMAP65-1	miR172c:ATMAP65-1	0.608582
AT3G13340.2	miR161.1	1285	4.5	0.238484	1.01276	no	NA	miR161.1:AT3G13340.2	0.612903
AT4G31010.2	miR8180	115	5	0.162704	1.1627	no	NA	miR8180:AT4G31010.2	0.612903
AT4G38070.1	miR859	2527	4	0.149331	0.880479	no	NA	miR859:AT4G38070.1	0.612903
AT5G37020.2	miR167c-5p	2379	3.5	0.267458	0.264784	yes	ARF8	miR167c-5p:ARF8	0.612903
AT1G26110.2	miR414	1686	4.5	0.648586	1.17656	no	DCP5	miR414:DCP5	0.622908
AT3G05990.1	miR447a-3p	289	5	0.240713	1.24071	no	NA	miR447a-3p:AT3G05990.1	0.622908
AT5G44650.1	miR414	524	4	0.22734	1.00182	no	AtCEST	miR414:AtCEST	0.622908
AT5G40400.1	miR158a-5p	1002	5	0.173848	1.17385	no	NA	miR158a-5p:AT5G40400.1	0.624259
AT2G43850.2	miR5014a-3p	1687	5	0.468052	1.17479	no	NA	miR5014a-3p:AT2G43850.2	0.624475
ATCG01250.1	miR167a-3p	677	4.5	0.00222882	0.971902	no	NDHB.2	miR167a-3p:NDHB.2	0.631257
AT5G65770.3	miR847	2804	4.5	0.303119	0.974986	no	CRWN4	miR847:CRWN4	0.632648
AT5G65780.2	miR847	2828	4.5	0.303119	0.974986	no	ATBCAT-5	miR847:ATBCAT-5	0.632648
AT1G06040.2	miR1886.1	706	3.5	1.28826	0.740921	no	BBX24	miR1886.1:BBX24	0.632844
AT4G14840.1	miR414	207	5	0.144873	1.13979	no	NA	miR414:AT4G14840.1	0.632844
AT1G13920.1	miR5650	751	5	0.298662	1.29866	no	NA	miR5650:AT1G13920.1	0.636933
AT1G60790.1	miR158a-3p	506	6	0.430162	1.43016	no	TBL2	miR158a-3p:TBL2	0.636933
AT4G17090.1	miR5645a	1469	5	0.958392	1.28335	no	AtBAM3	miR5645a:AtBAM3	0.646212
AT2G38000.1	miR413	1025	6	0.488111	1.48811	no	NA	miR413:AT2G38000.1	0.646792
AT1G12830.1	miR414	562	4	0.45245	0.958803	no	NA	miR414:AT1G12830.1	0.653412
AT1G21060.2	miR5021	158	6	0.41456	1.41456	no	NA	miR5021:AT1G21060.2	0.653412
AT3G26570.2	miR5021	212	3	0.191678	0.829369	no	ORF02	miR5021:ORF02	0.654156
AT4G35920.3	miR868-3p	820	5	0.218424	1.21842	no	MCA1	miR868-3p:MCA1	0.67512
AT5G18230.2	miR8171	966	5	0.222882	1.22288	no	NA	miR8171:AT5G18230.2	0.67512
AT5G61790.1	miR414	1023	4	0.650815	0.815113	no	ATCNX1	miR414:ATCNX1	0.675441
AT5G62680.1	miR158a-5p	2178	4.5	0.468052	0.983574	no	GTR2	miR158a-5p:GTR2	0.675441
AT1G68110.1	miR5662	549	5.5	0.367755	1.2017	no	NA	miR5662:AT1G68110.1	0.679705
AT1G72230.1	miR408-3p	823	6	0.775629	1.32851	no	NA	miR408-3p:AT1G72230.1	0.679705
AT4G36630.1	miR4239	2934	5	0.240713	1.24071	no	EMB2754	miR4239:EMB2754	0.683986
AT5G45950.1	miR159a	876	3.5	0.236255	0.331409	no	NA	miR159a:AT5G45950.1	0.687561
AT2G17760.1	miR5021	1688	3	0.205051	0.795488	no	NA	miR5021:AT2G17760.1	0.6902
AT2G37880.1	miR414	597	6	0.274145	1.27415	no	NA	miR414:AT2G37880.1	0.6902
AT4G30280.1	miR5025	994	6	0.258543	1.25854	no	ATXTH18	miR5025:ATXTH18	0.6902
AT1G47550.2	miR414	1721	5	0.39673	1.09239	no	SEC3A	miR414:SEC3A	0.69066
AT3G25520.2	miR414	699	3.5	1.54011	0.355184	no	ATL5	miR414:ATL5	0.69066
AT3G32110.1	miR3440b-5p	1510	5.5	0.198365	1.19836	no	NA	miR3440b-5p:AT3G32110.1	0.69066
AT5G65540.1	miR5645a	1799	4	0.209509	0.822638	no	NA	miR5645a:AT5G65540.1	0.692974
AT1G62710.1	miR863-5p	1194	4.5	0.341009	1.07504	no	BETA-VPE	miR863-5p:BETA-VPE	0.697704
AT1G54350.1	miR156h	1154	4.5	0.182763	1.18276	no	ABCD2	miR156h:ABCD2	0.706072
AT3G27200.1	miR398a-3p	268	5.5	0.713222	1.30135	no	NA	miR398a-3p:AT3G27200.1	0.706072
AT5G08530.1	miR172b-5p	483	5.5	0.653044	1.32047	no	CI51	miR172b-5p:CI51	0.706072
AT1G16720.1	miR868-3p	1851	4	0.35884	0.763356	no	HCF173	miR868-3p:HCF173	0.709209
AT1G37130.1	miR390a-3p	1622	5.5	0.541603	1.3413	no	ATNR2	miR390a-3p:ATNR2	0.722011
AT3G02750.3	miR5024-5p	2114	4	0.109212	0.970742	no	NA	miR5024-5p:AT3G02750.3	0.722011
AT1G33490.1	miR844-3p	514	5.5	0.947248	1.30854	no	NA	miR844-3p:AT1G33490.1	0.735969
AT1G73770.2	miR414	403	4	0.234026	0.757756	no	NA	miR414:AT1G73770.2	0.748749
AT1G18740.1	miR5662	1041	5.5	0.575035	1.12766	no	NA	miR5662:AT1G18740.1	0.755041
AT1G47960.1	miR414	158	4.5	0.149331	0.9068	no	ATC/VIF1	miR414:ATC/VIF1	0.755041
AT1G61140.3	miR830-5p	4030	4	0.122585	0.74765	no	EDA16	miR830-5p:EDA16	0.755041
AT1G64680.1	miR5657	733	4.5	0.312035	0.891019	no	NA	miR5657:AT1G64680.1	0.755041
AT1G72440.1	miR414	2884	4	0.140416	0.703161	no	EDA25	miR414:EDA25	0.755041
AT2G19480.3	miR414	1205	4	0.875926	0.731461	no	NAP1;2	miR414:NAP1;2	0.755041
AT2G21390.1	miR5662	3150	5	0.543832	1.02063	no	NA	miR5662:AT2G21390.1	0.755041
AT2G25760.2	miR773a	2002	4.5	0.372213	0.872461	no	NA	miR773a:AT2G25760.2	0.755041
AT2G41560.1	miR773a	1521	6	0.222882	1.22288	no	ACA4	miR773a:ACA4	0.755041
AT3G06620.1	miR858a	1718	6	0.222882	1.22288	no	NA	miR858a:AT3G06620.1	0.755041
AT3G10490.2	miR158a-5p	395	4.5	0.129272	0.915112	no	ANAC051	miR158a-5p:ANAC051	0.755041
AT3G11220.2	miR5021	1359	3.5	0.218424	0.847983	no	ELO1	miR5021:ELO1	0.755041
AT3G23810.1	miR172d-5p	976	3.5	0.67979	0.434725	no	ATSAHH2	miR172d-5p:ATSAHH2	0.755041
AT3G56050.2	miR831-3p	1524	4	0.205051	0.582198	no	NA	miR831-3p:AT3G56050.2	0.755041
AT4G02725.2	miR4240	351	4	0.294204	0.730705	no	NA	miR4240:AT4G02725.2	0.755041
AT4G20930.1	miR868-3p	747	5	0.523773	1	no	NA	miR868-3p:AT4G20930.1	0.755041
AT4G34100.2	miR5021	205	6	0.18945	1.18945	no	CER9	miR5021:CER9	0.755041
AT5G05940.1	miR838	1875	4	0.196136	0.682204	no	ATROPGEF5	miR838:ATROPGEF5	0.755041
AT5G07990.1	miR774b-5p	102	4	0.579493	0.814872	no	CYP75B1	miR774b-5p:CYP75B1	0.755041
AT5G24930.1	miR847	1463	4.5	0.285289	0.859841	no	ATCOL4	miR847:ATCOL4	0.755041
AT5G65670.2	miR172b-5p	1057	3.5	1.02971	0.593783	no	IAA9	miR172b-5p:IAA9	0.755041
AT5G66650.1	miR5021	1104	6	0.485883	1.18064	no	NA	miR5021:AT5G66650.1	0.755041
AT2G43400.1	miR417	686	5.5	0.144873	1.14487	no	ETFQO	miR417:ETFQO	0.755786
AT5G41700.5	miR5658	966	4	0.298662	0.774137	no	ATUBC8	miR5658:ATUBC8	0.784827
AT1G03475.1	miR5021	262	5	0.742197	1.04969	no	ATCPO-I	miR5021:ATCPO-I	0.785489
AT1G79530.1	miR447c-3p	1239	4	0.22734	0.456732	no	GAPCP-1	miR447c-3p:GAPCP-1	0.785489
AT2G13680.1	miR4227	5237	5.5	0.291975	1.06231	no	ATGSL02	miR4227:ATGSL02	0.785489
AT2G36400.1	miR396a-5p	756	4	0.200594	0.617266	yes	AtGRF3	miR396a-5p:AtGRF3	0.785489
AT3G11250.1	miR5662	764	4	0.209509	0.698713	no	NA	miR5662:AT3G11250.1	0.785489
AT3G56260.2	miR831-3p	768	5	0.746655	0.975114	no	NA	miR831-3p:AT3G56260.2	0.785489
AT5G17850.1	miR5640	278	5.5	0.22734	1.11096	no	NA	miR5640:AT5G17850.1	0.785489
AT3G54790.2	miR858b	1921	5	0.162704	1.1627	no	NA	miR858b:AT3G54790.2	0.790416
AT4G25210.1	miR864-3p	589	4	0.133729	0.960353	no	NA	miR864-3p:AT4G25210.1	0.790605
AT5G19680.1	miR780.2	380	4.5	0.184992	0.976132	no	NA	miR780.2:AT5G19680.1	0.792386
AT5G39710.1	miR774b-3p	2172	6	0.307577	1.30758	no	EMB2745	miR774b-3p:EMB2745	0.792386
AT2G22720.3	miR847	296	5.5	0.238484	1.23848	no	NA	miR847:AT2G22720.3	0.794476
AT2G36740.1	miR5017-5p	1185	5	0.187221	1.18722	no	ATSWC2	miR5017-5p:ATSWC2	0.794476
AT3G07390.1	miR5021	227	3	0.180534	0.802931	no	AIR12	miR5021:AIR12	0.794476
AT3G08520.1	miR831-3p	29	6	4.53342	1.38105	no	NA	miR831-3p:AT3G08520.1	0.794476
AT3G14560.1	miR824-5p	294	4.5	0.363298	1.04977	no	NA	miR824-5p:AT3G14560.1	0.794476
AT5G59130.2	miR170-3p	949	6	0.390043	1.39004	no	NA	miR170-3p:AT5G59130.2	0.794476
AT5G62700.1	miR774a	138	5	0.722138	1.13851	no	TUB3	miR774a:TUB3	0.794476
ATCG01280.1	miR5016	1463	4.5	0.309806	0.970281	no	YCF2.2	miR5016:YCF2.2	0.794476
AT1G15780.1	miR414	3647	5	0.479196	0.998495	no	NRB4	miR414:NRB4	0.79716
AT1G71030.1	miR858a	342	4.5	0.653044	0.843123	no	ATMYBL2	miR858a:ATMYBL2	0.79716
AT1G25682.1	miR773a	892	4	0.213967	0.552587	no	NA	miR773a:AT1G25682.1	0.797836
AT1G64200.1	miR5658	335	4	0.196136	0.751986	no	VHA-E3	miR5658:VHA-E3	0.797836
AT2G35520.2	miR1886.1	270	5	0.468052	1.19612	no	DAD2	miR1886.1:DAD2	0.804437
AT5G59613.2	miR5021	495	6	0.543832	1.28351	no	NA	miR5021:AT5G59613.2	0.804437
AT1G74920.2	miR403-5p	548	6	0.624069	1.33782	no	ALDH10A8	miR403-5p:ALDH10A8	0.808568
AT5G58050.1	miR162a-5p	2202	5	0.726595	1.0459	no	GDPDL6	miR162a-5p:GDPDL6	0.808568
AT4G32130.1	miR5021	166	5	0.205051	1.1997	no	NA	miR5021:AT4G32130.1	0.809265
AT1G55580.1	miR5642a	906	6	0.178306	1.17831	no	LAS	miR5642a:LAS	0.810163
AT3G51160.1	miR839-5p	782	6	1.11441	1.28953	no	GMD2	miR839-5p:GMD2	0.812055
AT5G43330.1	miR171c-5p	640	5.5	0.198365	1.19836	no	c-NAD-MDH2	miR171c-5p:c-NAD-MDH2	0.815493
AT2G45290.1	miR3434-5p	2260	5	0.733282	1.11307	no	NA	miR3434-5p:AT2G45290.1	0.817501
AT3G51880.4	miR414	542	4	0.579493	0.653953	no	AtHMGB1	miR414:AtHMGB1	0.817501
AT4G25370.1	miR824-3p	564	4	0.347696	0.595927	no	NA	miR824-3p:AT4G25370.1	0.817501
AT1G48410.3	miR168a-5p	531	5	0.419018	0.932617	yes	AGO1	miR168a-5p:AGO1	0.819567
AT1G67080.1	miR167a-5p	303	4	0.229568	0.643218	no	ABA4	miR167a-5p:ABA4	0.819567
AT2G30260.1	miR5662	749	4	0.18945	0.639378	no	U2B''	miR5662:U2B''	0.819567
AT3G21200.1	miR157d	97	6	0.445764	1.13668	no	GluTRBP	miR157d:GluTRBP	0.819567
AT3G48460.1	miR394a	811	4	0.202823	0.505938	no	NA	miR394a:AT3G48460.1	0.819567
AT4G18596.1	miR159b-5p	579	4	0.468052	0.3873	no	NA	miR159b-5p:AT4G18596.1	0.819567
AT4G34030.1	miR5663-5p	1743	4.5	0.468052	0.872792	no	MCCB	miR5663-5p:MCCB	0.819567
AT5G10650.2	miR414	1563	5	0.247399	0.973898	no	NA	miR414:AT5G10650.2	0.819567
AT1G62370.1	miR414	226	6	0.421247	1.15589	no	NA	miR414:AT1G62370.1	0.819624
AT3G13040.2	miR393a-3p	1458	5.5	0.922731	1.07341	no	NA	miR393a-3p:AT3G13040.2	0.819624
AT5G49840.1	miR414	572	5.5	0.327636	1.07392	no	NA	miR414:AT5G49840.1	0.819624
AT4G00270.1	miR414	791	4	0.20728	0.645098	no	NA	miR414:AT4G00270.1	0.822161
AT2G37300.2	miR829-5p	638	4.5	0.218424	0.844056	no	ABCI16	miR829-5p:ABCI16	0.826043
AT5G02820.1	miR156h	511	6	0.234026	1.23403	no	BIN5	miR156h:BIN5	0.831272
AT3G55330.1	miR5021	194	4	0.378899	0.897051	no	PPL1	miR5021:PPL1	0.832292
AT2G26410.1	miR5021	1607	5	0.445764	1.01091	no	Iqd4	miR5021:Iqd4	0.834901
AT1G07320.4	miR414	870	4	0.996282	0.563431	no	EMB2784	miR414:EMB2784	0.835141
AT1G12920.1	miR856	1359	4	0.205051	0.596324	no	ERF1-2	miR856:ERF1-2	0.835141
AT1G15690.2	miR414	2086	4	1.98142	0.576664	no	AtAVP1	miR414:AtAVP1	0.835141
AT1G33240.1	miR854a	1426	6	0.505942	1.24509	no	AT-GTL1	miR854a:AT-GTL1	0.835141
AT1G67230.1	miR414	3610	4	0.258543	0.49897	no	CRWN1	miR414:CRWN1	0.835141
AT2G39830.1	miR5021	158	4	0.00222882	0.997781	no	DAR2	miR5021:DAR2	0.835141
AT3G28007.1	miR5021	384	5	0.459137	1.18029	no	AtSWEET4	miR5021:AtSWEET4	0.835141
AT3G53630.1	miR838	560	4.5	0.00222882	0.865299	no	NA	miR838:AT3G53630.1	0.835141
AT3G56150.2	miR838	1477	5	0.200594	1.03856	no	ATEIF3C-1	miR838:ATEIF3C-1	0.835141
AT4G11420.1	miR773a	2668	5	0.546061	1.03894	no	ATEIF3A-1	miR773a:ATEIF3A-1	0.835141
AT4G14930.1	miR859	1199	5	0.341009	1.08473	no	NA	miR859:AT4G14930.1	0.835141
AT1G14670.1	miR5658	1537	4	0.461366	0.67618	no	NA	miR5658:AT1G14670.1	0.836066
AT1G53320.1	miR5013	959	4.5	0.430162	0.781885	no	AtTLP7	miR5013:AtTLP7	0.836066
AT5G25890.1	miR847	282	5	0.291975	0.935449	no	IAA28	miR847:IAA28	0.83975
AT2G11910.2	miR414	442	4	0.702078	0.463203	no	NA	miR414:AT2G11910.2	0.841973
AT3G01120.1	miR773b-3p	1665	4	0.258543	0.319804	no	AtCGS1	miR773b-3p:AtCGS1	0.849876
AT1G01300.1	miR8170-3p	1681	4	0.225111	0.494898	no	NA	miR8170-3p:AT1G01300.1	0.851429
AT1G12430.2	miR837-5p	2418	5	0.200594	0.924485	no	ARK3	miR837-5p:ARK3	0.851429
AT3G03380.1	miR824-5p	2639	5.5	0.363298	1.06254	no	DEG7	miR824-5p:DEG7	0.851429
AT3G14110.3	miR396b-5p	773	4.5	0.474739	0.791784	no	FLU	miR396b-5p:FLU	0.851429
AT3G60750.2	miR5021	274	3	0.372213	0.461634	no	NA	miR5021:AT3G60750.2	0.851429
AT4G32910.1	miR773a	1415	6	0.249628	1.24963	no	NA	miR773a:AT4G32910.1	0.854249
AT3G01720.1	miR858b	2000	5.5	0.149331	1.14933	no	NA	miR858b:AT3G01720.1	0.870833
AT5G65200.1	miR865-5p	1721	6	0.280831	1.28083	no	ATPUB38	miR865-5p:ATPUB38	0.870833
AT1G28510.1	miR5658	686	5	0.298662	1.0411	no	NA	miR5658:AT1G28510.1	0.875594
AT2G39570.1	miR156f-3p	1310	4.5	0.147102	0.809649	no	ACR9	miR156f-3p:ACR9	0.875594
AT2G42010.1	miR5027	2726	5.5	0.298662	1.11693	no	PLDBETA	miR5027:PLDBETA	0.875594
AT3G09740.1	miR833b	248	5	0.256314	1.00535	no	ATSYP71	miR833b:ATSYP71	0.875594
AT3G11830.2	miR5021	1811	3	0.191678	0.37635	no	NA	miR5021:AT3G11830.2	0.875594
AT3G20050.1	miR5645a	1735	4.5	0.606239	0.876013	no	ATTCP-1	miR5645a:ATTCP-1	0.875594
AT3G27830.1	miR418	201	4	0.374442	0.431639	no	RPL12	miR418:RPL12	0.875594
AT2G18840.1	miR5633	1035	4.5	0.158246	0.826617	no	NA	miR5633:AT2G18840.1	0.880361
AT3G50550.2	miR414	93	4.5	0.225111	0.769124	no	NA	miR414:AT3G50550.2	0.880361
AT1G20330.1	miR831-3p	739	5	1.47994	0.889661	no	CVP1	miR831-3p:CVP1	0.880534
AT1G22970.1	miR841b-5p	1122	5.5	0.376671	1.02489	no	NA	miR841b-5p:AT1G22970.1	0.882224
AT2G18960.1	miR419	2243	5.5	0.572807	1.01877	no	AHA1	miR419:AHA1	0.884414
AT2G36570.1	miR391-3p	1650	5	0.240713	0.896886	no	NA	miR391-3p:AT2G36570.1	0.884414
AT5G22080.2	miR158a-5p	762	5	0.570578	1.00285	no	NA	miR158a-5p:AT5G22080.2	0.888251
AT3G01490.1	miR164c-3p	311	5	0.673103	0.902605	no	NA	miR164c-3p:AT3G01490.1	0.890747
AT4G30520.1	miR5021	126	5	0.267458	0.981024	no	SARK	miR5021:SARK	0.890747
AT5G58960.3	miR838	235	5.5	0.240713	1.0018	no	GIL1	miR838:GIL1	0.890747
AT3G61250.1	miR858b	603	5	0.16939	0.87933	no	AtMYB17	miR858b:AtMYB17	0.890814
AT5G01820.1	miR1888a	1706	4	0.1315	0.624693	no	ATCIPK14	miR1888a:ATCIPK14	0.890814
AT5G26000.2	miR4227	851	4	0.840265	0.494214	no	AtTGG1	miR4227:AtTGG1	0.890814
AT5G49100.1	miR5021	1308	4	0.733282	0.832916	no	NA	miR5021:AT5G49100.1	0.890814
AT1G31580.1	miR5021	173	4	0.795689	0.943772	no	CXC750	miR5021:CXC750	0.892307
AT3G52930.1	miR863-5p	351	4.5	0.686476	0.76923	no	AtFBA8	miR863-5p:AtFBA8	0.892307
AT5G61130.1	miR5021	106	5	0.673103	1.0948	no	PDCB1	miR5021:PDCB1	0.892307
AT1G04210.1	miR5641	3897	5	0.213967	0.92683	no	NA	miR5641:AT1G04210.1	0.893521
AT5G11160.1	miR5660	498	6	0.583951	1.08887	no	APT5	miR5660:APT5	0.893521
AT1G50010.1	miR8167a	681	4.5	0.240713	0.718589	no	TUA2	miR8167a:TUA2	0.896084
AT4G22745.1	miR838	313	5	0.211738	0.973151	no	MBD1	miR838:MBD1	0.896084
AT4G28397.2	miR780.2	193	4.5	0.187221	0.703036	no	NA	miR780.2:AT4G28397.2	0.896084
AT5G65650.1	miR5658	806	4.5	0.28306	0.897143	no	NA	miR5658:AT5G65650.1	0.896084
AT1G70780.1	miR172d-5p	414	4	0.120356	0.429752	no	NA	miR172d-5p:AT1G70780.1	0.899205
AT1G70782.1	miR172d-5p	414	4	0.120356	0.429752	no	CPuORF28	miR172d-5p:CPuORF28	0.899205
AT4G28080.1	miR773a	5238	6	1.14338	1.21473	no	NA	miR773a:AT4G28080.1	0.899205
AT4G38600.2	miR5658	2942	5	0.182763	1	no	KAK	miR5658:KAK	0.899205
AT5G62690.1	miR774a	179	5	0.43462	0.971328	no	TUB2	miR774a:TUB2	0.899205
AT1G44920.1	miR418	600	6	1.13893	1.11244	no	NA	miR418:AT1G44920.1	0.905298
AT2G36580.1	miR169f-3p	1402	6	0.637442	1.08251	no	NA	miR169f-3p:AT2G36580.1	0.905298
AT5G56910.1	miR5662	452	4.5	0.11367	0.724505	no	NA	miR5662:AT5G56910.1	0.905351
AT2G17500.4	miR844-5p	1417	5.5	0.702078	0.988352	no	NA	miR844-5p:AT2G17500.4	0.908468
AT1G29930.1	miR842	223	4.5	3.04903	0.668713	no	AB140	miR842:AB140	0.91052
AT4G14760.1	miR172d-5p	5156	5	0.213967	0.996342	no	NET1B	miR172d-5p:NET1B	0.91052
AT4G30210.2	miR5021	149	5	0.18945	1.05746	no	AR2	miR5021:AR2	0.91052
AT3G52420.1	miR834	205	4.5	0.180534	0.680223	no	ATOEP7	miR834:ATOEP7	0.91322
AT3G01360.2	miR5021	292	5	0.294204	0.965097	no	NA	miR5021:AT3G01360.2	0.915855
AT1G72440.1	miR414	2929	4.5	0.338781	0.746479	no	EDA25	miR414:EDA25	0.916238
AT3G56910.1	miR5021	151	3.5	0.191678	0.655497	no	PSRP5	miR5021:PSRP5	0.920371
AT2G25450.1	miR414	389	4.5	0.236255	0.70419	no	NA	miR414:AT2G25450.1	0.923608
AT1G59840.2	miR399b	292	5.5	0.229568	0.950057	no	CCB4	miR399b:CCB4	0.924675
AT4G07825.1	miR1888b	711	5	0.191678	0.879868	no	NA	miR1888b:AT4G07825.1	0.924675
AT4G36520.1	miR773a	2367	5	0.514857	0.851002	no	NA	miR773a:AT4G36520.1	0.924675
AT5G57370.1	miR414	572	4.5	0.211738	0.695523	no	NA	miR414:AT5G57370.1	0.924675
AT1G04470.1	miR5636	1821	5.5	0.218424	0.952935	no	NA	miR5636:AT1G04470.1	0.925251
AT3G01500.3	miR5658	1200	4	0.314264	0.187097	no	ATBCA1	miR5658:ATBCA1	0.926241
AT1G07320.4	miR1886.1	100	6	0.760027	1.19889	no	EMB2784	miR1886.1:EMB2784	0.927113
AT2G42650.1	miR5012	1040	6	0.187221	1.18722	no	NA	miR5012:AT2G42650.1	0.927113
AT3G29075.1	miR414	714	4.5	0.196136	0.717789	no	NA	miR414:AT3G29075.1	0.927113
AT3G44750.2	miR414	472	4.5	0.238484	0.711786	no	ATHD2A	miR414:ATHD2A	0.927113
AT1G22040.1	miR8175	689	5	0.144873	0.795561	no	NA	miR8175:AT1G22040.1	0.927789
AT3G26430.1	miR859	2214	6	0.0690934	1.06909	no	NA	miR859:AT3G26430.1	0.927789
AT3G44530.2	miR5633	303	6	0.156017	1.02167	no	HIRA	miR5633:HIRA	0.929063
AT5G21930.3	miR4228-3p	231	6	0.242941	1.03527	no	ATHMA8	miR4228-3p:ATHMA8	0.929063
AT1G64090.2	miR5021	412	5	0.56612	0.941072	no	RTNLB3	miR5021:RTNLB3	0.93116
AT3G22790.1	miR156c-3p	5200	6	0.32095	1.00509	no	NET1A	miR156c-3p:NET1A	0.933117
AT1G04140.2	miR829-5p	1298	6	0.184992	1.18499	no	NA	miR829-5p:AT1G04140.2	0.947535
AT1G02470.2	miR5021	144	4	0.22734	0.75365	no	NA	miR5021:AT1G02470.2	0.951097
AT1G07920.1	miR414	1280	4.5	1.37964	0.609864	no	NA	miR414:AT1G07920.1	0.951097
AT1G07930.2	miR414	1061	4.5	1.26597	0.619668	no	NA	miR414:AT1G07930.2	0.951097
AT1G11840.6	miR156h	1209	4	0.67979	0.431984	no	ATGLX1	miR156h:ATGLX1	0.951097
AT1G14460.1	miR414	541	5	0.316492	0.796405	no	NA	miR414:AT1G14460.1	0.951097
AT1G22920.2	miR5662	870	5.5	0.454679	0.918386	no	AJH1	miR5662:AJH1	0.951097
AT1G29820.2	miR413	1106	6	0.1315	1.04315	no	NA	miR413:AT1G29820.2	0.951097
AT1G30630.1	miR780.2	524	5	0.737739	0.799111	no	NA	miR780.2:AT1G30630.1	0.951097
AT1G31910.2	miR8170-5p	145	5	0.135958	0.909037	no	NA	miR8170-5p:AT1G31910.2	0.951097
AT1G35310.1	miR414	288	4.5	4.43312	0.602985	no	MLP168	miR414:MLP168	0.951097
AT1G52342.1	miR5021	304	4	0.287518	0.709084	no	NA	miR5021:AT1G52342.1	0.951097
AT1G65060.2	miR859	1368	5.5	1.24368	0.963623	no	4CL3	miR859:4CL3	0.951097
AT1G71840.1	miR5650	1410	4.5	0.260772	0.573313	no	NA	miR5650:AT1G71840.1	0.951097
AT1G72175.1	miR156h	724	5	0.383357	0.877061	no	NA	miR156h:AT1G72175.1	0.951097
AT1G74850.1	miR164c-3p	1955	5	0.401188	0.808402	no	PDE343	miR164c-3p:PDE343	0.951097
AT1G75540.1	miR414	663	5	0.22734	0.82353	no	AtBBX21	miR414:AtBBX21	0.951097
AT1G75630.2	miR5658	743	5.5	0.945019	0.929688	no	AVA-P4	miR5658:AVA-P4	0.951097
AT2G21520.2	miR866-5p	288	5.5	0.327636	0.941517	no	NA	miR866-5p:AT2G21520.2	0.951097
AT3G04260.1	miR414	1975	5	0.149331	0.80114	no	PDE324	miR414:PDE324	0.951097
AT3G19170.2	miR854a	140	6	0.225111	1.01665	no	ATPREP1	miR854a:ATPREP1	0.951097
AT3G22530.1	miR414	806	6	0.764485	1.01021	no	NA	miR414:AT3G22530.1	0.951097
AT3G28810.1	miR5998a	1295	4.5	0.601781	0.457847	no	NA	miR5998a:AT3G28810.1	0.951097
AT3G46630.1	miR845a	186	5.5	0.563891	0.947345	no	NA	miR845a:AT3G46630.1	0.951097
AT3G47390.2	miR5022	1725	6	0.162704	1.0378	no	PHS1	miR5022:PHS1	0.951097
AT3G47620.1	miR854a	348	5	0.200594	0.851423	no	AtTCP14	miR854a:AtTCP14	0.951097
AT3G59020.2	miR414	2829	5.5	0.220653	0.922515	no	NA	miR414:AT3G59020.2	0.951097
AT4G03290.1	miR414	389	5	0.294204	0.826376	no	NA	miR414:AT4G03290.1	0.951097
AT4G23470.3	miR4245	1039	6	0.534917	1.02837	no	NA	miR4245:AT4G23470.3	0.951097
AT4G31200.3	miR854a	1810	6	0.318721	1.00169	no	NA	miR854a:AT4G31200.3	0.951097
AT4G33890.2	miR830-5p	1153	5.5	0.160475	0.923714	no	NA	miR830-5p:AT4G33890.2	0.951097
AT4G37630.2	miR5658	122	6	0.258543	0.98603	no	CYCD5;1	miR5658:CYCD5;1	0.951097
AT5G22650.2	miR414	587	4.5	0.216195	0.626004	no	ATHD2	miR414:ATHD2	0.951097
AT5G22650.2	miR414	638	5	0.686476	0.81479	no	ATHD2	miR414:ATHD2	0.951097
AT5G35680.3	miR414	514	4.5	1.30386	0.567741	no	NA	miR414:AT5G35680.3	0.951097
AT5G56950.1	miR159b-5p	481	5.5	0.133729	0.905638	no	NAP1;3	miR159b-5p:NAP1;3	0.951097
AT1G07940.2	miR414	1411	4.5	3.11589	0.519359	no	NA	miR414:AT1G07940.2	0.95284
AT1G79990.5	miR847	2732	5	0.60401	0.904483	no	NA	miR847:AT1G79990.5	0.958226
AT2G40000.1	miR5027	1085	5	0.200594	0.902794	no	ATHSPRO2	miR5027:ATHSPRO2	0.958226
AT5G60820.1	miR776	854	5.5	0.256314	1.06219	no	NA	miR776:AT5G60820.1	0.958226
AT1G47970.1	miR414	206	5	0.211738	0.786025	no	NA	miR414:AT1G47970.1	0.961422
AT1G01510.1	miR5633	1715	5	0.164933	0.797153	no	AN	miR5633:AN	0.962406
AT1G07920.1	miR861-5p	491	6	0.392272	1.00321	no	NA	miR861-5p:AT1G07920.1	0.962406
AT1G08640.1	miR855	788	4.5	0.666417	0.697669	no	CJD1	miR855:CJD1	0.962406
AT1G19310.1	miR844-3p	940	6	0.164933	0.990524	no	NA	miR844-3p:AT1G19310.1	0.962406
AT1G22850.1	miR414	1074	4.5	0.149331	0.491268	no	NA	miR414:AT1G22850.1	0.962406
AT1G23240.3	miR5021	569	3.5	0.329865	0.246489	no	NA	miR5021:AT1G23240.3	0.962406
AT1G44446.3	miR5632-3p	1955	5	0.258543	0.764441	no	ATCAO	miR5632-3p:ATCAO	0.962406
AT1G67580.2	miR2934-3p	2729	6	0.349925	0.996709	no	NA	miR2934-3p:AT1G67580.2	0.962406
AT1G77770.2	miR5016	885	5.5	0.543832	0.880509	no	NA	miR5016:AT1G77770.2	0.962406
AT2G21520.2	miR5998a	2156	5	0.180534	0.770238	no	NA	miR5998a:AT2G21520.2	0.962406
AT2G35240.1	miR5662	108	6	0.220653	0.963072	no	MORF6	miR5662:MORF6	0.962406
AT3G15830.1	miR831-3p	819	5	0.135958	0.711163	no	NA	miR831-3p:AT3G15830.1	0.962406
AT3G52560.4	miR5652	453	4.5	0.231797	0.386031	no	MMZ4	miR5652:MMZ4	0.962406
AT3G52950.2	miR837-5p	1852	5.5	0.307577	0.908622	no	NA	miR837-5p:AT3G52950.2	0.962406
AT3G56020.1	miR831-3p	71	6	7.52004	0.980506	no	NA	miR831-3p:AT3G56020.1	0.962406
AT3G63460.3	miR838	1766	6	0.263001	0.984366	no	NA	miR838:AT3G63460.3	0.962406
AT4G23100.3	miR865-3p	462	5.5	0.862553	0.908664	no	ATECS1	miR865-3p:ATECS1	0.962406
AT4G26750.1	miR5638b	605	6	0.470281	0.94689	no	EXT-like	miR5638b:EXT-like	0.962406
AT4G32980.1	miR854a	973	5	0.234026	0.818227	no	ATH1	miR854a:ATH1	0.962406
AT5G03880.1	miR398a-5p	213	6	0.421247	0.989142	no	NA	miR398a-5p:AT5G03880.1	0.962406
AT5G07370.4	miR5021	331	5	0.193907	0.863051	no	ATIPK2A	miR5021:ATIPK2A	0.962406
AT5G08139.1	miR4221	1225	5.5	0.222882	0.883996	no	NA	miR4221:AT5G08139.1	0.962406
AT5G18670.1	miR8170-5p	799	5	0.149331	0.834863	no	BAM9	miR8170-5p:BAM9	0.962406
AT5G43760.1	miR8180	1055	4.5	0.45245	0.435122	no	KCS20	miR8180:KCS20	0.962406
AT5G54430.1	miR8167a	126	5	0.247399	0.728101	no	ATPHOS32	miR8167a:ATPHOS32	0.962406
AT5G61240.2	miR393a-5p	381	6	0.289747	0.974734	no	NA	miR393a-5p:AT5G61240.2	0.962406
AT5G67510.1	miR5021	504	3.5	0.465823	0.194884	no	NA	miR5021:AT5G67510.1	0.962406
ATCG00890.1	miR167a-3p	677	4.5	0.220653	0.250802	no	NDHB.1	miR167a-3p:NDHB.1	0.962406
AT2G30010.1	miR156g	1152	6	0.829121	0.949113	no	TBL45	miR156g:TBL45	0.963128
AT2G27110.3	miR8177	2645	6	0.278602	0.97951	no	FRS3	miR8177:FRS3	0.966364
AT4G05330.1	miR829-5p	1047	5.5	0.519315	0.897324	no	AGD13	miR829-5p:AGD13	0.966364
AT5G48580.1	miR5021	504	4	0.20728	0.629357	no	FKBP15-2	miR5021:FKBP15-2	0.966364
AT4G02450.2	miR414	735	4.5	0.635214	0.291176	no	NA	miR414:AT4G02450.2	0.96662
AT1G76170.1	miR167a-3p	353	6	0.205051	0.950762	no	NA	miR167a-3p:AT1G76170.1	0.968344
AT2G33150.1	miR5021	215	4	0.164933	0.620991	no	KAT2	miR5021:KAT2	0.969477
AT3G21465.2	miR773b-3p	764	6	0.514857	0.964522	no	NA	miR773b-3p:AT3G21465.2	0.969593
AT1G20950.1	miR822-5p	244	6	0.240713	0.948864	no	NA	miR822-5p:AT1G20950.1	0.970364
AT1G53070.1	miR833a-5p	666	5	0.619612	0.679339	no	NA	miR833a-5p:AT1G53070.1	0.970364
AT2G40460.1	miR8166	1325	6	0.356611	0.966649	no	NA	miR8166:AT2G40460.1	0.970364
AT3G16640.1	miR414	276	4.5	0.532688	0.213319	no	TCTP	miR414:TCTP	0.970364
AT3G27810.1	miR858a	499	5	0.158246	0.701621	no	ATMYB21	miR858a:ATMYB21	0.970364
AT1G01310.1	miR5021	846	4	0.173848	0.593316	no	NA	miR5021:AT1G01310.1	0.976486
AT1G62940.1	miR859	1270	5.5	0.650815	0.862578	no	ACOS5	miR859:ACOS5	0.976486
AT1G74560.3	miR414	863	5	0.702078	0.726149	no	NRP1	miR414:NRP1	0.976486
AT3G01690.1	miR390b-3p	850	5.5	0.258543	0.843206	no	NA	miR390b-3p:AT3G01690.1	0.976486
AT1G05680.1	miR865-3p	687	5.5	0.26523	0.859234	no	UGT74E2	miR865-3p:UGT74E2	0.982483
AT1G10390.2	miR414	3414	5	0.873697	0.692096	no	NA	miR414:AT1G10390.2	0.982483
AT1G10720.1	miR414	1135	5.5	0.242941	0.847948	no	NA	miR414:AT1G10720.1	0.982483
AT1G12240.1	miR775	1483	5	0.176077	0.669912	no	ATBETAFRUCT4	miR775:ATBETAFRUCT4	0.982483
AT1G55330.1	miR414	96	4.5	0.833579	0.0577	no	AGP21	miR414:AGP21	0.982483
AT1G69840.7	miR773b-3p	754	5	0.182763	0.648209	no	NA	miR773b-3p:AT1G69840.7	0.982483
AT1G74850.1	miR3440b-5p	2044	5.5	0.142644	0.832702	no	PDE343	miR3440b-5p:PDE343	0.982483
AT2G45270.1	miR172b-5p	1162	6	0.332094	0.972343	no	GCP1	miR172b-5p:GCP1	0.982483
AT3G05220.2	miR414	460	5.5	0.425705	0.847615	no	NA	miR414:AT3G05220.2	0.982483
AT3G07850.1	miR5632-3p	1445	4.5	0.492569	0.202643	no	NA	miR5632-3p:AT3G07850.1	0.982483
AT3G26000.1	miR5021	216	5	0.22734	0.824764	no	NA	miR5021:AT3G26000.1	0.982483
AT3G55800.1	miR854a	344	4.5	0.218424	0.533507	no	SBPASE	miR854a:SBPASE	0.982483
AT4G01370.1	miR415	1315	5.5	0.260772	0.858806	no	ATMPK4	miR415:ATMPK4	0.982483
AT4G09010.1	miR5021	203	4	0.200594	0.547611	no	APX4	miR5021:APX4	0.982483
AT4G14815.1	miR861-3p	588	5	0.216195	0.666531	no	NA	miR861-3p:AT4G14815.1	0.982483
AT4G17640.2	miR5640	1227	4.5	0.00668646	0.469184	no	CKB2	miR5640:CKB2	0.982483
AT4G25640.2	miR854a	478	5	0.430162	0.775272	no	ATDTX35	miR854a:ATDTX35	0.982483
AT5G18940.2	miR857	753	5.5	0.329865	0.850357	no	NA	miR857:AT5G18940.2	0.982483
AT5G39570.1	miR842	438	5.5	0.537146	0.833267	no	NA	miR842:AT5G39570.1	0.982483
AT5G49550.1	miR5658	376	5.5	0.225111	0.846075	no	BLOS2	miR5658:BLOS2	0.982483
AT5G50920.1	miR858a	388	5.5	0.307577	0.8232	no	ATHSP93-V	miR858a:ATHSP93-V	0.982483
AT5G52960.1	miR5021	246	4	0.18945	0.584735	no	NA	miR5021:AT5G52960.1	0.982483
AT2G01450.4	miR5021	1686	4	0.220653	0.545124	no	ATMPK17	miR5021:ATMPK17	0.982775
AT1G41830.1	miR390b-3p	1502	5	0.162704	0.666525	no	SKS6	miR390b-3p:SKS6	0.984736
AT1G75110.1	miR828	1354	5	0.149331	0.634537	no	RRA2	miR828:RRA2	0.984736
AT3G49490.1	miR837-5p	2690	6	0.485883	0.943397	no	NA	miR837-5p:AT3G49490.1	0.984736
AT4G36750.1	miR3440b-5p	802	5.5	0.35884	0.823133	no	NA	miR3440b-5p:AT4G36750.1	0.984736
AT5G45390.1	miR5640	372	5	0.454679	0.712777	no	CLPP4	miR5640:CLPP4	0.984736
AT1G02370.1	miR169f-3p	1399	6	0.162704	0.912537	no	NA	miR169f-3p:AT1G02370.1	0.986411
AT3G02170.1	miR5998a	2941	5	0.278602	0.877613	no	LNG2	miR5998a:LNG2	0.987742
AT3G60530.1	miR5662	368	6	0.421247	0.912691	no	GATA4	miR5662:GATA4	0.990009
AT1G31300.2	miR5663-5p	1133	5.5	0.361069	0.838061	no	NA	miR5663-5p:AT1G31300.2	0.991341
AT1G47970.1	miR414	263	5	0.269687	0.665758	no	NA	miR414:AT1G47970.1	0.991341
AT1G68530.2	miR824-3p	485	5.5	0.595095	0.799926	no	CER6	miR824-3p:CER6	0.991341
AT1G74560.3	miR414	827	5	0.579493	0.673851	no	NRP1	miR414:NRP1	0.991341
AT4G33010.2	miR5662	815	5.5	0.454679	0.803118	no	AtGLDP1	miR5662:AtGLDP1	0.991341
AT5G07090.2	miR5640	976	4.5	0.570578	0.297496	no	NA	miR5640:AT5G07090.2	0.991341
AT5G50920.1	miR173-3p	1539	5	0.298662	0.624732	no	ATHSP93-V	miR173-3p:ATHSP93-V	0.991341
AT5G56270.1	miR5021	2684	4	0.196136	0.498916	no	ATWRKY2	miR5021:ATWRKY2	0.991341
AT5G58250.1	miR4245	718	5	0.577264	0.710035	no	EMB3143	miR4245:EMB3143	0.991341
AT1G05580.2	miR5637	1520	5.5	0.187221	1	no	ATCHX23	miR5637:ATCHX23	0.993623
AT2G20630.2	miR2934-5p	780	6	0.300891	1.13187	no	PIA1	miR2934-5p:PIA1	0.993623
AT4G14760.1	miR838	5258	5.5	0.218424	0.998174	no	NET1B	miR838:NET1B	0.993623
AT1G66180.1	miR5021	391	5	0.187221	0.783718	no	NA	miR5021:AT1G66180.1	0.993745
AT1G02500.2	miR858b	966	5	0.309806	0.446329	no	AtSAM1	miR858b:AtSAM1	0.995856
AT1G02740.1	miR400	1167	5	0.18945	0.610836	no	NA	miR400:AT1G02740.1	0.995856
AT1G02816.1	miR5021	205	5	0.202823	0.603205	no	NA	miR5021:AT1G02816.1	0.995856
AT1G02820.1	miR5021	135	5.5	0.193907	0.78352	no	AtLEA3	miR5021:AtLEA3	0.995856
AT1G04630.1	miR414	591	5.5	0.592866	0.780488	no	MEE4	miR414:MEE4	0.995856
AT1G07210.1	miR414	857	5.5	0.450222	0.798691	no	NA	miR414:AT1G07210.1	0.995856
AT1G07320.4	miR865-3p	595	5	0.160475	0.458065	no	EMB2784	miR865-3p:EMB2784	0.995856
AT1G08470.1	miR5661	637	6	0.365526	0.902751	no	SSL3	miR5661:SSL3	0.995856
AT1G10670.4	miR162a-5p	939	5.5	0.312035	0.617268	no	ACLA-1	miR162a-5p:ACLA-1	0.995856
AT1G13140.2	miR5656	1434	5.5	0.242941	0.702646	no	CYP86C3	miR5656:CYP86C3	0.995856
AT1G14570.4	miR165a-5p	1170	5.5	0.572807	0.683345	no	NA	miR165a-5p:AT1G14570.4	0.995856
AT1G17730.1	miR417	319	6	0.419018	0.861913	no	CHMP1B	miR417:CHMP1B	0.995856
AT1G18070.3	miR172b-5p	1600	5	0.127043	0.454057	no	NA	miR172b-5p:AT1G18070.3	0.995856
AT1G19570.2	miR842	467	5	1.07206	0.24603	no	ATDHAR1	miR842:ATDHAR1	0.995856
AT1G19770.1	miR854a	393	5	0.15156	0.718925	no	ATPUP14	miR854a:ATPUP14	0.995856
AT1G20010.1	miR847	1426	5	0.938333	0.331092	no	TUB5	miR847:TUB5	0.995856
AT1G27400.1	miR773a	591	5	0.200594	0.389304	no	NA	miR773a:AT1G27400.1	0.995856
AT1G28440.1	miR4243	2719	6	0.575035	0.866367	no	HSL1	miR4243:HSL1	0.995856
AT1G29950.2	miR5014b	1047	6	0.164933	0.851712	no	NA	miR5014b:AT1G29950.2	0.995856
AT1G29951.1	miR5014b	1032	6	0.164933	0.851712	no	CPuORF35	miR5014b:CPuORF35	0.995856
AT1G29952.1	miR5014b	1047	6	0.164933	0.851712	no	CPuORF34	miR5014b:CPuORF34	0.995856
AT1G32160.1	miR390b-3p	1108	5	0.249628	0.554749	no	NA	miR390b-3p:AT1G32160.1	0.995856
AT1G33811.1	miR158a-5p	958	5.5	0.158246	0.695052	no	NA	miR158a-5p:AT1G33811.1	0.995856
AT1G45145.1	miR837-5p	390	5	0.724366	0.542289	no	ATH5	miR837-5p:ATH5	0.995856
AT1G49760.2	miR8183	2090	5	0.615154	0.397368	no	PAB8	miR8183:PAB8	0.995856
AT1G50480.1	miR829-5p	2037	5.5	0.211738	0.714724	no	THFS	miR829-5p:THFS	0.995856
AT1G54030.1	miR4240	690	5.5	0.144873	0.64477	no	ERMO3	miR4240:ERMO3	0.995856
AT1G54570.1	miR829-5p	1250	6	0.173848	0.90389	no	PES1	miR829-5p:PES1	0.995856
AT1G56300.1	miR419	310	5.5	0.193907	0.758019	no	NA	miR419:AT1G56300.1	0.995856
AT1G57750.2	miR414	1303	5	0.213967	0.161351	no	CYP96A15	miR414:CYP96A15	0.995856
AT1G62750.1	miR842	2095	5	0.332094	0.474842	no	ATSCO1	miR842:ATSCO1	0.995856
AT1G66330.2	miR5664	1005	5.5	0.218424	0.703863	no	NA	miR5664:AT1G66330.2	0.995856
AT1G67230.1	miR838	1015	5	0.182763	0.552394	no	CRWN1	miR838:CRWN1	0.995856
AT1G67290.1	miR8180	1073	6	0.260772	0.853622	no	GLOX1	miR8180:GLOX1	0.995856
AT1G68540.2	miR5028	1029	5.5	0.184992	0.762064	no	CCRL6	miR5028:CCRL6	0.995856
AT1G69370.1	miR857	883	5.5	0.274145	0.781322	no	cm-3	miR857:cm-3	0.995856
AT1G71695.1	miR8180	852	5	0.225111	0.230791	no	NA	miR8180:AT1G71695.1	0.995856
AT1G72040.1	miR5656	1602	5.5	0.15156	0.66868	no	AtdNK	miR5656:AtdNK	0.995856
AT1G74260.1	miR5028	3488	5.5	0.35884	0.75113	no	PUR4	miR5028:PUR4	0.995856
AT1G74840.2	miR863-5p	280	6	0.140416	0.879657	no	NA	miR863-5p:AT1G74840.2	0.995856
AT1G75930.1	miR5021	178	4	0.463594	0.150313	no	EXL6	miR5021:EXL6	0.995856
AT1G78040.2	miR415	511	4.5	1.73402	0.161431	no	NA	miR415:AT1G78040.2	0.995856
AT1G79230.3	miR864-5p	1530	5	0.211738	0.58796	no	ATMST1	miR864-5p:ATMST1	0.995856
AT2G01490.1	miR5655	1039	6	0.256314	0.784323	no	PAHX	miR5655:PAHX	0.995856
AT2G01970.1	miR156i	1111	5	0.39673	0.745441	no	NA	miR156i:AT2G01970.1	0.995856
AT2G16485.1	miR157c-3p	594	5.5	0.278602	0.73673	no	NERD	miR157c-3p:NERD	0.995856
AT2G20120.1	miR5021	288	6	0.285289	0.778578	no	COV1	miR5021:COV1	0.995856
AT2G22795.1	miR831-3p	206	5.5	0.28306	0.73178	no	NA	miR831-3p:AT2G22795.1	0.995856
AT2G22795.1	miR4221	722	6	0.517086	0.802043	no	NA	miR4221:AT2G22795.1	0.995856
AT2G27030.3	miR837-5p	445	5	0.96285	0.485573	no	ACAM-2	miR837-5p:ACAM-2	0.995856
AT2G27600.1	miR3932b-5p	220	5.5	0.247399	0.662589	no	ATSKD1	miR3932b-5p:ATSKD1	0.995856
AT2G30110.1	miR414	3313	5	0.523773	0.598833	no	ATUBA1	miR414:ATUBA1	0.995856
AT2G32765.1	miR5656	131	5.5	0.459137	0.735031	no	ATSUMO5	miR5656:ATSUMO5	0.995856
AT2G33700.1	miR2112-3p	958	6	0.086924	0.856057	no	PP2CG1	miR2112-3p:PP2CG1	0.995856
AT2G37040.1	miR406	1537	5.5	0.171619	0.700267	no	ATPAL1	miR406:ATPAL1	0.995856
AT2G37340.3	miR2112-3p	419	5	0.517086	0.439235	no	AT-RS2Z33	miR2112-3p:AT-RS2Z33	0.995856
AT2G40660.1	miR169f-3p	762	5.5	0.1315	0.766097	no	NA	miR169f-3p:AT2G40660.1	0.995856
AT2G41690.1	miR414	688	5.5	0.00445764	0.668977	no	AT-HSFB3	miR414:AT-HSFB3	0.995856
AT2G43560.1	miR773a	631	5	0.238484	0.549258	no	NA	miR773a:AT2G43560.1	0.995856
AT2G45820.1	miR5021	738	6	0.916045	0.767788	no	NA	miR5021:AT2G45820.1	0.995856
AT3G01530.1	miR858a	992	5.5	0.15156	0.645297	no	ATMYB57	miR858a:ATMYB57	0.995856
AT3G02360.2	miR859	1605	5	0.135958	0.373748	no	NA	miR859:AT3G02360.2	0.995856
AT3G03540.1	miR398a-5p	1545	6	0.39673	0.871986	no	NPC5	miR398a-5p:NPC5	0.995856
AT3G06430.1	miR403-3p	1533	5	0.167161	0.601455	no	AtPPR2	miR403-3p:AtPPR2	0.995856
AT3G08930.1	miR869.2	254	6	0.149331	0.811222	no	NA	miR869.2:AT3G08930.1	0.995856
AT3G11120.1	miR831-3p	105	5	3.14932	0.316143	no	NA	miR831-3p:AT3G11120.1	0.995856
AT3G12400.1	miR156b-3p	844	6	0.258543	0.878631	no	ATELC	miR156b-3p:ATELC	0.995856
AT3G15840.5	miR867	393	5.5	0.521544	0.828815	no	PIFI	miR867:PIFI	0.995856
AT3G17820.1	miR851-5p	1014	5	0.267458	0.074446	no	ATGSKB6	miR851-5p:ATGSKB6	0.995856
AT3G18490.1	miR847	1195	5	0.488111	0.202344	no	ASPG1	miR847:ASPG1	0.995856
AT3G22910.1	miR830-5p	2796	5	0.597324	0.578112	no	NA	miR830-5p:AT3G22910.1	0.995856
AT3G23810.1	miR5021	1697	4	0.599552	0.256157	no	ATSAHH2	miR5021:ATSAHH2	0.995856
AT3G23810.1	miR408-5p	709	5	0.216195	0.465321	no	ATSAHH2	miR408-5p:ATSAHH2	0.995856
AT3G24350.2	miR5021	819	6	0.387815	0.830592	no	ATSYP32	miR5021:ATSYP32	0.995856
AT3G24520.1	miR780.2	1273	6	0.234026	0.813419	no	AT-HSFC1	miR780.2:AT-HSFC1	0.995856
AT3G26420.1	miR167a-3p	398	5.5	0.153789	0.740936	no	ATRZ-1A	miR167a-3p:ATRZ-1A	0.995856
AT3G26430.1	miR167a-3p	395	5.5	0.153789	0.740936	no	NA	miR167a-3p:AT3G26430.1	0.995856
AT3G28830.1	miR854a	1623	5	2.25334	0.616241	no	NA	miR854a:AT3G28830.1	0.995856
AT3G28980.1	miR773a	1123	5	0.390043	0.343303	no	NA	miR773a:AT3G28980.1	0.995856
AT3G47690.1	miR831-3p	679	6	0.160475	0.871166	no	AtEB1a	miR831-3p:AtEB1a	0.995856
AT3G51270.2	miR842	1131	6	0.24517	0.881641	no	NA	miR842:AT3G51270.2	0.995856
AT3G53310.1	miR824-3p	900	5	0.138187	0.619241	no	NA	miR824-3p:AT3G53310.1	0.995856
AT3G53370.2	miR866-3p	263	5	0.334323	0.635752	no	NA	miR866-3p:AT3G53370.2	0.995856
AT3G53460.4	miR403-5p	1385	5	0.193907	0.161703	no	CP29	miR403-5p:CP29	0.995856
AT3G54670.3	miR837-5p	951	6	0.296433	0.913613	no	ATSMC1	miR837-5p:ATSMC1	0.995856
AT3G55010.2	miR156h	1370	5	0.182763	0.700396	no	ATPURM	miR156h:ATPURM	0.995856
AT3G55250.1	miR863-3p	609	5	0.267458	0.712913	no	PDE329	miR863-3p:PDE329	0.995856
AT3G58640.2	miR390b-3p	2487	6	0.216195	0.83734	no	NA	miR390b-3p:AT3G58640.2	0.995856
AT3G61580.1	miR5021	1144	6	0.927189	0.81985	no	AtSLD1	miR5021:AtSLD1	0.995856
AT3G63290.2	miR413	1127	6	0.247399	0.829546	no	NA	miR413:AT3G63290.2	0.995856
AT4G02940.1	miR408-5p	1935	5	0.216195	0.576409	no	NA	miR408-5p:AT4G02940.1	0.995856
AT4G08350.1	miR777	2334	6	0.213967	0.809713	no	GTA02	miR777:GTA02	0.995856
AT4G08980.5	miR8173	623	6	0.236255	0.864416	no	FBW2	miR8173:FBW2	0.995856
AT4G09830.1	miR5012	603	5.5	0.492569	0.802317	no	NA	miR5012:AT4G09830.1	0.995856
AT4G10480.2	miR414	216	5	0.92496	0.607076	no	NA	miR414:AT4G10480.2	0.995856
AT4G14160.3	miR773b-5p	2107	5	0.173848	0.551677	no	NA	miR773b-5p:AT4G14160.3	0.995856
AT4G17170.1	miR156a-3p	527	5.5	0.303119	0.732054	no	AT-RAB2	miR156a-3p:AT-RAB2	0.995856
AT4G17950.1	miR4221	1390	5.5	0.287518	0.679076	no	NA	miR4221:AT4G17950.1	0.995856
AT4G20050.2	miR8180	805	6	0.20728	0.805253	no	QRT3	miR8180:QRT3	0.995856
AT4G24690.1	miR159b-5p	2026	5.5	0.211738	0.630217	no	AtNBR1	miR159b-5p:AtNBR1	0.995856
AT4G26230.1	miR414	332	5	1.10549	0.404452	no	NA	miR414:AT4G26230.1	0.995856
AT4G26670.1	miR158b	566	6	0.900443	0.888502	no	NA	miR158b:AT4G26670.1	0.995856
AT4G27580.1	miR774b-5p	677	5.5	0.867011	0.736302	no	NA	miR774b-5p:AT4G27580.1	0.995856
AT4G28400.1	miR5662	423	6	0.133729	0.835707	no	NA	miR5662:AT4G28400.1	0.995856
AT4G29340.1	miR834	140	5.5	0.156017	0.772209	no	PRF4	miR834:PRF4	0.995856
AT4G30993.2	miR5021	1384	5	0.198365	0.734852	no	NA	miR5021:AT4G30993.2	0.995856
AT4G31340.2	miR156j	1410	5	0.225111	0.514348	no	NA	miR156j:AT4G31340.2	0.995856
AT4G31840.1	miR5021	208	5.5	0.196136	0.706451	no	AtENODL15	miR5021:AtENODL15	0.995856
AT4G33380.2	miR5640	1079	6	0.309806	0.843541	no	NA	miR5640:AT4G33380.2	0.995856
AT4G33680.1	miR5645a	1492	5	0.278602	0.512355	no	AGD2	miR5645a:AGD2	0.995856
AT4G34710.2	miR8180	440	6	0.387815	0.784545	no	ADC2	miR8180:ADC2	0.995856
AT4G35320.1	miR2938	469	5.5	0.303119	0.629578	no	NA	miR2938:AT4G35320.1	0.995856
AT4G35800.1	miR774b-5p	5544	5	0.193907	0.519225	no	NRPB1	miR774b-5p:NRPB1	0.995856
AT4G38920.1	miR156a-5p	404	5	0.481425	0.619063	no	ATVHA-C3	miR156a-5p:ATVHA-C3	0.995856
AT5G01020.1	miR169g-3p	1344	5.5	0.421247	0.625367	no	NA	miR169g-3p:AT5G01020.1	0.995856
AT5G01500.1	miR834	1025	5.5	0.178306	0.664433	no	TAAC	miR834:TAAC	0.995856
AT5G01530.1	miR5662	896	5.5	4.60251	0.733132	no	LHCB4.1	miR5662:LHCB4.1	0.995856
AT5G03690.2	miR447a-3p	539	6	0.635214	0.845563	no	AtFBA4	miR447a-3p:AtFBA4	0.995856
AT5G06290.1	miR5021	192	6	0.198365	0.825065	no	2-Cys Prx B	miR5021:2-Cys Prx B	0.995856
AT5G06700.1	miR3440b-5p	1555	6	0.187221	0.814891	no	TBR	miR3440b-5p:TBR	0.995856
AT5G07530.2	miR164b-3p	1497	5	1.28603	0.122619	no	ATGRP-7	miR164b-3p:ATGRP-7	0.995856
AT5G08590.1	miR393b-3p	318	5.5	0.160475	0.72048	no	ASK2	miR393b-3p:ASK2	0.995856
AT5G11440.1	miR857	486	6	0.274145	0.838631	no	CID5	miR857:CID5	0.995856
AT5G13240.1	miR831-3p	772	6	0.702078	0.820559	no	NA	miR831-3p:AT5G13240.1	0.995856
AT5G14910.1	miR5647	548	5	0.345467	0.356848	no	NA	miR5647:AT5G14910.1	0.995856
AT5G15220.1	miR5662	222	6	0.225111	0.842186	no	NA	miR5662:AT5G15220.1	0.995856
AT5G16060.1	miR8165	233	5	0.184992	0.676708	no	NA	miR8165:AT5G16060.1	0.995856
AT5G16290.2	miR826b	1353	5.5	0.276374	0.745014	no	VAT1	miR826b:VAT1	0.995856
AT5G23610.2	miR157a-3p	1940	5.5	0.202823	0.78364	no	NA	miR157a-3p:AT5G23610.2	0.995856
AT5G24690.1	miR414	662	5.5	0.18945	0.784036	no	NA	miR414:AT5G24690.1	0.995856
AT5G24890.1	miR390b-3p	440	5.5	0.338781	0.631173	no	NA	miR390b-3p:AT5G24890.1	0.995856
AT5G27850.1	miR396b-5p	541	5	1.38855	0.287953	no	NA	miR396b-5p:AT5G27850.1	0.995856
AT5G27990.1	miR414	543	6	0.416789	0.859396	no	NA	miR414:AT5G27990.1	0.995856
AT5G37780.3	miR414	560	5	0.209509	0.128119	no	ACAM-1	miR414:ACAM-1	0.995856
AT5G45670.1	miR167a-3p	1107	5	0.659731	0.326656	no	NA	miR167a-3p:AT5G45670.1	0.995856
AT5G49820.1	miR5997	1685	6	0.294204	0.810233	no	RUS6	miR5997:RUS6	0.995856
AT5G52650.1	miR866-3p	155	5	0.628527	0.474871	no	NA	miR866-3p:AT5G52650.1	0.995856
AT5G53460.3	miR5639-5p	6421	5.5	0.142644	0.682949	no	GLT1	miR5639-5p:GLT1	0.995856
AT5G54580.1	miR829-5p	209	6	0.267458	0.922162	no	NA	miR829-5p:AT5G54580.1	0.995856
AT5G54750.2	miR838	245	6	0.24517	0.843059	no	NA	miR838:AT5G54750.2	0.995856
AT5G55660.1	miR847	1804	6	0.575035	0.854839	no	NA	miR847:AT5G55660.1	0.995856
AT5G55940.1	miR156i	825	6	0.392272	0.814783	no	emb2731	miR156i:emb2731	0.995856
AT5G58240.2	miR837-5p	409	6	0.499256	0.831822	no	FHIT	miR837-5p:FHIT	0.995856
AT5G59300.1	miR824-3p	198	6	0.225111	0.823266	no	ATUBC7	miR824-3p:ATUBC7	0.995856
AT5G60360.3	miR396b-5p	627	5.5	0.521544	0.709143	no	AALP	miR396b-5p:AALP	0.995856
AT5G60800.2	miR167a-3p	790	6	0.271916	0.813302	no	NA	miR167a-3p:AT5G60800.2	0.995856
AT5G61330.1	miR414	360	6	0.242941	0.819295	no	NA	miR414:AT5G61330.1	0.995856
AT5G61440.1	miR396b-5p	718	5	0.247399	0.194487	no	ACHT5	miR396b-5p:ACHT5	0.995856
AT5G65670.2	miR390a-3p	939	5.5	0.514857	0.675166	no	IAA9	miR390a-3p:IAA9	0.995856
AT5G66720.2	miR3932b-5p	1240	5.5	0.184992	0.59096	no	NA	miR3932b-5p:AT5G66720.2	0.995856
ATCG00170.1	miR159c	373	5	0.367755	0.419554	no	RPOC2	miR159c:RPOC2	0.995856
AT1G21630.2	miR5652	3851	5.5	0.220653	0.648382	no	NA	miR5652:AT1G21630.2	0.996559
AT1G34060.1	miR4239	1301	5.5	0.309806	0.624735	no	NA	miR4239:AT1G34060.1	0.996559
AT1G47530.1	miR5642a	1452	5.5	0.231797	0.613619	no	NA	miR5642a:AT1G47530.1	0.996559
AT2G21240.2	miR472-3p	853	6	0.419018	0.797162	no	ATBPC4	miR472-3p:ATBPC4	0.996559
AT3G01480.2	miR156d-3p	1405	5.5	0.187221	0.613908	no	ATCYP38	miR156d-3p:ATCYP38	0.996559
AT3G04290.1	miR5661	669	5.5	2.42718	0.654418	no	ATLTL1	miR5661:ATLTL1	0.996559
AT3G52470.1	miR5632-3p	906	6	0.276374	0.825565	no	NA	miR5632-3p:AT3G52470.1	0.996559
AT4G22220.1	miR172b-5p	545	5	0.343238	0.353332	no	ATISU1	miR172b-5p:ATISU1	0.996559
AT4G23820.1	miR870-5p	1356	5	0.682019	0.436813	no	NA	miR870-5p:AT4G23820.1	0.996559
AT4G26230.1	miR398a-3p	115	5.5	0.369984	0.569839	no	NA	miR398a-3p:AT4G26230.1	0.996559
AT4G36790.1	miR415	1559	6	0.120356	0.760848	no	NA	miR415:AT4G36790.1	0.996559
AT4G37830.2	miR390a-5p	282	5	0.341009	0.145765	no	NA	miR390a-5p:AT4G37830.2	0.996559
AT4G37980.2	miR5630a	1064	6	0.405645	0.778922	no	ATCAD7	miR5630a:ATCAD7	0.996559
AT5G42620.2	miR868-3p	2540	6	0.16939	0.782306	no	NA	miR868-3p:AT5G42620.2	0.996559
AT2G35680.1	miR414	1517	5.5	0.258543	0.640454	no	NA	miR414:AT2G35680.1	0.996642
AT4G23490.1	miR164c-3p	1848	6	0.376671	1.11158	no	NA	miR164c-3p:AT4G23490.1	0.999251
AT2G44730.1	miR414	861	6	0.537146	1.11838	no	NA	miR414:AT2G44730.1	0.999358
AT1G01080.2	miR447c-3p	513	5.5	0.238484	0.530893	no	NA	miR447c-3p:AT1G01080.2	0.999995
AT1G01630.1	miR8171	978	6	0.695392	0.602429	no	NA	miR8171:AT1G01630.1	0.999995
AT1G02205.3	miR774b-3p	1614	6	0.52823	0.542601	no	CER1	miR774b-3p:CER1	0.999995
AT1G02305.1	miR5014b	956	6	0.517086	0.737717	no	NA	miR5014b:AT1G02305.1	0.999995
AT1G04410.1	miR171c-5p	666	6	0.965079	0.329883	no	c-NAD-MDH1	miR171c-5p:c-NAD-MDH1	0.999995
AT1G06760.1	miR834	682	6	0.532688	0.508756	no	NA	miR834:AT1G06760.1	0.999995
AT1G07930.2	miR861-5p	503	6	0.325408	0.769629	no	NA	miR861-5p:AT1G07930.2	0.999995
AT1G07940.2	miR861-5p	622	6	1.2526	0.682116	no	NA	miR861-5p:AT1G07940.2	0.999995
AT1G09200.1	miR4221	102	6	0.312035	0.238746	no	NA	miR4221:AT1G09200.1	0.999995
AT1G10450.1	miR5015	2979	6	0.20728	0.717756	no	SNL6	miR5015:SNL6	0.999995
AT1G11910.1	miR172d-5p	1558	6	0.32095	0.23531	no	APA1	miR172d-5p:APA1	0.999995
AT1G12080.2	miR4221	353	5.5	0.56612	0.159746	no	NA	miR4221:AT1G12080.2	0.999995
AT1G12080.2	miR838	461	5.5	0.991825	0.262947	no	NA	miR838:AT1G12080.2	0.999995
AT1G12520.3	miR398a-3p	820	6	0.369984	0.765781	no	ATCCS	miR398a-3p:ATCCS	0.999995
AT1G12810.2	miR5640	395	6	0.158246	0.483562	no	NA	miR5640:AT1G12810.2	0.999995
AT1G14060.1	miR414	353	6	0.127043	0.651913	no	NA	miR414:AT1G14060.1	0.999995
AT1G14320.2	miR447c-3p	453	6	0.285289	0.126195	no	RPL10	miR447c-3p:RPL10	0.999995
AT1G15340.2	miR773a	1048	5.5	0.229568	0.308596	no	MBD10	miR773a:MBD10	0.999995
AT1G15340.2	miR773a	994	5.5	0.523773	0.441171	no	MBD10	miR773a:MBD10	0.999995
AT1G15690.2	miR156h	74	5.5	0.216195	0.580085	no	AtAVP1	miR156h:AtAVP1	0.999995
AT1G17290.1	miR156h	1903	6	0.216195	0.46022	no	AlaAT1	miR156h:AlaAT1	0.999995
AT1G19660.2	miR414	506	6	0.18945	0.587955	no	NA	miR414:AT1G19660.2	0.999995
AT1G19730.1	miR8170-3p	366	6	0.913816	0.760105	no	ATH4	miR8170-3p:ATH4	0.999995
AT1G20090.1	miR156i	1146	6	0.220653	0.678086	no	ARAC4	miR156i:ARAC4	0.999995
AT1G20693.3	miR414	583	5.5	0.579493	0.296307	no	HMG BETA 1	miR414:HMG BETA 1	0.999995
AT1G20693.3	miR390a-3p	589	5.5	0.561663	0.40462	no	HMG BETA 1	miR390a-3p:HMG BETA 1	0.999995
AT1G22200.2	miR172b-5p	985	6	0.56612	0.113394	no	NA	miR172b-5p:AT1G22200.2	0.999995
AT1G22380.1	miR157a-3p	1302	6	0.412332	0.631981	no	AtUGT85A3	miR157a-3p:AtUGT85A3	0.999995
AT1G22400.1	miR157a-3p	1371	6	0.196136	0.753041	no	ATUGT85A1	miR157a-3p:ATUGT85A1	0.999995
AT1G22640.1	miR164c-3p	613	6	0.1315	0.510902	no	ATMYB3	miR164c-3p:ATMYB3	0.999995
AT1G23280.1	miR5645a	856	6	0.240713	0.745537	no	NA	miR5645a:AT1G23280.1	0.999995
AT1G24260.3	miR398a-5p	743	6	0.32095	0.185054	no	AGL9	miR398a-5p:AGL9	0.999995
AT1G24260.3	miR5658	794	6	0.196136	0.167569	no	AGL9	miR5658:AGL9	0.999995
AT1G26480.1	miR414	192	6	0.00222882	0.714135	no	GF14 IOTA	miR414:GF14 IOTA	0.999995
AT1G27680.1	miR398b-3p	1723	6	0.398959	0.130177	no	APL2	miR398b-3p:APL2	0.999995
AT1G27710.2	miR170-3p	661	6	0.441306	0.441512	no	NA	miR170-3p:AT1G27710.2	0.999995
AT1G28270.1	miR838	391	6	0.39673	0.382192	no	RALFL4	miR838:RALFL4	0.999995
AT1G30230.2	miR5665	662	6	1.32615	0.530949	no	eEF-1Bb1	miR5665:eEF-1Bb1	0.999995
AT1G30230.2	miR5021	834	5	0.405645	0.459782	no	eEF-1Bb1	miR5021:eEF-1Bb1	0.999995
AT1G36370.1	miR170-3p	1088	6	0.211738	0.713786	no	SHM7	miR170-3p:SHM7	0.999995
AT1G44780.2	miR414	1414	6	0.158246	0.764591	no	NA	miR414:AT1G44780.2	0.999995
AT1G45688.2	miR1886.1	740	6	0.32095	0.761131	no	NA	miR1886.1:AT1G45688.2	0.999995
AT1G49300.2	miR3434-5p	515	6	0.588408	0.801049	no	ATRAB7	miR3434-5p:ATRAB7	0.999995
AT1G50010.1	miR5641	96	6	0.505942	0.601306	no	TUA2	miR5641:TUA2	0.999995
AT1G51560.1	miR843	1068	6	0.202823	0.623412	no	NA	miR843:AT1G51560.1	0.999995
AT1G52030.2	miR4239	1548	6	0.115899	0.260267	no	F-ATMBP	miR4239:F-ATMBP	0.999995
AT1G52300.1	miR778	330	6	2.71247	0.3687	no	NA	miR778:AT1G52300.1	0.999995
AT1G53570.5	miR865-3p	2149	6	0.153789	0.704629	no	MAP3KA	miR865-3p:MAP3KA	0.999995
AT1G53910.3	miR396a-5p	591	6	0.316492	0.698463	no	RAP2.12	miR396a-5p:RAP2.12	0.999995
AT1G55670.1	miR157d	654	5.5	0.800146	0.246415	no	PSAG	miR157d:PSAG	0.999995
AT1G60950.1	miR773b-3p	423	5.5	0.998511	0.0758494	no	ATFD2	miR773b-3p:ATFD2	0.999995
AT1G62430.1	miR5652	1233	6	0.216195	0.528918	no	ATCDS1	miR5652:ATCDS1	0.999995
AT1G62480.1	miR838	473	5.5	0.405645	0.0574605	no	NA	miR838:AT1G62480.1	0.999995
AT1G64090.2	miR5658	1173	6	0.298662	0.528416	no	RTNLB3	miR5658:RTNLB3	0.999995
AT1G68010.2	miR5646	1243	5.5	1.0676	0.433758	no	ATHPR1	miR5646:ATHPR1	0.999995
AT1G68560.1	miR5021	118	6	0.369984	0.400261	no	ATXYL1	miR5021:ATXYL1	0.999995
AT1G68600.1	miR773b-3p	1679	6	0.251857	0.590192	no	NA	miR773b-3p:AT1G68600.1	0.999995
AT1G70490.3	miR866-5p	435	6	0.28306	0.352594	no	ARFA1D	miR866-5p:ARFA1D	0.999995
AT1G72020.1	miR5651	278	6	1.10772	0.211669	no	NA	miR5651:AT1G72020.1	0.999995
AT1G73230.1	miR157a-3p	238	5.5	0.225111	0.337288	no	NA	miR157a-3p:AT1G73230.1	0.999995
AT1G74060.1	miR835-3p	810	5.5	0.920502	0.409602	no	NA	miR835-3p:AT1G74060.1	0.999995
AT1G75180.3	miR414	1321	5.5	0.133729	0.582221	no	NA	miR414:AT1G75180.3	0.999995
AT1G76030.1	miR865-3p	1462	5.5	0.416789	0.588761	no	AtVAB1	miR865-3p:AtVAB1	0.999995
AT1G76890.2	miR847	1687	6	0.744426	0.753532	no	AT-GT2	miR847:AT-GT2	0.999995
AT2G01320.4	miR866-5p	2270	6	0.35884	0.765272	no	ABCG7	miR866-5p:ABCG7	0.999995
AT2G01720.1	miR403-3p	849	6	0.247399	0.733829	no	NA	miR403-3p:AT2G01720.1	0.999995
AT2G02160.1	miR838	1952	6	0.149331	0.695282	no	NA	miR838:AT2G02160.1	0.999995
AT2G04570.1	miR1888b	104	6	1.0208	0.689131	no	NA	miR1888b:AT2G04570.1	0.999995
AT2G04570.1	miR774b-3p	984	6	0.568349	0.14609	no	NA	miR774b-3p:AT2G04570.1	0.999995
AT2G06050.3	miR5646	286	6	0.269687	0.570428	no	AtOPR3	miR5646:AtOPR3	0.999995
AT2G07698.1	miR867	1295	6	0.851409	0.214883	no	NA	miR867:AT2G07698.1	0.999995
AT2G10940.2	miR862-5p	726	6	2.80608	0.230932	no	NA	miR862-5p:AT2G10940.2	0.999995
AT2G13360.2	miR5021	1381	5.5	0.416789	0.334444	no	AGT	miR5021:AGT	0.999995
AT2G14878.1	miR5655	646	6	0.109212	0.739842	no	NA	miR5655:AT2G14878.1	0.999995
AT2G16485.1	miR390b-3p	5048	5.5	0.407874	0.583977	no	NERD	miR390b-3p:NERD	0.999995
AT2G16600.2	miR773b-5p	405	5	2.23551	0.383667	no	ROC3	miR773b-5p:ROC3	0.999995
AT2G16600.2	miR414	538	5.5	0.90713	0.210825	no	ROC3	miR414:ROC3	0.999995
AT2G16940.3	miR847	334	6	0.200594	0.596092	no	NA	miR847:AT2G16940.3	0.999995
AT2G18160.1	miR5633	829	5.5	0.149331	0.247006	no	ATBZIP2	miR5633:ATBZIP2	0.999995
AT2G18162.1	miR5633	829	5.5	0.149331	0.247006	no	CPuORF1	miR5633:CPuORF1	0.999995
AT2G19730.3	miR8168	455	6	0.523773	0.174198	no	NA	miR8168:AT2G19730.3	0.999995
AT2G20260.1	miR5631	141	5.5	0.325408	0.605773	no	PSAE-2	miR5631:PSAE-2	0.999995
AT2G20260.1	miR834	241	6	0.947248	0.563777	no	PSAE-2	miR834:PSAE-2	0.999995
AT2G20890.1	miR838	906	5.5	0.49034	0.336916	no	PSB29	miR838:PSB29	0.999995
AT2G21790.1	miR838	2624	6	0.238484	0.661771	no	ATRNR1	miR838:ATRNR1	0.999995
AT2G22230.1	miR3434-3p	667	6	0.670875	0.732336	no	NA	miR3434-3p:AT2G22230.1	0.999995
AT2G22795.1	miR4221	656	6	0.401188	0.680621	no	NA	miR4221:AT2G22795.1	0.999995
AT2G23120.1	miR8176	270	5.5	0.561663	0.319696	no	NA	miR8176:AT2G23120.1	0.999995
AT2G23350.1	miR854a	2192	5.5	0.407874	0.366043	no	PAB4	miR854a:PAB4	0.999995
AT2G26540.1	miR5641	295	6	0.158246	0.644216	no	ATDUF3	miR5641:ATDUF3	0.999995
AT2G29700.1	miR831-3p	205	6	0.229568	0.691601	no	ATPH1	miR831-3p:ATPH1	0.999995
AT2G32235.1	miR5021	412	5	0.218424	0.547397	no	NA	miR5021:AT2G32235.1	0.999995
AT2G32240.1	miR5021	4034	5	0.218424	0.547397	no	NA	miR5021:AT2G32240.1	0.999995
AT2G32260.1	miR414	1042	6	0.222882	0.683555	no	ATCCT1	miR414:ATCCT1	0.999995
AT2G35490.1	miR865-3p	476	6	0.16939	0.721026	no	NA	miR865-3p:AT2G35490.1	0.999995
AT2G36530.1	miR414	723	5.5	0.481425	0.385389	no	ENO2	miR414:ENO2	0.999995
AT2G37270.2	miR8166	403	6	0.294204	0.325365	no	ATRPS5B	miR8166:ATRPS5B	0.999995
AT2G37340.3	miR5655	1252	6	0.142644	0.45302	no	AT-RS2Z33	miR5655:AT-RS2Z33	0.999995
AT2G38640.1	miR831-3p	533	6	0.387815	0.740683	no	NA	miR831-3p:AT2G38640.1	0.999995
AT2G39730.3	miR863-5p	420	6	0.561663	0.365756	no	RCA	miR863-5p:RCA	0.999995
AT2G40290.3	miR837-5p	1038	6	0.349925	0.674713	no	NA	miR837-5p:AT2G40290.3	0.999995
AT2G43710.2	miR5632-5p	1274	6	0.374442	0.482274	no	FAB2	miR5632-5p:FAB2	0.999995
AT2G44060.2	miR414	1037	5.5	0.260772	0.273313	no	NA	miR414:AT2G44060.2	0.999995
AT2G47110.2	miR838	303	6	0.577264	0.331979	no	UBI6	miR838:UBI6	0.999995
AT3G01120.1	miR8177	1768	6	0.838036	0.277323	no	AtCGS1	miR8177:AtCGS1	0.999995
AT3G01130.2	miR829-5p	173	5.5	0.748883	0.619962	no	NA	miR829-5p:AT3G01130.2	0.999995
AT3G01230.1	miR859	541	6	0.938333	0.584192	no	NA	miR859:AT3G01230.1	0.999995
AT3G01390.2	miR4221	411	6	0.135958	0.407191	no	AVMA10	miR4221:AVMA10	0.999995
AT3G01390.2	miR837-5p	470	5.5	0.28306	0.387221	no	AVMA10	miR837-5p:AVMA10	0.999995
AT3G01500.3	miR5024-3p	748	6	1.2682	0.264421	no	ATBCA1	miR5024-3p:ATBCA1	0.999995
AT3G02080.1	miR5021	569	5.5	0.5104	0.449779	no	NA	miR5021:AT3G02080.1	0.999995
AT3G05220.2	miR847	1234	6	0.463594	0.647814	no	NA	miR847:AT3G05220.2	0.999995
AT3G07460.2	miR413	824	6	0.229568	0.389412	no	NA	miR413:AT3G07460.2	0.999995
AT3G07820.1	miR833a-5p	992	6	0.479196	0.481384	no	NA	miR833a-5p:AT3G07820.1	0.999995
AT3G12610.1	miR3932a	1000	6	0.127043	0.221622	no	DRT100	miR3932a:DRT100	0.999995
AT3G12610.1	miR172d-5p	646	5.5	0.601781	0.518644	no	DRT100	miR172d-5p:DRT100	0.999995
AT3G13390.1	miR407	1945	6	0.176077	0.532101	no	sks11	miR407:sks11	0.999995
AT3G14210.1	miR859	1044	6	0.575035	0.480509	no	ESM1	miR859:ESM1	0.999995
AT3G15450.3	miR2933a	170	5.5	0.211738	0.534755	no	NA	miR2933a:AT3G15450.3	0.999995
AT3G17060.1	miR5631	1008	5.5	0.356611	0.487064	no	NA	miR5631:AT3G17060.1	0.999995
AT3G17160.1	miR847	291	6	0.0802375	0.420475	no	NA	miR847:AT3G17160.1	0.999995
AT3G19820.3	miR5658	126	6	0.171619	0.420982	no	CBB1	miR5658:CBB1	0.999995
AT3G24080.2	miR414	552	5.5	0.173848	0.619851	no	NA	miR414:AT3G24080.2	0.999995
AT3G27160.1	miR1886.1	90	6	0.213967	0.532596	no	GHS1	miR1886.1:GHS1	0.999995
AT3G28500.1	miR2936	237	6	0.187221	0.268527	no	NA	miR2936:AT3G28500.1	0.999995
AT3G28790.1	miR5021	1897	5	0.222882	0.147544	no	NA	miR5021:AT3G28790.1	0.999995
AT3G29075.1	miR414	489	5.5	0.559434	0.599202	no	NA	miR414:AT3G29075.1	0.999995
AT3G44110.2	miR394a	465	6	0.312035	0.597227	no	ATJ	miR394a:ATJ	0.999995
AT3G45310.2	miR167a-5p	639	5.5	0.269687	0.601126	no	NA	miR167a-5p:AT3G45310.2	0.999995
AT3G46030.1	miR4243	261	5.5	0.129272	0.38019	no	HTB11	miR4243:HTB11	0.999995
AT3G49910.1	miR172b-5p	606	5.5	0.15156	0.21495	no	NA	miR172b-5p:AT3G49910.1	0.999995
AT3G52380.1	miR859	1111	5.5	0.550518	0.530369	no	CP33	miR859:CP33	0.999995
AT3G52590.1	miR5024-3p	122	6	0.461366	0.340136	no	EMB2167	miR5024-3p:EMB2167	0.999995
AT3G53260.1	miR415	2333	6	0.225111	0.481039	no	ATPAL2	miR415:ATPAL2	0.999995
AT3G55330.1	miR839-5p	702	6	0.198365	0.00978864	no	PPL1	miR839-5p:PPL1	0.999995
AT3G56370.1	miR159b-5p	3080	6	0.436849	0.496789	no	NA	miR159b-5p:AT3G56370.1	0.999995
AT3G56490.1	miR5663-5p	197	5.5	0.0958392	0.458788	no	HINT1	miR5663-5p:HINT1	0.999995
AT3G58730.1	miR168b-3p	814	6	0.445764	0.449942	no	NA	miR168b-3p:AT3G58730.1	0.999995
AT3G61130.1	miR774b-5p	2340	6	0.178306	0.504133	no	GAUT1	miR774b-5p:GAUT1	0.999995
AT3G62250.1	miR838	281	6	0.579493	0.224073	no	UBQ5	miR838:UBQ5	0.999995
AT3G62940.3	miR5642a	645	6	0.209509	0.393904	no	NA	miR5642a:AT3G62940.3	0.999995
AT4G00170.1	miR399b	557	6	0.209509	0.710607	no	NA	miR399b:AT4G00170.1	0.999995
AT4G01150.2	miR3440b-3p	252	5.5	0.637442	0.296516	no	NA	miR3440b-3p:AT4G01150.2	0.999995
AT4G02290.1	miR156h	100	5	0.497027	0.254644	no	AtGH9B13	miR156h:AtGH9B13	0.999995
AT4G02530.1	miR870-3p	96	5.5	0.231797	0.509527	no	NA	miR870-3p:AT4G02530.1	0.999995
AT4G02600.2	miR829-5p	1722	6	0.20728	0.674834	no	ATMLO1	miR829-5p:ATMLO1	0.999995
AT4G02940.1	miR8172	1827	6	0.160475	0.557061	no	NA	miR8172:AT4G02940.1	0.999995
AT4G03290.1	miR172b-5p	567	5.5	0.483654	0.555341	no	NA	miR172b-5p:AT4G03290.1	0.999995
AT4G05180.1	miR8171	365	5.5	1.2526	0.356917	no	PSBQ	miR8171:PSBQ	0.999995
AT4G06634.3	miR414	1250	6	0.00222882	0.543295	no	AtYY1	miR414:AtYY1	0.999995
AT4G10450.1	miR5630a	310	5.5	0.479196	0.601329	no	NA	miR5630a:AT4G10450.1	0.999995
AT4G13930.1	miR414	1592	5.5	0.655273	0.372327	no	SHM4	miR414:SHM4	0.999995
AT4G14270.2	miR831-3p	273	6	0.269687	0.534565	no	NA	miR831-3p:AT4G14270.2	0.999995
AT4G14880.4	miR5998a	890	6	0.162704	0.485875	no	ATCYS-3A	miR5998a:ATCYS-3A	0.999995
AT4G16155.1	miR158a-5p	1815	5.5	0.240713	0.43298	no	NA	miR158a-5p:AT4G16155.1	0.999995
AT4G18395.1	miR774b-5p	54	6	0.211738	0.548789	no	NA	miR774b-5p:AT4G18395.1	0.999995
AT4G18596.1	miR5021	123	6	0.196136	0.342773	no	NA	miR5021:AT4G18596.1	0.999995
AT4G18970.2	miR862-5p	1262	6	0.684248	0.484817	no	NA	miR862-5p:AT4G18970.2	0.999995
AT4G19110.3	miR5632-5p	1174	6	0.191678	0.691082	no	NA	miR5632-5p:AT4G19110.3	0.999995
AT4G19112.1	miR5632-5p	2258	6	0.191678	0.691082	no	CPuORF25	miR5632-5p:CPuORF25	0.999995
AT4G20440.4	miR5633	960	6	0.873697	0.654386	no	smB	miR5633:smB	0.999995
AT4G20480.1	miR5012	596	5.5	0.184992	0.484802	no	NA	miR5012:AT4G20480.1	0.999995
AT4G20980.4	miR5651	1477	5.5	0.129272	0.625773	no	NA	miR5651:AT4G20980.4	0.999995
AT4G21150.3	miR396b-3p	1941	6	0.280831	0.722246	no	HAP6	miR396b-3p:HAP6	0.999995
AT4G21660.2	miR779.1	1804	6	0.291975	0.602148	no	NA	miR779.1:AT4G21660.2	0.999995
AT4G22190.1	miR845a	1059	6	0.441306	0.601738	no	NA	miR845a:AT4G22190.1	0.999995
AT4G22220.1	miR5654-3p	444	6	0.688705	0.380419	no	ATISU1	miR5654-3p:ATISU1	0.999995
AT4G23630.1	miR5021	723	6	0.0200594	0.561785	no	BTI1	miR5021:BTI1	0.999995
AT4G24090.1	miR2112-5p	860	6	0.160475	0.554689	no	NA	miR2112-5p:AT4G24090.1	0.999995
AT4G24640.1	miR413	549	6	0.86924	0.548985	no	APPB1	miR413:APPB1	0.999995
AT4G25780.1	miR2937	198	6	0.200594	0.775432	no	NA	miR2937:AT4G25780.1	0.999995
AT4G26670.1	miR5659	666	5.5	0.198365	0.395441	no	NA	miR5659:AT4G26670.1	0.999995
AT4G27130.1	miR5632-3p	173	6	0.249628	0.621811	no	NA	miR5632-3p:AT4G27130.1	0.999995
AT4G27580.1	miR822-5p	654	6	0.144873	0.451509	no	NA	miR822-5p:AT4G27580.1	0.999995
AT4G28050.1	miR169a-3p	817	6	0.459137	0.480784	no	TET7	miR169a-3p:TET7	0.999995
AT4G28780.1	miR829-5p	831	6	0.276374	0.528454	no	NA	miR829-5p:AT4G28780.1	0.999995
AT4G29020.2	miR172b-5p	319	5.5	0.171619	0.55587	no	NA	miR172b-5p:AT4G29020.2	0.999995
AT4G29030.1	miR841b-5p	609	6	0.213967	0.475415	no	NA	miR841b-5p:AT4G29030.1	0.999995
AT4G29670.2	miR169f-3p	704	6	0.164933	0.590807	no	ACHT2	miR169f-3p:ACHT2	0.999995
AT4G30960.1	miR842	378	6	0.256314	0.0335045	no	ATCIPK6	miR842:ATCIPK6	0.999995
AT4G35300.5	miR3932a	2239	5.5	0.285289	0.618963	no	TMT2	miR3932a:TMT2	0.999995
AT4G35300.5	miR837-5p	2294	5.5	0.153789	0.498397	no	TMT2	miR837-5p:TMT2	0.999995
AT4G37180.2	miR847	1082	6	0.240713	0.590523	no	NA	miR847:AT4G37180.2	0.999995
AT4G38740.1	miR776	534	6	0.323179	0.194094	no	ROC1	miR776:ROC1	0.999995
AT4G39330.2	miR841b-5p	348	6	0.708765	0.651005	no	ATCAD9	miR841b-5p:ATCAD9	0.999995
AT5G03660.2	miR840-3p	491	5.5	0.682019	0.452529	no	NA	miR840-3p:AT5G03660.2	0.999995
AT5G07420.1	miR775	250	6	0.176077	0.315277	no	NA	miR775:AT5G07420.1	0.999995
AT5G11740.1	miR5020b	190	5	0.309806	0.139038	no	AGP15	miR5020b:AGP15	0.999995
AT5G13140.1	miR5642a	344	6	0.225111	0.713236	no	NA	miR5642a:AT5G13140.1	0.999995
AT5G14380.1	miR5021	573	6	0.218424	0.30926	no	AGP6	miR5021:AGP6	0.999995
AT5G15780.1	miR5021	503	6	0.702078	0.713929	no	NA	miR5021:AT5G15780.1	0.999995
AT5G15870.1	miR8170-3p	2101	6	0.256314	0.543207	no	NA	miR8170-3p:AT5G15870.1	0.999995
AT5G20890.1	miR5663-5p	866	6	0.390043	0.479499	no	NA	miR5663-5p:AT5G20890.1	0.999995
AT5G21274.1	miR168b-3p	240	6	0.225111	0.529716	no	ACAM-6	miR168b-3p:ACAM-6	0.999995
AT5G21940.1	miR5658	806	6	0.441306	0.469394	no	NA	miR5658:AT5G21940.1	0.999995
AT5G23740.1	miR399f	552	6	0.5104	0.171663	no	RPS11-BETA	miR399f:RPS11-BETA	0.999995
AT5G23940.1	miR5645a	976	5.5	0.156017	0.268926	no	DCR	miR5645a:DCR	0.999995
AT5G25760.2	miR395b	586	6	0.267458	0.766742	no	PEX4	miR395b:PEX4	0.999995
AT5G27700.1	miR417	258	5.5	0.468052	0.355141	no	NA	miR417:AT5G27700.1	0.999995
AT5G33370.2	miR5663-3p	133	5.5	0.606239	0.236932	no	NA	miR5663-3p:AT5G33370.2	0.999995
AT5G39320.1	miR5645a	1515	5.5	0.216195	0.530459	no	UDG4	miR5645a:UDG4	0.999995
AT5G40770.1	miR842	254	6	0.196136	0.228013	no	ATPHB3	miR842:ATPHB3	0.999995
AT5G48360.1	miR8166	2269	6	0.182763	0.631246	no	NA	miR8166:AT5G48360.1	0.999995
AT5G50020.2	miR414	1387	6	1.01411	0.457166	no	NA	miR414:AT5G50020.2	0.999995
AT5G53460.3	miR5014b	6850	5.5	0.156017	0.480395	no	GLT1	miR5014b:GLT1	0.999995
AT5G53620.3	miR5632-5p	1867	6	0.15156	0.666954	no	NA	miR5632-5p:AT5G53620.3	0.999995
AT5G54580.1	miR447a-3p	559	6	0.240713	0.401733	no	NA	miR447a-3p:AT5G54580.1	0.999995
AT5G56360.1	miR778	1885	5.5	0.22734	0.421429	no	PSL4	miR778:PSL4	0.999995
AT5G57020.1	miR3440b-5p	1483	6	0.374442	0.59832	no	ATNMT1	miR3440b-5p:ATNMT1	0.999995
AT5G59850.1	miR776	311	6	0.120356	0.108132	no	NA	miR776:AT5G59850.1	0.999995
AT5G59870.1	miR5654-3p	348	5.5	0.891528	0.279106	no	HTA6	miR5654-3p:HTA6	0.999995
AT5G60400.3	miR157c-3p	351	6	0.200594	0.526214	no	NA	miR157c-3p:AT5G60400.3	0.999995
AT5G62210.1	miR2112-5p	659	6	1.27934	0.160982	no	NA	miR2112-5p:AT5G62210.1	0.999995
AT5G62530.1	miR5017-5p	1483	6	0.20728	0.620703	no	ALDH12A1	miR5017-5p:ALDH12A1	0.999995
AT5G64740.1	miR773b-3p	3248	6	0.24517	0.67499	no	CESA6	miR773b-3p:CESA6	0.999995
AT5G65670.2	miR5998a	817	6	0.534917	0.805773	no	IAA9	miR5998a:IAA9	0.999995
AT5G65930.3	miR393a-3p	3734	6	0.153789	0.552671	no	KCBP	miR393a-3p:KCBP	0.999995
AT5G65940.3	miR169a-3p	1165	6	0.196136	0.13308	no	CHY1	miR169a-3p:CHY1	0.999995
AT5G67520.1	miR5021	985	6	0.00222882	0.659658	no	APK4	miR5021:APK4	0.999995
ATCG00500.1	miR5638a	1234	6	0.470281	0.524101	no	ACCD	miR5638a:ACCD	0.999995

## Sheet: Col-0 (-Xrn1) (biorep #3)
Target transcript	miRNA	miRNA slice site position in target transcript	Allen score of sRNA:target duplex	Slice site RPM	Slice site RPM + 1/Maximum adjacent site RPM + 1	Previously verified by 5' RACE?	Target gene common name	Interaction name	P-value adjusted for multiple testing
AT1G12820.1	miR393a-5p	1894	4	3.27201	2.36123	yes	AFB3	miR393a-5p:AFB3	0
AT1G27340.1	miR394a	1382	1	0.140396	0.840479	yes	LCR	miR394a:LCR	0
AT1G27360.4	miR156j	1309	0	0.194995	0.702925	no	SPL11	miR156j:SPL11	0
AT1G27370.4	miR157a-5p	1325	2	0.194995	0.791945	no	SPL10	miR157a-5p:SPL10	0
AT1G31280.1	miR403-3p	3232	1	0.74488	0.74086	yes	AGO2	miR403-3p:AGO2	0
AT1G33120.1	miR5630a	309	0	0.39194	0.397495	no	NA	miR5630a:AT1G33120.1	0
AT1G33140.1	miR5630a	309	0	0.325641	0.428961	no	PGY2	miR5630a:PGY2	0
AT1G69170.1	miR156j	1306	0	0.399739	1.39974	yes	SPL6	miR156j:SPL6	0
AT1G70700.2	miR169d	787	2.5	0.411439	0.409215	no	JAZ9	miR169d:JAZ9	0
AT1G77850.1	miR160a-5p	1419	0.5	7.86414	8.86414	yes	ARF17	miR160a-5p:ARF17	0
AT2G02850.1	miR408-3p	107	1	0.341241	0.799961	yes	ARPN	miR408-3p:ARPN	0
AT2G22740.2	miR778	1185	1.5	0.349041	1.34904	yes	SDG23	miR778:SDG23	0
AT2G28350.1	miR160a-5p	1339	2	5.41111	6.41111	yes	ARF10	miR160a-5p:ARF10	0
AT2G33770.1	miR399a	750	1.5	0.403639	1.00418	yes	ATUBC24	miR399a:ATUBC24	0
AT2G42200.1	miR157a-5p	947	2	0.204745	0.998384	no	AtSPL9	miR157a-5p:AtSPL9	0
AT2G45160.1	miR171a-3p	1013	0	22.2314	12.2718	yes	ATHAM1	miR171a-3p:ATHAM1	0
AT3G23690.1	miR393a-5p	416	3	0.996424	1.99642	yes	NA	miR393a-5p:AT3G23690.1	0
AT3G25795.1	miR828	887	1	0.298342	1.29834	yes	TAS4	miR828:TAS4	0
AT3G26810.1	miR393a-5p	2009	4	1.24602	1.52797	yes	AFB2	miR393a-5p:AFB2	0
AT3G28850.1	miR414	1177	1.5	0.202795	1.2028	no	NA	miR414:AT3G28850.1	0
AT3G44860.1	miR163	330	3	0.655183	1.65518	yes	FAMT	miR163:FAMT	0
AT3G57230.2	miR824-5p	596	0.5	0.167696	0.95381	yes	AGL16	miR824-5p:AGL16	0
AT3G57920.1	miR157a-5p	855	2	0.39194	0.948196	no	SPL15	miR157a-5p:SPL15	0
AT3G60630.1	miR171a-3p	1055	0	15.6639	4.61728	yes	ATHAM2	miR171a-3p:ATHAM2	0
AT4G00150.1	miR171a-3p	866	0	5.44816	3.79296	yes	ATHAM3	miR171a-3p:ATHAM3	0
AT4G29520.1	miR414	779	1.5	0.491387	0.901041	no	NA	miR414:AT4G29520.1	0
AT4G36920.2	miR172c	1303	1	1.08027	1.46175	yes	AP2	miR172c:AP2	0
AT5G05100.1	miR854a	830	1	0.191095	0.890644	no	NA	miR854a:AT5G05100.1	0
AT5G06100.3	miR159a	1259	3.5	1.15437	2.15437	yes	ATMYB33	miR159a:ATMYB33	0
AT5G07680.2	miR164a	661	2.5	1.18167	1.88092	yes	ANAC079	miR164a:ANAC079	0
AT5G24890.1	miR414	772	1	0.286642	0.688163	no	NA	miR414:AT5G24890.1	0
AT5G39740.2	miR414	997	1.5	0.659083	0.509227	no	OLI7	miR414:OLI7	0
AT5G43270.3	miR157a-5p	1112	2	0.785829	0.831945	no	SPL2	miR157a-5p:SPL2	0
AT5G50570.2	miR156j	976	0	0.220344	1.01295	no	SPL13	miR156j:SPL13	0
AT5G50670.1	miR156j	1111	0	0.220344	1.01295	no	SPL13	miR156j:SPL13	0
AT5G57580.1	miR414	2139	1	0.76048	1.1652	no	NA	miR414:AT5G57580.1	0
AT5G60120.2	miR172a	1820	1	0.232044	1.0622	yes	TOE2	miR172a:TOE2	0
AT4G30080.1	miR160a-5p	1518	2.5	1.8232	1.91554	yes	ARF16	miR160a-5p:ARF16	0.00380149
AT1G30490.1	miR165a-3p	805	3	1.27332	1.75887	yes	ATHB9	miR165a-3p:ATHB9	0.00422772
AT2G27400.1	miR173-5p	378	2.5	4.09294	5.09294	yes	TAS1a	miR173-5p:TAS1a	0.00634199
AT2G39675.1	miR173-5p	378	2.5	17.3019	14.6692	yes	TAS1c	miR173-5p:TAS1c	0.00634199
AT2G39681.1	miR173-5p	417	2.5	9.6815	9.07176	yes	TAS2	miR173-5p:TAS2	0.00634199
AT5G61430.1	miR164a	850	2.5	1.35131	1.40896	yes	ANAC100	miR164a:ANAC100	0.0079989
AT3G52910.1	miR396a-5p	752	4	2.44524	2.38171	yes	AtGRF4	miR396a-5p:AtGRF4	0.00979971
AT1G63400.1	miR161.2	999	2	0.522586	1.18517	yes	NA	miR161.2:AT1G63400.1	0.0212028
AT2G34710.1	miR165a-3p	880	3	0.458238	1.12994	yes	ATHB-14	miR165a-3p:ATHB-14	0.024796
AT4G37740.1	miR396a-5p	920	4	0.926226	1.92623	yes	AtGRF2	miR396a-5p:AtGRF2	0.025922
AT1G06180.1	miR858a	402	3	0.413389	1.41339	yes	ATMYB13	miR858a:ATMYB13	0.0426128
AT2G22840.1	miR396a-5p	791	4	0.844328	1.84433	yes	AtGRF1	miR396a-5p:AtGRF1	0.0426128
AT3G15170.1	miR164a	674	2.5	0.183295	1.18329	yes	ANAC054	miR164a:ANAC054	0.0426128
AT3G17185.2	miR390a-5p	863	4.5	1.07247	2.07247	yes	TAS3a	miR390a-5p:TAS3a	0.0426128
AT1G63650.3	miR847	1726	3.5	0.534286	1.53429	no	AtEGL3	miR847:AtEGL3	0.0512615
AT2G36400.1	miR396a-5p	756	4	0.943775	1.69866	yes	AtGRF3	miR396a-5p:AtGRF3	0.0575647
AT5G53950.1	miR164a	811	2.5	0.157946	1.01539	yes	ANAC098	miR164a:ANAC098	0.0586021
AT1G50055.1	miR173-5p	373	4.5	7.73545	7.03454	yes	TAS1b	miR173-5p:TAS1b	0.0822761
AT1G47970.1	miR414	401	2	0.430939	0.763747	no	NA	miR414:AT1G47970.1	0.0829531
AT1G08125.3	miR390a-3p	887	5	3.94475	3.03027	no	NA	miR390a-3p:AT1G08125.3	0.0953482
AT3G62980.1	miR393a-5p	1721	2	0.74878	0.855078	yes	AtTIR1	miR393a-5p:AtTIR1	0.0953482
AT2G20280.1	miR414	1015	2	0.154046	0.61277	no	NA	miR414:AT2G20280.1	0.112181
AT1G54440.2	miR414	1932	2.5	0.216444	0.858289	no	NA	miR414:AT1G54440.2	0.113956
AT2G47460.1	miR858b	400	2.5	0.148196	0.824889	yes	ATMYB12	miR858b:ATMYB12	0.113956
AT4G26110.2	miR414	1111	2	0.208645	0.58873	no	ATNAP1;1	miR414:ATNAP1;1	0.113956
AT1G30330.2	miR167a-5p	3246	5	1.61651	1.56058	no	ARF6	miR167a-5p:ARF6	0.114269
AT5G60020.1	miR397a	752	2.5	0.413389	0.646691	yes	ATLAC17	miR397a:ATLAC17	0.114269
AT4G19100.1	miR414	345	2.5	0.202795	0.953621	no	PAM68	miR414:PAM68	0.11644
AT1G02816.1	miR5021	205	5	1.18557	1.85313	no	NA	miR5021:AT1G02816.1	0.119547
AT1G62910.1	miR161.2	996	3	0.136496	1.1365	yes	RFL9	miR161.2:RFL9	0.126298
AT1G62930.1	miR161.2	984	3	0.136496	1.1365	no	RPF3	miR161.2:RPF3	0.126298
AT5G58040.1	miR414	667	2.5	0.196945	0.811055	no	ATFIP1[V]	miR414:ATFIP1[V]	0.132058
AT2G28550.3	miR172a	1612	3	0.159896	1.1599	no	RAP2.7	miR172a:RAP2.7	0.147397
AT3G58110.2	miR414	1000	2.5	0.425089	0.745115	no	NA	miR414:AT3G58110.2	0.158376
AT2G45480.1	miR396a-5p	524	4	0.196945	1.19694	yes	AtGRF9	miR396a-5p:AtGRF9	0.162885
AT2G16900.3	miR414	965	2.5	0.161846	0.710312	no	NA	miR414:AT2G16900.3	0.167004
AT2G41900.1	miR5021	54	2	0.358791	1.00288	no	OXS2	miR5021:OXS2	0.167004
AT5G37780.3	miR414	638	2.5	0.653233	0.711368	no	ACAM-1	miR414:ACAM-1	0.167004
AT5G13630.2	miR395a	3577	2.5	0.212544	0.555291	no	ABAR	miR395a:ABAR	0.175523
AT5G23150.1	miR414	3237	3	0.202795	0.98878	no	HUA2	miR414:HUA2	0.178898
AT4G18390.2	miR319a	1136	2.5	0.251543	0.440266	yes	TCP2	miR319a:TCP2	0.184116
AT1G69770.1	miR823	2036	2.5	0.343191	0.893622	yes	CMT3	miR823:CMT3	0.191598
AT1G74260.1	miR5028	3488	5.5	0.807279	1.5875	no	PUR4	miR5028:PUR4	0.193099
AT1G11190.1	miR156h	153	3.5	0.269093	1.26909	no	BFN1	miR156h:BFN1	0.23336
AT1G53720.1	miR847	1311	3	0.214494	0.979554	no	ATCYP59	miR847:ATCYP59	0.23336
AT2G22370.1	miR157a-5p	515	3.5	0.189145	1.18914	no	NA	miR157a-5p:AT2G22370.1	0.23336
AT3G15270.1	miR156i	654	2	0.206695	0.603838	yes	SPL5	miR156i:SPL5	0.23336
AT3G20770.1	miR5015	1976	3.5	0.817029	1.08374	no	AtEIN3	miR5015:AtEIN3	0.23336
AT3G44110.2	miR414	1237	2.5	0.577185	0.363875	no	ATJ	miR414:ATJ	0.23336
AT2G03050.1	miR870-5p	875	2.5	0.446538	1.14864	no	EMB93	miR870-5p:EMB93	0.234522
AT3G09200.2	miR5662	663	3.5	2.32629	1.01246	no	NA	miR5662:AT3G09200.2	0.234522
AT3G50270.1	miR5020c	689	5	0.608384	1.34813	no	NA	miR5020c:AT3G50270.1	0.234522
AT5G37020.2	miR167c-5p	2379	3.5	0.939875	1.00505	yes	ARF8	miR167c-5p:ARF8	0.234522
AT4G10640.1	miR5662	433	6	0.487487	1.48749	no	IQD16	miR5662:IQD16	0.23913
AT5G63610.1	miR854a	150	5.5	0.489437	1.48944	no	ATCDK8	miR854a:ATCDK8	0.23913
AT3G57590.1	miR5661	634	5	0.317842	1.31784	no	NA	miR5661:AT3G57590.1	0.245322
AT1G63100.1	miR842	1837	4	0.255443	1.25544	no	NA	miR842:AT1G63100.1	0.273917
AT5G62700.1	miR774a	138	5	1.23627	1.45384	no	TUB3	miR774a:TUB3	0.281915
AT1G06950.1	miR414	2122	3	0.136496	0.86367	no	ATTIC110	miR414:ATTIC110	0.297747
AT5G08139.1	miR4221	1225	5.5	1.11732	1.51055	no	NA	miR4221:AT5G08139.1	0.304001
AT2G03510.1	miR8176	149	5.5	0.791679	1.37173	no	NA	miR8176:AT2G03510.1	0.316094
AT3G49010.5	miR5662	83	3.5	1.63406	0.946074	no	ATBBC1	miR5662:ATBBC1	0.316094
AT5G09730.1	miR2112-3p	1457	4	0.606434	1.05914	no	ATBX3	miR2112-3p:ATBX3	0.317893
AT2G35130.2	miR3434-5p	1859	6	0.982774	1.49571	no	NA	miR3434-5p:AT2G35130.2	0.322769
AT4G39710.2	miR5021	163	2.5	0.335391	1.06534	no	FKBP16-2	miR5021:FKBP16-2	0.340707
AT4G27340.1	miR835-3p	216	3.5	0.152096	1.1521	no	NA	miR835-3p:AT4G27340.1	0.37822
AT1G11200.1	miR856	784	3.5	0.235944	0.987536	no	NA	miR856:AT1G11200.1	0.398164
AT5G46880.1	miR414	373	4.5	0.243744	1.24374	no	HB-7	miR414:HB-7	0.409623
AT5G25890.1	miR847	282	5	0.74293	1.3948	no	IAA28	miR847:IAA28	0.412481
AT1G01300.1	miR8170-3p	1681	4	0.846278	1.05223	no	NA	miR8170-3p:AT1G01300.1	0.418531
AT1G63120.1	miR5658	1053	2	0.167696	0.661817	no	ATRBL2	miR5658:ATRBL2	0.418531
AT3G17880.2	miR397a	900	3.5	0.202795	0.821532	no	ATHIP2	miR397a:ATHIP2	0.418531
AT3G27200.1	miR398a-3p	268	5.5	1.64186	1.4431	no	NA	miR398a-3p:AT3G27200.1	0.418531
AT5G23000.1	miR858a	402	5.5	0.444588	1.44459	no	ATMYB37	miR858a:ATMYB37	0.418531
AT5G03670.1	miR859	1586	4.5	0.436789	1.21423	no	TRM28	miR859:TRM28	0.445908
AT1G52827.1	miR1887	256	3.5	0.403639	0.949857	no	ATCDT1	miR1887:ATCDT1	0.447627
AT1G57820.2	miR414	1860	4	0.608384	1.00487	no	ORTH2	miR414:ORTH2	0.448306
AT2G37340.3	miR842	1015	3	0.218394	0.574912	no	AT-RS2Z33	miR842:AT-RS2Z33	0.448306
AT3G22960.1	miR5658	320	3.5	0.75853	0.94747	no	PKP-ALPHA	miR5658:PKP-ALPHA	0.448306
AT4G40010.1	miR414	1009	3.5	0.161846	0.975444	no	SNRK2-7	miR414:SNRK2-7	0.451512
AT1G02910.1	miR5021	189	4	0.274943	1.27494	no	LPA1	miR5021:LPA1	0.451761
AT3G62590.1	miR414	616	3.5	0.146246	0.967096	no	NA	miR414:AT3G62590.1	0.4519
AT5G41340.1	miR414	697	3	0.401689	0.790071	no	ATUBC4	miR414:ATUBC4	0.4519
AT2G11910.2	miR414	313	3	0.571335	0.668281	no	NA	miR414:AT2G11910.2	0.478121
AT1G72320.3	miR158a-3p	2021	5.5	0.614234	1.26806	no	APUM23	miR158a-3p:APUM23	0.479746
AT4G26488.1	miR5655	14	5.5	0.286642	1.28664	no	NA	miR5655:AT4G26488.1	0.479939
AT3G06130.2	miR414	855	3	0.150146	0.648287	no	NA	miR414:AT3G06130.2	0.481288
AT5G19380.2	miR8181	1652	5	0.462138	1.29542	no	CLT1	miR8181:CLT1	0.48597
AT1G78080.1	miR5021	167	6	0.785829	1.50178	no	RAP2.4	miR5021:RAP2.4	0.492938
AT1G47970.1	miR414	638	3.5	0.481637	0.923435	no	NA	miR414:AT1G47970.1	0.495958
AT5G01810.3	miR5655	1728	3.5	0.0955475	1.09555	no	ATPK10	miR5655:ATPK10	0.495958
AT1G31580.1	miR5021	173	4	1.8076	1.14926	no	CXC750	miR5021:CXC750	0.497884
AT4G02060.2	miR829-5p	816	4.5	0.38609	1.13401	no	MCM7	miR829-5p:MCM7	0.497884
AT3G42660.1	miR414	1009	4.5	0.187195	1.1872	no	NA	miR414:AT3G42660.1	0.500877
AT3G18640.1	miR414	1902	4	0.183295	0.972749	no	NA	miR414:AT3G18640.1	0.503406
AT3G01500.3	miR5658	1175	2	0.998374	0.332648	no	ATBCA1	miR5658:ATBCA1	0.504255
AT1G79900.1	miR172c	725	4.5	0.185245	1.18525	no	ATMBAC2	miR172c:ATMBAC2	0.511322
AT4G23680.1	miR5658	557	2	0.501137	0.209203	no	NA	miR5658:AT4G23680.1	0.511322
AT3G28820.1	miR5998a	1362	3.5	0.898926	0.732297	no	NA	miR5998a:AT3G28820.1	0.513321
AT5G55920.1	miR414	281	3.5	0.152096	0.818518	no	OLI2	miR414:OLI2	0.513321
AT1G06040.2	miR1886.1	706	3.5	1.7452	0.855392	no	BBX24	miR1886.1:BBX24	0.526539
AT1G79530.1	miR447c-3p	1239	4	1.11927	0.892433	no	GAPCP-1	miR447c-3p:GAPCP-1	0.526539
AT2G01280.1	miR414	1883	5.5	0.230094	1.23009	no	MEE65	miR414:MEE65	0.526539
AT2G42910.1	miR3434-3p	1124	4	0.941825	0.965112	no	NA	miR3434-3p:AT2G42910.1	0.526539
AT3G06920.1	miR157a-3p	1005	5.5	0.37049	1.37049	no	NA	miR157a-3p:AT3G06920.1	0.526539
AT3G06340.3	miR870-3p	1640	6	0.719531	1.47752	no	NA	miR870-3p:AT3G06340.3	0.536005
AT2G32070.1	miR5654-5p	843	3.5	0.298342	0.988127	no	NA	miR5654-5p:AT2G32070.1	0.538168
AT1G10240.1	miR156a-5p	1643	5	0.185245	1.18525	no	FRS11	miR156a-5p:FRS11	0.539785
AT2G11910.2	miR414	502	3	0.561585	0.420864	no	NA	miR414:AT2G11910.2	0.539785
AT4G00780.1	miR397b	720	4.5	0.345141	1.0162	no	NA	miR397b:AT4G00780.1	0.539785
AT4G15350.1	miR172a	803	6	0.237894	1.23789	no	CYP705A2	miR172a:CYP705A2	0.540925
AT3G14560.1	miR824-5p	294	4.5	0.649333	1.16533	no	NA	miR824-5p:AT3G14560.1	0.555567
AT3G14930.3	miR831-3p	573	4	0.206695	0.888065	no	HEME1	miR831-3p:HEME1	0.571557
AT5G37470.1	miR840-3p	1847	5	0.148196	1.1482	no	NA	miR840-3p:AT5G37470.1	0.574505
AT1G18490.1	miR160c-3p	1219	6	0.487487	1.20352	no	NA	miR160c-3p:AT1G18490.1	0.578562
AT1G25410.1	miR861-3p	376	6	0.222294	1.22229	no	ATIPT6	miR861-3p:ATIPT6	0.578562
AT2G25760.2	miR8170-5p	2275	3	0.167696	0.648205	no	NA	miR8170-5p:AT2G25760.2	0.578562
AT3G45090.2	miR447a-3p	1343	4.5	0.206695	0.993578	no	NA	miR447a-3p:AT3G45090.2	0.578562
AT3G55660.1	miR414	1530	4	0.140396	0.91547	no	ATROPGEF6	miR414:ATROPGEF6	0.578562
AT4G36660.1	miR171a-3p	587	4.5	0.493337	0.992226	no	NA	miR171a-3p:AT4G36660.1	0.578562
AT5G02570.1	miR4243	142	3.5	0.206695	0.728182	no	NA	miR4243:AT5G02570.1	0.578562
AT5G17770.1	miR159b-5p	354	3.5	0.181345	0.666606	no	ATCBR	miR159b-5p:ATCBR	0.578562
AT5G48330.2	miR171a-3p	929	5.5	0.142346	1.14235	no	RUG2	miR171a-3p:RUG2	0.578562
AT4G38600.2	miR5021	5771	5	0.555735	1.17185	no	KAK	miR5021:KAK	0.587045
AT5G38300.1	miR414	714	6	0.454338	1.25385	no	NA	miR414:AT5G38300.1	0.587045
AT5G01600.1	miR164c-5p	534	3.5	0.132597	0.450666	no	ATFER1	miR164c-5p:ATFER1	0.58819
AT5G03530.1	miR870-3p	306	6	0.661033	1.44419	no	ATRAB	miR870-3p:ATRAB	0.588268
AT3G01160.1	miR414	812	3.5	0.140396	0.696368	no	NA	miR414:AT3G01160.1	0.591183
AT3G57870.1	miR397b	279	3.5	0.421189	0.552635	no	AHUS5	miR397b:AHUS5	0.591183
AT5G44200.2	miR414	905	3.5	0.38414	0.696029	no	ATCBP20	miR414:ATCBP20	0.591183
AT5G48600.2	miR837-5p	2731	4	0.144296	0.870888	no	ATCAP-C	miR837-5p:ATCAP-C	0.591183
AT3G25520.2	miR414	699	3.5	2.20149	0.684715	no	ATL5	miR414:ATL5	0.594989
AT2G06255.1	miR403-5p	317	5	0.538186	1.22331	no	ELF4-L3	miR403-5p:ELF4-L3	0.598246
AT1G20190.1	miR5640	924	5	1.28502	1.1237	no	ATEXP11	miR5640:ATEXP11	0.59941
AT4G37980.2	miR5644	984	3.5	0.335391	0.637747	no	ATCAD7	miR5644:ATCAD7	0.59941
AT5G58870.1	miR397b	2081	4	0.194995	0.840842	no	ftsh9	miR397b:ftsh9	0.59941
AT1G48410.3	miR168a-5p	531	5	0.547936	1.0701	yes	AGO1	miR168a-5p:AGO1	0.601644
AT5G47520.1	miR396b-5p	1041	5.5	0.618134	1.31754	no	AtRABA5a	miR396b-5p:AtRABA5a	0.602547
AT1G22700.3	miR5021	133	6	0.37439	1.37439	no	NA	miR5021:AT1G22700.3	0.605937
AT1G80930.1	miR414	860	4	0.140396	0.996592	no	NA	miR414:AT1G80930.1	0.605937
AT1G75860.1	miR841a-3p	473	5	0.579135	1.24049	no	NA	miR841a-3p:AT1G75860.1	0.610669
AT4G00820.1	miR5021	209	6	0.37049	1.37049	no	iqd17	miR5021:iqd17	0.613528
AT1G73670.1	miR5021	232	4	0.339291	1.03621	no	ATMPK15	miR5021:ATMPK15	0.619749
AT3G53320.1	miR844-3p	1334	5.5	0.272993	1.27299	no	NA	miR844-3p:AT3G53320.1	0.634003
AT4G21800.2	miR414	1284	4.5	0.38609	0.980685	no	QQT2	miR414:QQT2	0.64274
AT3G56110.2	miR854a	472	3.5	0.300292	0.707265	no	PRA1.B1	miR854a:PRA1.B1	0.64508
AT1G10120.1	miR396a-5p	1316	5.5	0.288592	1.12418	yes	NA	miR396a-5p:AT1G10120.1	0.651321
AT1G21810.1	miR773a	1288	5	0.296392	1.07433	no	NA	miR773a:AT1G21810.1	0.652643
AT1G66170.1	miR5021	195	5	0.257393	1.25739	no	MMD1	miR5021:MMD1	0.655872
AT3G15120.1	miR4227	5760	4	0.177445	0.889517	no	NA	miR4227:AT3G15120.1	0.665627
AT5G45950.1	miR159a	876	3.5	0.198895	0.504032	no	NA	miR159a:AT5G45950.1	0.665627
AT2G16940.3	miR414	1441	4	0.269093	0.950353	no	NA	miR414:AT2G16940.3	0.672687
AT3G03870.2	miR834	885	4	0.169646	0.91741	no	NA	miR834:AT3G03870.2	0.672687
AT3G06570.1	miR865-3p	1101	4.5	0.298342	1.07595	no	NA	miR865-3p:AT3G06570.1	0.672687
AT5G23530.1	miR780.2	406	5.5	1.00422	1.28345	no	AtCXE18	miR780.2:AtCXE18	0.672687
AT1G20550.1	miR1886.1	734	5.5	0.155996	1.156	no	NA	miR1886.1:AT1G20550.1	0.675361
AT4G07970.1	miR838	1510	6	0.218394	1.21839	no	NA	miR838:AT4G07970.1	0.675361
AT4G28530.2	miR414	312	4.5	0.308092	0.95583	no	anac074	miR414:anac074	0.675361
AT4G37680.2	miR419	479	4	0.200845	0.839201	no	HHP4	miR419:HHP4	0.675361
AT5G38970.3	miR393a-3p	1289	5.5	0.155996	1.156	no	ATBR6OX	miR393a-3p:ATBR6OX	0.675361
AT5G40730.1	miR414	90	3.5	0.214494	0.503165	no	AGP24	miR414:AGP24	0.675361
AT5G51080.3	miR5642a	161	5	0.210594	1.07071	no	NA	miR5642a:AT5G51080.3	0.675361
AT5G65670.2	miR172b-5p	1057	3.5	0.467988	0.701725	no	IAA9	miR172b-5p:IAA9	0.675361
AT3G46530.1	miR414	1457	5	0.183295	1.18329	no	RPP13	miR414:RPP13	0.678832
AT4G29670.2	miR169f-3p	704	6	1.33376	1.38069	no	ACHT2	miR169f-3p:ACHT2	0.678832
AT3G25410.1	miR774b-5p	289	5.5	0.150146	1.15015	no	NA	miR774b-5p:AT3G25410.1	0.684859
AT5G54430.1	miR414	735	3.5	0.311992	0.453443	no	ATPHOS32	miR414:ATPHOS32	0.684859
AT3G05490.1	miR868-3p	316	6	1.04517	1.22982	no	RALFL22	miR868-3p:RALFL22	0.690603
AT3G42790.1	miR414	725	3.5	0.294442	0.420458	no	AL3	miR414:AL3	0.690603
AT5G60820.1	miR776	854	5.5	0.411439	1.13128	no	NA	miR776:AT5G60820.1	0.690603
AT3G02750.3	miR5024-5p	2114	4	0.193045	1.01157	no	NA	miR5024-5p:AT3G02750.3	0.696514
AT5G59350.1	miR5021	1158	3	0.177445	0.952669	no	NA	miR5021:AT5G59350.1	0.696514
AT3G56050.2	miR831-3p	1524	4	0.308092	0.748838	no	NA	miR831-3p:AT3G56050.2	0.699533
AT5G17540.1	miR162a-3p	1315	6	0.327591	1.32759	no	NA	miR162a-3p:AT5G17540.1	0.706098
AT1G20030.2	miR390b-3p	795	4.5	0.165746	0.940236	no	NA	miR390b-3p:AT1G20030.2	0.708909
AT2G36130.1	miR168a-3p	269	5	0.481637	0.990871	no	NA	miR168a-3p:AT2G36130.1	0.71071
AT5G22320.2	miR847	1313	4	0.152096	0.783772	no	NA	miR847:AT5G22320.2	0.71071
AT5G61130.1	miR5021	106	5	0.967175	1.22308	no	PDCB1	miR5021:PDCB1	0.711476
AT1G79920.2	miR831-3p	1052	5	0.339291	1.14124	no	AtHsp70-15	miR831-3p:AtHsp70-15	0.714174
AT1G50170.1	miR5020c	155	4.5	0.274943	1.06516	no	ATSIRB	miR5020c:ATSIRB	0.715315
AT5G12100.1	miR400	1728	5	0.159896	1.1599	no	NA	miR400:AT5G12100.1	0.721227
AT1G34320.1	miR1886.1	100	5	0.267143	1.05865	no	NA	miR1886.1:AT1G34320.1	0.731503
AT1G80770.2	miR169d	807	5	0.310042	1.0244	no	PDE318	miR169d:PDE318	0.731503
AT3G51895.1	miR865-5p	1923	3.5	0.222294	0.587015	no	AST12	miR865-5p:AST12	0.731503
AT5G22650.2	miR414	587	4.5	1.10562	0.917573	no	ATHD2	miR414:ATHD2	0.737143
AT2G05170.1	miR397a	2740	4	0.263243	0.691514	no	ATVPS11	miR397a:ATVPS11	0.742614
AT3G26570.2	miR5021	212	3	0.183295	0.767334	no	ORF02	miR5021:ORF02	0.742614
AT5G64060.1	miR5021	199	4.5	0.399739	1.01413	no	anac103	miR5021:anac103	0.742614
AT1G52710.2	miR414	367	5.5	0.36854	1.09178	no	NA	miR414:AT1G52710.2	0.743439
AT3G12520.2	miR5638b	1469	6	0.263243	1.26324	no	SULTR4;2	miR5638b:SULTR4;2	0.747441
AT3G11420.1	miR774b-5p	646	4	0.165746	0.906038	no	NA	miR774b-5p:AT3G11420.1	0.749636
AT3G13810.3	miR5658	902	5	0.452388	1.18825	no	AtIDD11	miR5658:AtIDD11	0.749636
AT4G14930.1	miR1888a	1303	5	0.185245	1.18525	no	NA	miR1888a:AT4G14930.1	0.749636
AT3G59770.3	miR773b-3p	4831	5.5	0.596684	1.1128	no	AtSAC9	miR773b-3p:AtSAC9	0.757549
AT2G03220.1	miR158a-3p	1500	4	0.247643	0.8499	no	ATFT1	miR158a-3p:ATFT1	0.7593
AT2G40300.1	miR5655	886	3.5	0.241794	0.706155	no	ATFER4	miR5655:ATFER4	0.7593
AT4G25370.1	miR824-3p	564	4	0.327591	0.679587	no	NA	miR824-3p:AT4G25370.1	0.7593
AT5G65140.2	miR8172	535	6	0.491387	1.13505	no	TPPJ	miR8172:TPPJ	0.7593
AT1G01230.1	miR156g	264	4	0.181345	0.836979	no	NA	miR156g:AT1G01230.1	0.766303
AT2G39770.2	miR5022	832	5.5	0.976924	1.06402	no	CYT1	miR5022:CYT1	0.766303
AT5G62410.1	miR865-3p	24	6	0.152096	1.1521	no	ATCAP-E1	miR865-3p:ATCAP-E1	0.766303
AT1G71350.1	miR5666	215	4.5	0.142346	0.887851	no	NA	miR5666:AT1G71350.1	0.767311
AT1G78920.2	miR414	461	5.5	0.458238	1.07628	no	AtVHP2;1	miR414:AtVHP2;1	0.767311
AT2G30500.2	miR413	1510	4	0.37049	0.702951	no	NET4B	miR413:NET4B	0.767311
AT3G02930.2	miR5654-5p	1874	6	0.39584	1.16427	no	NA	miR5654-5p:AT3G02930.2	0.767311
AT3G48050.2	miR834	3561	4	0.198895	0.669146	no	SUO	miR834:SUO	0.767311
AT5G45040.1	miR5996	297	5	0.37829	0.977865	no	CYTC6A	miR5996:CYTC6A	0.767311
AT3G06060.1	miR8176	877	4.5	0.452388	0.800179	no	TSC10A	miR8176:TSC10A	0.771973
AT3G23810.1	miR172d-5p	976	3.5	0.249593	0.221448	no	ATSAHH2	miR172d-5p:ATSAHH2	0.771973
AT4G20930.1	miR868-3p	747	5	0.204745	0.987218	no	NA	miR868-3p:AT4G20930.1	0.771973
AT5G11460.1	miR5642a	853	6	0.159896	1.1599	no	NA	miR5642a:AT5G11460.1	0.771973
AT1G67230.1	miR414	3610	4	0.261293	0.845718	no	CRWN1	miR414:CRWN1	0.772964
AT4G16530.1	miR414	2242	6	0.674682	1.25408	no	NA	miR414:AT4G16530.1	0.772964
AT2G13800.1	miR4243	949	5	0.0682482	1.00551	no	ATSERK5	miR4243:ATSERK5	0.785682
AT2G16730.1	miR865-3p	2179	4	0.232044	0.825027	no	BGAL13	miR865-3p:BGAL13	0.78571
AT1G30590.1	miR5996	1546	4.5	0.193045	0.837172	no	NA	miR5996:AT1G30590.1	0.786399
AT1G45145.1	miR837-5p	390	5	1.40591	0.969359	no	ATH5	miR837-5p:ATH5	0.786399
AT1G53280.1	miR5642a	1320	4.5	1.43906	0.852744	no	AtDJ1B	miR5642a:AtDJ1B	0.786399
AT1G77810.2	miR5658	175	6	0.163796	1.1638	no	NA	miR5658:AT1G77810.2	0.786399
AT2G02780.1	miR5021	48	4	0.193045	0.940077	no	NA	miR5021:AT2G02780.1	0.786399
AT2G29670.1	miR5658	445	5	0.157946	1	no	NA	miR5658:AT2G29670.1	0.786399
AT2G35010.2	miR780.1	747	4.5	0.157946	0.821536	no	ATO1	miR780.1:ATO1	0.786399
AT3G15270.1	miR847	190	5	0.696132	0.977524	no	SPL5	miR847:SPL5	0.786399
AT3G47500.1	miR4239	213	4.5	0.198895	0.844745	no	CDF3	miR4239:CDF3	0.786399
AT4G35310.1	miR169f-3p	541	5	0.298342	0.969425	no	ATCPK5	miR169f-3p:ATCPK5	0.786399
AT5G64420.1	miR780.2	3043	5	0.189145	0.957602	no	NA	miR780.2:AT5G64420.1	0.786399
AT1G09600.1	miR781a	1484	4.5	0.140396	0.842902	no	NA	miR781a:AT1G09600.1	0.790418
AT1G54350.1	miR156h	1154	4.5	0.356841	0.919402	no	ABCD2	miR156h:ABCD2	0.790418
AT1G63670.3	miR172d-5p	2209	4.5	0.138446	0.843893	no	TRM12	miR172d-5p:TRM12	0.790418
AT1G67590.2	miR414	503	4	0.144296	0.655802	no	NA	miR414:AT1G67590.2	0.790418
AT1G72040.1	miR5656	1602	5.5	0.547936	1.02585	no	AtdNK	miR5656:AtdNK	0.790418
AT2G33850.1	miR5021	57	6	0.588885	1.09251	no	NA	miR5021:AT2G33850.1	0.790418
AT3G02750.3	miR172d-5p	1823	4	0.115047	0.723077	no	NA	miR172d-5p:AT3G02750.3	0.790418
AT3G11830.2	miR5021	1811	3	0.731231	0.642038	no	NA	miR5021:AT3G11830.2	0.790418
AT4G02725.2	miR4240	351	4	0.120897	0.660855	no	NA	miR4240:AT4G02725.2	0.790418
AT4G27310.1	miR157a-3p	767	4	0.204745	0.58683	no	BBX28	miR157a-3p:BBX28	0.790418
AT4G28770.2	miR414	887	4	0.284693	0.666948	no	NA	miR414:AT4G28770.2	0.790418
AT4G38980.1	miR414	758	4.5	0.140396	0.85648	no	NA	miR414:AT4G38980.1	0.790418
AT5G16510.2	miR865-3p	1065	4	0.163796	0.650264	no	RGP5	miR865-3p:RGP5	0.790418
AT1G09780.1	miR824-3p	1272	4.5	0.405589	0.781109	no	iPGAM1	miR824-3p:iPGAM1	0.801348
AT1G74850.1	miR164c-3p	1955	5	0.154046	0.945673	no	PDE343	miR164c-3p:PDE343	0.801348
AT2G27170.2	miR414	3344	4.5	0.154046	0.83612	no	SMC3	miR414:SMC3	0.801348
AT2G30260.1	miR857	329	4.5	0.148196	0.820293	no	U2B''	miR857:U2B''	0.801348
AT3G01120.1	miR773b-3p	1665	4	0.169646	0.512751	no	AtCGS1	miR773b-3p:AtCGS1	0.801348
AT3G06200.1	miR159b-5p	645	4.5	0.269093	0.790006	no	NA	miR159b-5p:AT3G06200.1	0.801348
AT3G20250.1	miR2112-5p	2569	5	0.210594	0.968791	no	APUM5	miR2112-5p:APUM5	0.801348
AT3G54540.1	miR414	914	5	0.267143	0.954468	no	ABCF4	miR414:ABCF4	0.801348
AT4G03390.1	miR5021	505	6	0.38414	1.08731	no	SRF3	miR5021:SRF3	0.801348
AT4G32520.2	miR393a-3p	1036	4.5	0.226194	0.845396	no	AtSHMT3	miR393a-3p:AtSHMT3	0.801348
AT5G19120.1	miR5658	412	4	0.235944	0.734596	no	NA	miR5658:AT5G19120.1	0.801348
AT5G41350.1	miR834	391	6	0.604484	1.13052	no	NA	miR834:AT5G41350.1	0.801348
AT5G53000.1	miR414	1239	4	0.138446	0.602615	no	TAP46	miR414:TAP46	0.801348
ATCG01250.1	miR167a-3p	677	4.5	0.0467988	0.801443	no	NDHB.2	miR167a-3p:NDHB.2	0.801348
AT3G60750.2	miR5021	274	3	0.171595	0.577818	no	NA	miR5021:AT3G60750.2	0.805761
AT3G52260.3	miR413	801	6	0.175495	1.10645	no	NA	miR413:AT3G52260.3	0.809295
AT5G53460.3	miR172d-5p	2128	5	0.354891	0.955974	no	GLT1	miR172d-5p:GLT1	0.809295
AT2G44180.1	miR414	705	4.5	0.154046	0.827932	no	MAP2A	miR414:MAP2A	0.81335
AT2G38680.1	miR414	784	4.5	0.169646	0.983603	no	NA	miR414:AT2G38680.1	0.814811
AT1G35310.1	miR414	288	4.5	2.29899	0.823344	no	MLP168	miR414:MLP168	0.814898
AT4G09010.1	miR5630a	977	4	0.159896	0.390097	no	APX4	miR5630a:APX4	0.814898
AT5G03160.1	miR4221	1475	4.5	0.39584	0.785911	no	ATP58IPK	miR4221:ATP58IPK	0.814898
AT1G20760.1	miR161.1	292	5.5	0.282743	1.18778	no	NA	miR161.1:AT1G20760.1	0.815858
AT4G27310.1	miR414	582	5	0.409489	1.11063	no	BBX28	miR414:BBX28	0.815858
AT1G13160.1	miR414	1809	5	0.237894	0.932436	no	NA	miR414:AT1G13160.1	0.819273
AT2G26430.3	miR169a-3p	545	5	0.0857977	0.931419	no	ATRCY1	miR169a-3p:ATRCY1	0.819273
AT3G07990.1	miR865-5p	1554	4.5	0.206695	0.838718	no	SCPL27	miR865-5p:SCPL27	0.819273
AT3G44750.2	miR414	472	4.5	0.645433	0.815431	no	ATHD2A	miR414:ATHD2A	0.819273
AT4G00620.1	miR847	659	5	0.220344	0.934312	no	EMB3127	miR847:EMB3127	0.819273
AT4G20720.1	miR414	1652	4.5	0.202795	0.820439	no	NA	miR414:AT4G20720.1	0.819273
AT4G25210.1	miR864-3p	589	4	0.269093	0.673857	no	NA	miR864-3p:AT4G25210.1	0.819273
AT5G40580.3	miR5015	315	5.5	0.559635	0.995024	no	PBB2	miR5015:PBB2	0.819503
AT3G19340.1	miR5021	97	4	0.169646	0.896836	no	NA	miR5021:AT3G19340.1	0.81951
AT4G32260.1	miR5021	895	3	0.315892	0.822132	no	PDE334	miR5021:PDE334	0.819798
AT2G23350.1	miR156f-3p	1923	4	0.181345	0.524152	no	PAB4	miR156f-3p:PAB4	0.823946
AT3G48460.1	miR394a	811	4	0.175495	0.545139	no	NA	miR394a:AT3G48460.1	0.823946
AT1G54270.2	miR838	1447	4	0.38219	0.758246	no	EIF4A-2	miR838:EIF4A-2	0.824145
AT1G80830.1	miR398b-5p	1326	5	0.111147	1.11115	no	ATNRAMP1	miR398b-5p:ATNRAMP1	0.824145
AT3G05410.2	miR5651	546	6	0.235944	1.23594	no	NA	miR5651:AT3G05410.2	0.824145
AT5G26000.2	miR4227	851	4	1.8973	0.852049	no	AtTGG1	miR4227:AtTGG1	0.824145
AT1G14670.1	miR5658	1537	4	0.198895	0.656991	no	NA	miR5658:AT1G14670.1	0.827117
AT1G20090.1	miR5021	124	4	0.339291	0.880744	no	ARAC4	miR5021:ARAC4	0.827117
AT1G63295.1	miR829-5p	403	6	0.109197	1.1092	no	NA	miR829-5p:AT1G63295.1	0.827117
AT1G78080.1	miR1886.3	388	6	0.403639	1.08273	no	RAP2.4	miR1886.3:RAP2.4	0.827117
AT2G19400.1	miR824-3p	1502	5	0.196945	0.888541	no	NA	miR824-3p:AT2G19400.1	0.827117
AT3G52940.2	miR780.1	173	5	0.200845	0.904529	no	ELL1	miR780.1:ELL1	0.827117
AT4G24040.1	miR5021	208	5	0.155996	0.991636	no	ATTRE1	miR5021:ATTRE1	0.827117
AT4G38040.1	miR394b-3p	740	5.5	0.136496	0.993184	no	NA	miR394b-3p:AT4G38040.1	0.827117
AT5G13220.4	miR841a-5p	464	4	0.175495	0.576415	no	JAS1	miR841a-5p:JAS1	0.827117
AT5G63490.1	miR158a-5p	1280	4.5	0.181345	0.795231	no	NA	miR158a-5p:AT5G63490.1	0.827117
AT3G14110.3	miR396b-5p	773	4.5	0.315892	0.937486	no	FLU	miR396b-5p:FLU	0.827995
AT3G22420.2	miR5016	314	6	0.245694	1.24569	no	ATWNK2	miR5016:ATWNK2	0.827995
AT3G23780.2	miR774b-3p	713	5	0.247643	1.0811	no	DMS2	miR774b-3p:DMS2	0.827995
AT3G53310.1	miR824-3p	900	5	0.545986	1.05453	no	NA	miR824-3p:AT3G53310.1	0.827995
AT1G11130.1	miR5021	163	4	0.169646	0.877164	no	SCM	miR5021:SCM	0.828441
AT1G62480.1	miR838	428	4	0.185245	0.268261	no	NA	miR838:AT1G62480.1	0.828441
AT1G64840.1	miR3440b-5p	820	5.5	0.311992	0.986801	no	NA	miR3440b-5p:AT1G64840.1	0.828441
AT2G11910.2	miR414	442	4	0.296392	0.384112	no	NA	miR414:AT2G11910.2	0.828441
AT3G02950.1	miR837-5p	599	4.5	0.185245	0.738708	no	AtTHO7	miR837-5p:AtTHO7	0.828441
AT3G11250.1	miR5662	764	4	0.0994474	0.530002	no	NA	miR5662:AT3G11250.1	0.828441
AT3G16170.1	miR858b	1565	4.5	0.134546	0.724725	no	AAE13	miR858b:AAE13	0.828441
AT3G49601.1	miR172d-5p	1008	4	0.120897	0.56699	no	NA	miR172d-5p:AT3G49601.1	0.828441
AT3G53030.1	miR396b-5p	1624	4.5	0.251543	0.749951	no	SRPK4	miR396b-5p:SRPK4	0.828441
AT4G14340.1	miR861-3p	1075	5.5	0.196945	0.988725	no	CKI1	miR861-3p:CKI1	0.828441
AT4G25730.1	miR414	1554	4.5	0.360741	0.772937	no	NA	miR414:AT4G25730.1	0.828441
AT5G24130.1	miR865-3p	982	5.5	0.185245	0.988615	no	NA	miR865-3p:AT5G24130.1	0.828441
AT5G42530.1	miR5021	97	4	0.185245	0.877315	no	NA	miR5021:AT5G42530.1	0.828441
AT3G09840.1	miR156h	959	4.5	0.161846	0.853833	no	ATCDC48	miR156h:ATCDC48	0.832142
AT1G07320.4	miR414	870	4	0.440688	0.712587	no	EMB2784	miR414:EMB2784	0.832895
AT1G58070.1	miR5021	385	5	0.169646	1.16965	no	NA	miR5021:AT1G58070.1	0.832895
AT1G15690.2	miR414	2086	4	0.38999	0.285038	no	AtAVP1	miR414:AtAVP1	0.835921
AT1G22400.1	miR157a-3p	1371	6	0.571335	1.22312	no	ATUGT85A1	miR157a-3p:ATUGT85A1	0.844612
AT1G24735.2	miR5015	1003	5.5	0.140396	1.1404	no	NA	miR5015:AT1G24735.2	0.844612
AT1G70780.1	miR172d-5p	414	4	0.505037	0.753131	no	NA	miR172d-5p:AT1G70780.1	0.844612
AT1G70782.1	miR172d-5p	414	4	0.505037	0.753131	no	CPuORF28	miR172d-5p:CPuORF28	0.844612
AT2G02220.1	miR5649a	977	6	0.247643	1.24764	no	ATPSKR1	miR5649a:ATPSKR1	0.844612
AT3G24800.1	miR5999	505	5.5	0.155996	1.156	no	PRT1	miR5999:PRT1	0.844612
AT3G62640.1	miR5653	162	5	0.130647	0.946152	no	NA	miR5653:AT3G62640.1	0.844612
AT4G31340.2	miR156j	1410	5	1.12707	1.11102	no	NA	miR156j:AT4G31340.2	0.844612
AT4G33740.3	miR414	700	6	0.200845	1.20084	no	NA	miR414:AT4G33740.3	0.844612
AT5G55910.1	miR5021	175	4.5	0.497237	1.06817	no	D6PK	miR5021:D6PK	0.844612
AT2G13790.1	miR4243	1160	5	0.0682482	1.06825	no	ATSERK4	miR4243:ATSERK4	0.845805
AT2G19470.1	miR399a	889	4.5	0.175495	0.664767	no	ckl5	miR399a:ckl5	0.847512
AT3G27830.1	miR418	201	4	0.167696	0.285046	no	RPL12	miR418:RPL12	0.847512
AT3G52560.4	miR5652	453	4.5	0.458238	0.699019	no	MMZ4	miR5652:MMZ4	0.847512
AT3G20790.1	miR4239	201	5.5	0.196945	0.969976	no	NA	miR4239:AT3G20790.1	0.85276
AT5G18800.2	miR5656	140	4.5	0.218394	0.748453	no	NA	miR5656:AT5G18800.2	0.85276
AT5G41770.1	miR829-5p	1968	4.5	0.36464	0.762484	no	NA	miR829-5p:AT5G41770.1	0.85276
AT5G62690.1	miR774a	179	5	0.686382	0.8702	no	TUB2	miR774a:TUB2	0.853729
AT4G35730.1	miR5658	1013	5	0.226194	0.933218	no	NA	miR5658:AT4G35730.1	0.855738
AT5G50570.2	miR5658	1256	4.5	0.076048	0.815316	no	SPL13	miR5658:SPL13	0.855738
AT5G50670.1	miR5658	1391	4.5	0.076048	0.815316	no	SPL13	miR5658:SPL13	0.855738
AT5G24930.1	miR847	1463	4.5	0.232044	0.874107	no	ATCOL4	miR847:ATCOL4	0.860281
AT4G01883.1	miR5021	215	5	0.177445	0.964847	no	NA	miR5021:AT4G01883.1	0.861057
AT1G17840.1	miR1886.1	237	5	0.267143	1.07263	no	ABCG11	miR1886.1:ABCG11	0.86149
AT2G35650.1	miR167c-5p	287	6	0.193045	1.04617	no	ATCSLA07	miR167c-5p:ATCSLA07	0.861754
AT3G51150.2	miR166a-5p	835	5.5	0.179395	0.918036	no	NA	miR166a-5p:AT3G51150.2	0.862156
AT1G15670.1	miR414	1019	4.5	0.189145	0.731361	no	NA	miR414:AT1G15670.1	0.86349
AT5G37540.1	miR5021	77	6	0.586935	1.0175	no	NA	miR5021:AT5G37540.1	0.86349
AT1G06420.2	miR858a	170	6	0.430939	1.18968	no	NA	miR858a:AT1G06420.2	0.866506
AT1G36160.2	miR5998a	5888	6	0.493337	1.1932	no	ACC1	miR5998a:ACC1	0.866506
AT4G02720.1	miR3434-5p	212	4.5	0.165746	0.853033	no	NA	miR3434-5p:AT4G02720.1	0.866506
AT4G34588.1	miR1886.1	540	4.5	0.212544	0.94241	no	CPuORF2	miR1886.1:CPuORF2	0.866506
AT4G34590.1	miR1886.1	540	4.5	0.212544	0.94241	no	ATB2	miR1886.1:ATB2	0.866506
AT5G01610.1	miR407	269	5.5	0.450438	1.13073	no	NA	miR407:AT5G01610.1	0.866506
AT5G40490.1	miR4227	1194	5	0.187195	1.01332	no	NA	miR4227:AT5G40490.1	0.866506
AT5G56600.2	miR397b	138	5	0.454338	0.989387	no	PFN3	miR397b:PFN3	0.866506
AT5G07140.1	miR168a-3p	1253	6	0.148196	0.993253	no	NA	miR168a-3p:AT5G07140.1	0.870049
AT1G67720.1	miR780.1	2930	5	0.161846	0.99499	no	NA	miR780.1:AT1G67720.1	0.871739
AT4G37180.2	miR847	1082	6	0.425089	1.1734	no	NA	miR847:AT4G37180.2	0.871739
AT1G25490.1	miR414	316	6	0.434839	1.0194	no	ATB BETA BETA	miR414:ATB BETA BETA	0.872855
AT5G05110.1	miR853	731	6	0.700032	1.15347	no	NA	miR853:AT5G05110.1	0.876485
AT5G08280.1	miR847	1357	4.5	0.128697	0.783443	no	HEMC	miR847:HEMC	0.876485
AT1G49180.2	miR774b-5p	282	6	0.179395	1.17939	no	NA	miR774b-5p:AT1G49180.2	0.876788
AT2G19540.1	miR395a	295	5	0.196945	0.948983	no	NA	miR395a:AT2G19540.1	0.876788
AT5G22080.2	miR158a-5p	762	5	0.288592	0.959351	no	NA	miR158a-5p:AT5G22080.2	0.876788
AT1G75040.1	miR166a-5p	791	5.5	0.150146	0.904884	no	PR-5	miR166a-5p:PR-5	0.87831
AT2G36380.1	miR5657	4278	6	0.460188	1.02885	no	ABCG34	miR5657:ABCG34	0.87831
AT3G13430.3	miR857	889	6	0.458238	1.02889	no	NA	miR857:AT3G13430.3	0.87831
AT3G28810.1	miR5998a	1295	4.5	0.542086	0.67086	no	NA	miR5998a:AT3G28810.1	0.87831
AT5G03455.1	miR5646	290	5	0.286642	0.82807	no	ACR2	miR5646:ACR2	0.880762
AT1G53320.1	miR5013	959	4.5	0.198895	0.698014	no	AtTLP7	miR5013:AtTLP7	0.881427
AT1G01080.2	miR447c-3p	513	5.5	0.311992	1.05819	no	NA	miR447c-3p:AT1G01080.2	0.88163
AT1G78600.2	miR5658	701	5	0.220344	1.0016	no	BBX22	miR5658:BBX22	0.88163
AT1G71030.1	miR858a	342	4.5	0.179395	0.74594	no	ATMYBL2	miR858a:ATMYBL2	0.886731
AT1G26580.1	miR418	1506	5	0.265193	0.981841	no	NA	miR418:AT1G26580.1	0.887135
AT1G35620.1	miR157c-3p	1137	5.5	0.497237	1.03505	no	ATPDI8	miR157c-3p:ATPDI8	0.887135
AT1G72440.1	miR414	2929	4.5	0.276893	0.776022	no	EDA25	miR414:EDA25	0.887135
AT2G18960.1	miR419	2243	5.5	0.637633	1.08529	no	AHA1	miR419:AHA1	0.887135
AT2G28315.1	miR5015	556	6	0.136496	1.1365	no	NA	miR5015:AT2G28315.1	0.887135
AT2G32920.1	miR832-5p	123	5	0.200845	0.94914	no	ATPDI9	miR832-5p:ATPDI9	0.887135
AT2G43790.1	miR5662	340	5	0.179395	0.961834	no	ATMAPK6	miR5662:ATMAPK6	0.887135
AT3G57870.1	miR172b-5p	207	4	0.189145	0.360457	no	AHUS5	miR172b-5p:AHUS5	0.887135
AT4G28397.2	miR780.2	193	4.5	0.319792	0.730265	no	NA	miR780.2:AT4G28397.2	0.887135
AT4G33680.1	miR5665	738	5	0.280793	0.957716	no	AGD2	miR5665:AGD2	0.887135
AT5G62640.3	miR827	1369	5	0.171595	0.990112	no	AtELF5	miR827:AtELF5	0.887135
AT3G19910.1	miR8183	449	6	0.136496	1.1365	no	NA	miR8183:AT3G19910.1	0.887244
AT5G25350.1	miR5658	2042	5	0.327591	0.988386	no	EBF2	miR5658:EBF2	0.887244
AT1G03530.1	miR414	750	5.5	0.132597	0.934067	no	ATNAF1	miR414:ATNAF1	0.888844
AT1G11410.1	miR864-5p	1480	6	0.409489	0.994497	no	NA	miR864-5p:AT1G11410.1	0.888844
AT1G17130.2	miR414	1116	4.5	0.224244	0.647362	no	NA	miR414:AT1G17130.2	0.888844
AT1G22070.1	miR8170-3p	1275	5	0.220344	0.851667	no	TGA3	miR8170-3p:TGA3	0.888844
AT2G01720.1	miR403-3p	849	6	0.37829	1.02464	no	NA	miR403-3p:AT2G01720.1	0.888844
AT2G36580.1	miR169f-3p	1402	6	0.432889	1.0041	no	NA	miR169f-3p:AT2G36580.1	0.888844
AT3G01500.3	miR5658	1200	4	0.822878	0.303435	no	ATBCA1	miR5658:ATBCA1	0.888844
AT3G03470.1	miR5021	163	4	0.194995	0.821676	no	CYP89A9	miR5021:CYP89A9	0.888844
AT3G26560.1	miR414	606	5.5	0.155996	0.939762	no	NA	miR414:AT3G26560.1	0.888844
AT3G27810.1	miR858a	499	5	0.76048	0.823878	no	ATMYB21	miR858a:ATMYB21	0.888844
AT3G52930.1	miR863-5p	351	4.5	0.417289	0.654314	no	AtFBA8	miR863-5p:AtFBA8	0.888844
AT3G61250.1	miR858b	603	5	0.150146	0.80377	no	AtMYB17	miR858b:AtMYB17	0.888844
AT4G02930.1	miR8172	214	6	0.524536	0.978719	no	NA	miR8172:AT4G02930.1	0.888844
AT4G08320.2	miR834	306	6	0.271043	1.014	no	TPR8	miR834:TPR8	0.888844
AT4G17950.1	miR4221	1390	5.5	0.222294	0.93441	no	NA	miR4221:AT4G17950.1	0.888844
AT4G20530.1	miR5638a	669	5.5	0.0506987	0.940646	no	NA	miR5638a:AT4G20530.1	0.888844
AT4G20540.1	miR5638a	669	5.5	0.0506987	0.940646	no	NA	miR5638a:AT4G20540.1	0.888844
AT4G20550.1	miR5638a	714	5.5	0.0506987	0.940646	no	NA	miR5638a:AT4G20550.1	0.888844
AT4G20560.1	miR5638a	714	5.5	0.0506987	0.940646	no	NA	miR5638a:AT4G20560.1	0.888844
AT4G20570.1	miR5638a	714	5.5	0.0506987	0.940646	no	NA	miR5638a:AT4G20570.1	0.888844
AT4G20580.1	miR5638a	714	5.5	0.0506987	0.940646	no	NA	miR5638a:AT4G20580.1	0.888844
AT4G20590.1	miR5638a	714	5.5	0.0506987	0.940646	no	NA	miR5638a:AT4G20590.1	0.888844
AT4G20600.1	miR5638a	714	5.5	0.0506987	0.940646	no	NA	miR5638a:AT4G20600.1	0.888844
AT4G20610.1	miR5638a	714	5.5	0.0506987	0.940646	no	NA	miR5638a:AT4G20610.1	0.888844
AT4G20620.1	miR5638a	714	5.5	0.0506987	0.940646	no	NA	miR5638a:AT4G20620.1	0.888844
AT4G20630.1	miR5638a	669	5.5	0.0506987	0.940646	no	NA	miR5638a:AT4G20630.1	0.888844
AT4G20640.1	miR5638a	714	5.5	0.0506987	0.940646	no	NA	miR5638a:AT4G20640.1	0.888844
AT4G20650.1	miR5638a	669	5.5	0.0506987	0.940646	no	NA	miR5638a:AT4G20650.1	0.888844
AT4G27320.1	miR414	922	4.5	0.294442	0.655422	no	ATPHOS34	miR414:ATPHOS34	0.888844
AT5G07280.1	miR156d-3p	2612	6	0.171595	1.00334	no	EMS1	miR156d-3p:EMS1	0.888844
AT5G13770.1	miR414	1280	5	0.155996	0.838718	no	NA	miR414:AT5G13770.1	0.888844
AT5G18280.2	miR171c-5p	346	5.5	0.173545	0.960117	no	APY2	miR171c-5p:APY2	0.888844
AT5G38470.2	miR5021	1273	3.5	0.150146	0.529078	no	RAD23D	miR5021:RAD23D	0.888844
AT5G56910.1	miR5662	452	4.5	0.0955475	0.672184	no	NA	miR5662:AT5G56910.1	0.888844
AT5G62460.1	miR858b	371	5.5	0.329541	0.93938	no	NA	miR858b:AT5G62460.1	0.888844
AT5G65710.1	miR831-3p	2865	5.5	0.124797	0.921705	no	HSL2	miR831-3p:HSL2	0.888844
AT5G60360.3	miR396b-5p	627	5.5	0.659083	1.04418	no	AALP	miR396b-5p:AALP	0.890984
AT5G65630.1	miR774b-5p	1042	5.5	0.230094	0.940373	no	GTE7	miR774b-5p:GTE7	0.891155
AT1G53910.3	miR396a-5p	591	6	0.618134	0.976466	no	RAP2.12	miR396a-5p:RAP2.12	0.891987
AT5G16290.2	miR826b	1353	5.5	0.670782	1.07261	no	VAT1	miR826b:VAT1	0.900167
AT1G63490.1	miR5636	629	6	0.247643	0.996884	no	NA	miR5636:AT1G63490.1	0.905224
AT3G43860.1	miR398a-3p	668	6	0.206695	0.977878	no	AtGH9A4	miR398a-3p:AtGH9A4	0.905224
AT1G29930.1	miR842	223	4.5	2.20149	0.504739	no	AB140	miR842:AB140	0.907108
AT4G38950.2	miR414	1661	5	0.144296	0.825557	no	NA	miR414:AT4G38950.2	0.907108
AT3G29360.2	miR172d-5p	226	5	0.124797	0.806948	no	UGD2	miR172d-5p:UGD2	0.912606
AT1G59990.1	miR3434-3p	1402	6	0.185245	0.980639	no	EMB3108	miR3434-3p:EMB3108	0.913095
AT2G33430.1	miR156j	113	6	0.216444	0.979586	no	DAL	miR156j:DAL	0.913095
AT5G24870.2	miR414	1847	5	0.302242	0.93425	no	NA	miR414:AT5G24870.2	0.913103
AT2G43650.1	miR414	346	5.5	0.235944	0.912209	no	EMB2777	miR414:EMB2777	0.916998
AT3G13060.2	miR5015	1239	6	0.356841	1.12081	no	ECT5	miR5015:ECT5	0.918443
AT1G80020.1	miR167a-3p	1188	5.5	0.154046	0.905175	no	NA	miR167a-3p:AT1G80020.1	0.919363
AT2G25670.2	miR414	655	4.5	0.142346	0.58128	no	NA	miR414:AT2G25670.2	0.919363
AT2G45030.1	miR837-5p	2075	6	0.467988	0.984311	no	NA	miR837-5p:AT2G45030.1	0.919363
AT3G56190.2	miR5663-5p	872	4.5	0.313942	0.52568	no	ALPHA-SNAP2	miR5663-5p:ALPHA-SNAP2	0.919363
AT4G38740.1	miR776	534	6	3.13747	0.987894	no	ROC1	miR776:ROC1	0.919363
AT5G59180.1	miR866-3p	327	5.5	0.175495	0.916392	no	NRPB7	miR866-3p:NRPB7	0.919363
AT2G20010.2	miR5661	2380	5	0.179395	0.82197	no	NA	miR5661:AT2G20010.2	0.922316
AT2G36470.1	miR837-5p	1524	6	0.179395	0.980545	no	NA	miR837-5p:AT2G36470.1	0.923147
AT2G36990.1	miR390a-3p	1611	5	0.296392	0.778645	no	ATSIG6	miR390a-3p:ATSIG6	0.923147
AT5G67510.1	miR5021	504	3.5	0.193045	0.362927	no	NA	miR5021:AT5G67510.1	0.923147
AT3G29030.1	miR859	287	5	0.255443	0.929276	no	ATEXP5	miR859:ATEXP5	0.923396
AT1G06960.3	miR5662	708	5	0.0994474	0.795439	no	NA	miR5662:AT1G06960.3	0.923804
AT1G07920.1	miR414	1280	4.5	1.10562	0.466686	no	NA	miR414:AT1G07920.1	0.923804
AT1G07930.2	miR414	1061	4.5	1.12317	0.51051	no	NA	miR414:AT1G07930.2	0.923804
AT1G07940.2	miR414	1411	4.5	2.21319	0.484681	no	NA	miR414:AT1G07940.2	0.923804
AT1G11840.6	miR156h	1209	4	0.177445	0.385384	no	ATGLX1	miR156h:ATGLX1	0.923804
AT1G14280.1	miR5021	136	6	0.167696	0.973977	no	PKS2	miR5021:PKS2	0.923804
AT1G22850.1	miR414	1074	4.5	0.136496	0.542255	no	NA	miR414:AT1G22850.1	0.923804
AT1G23240.3	miR5021	569	3.5	0.493337	0.239261	no	NA	miR5021:AT1G23240.3	0.923804
AT1G27310.1	miR8174	187	5.5	0.610334	0.883402	no	NTF2A	miR8174:NTF2A	0.923804
AT1G65840.1	miR5021	1998	5.5	0.177445	0.926361	no	ATPAO4	miR5021:ATPAO4	0.923804
AT2G25190.1	miR5021	878	4	0.00194995	0.714816	no	NA	miR5021:AT2G25190.1	0.923804
AT2G32890.1	miR414	1008	5	0.471888	0.80487	no	RALFL17	miR414:RALFL17	0.923804
AT3G01460.1	miR5017-5p	5696	6	0.171595	0.969346	no	ATMBD9	miR5017-5p:ATMBD9	0.923804
AT3G04730.1	miR391-3p	784	4.5	0.140396	0.266459	no	IAA16	miR391-3p:IAA16	0.923804
AT3G05040.1	miR169a-5p	3343	5	0.173545	0.752448	no	HST	miR169a-5p:HST	0.923804
AT3G09740.1	miR833b	248	5	0.212544	0.761273	no	ATSYP71	miR833b:ATSYP71	0.923804
AT3G11130.1	miR390b-3p	3787	5	0.179395	0.777588	no	NA	miR390b-3p:AT3G11130.1	0.923804
AT3G13445.2	miR1886.1	800	5	0.148196	0.82837	no	TBP1	miR1886.1:TBP1	0.923804
AT4G16442.1	miR5021	763	4	0.175495	0.72997	no	NA	miR5021:AT4G16442.1	0.923804
AT5G04600.1	miR5021	125	4	0.191095	0.717924	no	NA	miR5021:AT5G04600.1	0.923804
AT5G15020.2	miR414	3260	5	0.165746	0.785762	no	SNL2	miR414:SNL2	0.923804
AT5G22650.2	miR414	638	5	0.791679	0.780766	no	ATHD2	miR414:ATHD2	0.923804
AT5G23940.1	miR3440b-3p	713	4.5	0.329541	0.441649	no	DCR	miR3440b-3p:DCR	0.923804
AT5G28913.1	miR169d	263	5	0.212544	0.775514	no	SADHU4-1	miR169d:SADHU4-1	0.923804
AT5G35680.3	miR414	514	4.5	0.428989	0.466228	no	NA	miR414:AT5G35680.3	0.923804
AT5G55280.1	miR5021	171	5	0.185245	0.895409	no	ATFTSZ1-1	miR5021:ATFTSZ1-1	0.923804
ATCG00890.1	miR167a-3p	677	4.5	0.526486	0.402934	no	NDHB.1	miR167a-3p:NDHB.1	0.923804
AT5G64640.1	miR156a-5p	1370	5	0.226194	0.824339	no	NA	miR156a-5p:AT5G64640.1	0.924764
AT5G66440.1	miR414	614	5	0.154046	0.926428	no	NA	miR414:AT5G66440.1	0.924849
AT4G32640.2	miR407	2990	5.5	0.233994	1.04803	no	NA	miR407:AT4G32640.2	0.92503
AT1G08660.2	miR5014b	1141	5.5	0.239844	1.03416	no	MGP2	miR5014b:MGP2	0.926283
AT2G27228.1	miR776	290	5.5	0.181345	1.01338	no	CPuORF6	miR776:CPuORF6	0.926283
AT2G27230.2	miR776	289	5.5	0.181345	1.01338	no	LHW	miR776:LHW	0.926283
AT5G49890.1	miR831-5p	2172	5	0.169646	0.952369	no	ATCLC-C	miR831-5p:ATCLC-C	0.931666
AT1G51460.1	miR776	1207	5	0.196945	0.741494	no	ABCG13	miR776:ABCG13	0.931668
AT3G01810.3	miR414	2654	5.5	0.214494	0.882408	no	NA	miR414:AT3G01810.3	0.931668
AT3G20050.1	miR5645a	1735	4.5	0.159896	0.541332	no	ATTCP-1	miR5645a:ATTCP-1	0.931668
AT1G15780.1	miR414	3647	5	0.138446	0.766353	no	NRB4	miR414:NRB4	0.931728
AT2G32765.1	miR5656	131	5.5	0.448488	0.866952	no	ATSUMO5	miR5656:ATSUMO5	0.931728
AT1G10720.1	miR414	1135	5.5	0.212544	1.01303	no	NA	miR414:AT1G10720.1	0.939489
AT3G63095.1	miR414	283	5.5	0.196945	1.00987	no	NA	miR414:AT3G63095.1	0.941508
AT4G21450.3	miR5021	327	4	0.212544	0.681213	no	NA	miR5021:AT4G21450.3	0.94289
AT1G48380.2	miR396a-5p	1173	6	0.284693	0.937397	no	HYP7	miR396a-5p:HYP7	0.947768
AT2G44820.2	miR5012	448	5	0.181345	0.725694	no	NA	miR5012:AT2G44820.2	0.948137
AT4G21660.2	miR847	1356	6	0.345141	0.951713	no	NA	miR847:AT4G21660.2	0.94945
AT5G44180.2	miR414	4384	5.5	0.251543	0.872253	no	RLT2	miR414:RLT2	0.94945
AT1G61890.1	miR5021	557	4	0.214494	0.663412	no	NA	miR5021:AT1G61890.1	0.949587
AT2G17350.1	miR865-3p	261	6	0.329541	0.953835	no	NA	miR865-3p:AT2G17350.1	0.949587
AT3G07850.1	miR5632-3p	1445	4.5	0.0857977	0.138867	no	NA	miR5632-3p:AT3G07850.1	0.949587
AT3G55730.1	miR8168	849	5.5	0.335391	0.840458	no	AtMYB109	miR8168:AtMYB109	0.949587
AT4G02450.2	miR414	735	4.5	0.460188	0.283452	no	NA	miR414:AT4G02450.2	0.949587
AT4G20340.1	miR394a	339	6	0.138446	0.940403	no	NA	miR394a:AT4G20340.1	0.949587
AT4G34180.1	miR5021	828	4	0.36464	0.669805	no	NA	miR5021:AT4G34180.1	0.949587
AT3G16640.1	miR414	276	4.5	1.00422	0.22472	no	TCTP	miR414:TCTP	0.954389
AT1G64065.1	miR5021	239	5	0.177445	1.00667	no	NA	miR5021:AT1G64065.1	0.959232
AT1G01440.1	miR837-5p	1626	5.5	0.185245	0.857512	no	NA	miR837-5p:AT1G01440.1	0.960022
AT1G55330.1	miR414	96	4.5	0.795579	0.113531	no	AGP21	miR414:AGP21	0.960613
AT1G03475.1	miR5021	262	5	0.177445	1.00499	no	ATCPO-I	miR5021:ATCPO-I	0.961573
AT4G25450.3	miR1886.1	1836	5.5	0.661033	0.879236	no	ABCB28	miR1886.1:ABCB28	0.96533
AT5G42620.2	miR868-3p	2540	6	0.150146	0.935007	no	NA	miR868-3p:AT5G42620.2	0.966403
AT2G13680.1	miR4227	5237	5.5	0.122847	0.991391	no	ATGSL02	miR4227:ATGSL02	0.969236
AT1G08560.1	miR5650	755	5	0.403639	0.71353	no	ATSYP111	miR5650:ATSYP111	0.969572
AT1G19520.2	miR4227	683	6	0.257393	0.942969	no	NFD5	miR4227:NFD5	0.969572
AT1G52980.1	miR865-3p	567	5.5	0.144296	0.854404	no	AtNug2	miR865-3p:AtNug2	0.969572
AT1G66180.1	miR156j	645	5	0.191095	0.788342	no	NA	miR156j:AT1G66180.1	0.969572
AT1G68300.1	miR2939	621	6	0.339291	0.915981	no	NA	miR2939:AT1G68300.1	0.969572
AT1G73680.2	miR158a-5p	1319	5.5	0.167696	0.853242	no	ALPHA DOX2	miR158a-5p:ALPHA DOX2	0.969572
AT2G38730.1	miR394b-3p	191	5	0.232044	0.711658	no	NA	miR394b-3p:AT2G38730.1	0.969572
AT3G13040.2	miR393a-3p	1458	5.5	0.618134	0.8583	no	NA	miR393a-3p:AT3G13040.2	0.969572
AT3G17880.2	miR414	315	5.5	0.216444	0.848945	no	ATHIP2	miR414:ATHIP2	0.969572
AT3G48860.2	miR2934-3p	1729	5.5	0.142346	0.849239	no	NA	miR2934-3p:AT3G48860.2	0.969572
AT3G56260.2	miR831-3p	768	5	0.194995	0.650682	no	NA	miR831-3p:AT3G56260.2	0.969572
AT4G13615.1	miR774b-5p	14	5.5	1.22652	0.863173	no	NA	miR774b-5p:AT4G13615.1	0.969572
AT4G37590.1	miR827	1977	5.5	0.278843	0.863128	no	MEL1	miR827:MEL1	0.969572
AT5G54430.1	miR8167a	126	5	0.226194	0.664144	no	ATPHOS32	miR8167a:ATPHOS32	0.969572
AT1G53580.2	miR5632-5p	815	6	0.686382	1.09774	no	ETHE1	miR5632-5p:ETHE1	0.971263
AT2G03120.1	miR5634	546	6	0.549886	1.09657	no	ATSPP	miR5634:ATSPP	0.971921
AT2G31370.6	miR860	586	5	0.245694	0.903797	no	NA	miR860:AT2G31370.6	0.971921
AT2G33700.1	miR2112-3p	958	6	0.0701982	1.0702	no	PP2CG1	miR2112-3p:PP2CG1	0.971921
AT2G40660.1	miR169f-3p	762	5.5	0.278843	0.9791	no	NA	miR169f-3p:AT2G40660.1	0.971921
AT3G11120.1	miR831-3p	105	5	1.74325	0.797146	no	NA	miR831-3p:AT3G11120.1	0.971921
AT4G26230.1	miR414	332	5	1.47806	0.869937	no	NA	miR414:AT4G26230.1	0.971921
AT5G51910.2	miR849	774	5.5	0.214494	0.995206	no	NA	miR849:AT5G51910.2	0.971921
AT1G58290.1	miR5021	228	5	0.173545	0.8431	no	AtHEMA1	miR5021:AtHEMA1	0.973104
AT2G32700.7	miR408-3p	970	6	0.116997	0.918248	no	LUH	miR408-3p:LUH	0.973104
AT4G20170.1	miR5021	61	4	0.169646	0.599934	no	GALS3	miR5021:GALS3	0.973104
AT2G20360.1	miR5021	149	5	0.413389	0.840062	no	NA	miR5021:AT2G20360.1	0.973557
AT3G55800.1	miR854a	344	4.5	0.193045	0.472519	no	SBPASE	miR854a:SBPASE	0.973557
AT1G62914.1	miR5654-5p	1550	6	0.0623984	0.936408	no	NA	miR5654-5p:AT1G62914.1	0.973987
AT1G71860.3	miR773a	1162	5	0.187195	0.674359	no	ATPTP1	miR773a:ATPTP1	0.973987
AT2G26640.1	miR8167a	1575	5.5	0.241794	0.816628	no	KCS11	miR8167a:KCS11	0.973987
AT3G61980.1	miR3434-5p	563	6	0.321742	0.937746	no	NA	miR3434-5p:AT3G61980.1	0.973987
AT4G39170.2	miR5020a	1750	5	0.179395	0.707546	no	NA	miR5020a:AT4G39170.2	0.973987
AT5G06290.1	miR5021	192	6	0.37829	0.921756	no	2-Cys Prx B	miR5021:2-Cys Prx B	0.973987
AT5G22210.2	miR831-3p	115	5	0.130647	0.62426	no	NA	miR831-3p:AT5G22210.2	0.973987
AT1G01610.1	miR774b-5p	330	5.5	0.343191	0.80393	no	ATGPAT4	miR774b-5p:ATGPAT4	0.974778
AT1G02900.1	miR1888a	397	6	0.169646	0.925907	no	ATRALF1	miR1888a:ATRALF1	0.974778
AT1G06190.2	miR414	913	5.5	0.171595	0.794928	no	RHON1	miR414:RHON1	0.974778
AT1G14410.1	miR156i	151	5.5	0.191095	0.824522	no	ATWHY1	miR156i:ATWHY1	0.974778
AT1G22920.2	miR5662	870	5.5	0.547936	0.791591	no	AJH1	miR5662:AJH1	0.974778
AT1G30630.1	miR780.2	524	5	0.269093	0.584844	no	NA	miR780.2:AT1G30630.1	0.974778
AT1G33240.1	miR5658	1516	5	0.155996	0.675337	no	AT-GTL1	miR5658:AT-GTL1	0.974778
AT1G48920.1	miR414	1280	5.5	1.13682	0.824658	no	ATNUC-L1	miR414:ATNUC-L1	0.974778
AT1G49760.2	miR8183	2090	5	0.407539	0.61389	no	PAB8	miR8183:PAB8	0.974778
AT1G54710.1	miR414	3033	6	0.343191	0.904179	no	ATATG18H	miR414:ATATG18H	0.974778
AT1G58030.1	miR782	1725	5	0.286642	0.652762	no	CAT2	miR782:CAT2	0.974778
AT1G62750.1	miR842	2095	5	0.220344	0.656125	no	ATSCO1	miR842:ATSCO1	0.974778
AT1G63130.1	miR5654-5p	1684	6	0.126747	0.918898	no	TAS8	miR5654-5p:TAS8	0.974778
AT1G68010.2	miR5646	1243	5.5	1.66916	0.783609	no	ATHPR1	miR5646:ATHPR1	0.974778
AT1G68260.1	miR5644	567	6	0.491387	0.862432	no	NA	miR5644:AT1G68260.1	0.974778
AT1G72230.1	miR408-3p	823	6	0.183295	0.888699	no	NA	miR408-3p:AT1G72230.1	0.974778
AT1G75780.1	miR414	1350	5	0.113097	0.634377	no	TUB1	miR414:TUB1	0.974778
AT1G75860.1	miR5013	737	6	0.202795	0.882662	no	NA	miR5013:AT1G75860.1	0.974778
AT1G78040.2	miR415	511	4.5	2.89762	0.387834	no	NA	miR415:AT1G78040.2	0.974778
AT2G03150.1	miR847	3661	5.5	0.196945	0.818627	no	emb1579	miR847:emb1579	0.974778
AT2G15430.1	miR1886.1	314	5.5	0.159896	0.845134	no	NRPB3	miR1886.1:NRPB3	0.974778
AT2G19080.1	miR414	1002	5	0.194995	0.62101	no	NA	miR414:AT2G19080.1	0.974778
AT2G28620.1	miR413	3076	6	0.226194	0.884642	no	NA	miR413:AT2G28620.1	0.974778
AT2G29960.2	miR5632-5p	378	5	0.641533	0.612316	no	ATCYP5	miR5632-5p:ATCYP5	0.974778
AT2G31960.2	miR860	5964	5	0.214494	0.650932	no	ATGSL03	miR860:ATGSL03	0.974778
AT2G36850.1	miR838	5971	5	0.272993	0.597377	no	ATGSL08	miR838:ATGSL08	0.974778
AT2G40000.1	miR5027	1085	5	0.354891	0.630044	no	ATHSPRO2	miR5027:ATHSPRO2	0.974778
AT2G44520.1	miR854a	1190	5	0.159896	0.726441	no	COX10	miR854a:COX10	0.974778
AT3G13227.1	miR414	61	5	0.183295	0.68815	no	NA	miR414:AT3G13227.1	0.974778
AT3G14200.1	miR4221	879	5.5	0.200845	0.76422	no	NA	miR4221:AT3G14200.1	0.974778
AT3G17170.1	miR414	768	5	0.198895	0.608245	no	RFC3	miR414:RFC3	0.974778
AT3G19390.1	miR5657	1134	5.5	0.462138	0.791938	no	NA	miR5657:AT3G19390.1	0.974778
AT3G20800.1	miR832-5p	179	6	0.165746	0.876803	no	NA	miR832-5p:AT3G20800.1	0.974778
AT3G21180.1	miR169h	3123	5	0.271043	0.663219	no	ACA9	miR169h:ACA9	0.974778
AT3G22440.1	miR868-3p	1218	5	0.161846	0.626644	no	NA	miR868-3p:AT3G22440.1	0.974778
AT3G23810.1	miR5021	1697	4	0.540136	0.48372	no	ATSAHH2	miR5021:ATSAHH2	0.974778
AT3G28770.1	miR3440b-5p	1009	5	0.191095	0.659766	no	NA	miR3440b-5p:AT3G28770.1	0.974778
AT3G29075.1	miR414	489	5.5	0.540136	0.806913	no	NA	miR414:AT3G29075.1	0.974778
AT3G46740.1	miR414	405	5.5	0.167696	0.798622	no	2018-03-01	miR414:MAR1	0.974778
AT3G49470.1	miR414	244	5	0.198895	0.643244	no	NACA2	miR414:NACA2	0.974778
AT3G49720.2	miR837-5p	513	5	0.202795	0.538797	no	NA	miR837-5p:AT3G49720.2	0.974778
AT3G50690.1	miR414	1096	5.5	0.323691	0.785838	no	NA	miR414:AT3G50690.1	0.974778
AT3G58660.1	miR414	1016	5.5	0.194995	0.788887	no	NA	miR414:AT3G58660.1	0.974778
AT3G59660.1	miR5021	2042	5.5	0.163796	0.831438	no	NA	miR5021:AT3G59660.1	0.974778
AT3G59910.1	miR5630a	1676	6	0.257393	0.853142	no	NA	miR5630a:AT3G59910.1	0.974778
AT3G63440.1	miR156a-3p	1272	5.5	0.111147	0.789425	no	ATCKX6	miR156a-3p:ATCKX6	0.974778
AT4G01690.2	miR170-3p	1412	5	0.122847	0.651518	no	HEMG1	miR170-3p:HEMG1	0.974778
AT4G09350.1	miR5628	697	6	0.341241	0.919768	no	CRRJ	miR5628:CRRJ	0.974778
AT4G12420.2	miR414	2007	5	0.113097	0.600351	no	SKU5	miR414:SKU5	0.974778
AT4G14750.1	miR5658	1081	5	0.222294	0.695837	no	IQD19	miR5658:IQD19	0.974778
AT4G16830.3	miR842	739	6	0.267143	0.874804	no	NA	miR842:AT4G16830.3	0.974778
AT4G27580.1	miR774b-5p	677	5.5	0.313942	0.816933	no	NA	miR774b-5p:AT4G27580.1	0.974778
AT4G29020.2	miR172b-5p	319	5.5	1.06662	0.822958	no	NA	miR172b-5p:AT4G29020.2	0.974778
AT4G30440.1	miR161.1	695	5.5	0.432889	0.783544	no	GAE1	miR161.1:GAE1	0.974778
AT4G30520.1	miR5021	126	5	0.179395	0.808781	no	SARK	miR5021:SARK	0.974778
AT4G30890.3	miR5026	2104	5.5	0.155996	0.783308	no	UBP24	miR5026:UBP24	0.974778
AT4G31820.1	miR1886.1	236	5.5	0.177445	0.828493	no	ENP	miR1886.1:ENP	0.974778
AT4G35800.1	miR774b-5p	5544	5	0.185245	0.711055	no	NRPB1	miR774b-5p:NRPB1	0.974778
AT4G36520.1	miR773a	2367	5	0.239844	0.583423	no	NA	miR773a:AT4G36520.1	0.974778
AT4G37980.2	miR5012	810	5	0.171595	0.602138	no	ATCAD7	miR5012:ATCAD7	0.974778
AT4G38620.1	miR858a	615	5.5	0.214494	0.794599	no	ATMYB4	miR858a:ATMYB4	0.974778
AT4G38760.1	miR393b-3p	5661	5	0.198895	0.68176	no	NA	miR393b-3p:AT4G38760.1	0.974778
AT5G02320.2	miR838	378	6	0.146246	0.884182	no	ATMYB3R5	miR838:ATMYB3R5	0.974778
AT5G05580.2	miR5021	376	6	0.177445	0.909616	no	AtFAD8	miR5021:AtFAD8	0.974778
AT5G08300.1	miR171b-3p	1090	5	0.269093	0.648995	no	NA	miR171b-3p:AT5G08300.1	0.974778
AT5G14210.1	miR5652	1858	5.5	0.286642	0.781947	no	NA	miR5652:AT5G14210.1	0.974778
AT5G14910.1	miR5647	548	5	0.545986	0.633845	no	NA	miR5647:AT5G14910.1	0.974778
AT5G15160.1	miR1886.2	163	5	0.198895	0.721777	no	BHLH134	miR1886.2:BHLH134	0.974778
AT5G17410.2	miR4245	1093	6	0.132597	0.902149	no	NA	miR4245:AT5G17410.2	0.974778
AT5G19350.2	miR156a-5p	560	5	0.167696	0.693228	no	NA	miR156a-5p:AT5G19350.2	0.974778
AT5G26710.1	miR414	2123	5	0.179395	0.677431	no	NA	miR414:AT5G26710.1	0.974778
AT5G50920.1	miR173-3p	1539	5	0.230094	0.59691	no	ATHSP93-V	miR173-3p:ATHSP93-V	0.974778
AT5G61130.1	miR5021	121	4	0.136496	0.509098	no	PDCB1	miR5021:PDCB1	0.974778
AT5G64030.1	miR168a-5p	276	5.5	0.194995	0.742079	no	NA	miR168a-5p:AT5G64030.1	0.974778
AT5G65020.2	miR837-5p	54	5.5	0.175495	0.784088	no	ANNAT2	miR837-5p:ANNAT2	0.974778
AT5G65400.1	miR831-5p	217	5.5	0.115047	0.797721	no	NA	miR831-5p:AT5G65400.1	0.974778
AT5G65670.2	miR390a-3p	939	5.5	0.331491	0.767372	no	IAA9	miR390a-3p:IAA9	0.974778
AT5G66240.3	miR777	252	6	0.226194	0.897265	no	NA	miR777:AT5G66240.3	0.974778
AT5G66800.1	miR5021	161	5	0.187195	0.788814	no	NA	miR5021:AT5G66800.1	0.974778
AT1G04910.1	miR865-5p	1622	5.5	0.278843	0.786528	no	NA	miR865-5p:AT1G04910.1	0.974995
AT1G20330.1	miR831-3p	739	5	0.181345	0.427598	no	CVP1	miR831-3p:CVP1	0.974995
AT2G01970.1	miR156i	1804	5	0.198895	0.701999	no	NA	miR156i:AT2G01970.1	0.974995
AT2G15292.1	miR158a-5p	578	6	0.483587	0.875695	no	NA	miR158a-5p:AT2G15292.1	0.974995
AT3G02360.2	miR859	1605	5	0.76633	0.567625	no	NA	miR859:AT3G02360.2	0.974995
AT3G13850.1	miR5021	820	5.5	0.185245	0.816066	no	LBD22	miR5021:LBD22	0.974995
AT3G16480.1	miR173-3p	1295	5.5	0.206695	0.755751	no	MPPalpha	miR173-3p:MPPalpha	0.974995
AT3G22750.1	miR415	1916	5	0.196945	0.72145	no	NA	miR415:AT3G22750.1	0.974995
AT3G22910.1	miR830-5p	2796	5	0.228144	0.507999	no	NA	miR830-5p:AT3G22910.1	0.974995
AT3G26640.1	miR5662	1029	5.5	0.105297	0.754939	no	LWD2	miR5662:LWD2	0.974995
AT3G53510.1	miR5021	2038	5	0.179395	0.766744	no	ABCG20	miR5021:ABCG20	0.974995
AT4G17950.1	miR166a-5p	1528	5.5	0.163796	0.695746	no	NA	miR166a-5p:AT4G17950.1	0.974995
AT4G20320.2	miR172d-5p	924	5.5	0.191095	0.758015	no	NA	miR172d-5p:AT4G20320.2	0.974995
AT4G37610.1	miR167c-5p	1109	5	0.130647	0.559776	no	BT5	miR167c-5p:BT5	0.974995
AT5G04140.2	miR157c-3p	5013	5	0.547936	0.520603	no	FD-GOGAT	miR157c-3p:FD-GOGAT	0.974995
AT5G24655.1	miR396b-5p	161	5.5	0.360741	0.767835	no	LSU4	miR396b-5p:LSU4	0.974995
AT5G55660.1	miR414	693	5	0.194995	0.573904	no	NA	miR414:AT5G55660.1	0.974995
AT5G58710.1	miR8172	706	5	0.132597	0.528111	no	ROC7	miR8172:ROC7	0.974995
AT1G45688.2	miR1886.1	740	6	0.282743	0.874973	no	NA	miR1886.1:AT1G45688.2	0.977609
AT4G16420.3	miR157a-3p	1450	6	0.337341	0.860699	no	ADA2B	miR157a-3p:ADA2B	0.977609
AT4G20670.1	miR5638a	756	5.5	0.36269	0.776625	no	NA	miR5638a:AT4G20670.1	0.977609
AT5G09900.3	miR172a	649	5.5	0.271043	0.745947	no	EMB2107	miR172a:EMB2107	0.977609
AT1G07320.4	miR865-3p	595	5	0.304192	0.506756	no	EMB2784	miR865-3p:EMB2784	0.981605
AT1G50170.1	miR8181	607	6	0.214494	0.844138	no	ATSIRB	miR8181:ATSIRB	0.981605
AT1G53580.2	miR5021	211	6	0.202795	0.865326	no	ETHE1	miR5021:ETHE1	0.981605
AT1G74560.3	miR414	863	5	0.438738	0.530117	no	NRP1	miR414:NRP1	0.981605
AT1G75930.1	miR5021	178	4	0.415339	0.083952	no	EXL6	miR5021:EXL6	0.981605
AT1G77260.1	miR159b-5p	1929	6	0.405589	0.831571	no	NA	miR159b-5p:AT1G77260.1	0.981605
AT3G02468.1	miR854a	813	5	0.713681	0.618535	no	CPuORF9	miR854a:CPuORF9	0.981605
AT3G02470.4	miR854a	866	5	0.713681	0.618535	no	SAMDC	miR854a:SAMDC	0.981605
AT3G22790.1	miR776	2725	6	0.142346	0.86555	no	NET1A	miR776:NET1A	0.981605
AT4G23820.1	miR870-5p	1356	5	0.458238	0.697064	no	NA	miR870-5p:AT4G23820.1	0.981605
AT4G24960.3	miR414	695	5.5	0.409489	0.753082	no	ATHVA22D	miR414:ATHVA22D	0.981605
AT4G28300.2	miR156a-3p	1915	6	0.547936	0.859282	no	NA	miR156a-3p:AT4G28300.2	0.981605
AT5G37780.3	miR838	530	5	0.629833	0.494625	no	ACAM-1	miR838:ACAM-1	0.981605
AT5G50830.2	miR414	783	5.5	0.189145	0.757714	no	NA	miR414:AT5G50830.2	0.981605
AT5G60160.1	miR393a-3p	1282	5	0.249593	0.509474	no	NA	miR393a-3p:AT5G60160.1	0.981605
AT5G60800.2	miR167a-3p	790	6	0.417289	0.84927	no	NA	miR167a-3p:AT5G60800.2	0.981605
AT2G01490.1	miR5655	1039	6	0.128697	0.860293	no	PAHX	miR5655:PAHX	0.983485
AT3G51240.2	miR408-3p	430	5	0.469938	0.399312	no	F3'H	miR408-3p:F3'H	0.983485
AT4G22220.1	miR172b-5p	545	5	0.662983	0.60664	no	ATISU1	miR172b-5p:ATISU1	0.983485
AT4G23470.3	miR4245	1039	6	0.115047	0.860116	no	NA	miR4245:AT4G23470.3	0.983485
AT5G06700.1	miR3440b-5p	1555	6	0.512837	0.853659	no	TBR	miR3440b-5p:TBR	0.983485
AT1G33811.1	miR158a-5p	958	5.5	0.159896	0.94443	no	NA	miR158a-5p:AT1G33811.1	0.986719
AT1G79050.2	miR868-3p	1065	5.5	0.233994	0.933612	no	RECA1	miR868-3p:RECA1	0.986719
AT2G19860.2	miR5016	1393	5.5	0.224244	0.927604	no	ATHXK2	miR5016:ATHXK2	0.986719
AT3G04290.1	miR5661	669	5.5	2.44524	0.943907	no	ATLTL1	miR5661:ATLTL1	0.986719
AT3G20530.1	miR5027	975	6	0.247643	1.03227	no	NA	miR5027:AT3G20530.1	0.986719
AT4G00230.1	miR829-5p	2134	5.5	0.185245	0.952965	no	XSP1	miR829-5p:XSP1	0.986719
AT3G56800.1	miR837-5p	536	5	0.584985	0.344445	no	ACAM-3	miR837-5p:ACAM-3	0.988511
AT1G49300.2	miR165a-5p	464	5.5	0.144296	0.901664	no	ATRAB7	miR165a-5p:ATRAB7	0.989567
AT1G80380.4	miR5661	829	5.5	0.341241	0.754341	no	NA	miR5661:AT1G80380.4	0.989948
AT4G17090.1	miR5645a	1469	5	0.417289	0.530987	no	AtBAM3	miR5645a:AtBAM3	0.992417
AT3G12280.2	miR2112-5p	2420	6	0.249593	1.01424	no	ATRBR1	miR2112-5p:ATRBR1	0.992436
AT2G35520.2	miR1886.1	270	5	0.272993	0.596831	no	DAD2	miR1886.1:DAD2	0.992827
AT1G12520.3	miR398a-3p	820	6	0.245694	0.822356	no	ATCCS	miR398a-3p:ATCCS	0.993764
AT1G19440.1	miR829-5p	1446	6	0.146246	0.860874	no	KCS4	miR829-5p:KCS4	0.993764
AT1G19570.2	miR842	467	5	0.934025	0.329531	no	ATDHAR1	miR842:ATDHAR1	0.993764
AT1G25450.1	miR5658	1374	5.5	0.265193	0.733283	no	CER60	miR5658:CER60	0.993764
AT1G27400.1	miR773a	591	5	0.171595	0.354091	no	NA	miR773a:AT1G27400.1	0.993764
AT1G62500.1	miR161.2	778	5	0.200845	0.522852	no	NA	miR161.2:AT1G62500.1	0.993764
AT1G63710.1	miR1886.3	365	5.5	0.150146	0.75346	no	CYP86A7	miR1886.3:CYP86A7	0.993764
AT1G68530.2	miR824-3p	485	5.5	0.124797	0.687662	no	CER6	miR824-3p:CER6	0.993764
AT1G68560.1	miR5650	2677	5	0.185245	0.304704	no	ATXYL1	miR5650:ATXYL1	0.993764
AT1G78200.2	miR5661	696	5.5	0.208645	0.738044	no	NA	miR5661:AT1G78200.2	0.993764
AT2G04570.1	miR834	401	5	0.239844	0.321806	no	NA	miR834:AT2G04570.1	0.993764
AT2G33560.2	miR5658	1161	5.5	0.152096	0.735936	no	BUBR1	miR5658:BUBR1	0.993764
AT2G38110.1	miR8178	876	5	0.202795	0.546919	no	ATGPAT6	miR8178:ATGPAT6	0.993764
AT3G02750.3	miR447a.2-3p	1614	6	0.216444	0.84207	no	NA	miR447a.2-3p:AT3G02750.3	0.993764
AT3G13870.2	miR156a-5p	1481	5.5	0.132597	0.734458	no	GOM8	miR156a-5p:GOM8	0.993764
AT3G18490.1	miR847	1195	5	0.161846	0.265306	no	ASPG1	miR847:ASPG1	0.993764
AT3G28980.1	miR773a	1123	5	0.444588	0.272582	no	NA	miR773a:AT3G28980.1	0.993764
AT4G02380.2	miR847	350	5	0.261293	0.271456	no	AtLEA5	miR847:AtLEA5	0.993764
AT4G04210.1	miR399c-5p	542	5.5	0.308092	0.698179	no	PUX4	miR399c-5p:PUX4	0.993764
AT4G10480.2	miR414	216	5	0.36269	0.390229	no	NA	miR414:AT4G10480.2	0.993764
AT4G15790.1	miR854a	256	6	0.37244	0.849185	no	NA	miR854a:AT4G15790.1	0.993764
AT4G34990.1	miR858b	377	6	0.179395	0.817527	no	AtMYB32	miR858b:AtMYB32	0.993764
AT4G38920.1	miR156a-5p	404	5	0.612284	0.602282	no	ATVHA-C3	miR156a-5p:ATVHA-C3	0.993764
AT5G03520.2	miR8182	770	5.5	0.493337	0.691914	no	ATRAB-E1D	miR8182:ATRAB-E1D	0.993764
AT5G09225.1	miR415	463	6	0.194995	0.833976	no	NA	miR415:AT5G09225.1	0.993764
AT5G10400.1	miR414	488	5	0.132597	0.431579	no	NA	miR414:AT5G10400.1	0.993764
AT5G23860.2	miR8167a	872	5.5	0.218394	0.700617	no	TUB8	miR8167a:TUB8	0.993764
AT5G27850.1	miR396b-5p	541	5	0.401689	0.227996	no	NA	miR396b-5p:AT5G27850.1	0.993764
AT5G39570.1	miR842	438	5.5	0.261293	0.689711	no	NA	miR842:AT5G39570.1	0.993764
AT5G45670.1	miR167a-3p	1107	5	1.32792	0.355115	no	NA	miR167a-3p:AT5G45670.1	0.993764
AT5G58250.1	miR4245	718	5	0.126747	0.525861	no	EMB3143	miR4245:EMB3143	0.993764
AT5G60410.5	miR5661	2827	5.5	0.191095	0.727327	no	ATSIZ1	miR5661:ATSIZ1	0.993764
AT5G60960.1	miR854a	70	6	0.116997	0.847596	no	PNM1	miR854a:PNM1	0.993764
AT5G66720.2	miR3932b-5p	1240	5.5	0.126747	0.680739	no	NA	miR3932b-5p:AT5G66720.2	0.993764
AT5G10750.1	miR852	696	5.5	0.130647	0.709856	no	NA	miR852:AT5G10750.1	0.994207
AT3G54470.1	miR393a-3p	1504	6	0.779979	0.83759	no	NA	miR393a-3p:AT3G54470.1	0.994821
AT1G12460.1	miR157a-3p	2961	5.5	0.159896	0.848752	no	NA	miR157a-3p:AT1G12460.1	0.997039
AT1G15000.1	miR5661	869	5.5	0.142346	0.891905	no	scpl50	miR5661:scpl50	0.997039
AT1G57750.2	miR414	1303	5	0.885277	0.674301	no	CYP96A15	miR414:CYP96A15	0.997039
AT1G67850.2	miR857	1103	6	0.196945	0.99192	no	NA	miR857:AT1G67850.2	0.997039
AT2G03470.2	miR5013	978	6	0.204745	0.996773	no	NA	miR5013:AT2G03470.2	0.997039
AT2G24830.1	miR847	810	6	0.294442	0.986623	no	NA	miR847:AT2G24830.1	0.997039
AT2G27470.1	miR414	850	5.5	0.126747	0.905932	no	NF-YB11	miR414:NF-YB11	0.997039
AT2G38040.2	miR396a-5p	1994	5.5	0.485537	0.852322	no	CAC3	miR396a-5p:CAC3	0.997039
AT4G31560.1	miR173-3p	150	6	0.191095	0.98548	no	HCF153	miR173-3p:HCF153	0.997039
AT5G07430.1	miR5648-5p	563	5.5	0.428989	0.901579	no	NA	miR5648-5p:AT5G07430.1	0.997039
AT1G01550.2	miR5665	146	6	0.276893	0.810605	no	BPS1	miR5665:BPS1	0.998074
AT2G30110.1	miR414	3313	5	0.280793	0.316267	no	ATUBA1	miR414:ATUBA1	0.998074
AT5G09550.1	miR824-3p	520	5.5	0.115047	0.671297	no	GDI	miR824-3p:GDI	0.998074
AT3G46030.1	miR4243	261	5.5	1.14072	0.902949	no	HTB11	miR4243:HTB11	0.999033
AT1G04630.1	miR414	591	5.5	0.159896	0.701593	no	MEE4	miR414:MEE4	0.999524
AT2G23800.1	miR2937	1123	5	0.222294	0.315335	no	GGPS2	miR2937:GGPS2	0.999524
AT5G07530.2	miR164b-3p	1497	5	0.852128	0.0771858	no	ATGRP-7	miR164b-3p:ATGRP-7	0.999524
AT1G01300.1	miR5021	169	6	0.177445	0.755894	no	NA	miR5021:AT1G01300.1	0.999938
AT1G01630.1	miR8171	978	6	0.306142	0.664627	no	NA	miR8171:AT1G01630.1	0.999938
AT1G02205.3	miR774b-3p	1614	6	0.175495	0.236513	no	CER1	miR774b-3p:CER1	0.999938
AT1G02500.2	miR858a	967	5.5	0.37244	0.597058	no	AtSAM1	miR858a:AtSAM1	0.999938
AT1G02560.1	miR5998a	928	6	0.237894	0.45093	no	CLPP5	miR5998a:CLPP5	0.999938
AT1G04410.1	miR171c-5p	666	6	1.41956	0.720227	no	c-NAD-MDH1	miR171c-5p:c-NAD-MDH1	0.999938
AT1G06720.1	miR414	2026	6	0.144296	0.260487	no	NA	miR414:AT1G06720.1	0.999938
AT1G06760.1	miR834	682	6	0.206695	0.364484	no	NA	miR834:AT1G06760.1	0.999938
AT1G07320.4	miR1886.1	100	6	0.282743	0.786099	no	EMB2784	miR1886.1:EMB2784	0.999938
AT1G07920.1	miR861-5p	491	6	0.0565485	0.658497	no	NA	miR861-5p:AT1G07920.1	0.999938
AT1G07930.2	miR861-5p	503	6	0.38219	0.722685	no	NA	miR861-5p:AT1G07930.2	0.999938
AT1G07940.2	miR861-5p	622	6	0.155996	0.539021	no	NA	miR861-5p:AT1G07940.2	0.999938
AT1G09200.1	miR4221	102	6	0.475787	0.569976	no	NA	miR4221:AT1G09200.1	0.999938
AT1G10657.4	miR830-5p	370	6	0.255443	0.737636	no	NA	miR830-5p:AT1G10657.4	0.999938
AT1G10850.1	miR837-5p	2217	6	0.228144	0.720771	no	NA	miR837-5p:AT1G10850.1	0.999938
AT1G10950.1	miR5024-5p	1797	5.5	0.132597	0.537892	no	AtTMN1	miR5024-5p:AtTMN1	0.999938
AT1G11860.3	miR843	518	6	0.189145	0.769182	no	NA	miR843:AT1G11860.3	0.999938
AT1G11910.1	miR172d-5p	1558	6	0.169646	0.298301	no	APA1	miR172d-5p:APA1	0.999938
AT1G12080.2	miR4221	353	5.5	0.315892	0.188195	no	NA	miR4221:AT1G12080.2	0.999938
AT1G12080.2	miR838	461	5.5	1.12122	0.412084	no	NA	miR838:AT1G12080.2	0.999938
AT1G12810.2	miR5640	395	6	0.271043	0.560074	no	NA	miR5640:AT1G12810.2	0.999938
AT1G12910.1	miR2937	970	5.5	0.148196	0.454756	no	ATAN11	miR2937:ATAN11	0.999938
AT1G13140.2	miR5656	1434	5.5	0.235944	0.405307	no	CYP86C3	miR5656:CYP86C3	0.999938
AT1G14320.2	miR447c-3p	453	6	0.815079	0.183133	no	RPL10	miR447c-3p:RPL10	0.999938
AT1G15340.2	miR773a	736	6	0.323691	0.676241	no	MBD10	miR773a:MBD10	0.999938
AT1G15340.2	miR773a	994	5.5	0.77413	0.341166	no	MBD10	miR773a:MBD10	0.999938
AT1G15500.1	miR172e-3p	1904	6	0.202795	0.485378	no	ATNTT2	miR172e-3p:ATNTT2	0.999938
AT1G16890.3	miR5998a	491	5.5	0.489437	0.408722	no	UBC13B	miR5998a:UBC13B	0.999938
AT1G17745.2	miR839-5p	1917	6	0.930126	0.420341	no	PGDH	miR839-5p:PGDH	0.999938
AT1G18740.1	miR865-3p	1282	6	0.157946	0.594527	no	NA	miR865-3p:AT1G18740.1	0.999938
AT1G20693.3	miR414	583	5.5	0.540136	0.55124	no	HMG BETA 1	miR414:HMG BETA 1	0.999938
AT1G21900.1	miR839-5p	569	6	0.173545	0.626366	no	p24delta5	miR839-5p:p24delta5	0.999938
AT1G22200.2	miR172b-5p	985	6	0.196945	0.110465	no	NA	miR172b-5p:AT1G22200.2	0.999938
AT1G22640.1	miR164c-3p	613	6	0.237894	0.58519	no	ATMYB3	miR164c-3p:ATMYB3	0.999938
AT1G24260.3	miR398a-5p	743	6	0.487487	0.413722	no	AGL9	miR398a-5p:AGL9	0.999938
AT1G24260.3	miR5658	794	6	0.187195	0.275761	no	AGL9	miR5658:AGL9	0.999938
AT1G26480.1	miR414	192	6	0.298342	0.710728	no	GF14 IOTA	miR414:GF14 IOTA	0.999938
AT1G27530.1	miR5645a	398	5	0.144296	0.378643	no	NA	miR5645a:AT1G27530.1	0.999938
AT1G27710.2	miR170-3p	661	6	0.288592	0.542186	no	NA	miR170-3p:AT1G27710.2	0.999938
AT1G27970.2	miR5020a	276	6	0.448488	0.482725	no	NTF2B	miR5020a:NTF2B	0.999938
AT1G29220.2	miR773a	1196	6	0.157946	0.810325	no	NA	miR773a:AT1G29220.2	0.999938
AT1G30230.2	miR5665	662	6	0.76243	0.282816	no	eEF-1Bb1	miR5665:eEF-1Bb1	0.999938
AT1G30230.2	miR5021	834	5	0.191095	0.402173	no	eEF-1Bb1	miR5021:eEF-1Bb1	0.999938
AT1G31130.1	miR776	1216	5.5	0.228144	0.587075	no	NA	miR776:AT1G31130.1	0.999938
AT1G31300.2	miR5663-5p	1133	5.5	0.175495	0.677468	no	NA	miR5663-5p:AT1G31300.2	0.999938
AT1G32230.3	miR5026	768	6	0.187195	0.754596	no	ATP8	miR5026:ATP8	0.999938
AT1G34000.1	miR5021	658	6	0.175495	0.701921	no	OHP2	miR5021:OHP2	0.999938
AT1G34060.1	miR4239	1301	5.5	0.257393	0.544239	no	NA	miR4239:AT1G34060.1	0.999938
AT1G36380.1	miR5021	141	5	0.179395	0.576124	no	NA	miR5021:AT1G36380.1	0.999938
AT1G51950.1	miR414	518	6	0.193045	0.740868	no	IAA18	miR414:IAA18	0.999938
AT1G52300.1	miR778	330	6	0.875527	0.317979	no	NA	miR778:AT1G52300.1	0.999938
AT1G52600.1	miR868-5p	592	5.5	0.274943	0.657891	no	NA	miR868-5p:AT1G52600.1	0.999938
AT1G53210.1	miR852	1134	6	0.189145	0.666606	no	NA	miR852:AT1G53210.1	0.999938
AT1G55535.2	miR5015	1142	6	0.216444	0.77898	no	NA	miR5015:AT1G55535.2	0.999938
AT1G60950.1	miR773b-3p	423	5.5	2.89762	0.259056	no	ATFD2	miR773b-3p:ATFD2	0.999938
AT1G61900.3	miR854a	1474	6	0.202795	0.471285	no	NA	miR854a:AT1G61900.3	0.999938
AT1G62480.1	miR838	473	5.5	0.707831	0.0852407	no	NA	miR838:AT1G62480.1	0.999938
AT1G63830.3	miR5014b	974	6	0.120897	0.671666	no	NA	miR5014b:AT1G63830.3	0.999938
AT1G64520.1	miR156i	907	6	0.189145	0.636016	no	RPN12a	miR156i:RPN12a	0.999938
AT1G64770.3	miR2111a-5p	848	6	0.430939	0.751237	no	NDF2	miR2111a-5p:NDF2	0.999938
AT1G65060.2	miR859	1368	5.5	0.208645	0.482424	no	4CL3	miR859:4CL3	0.999938
AT1G65295.1	miR854a	115	5	1.02957	0.42625	no	NA	miR854a:AT1G65295.1	0.999938
AT1G65560.1	miR396a-3p	1026	6	0.179395	0.746861	no	NA	miR396a-3p:AT1G65560.1	0.999938
AT1G66070.2	miR774b-3p	271	6	0.272993	0.792434	no	NA	miR774b-3p:AT1G66070.2	0.999938
AT1G66340.1	miR2934-3p	2058	6	0.146246	0.770592	no	AtETR1	miR2934-3p:AtETR1	0.999938
AT1G67290.1	miR8180	1073	6	0.214494	0.693707	no	GLOX1	miR8180:GLOX1	0.999938
AT1G68590.2	miR869.1	351	6	0.501137	0.437446	no	PSRP3/1	miR869.1:PSRP3/1	0.999938
AT1G70490.3	miR866-5p	435	6	0.38804	0.468055	no	ARFA1D	miR866-5p:ARFA1D	0.999938
AT1G71695.1	miR169d	523	6	0.230094	0.576718	no	NA	miR169d:AT1G71695.1	0.999938
AT1G72020.1	miR5651	278	6	0.423139	0.20433	no	NA	miR5651:AT1G72020.1	0.999938
AT1G73230.1	miR157a-3p	238	5.5	0.155996	0.371722	no	NA	miR157a-3p:AT1G73230.1	0.999938
AT1G74060.1	miR835-3p	810	5.5	0.194995	0.395674	no	NA	miR835-3p:AT1G74060.1	0.999938
AT1G74800.1	miR5637	1961	5.5	0.220344	0.67306	no	NA	miR5637:AT1G74800.1	0.999938
AT1G74840.2	miR863-5p	280	6	0.187195	0.709734	no	NA	miR863-5p:AT1G74840.2	0.999938
AT1G75180.3	miR414	1321	5.5	0.37049	0.6449	no	NA	miR414:AT1G75180.3	0.999938
AT1G75380.3	miR414	477	6	0.403639	0.760253	no	ATBBD1	miR414:ATBBD1	0.999938
AT1G75500.2	miR868-3p	1230	6	0.249593	0.64611	no	UMAMIT5	miR868-3p:UMAMIT5	0.999938
AT1G76030.1	miR859	1241	6	0.39389	0.765483	no	AtVAB1	miR859:AtVAB1	0.999938
AT1G78080.1	miR5021	653	6	0.181345	0.805808	no	RAP2.4	miR5021:RAP2.4	0.999938
AT1G78830.1	miR5024-3p	1279	6	0.280793	0.686466	no	NA	miR5024-3p:AT1G78830.1	0.999938
AT1G78880.1	miR5021	1839	5.5	0.140396	0.673901	no	NA	miR5021:AT1G78880.1	0.999938
AT1G78882.1	miR5021	1839	5.5	0.140396	0.673901	no	CPuORF56	miR5021:CPuORF56	0.999938
AT1G80300.1	miR5644	1664	6	0.228144	0.504338	no	ATNTT1	miR5644:ATNTT1	0.999938
AT1G80920.1	miR5658	210	5	0.132597	0.453481	no	AtJ8	miR5658:AtJ8	0.999938
AT2G02090.1	miR5645a	2106	6	0.105297	0.681427	no	CHA19	miR5645a:CHA19	0.999938
AT2G04570.1	miR1888b	104	6	0.440688	0.560217	no	NA	miR1888b:AT2G04570.1	0.999938
AT2G04570.1	miR774b-3p	984	6	1.8817	0.327111	no	NA	miR774b-3p:AT2G04570.1	0.999938
AT2G05710.1	miR172d-5p	1570	6	0.212544	0.694915	no	ACO3	miR172d-5p:ACO3	0.999938
AT2G07698.1	miR867	1295	6	0.709781	0.193441	no	NA	miR867:AT2G07698.1	0.999938
AT2G10940.2	miR862-5p	726	6	3.41436	0.24538	no	NA	miR862-5p:AT2G10940.2	0.999938
AT2G11910.2	miR414	286	6	0.551835	0.667178	no	NA	miR414:AT2G11910.2	0.999938
AT2G13360.2	miR5021	1381	5.5	0.157946	0.451642	no	AGT	miR5021:AGT	0.999938
AT2G16600.2	miR773b-5p	405	5	0.75853	0.272801	no	ROC3	miR773b-5p:ROC3	0.999938
AT2G16600.2	miR414	538	5.5	0.39779	0.398722	no	ROC3	miR414:ROC3	0.999938
AT2G16940.3	miR847	334	6	0.142346	0.733361	no	NA	miR847:AT2G16940.3	0.999938
AT2G19480.3	miR5012	1319	5.5	0.584985	0.652442	no	NAP1;2	miR5012:NAP1;2	0.999938
AT2G19730.3	miR8168	455	6	1.56191	0.5544	no	NA	miR8168:AT2G19730.3	0.999938
AT2G20260.1	miR834	241	6	0.454338	0.523454	no	PSAE-2	miR834:PSAE-2	0.999938
AT2G21790.1	miR838	2624	6	0.185245	0.589654	no	ATRNR1	miR838:ATRNR1	0.999938
AT2G22795.1	miR4221	656	6	0.237894	0.651223	no	NA	miR4221:AT2G22795.1	0.999938
AT2G23120.1	miR8176	270	5.5	0.456288	0.435768	no	NA	miR8176:AT2G23120.1	0.999938
AT2G25670.2	miR408-3p	1316	5.5	0.210594	0.493182	no	NA	miR408-3p:AT2G25670.2	0.999938
AT2G26850.1	miR5021	388	6	0.179395	0.82197	no	NA	miR5021:AT2G26850.1	0.999938
AT2G28910.1	miR414	876	5.5	0.144296	0.563271	no	CXIP4	miR414:CXIP4	0.999938
AT2G29700.1	miR831-3p	205	6	0.220344	0.365379	no	ATPH1	miR831-3p:ATPH1	0.999938
AT2G30010.1	miR156g	1152	6	0.458238	0.507752	no	TBL45	miR156g:TBL45	0.999938
AT2G31670.1	miR396b-5p	685	5.5	0.142346	0.481047	no	NA	miR396b-5p:AT2G31670.1	0.999938
AT2G32060.3	miR5666	435	5.5	1.77445	0.43302	no	NA	miR5666:AT2G32060.3	0.999938
AT2G33040.1	miR824-5p	475	5.5	0.165746	0.504571	no	ATP3	miR824-5p:ATP3	0.999938
AT2G34870.1	miR390a-5p	332	6	0.633733	0.690808	no	MEE26	miR390a-5p:MEE26	0.999938
AT2G35240.1	miR5662	108	6	0.134546	0.742292	no	MORF6	miR5662:MORF6	0.999938
AT2G35490.1	miR399c-5p	1185	6	0.202795	0.601301	no	NA	miR399c-5p:AT2G35490.1	0.999938
AT2G35960.1	miR5021	888	6	0.198895	0.726038	no	NHL12	miR5021:NHL12	0.999938
AT2G36060.3	miR414	299	5.5	0.179395	0.563772	no	MMZ3	miR414:MMZ3	0.999938
AT2G36145.1	miR396b-5p	563	6	0.179395	0.685105	no	NA	miR396b-5p:AT2G36145.1	0.999938
AT2G37270.2	miR8166	403	6	0.77023	0.577196	no	ATRPS5B	miR8166:ATRPS5B	0.999938
AT2G37620.2	miR845b	858	6	0.432889	0.767985	no	AAc1	miR845b:AAc1	0.999938
AT2G39730.3	miR863-5p	420	6	0.602534	0.624098	no	RCA	miR863-5p:RCA	0.999938
AT2G40430.3	miR414	951	5.5	0.249593	0.625305	no	NA	miR414:AT2G40430.3	0.999938
AT2G40460.1	miR8166	1325	6	0.161846	0.625329	no	NA	miR8166:AT2G40460.1	0.999938
AT2G40475.1	miR5021	665	6	0.177445	0.72157	no	ASG8	miR5021:ASG8	0.999938
AT2G41430.5	miR3434-5p	702	5.5	0.261293	0.136094	no	CID1	miR3434-5p:CID1	0.999938
AT2G42220.1	miR399a	409	6	0.325641	0.739888	no	NA	miR399a:AT2G42220.1	0.999938
AT2G43710.2	miR5632-5p	1274	6	0.594734	0.593995	no	FAB2	miR5632-5p:FAB2	0.999938
AT2G44060.2	miR414	1037	5.5	0.452388	0.533613	no	NA	miR414:AT2G44060.2	0.999938
AT2G44100.2	miR156i	1564	6	0.208645	0.645772	no	AT-GDI1	miR156i:AT-GDI1	0.999938
AT2G44730.1	miR414	861	6	0.276893	0.734255	no	NA	miR414:AT2G44730.1	0.999938
AT2G46490.1	miR447a-3p	240	6	0.177445	0.628448	no	NA	miR447a-3p:AT2G46490.1	0.999938
AT2G47110.2	miR838	303	6	0.154046	0.208551	no	UBI6	miR838:UBI6	0.999938
AT3G01120.1	miR8177	1768	6	0.208645	0.406759	no	AtCGS1	miR8177:AtCGS1	0.999938
AT3G01130.2	miR5021	290	5	0.194995	0.527471	no	NA	miR5021:AT3G01130.2	0.999938
AT3G01230.1	miR859	541	6	0.272993	0.360118	no	NA	miR859:AT3G01230.1	0.999938
AT3G01390.2	miR4221	411	6	0.280793	0.573737	no	AVMA10	miR4221:AVMA10	0.999938
AT3G01500.3	miR5024-3p	748	6	0.713681	0.254084	no	ATBCA1	miR5024-3p:ATBCA1	0.999938
AT3G02760.1	miR4227	2215	6	0.109197	0.602684	no	NA	miR4227:AT3G02760.1	0.999938
AT3G03920.1	miR1886.3	404	6	0.165746	0.315507	no	NA	miR1886.3:AT3G03920.1	0.999938
AT3G05220.2	miR414	460	5.5	0.183295	0.638212	no	NA	miR414:AT3G05220.2	0.999938
AT3G05590.1	miR773a	398	6	0.440688	0.398974	no	RPL18	miR773a:RPL18	0.999938
AT3G06125.3	miR2111a-5p	132	6	0.155996	0.467965	no	NA	miR2111a-5p:AT3G06125.3	0.999938
AT3G06170.1	miR860	1360	6	0.319792	0.747194	no	NA	miR860:AT3G06170.1	0.999938
AT3G07820.1	miR833a-5p	992	6	0.413389	0.176667	no	NA	miR833a-5p:AT3G07820.1	0.999938
AT3G08520.1	miR831-3p	29	6	2.20734	0.691155	no	NA	miR831-3p:AT3G08520.1	0.999938
AT3G08690.2	miR156i	900	6	0.210594	0.813852	no	ATUBC11	miR156i:ATUBC11	0.999938
AT3G09740.1	miR447a-3p	606	6	0.202795	0.495118	no	ATSYP71	miR447a-3p:ATSYP71	0.999938
AT3G12110.1	miR8168	1161	6	0.284693	0.445509	no	ACT11	miR8168:ACT11	0.999938
AT3G12550.2	miR159b-5p	1747	6	0.142346	0.764962	no	FDM3	miR159b-5p:FDM3	0.999938
AT3G13390.1	miR407	1945	6	0.189145	0.291391	no	sks11	miR407:sks11	0.999938
AT3G13470.1	miR833b	336	6	0.306142	0.783584	no	Cpn60beta2	miR833b:Cpn60beta2	0.999938
AT3G13750.1	miR8181	2633	6	0.196945	0.725715	no	BGAL1	miR8181:BGAL1	0.999938
AT3G14210.1	miR859	1044	6	0.815079	0.330924	no	ESM1	miR859:ESM1	0.999938
AT3G15040.1	miR414	753	5.5	0.142346	0.695076	no	NA	miR414:AT3G15040.1	0.999938
AT3G15450.3	miR2933a	170	5.5	0.670782	0.490226	no	NA	miR2933a:AT3G15450.3	0.999938
AT3G15480.1	miR858b	227	5.5	0.173545	0.573266	no	NA	miR858b:AT3G15480.1	0.999938
AT3G16850.1	miR395a	815	6	0.0935975	0.663839	no	NA	miR395a:AT3G16850.1	0.999938
AT3G17160.1	miR847	291	6	0.0662983	0.51645	no	NA	miR847:AT3G17160.1	0.999938
AT3G17510.2	miR414	688	5.5	0.189145	0.671746	no	CIPK1	miR414:CIPK1	0.999938
AT3G18850.5	miR5662	1004	6	0.606434	0.50331	no	LPAT5	miR5662:LPAT5	0.999938
AT3G19930.1	miR4227	1502	6	0.325641	0.796213	no	ATSTP4	miR4227:ATSTP4	0.999938
AT3G21970.1	miR5638a	738	6	0.251543	0.747332	no	NA	miR5638a:AT3G21970.1	0.999938
AT3G22420.2	miR837-5p	1844	6	0.193045	0.704201	no	ATWNK2	miR837-5p:ATWNK2	0.999938
AT3G23810.1	miR408-5p	709	5	0.308092	0.498082	no	ATSAHH2	miR408-5p:ATSAHH2	0.999938
AT3G26570.2	miR1888b	1304	6	0.278843	0.747105	no	ORF02	miR1888b:ORF02	0.999938
AT3G27160.1	miR1886.1	90	6	0.208645	0.569264	no	GHS1	miR1886.1:GHS1	0.999938
AT3G28500.1	miR2936	237	6	0.196945	0.228971	no	NA	miR2936:AT3G28500.1	0.999938
AT3G28790.1	miR5021	1897	5	0.567435	0.182821	no	NA	miR5021:AT3G28790.1	0.999938
AT3G28830.1	miR854a	1623	5	1.53266	0.41472	no	NA	miR854a:AT3G28830.1	0.999938
AT3G29200.1	miR833a-5p	1182	6	0.37439	0.709207	no	ATCM1	miR833a-5p:ATCM1	0.999938
AT3G42170.1	miR870-5p	2043	5.5	0.165746	0.654205	no	DAYSLEEPER	miR870-5p:DAYSLEEPER	0.999938
AT3G49910.1	miR172b-5p	606	5.5	0.146246	0.353726	no	NA	miR172b-5p:AT3G49910.1	0.999938
AT3G50820.1	miR782	1083	6	0.692232	0.458	no	OEC33	miR782:OEC33	0.999938
AT3G51160.1	miR839-5p	782	6	0.175495	0.67218	no	GMD2	miR839-5p:GMD2	0.999938
AT3G52590.1	miR5024-3p	122	6	1.64381	0.608863	no	EMB2167	miR5024-3p:EMB2167	0.999938
AT3G53260.1	miR415	2333	6	0.39389	0.561168	no	ATPAL2	miR415:ATPAL2	0.999938
AT3G53370.2	miR866-3p	263	5	0.167696	0.514535	no	NA	miR866-3p:AT3G53370.2	0.999938
AT3G53420.2	miR5638b	946	6	0.193045	0.149599	no	AtPIP2;1	miR5638b:AtPIP2;1	0.999938
AT3G53580.1	miR858a	993	5.5	0.167696	0.529083	no	NA	miR858a:AT3G53580.1	0.999938
AT3G53650.1	miR4243	160	5.5	0.00779979	0.639777	no	NA	miR4243:AT3G53650.1	0.999938
AT3G55170.2	miR5015	336	6	0.407539	0.75204	no	NA	miR5015:AT3G55170.2	0.999938
AT3G56020.1	miR831-3p	71	6	2.54273	0.672444	no	NA	miR831-3p:AT3G56020.1	0.999938
AT3G56360.1	miR779.1	621	6	0.243744	0.663144	no	NA	miR779.1:AT3G56360.1	0.999938
AT3G56370.1	miR159b-5p	3080	6	0.218394	0.325802	no	NA	miR159b-5p:AT3G56370.1	0.999938
AT3G58640.2	miR390b-3p	2487	6	0.169646	0.632847	no	NA	miR390b-3p:AT3G58640.2	0.999938
AT3G58730.1	miR168b-3p	814	6	0.228144	0.41224	no	NA	miR168b-3p:AT3G58730.1	0.999938
AT3G61580.1	miR5021	1144	6	0.446538	0.76412	no	AtSLD1	miR5021:AtSLD1	0.999938
AT3G62250.1	miR838	281	6	1.39031	0.365938	no	UBQ5	miR838:UBQ5	0.999938
AT3G63130.2	miR847	1841	6	0.126747	0.488929	no	ATRANGAP1	miR847:ATRANGAP1	0.999938
AT4G01050.1	miR397b	911	6	0.232044	0.498357	no	TROL	miR397b:TROL	0.999938
AT4G01150.2	miR3440b-3p	252	5.5	0.200845	0.202189	no	NA	miR3440b-3p:AT4G01150.2	0.999938
AT4G01470.1	miR397b	586	6	0.559635	0.784278	no	ATTIP1.3	miR397b:ATTIP1.3	0.999938
AT4G01850.2	miR8165	303	6	0.306142	0.721156	no	AtSAM2	miR8165:AtSAM2	0.999938
AT4G02940.1	miR8172	1827	6	0.132597	0.677094	no	NA	miR8172:AT4G02940.1	0.999938
AT4G03080.1	miR158a-3p	2586	6	0.124797	0.637503	no	BSL1	miR158a-3p:BSL1	0.999938
AT4G04460.2	miR395b	931	6	0.427039	0.715496	no	NA	miR395b:AT4G04460.2	0.999938
AT4G04640.1	miR5021	1310	6	0.198895	0.337481	no	ATPC1	miR5021:ATPC1	0.999938
AT4G05180.1	miR8171	365	5.5	1.12902	0.532905	no	PSBQ	miR8171:PSBQ	0.999938
AT4G08350.1	miR777	2334	6	0.194995	0.653457	no	GTA02	miR777:GTA02	0.999938
AT4G10030.1	miR5641	1259	5.5	0.152096	0.643727	no	NA	miR5641:AT4G10030.1	0.999938
AT4G10430.3	miR1886.1	154	6	0.150146	0.804867	no	NA	miR1886.1:AT4G10430.3	0.999938
AT4G13930.1	miR414	1592	5.5	0.454338	0.568543	no	SHM4	miR414:SHM4	0.999938
AT4G15790.1	miR5662	242	6	0.226194	0.749653	no	NA	miR5662:AT4G15790.1	0.999938
AT4G15790.1	miR172d-5p	457	6	0.175495	0.675948	no	NA	miR172d-5p:AT4G15790.1	0.999938
AT4G16720.1	miR5644	520	5.5	1.30062	0.415021	no	NA	miR5644:AT4G16720.1	0.999938
AT4G18970.2	miR862-5p	1262	6	0.891127	0.479918	no	NA	miR862-5p:AT4G18970.2	0.999938
AT4G20050.2	miR8180	805	6	0.169646	0.677141	no	QRT3	miR8180:QRT3	0.999938
AT4G20410.1	miR841a-3p	931	6	0.222294	0.478925	no	GAMMA-SNAP	miR841a-3p:GAMMA-SNAP	0.999938
AT4G20980.4	miR5651	1477	5.5	0.237894	0.607594	no	NA	miR5651:AT4G20980.4	0.999938
AT4G22220.1	miR5654-3p	444	6	0.514786	0.379715	no	ATISU1	miR5654-3p:ATISU1	0.999938
AT4G24270.2	miR414	2114	6	0.146246	0.730379	no	EMB140	miR414:EMB140	0.999938
AT4G24640.1	miR413	549	6	0.690282	0.586557	no	APPB1	miR413:APPB1	0.999938
AT4G24770.1	miR854a	1111	5.5	0.206695	0.514909	no	ATRBP31	miR854a:ATRBP31	0.999938
AT4G24770.1	miR156a-3p	492	6	0.302242	0.64975	no	ATRBP31	miR156a-3p:ATRBP31	0.999938
AT4G25780.1	miR2937	198	6	0.140396	0.692247	no	NA	miR2937:AT4G25780.1	0.999938
AT4G26630.2	miR847	2389	6	0.218394	0.621828	no	NA	miR847:AT4G26630.2	0.999938
AT4G26630.2	miR414	2451	6	0.161846	0.595338	no	NA	miR414:AT4G26630.2	0.999938
AT4G27430.2	miR5661	700	6	0.36659	0.629208	no	CIP7	miR5661:CIP7	0.999938
AT4G27580.1	miR822-5p	654	6	0.136496	0.706607	no	NA	miR822-5p:AT4G27580.1	0.999938
AT4G28050.1	miR169a-3p	817	6	0.553785	0.767787	no	TET7	miR169a-3p:TET7	0.999938
AT4G28400.1	miR5662	423	6	0.115047	0.499927	no	NA	miR5662:AT4G28400.1	0.999938
AT4G28780.1	miR829-5p	831	6	0.120897	0.643111	no	NA	miR829-5p:AT4G28780.1	0.999938
AT4G31330.1	miR1886.1	461	6	0.542086	0.758352	no	NA	miR1886.1:AT4G31330.1	0.999938
AT4G32520.2	miR4239	1507	6	0.134546	0.585444	no	AtSHMT3	miR4239:AtSHMT3	0.999938
AT4G32600.1	miR858a	1343	6	0.204745	0.739183	no	NA	miR858a:AT4G32600.1	0.999938
AT4G32610.1	miR414	682	6	0.235944	0.687579	no	NA	miR414:AT4G32610.1	0.999938
AT4G33110.2	miR5644	594	6	0.179395	0.57285	no	NA	miR5644:AT4G33110.2	0.999938
AT4G33680.1	miR5658	1468	6	0.171595	0.679036	no	AGD2	miR5658:AGD2	0.999938
AT4G35090.2	miR169a-3p	957	6	0.280793	0.385052	no	CAT2	miR169a-3p:CAT2	0.999938
AT4G35300.5	miR837-5p	2294	5.5	0.132597	0.681863	no	TMT2	miR837-5p:TMT2	0.999938
AT4G36910.1	miR5654-5p	633	6	0.155996	0.669238	no	CBSX1	miR5654-5p:CBSX1	0.999938
AT4G37980.2	miR5630a	1064	6	0.169646	0.595763	no	ATCAD7	miR5630a:ATCAD7	0.999938
AT4G37980.2	miR2112-5p	978	6	0.163796	0.555798	no	ATCAD7	miR2112-5p:ATCAD7	0.999938
AT4G39330.2	miR841b-5p	348	6	0.214494	0.475869	no	ATCAD9	miR841b-5p:ATCAD9	0.999938
AT5G01530.1	miR5662	896	5.5	3.623	0.62164	no	LHCB4.1	miR5662:LHCB4.1	0.999938
AT5G05010.2	miR841b-3p	1436	6	0.208645	0.556987	no	NA	miR841b-3p:AT5G05010.2	0.999938
AT5G07600.1	miR849	437	6	0.493337	0.601676	no	NA	miR849:AT5G07600.1	0.999938
AT5G09960.1	miR8173	380	6	0.226194	0.682155	no	NA	miR8173:AT5G09960.1	0.999938
AT5G11740.1	miR5020b	190	5	1.56386	0.292391	no	AGP15	miR5020b:AGP15	0.999938
AT5G12140.1	miR846-5p	430	6	0.306142	0.553659	no	ATCYS1	miR846-5p:ATCYS1	0.999938
AT5G13140.1	miR3440b-3p	681	6	0.179395	0.501591	no	NA	miR3440b-3p:AT5G13140.1	0.999938
AT5G13240.1	miR831-3p	772	6	0.37439	0.738948	no	NA	miR831-3p:AT5G13240.1	0.999938
AT5G13810.1	miR5640	472	6	0.354891	0.760351	no	NA	miR5640:AT5G13810.1	0.999938
AT5G15530.1	miR3434-3p	762	6	0.518686	0.592344	no	BCCP2	miR3434-3p:BCCP2	0.999938
AT5G15780.1	miR5021	503	6	0.183295	0.441708	no	NA	miR5021:AT5G15780.1	0.999938
AT5G16920.1	miR166a-5p	728	6	0.187195	0.340543	no	NA	miR166a-5p:AT5G16920.1	0.999938
AT5G17920.2	miR870-5p	816	6	0.165746	0.395698	no	ATCIMS	miR870-5p:ATCIMS	0.999938
AT5G18460.1	miR865-3p	1665	6	0.140396	0.776843	no	NA	miR865-3p:AT5G18460.1	0.999938
AT5G18670.1	miR5021	1125	5	0.136496	0.498645	no	BAM9	miR5021:BAM9	0.999938
AT5G19350.2	miR5013	516	6	0.191095	0.70712	no	NA	miR5013:AT5G19350.2	0.999938
AT5G20165.3	miR8172	536	6	0.120897	0.517946	no	NA	miR8172:AT5G20165.3	0.999938
AT5G20240.1	miR840-3p	402	6	0.228144	0.262121	no	PI	miR840-3p:PI	0.999938
AT5G20890.1	miR5663-5p	866	6	0.358791	0.752656	no	NA	miR5663-5p:AT5G20890.1	0.999938
AT5G21100.1	miR5647	1464	6	0.534286	0.732734	no	NA	miR5647:AT5G21100.1	0.999938
AT5G21274.1	miR168b-3p	240	6	0.676632	0.753688	no	ACAM-6	miR168b-3p:ACAM-6	0.999938
AT5G21940.1	miR5658	806	6	0.329541	0.454606	no	NA	miR5658:AT5G21940.1	0.999938
AT5G22480.1	miR831-3p	1555	6	0.452388	0.115535	no	NA	miR831-3p:AT5G22480.1	0.999938
AT5G23740.1	miR399f	552	6	0.218394	0.290507	no	RPS11-BETA	miR399f:RPS11-BETA	0.999938
AT5G23940.1	miR5645a	976	5.5	0.436789	0.331932	no	DCR	miR5645a:DCR	0.999938
AT5G24890.1	miR390b-3p	440	5.5	0.142346	0.567761	no	NA	miR390b-3p:AT5G24890.1	0.999938
AT5G25760.2	miR395b	586	6	0.116997	0.477429	no	PEX4	miR395b:PEX4	0.999938
AT5G26360.1	miR3434-5p	556	6	0.226194	0.639817	no	NA	miR3434-5p:AT5G26360.1	0.999938
AT5G26830.1	miR870-5p	2214	6	0.142346	0.71808	no	NA	miR870-5p:AT5G26830.1	0.999938
AT5G27990.1	miR414	543	6	0.37049	0.766588	no	NA	miR414:AT5G27990.1	0.999938
AT5G28640.1	miR779.1	944	6	0.475787	0.58768	no	AN3	miR779.1:AN3	0.999938
AT5G33370.2	miR5663-3p	133	5.5	0.310042	0.392923	no	NA	miR5663-3p:AT5G33370.2	0.999938
AT5G40770.1	miR396b-5p	496	6	0.148196	0.50421	no	ATPHB3	miR396b-5p:ATPHB3	0.999938
AT5G40950.1	miR841a-3p	261	5.5	0.469938	0.59132	no	RPL27	miR841a-3p:RPL27	0.999938
AT5G41050.1	miR5650	674	6	0.304192	0.61767	no	NA	miR5650:AT5G41050.1	0.999938
AT5G42950.1	miR5015	4990	5.5	0.163796	0.488075	no	NA	miR5015:AT5G42950.1	0.999938
AT5G43330.1	miR171c-5p	640	5.5	0.198895	0.607043	no	c-NAD-MDH2	miR171c-5p:c-NAD-MDH2	0.999938
AT5G47550.1	miR833a-5p	188	6	0.194995	0.602688	no	NA	miR833a-5p:AT5G47550.1	0.999938
AT5G48360.1	miR8166	2269	6	0.37049	0.583831	no	NA	miR8166:AT5G48360.1	0.999938
AT5G50020.2	miR414	1387	6	0.177445	0.314524	no	NA	miR414:AT5G50020.2	0.999938
AT5G52650.1	miR866-3p	155	5	0.39779	0.504872	no	NA	miR866-3p:AT5G52650.1	0.999938
AT5G54160.1	miR5634	591	5.5	0.602534	0.661791	no	ATOMT1	miR5634:ATOMT1	0.999938
AT5G55180.2	miR172b-5p	1367	5.5	0.138446	0.175703	no	NA	miR172b-5p:AT5G55180.2	0.999938
AT5G55660.1	miR837-5p	436	5.5	0.155996	0.439842	no	NA	miR837-5p:AT5G55660.1	0.999938
AT5G55920.1	miR5649a	1541	5.5	0.310042	0.632712	no	OLI2	miR5649a:OLI2	0.999938
AT5G55940.1	miR156i	825	6	0.140396	0.728462	no	emb2731	miR156i:emb2731	0.999938
AT5G56000.1	miR837-5p	1653	6	0.0584985	0.618379	no	AtHsp90.4	miR837-5p:AtHsp90.4	0.999938
AT5G57020.1	miR3440b-5p	1483	6	0.177445	0.55153	no	ATNMT1	miR3440b-5p:ATNMT1	0.999938
AT5G59300.1	miR824-3p	198	6	0.187195	0.672868	no	ATUBC7	miR824-3p:ATUBC7	0.999938
AT5G59850.1	miR776	311	6	0.292492	0.234479	no	NA	miR776:AT5G59850.1	0.999938
AT5G59870.1	miR5654-3p	348	5.5	0.898926	0.572562	no	HTA6	miR5654-3p:HTA6	0.999938
AT5G62210.1	miR2112-5p	659	6	2.65778	0.525321	no	NA	miR2112-5p:AT5G62210.1	0.999938
AT5G62890.4	miR4227	1337	6	0.126747	0.572774	no	NA	miR4227:AT5G62890.4	0.999938
AT5G64030.1	miR837-5p	2637	6	0.202795	0.587555	no	NA	miR837-5p:AT5G64030.1	0.999938
AT5G64080.2	miR854a	151	5.5	0.206695	0.450115	no	AtXYP1	miR854a:AtXYP1	0.999938
AT5G64310.1	miR417	426	6	0.146246	0.243225	no	AGP1	miR417:AGP1	0.999938
AT5G65670.2	miR5998a	817	6	0.230094	0.64712	no	IAA9	miR5998a:IAA9	0.999938
AT5G67300.1	miR858b	359	6	0.116997	0.576388	no	ATMYB44	miR858b:ATMYB44	0.999938
ATCG00500.1	miR5638a	1234	6	0.38804	0.39572	no	ACCD	miR5638a:ACCD	0.999938

## Sheet: Col-0 (+Xrn1) (biorep #1)
Target transcript	miRNA	miRNA slice site position in target transcript	Allen score of sRNA:target duplex	Slice site RPM	Slice site RPM + 1/Maximum adjacent site RPM + 1	Previously verified by 5' RACE?	Target gene common name	Interaction name	P-value adjusted for multiple testing
AT1G70700.2	miR169d	787	2.5	2.81808	0.657758	no	JAZ9	miR169d:JAZ9	0
AT2G27400.1	miR173-5p	378	2.5	0.94308	1.94308	yes	TAS1a	miR173-5p:TAS1a	0
AT2G39681.1	miR173-5p	417	2.5	0.284598	0.923756	yes	TAS2	miR173-5p:TAS2	0
AT2G42200.1	miR156j	946	0	0.31808	0.870944	no	AtSPL9	miR156j:AtSPL9	0
AT5G09860.2	miR414	476	2	0.435268	1.13204	no	AtHPR1	miR414:AtHPR1	0
AT5G39740.2	miR414	997	1.5	1.28906	0.209478	no	OLI7	miR414:OLI7	0
AT5G51850.1	miR5641	1007	1	0.825893	1.82589	no	TRM24	miR5641:TRM24	0
AT3G03380.1	miR3434-5p	2584	3	1.47879	2.47879	no	DEG7	miR3434-5p:DEG7	0.0757827
AT2G39020.1	miR414	909	2.5	3.33705	1.44676	no	NA	miR414:AT2G39020.1	0.135741
AT3G52910.1	miR396a-5p	752	4	1.76897	2.59519	yes	AtGRF4	miR396a-5p:AtGRF4	0.159727
AT1G08125.3	miR390a-3p	887	5	10.7087	9.23503	no	NA	miR390a-3p:AT1G08125.3	0.230414
AT4G04614.1	miR414	134	2.5	1.15513	1.02932	no	NA	miR414:AT4G04614.1	0.230414
AT5G19590.1	miR854a	60	2	0.200893	0.579741	no	NA	miR854a:AT5G19590.1	0.230414
AT4G16146.1	miR5021	609	2.5	1.02679	1.7197	no	NA	miR5021:AT4G16146.1	0.295719
AT1G15280.2	miR414	188	3.5	1.76339	1.80598	no	NA	miR414:AT1G15280.2	0.339891
AT3G26030.1	miR5021	58	4	1.66295	2.22783	no	ATB' DELTA	miR5021:ATB' DELTA	0.369351
AT1G69670.1	miR858a	1751	4.5	1.35045	2.35045	no	ATCUL3B	miR858a:ATCUL3B	0.58874
AT3G09035.1	miR5020c	540	4.5	2.96875	2.40921	no	NA	miR5020c:AT3G09035.1	0.588846
AT1G52827.1	miR1887	256	3.5	1.11607	1.76208	no	ATCDT1	miR1887:ATCDT1	0.605837
AT1G05090.1	miR5638a	901	3	0.195312	1.19531	no	NA	miR5638a:AT1G05090.1	0.64264
AT2G28370.1	miR5021	934	6	2.11496	3.11496	no	NA	miR5021:AT2G28370.1	0.64264
AT2G43970.2	miR5658	546	2	0.31808	0.813921	no	AtLARP6b	miR5658:AtLARP6b	0.64264
AT2G44130.1	miR414	1246	3	1.12723	1.02418	no	NA	miR414:AT2G44130.1	0.64264
AT3G09200.2	miR5662	663	3.5	1.76897	1.05083	no	NA	miR5662:AT3G09200.2	0.64264
AT4G20720.1	miR5638a	1061	3	0.195312	1.19531	no	NA	miR5638a:AT4G20720.1	0.64264
AT5G24890.1	miR390b-3p	440	5.5	1.77455	2.77455	no	NA	miR390b-3p:AT5G24890.1	0.64264
AT1G19870.1	miR4227	2242	4	1.60714	1.27233	no	iqd32	miR4227:iqd32	0.670987
AT1G47960.1	miR414	122	3.5	0.418527	0.774528	no	ATC/VIF1	miR414:ATC/VIF1	0.670987
AT1G62680.1	miR5658	1915	2.5	0.0111607	0.543818	no	NA	miR5658:AT1G62680.1	0.670987
AT2G19572.1	miR847	390	4.5	0.703125	1.70312	no	NA	miR847:AT2G19572.1	0.670987
AT2G43820.1	miR5650	1388	5.5	1.34487	2.34487	no	ATSAGT1	miR5650:ATSAGT1	0.670987
AT3G13200.1	miR414	505	3	1.11049	0.398021	no	EMB2769	miR414:EMB2769	0.670987
AT3G28007.1	miR414	782	3.5	0.178571	0.756447	no	AtSWEET4	miR414:AtSWEET4	0.670987
AT4G12650.1	miR4227	625	3.5	0.418527	0.897599	no	NA	miR4227:AT4G12650.1	0.670987
AT4G27340.1	miR835-3p	216	3.5	0.262277	1.26228	no	NA	miR835-3p:AT4G27340.1	0.670987
AT5G04900.1	miR5014a-5p	450	4.5	0.613839	1.61384	no	NOL	miR5014a-5p:NOL	0.670987
AT5G17580.1	miR414	1425	5.5	1.18304	2.18304	no	NA	miR414:AT5G17580.1	0.670987
AT5G44650.1	miR414	524	4	1.99777	1.1187	no	AtCEST	miR414:AtCEST	0.670987
AT5G51840.1	miR839-5p	776	4	1.44531	1.21993	no	NA	miR839-5p:AT5G51840.1	0.670987
AT5G60650.1	miR5021	79	4	0.78125	1.75192	no	NA	miR5021:AT5G60650.1	0.670987
AT1G63490.1	miR397b	1417	4.5	0.334821	1.33482	no	NA	miR397b:AT1G63490.1	0.671816
AT2G11910.2	miR414	502	3	3.20312	0.312895	no	NA	miR414:AT2G11910.2	0.671816
AT2G45290.1	miR3434-5p	2260	5	0.669643	1.66964	no	NA	miR3434-5p:AT2G45290.1	0.671816
AT3G60040.1	miR5655	1182	3.5	0.0837054	1.02103	no	NA	miR5655:AT3G60040.1	0.671816
AT4G23680.1	miR5658	557	2	0.362723	0.11336	no	NA	miR5658:AT4G23680.1	0.671816
AT5G51370.2	miR399c-5p	1107	6	1.35603	2.35603	no	NA	miR399c-5p:AT5G51370.2	0.671816
AT1G06630.3	miR5655	594	3.5	0.189732	0.977085	no	NA	miR5655:AT1G06630.3	0.67481
AT2G19740.1	miR847	414	3.5	1.52344	0.596413	no	NA	miR847:AT2G19740.1	0.67481
AT1G73680.2	miR158a-5p	1319	5.5	0.686384	1.68638	no	ALPHA DOX2	miR158a-5p:ALPHA DOX2	0.684666
AT3G02200.2	miR408-3p	763	4.5	0.837054	1.14226	no	NA	miR408-3p:AT3G02200.2	0.684666
AT3G49010.5	miR5662	83	3.5	0.558036	0.390381	no	ATBBC1	miR5662:ATBBC1	0.684666
AT4G37980.2	miR5012	810	5	4.57031	1.69416	no	ATCAD7	miR5012:ATCAD7	0.684666
AT5G13940.1	miR4243	2152	5	0.541295	1.5413	no	NA	miR4243:AT5G13940.1	0.684666
AT4G37250.1	miR414	1558	4.5	0.284598	1.2846	no	NA	miR414:AT4G37250.1	0.689064
AT1G35560.1	miR5021	622	3	0.491071	1.49107	no	NA	miR5021:AT1G35560.1	0.709632
AT1G50000.2	miR773a	715	5.5	1.34487	2.34487	no	NA	miR773a:AT1G50000.2	0.709632
AT1G52855.1	miR858a	184	5.5	1.35045	2.35045	no	NA	miR858a:AT1G52855.1	0.709632
AT1G66230.1	miR858b	467	4	0.345982	1.34598	yes	AtMYB20	miR858b:AtMYB20	0.709632
AT2G02220.1	miR5021	3136	6	1.45647	2.45647	no	ATPSKR1	miR5021:ATPSKR1	0.709632
AT2G31090.1	miR5021	384	6	1.33371	2.33371	no	NA	miR5021:AT2G31090.1	0.709632
AT2G39770.2	miR773b-3p	378	4	1.06585	1.32593	no	CYT1	miR773b-3p:CYT1	0.709632
AT4G24940.1	miR414	1071	4.5	1.5067	1.83198	no	AT-SAE1-1	miR414:AT-SAE1-1	0.709632
AT4G34990.1	miR858a	378	5	1.23884	1.97441	no	AtMYB32	miR858a:AtMYB32	0.709632
AT5G10320.3	miR5021	211	4.5	0.530134	1.53013	no	NA	miR5021:AT5G10320.3	0.714953
AT5G19350.2	miR156a-5p	560	5	0.597098	1.5971	no	NA	miR156a-5p:AT5G19350.2	0.714953
AT5G59000.1	miR414	761	3.5	0.0948661	0.408579	no	NA	miR414:AT5G59000.1	0.714953
AT5G64030.1	miR162a-5p	2071	5	0.853795	1.40051	no	NA	miR162a-5p:AT5G64030.1	0.714953
AT1G16720.1	miR868-3p	1851	4	0.591518	0.800674	no	HCF173	miR868-3p:HCF173	0.720156
AT1G53070.1	miR833a-5p	666	5	1.64062	1.79106	no	NA	miR833a-5p:AT1G53070.1	0.723377
AT2G18030.2	miR5655	210	4.5	0.652902	1.6529	no	MSRA5	miR5655:MSRA5	0.723377
AT3G56110.2	miR854a	472	3.5	0.206473	0.745003	no	PRA1.B1	miR854a:PRA1.B1	0.723377
AT5G07990.1	miR774b-5p	102	4	0.518973	1.19806	no	CYP75B1	miR774b-5p:CYP75B1	0.723377
AT5G17770.1	miR159b-5p	354	3.5	0.178571	0.52642	no	ATCBR	miR159b-5p:ATCBR	0.723377
AT3G25520.2	miR414	699	3.5	0.94308	0.315914	no	ATL5	miR414:ATL5	0.726955
AT5G15220.1	miR5662	222	6	1.26674	2.08094	no	NA	miR5662:AT5G15220.1	0.726955
AT2G36410.3	miR5029	1006	3	0.697545	0.253247	no	NA	miR5029:AT2G36410.3	0.746566
AT1G05230.4	miR391-3p	2172	5.5	0.608259	1.60826	no	HDG2	miR391-3p:HDG2	0.776333
AT1G06040.2	miR1886.1	706	3.5	1.42857	0.505929	no	BBX24	miR1886.1:BBX24	0.776333
AT1G48160.1	miR782	883	4	0.457589	0.64462	no	NA	miR782:AT1G48160.1	0.776333
AT1G67080.1	miR167a-5p	303	4	0.262277	0.779462	no	ABA4	miR167a-5p:ABA4	0.776333
AT1G70780.1	miR172d-5p	414	4	1.33371	0.824528	no	NA	miR172d-5p:AT1G70780.1	0.776333
AT1G70782.1	miR172d-5p	414	4	1.33371	0.824528	no	CPuORF28	miR172d-5p:CPuORF28	0.776333
AT2G17760.1	miR5021	1688	3	1.32812	0.885399	no	NA	miR5021:AT2G17760.1	0.776333
AT2G30260.1	miR5662	749	4	0.373884	0.699035	no	U2B''	miR5662:U2B''	0.776333
AT3G11250.1	miR5662	764	4	0.669643	0.743908	no	NA	miR5662:AT3G11250.1	0.776333
AT3G12480.1	miR5637	1198	6	0.697545	1.69755	no	NF-YC11	miR5637:NF-YC11	0.776333
AT3G23810.1	miR172d-5p	976	3.5	0.970982	0.343179	no	ATSAHH2	miR172d-5p:ATSAHH2	0.776333
AT3G28980.1	miR3434-5p	345	5	1.70201	1.31148	no	NA	miR3434-5p:AT3G28980.1	0.776333
AT3G29075.1	miR414	489	5.5	3.7221	1.56936	no	NA	miR414:AT3G29075.1	0.776333
AT3G55160.1	miR833b	5995	4.5	0.184152	0.946477	no	NA	miR833b:AT3G55160.1	0.776333
AT4G00355.4	miR156b-3p	837	5.5	1.75781	1.64077	no	ATI2	miR156b-3p:ATI2	0.776333
AT4G01883.1	miR5021	215	5	0.46317	1.40064	no	NA	miR5021:AT4G01883.1	0.776333
AT4G08670.1	miR5658	48	6	0.636161	1.63616	no	NA	miR5658:AT4G08670.1	0.776333
AT4G10970.6	miR172b-5p	100	4.5	0.284598	1.02676	no	NA	miR172b-5p:AT4G10970.6	0.776333
AT5G08139.1	miR4221	1225	5.5	0.876116	1.56227	no	NA	miR4221:AT5G08139.1	0.776333
AT5G38610.1	miR157a-5p	589	4	0.574777	0.742242	no	NA	miR157a-5p:AT5G38610.1	0.776333
AT5G52060.1	miR5022	1452	4	0.184152	0.585863	no	ATBAG1	miR5022:ATBAG1	0.776333
AT1G53280.1	miR5642a	1320	4.5	1.43973	0.824592	no	AtDJ1B	miR5642a:AtDJ1B	0.795816
AT1G54280.1	miR5021	90	5	0.323661	1.32366	no	NA	miR5021:AT1G54280.1	0.795816
AT1G65910.1	miR868-3p	514	5.5	0.385045	1.38505	no	anac028	miR868-3p:anac028	0.795816
AT1G75270.1	miR832-3p	731	5	2.56138	1.17923	no	DHAR2	miR832-3p:DHAR2	0.795816
AT2G01690.2	miR5645a	2118	4.5	0.362723	0.953161	no	NA	miR5645a:AT2G01690.2	0.795816
AT2G07697.1	miR5017-5p	3075	6	0.440848	1.44085	no	NA	miR5017-5p:AT2G07697.1	0.795816
AT2G11910.2	miR414	442	4	0.993304	0.419151	no	NA	miR414:AT2G11910.2	0.795816
AT3G52560.4	miR5652	453	4.5	0.998884	0.795645	no	MMZ4	miR5652:MMZ4	0.795816
AT4G02570.4	miR830-5p	2406	5	1.04911	1.20315	no	ATCUL1	miR830-5p:ATCUL1	0.795816
AT4G14850.1	miR8176	72	5.5	1.67411	1.25052	no	LOI1	miR8176:LOI1	0.795816
AT4G25370.1	miR824-3p	564	4	1.07143	0.335867	no	NA	miR824-3p:AT4G25370.1	0.795816
AT5G26000.2	miR4227	851	4	1.36161	0.634294	no	AtTGG1	miR4227:AtTGG1	0.795816
AT5G42270.1	miR390b-3p	1256	5	1.37835	1.14202	no	FTSH5	miR390b-3p:FTSH5	0.795816
AT5G28050.2	miR5021	786	3	0.524554	0.57857	no	NA	miR5021:AT5G28050.2	0.797207
AT4G25210.1	miR864-3p	589	4	0.46317	0.686029	no	NA	miR864-3p:AT4G25210.1	0.797653
AT1G63640.2	miR414	3005	4.5	0.424107	0.812222	no	NA	miR414:AT1G63640.2	0.79941
AT2G19480.3	miR414	1205	4	0.976562	0.353776	no	NAP1;2	miR414:NAP1;2	0.79941
AT3G13860.1	miR162a-3p	1132	6	0.429688	1.42969	no	HSP60-3A	miR162a-3p:HSP60-3A	0.79941
AT3G42660.1	miR865-3p	833	6	0.580357	1.58036	no	NA	miR865-3p:AT3G42660.1	0.79941
AT3G50370.1	miR5012	4206	5.5	0.373884	1.37388	no	NA	miR5012:AT3G50370.1	0.79941
AT3G51880.4	miR414	542	4	0.273438	0.29552	no	AtHMGB1	miR414:AtHMGB1	0.79941
AT3G60720.1	miR854a	496	5	0.379464	1.15406	no	PDLP8	miR854a:PDLP8	0.79941
AT5G37020.2	miR167a-5p	2380	4	0.452009	0.448467	yes	ARF8	miR167a-5p:ARF8	0.79941
AT2G37690.1	miR3434-3p	573	5	0.0948661	1.09487	no	NA	miR3434-3p:AT2G37690.1	0.811551
AT1G69640.1	miR5021	750	5	0.809152	1.23646	no	SBH1	miR5021:SBH1	0.822104
AT3G47730.1	miR5021	193	5	0.228795	1.2288	no	ABCA2	miR5021:ABCA2	0.822104
AT4G20320.2	miR172d-5p	924	5.5	0.820312	1.23936	no	NA	miR172d-5p:AT4G20320.2	0.822104
AT3G52230.1	miR414	512	4	0.440848	0.170632	no	NA	miR414:AT3G52230.1	0.829748
AT1G65920.1	miR847	263	5.5	0.234375	1.23438	no	NA	miR847:AT1G65920.1	0.837485
AT2G46330.2	miR156i	540	4	0.284598	0.672706	no	AGP16	miR156i:AGP16	0.837485
AT3G56190.2	miR5663-5p	872	4.5	0.892857	0.650806	no	ALPHA-SNAP2	miR5663-5p:ALPHA-SNAP2	0.837485
AT3G63440.1	miR156a-3p	1272	5.5	0.256696	1.2567	no	ATCKX6	miR156a-3p:ATCKX6	0.837485
AT4G14300.1	miR160a-3p	1146	5.5	1.14397	1.09086	no	NA	miR160a-3p:AT4G14300.1	0.837485
AT4G14930.1	miR859	1199	5	0.920759	1.00291	no	NA	miR859:AT4G14930.1	0.837485
AT1G65580.1	miR5021	183	4	0.00558036	0.923156	no	FRA3	miR5021:FRA3	0.848479
AT5G62680.1	miR158a-5p	2178	4.5	0.234375	0.594304	no	GTR2	miR158a-5p:GTR2	0.848479
AT1G30530.1	miR773b-3p	1144	4.5	0.507812	0.585863	no	UGT78D1	miR773b-3p:UGT78D1	0.850513
AT5G47050.1	miR5021	259	3.5	0.329241	0.655836	no	NA	miR5021:AT5G47050.1	0.85348
AT1G65370.1	miR5655	1157	4	0.446429	1.18248	no	NA	miR5655:AT1G65370.1	0.861124
AT1G14670.1	miR5658	1537	4	0.295759	0.386228	no	NA	miR5658:AT1G14670.1	0.877967
AT2G35940.3	miR773b-5p	2560	4	0.145089	0.574468	no	BLH1	miR773b-5p:BLH1	0.877967
AT4G32260.1	miR5021	895	3	0.61942	0.317089	no	PDE334	miR5021:PDE334	0.877967
AT4G31480.2	miR4228-5p	3241	4.5	0.647321	0.540461	no	NA	miR4228-5p:AT4G31480.2	0.894494
AT1G22920.2	miR5662	870	5.5	1.35603	1.12228	no	AJH1	miR5662:AJH1	0.897262
AT3G27830.1	miR418	201	4	0.898438	0.206532	no	RPL12	miR418:RPL12	0.897262
AT3G50550.2	miR414	93	4.5	0.100446	0.581368	no	NA	miR414:AT3G50550.2	0.897262
AT5G06150.1	miR829-5p	1048	5	1.26116	0.918405	no	CYC1BAT	miR829-5p:CYC1BAT	0.897262
AT1G76810.1	miR158a-5p	4352	5	0.764509	1.28432	no	NA	miR158a-5p:AT1G76810.1	0.901219
AT2G23130.2	miR168a-5p	548	5	0.764509	1.26886	no	AGP17	miR168a-5p:AGP17	0.901219
AT3G05410.2	miR5651	546	6	0.792411	1.79241	no	NA	miR5651:AT3G05410.2	0.901219
AT3G14560.1	miR824-5p	294	4.5	0.245536	0.929226	no	NA	miR824-5p:AT3G14560.1	0.901219
AT3G55605.1	miR414	472	5.5	0.507812	1.50781	no	NA	miR414:AT3G55605.1	0.901219
AT1G32870.2	miR414	499	6	0.3125	1.3125	no	ANAC013	miR414:ANAC013	0.906046
AT1G64570.1	miR5996	1057	5.5	0.234375	1.23438	no	DUO3	miR5996:DUO3	0.906046
AT3G56020.1	miR831-3p	71	6	13.2757	1.36715	no	NA	miR831-3p:AT3G56020.1	0.906046
AT5G54580.1	miR829-5p	209	6	0.368304	1.3683	no	NA	miR829-5p:AT5G54580.1	0.906046
AT1G02500.2	miR858b	966	5	1.64621	0.840483	no	AtSAM1	miR858b:AtSAM1	0.906145
AT5G43760.1	miR8180	1055	4.5	0.970982	0.545735	no	KCS20	miR8180:KCS20	0.908081
AT1G03475.1	miR5021	262	5	0.742188	1.45752	no	ATCPO-I	miR5021:ATCPO-I	0.913325
AT1G35310.1	miR414	288	4.5	0.502232	0.498334	no	MLP168	miR414:MLP168	0.926016
AT1G19920.1	miR835-5p	1453	4.5	0.200893	0.382102	no	APS2	miR835-5p:APS2	0.927942
AT3G47690.1	miR831-3p	679	6	0.329241	1.32924	no	AtEB1a	miR831-3p:AtEB1a	0.927942
AT4G27310.1	miR414	582	5	0.245536	0.829124	no	BBX28	miR414:BBX28	0.927942
AT5G48600.2	miR866-5p	600	5.5	1.41741	1.14543	no	ATCAP-C	miR866-5p:ATCAP-C	0.927942
ATCG01280.1	miR5012	3828	5	0.239955	0.850689	no	YCF2.2	miR5012:YCF2.2	0.927942
AT3G58220.2	miR837-5p	1224	5.5	0.435268	1.09354	no	NA	miR837-5p:AT3G58220.2	0.928458
AT2G34560.2	miR5021	40	4	0.440848	0.754529	no	AtCCP1	miR5021:AtCCP1	0.928942
AT3G27060.1	miR5020b	632	4.5	0.368304	0.680735	no	ATTSO2	miR5020b:ATTSO2	0.928942
AT1G45230.2	miR838	1001	5	0.217634	1.21763	no	NA	miR838:AT1G45230.2	0.938195
AT1G23240.3	miR5021	569	3.5	0.78125	0.432403	no	NA	miR5021:AT1G23240.3	0.941026
AT1G29930.1	miR842	223	4.5	4.87165	0.347008	no	AB140	miR842:AB140	0.941026
AT1G52342.1	miR5021	304	4	0.507812	0.722073	no	NA	miR5021:AT1G52342.1	0.941026
AT3G54540.1	miR838	2156	5.5	1.40625	1.03356	no	ABCF4	miR838:ABCF4	0.941026
AT5G58130.1	miR829-5p	2363	5.5	0.0837054	1.08371	no	ROS3	miR829-5p:ROS3	0.941026
AT1G20696.3	miR414	569	4.5	0.965402	0.656844	no	HMGB3	miR414:HMGB3	0.943706
AT1G47970.1	miR414	206	5	0.479911	1.05995	no	NA	miR414:AT1G47970.1	0.943706
AT1G52160.1	miR5021	153	5	0.334821	1.33482	no	TRZ3	miR5021:TRZ3	0.943706
AT1G53910.3	miR156i	1315	6	1.04911	1.49755	no	RAP2.12	miR156i:RAP2.12	0.943706
AT1G67880.1	miR157a-3p	1063	5.5	0.373884	1.37388	no	NA	miR157a-3p:AT1G67880.1	0.943706
AT3G01330.1	miR162a-3p	1076	5	0.111607	1.11161	no	DEL3	miR162a-3p:DEL3	0.943706
AT3G08520.1	miR831-3p	29	6	6.37277	1.6573	no	NA	miR831-3p:AT3G08520.1	0.943706
AT3G18820.1	miR472-3p	252	5.5	0.703125	1.20537	no	ATRAB7B	miR472-3p:ATRAB7B	0.943706
AT3G29075.1	miR842	423	5	0.831473	0.982047	no	NA	miR842:AT3G29075.1	0.943706
AT3G53630.1	miR838	560	4.5	0.0111607	0.548758	no	NA	miR838:AT3G53630.1	0.943706
AT5G04810.1	miR156b-3p	776	6	0.563616	1.53787	no	NA	miR156b-3p:AT5G04810.1	0.943706
AT5G23940.1	miR3440b-3p	713	4.5	0.546875	0.667631	no	DCR	miR3440b-3p:DCR	0.943706
AT5G50920.1	miR173-3p	1539	5	0.669643	1.02747	no	ATHSP93-V	miR173-3p:ATHSP93-V	0.943706
AT1G27400.1	miR773a	591	5	3.45982	0.740548	no	NA	miR773a:AT1G27400.1	0.944318
AT5G11670.1	miR156j	2112	5	0.563616	0.883354	no	ATNADP-ME2	miR156j:ATNADP-ME2	0.948526
AT1G07920.1	miR414	1280	4.5	0.982143	0.334086	no	NA	miR414:AT1G07920.1	0.954098
AT1G70700.2	miR5021	98	4	0.558036	0.666029	no	JAZ9	miR5021:JAZ9	0.954098
AT5G48580.1	miR5021	504	4	0.212054	0.67203	no	FKBP15-2	miR5021:FKBP15-2	0.954098
AT1G07930.2	miR414	1061	4.5	1.1942	0.31552	no	NA	miR414:AT1G07930.2	0.955808
AT1G18490.1	miR160c-3p	1219	6	0.78683	1.20285	no	NA	miR160c-3p:AT1G18490.1	0.955808
AT4G02450.2	miR414	735	4.5	1.2779	0.267988	no	NA	miR414:AT4G02450.2	0.955808
AT4G17040.1	miR5021	177	5	0.636161	0.939141	no	CLPR4	miR5021:CLPR4	0.955808
AT5G22080.2	miR158a-5p	762	5	0.546875	0.664431	no	NA	miR158a-5p:AT5G22080.2	0.955808
AT5G42310.1	miR1886.2	2231	6	0.870536	1.16308	no	NA	miR1886.2:AT5G42310.1	0.955808
AT1G72320.3	miR158a-3p	2021	5.5	0.228795	1.2288	no	APUM23	miR158a-3p:APUM23	0.961889
AT2G04390.1	miR847	328	5	0.0111607	0.905094	no	NA	miR847:AT2G04390.1	0.961889
AT3G16640.1	miR414	276	4.5	0.558036	0.436797	no	TCTP	miR414:TCTP	0.961889
ATCG00860.1	miR5012	3828	5	0.669643	0.96144	no	YCF2.1	miR5012:YCF2.1	0.961889
AT5G15580.1	miR5021	266	4	0.00558036	0.62963	no	LNG1	miR5021:LNG1	0.962435
AT1G07940.2	miR414	1411	4.5	0.853795	0.219971	no	NA	miR414:AT1G07940.2	0.962995
AT2G32920.1	miR832-5p	123	5	0.351562	0.699595	no	ATPDI9	miR832-5p:ATPDI9	0.962995
AT3G13300.2	miR5634	2761	5	0.418527	0.668596	no	VCS	miR5634:VCS	0.962995
AT1G36370.1	miR2934-5p	1720	6	0.373884	1.37388	no	SHM7	miR2934-5p:SHM7	0.965431
AT5G11090.1	miR5021	77	6	0.396205	1.3962	no	NA	miR5021:AT5G11090.1	0.965431
AT2G22230.1	miR3434-3p	667	6	2.55022	1.10605	no	NA	miR3434-3p:AT2G22230.1	0.965954
AT1G21640.2	miR865-3p	1637	6	0.418527	1.41853	no	ATNADK2	miR865-3p:ATNADK2	0.970898
AT1G72120.1	miR844-5p	1521	6	0.368304	1.3683	no	NA	miR844-5p:AT1G72120.1	0.970898
AT3G02360.2	miR859	1605	5	1.23326	0.871516	no	NA	miR859:AT3G02360.2	0.970898
AT3G06580.1	miR397a	1212	6	0.329241	1.32924	no	GAL1	miR397a:GAL1	0.970898
AT3G45090.2	miR858a	2074	6	0.373884	1.37388	no	NA	miR858a:AT3G45090.2	0.970898
AT5G03660.2	miR840-3p	491	5.5	1.5346	1.12929	no	NA	miR840-3p:AT5G03660.2	0.970898
AT1G31580.1	miR5021	173	4	0.373884	0.723692	no	CXC750	miR5021:CXC750	0.974659
AT1G32990.1	miR5021	82	6	0.926339	1.31655	no	PRPL11	miR5021:PRPL11	0.974659
AT1G64090.2	miR5021	412	5	1.02679	1.0552	no	RTNLB3	miR5021:RTNLB3	0.974659
AT3G27360.1	miR856	370	5.5	1.31696	1.10074	no	NA	miR856:AT3G27360.1	0.974659
AT1G51100.1	miR833b	636	5.5	0.993304	1.08836	no	CRR41	miR833b:CRR41	0.980014
AT4G10710.1	miR414	3172	5	0.429688	0.727428	no	SPT16	miR414:SPT16	0.980014
AT2G35040.2	miR5998a	1945	5	0.256696	0.70112	no	NA	miR5998a:AT2G35040.2	0.981058
AT3G11120.1	miR831-3p	105	5	2.52232	0.562968	no	NA	miR831-3p:AT3G11120.1	0.981058
AT3G50240.1	miR414	3210	6	0.122768	1.12277	no	KICP-02	miR414:KICP-02	0.984034
AT1G20090.1	miR5021	124	4	0.435268	0.562555	no	ARAC4	miR5021:ARAC4	0.986623
AT1G69530.5	miR162a-3p	941	6	5.47991	1.11311	no	AT-EXP1	miR162a-3p:AT-EXP1	0.986623
AT1G71970.1	miR8176	398	6	0.541295	1.02221	no	NA	miR8176:AT1G71970.1	0.986623
AT1G80040.3	miR5021	142	4	0.00558036	0.562773	no	NA	miR5021:AT1G80040.3	0.986623
AT3G25545.1	miR840-5p	811	5	0.580357	0.754797	no	NA	miR840-5p:AT3G25545.1	0.986623
AT3G21200.1	miR157a-5p	98	6	0.708705	1.06246	no	GluTRBP	miR157a-5p:GluTRBP	0.987074
AT1G05260.1	miR2933a	941	6	0.362723	1.1673	no	RCI3	miR2933a:RCI3	0.99029
AT2G47450.1	miR5021	194	4	0.340402	0.549406	no	CAO	miR5021:CAO	0.99029
AT3G05220.2	miR847	1234	6	4.22433	1.05404	no	NA	miR847:AT3G05220.2	0.99029
AT3G56260.2	miR831-3p	768	5	0.379464	0.460163	no	NA	miR831-3p:AT3G56260.2	0.99029
AT4G00200.1	miR854a	1052	5	0.0223214	0.715066	no	NA	miR854a:AT4G00200.1	0.99029
AT4G38740.1	miR776	534	6	4.78237	1.10328	no	ROC1	miR776:ROC1	0.99029
AT5G38060.2	miR1886.1	119	6	0.552455	1.1254	no	NA	miR1886.1:AT5G38060.2	0.99029
AT5G62690.1	miR774a	179	5	0.993304	0.594145	no	TUB2	miR774a:TUB2	0.99029
AT3G62610.1	miR780.2	992	5.5	0.664062	0.8233	no	ATMYB11	miR780.2:ATMYB11	0.991248
AT1G01610.1	miR854a	274	5.5	0.78683	0.778697	no	ATGPAT4	miR854a:ATGPAT4	0.99999
AT1G01630.1	miR8171	978	6	1.47321	0.511069	no	NA	miR8171:AT1G01630.1	0.99999
AT1G01800.2	miR171c-5p	925	5.5	0.479911	0.356835	no	NA	miR171c-5p:AT1G01800.2	0.99999
AT1G02090.3	miR838	725	6	1.02121	0.602463	no	ATCSN7	miR838:ATCSN7	0.99999
AT1G02205.3	miR774b-3p	1614	6	0.998884	0.247342	no	CER1	miR774b-3p:CER1	0.99999
AT1G02280.2	miR5650	645	6	0.301339	0.924663	no	ATTOC33	miR5650:ATTOC33	0.99999
AT1G04340.1	miR172d-5p	483	6	0.30692	0.606423	no	NA	miR172d-5p:AT1G04340.1	0.99999
AT1G07360.1	miR829-5p	510	6	0.3125	1.05851	no	MAC5A	miR829-5p:MAC5A	0.99999
AT1G07920.1	miR861-5p	491	6	1.75781	0.804622	no	NA	miR861-5p:AT1G07920.1	0.99999
AT1G07930.2	miR861-5p	503	6	0.122768	0.540569	no	NA	miR861-5p:AT1G07930.2	0.99999
AT1G07940.2	miR861-5p	622	6	0.122768	0.426996	no	NA	miR861-5p:AT1G07940.2	0.99999
AT1G10950.1	miR5024-5p	1797	5.5	0.418527	0.383872	no	AtTMN1	miR5024-5p:AtTMN1	0.99999
AT1G12810.2	miR5640	395	6	0.251116	0.521153	no	NA	miR5640:AT1G12810.2	0.99999
AT1G15500.1	miR172e-3p	1904	6	0.362723	0.367108	no	ATNTT2	miR172e-3p:ATNTT2	0.99999
AT1G17745.2	miR839-5p	1917	6	0.870536	0.533588	no	PGDH	miR839-5p:PGDH	0.99999
AT1G19570.2	miR842	467	5	0.239955	0.196429	no	ATDHAR1	miR842:ATDHAR1	0.99999
AT1G19580.2	miR5642a	1122	5.5	0.47433	0.795304	no	GAMMA CA1	miR5642a:GAMMA CA1	0.99999
AT1G20693.3	miR414	583	5.5	1.11049	0.572857	no	HMG BETA 1	miR414:HMG BETA 1	0.99999
AT1G24260.3	miR398a-5p	743	6	1.12165	0.420482	no	AGL9	miR398a-5p:AGL9	0.99999
AT1G24260.3	miR5658	794	6	0.697545	0.144706	no	AGL9	miR5658:AGL9	0.99999
AT1G28440.1	miR4243	2719	6	1.13839	0.732416	no	HSL1	miR4243:HSL1	0.99999
AT1G29900.1	miR390a-5p	3315	5.5	0.535714	0.534161	no	CARB	miR390a-5p:CARB	0.99999
AT1G33990.1	miR397b	1133	5.5	0.418527	0.548791	no	ATMES14	miR397b:ATMES14	0.99999
AT1G35620.1	miR157c-3p	1137	5.5	0.625	0.485172	no	ATPDI8	miR157c-3p:ATPDI8	0.99999
AT1G36310.2	miR831-3p	990	5	0.636161	0.115789	no	NA	miR831-3p:AT1G36310.2	0.99999
AT1G45688.2	miR1886.1	740	6	0.245536	0.560522	no	NA	miR1886.1:AT1G45688.2	0.99999
AT1G50490.1	miR159b-5p	640	6	0.145089	0.0135578	no	UBC20	miR159b-5p:UBC20	0.99999
AT1G52300.1	miR778	330	6	0.820312	0.0526622	no	NA	miR778:AT1G52300.1	0.99999
AT1G52600.1	miR868-5p	592	5.5	0.452009	0.14551	no	NA	miR868-5p:AT1G52600.1	0.99999
AT1G54030.1	miR4240	690	5.5	0.31808	0.507739	no	ERMO3	miR4240:ERMO3	0.99999
AT1G55670.1	miR157d	654	5.5	0.31808	0.120621	no	PSAG	miR157d:PSAG	0.99999
AT1G55805.1	miR858a	313	6	0.295759	0.467957	no	NA	miR858a:AT1G55805.1	0.99999
AT1G56300.1	miR419	310	5.5	0.301339	0.649222	no	NA	miR419:AT1G56300.1	0.99999
AT1G60950.1	miR773b-3p	423	5.5	3.66629	0.182768	no	ATFD2	miR773b-3p:ATFD2	0.99999
AT1G64950.1	miR157c-3p	1253	5.5	0.764509	0.151568	no	CYP89A5	miR157c-3p:CYP89A5	0.99999
AT1G65295.1	miR854a	115	5	0.385045	0.141328	no	NA	miR854a:AT1G65295.1	0.99999
AT1G66580.1	miR158a-5p	795	5	0.429688	0.282097	no	RPL10C	miR158a-5p:RPL10C	0.99999
AT1G67050.1	miR5021	724	6	0.46875	0.376969	no	NA	miR5021:AT1G67050.1	0.99999
AT1G67080.1	miR774b-5p	213	6	0.418527	0.56214	no	ABA4	miR774b-5p:ABA4	0.99999
AT1G69830.1	miR5012	1922	6	0.217634	0.341365	no	AMY3	miR5012:AMY3	0.99999
AT1G70580.4	miR413	1235	5.5	0.546875	0.750812	no	AOAT2	miR413:AOAT2	0.99999
AT1G72020.1	miR5651	278	6	2.67299	0.170863	no	NA	miR5651:AT1G72020.1	0.99999
AT1G75040.1	miR166a-5p	791	5.5	0.552455	0.639247	no	PR-5	miR166a-5p:PR-5	0.99999
AT1G75930.1	miR5021	178	4	0.256696	0.196991	no	EXL6	miR5021:EXL6	0.99999
AT1G76160.1	miR4221	377	5.5	0.234375	0.621	no	sks5	miR4221:sks5	0.99999
AT1G78040.2	miR415	511	4.5	0.535714	0.127395	no	NA	miR415:AT1G78040.2	0.99999
AT2G01720.1	miR403-3p	849	6	0.351562	0.473787	no	NA	miR403-3p:AT2G01720.1	0.99999
AT2G04030.2	miR156d-3p	1007	6	0.78683	0.675241	no	AtHsp90.5	miR156d-3p:AtHsp90.5	0.99999
AT2G04030.2	miR831-5p	1986	6	0.424107	0.446779	no	AtHsp90.5	miR831-5p:AtHsp90.5	0.99999
AT2G04570.1	miR1888b	104	6	1.8471	0.880871	no	NA	miR1888b:AT2G04570.1	0.99999
AT2G04570.1	miR774b-3p	984	6	0.368304	0.132383	no	NA	miR774b-3p:AT2G04570.1	0.99999
AT2G05220.2	miR847	336	5	1.44531	0.0702108	no	NA	miR847:AT2G05220.2	0.99999
AT2G14878.1	miR5655	646	6	0.507812	0.575874	no	NA	miR5655:AT2G14878.1	0.99999
AT2G16440.1	miR5015	2464	6	0.373884	0.734487	no	MCM4	miR5015:MCM4	0.99999
AT2G16600.2	miR773b-5p	405	5	0.9375	0.176315	no	ROC3	miR773b-5p:ROC3	0.99999
AT2G16600.2	miR414	538	5.5	1.42857	0.0981685	no	ROC3	miR414:ROC3	0.99999
AT2G17420.1	miR414	817	6	0.518973	0.715939	no	ATNTRA	miR414:ATNTRA	0.99999
AT2G20260.1	miR5631	141	5.5	0.63058	0.311447	no	PSAE-2	miR5631:PSAE-2	0.99999
AT2G20260.1	miR834	241	6	0.267857	0.254652	no	PSAE-2	miR834:PSAE-2	0.99999
AT2G20890.1	miR838	906	5.5	0.396205	0.192284	no	PSB29	miR838:PSB29	0.99999
AT2G21390.1	miR777	3030	6	0.747768	0.493073	no	NA	miR777:AT2G21390.1	0.99999
AT2G23350.1	miR156c-3p	1924	6	1.07143	0.794522	no	PAB4	miR156c-3p:PAB4	0.99999
AT2G27020.1	miR773b-3p	231	6	0.507812	0.616614	no	PAG1	miR773b-3p:PAG1	0.99999
AT2G27980.1	miR773a	3423	6	0.892857	0.365832	no	NA	miR773a:AT2G27980.1	0.99999
AT2G30010.1	miR156g	1152	6	0.982143	0.671203	no	TBL45	miR156g:TBL45	0.99999
AT2G30432.1	miR158a-5p	486	5.5	0.3125	0.365671	no	TCL1	miR158a-5p:TCL1	0.99999
AT2G30695.2	miR5998a	584	6	0.93192	0.846042	no	NA	miR5998a:AT2G30695.2	0.99999
AT2G32060.3	miR5666	435	5.5	1.17188	0.139089	no	NA	miR5666:AT2G32060.3	0.99999
AT2G32235.1	miR5021	412	5	0.239955	0.636311	no	NA	miR5021:AT2G32235.1	0.99999
AT2G32240.1	miR5021	4034	5	0.239955	0.636311	no	NA	miR5021:AT2G32240.1	0.99999
AT2G34870.1	miR390a-5p	332	6	0.853795	0.815816	no	MEE26	miR390a-5p:MEE26	0.99999
AT2G35490.1	miR865-3p	476	6	0.379464	0.520201	no	NA	miR865-3p:AT2G35490.1	0.99999
AT2G37270.2	miR8166	403	6	0.636161	0.490137	no	ATRPS5B	miR8166:ATRPS5B	0.99999
AT2G38170.3	miR5636	1179	6	0.351562	0.316933	no	ATCAX1	miR5636:ATCAX1	0.99999
AT2G40360.1	miR414	377	6	0.329241	0.657646	no	NA	miR414:AT2G40360.1	0.99999
AT2G41680.1	miR854a	114	6	0.491071	0.767375	no	NTRC	miR854a:NTRC	0.99999
AT2G42530.1	miR5019	119	6	0.200893	0.539078	no	COR15B	miR5019:COR15B	0.99999
AT2G44060.2	miR414	1037	5.5	0.982143	0.493882	no	NA	miR414:AT2G44060.2	0.99999
AT2G47110.2	miR838	303	6	0.273438	0.293618	no	UBI6	miR838:UBI6	0.99999
AT3G01390.2	miR4221	411	6	1.23884	0.531954	no	AVMA10	miR4221:AVMA10	0.99999
AT3G01530.1	miR5654-3p	973	6	0.133929	0.707521	no	ATMYB57	miR5654-3p:ATMYB57	0.99999
AT3G02080.1	miR5021	569	5.5	0.217634	0.191538	no	NA	miR5021:AT3G02080.1	0.99999
AT3G02468.1	miR854a	813	5	0.675223	0.393344	no	CPuORF9	miR854a:CPuORF9	0.99999
AT3G02470.4	miR854a	866	5	0.675223	0.393344	no	SAMDC	miR854a:SAMDC	0.99999
AT3G02930.2	miR408-3p	569	6	0.262277	0.513858	no	NA	miR408-3p:AT3G02930.2	0.99999
AT3G07410.1	miR158a-5p	557	6	0.429688	0.654907	no	AtRABA5b	miR158a-5p:AtRABA5b	0.99999
AT3G07560.1	miR5021	1233	6	0.00558036	0.0453767	no	APM2	miR5021:APM2	0.99999
AT3G08680.2	miR5021	359	6	1.33371	0.492464	no	NA	miR5021:AT3G08680.2	0.99999
AT3G10960.1	miR8170-5p	2100	6	0.234375	0.480661	no	ATAZG1	miR8170-5p:ATAZG1	0.99999
AT3G14200.1	miR4221	879	5.5	0.234375	0.399134	no	NA	miR4221:AT3G14200.1	0.99999
AT3G14310.1	miR869.2	1295	5.5	0.675223	0.463128	no	ATPME3	miR869.2:ATPME3	0.99999
AT3G15020.2	miR827	680	5.5	0.16183	0.379789	no	mMDH2	miR827:mMDH2	0.99999
AT3G17160.1	miR847	291	6	0.145089	0.212378	no	NA	miR847:AT3G17160.1	0.99999
AT3G17780.1	miR8180	423	6	0.965402	0.665534	no	NA	miR8180:AT3G17780.1	0.99999
AT3G17820.1	miR851-5p	1014	5	1.08259	0.0733751	no	ATGSKB6	miR851-5p:ATGSKB6	0.99999
AT3G18035.1	miR834	910	5.5	0.407366	0.763779	no	HON4	miR834:HON4	0.99999
AT3G18850.5	miR5662	1004	6	0.496652	0.439529	no	LPAT5	miR5662:LPAT5	0.99999
AT3G23810.1	miR5021	1697	4	0.418527	0.14105	no	ATSAHH2	miR5021:ATSAHH2	0.99999
AT3G23810.1	miR408-5p	709	5	0.284598	0.366444	no	ATSAHH2	miR408-5p:ATSAHH2	0.99999
AT3G25500.1	miR5021	3261	5.5	0.00558036	0.398496	no	AFH1	miR5021:AFH1	0.99999
AT3G27810.1	miR858a	499	5	0.31808	0.263851	no	ATMYB21	miR858a:ATMYB21	0.99999
AT3G28980.1	miR773a	1123	5	0.345982	0.467261	no	NA	miR773a:AT3G28980.1	0.99999
AT3G29200.1	miR833a-5p	1182	6	0.273438	0.275538	no	ATCM1	miR833a-5p:ATCM1	0.99999
AT3G42170.1	miR870-5p	2043	5.5	0.742188	0.614325	no	DAYSLEEPER	miR870-5p:DAYSLEEPER	0.99999
AT3G48930.1	miR5020c	437	6	0.753348	0.0915448	no	EMB1080	miR5020c:EMB1080	0.99999
AT3G50820.1	miR782	1083	6	0.563616	0.0936437	no	OEC33	miR782:OEC33	0.99999
AT3G51300.1	miR414	350	6	0.223214	0.776754	no	ARAC11	miR414:ARAC11	0.99999
AT3G52590.1	miR5024-3p	122	6	1.45647	0.256497	no	EMB2167	miR5024-3p:EMB2167	0.99999
AT3G53420.2	miR5638b	946	6	0.290179	0.107425	no	AtPIP2;1	miR5638b:AtPIP2;1	0.99999
AT3G53470.2	miR169g-3p	412	6	0.234375	0.415633	no	NA	miR169g-3p:AT3G53470.2	0.99999
AT3G53580.1	miR858a	993	5.5	1.36161	0.496016	no	NA	miR858a:AT3G53580.1	0.99999
AT3G55330.1	miR839-5p	702	6	1.72991	0.0113148	no	PPL1	miR839-5p:PPL1	0.99999
AT3G55460.1	miR834	740	6	0.323661	0.471383	no	At-SCL30	miR834:At-SCL30	0.99999
AT3G56370.1	miR159b-5p	3080	6	1.5904	0.469743	no	NA	miR159b-5p:AT3G56370.1	0.99999
AT3G57520.3	miR396b-5p	474	6	0.15625	0.892334	no	AtSIP2	miR396b-5p:AtSIP2	0.99999
AT3G58110.2	miR414	979	5.5	0.133929	0.613527	no	NA	miR414:AT3G58110.2	0.99999
AT3G60750.2	miR5663-5p	304	5.5	0.479911	0.509804	no	NA	miR5663-5p:AT3G60750.2	0.99999
AT3G61580.1	miR5021	1144	6	0.859375	0.562647	no	AtSLD1	miR5021:AtSLD1	0.99999
AT3G62250.1	miR838	281	6	1.28906	0.305845	no	UBQ5	miR838:UBQ5	0.99999
AT4G01150.2	miR3440b-3p	252	5.5	1.6183	0.486116	no	NA	miR3440b-3p:AT4G01150.2	0.99999
AT4G01290.2	miR4221	3405	5.5	0.267857	0.577822	no	NA	miR4221:AT4G01290.2	0.99999
AT4G02530.1	miR870-3p	96	5.5	0.284598	0.329233	no	NA	miR870-3p:AT4G02530.1	0.99999
AT4G04640.1	miR5021	1310	6	1.8471	0.594501	no	ATPC1	miR5021:ATPC1	0.99999
AT4G06634.3	miR414	1250	6	0.0111607	0.557196	no	AtYY1	miR414:AtYY1	0.99999
AT4G07990.2	miR835-3p	1274	5	0.686384	0.583173	no	NA	miR835-3p:AT4G07990.2	0.99999
AT4G09350.1	miR5628	697	6	1.13281	0.669117	no	CRRJ	miR5628:CRRJ	0.99999
AT4G09800.1	miR5021	69	6	1.35045	0.772562	no	RPS18C	miR5021:RPS18C	0.99999
AT4G10480.2	miR414	216	5	0.452009	0.278527	no	NA	miR414:AT4G10480.2	0.99999
AT4G13615.1	miR774b-5p	14	5.5	1.47879	0.403744	no	NA	miR774b-5p:AT4G13615.1	0.99999
AT4G14220.1	miR5021	207	6	0.00558036	0.424799	no	RHF1A	miR5021:RHF1A	0.99999
AT4G15080.1	miR780.1	2604	6	0.993304	0.817018	no	NA	miR780.1:AT4G15080.1	0.99999
AT4G15790.1	miR5662	242	6	0.412946	0.481186	no	NA	miR5662:AT4G15790.1	0.99999
AT4G16155.1	miR158a-5p	1815	5.5	0.106027	0.404325	no	NA	miR158a-5p:AT4G16155.1	0.99999
AT4G16720.1	miR5644	520	5.5	1.56808	0.19573	no	NA	miR5644:AT4G16720.1	0.99999
AT4G18030.1	miR166e-5p	2047	6	0.122768	0.188178	no	NA	miR166e-5p:AT4G18030.1	0.99999
AT4G18270.1	miR5018	1161	5.5	0.200893	0.846577	no	ATTRANS11	miR5018:ATTRANS11	0.99999
AT4G19110.3	miR5632-5p	1174	6	0.30692	0.411455	no	NA	miR5632-5p:AT4G19110.3	0.99999
AT4G19112.1	miR5632-5p	2258	6	0.30692	0.411455	no	CPuORF25	miR5632-5p:CPuORF25	0.99999
AT4G20440.4	miR5633	960	6	0.636161	0.578075	no	smB	miR5633:smB	0.99999
AT4G20480.1	miR5012	596	5.5	0.675223	0.569424	no	NA	miR5012:AT4G20480.1	0.99999
AT4G21520.1	miR414	1192	5.5	0.128348	0.486995	no	NA	miR414:AT4G21520.1	0.99999
AT4G21660.2	miR847	1356	6	0.0446429	0.478527	no	NA	miR847:AT4G21660.2	0.99999
AT4G22220.1	miR172b-5p	545	5	0.658482	0.277446	no	ATISU1	miR172b-5p:ATISU1	0.99999
AT4G23630.1	miR5021	723	6	0.0334821	0.443913	no	BTI1	miR5021:BTI1	0.99999
AT4G24770.1	miR854a	1111	5.5	0.440848	0.451241	no	ATRBP31	miR854a:ATRBP31	0.99999
AT4G26230.1	miR414	332	5	2.46094	0.254681	no	NA	miR414:AT4G26230.1	0.99999
AT4G28300.2	miR156a-3p	1915	6	0.457589	0.743736	no	NA	miR156a-3p:AT4G28300.2	0.99999
AT4G28780.1	miR829-5p	831	6	0.385045	0.74714	no	NA	miR829-5p:AT4G28780.1	0.99999
AT4G29030.1	miR841b-5p	609	6	0.680804	0.378773	no	NA	miR841b-5p:AT4G29030.1	0.99999
AT4G30660.2	miR2111b-3p	224	6	2.82924	0.499345	no	NA	miR2111b-3p:AT4G30660.2	0.99999
AT4G31330.1	miR5021	450	6	0.223214	0.455527	no	NA	miR5021:AT4G31330.1	0.99999
AT4G32250.3	miR396a-5p	1759	5	0.602679	0.331563	no	NA	miR396a-5p:AT4G32250.3	0.99999
AT4G32285.2	miR3440b-3p	2005	6	0.245536	0.408642	no	NA	miR3440b-3p:AT4G32285.2	0.99999
AT4G34588.1	miR5021	107	6	2.29353	0.855116	no	CPuORF2	miR5021:CPuORF2	0.99999
AT4G34590.1	miR5021	107	6	2.29353	0.855116	no	ATB2	miR5021:ATB2	0.99999
AT4G36790.1	miR415	1559	6	0.100446	0.852941	no	NA	miR415:AT4G36790.1	0.99999
AT4G38600.2	miR408-3p	1900	5.5	0.345982	0.585154	no	KAK	miR408-3p:KAK	0.99999
AT4G38920.1	miR156a-5p	404	5	0.574777	0.426156	no	ATVHA-C3	miR156a-5p:ATVHA-C3	0.99999
AT4G39840.1	miR5021	677	5	0.396205	0.410703	no	NA	miR5021:AT4G39840.1	0.99999
AT5G01530.1	miR5662	896	5.5	12.7511	0.474962	no	LHCB4.1	miR5662:LHCB4.1	0.99999
AT5G03040.3	miR5021	595	6	0.0334821	0.574798	no	iqd2	miR5021:iqd2	0.99999
AT5G07530.2	miR164b-3p	1497	5	0.412946	0.0817511	no	ATGRP-7	miR164b-3p:ATGRP-7	0.99999
AT5G09900.3	miR172a	649	5.5	0.167411	0.703903	no	EMB2107	miR172a:EMB2107	0.99999
AT5G12250.1	miR774a	171	6	0.239955	0.658956	no	TUB6	miR774a:TUB6	0.99999
AT5G13140.1	miR3440b-3p	681	6	0.172991	0.502629	no	NA	miR3440b-3p:AT5G13140.1	0.99999
AT5G15780.1	miR5021	503	6	0.965402	0.967049	no	NA	miR5021:AT5G15780.1	0.99999
AT5G17920.2	miR870-5p	816	6	0.195312	0.204545	no	ATCIMS	miR870-5p:ATCIMS	0.99999
AT5G18460.1	miR865-3p	1665	6	1.21094	0.602861	no	NA	miR865-3p:AT5G18460.1	0.99999
AT5G20165.3	miR8172	536	6	0.245536	0.538871	no	NA	miR8172:AT5G20165.3	0.99999
AT5G22480.1	miR831-3p	1555	6	1.91964	0.104427	no	NA	miR831-3p:AT5G22480.1	0.99999
AT5G23740.1	miR399f	552	6	1.50112	0.208641	no	RPS11-BETA	miR399f:RPS11-BETA	0.99999
AT5G24520.3	miR5645c	1250	5	0.206473	0.441045	no	ATTTG1	miR5645c:ATTTG1	0.99999
AT5G27700.1	miR417	258	5.5	0.569196	0.20842	no	NA	miR417:AT5G27700.1	0.99999
AT5G30495.2	miR838	616	5.5	0.00558036	0.580915	no	NA	miR838:AT5G30495.2	0.99999
AT5G30510.1	miR167a-5p	616	6	0.697545	0.454572	no	ARRPS1	miR167a-5p:ARRPS1	0.99999
AT5G33320.1	miR394b-3p	556	6	0.390625	0.554763	no	ARAPPT	miR394b-3p:ARAPPT	0.99999
AT5G33370.2	miR5663-3p	133	5.5	0.139509	0.198987	no	NA	miR5663-3p:AT5G33370.2	0.99999
AT5G36700.4	miR1886.1	127	5.5	0.234375	0.116963	no	ATPGLP1	miR1886.1:ATPGLP1	0.99999
AT5G40580.3	miR5015	315	5.5	0.145089	0.623329	no	PBB2	miR5015:PBB2	0.99999
AT5G40950.1	miR841a-3p	261	5.5	1.17746	0.351469	no	RPL27	miR841a-3p:RPL27	0.99999
AT5G45680.1	miR169d	472	6	0.714286	0.598597	no	ATFKBP13	miR169d:ATFKBP13	0.99999
AT5G47550.1	miR833a-5p	188	6	0.301339	0.582708	no	NA	miR833a-5p:AT5G47550.1	0.99999
AT5G53120.6	miR5640	191	6	0.904018	0.827755	no	ATSPDS3	miR5640:ATSPDS3	0.99999
AT5G57685.1	miR414	435	6	0.0446429	0.296109	no	ATGDU3	miR414:ATGDU3	0.99999
AT5G58250.1	miR4245	718	5	1.04911	0.440711	no	EMB3143	miR4245:EMB3143	0.99999
AT5G58420.1	miR1887	960	6	0.920759	0.289682	no	NA	miR1887:AT5G58420.1	0.99999
AT5G61410.2	miR3434-3p	568	5.5	0.217634	0.332015	no	EMB2728	miR3434-3p:EMB2728	0.99999
AT5G61660.1	miR164c-3p	350	5.5	0.446429	0.552431	no	NA	miR164c-3p:AT5G61660.1	0.99999
AT5G62210.1	miR2112-5p	659	6	3.0692	0.302926	no	NA	miR2112-5p:AT5G62210.1	0.99999
AT5G62700.1	miR774a	138	5	0.234375	0.446689	no	TUB3	miR774a:TUB3	0.99999
AT5G62950.3	miR414	1037	6	0.172991	0.583566	no	NA	miR414:AT5G62950.3	0.99999
AT5G67200.1	miR402	1880	6	0.267857	0.662004	no	NA	miR402:AT5G67200.1	0.99999
ATMG00830.1	miR837-5p	416	6	0.290179	0.920382	no	CCB382	miR837-5p:CCB382	0.99999

## Sheet: Col-0 (+Xrn1) (biorep #2)
Target transcript	miRNA	miRNA slice site position in target transcript	Allen score of sRNA:target duplex	Slice site RPM	Slice site RPM + 1/Maximum adjacent site RPM + 1	Previously verified by 5' RACE?	Target gene common name	Interaction name	P-value adjusted for multiple testing
AT1G77850.1	miR160a-5p	1419	0.5	1.21847	0.947218	yes	ARF17	miR160a-5p:ARF17	0
AT2G27400.1	miR173-5p	378	2.5	2.68417	3.68417	yes	TAS1a	miR173-5p:TAS1a	0
AT2G28350.1	miR160a-5p	1339	2	2.41929	3.41929	yes	ARF10	miR160a-5p:ARF10	0
AT2G39675.1	miR173-5p	378	2.5	5.75684	2.11832	yes	TAS1c	miR173-5p:TAS1c	0
AT2G39681.1	miR173-5p	417	2.5	5.59791	2.16435	yes	TAS2	miR173-5p:TAS2	0
AT2G45160.1	miR171a-3p	1013	0	7.22254	4.1342	yes	ATHAM1	miR171a-3p:ATHAM1	0
AT5G39740.2	miR414	997	1.5	1.55399	0.417243	no	OLI7	miR414:OLI7	0
AT5G23730.1	miR414	1212	2.5	1.80122	1.23323	no	EFO2	miR414:EFO2	0.0930954
AT3G23690.1	miR865-5p	654	4.5	2.70183	3.70183	no	NA	miR865-5p:AT3G23690.1	0.16188
AT4G05390.2	miR773a	1177	3	2.10142	3.10142	no	ATRFNR1	miR773a:ATRFNR1	0.184936
AT2G41900.1	miR5021	54	2	1.4657	2.4657	no	OXS2	miR5021:OXS2	0.29535
AT5G26000.2	miR4227	851	4	8.47633	4.0461	no	AtTGG1	miR4227:AtTGG1	0.29535
AT1G47970.1	miR414	638	3.5	4.52071	2.00882	no	NA	miR414:AT1G47970.1	0.3626
AT5G23270.1	miR414	1745	5	3.51414	4.36015	no	ATSTP11	miR414:ATSTP11	0.3626
AT2G44640.1	miR5666	661	5	2.18972	3.18972	no	NA	miR5666:AT2G44640.1	0.369537
AT3G13200.1	miR414	505	3	1.53633	0.773741	no	EMB2769	miR414:EMB2769	0.369537
AT1G50055.1	miR173-5p	373	4.5	1.99547	2.99547	yes	TAS1b	miR173-5p:TAS1b	0.432467
AT3G51310.1	miR168b-3p	922	6	2.79012	3.79012	no	VPS35C	miR168b-3p:VPS35C	0.432467
AT2G01680.1	miR169g-3p	1323	4	2.50758	1.66038	no	NA	miR169g-3p:AT2G01680.1	0.444279
AT5G35180.4	miR172d-5p	940	4.5	1.57165	2.57165	no	NA	miR172d-5p:AT5G35180.4	0.444279
AT5G46030.1	miR414	453	3	0.141272	0.390201	no	NA	miR414:AT5G46030.1	0.444279
AT3G20770.1	miR5015	1976	3.5	1.51868	0.707383	no	AtEIN3	miR5015:AtEIN3	0.47227
AT3G49010.5	miR5662	83	3.5	4.29114	0.89809	no	ATBBC1	miR5662:ATBBC1	0.477214
AT3G28007.1	miR414	782	3.5	1.05954	0.671713	no	AtSWEET4	miR414:AtSWEET4	0.490464
AT3G29075.1	miR414	867	4.5	1.67761	2.67761	no	NA	miR414:AT3G29075.1	0.490464
AT4G35070.2	miR414	871	4.5	1.67761	2.67761	no	NA	miR414:AT4G35070.2	0.490464
AT5G01810.3	miR5655	1728	3.5	1.27145	1.18411	no	ATPK10	miR5655:ATPK10	0.490464
AT5G44200.2	miR414	905	3.5	0.829974	0.596841	no	ATCBP20	miR414:ATCBP20	0.490464
AT4G18596.1	miR159b-5p	579	4	2.5429	0.727895	no	NA	miR159b-5p:AT4G18596.1	0.532856
AT5G18520.1	miR414	1334	3.5	1.55399	0.456776	no	Cand7	miR414:Cand7	0.532856
AT5G53000.1	miR414	1239	4	2.22504	1.05184	no	TAP46	miR414:TAP46	0.532856
AT5G58870.1	miR396a-5p	1824	6	4.29114	5.29114	no	ftsh9	miR396a-5p:ftsh9	0.535578
AT1G19770.1	miR5658	245	6	2.36631	3.36631	no	ATPUP14	miR5658:ATPUP14	0.536673
AT1G62480.1	miR838	428	4	3.79669	0.985489	no	NA	miR838:AT1G62480.1	0.536673
AT1G18580.1	miR858b	1624	4	1.28911	0.941873	no	GAUT11	miR858b:GAUT11	0.537511
AT1G58848.2	miR5665	1717	4.5	1.05954	2.05954	no	NA	miR5665:AT1G58848.2	0.537511
AT1G59218.2	miR5665	1705	4.5	1.05954	2.05954	no	NA	miR5665:AT1G59218.2	0.537511
AT3G25520.2	miR414	699	3.5	3.12565	0.307962	no	ATL5	miR414:ATL5	0.537511
AT2G36130.1	miR168a-3p	269	5	2.36631	3.36631	no	NA	miR168a-3p:AT2G36130.1	0.549286
AT1G51100.1	miR833b	636	5.5	2.4546	3.4546	no	CRR41	miR833b:CRR41	0.564455
AT3G09200.2	miR5662	663	3.5	1.60697	0.352648	no	NA	miR5662:AT3G09200.2	0.564455
AT1G07320.4	miR414	870	4	6.09236	1.12303	no	EMB2784	miR414:EMB2784	0.572673
AT4G17170.1	miR156a-3p	527	5.5	2.59588	3.59588	no	AT-RAB2	miR156a-3p:AT-RAB2	0.572673
AT2G19480.3	miR414	1181	4	1.55399	0.655528	no	NAP1;2	miR414:NAP1;2	0.573216
AT3G14560.1	miR824-5p	294	4.5	1.67761	0.926666	no	NA	miR824-5p:AT3G14560.1	0.573216
AT3G26030.1	miR5021	58	4	1.43038	2.43038	no	ATB' DELTA	miR5021:ATB' DELTA	0.573216
AT5G15948.1	miR5021	1625	3.5	3.2316	1.2979	no	CPuORF10	miR5021:CPuORF10	0.573216
AT5G15950.2	miR5021	1704	3.5	3.2316	1.2979	no	NA	miR5021:AT5G15950.2	0.573216
AT5G52060.1	miR5022	1452	4	1.96015	1	no	ATBAG1	miR5022:ATBAG1	0.573216
AT1G60810.1	miR162a-5p	715	5.5	2.13674	3.13674	no	ACLA-2	miR162a-5p:ACLA-2	0.587232
AT3G14110.3	miR396b-5p	773	4.5	5.63323	1.34814	no	FLU	miR396b-5p:FLU	0.589891
AT1G08125.3	miR390a-3p	887	5	11.9905	1.92257	no	NA	miR390a-3p:AT1G08125.3	0.618918
AT2G22080.1	miR414	598	4	1.48336	0.517724	no	NA	miR414:AT2G22080.1	0.624469
AT1G54340.1	miR773a	1079	6	2.18972	3.18972	no	ICDH	miR773a:ICDH	0.653482
AT1G09780.1	miR824-3p	1272	4.5	1.3774	2.3774	no	iPGAM1	miR824-3p:iPGAM1	0.677733
AT1G37130.1	miR3434-5p	2652	4.5	2.63119	1.56219	no	ATNR2	miR3434-5p:ATNR2	0.677733
AT1G70780.1	miR172d-5p	414	4	0.918269	0.334623	no	NA	miR172d-5p:AT1G70780.1	0.677733
AT1G70782.1	miR172d-5p	414	4	0.918269	0.334623	no	CPuORF28	miR172d-5p:CPuORF28	0.677733
AT2G18960.1	miR419	2243	5.5	2.10142	3.10142	no	AHA1	miR419:AHA1	0.677733
AT4G04350.1	miR826a	2928	5	1.69527	2.69527	no	EMB2369	miR826a:EMB2369	0.677733
AT5G20240.1	miR840-3p	402	6	8.10549	3.59003	no	PI	miR840-3p:PI	0.677733
AT5G54430.1	miR8167a	126	5	1.25379	2.25379	no	ATPHOS32	miR8167a:ATPHOS32	0.677733
AT1G07940.2	miR414	1411	4.5	2.70183	1.01945	no	NA	miR414:AT1G07940.2	0.679483
AT1G58230.1	miR8165	2691	5	1.35974	2.35974	no	NA	miR8165:AT1G58230.1	0.679483
AT3G23890.2	miR414	4082	5.5	1.64229	2.64229	no	ATTOPII	miR414:ATTOPII	0.679483
AT3G16260.1	miR779.1	2704	5.5	1.8542	2.8542	no	TRZ4	miR779.1:TRZ4	0.708421
AT1G73680.2	miR158a-5p	1319	5.5	1.51868	2.51868	no	ALPHA DOX2	miR158a-5p:ALPHA DOX2	0.728104
AT5G08139.1	miR4221	1225	5.5	1.83654	2.83654	no	NA	miR4221:AT5G08139.1	0.728104
AT3G27260.2	miR1886.2	818	5.5	2.0661	3.0661	no	GTE8	miR1886.2:GTE8	0.737312
AT2G47730.1	miR5021	872	4	2.86076	1.23082	no	ATGSTF5	miR5021:ATGSTF5	0.745074
AT3G45930.1	miR172d-5p	506	4.5	1.97781	0.65201	no	NA	miR172d-5p:AT3G45930.1	0.745074
AT4G31820.1	miR1886.1	236	5.5	1.28911	2.28911	no	ENP	miR1886.1:ENP	0.745074
AT5G22210.2	miR831-3p	115	5	2.75481	1.45012	no	NA	miR831-3p:AT5G22210.2	0.745074
AT5G37020.2	miR167a-5p	2380	4	1.21847	0.537726	yes	ARF8	miR167a-5p:ARF8	0.745074
AT5G56600.2	miR397b	138	5	2.04845	1.28226	no	PFN3	miR397b:PFN3	0.745074
AT2G43970.2	miR5021	284	6	1.8542	2.8542	no	AtLARP6b	miR5021:AtLARP6b	0.746136
AT1G18480.1	miR8172	1213	5.5	1.39506	2.39506	no	AtSLP2	miR8172:AtSLP2	0.746791
AT1G20140.1	miR857	493	5	1.14784	2.14784	no	ASK4	miR857:ASK4	0.746791
AT5G01400.1	miR414	4300	5.5	1.78356	2.78356	no	ESP4	miR414:ESP4	0.746791
AT5G42530.1	miR5021	97	4	0.794656	1.79466	no	NA	miR5021:AT5G42530.1	0.746791
AT4G31340.2	miR413	404	4.5	1.09486	0.597238	no	NA	miR413:AT4G31340.2	0.747776
AT5G62680.1	miR158a-5p	2178	4.5	1.88951	0.620677	no	GTR2	miR158a-5p:GTR2	0.747776
AT1G07920.1	miR414	1280	4.5	2.38397	0.721416	no	NA	miR414:AT1G07920.1	0.74779
AT1G07930.2	miR414	1061	4.5	1.78356	0.744835	no	NA	miR414:AT1G07930.2	0.74779
AT1G15670.1	miR5661	559	5	1.00656	2.00656	no	NA	miR5661:AT1G15670.1	0.74779
AT2G17500.4	miR844-5p	1417	5.5	1.32443	2.32443	no	NA	miR844-5p:AT2G17500.4	0.74779
AT5G23940.1	miR3440b-3p	713	4.5	1.02422	0.562928	no	DCR	miR3440b-3p:DCR	0.74779
AT5G56360.1	miR776	2115	5.5	5.65088	2.51709	no	PSL4	miR776:PSL4	0.74779
AT5G61510.1	miR8167a	999	5.5	1.3774	2.3774	no	NA	miR8167a:AT5G61510.1	0.74779
AT5G55130.2	miR848	1340	5.5	1.02422	2.02422	no	CNX5	miR848:CNX5	0.765878
AT3G46220.3	miR773a	1478	6	1.55399	2.55399	no	NA	miR773a:AT3G46220.3	0.774687
AT1G31580.1	miR5021	173	4	1.53633	1.06685	no	CXC750	miR5021:CXC750	0.774751
AT3G16640.1	miR414	276	4.5	1.92483	0.564074	no	TCTP	miR414:TCTP	0.774751
AT4G30440.1	miR161.1	695	5.5	1.04188	2.04188	no	GAE1	miR161.1:GAE1	0.775382
AT1G16020.2	miR8173	1916	6	1.74824	2.74824	no	NA	miR8173:AT1G16020.2	0.784377
AT3G01120.1	miR8177	1768	6	1.78356	2.78356	no	AtCGS1	miR8177:AtCGS1	0.793561
AT1G31550.2	miR401	206	6	0.988905	1.9889	no	NA	miR401:AT1G31550.2	0.822741
AT1G78930.1	miR5654-5p	1355	6	1.18315	2.18315	no	NA	miR5654-5p:AT1G78930.1	0.822741
AT3G55620.1	miR5021	87	4	1.43038	0.801897	no	eIF6A	miR5021:eIF6A	0.822741
AT4G36790.1	miR415	1559	6	0.776997	1.777	no	NA	miR415:AT4G36790.1	0.822741
AT3G02360.2	miR859	1605	5	3.17862	1.03048	no	NA	miR859:AT3G02360.2	0.823834
AT1G50170.1	miR5021	154	5	3.17862	1.45502	no	ATSIRB	miR5021:ATSIRB	0.831154
AT2G25670.2	miR408-3p	1316	5.5	2.03079	1.26543	no	NA	miR408-3p:AT2G25670.2	0.854149
AT2G48010.1	miR5025	2017	5	1.58931	0.954437	no	RKF3	miR5025:RKF3	0.87255
AT2G14910.2	miR393a-3p	723	6	1.65995	2.65995	no	NA	miR393a-3p:AT2G14910.2	0.886621
AT2G40660.1	miR169f-3p	762	5.5	0.882951	1.88295	no	NA	miR169f-3p:AT2G40660.1	0.886621
AT3G02520.1	miR868-3p	1078	5	2.38397	0.657098	no	GF14 NU	miR868-3p:GF14 NU	0.886621
AT3G02770.1	miR5642a	395	5	0.971246	0.902937	no	NA	miR5642a:AT3G02770.1	0.886621
AT3G07820.1	miR833a-5p	992	6	6.05704	2.47251	no	NA	miR833a-5p:AT3G07820.1	0.886621
AT4G29030.1	miR841b-5p	609	6	8.75887	2.44929	no	NA	miR841b-5p:AT4G29030.1	0.886621
AT5G10400.1	miR414	488	5	1.87186	0.743859	no	NA	miR414:AT5G10400.1	0.886621
AT5G56890.1	miR779.1	2389	6	1.3774	2.3774	no	NA	miR779.1:AT5G56890.1	0.886621
AT3G29075.1	miR842	423	5	1.39506	0.669344	no	NA	miR842:AT3G29075.1	0.898331
AT4G19640.1	miR156f-3p	742	5.5	2.22504	0.978569	no	ARA-7	miR156f-3p:ARA-7	0.899767
AT1G45145.1	miR837-5p	390	5	3.21394	0.502769	no	ATH5	miR837-5p:ATH5	0.907667
AT2G01140.1	miR5021	246	5	2.1544	1.12608	no	AtFBA3	miR5021:AtFBA3	0.907667
AT2G22795.1	miR831-3p	206	5.5	2.04845	1.18541	no	NA	miR831-3p:AT2G22795.1	0.907667
AT3G01130.2	miR829-5p	173	5.5	1.94249	1.337	no	NA	miR829-5p:AT3G01130.2	0.907667
AT3G15830.1	miR831-3p	819	5	1.14784	0.439682	no	NA	miR831-3p:AT3G15830.1	0.907667
AT3G27360.1	miR856	370	5.5	1.67761	0.853628	no	NA	miR856:AT3G27360.1	0.907667
AT3G28980.1	miR773a	1123	5	2.71949	0.519264	no	NA	miR773a:AT3G28980.1	0.907667
AT3G56800.1	miR837-5p	536	5	1.62463	0.41911	no	ACAM-3	miR837-5p:ACAM-3	0.907667
AT4G38740.1	miR776	534	6	9.95968	1.97886	no	ROC1	miR776:ROC1	0.907667
AT5G55930.1	miR4227	2086	5.5	0.918269	0.931407	no	ATOPT1	miR4227:ATOPT1	0.907667
AT5G62700.1	miR774a	138	5	0.971246	0.669924	no	TUB3	miR774a:TUB3	0.907667
AT5G07530.2	miR164b-3p	1497	5	9.6065	0.25251	no	ATGRP-7	miR164b-3p:ATGRP-7	0.911319
AT5G47820.2	miR158a-3p	3254	5	1.57165	0.793061	no	FRA1	miR158a-3p:FRA1	0.911319
AT3G18850.5	miR5662	1004	6	6.23363	1.8997	no	LPAT5	miR5662:LPAT5	0.92171
AT5G62690.1	miR774a	179	5	0.971246	0.556393	no	TUB2	miR774a:TUB2	0.92171
AT5G27850.1	miR396b-5p	541	5	1.7659	0.265639	no	NA	miR396b-5p:AT5G27850.1	0.92539
AT1G04790.1	miR170-3p	97	6	0.882951	1.88295	no	NA	miR170-3p:AT1G04790.1	0.926464
AT5G50920.1	miR838	2666	5.5	2.1544	0.894804	no	ATHSP93-V	miR838:ATHSP93-V	0.926464
AT1G09200.1	miR4221	102	6	4.94452	1.5468	no	NA	miR4221:AT1G09200.1	0.927514
AT1G63295.1	miR829-5p	403	6	0.865292	1.86529	no	NA	miR829-5p:AT1G63295.1	0.927514
AT3G05670.1	miR164b-3p	891	6	2.5429	1.34084	no	NA	miR164b-3p:AT3G05670.1	0.927514
AT1G13350.2	miR4221	487	5.5	1.44804	0.793849	no	NA	miR4221:AT1G13350.2	0.935122
AT1G65295.1	miR854a	115	5	3.30224	0.633413	no	NA	miR854a:AT1G65295.1	0.935122
AT3G07220.1	miR414	584	5.5	1.8542	0.826203	no	AtFHA2	miR414:AtFHA2	0.935122
AT4G17530.1	miR826b	902	6	4.90921	1.14745	no	ATRAB1C	miR826b:ATRAB1C	0.935122
AT4G20980.4	miR5651	1477	5.5	0.882951	0.891329	no	NA	miR5651:AT4G20980.4	0.935122
AT5G07430.1	miR5648-5p	563	5.5	1.71292	0.884811	no	NA	miR5648-5p:AT5G07430.1	0.935122
AT1G28960.5	miR5025	1084	6	0.882951	1.88295	no	ATNUDT15	miR5025:ATNUDT15	0.936588
AT5G57020.1	miR3440b-5p	1483	6	1.27145	1.27825	no	ATNMT1	miR3440b-5p:ATNMT1	0.936588
AT1G01590.1	miR841b-5p	561	5.5	1.87186	0.794752	no	ATFRO1	miR841b-5p:ATFRO1	0.938559
AT1G01620.2	miR157c-3p	320	5.5	1.27145	0.712116	no	PIP1;3	miR157c-3p:PIP1;3	0.938559
AT1G07210.1	miR414	857	5.5	1.69527	0.653296	no	NA	miR414:AT1G07210.1	0.938559
AT3G05220.2	miR847	1234	6	1.62463	0.980214	no	NA	miR847:AT3G05220.2	0.938559
AT5G18460.1	miR838	1663	6	2.04845	0.977356	no	NA	miR838:AT5G18460.1	0.938559
AT2G04030.2	miR156d-3p	1007	6	1.44804	1.04524	no	AtHsp90.5	miR156d-3p:AtHsp90.5	0.966777
AT1G10522.2	miR3434-3p	685	6	2.41929	0.801349	no	PRIN2	miR3434-3p:PRIN2	0.968269
AT3G26180.2	miR8184	1200	5.5	1.09486	0.60026	no	CYP71B20	miR8184:CYP71B20	0.968269
AT4G26630.2	miR847	2389	6	1.92483	1.10693	no	NA	miR847:AT4G26630.2	0.971195
AT4G01850.2	miR8165	303	6	2.24269	1.08253	no	AtSAM2	miR8165:AtSAM2	0.9932
AT3G22440.1	miR2936	1793	6	1.90717	0.789098	no	NA	miR2936:AT3G22440.1	0.993488
AT1G65060.2	miR859	1368	5.5	1.05954	0.569952	no	4CL3	miR859:4CL3	0.994651
AT2G16600.2	miR414	538	5.5	5.05048	0.386877	no	ROC3	miR414:ROC3	0.995914
AT2G20890.1	miR838	906	5.5	1.20081	0.397375	no	PSB29	miR838:PSB29	0.995914
AT2G32060.3	miR5666	435	5.5	1.3774	0.193535	no	NA	miR5666:AT2G32060.3	0.995914
AT2G32600.1	miR5021	1138	5.5	1.27145	0.407531	no	NA	miR5021:AT2G32600.1	0.995914
AT2G33120.3	miR824-3p	577	5.5	1.48336	0.293816	no	ATVAMP722	miR824-3p:ATVAMP722	0.995914
AT3G23390.1	miR832-3p	416	6	2.26035	0.590567	no	NA	miR832-3p:AT3G23390.1	0.995914
AT3G28790.1	miR5021	1897	5	1.57165	0.332767	no	NA	miR5021:AT3G28790.1	0.995914
AT3G56020.1	miR831-3p	71	6	3.24926	0.617585	no	NA	miR831-3p:AT3G56020.1	0.995914
AT3G56370.1	miR159b-5p	3080	6	2.91374	0.847112	no	NA	miR159b-5p:AT3G56370.1	0.995914
AT4G04640.1	miR5021	1310	6	1.48336	0.655219	no	ATPC1	miR5021:ATPC1	0.995914
AT4G29260.1	miR5021	232	5	0.17659	0.261669	no	NA	miR5021:AT4G29260.1	0.995914
AT4G31330.1	miR1886.1	461	6	1.16549	0.714497	no	NA	miR1886.1:AT4G31330.1	0.995914
AT5G01530.1	miR5662	896	5.5	0.706361	0.144733	no	LHCB4.1	miR5662:LHCB4.1	0.995914
AT5G15530.1	miR3434-3p	762	6	1.11252	0.565276	no	BCCP2	miR3434-3p:BCCP2	0.995914
AT5G54580.1	miR829-5p	209	6	0.847633	0.733572	no	NA	miR829-5p:AT5G54580.1	0.995914
AT1G14380.3	miR417	1951	6	1.67761	0.593161	no	IQD28	miR417:IQD28	0.997186
AT1G52300.1	miR778	330	6	1.09486	0.299848	no	NA	miR778:AT1G52300.1	0.997186
AT1G72020.1	miR5651	278	6	3.42585	0.441536	no	NA	miR5651:AT1G72020.1	0.997186
AT2G07698.1	miR867	1295	6	2.13674	0.280778	no	NA	miR867:AT2G07698.1	0.997186
AT2G14878.1	miR5655	646	6	0.653384	0.471375	no	NA	miR5655:AT2G14878.1	0.997186
AT2G22795.1	miR4221	656	6	1.23613	0.396173	no	NA	miR4221:AT2G22795.1	0.997186
AT2G22795.1	miR4221	722	6	0.247226	0.456762	no	NA	miR4221:AT2G22795.1	0.997186
AT2G27980.1	miR773a	3423	6	7.11658	0.509212	no	NA	miR773a:AT2G27980.1	0.997186
AT3G08520.1	miR831-3p	29	6	1.55399	0.750814	no	NA	miR831-3p:AT3G08520.1	0.997186
AT3G12610.1	miR3932a	1000	6	1.02422	0.291209	no	DRT100	miR3932a:DRT100	0.997186
AT3G27810.1	miR858b	498	6	0.953587	0.605756	no	ATMYB21	miR858b:ATMYB21	0.997186
AT3G50820.1	miR782	1083	6	1.8542	0.307496	no	OEC33	miR782:OEC33	0.997186
AT3G52470.1	miR5632-3p	906	6	0.935928	0.513173	no	NA	miR5632-3p:AT3G52470.1	0.997186
AT5G21940.1	miR5658	806	6	0.829974	0.400684	no	NA	miR5658:AT5G21940.1	0.997186
AT5G23740.1	miR399f	552	6	1.83654	0.234621	no	RPS11-BETA	miR399f:RPS11-BETA	0.997186
AT5G64310.1	miR417	426	6	1.28911	0.768723	no	AGP1	miR417:AGP1	0.997186

## Sheet: Col-0 (+Xrn1) (biorep #3)
Target transcript	miRNA	miRNA slice site position in target transcript	Allen score of sRNA:target duplex	Slice site RPM	Slice site RPM + 1/Maximum adjacent site RPM + 1	Previously verified by 5' RACE?	Target gene common name	Interaction name	P-value adjusted for multiple testing
AT1G77850.1	miR160a-5p	1419	0.5	2.17608	3.17608	yes	ARF17	miR160a-5p:ARF17	0
AT2G27400.1	miR173-5p	378	2.5	0.572653	1.57265	yes	TAS1a	miR173-5p:TAS1a	0
AT2G28350.1	miR160a-5p	1339	2	0.85898	1.85898	yes	ARF10	miR160a-5p:ARF10	0
AT2G39675.1	miR173-5p	378	2.5	0.302688	1.30269	yes	TAS1c	miR173-5p:TAS1c	0
AT2G39681.1	miR173-5p	417	2.5	1.53798	1.57291	yes	TAS2	miR173-5p:TAS2	0
AT4G00150.1	miR171a-3p	866	0	0.32723	1.0384	yes	ATHAM3	miR171a-3p:ATHAM3	0
AT5G39740.2	miR414	997	1.5	0.499026	0.125744	no	OLI7	miR414:OLI7	0
AT5G13990.1	miR408-3p	1477	3	0.818076	1.81808	no	ATEXO70C2	miR408-3p:ATEXO70C2	0.099458
AT1G08125.3	miR390a-3p	887	5	10.5123	9.4295	no	NA	miR390a-3p:AT1G08125.3	0.15632
AT1G28420.1	miR5021	120	2	1.05532	2.05532	no	HB-1	miR5021:HB-1	0.179433
AT5G44200.2	miR414	905	3.5	3.23958	1.89665	no	ATCBP20	miR414:ATCBP20	0.228251
AT2G39020.1	miR414	909	2.5	0.245423	0.478378	no	NA	miR414:AT2G39020.1	0.253579
AT3G44110.2	miR414	1237	2.5	0.368134	0.511058	no	ATJ	miR414:ATJ	0.253579
AT1G70700.2	miR169d	787	2.5	1.75068	1.1788	no	JAZ9	miR169d:JAZ9	0.289005
AT1G15710.1	miR5658	1209	2	2.17608	1.20482	no	NA	miR5658:AT1G15710.1	0.309169
AT5G08139.1	miR4221	1225	5.5	5.38294	6.38294	no	NA	miR4221:AT5G08139.1	0.35267
AT1G13220.2	miR414	3310	3.5	0.556292	1.0856	no	CRWN2	miR414:CRWN2	0.4327
AT1G18800.1	miR414	830	3.5	1.33346	1.12193	no	NRP2	miR414:NRP2	0.4327
AT1G26170.1	miR413	1451	4.5	0.834438	1.83444	no	NA	miR413:AT1G26170.1	0.4327
AT1G43886.1	miR5662	3992	4	0.744449	1.74445	no	NA	miR5662:AT1G43886.1	0.4327
AT1G71330.1	miR3434-5p	337	3.5	0.482665	1.48266	no	ATNAP5	miR3434-5p:ATNAP5	0.4327
AT2G11910.2	miR414	502	3	2.1679	0.482096	no	NA	miR414:AT2G11910.2	0.4327
AT2G41620.1	miR169b-3p	1886	6	1.37437	2.37437	no	NA	miR169b-3p:AT2G41620.1	0.4327
AT3G09200.2	miR5662	663	3.5	2.65875	1.06425	no	NA	miR5662:AT3G09200.2	0.4327
AT3G13200.1	miR414	505	3	1.84885	0.758294	no	EMB2769	miR414:EMB2769	0.4327
AT3G28007.1	miR414	782	3.5	0.515388	0.906972	no	AtSWEET4	miR414:AtSWEET4	0.4327
AT3G51930.1	miR863-5p	991	5	1.71796	2.71796	no	NA	miR863-5p:AT3G51930.1	0.4327
AT4G00450.1	miR5633	6797	3	0.237242	0.759082	no	CCT	miR5633:CCT	0.4327
AT1G52500.2	miR414	1099	4.5	1.03078	2.03078	no	ATFPG-1	miR414:ATFPG-1	0.43541
AT5G13640.1	miR5658	2565	2	0.114531	0.517546	no	ATPDAT	miR5658:ATPDAT	0.43541
AT1G47970.1	miR414	638	3.5	0.711726	0.730995	no	NA	miR414:AT1G47970.1	0.462118
AT2G19470.1	miR399a	889	4.5	0.744449	1.74445	no	ckl5	miR399a:ckl5	0.462118
AT1G11200.1	miR856	784	3.5	0.392677	0.821461	no	NA	miR856:AT1G11200.1	0.533174
AT4G04870.1	miR8172	931	5.5	1.25984	2.25984	no	CLS	miR8172:CLS	0.533174
AT5G24660.1	miR396b-5p	158	3.5	1.07168	0.729293	yes	LSU2	miR396b-5p:LSU2	0.533174
AT5G65670.2	miR172b-5p	1057	3.5	1.83249	0.99712	no	IAA9	miR172b-5p:IAA9	0.533174
AT4G02940.1	miR415	1936	3	0.245423	0.956041	no	NA	miR415:AT4G02940.1	0.537818
AT3G28820.1	miR5998a	1362	3.5	1.67706	0.733327	no	NA	miR5998a:AT3G28820.1	0.540753
AT3G63130.2	miR847	1841	6	5.30113	4.80683	no	ATRANGAP1	miR847:ATRANGAP1	0.6091
AT1G06040.2	miR1886.1	706	3.5	1.93884	0.775493	no	BBX24	miR1886.1:BBX24	0.640818
AT3G02970.1	miR854a	83	4	0.245423	1.24542	no	EXL6	miR854a:EXL6	0.640818
AT3G25520.2	miR414	699	3.5	0.883522	0.229724	no	ATL5	miR414:ATL5	0.640818
AT3G49010.5	miR5662	83	3.5	0.245423	0.405711	no	ATBBC1	miR5662:ATBBC1	0.640818
AT4G31000.2	miR2934-3p	1186	4	0.229061	1.22906	no	NA	miR2934-3p:AT4G31000.2	0.640818
AT4G37980.2	miR5644	984	3.5	0.392677	0.347256	no	ATCAD7	miR5644:ATCAD7	0.640818
AT5G57735.1	miR390a-5p	428	4.5	0.523569	1.52357	yes	TAS3c	miR390a-5p:TAS3c	0.640818
AT5G66030.2	miR390b-3p	187	4.5	0.368134	1.36813	no	ATGRIP	miR390b-3p:ATGRIP	0.640818
AT5G26000.2	miR4227	851	4	1.93884	1.40197	no	AtTGG1	miR4227:AtTGG1	0.657733
AT3G53370.2	miR866-3p	263	5	4.56487	1.84728	no	NA	miR866-3p:AT3G53370.2	0.667364
AT4G17100.2	miR414	241	4.5	0.359954	1.35995	no	NA	miR414:AT4G17100.2	0.667364
AT4G18030.1	miR5999	2119	3.5	0.891703	0.515882	no	NA	miR5999:AT4G18030.1	0.667364
AT1G67470.1	miR869.2	657	5	1.08804	2.08804	no	NA	miR869.2:AT1G67470.1	0.67817
AT1G32928.1	miR5021	238	4.5	1.39073	2.37133	no	NA	miR5021:AT1G32928.1	0.684921
AT2G30260.1	miR5662	749	4	0.376315	1.37631	no	U2B''	miR5662:U2B''	0.689599
AT1G54380.1	miR406	857	4.5	0.335411	1.33541	no	NA	miR406:AT1G54380.1	0.699876
AT3G04130.2	miR472-3p	567	5.5	1.2353	2.2353	no	NA	miR472-3p:AT3G04130.2	0.699876
AT1G12820.1	miR393a-5p	1894	4	0.294507	0.96937	yes	AFB3	miR393a-5p:AFB3	0.708001
AT1G19870.1	miR4227	2242	4	0.139073	1.13907	no	iqd32	miR4227:iqd32	0.708001
AT1G48540.2	miR169a-3p	2658	5	1.70978	1.72306	no	NA	miR169a-3p:AT1G48540.2	0.718178
AT2G19740.1	miR847	414	3.5	1.1044	0.380395	no	NA	miR847:AT2G19740.1	0.718178
AT1G27320.1	miR5013	1342	4.5	1.30892	1.20492	no	AHK3	miR5013:AHK3	0.732787
AT1G70280.2	miR3434-3p	712	4.5	0.597196	1.20341	no	NA	miR3434-3p:AT1G70280.2	0.732787
AT2G46330.2	miR156i	540	4	1.69342	1.12277	no	AGP16	miR156i:AGP16	0.732787
AT3G12820.1	miR858b	305	6	1.67706	2.67706	no	AtMYB10	miR858b:AtMYB10	0.732787
AT4G23000.1	miR169f-3p	3698	6	1.35801	2.35801	no	NA	miR169f-3p:AT4G23000.1	0.732787
AT1G75090.1	miR5021	315	6	1.12076	2.12076	no	NA	miR5021:AT1G75090.1	0.735789
AT3G02750.3	miR5024-5p	2114	4	0.793534	0.779547	no	NA	miR5024-5p:AT3G02750.3	0.735789
AT3G50000.1	miR5021	1267	2.5	0.32723	0.222782	no	ATCKA2	miR5021:ATCKA2	0.735789
AT3G52420.1	miR834	205	4.5	0.703546	1.12416	no	ATOEP7	miR834:ATOEP7	0.735789
AT1G16720.1	miR868-3p	1851	4	0.695365	0.521697	no	HCF173	miR868-3p:HCF173	0.741016
AT1G17520.1	miR834	413	6	1.12895	2.12895	no	NA	miR834:AT1G17520.1	0.741016
AT1G63770.5	miR158a-3p	3322	4	0.523569	0.94423	no	NA	miR158a-3p:AT1G63770.5	0.741016
AT1G69530.5	miR162a-3p	941	6	12.0094	2.09177	no	AT-EXP1	miR162a-3p:AT-EXP1	0.741016
AT4G18596.1	miR159b-5p	579	4	4.57305	0.769554	no	NA	miR159b-5p:AT4G18596.1	0.741016
AT5G05990.1	miR414	400	4	0.0899884	0.543302	no	NA	miR414:AT5G05990.1	0.741016
AT2G46030.1	miR414	561	4.5	1.90612	1	no	UBC6	miR414:UBC6	0.743629
AT3G23810.1	miR172d-5p	976	3.5	0.0981691	0.248479	no	ATSAHH2	miR172d-5p:ATSAHH2	0.743629
AT1G70190.2	miR165a-5p	96	5	0.932607	1.93261	no	NA	miR165a-5p:AT1G70190.2	0.759761
AT2G11910.2	miR414	442	4	0.85898	0.785643	no	NA	miR414:AT2G11910.2	0.759761
AT3G43860.1	miR398a-3p	668	6	1.88158	2.88158	no	AtGH9A4	miR398a-3p:AtGH9A4	0.759761
AT3G58560.1	miR779.1	1864	5	0.842618	1.84262	no	NA	miR779.1:AT3G58560.1	0.759761
AT3G61580.1	miR5021	1144	6	3.87768	2.79611	no	AtSLD1	miR5021:AtSLD1	0.759761
AT3G61620.2	miR2934-5p	999	5	0.719907	1.71991	no	RRP41	miR2934-5p:RRP41	0.759761
AT4G27700.1	miR835-3p	561	4	0.409038	1.40904	no	NA	miR835-3p:AT4G27700.1	0.759761
AT5G37020.2	miR167a-5p	2380	4	0.589015	1.13432	yes	ARF8	miR167a-5p:ARF8	0.759761
AT5G41940.1	miR773b-3p	1303	5.5	1.22711	2.22711	no	NA	miR773b-3p:AT5G41940.1	0.759761
AT2G23350.1	miR156f-3p	1923	4	0.220881	0.696599	no	PAB4	miR156f-3p:PAB4	0.763414
AT4G23650.1	miR157a-5p	727	4	1.17803	0.670223	no	CDPK6	miR157a-5p:CDPK6	0.768184
AT4G40000.1	miR157a-3p	1725	5.5	0.687184	1.68718	no	NA	miR157a-3p:AT4G40000.1	0.768184
AT5G55230.2	miR172c	2003	4	0.867161	0.638896	no	ATMAP65-1	miR172c:ATMAP65-1	0.768184
AT5G59390.1	miR824-3p	346	5	1.00623	1.23088	no	NA	miR824-3p:AT5G59390.1	0.771796
AT3G11250.1	miR5662	764	4	0.0245423	0.644766	no	NA	miR5662:AT3G11250.1	0.79359
AT5G07410.1	miR5654-5p	1349	3.5	0.736269	0.0909627	no	NA	miR5654-5p:AT5G07410.1	0.79359
AT5G11780.1	miR2937	148	6	1.11258	2.11258	no	NA	miR2937:AT5G11780.1	0.79359
AT5G62570.2	miR156h	1611	4	0.818076	1.08283	no	NA	miR156h:AT5G62570.2	0.797194
AT1G10740.4	miR838	360	5	1.39891	1.20062	no	NA	miR838:AT1G10740.4	0.812963
AT1G15690.2	miR414	2086	4	0.400857	0.0410422	no	AtAVP1	miR414:AtAVP1	0.812963
AT1G20560.2	miR5654-5p	1050	5	0.261784	1.26178	no	AAE1	miR5654-5p:AAE1	0.812963
AT1G50055.1	miR173-5p	373	4.5	0.507207	0.705248	yes	TAS1b	miR173-5p:TAS1b	0.812963
AT1G75730.2	miR773a	745	5.5	0.507207	1.50721	no	NA	miR773a:AT1G75730.2	0.812963
AT2G37620.2	miR845b	858	6	2.53604	1.81431	no	AAc1	miR845b:AAc1	0.812963
AT3G20520.1	miR5017-5p	2205	5	2.47059	1.24323	no	GDPDL5	miR5017-5p:GDPDL5	0.812963
AT3G20650.2	miR407	978	5.5	0.53993	1.53993	no	NA	miR407:AT3G20650.2	0.812963
AT3G56910.1	miR5021	151	3.5	1.18621	0.743902	no	PSRP5	miR5021:PSRP5	0.812963
AT4G15630.1	miR863-3p	641	6	0.703546	1.70355	no	NA	miR863-3p:AT4G15630.1	0.812963
AT4G17170.1	miR156c-3p	526	4.5	0.237242	0.568056	no	AT-RAB2	miR156c-3p:AT-RAB2	0.812963
AT4G32250.3	miR396a-5p	1759	5	0.957149	1.26422	no	NA	miR396a-5p:AT4G32250.3	0.812963
AT5G23670.2	miR2936	79	4.5	0.53175	0.899154	no	LCB2	miR2936:LCB2	0.812963
AT5G41700.5	miR5658	966	4	3.24776	0.721928	no	ATUBC8	miR5658:ATUBC8	0.812963
AT3G13040.2	miR393a-3p	1458	5.5	2.11882	1.94273	no	NA	miR393a-3p:AT3G13040.2	0.81579
AT2G01710.1	miR869.2	288	6	0.580834	1.58083	no	NA	miR869.2:AT2G01710.1	0.817971
AT5G42240.1	miR3434-3p	779	4.5	0.294507	0.742072	no	scpl42	miR3434-3p:scpl42	0.817971
AT1G30490.1	miR841a-3p	975	5.5	0.523569	1.52357	yes	ATHB9	miR841a-3p:ATHB9	0.82
AT3G24570.2	miR5021	251	6	1.15349	2.15349	no	NA	miR5021:AT3G24570.2	0.852096
AT4G09010.1	miR5021	203	4	1.2353	0.872302	no	APX4	miR5021:APX4	0.862721
AT3G48860.2	miR2934-3p	1729	5.5	0.4254	1.4254	no	NA	miR2934-3p:AT3G48860.2	0.871434
AT3G55620.1	miR776	658	4.5	0.351773	0.459968	no	eIF6A	miR776:eIF6A	0.871434
AT1G22070.1	miR8170-3p	1275	5	0.523569	1.52357	no	TGA3	miR8170-3p:TGA3	0.886846
AT2G17390.1	miR167d	363	4.5	0.2127	0.492095	no	AKR2B	miR167d:AKR2B	0.886846
AT5G62700.1	miR774a	138	5	2.41332	1.31938	no	TUB3	miR774a:TUB3	0.886846
AT3G58990.1	miR5998a	684	6	0.613557	1.61356	no	IPMI1	miR5998a:IPMI1	0.893824
AT4G26570.2	miR773a	658	5	0.499026	0.968294	no	ATCBL3	miR773a:ATCBL3	0.893824
AT1G01630.1	miR8171	978	6	4.21309	1.40287	no	NA	miR8171:AT1G01630.1	0.901644
AT1G07920.1	miR414	1280	4.5	1.00623	0.347245	no	NA	miR414:AT1G07920.1	0.901644
AT1G27370.4	miR4245	1614	6	1.39073	1.51232	no	SPL10	miR4245:SPL10	0.901644
AT1G35310.1	miR414	288	4.5	0.916245	0.358031	no	MLP168	miR414:MLP168	0.901644
AT1G45145.1	miR837-5p	390	5	1.66888	0.855734	no	ATH5	miR837-5p:ATH5	0.901644
AT1G61150.7	miR156h	920	6	0.302688	1.30269	no	NA	miR156h:AT1G61150.7	0.901644
AT2G12060.1	miR395b	1909	5.5	0.122711	1.12271	no	NA	miR395b:AT2G12060.1	0.901644
AT2G27030.3	miR837-5p	445	5	2.11064	0.979396	no	ACAM-2	miR837-5p:ACAM-2	0.901644
AT2G36580.1	miR169f-3p	1402	6	1.28438	1.48343	no	NA	miR169f-3p:AT2G36580.1	0.901644
AT2G43710.2	miR157a-3p	517	5	0.891703	0.677644	no	FAB2	miR157a-3p:FAB2	0.901644
AT3G03773.2	miR414	484	5	0.441761	0.80755	no	NA	miR414:AT3G03773.2	0.901644
AT3G07810.2	miR390b-3p	1005	5	0.744449	0.806991	no	NA	miR390b-3p:AT3G07810.2	0.901644
AT3G29075.1	miR414	714	4.5	0.302688	0.400863	no	NA	miR414:AT3G29075.1	0.901644
AT3G50550.2	miR414	93	4.5	0.335411	0.410932	no	NA	miR414:AT3G50550.2	0.901644
AT3G52930.1	miR863-5p	351	4.5	0.679003	0.423837	no	AtFBA8	miR863-5p:AtFBA8	0.901644
AT3G59020.2	miR414	2829	5.5	0.891703	1.17238	no	NA	miR414:AT3G59020.2	0.901644
AT4G04640.1	miR5021	1310	6	3.01052	1.34224	no	ATPC1	miR5021:ATPC1	0.901644
AT4G15410.1	miR837-5p	86	4.5	0.368134	0.455393	no	PUX5	miR837-5p:PUX5	0.901644
AT4G19880.3	miR781a	494	6	0.548111	1.54811	no	NA	miR781a:AT4G19880.3	0.901644
AT5G13140.1	miR3440b-3p	681	6	2.5933	1.35051	no	NA	miR3440b-3p:AT5G13140.1	0.901644
AT5G15948.1	miR5021	1625	3.5	0.261784	0.325233	no	CPuORF10	miR5021:CPuORF10	0.901644
AT5G15950.2	miR5021	1704	3.5	0.261784	0.325233	no	NA	miR5021:AT5G15950.2	0.901644
AT5G22000.3	miR2937	305	5.5	0.981691	1.14135	no	RHF2A	miR2937:RHF2A	0.901644
AT5G43630.1	miR5021	38	5	0.130892	1.13089	no	TZP	miR5021:TZP	0.901644
AT5G47820.2	miR158a-3p	3254	5	1.15349	1.05195	no	FRA1	miR158a-3p:FRA1	0.901644
AT5G61130.1	miR5021	121	4	0.932607	0.786834	no	PDCB1	miR5021:PDCB1	0.901644
AT5G64030.1	miR162a-5p	2071	5	0.499026	0.690843	no	NA	miR162a-5p:AT5G64030.1	0.901644
AT5G67460.1	miR8171	1293	5.5	0.229061	1.04887	no	NA	miR8171:AT5G67460.1	0.901644
AT1G07940.2	miR414	1411	4.5	1.17803	0.329814	no	NA	miR414:AT1G07940.2	0.904022
AT3G14110.3	miR396b-5p	773	4.5	0.188158	0.406558	no	FLU	miR396b-5p:FLU	0.904022
AT2G27170.2	miR862-3p	2458	5.5	0.760811	1.76081	no	SMC3	miR862-3p:SMC3	0.90502
AT1G31580.1	miR5021	173	4	1.66888	0.623499	no	CXC750	miR5021:CXC750	0.907596
AT3G24860.1	miR856	676	5.5	0.409038	0.988521	no	NA	miR856:AT3G24860.1	0.907596
AT1G07930.2	miR414	1061	4.5	0.883522	0.278658	no	NA	miR414:AT1G07930.2	0.90793
AT1G76810.1	miR158a-5p	4352	5	0.409038	0.775016	no	NA	miR158a-5p:AT1G76810.1	0.90793
AT3G51260.2	miR5662	133	5.5	0.269965	0.98728	no	PAD1	miR5662:PAD1	0.90793
AT5G40490.1	miR4227	1194	5	0.163615	0.732287	no	NA	miR4227:AT5G40490.1	0.90793
AT3G06540.1	miR156b-3p	1929	5	0.32723	0.595943	no	AthREP	miR156b-3p:AthREP	0.909793
AT2G32700.7	miR408-3p	970	6	0.744449	1.74445	no	LUH	miR408-3p:LUH	0.925257
AT1G11840.6	miR156h	1209	4	0.899884	0.0855942	no	ATGLX1	miR156h:ATGLX1	0.941157
AT1G23240.3	miR5021	569	3.5	0.400857	0.0796738	no	NA	miR5021:AT1G23240.3	0.941157
AT1G29930.1	miR842	223	4.5	0.670822	0.119281	no	AB140	miR842:AB140	0.941157
AT1G55330.1	miR414	96	4.5	0.719907	0.0467483	no	AGP21	miR414:AGP21	0.941157
AT2G04305.1	miR837-5p	1785	6	0.302688	1.30269	no	NA	miR837-5p:AT2G04305.1	0.941157
AT3G27360.1	miR856	370	5.5	1.97974	0.926251	no	NA	miR856:AT3G27360.1	0.941157
AT3G63140.1	miR170-5p	524	5	0.490846	0.578096	no	CSP41A	miR170-5p:CSP41A	0.941157
AT4G28660.2	miR157a-5p	159	5	0.728088	0.680891	no	PSB28	miR157a-5p:PSB28	0.941157
AT4G36890.1	miR5021	347	5	0.376315	0.889029	no	IRX14	miR5021:IRX14	0.941157
AT4G38740.1	miR776	534	6	6.69186	1.26336	no	ROC1	miR776:ROC1	0.941157
AT5G67200.1	miR402	1880	6	0.253604	1.24343	no	NA	miR402:AT5G67200.1	0.941157
AT4G18970.2	miR862-5p	1262	6	1.94702	1.24547	no	NA	miR862-5p:AT4G18970.2	0.949118
AT5G46640.1	miR5021	170	6	1.79977	1.11756	no	NA	miR5021:AT5G46640.1	0.949118
AT1G48280.1	miR865-3p	470	6	0.253604	1.2536	no	NA	miR865-3p:AT1G48280.1	0.952629
AT2G45290.1	miR3434-5p	2260	5	1.1044	0.606352	no	NA	miR3434-5p:AT2G45290.1	0.952629
AT3G01820.1	miR167c-5p	834	5	0.53175	0.609424	no	NA	miR167c-5p:AT3G01820.1	0.952629
AT1G27400.1	miR773a	591	5	1.0635	0.535266	no	NA	miR773a:AT1G27400.1	0.955399
AT1G65060.2	miR859	1368	5.5	0.597196	0.822963	no	4CL3	miR859:4CL3	0.955399
AT3G26840.1	miR3434-3p	2088	5	2.18426	0.621549	no	PES2	miR3434-3p:PES2	0.955399
AT5G26710.1	miR414	2123	5	0.43358	0.535505	no	NA	miR414:AT5G26710.1	0.955399
AT4G02940.1	miR8172	1827	6	1.96338	1	no	NA	miR8172:AT4G02940.1	0.962358
AT5G28640.1	miR779.1	944	6	2.50331	1.17571	no	AN3	miR779.1:AN3	0.977968
AT1G10670.4	miR162a-5p	939	5.5	1.21893	0.681094	no	ACLA-1	miR162a-5p:ACLA-1	0.9836
AT1G07360.1	miR829-5p	510	6	0.638099	1.6381	no	MAC5A	miR829-5p:MAC5A	0.98414
AT1G22910.3	miR5020a	1205	5	0.973511	1.23561	no	NA	miR5020a:AT1G22910.3	0.98414
AT2G32060.3	miR5666	435	5.5	2.51149	1.32384	no	NA	miR5666:AT2G32060.3	0.98414
AT2G34560.2	miR5021	40	4	0.458123	0.674535	no	AtCCP1	miR5021:AtCCP1	0.98414
AT3G05590.1	miR773a	398	6	5.96378	1.56409	no	RPL18	miR773a:RPL18	0.98414
AT3G09980.1	miR5021	909	6	0.662642	1.58485	no	NA	miR5021:AT3G09980.1	0.98414
AT4G23820.1	miR870-5p	1356	5	0.908065	1.09379	no	NA	miR870-5p:AT4G23820.1	0.98414
AT5G45390.1	miR5640	372	5	0.310869	0.83354	no	CLPP4	miR5640:CLPP4	0.98414
AT2G26770.2	miR5021	29	5	0.654461	0.75395	no	SCAB1	miR5021:SCAB1	0.987144
AT3G60260.4	miR156f-3p	296	5	0.0245423	0.442166	no	NA	miR156f-3p:AT3G60260.4	0.987144
AT1G60070.2	miR5645a	268	5.5	0.179977	1.17998	no	NA	miR5645a:AT1G60070.2	0.990923
AT3G48780.1	miR838	1726	5	0.621738	0.647333	no	ATSPT1	miR838:ATSPT1	0.990923
AT3G63500.2	miR840-3p	3372	6	0.572653	1.57265	no	TTA2	miR840-3p:TTA2	0.990923
AT4G27430.2	miR5661	700	6	1.52162	1.41889	no	CIP7	miR5661:CIP7	0.990923
AT5G56360.1	miR776	2115	5.5	0.899884	1.15405	no	PSL4	miR776:PSL4	0.990923
AT5G59870.1	miR5654-3p	348	5.5	2.78964	0.643173	no	HTA6	miR5654-3p:HTA6	0.994379
AT1G01800.2	miR171c-5p	925	5.5	0.818076	0.332076	no	NA	miR171c-5p:AT1G01800.2	0.999928
AT1G02280.2	miR5650	645	6	1.05532	0.815079	no	ATTOC33	miR5650:ATTOC33	0.999928
AT1G06760.1	miR834	682	6	0.310869	0.287558	no	NA	miR834:AT1G06760.1	0.999928
AT1G07320.4	miR1886.1	100	6	0.597196	0.54197	no	EMB2784	miR1886.1:EMB2784	0.999928
AT1G07320.4	miR865-3p	595	5	0.719907	0.186839	no	EMB2784	miR865-3p:EMB2784	0.999928
AT1G07920.1	miR861-5p	491	6	0.0981691	0.451619	no	NA	miR861-5p:AT1G07920.1	0.999928
AT1G07930.2	miR861-5p	503	6	0.998053	0.511774	no	NA	miR861-5p:AT1G07930.2	0.999928
AT1G07940.2	miR861-5p	622	6	0.0654461	0.492881	no	NA	miR861-5p:AT1G07940.2	0.999928
AT1G10390.2	miR5028	2626	6	0.449942	0.686337	no	NA	miR5028:AT1G10390.2	0.999928
AT1G10940.2	miR847	1460	5.5	0.736269	0.718872	no	ASK1	miR847:ASK1	0.999928
AT1G10950.1	miR5024-5p	1797	5.5	0.989872	0.385946	no	AtTMN1	miR5024-5p:AtTMN1	0.999928
AT1G12080.2	miR838	461	5.5	1.53798	0.256769	no	NA	miR838:AT1G12080.2	0.999928
AT1G17745.2	miR839-5p	1917	6	1.66069	0.738777	no	PGDH	miR839-5p:PGDH	0.999928
AT1G18260.1	miR416	2259	6	0.278146	0.277392	no	EBS5	miR416:EBS5	0.999928
AT1G18740.1	miR865-3p	1282	6	2.15972	0.791085	no	NA	miR865-3p:AT1G18740.1	0.999928
AT1G19660.2	miR414	506	6	0.31905	0.513107	no	NA	miR414:AT1G19660.2	0.999928
AT1G19770.1	miR854a	393	5	1.43981	0.614621	no	ATPUP14	miR854a:ATPUP14	0.999928
AT1G20010.1	miR156a-5p	603	6	0.269965	0.467249	no	TUB5	miR156a-5p:TUB5	0.999928
AT1G20760.1	miR171a-3p	1578	5.5	1.29256	0.441154	no	NA	miR171a-3p:AT1G20760.1	0.999928
AT1G22200.2	miR172b-5p	985	6	0.64628	0.446959	no	NA	miR172b-5p:AT1G22200.2	0.999928
AT1G22380.1	miR157a-3p	1302	6	0.973511	0.688784	no	AtUGT85A3	miR157a-3p:AtUGT85A3	0.999928
AT1G24260.3	miR5658	794	6	0.711726	0.186947	no	AGL9	miR5658:AGL9	0.999928
AT1G26480.1	miR414	192	6	0.0981691	0.392235	no	GF14 IOTA	miR414:GF14 IOTA	0.999928
AT1G27710.2	miR170-3p	661	6	0.392677	0.243811	no	NA	miR170-3p:AT1G27710.2	0.999928
AT1G27970.2	miR5020a	276	6	6.20102	0.407473	no	NTF2B	miR5020a:NTF2B	0.999928
AT1G28270.1	miR838	391	6	1.69342	0.508682	no	RALFL4	miR838:RALFL4	0.999928
AT1G32130.2	miR847	736	5.5	0.466303	0.522197	no	ATIWS1	miR847:ATIWS1	0.999928
AT1G35620.1	miR157c-3p	1137	5.5	0.343592	0.420867	no	ATPDI8	miR157c-3p:ATPDI8	0.999928
AT1G48920.1	miR414	1280	5.5	0.335411	0.595241	no	ATNUC-L1	miR414:ATNUC-L1	0.999928
AT1G50010.1	miR5641	96	6	1.05532	0.297945	no	TUA2	miR5641:TUA2	0.999928
AT1G52300.1	miR778	330	6	0.589015	0.0423801	no	NA	miR778:AT1G52300.1	0.999928
AT1G55670.1	miR157d	654	5.5	0.294507	0.148687	no	PSAG	miR157d:PSAG	0.999928
AT1G60950.1	miR773b-3p	423	5.5	1.55434	0.101731	no	ATFD2	miR773b-3p:ATFD2	0.999928
AT1G64090.2	miR5658	1173	6	1.50526	0.573224	no	RTNLB3	miR5658:RTNLB3	0.999928
AT1G65295.1	miR854a	115	5	2.03701	0.285955	no	NA	miR854a:AT1G65295.1	0.999928
AT1G68010.2	miR5646	1243	5.5	0.883522	0.221119	no	ATHPR1	miR5646:ATHPR1	0.999928
AT1G68140.3	miR414	1013	5.5	0.253604	0.577738	no	NA	miR414:AT1G68140.3	0.999928
AT1G68790.1	miR164b-3p	2396	6	0.286327	0.649106	no	CRWN3	miR164b-3p:CRWN3	0.999928
AT1G71170.1	miR4227	481	6	1.21893	0.934534	no	NA	miR4227:AT1G71170.1	0.999928
AT1G72020.1	miR5651	278	6	1.04714	0.355837	no	NA	miR5651:AT1G72020.1	0.999928
AT1G72550.2	miR157d	68	6	0.53175	0.629927	no	NA	miR157d:AT1G72550.2	0.999928
AT1G74060.1	miR835-3p	810	5.5	0.253604	0.207012	no	NA	miR835-3p:AT1G74060.1	0.999928
AT1G75500.2	miR868-3p	1230	6	0.359954	0.768773	no	UMAMIT5	miR868-3p:UMAMIT5	0.999928
AT1G75930.1	miR5021	178	4	3.16595	0.261787	no	EXL6	miR5021:EXL6	0.999928
AT2G01140.1	miR5021	246	5	0.490846	0.373256	no	AtFBA3	miR5021:AtFBA3	0.999928
AT2G04390.1	miR847	328	5	0.0899884	0.29858	no	NA	miR847:AT2G04390.1	0.999928
AT2G04570.1	miR834	401	5	1.53798	0.377309	no	NA	miR834:AT2G04570.1	0.999928
AT2G04570.1	miR774b-3p	984	6	0.875342	0.110251	no	NA	miR774b-3p:AT2G04570.1	0.999928
AT2G05220.2	miR847	336	5	0.335411	0.111332	no	NA	miR847:AT2G05220.2	0.999928
AT2G11910.2	miR414	286	6	0.867161	0.581886	no	NA	miR414:AT2G11910.2	0.999928
AT2G19770.1	miR171b-3p	120	6	0.269965	0.24059	no	PRF5	miR171b-3p:PRF5	0.999928
AT2G20260.1	miR834	241	6	0.32723	0.304822	no	PSAE-2	miR834:PSAE-2	0.999928
AT2G20890.1	miR838	906	5.5	1.12895	0.474682	no	PSB29	miR838:PSB29	0.999928
AT2G21520.2	miR866-5p	288	5.5	0.605376	0.491531	no	NA	miR866-5p:AT2G21520.2	0.999928
AT2G27980.1	miR413	2571	6	0.556292	0.994771	no	NA	miR413:AT2G27980.1	0.999928
AT2G30432.1	miR158a-5p	486	5.5	0.147254	0.714633	no	TCL1	miR158a-5p:TCL1	0.999928
AT2G31370.6	miR5017-3p	1521	5.5	0.916245	0.780173	no	NA	miR5017-3p:AT2G31370.6	0.999928
AT2G32260.1	miR414	1042	6	0.605376	0.462566	no	ATCCT1	miR414:ATCCT1	0.999928
AT2G35490.1	miR399c-5p	1185	6	0.269965	0.36166	no	NA	miR399c-5p:AT2G35490.1	0.999928
AT2G41430.5	miR3434-5p	702	5.5	0.687184	0.155859	no	CID1	miR3434-5p:CID1	0.999928
AT2G43710.2	miR5632-5p	1274	6	2.89599	0.483865	no	FAB2	miR5632-5p:FAB2	0.999928
AT2G44065.2	miR838	793	6	0.564473	0.812956	no	NA	miR838:AT2G44065.2	0.999928
AT2G44100.2	miR156i	1564	6	0.760811	0.389051	no	AT-GDI1	miR156i:AT-GDI1	0.999928
AT2G44610.1	miR4221	598	6	1.46436	1.0451	no	ATRAB6A	miR4221:ATRAB6A	0.999928
AT2G47110.2	miR838	303	6	1.07168	0.277906	no	UBI6	miR838:UBI6	0.999928
AT3G01130.2	miR829-5p	173	5.5	0.10635	0.312878	no	NA	miR829-5p:AT3G01130.2	0.999928
AT3G01230.1	miR859	541	6	0.629919	0.31917	no	NA	miR859:AT3G01230.1	0.999928
AT3G01390.2	miR837-5p	470	5.5	0.605376	0.513392	no	AVMA10	miR837-5p:AVMA10	0.999928
AT3G07410.1	miR158a-5p	557	6	0.188158	0.659459	no	AtRABA5b	miR158a-5p:AtRABA5b	0.999928
AT3G08520.1	miR831-3p	29	6	1.43163	0.15033	no	NA	miR831-3p:AT3G08520.1	0.999928
AT3G09300.1	miR414	1143	5.5	0.32723	0.433516	no	ORP3B	miR414:ORP3B	0.999928
AT3G11120.1	miR831-3p	105	5	1.01441	0.109573	no	NA	miR831-3p:AT3G11120.1	0.999928
AT3G12470.1	miR3440b-3p	357	6	0.359954	0.603978	no	NA	miR3440b-3p:AT3G12470.1	0.999928
AT3G12610.1	miR172d-5p	646	5.5	0.188158	0.32402	no	DRT100	miR172d-5p:DRT100	0.999928
AT3G15830.1	miR831-3p	819	5	0.564473	0.250234	no	NA	miR831-3p:AT3G15830.1	0.999928
AT3G16830.1	miR8180	2997	6	0.703546	0.63635	no	TPR2	miR8180:TPR2	0.999928
AT3G17160.1	miR847	291	6	0.482665	0.450575	no	NA	miR847:AT3G17160.1	0.999928
AT3G18850.5	miR5662	1004	6	0.43358	0.503214	no	LPAT5	miR5662:LPAT5	0.999928
AT3G19820.3	miR397b	1251	5.5	0.384496	0.373398	no	CBB1	miR397b:CBB1	0.999928
AT3G22440.1	miR162a-3p	523	6	0.343592	0.558181	no	NA	miR162a-3p:AT3G22440.1	0.999928
AT3G25400.1	miR414	462	6	0.466303	0.542754	no	NA	miR414:AT3G25400.1	0.999928
AT3G26100.2	miR169f-3p	2070	6	0.768992	0.601935	no	NA	miR169f-3p:AT3G26100.2	0.999928
AT3G27810.1	miR858a	499	5	0.695365	0.262248	no	ATMYB21	miR858a:ATMYB21	0.999928
AT3G28500.1	miR2936	237	6	0.695365	0.244028	no	NA	miR2936:AT3G28500.1	0.999928
AT3G28830.1	miR854a	1623	5	3.63226	0.260311	no	NA	miR854a:AT3G28830.1	0.999928
AT3G46030.1	miR4243	261	5.5	0.359954	0.285516	no	HTB11	miR4243:HTB11	0.999928
AT3G48870.2	miR865-3p	1286	6	0.400857	0.617656	no	ATCLPC	miR865-3p:ATCLPC	0.999928
AT3G48930.1	miR5020c	437	6	1.03078	0.209089	no	EMB1080	miR5020c:EMB1080	0.999928
AT3G49910.1	miR172b-5p	606	5.5	0.53993	0.207028	no	NA	miR172b-5p:AT3G49910.1	0.999928
AT3G52800.1	miR5658	447	6	0.368134	0.263268	no	NA	miR5658:AT3G52800.1	0.999928
AT3G52890.2	miR390a-5p	2954	5.5	0.474484	0.161036	no	KIPK	miR390a-5p:KIPK	0.999928
AT3G53420.2	miR5638b	946	6	0.883522	0.254903	no	AtPIP2;1	miR5638b:AtPIP2;1	0.999928
AT3G54320.3	miR841a-5p	1519	6	0.392677	0.769479	no	ASML1	miR841a-5p:ASML1	0.999928
AT3G55330.1	miR839-5p	702	6	2.65875	0.0171782	no	PPL1	miR839-5p:PPL1	0.999928
AT3G56020.1	miR831-3p	71	6	1.67706	0.439106	no	NA	miR831-3p:AT3G56020.1	0.999928
AT3G56370.1	miR159b-5p	3080	6	1.16167	0.838217	no	NA	miR159b-5p:AT3G56370.1	0.999928
AT3G62250.1	miR838	281	6	0.449942	0.215818	no	UBQ5	miR838:UBQ5	0.999928
AT4G00755.2	miR2937	1119	5	1.2353	0.0651461	no	NA	miR2937:AT4G00755.2	0.999928
AT4G01150.2	miR3440b-3p	252	5.5	1.19439	0.400811	no	NA	miR3440b-3p:AT4G01150.2	0.999928
AT4G01220.2	miR854a	348	6	0.409038	0.425029	no	MGP4	miR854a:MGP4	0.999928
AT4G02930.1	miR8172	214	6	0.474484	0.580968	no	NA	miR8172:AT4G02930.1	0.999928
AT4G02940.1	miR5021	1812	6	1.00623	0.677007	no	NA	miR5021:AT4G02940.1	0.999928
AT4G13615.1	miR774b-5p	14	5.5	2.08609	0.665043	no	NA	miR774b-5p:AT4G13615.1	0.999928
AT4G17090.1	miR5998a	1652	6	0.482665	0.265652	no	AtBAM3	miR5998a:AtBAM3	0.999928
AT4G17530.1	miR826b	902	6	0.2127	0.303618	no	ATRAB1C	miR826b:ATRAB1C	0.999928
AT4G19640.1	miR156f-3p	742	5.5	0.400857	0.500347	no	ARA-7	miR156f-3p:ARA-7	0.999928
AT4G26230.1	miR414	332	5	1.21075	0.212913	no	NA	miR414:AT4G26230.1	0.999928
AT4G27580.1	miR822-5p	654	6	0.294507	0.770997	no	NA	miR822-5p:AT4G27580.1	0.999928
AT4G29030.1	miR841b-5p	609	6	0.703546	0.442835	no	NA	miR841b-5p:AT4G29030.1	0.999928
AT4G33110.2	miR5644	594	6	0.368134	0.431874	no	NA	miR5644:AT4G33110.2	0.999928
AT4G34480.1	miR397b	478	6	0.237242	0.626924	no	NA	miR397b:AT4G34480.1	0.999928
AT4G34710.2	miR8180	440	6	0.736269	0.785376	no	ADC2	miR8180:ADC2	0.999928
AT4G34881.1	miR5662	186	5.5	0.278146	0.598067	no	NA	miR5662:AT4G34881.1	0.999928
AT4G36980.4	miR773a	1571	6	0.43358	0.646068	no	NA	miR773a:AT4G36980.4	0.999928
AT4G37980.2	miR5630a	1064	6	0.515388	0.491038	no	ATCAD7	miR5630a:ATCAD7	0.999928
AT4G39330.2	miR841b-5p	348	6	0.53175	0.179306	no	ATCAD9	miR841b-5p:ATCAD9	0.999928
AT5G01530.1	miR5662	896	5.5	0.989872	0.120939	no	LHCB4.1	miR5662:LHCB4.1	0.999928
AT5G02560.2	miR857	532	5.5	0.834438	0.290374	no	HTA12	miR857:HTA12	0.999928
AT5G03630.1	miR856	577	6	0.196338	0.209739	no	ATMDAR2	miR856:ATMDAR2	0.999928
AT5G04170.1	miR773a	1048	6	0.237242	0.263831	no	NA	miR773a:AT5G04170.1	0.999928
AT5G07530.2	miR164b-3p	1497	5	7.32178	0.202992	no	ATGRP-7	miR164b-3p:ATGRP-7	0.999928
AT5G08690.1	miR3434-3p	385	6	0.482665	0.59376	no	NA	miR3434-3p:AT5G08690.1	0.999928
AT5G14740.5	miR159b-5p	1243	5.5	1.13713	0.255056	no	BETA CA2	miR159b-5p:BETA CA2	0.999928
AT5G15210.1	miR847	819	6	0.368134	0.652667	no	ATHB30	miR847:ATHB30	0.999928
AT5G15530.1	miR3434-3p	762	6	0.409038	0.524734	no	BCCP2	miR3434-3p:BCCP2	0.999928
AT5G20240.1	miR840-3p	402	6	1.00623	0.362114	no	PI	miR840-3p:PI	0.999928
AT5G21274.1	miR168b-3p	240	6	0.294507	0.399351	no	ACAM-6	miR168b-3p:ACAM-6	0.999928
AT5G27690.1	miR414	450	6	0.139073	0.665453	no	NA	miR414:AT5G27690.1	0.999928
AT5G27700.1	miR417	258	5.5	0.621738	0.191861	no	NA	miR417:AT5G27700.1	0.999928
AT5G38895.3	miR4240	654	6	1.12895	0.966575	no	NA	miR4240:AT5G38895.3	0.999928
AT5G46170.1	miR414	567	5.5	0.728088	0.488707	no	NA	miR414:AT5G46170.1	0.999928
AT5G47540.1	miR775	244	6	0.523569	0.723992	no	NA	miR775:AT5G47540.1	0.999928
AT5G53620.3	miR5632-5p	1867	6	0.286327	0.682937	no	NA	miR5632-5p:AT5G53620.3	0.999928
AT5G55130.2	miR866-3p	1289	6	0.253604	0.598031	no	CNX5	miR866-3p:CNX5	0.999928
AT5G59613.2	miR5021	495	6	0.466303	0.43798	no	NA	miR5021:AT5G59613.2	0.999928
AT5G60360.3	miR396b-5p	627	5.5	0.613557	0.268629	no	AALP	miR396b-5p:AALP	0.999928
AT5G60360.3	miR167a-5p	738	5.5	0.523569	0.31288	no	AALP	miR167a-5p:AALP	0.999928
AT5G62210.1	miR2112-5p	659	6	2.21699	0.48236	no	NA	miR2112-5p:AT5G62210.1	0.999928
AT5G63530.2	miR4221	68	6	1.5298	0.428166	no	ATFP3	miR4221:ATFP3	0.999928
AT5G65620.1	miR5021	98	5	0.850799	0.63153	no	NA	miR5021:AT5G65620.1	0.999928
AT5G65670.2	miR5998a	817	6	0.834438	0.26561	no	IAA9	miR5998a:IAA9	0.999928
ATCG00530.1	miR5016	262	5.5	2.68329	0.455597	no	YCF10	miR5016:YCF10	0.999928

## Sheet: xrn4-5 (biorep #1)
Target transcript	miRNA	miRNA slice site position in target transcript	Allen score of sRNA:target duplex	Slice site RPM	Slice site RPM + 1/Maximum adjacent site RPM + 1	Previously verified by 5' RACE?	Target gene common name	Interaction name	P-value adjusted for multiple testing
AT1G10120.1	miR396a-5p	1316	5.5	14.2884	7.26038	yes	NA	miR396a-5p:AT1G10120.1	0
AT1G27340.1	miR394a	1382	1	3.16881	2.26263	yes	LCR	miR394a:LCR	0
AT1G27360.4	miR156j	1309	0	2.89597	2.24893	no	SPL11	miR156j:SPL11	0
AT1G27370.4	miR156j	1324	0	0.928625	0.756057	no	SPL10	miR156j:SPL10	0
AT1G30330.2	miR167a-5p	3246	5	15.2218	5.6116	no	ARF6	miR167a-5p:ARF6	0
AT1G30490.1	miR165a-3p	805	3	8.36241	6.49996	yes	ATHB9	miR165a-3p:ATHB9	0
AT1G31280.1	miR403-3p	3232	1	11.1914	8.01142	yes	AGO2	miR403-3p:AGO2	0
AT1G50055.1	miR173-5p	373	4.5	14.3841	10.2383	yes	TAS1b	miR173-5p:TAS1b	0
AT1G66720.1	miR163	345	2	0.507393	1.50739	yes	NA	miR163:AT1G66720.1	0
AT1G68720.1	miR162a-3p	1007	5.5	2.46038	3.46038	no	ATTADA	miR162a-3p:ATTADA	0
AT1G72830.3	miR169h	1423	2.5	0.76109	1.76109	yes	ATHAP2C	miR169h:ATHAP2C	0
AT1G77850.1	miR160a-5p	1419	0.5	82.2025	83.2025	yes	ARF17	miR160a-5p:ARF17	0
AT2G22840.1	miR396a-5p	791	4	6.49559	7.49559	yes	AtGRF1	miR396a-5p:AtGRF1	0
AT2G28350.1	miR160a-5p	1339	2	137.48	138.48	yes	ARF10	miR160a-5p:ARF10	0
AT2G33770.1	miR399a	750	1.5	0.933412	1.93341	yes	ATUBC24	miR399a:ATUBC24	0
AT2G33810.1	miR156a-5p	796	1.5	21.5881	8.0954	yes	SPL3	miR156a-5p:SPL3	0
AT2G36400.1	miR396a-5p	756	4	8.87938	9.87938	yes	AtGRF3	miR396a-5p:AtGRF3	0
AT2G39675.1	miR173-5p	378	2.5	20.7505	21.7505	yes	TAS1c	miR173-5p:TAS1c	0
AT2G39681.1	miR173-5p	417	2.5	14.1161	15.1161	yes	TAS2	miR173-5p:TAS2	0
AT2G42200.1	miR156j	946	0	1.56047	1.08301	no	AtSPL9	miR156j:AtSPL9	0
AT2G45160.1	miR171a-3p	1013	0	102.211	8.92126	yes	ATHAM1	miR171a-3p:ATHAM1	0
AT3G52910.1	miR396a-5p	752	4	36.3025	23.693	yes	AtGRF4	miR396a-5p:AtGRF4	0
AT3G57230.2	miR824-5p	596	0.5	2.35507	2.27634	yes	AGL16	miR824-5p:AGL16	0
AT3G60630.1	miR171a-3p	1055	0	73.3949	6.69073	yes	ATHAM2	miR171a-3p:ATHAM2	0
AT3G62980.1	miR393a-5p	1721	2	9.72663	4.45588	yes	AtTIR1	miR393a-5p:AtTIR1	0
AT4G00150.1	miR171a-3p	866	0	48.2215	14.0302	yes	ATHAM3	miR171a-3p:ATHAM3	0
AT4G29900.1	miR391-5p	196	2.5	0.521753	1.08535	no	ACA10	miR391-5p:ACA10	0
AT4G30080.1	miR160a-5p	1518	2.5	33.8613	34.8613	yes	ARF16	miR160a-5p:ARF16	0
AT4G36920.2	miR172c	1303	1	1.86204	1.08531	yes	AP2	miR172c:AP2	0
AT5G12840.4	miR169b-5p	1129	3	3.90597	4.90597	yes	ATHAP2A	miR169b-5p:ATHAP2A	0
AT5G43270.3	miR156j	1111	0	9.07085	5.64186	yes	SPL2	miR156j:SPL2	0
AT5G50570.2	miR156j	976	0	1.37858	2.34491	no	SPL13	miR156j:SPL13	0
AT5G50670.1	miR156j	1111	0	1.37858	2.34491	no	SPL13	miR156j:SPL13	0
AT5G53950.1	miR164a	811	2.5	3.58047	4.58047	yes	ANAC098	miR164a:ANAC098	0
AT5G60120.2	miR172a	1820	1	4.34635	5.34635	yes	TOE2	miR172a:TOE2	0
AT3G15170.1	miR164a	674	2.5	1.98171	2.98171	yes	ANAC054	miR164a:ANAC054	0.00150594
AT2G34710.1	miR165a-3p	880	3	4.09744	3.20843	yes	ATHB-14	miR165a-3p:ATHB-14	0.00159041
AT1G52150.3	miR166a-3p	1278	3	2.8481	3.8481	yes	ATHB-15	miR166a-3p:ATHB-15	0.00320013
AT5G61430.1	miR164a	850	2.5	6.72535	3.15272	yes	ANAC100	miR164a:ANAC100	0.00551557
AT2G27400.1	miR173-5p	378	2.5	4.5091	5.5091	yes	TAS1a	miR173-5p:TAS1a	0.00705247
AT5G60690.1	miR165a-3p	1272	3	3.95862	2.42652	yes	IFL	miR165a-3p:IFL	0.0073525
AT1G06180.1	miR858a	402	3	9.14265	3.49707	yes	ATMYB13	miR858a:ATMYB13	0.00998561
AT3G05690.1	miR169d	1194	3	1.01479	2.01479	yes	ATHAP2B	miR169d:ATHAP2B	0.0247614
AT1G63400.1	miR161.2	999	2	2.25455	2.20099	yes	NA	miR161.2:AT1G63400.1	0.0248009
AT2G05170.1	miR390b-3p	701	3.5	1.60834	2.60834	no	ATVPS11	miR390b-3p:ATVPS11	0.0362681
AT1G12820.1	miR393a-5p	1894	4	5.15531	1.93396	yes	AFB3	miR393a-5p:AFB3	0.0397131
AT5G07680.2	miR164a	661	2.5	0.478673	1.07294	yes	ANAC079	miR164a:ANAC079	0.0433177
AT2G39020.1	miR414	909	2.5	1.32592	1.19414	no	NA	miR414:AT2G39020.1	0.0462115
AT3G11200.2	miR414	1081	2.5	2.21625	1.51361	no	AL2	miR414:AL2	0.0531593
AT1G51760.1	miR167a-5p	862	3	1.92905	1.75377	no	IAR3	miR167a-5p:IAR3	0.0562539
AT1G66230.1	miR858b	467	4	1.22062	2.22062	yes	AtMYB20	miR858b:AtMYB20	0.0926518
AT3G48960.1	miR5662	27	3.5	0.938199	1.9382	no	NA	miR5662:AT3G48960.1	0.0926518
AT1G53230.1	miR319c	1194	3.5	0.942985	1.94298	yes	TCP3	miR319c:TCP3	0.0969663
AT2G47460.1	miR858b	400	2.5	3.34592	0.385048	yes	ATMYB12	miR858b:ATMYB12	0.110084
AT5G06100.3	miR159a	1259	3.5	1.35943	1.55536	yes	ATMYB33	miR159a:ATMYB33	0.110084
AT1G25370.1	miR414	989	2.5	0.713222	0.648493	no	NA	miR414:AT1G25370.1	0.112479
AT3G61250.1	miR858a	604	4	1.30678	2.2014	no	AtMYB17	miR858a:AtMYB17	0.119919
AT5G55300.3	miR414	1024	2.5	0.550474	0.561457	no	MGO1	miR414:MGO1	0.126487
AT3G17185.2	miR390a-5p	863	4.5	1.79981	2.79981	yes	TAS3a	miR390a-5p:TAS3a	0.129036
AT3G49010.5	miR5662	83	3.5	5.17445	1.59462	no	ATBBC1	miR5662:ATBBC1	0.134837
AT1G15750.4	miR5028	2528	5.5	5.14095	2.83259	no	TPL	miR5028:TPL	0.135581
AT1G78420.2	miR166e-5p	993	4	1.41687	2.41687	no	NA	miR166e-5p:AT1G78420.2	0.140609
AT4G37740.1	miR396a-5p	920	4	1.34028	2.34028	yes	AtGRF2	miR396a-5p:AtGRF2	0.140609
AT4G24150.1	miR396a-5p	847	4	0.986066	1.98607	yes	AtGRF8	miR396a-5p:AtGRF8	0.141146
AT5G23730.1	miR414	1212	2.5	0.411659	0.406263	no	EFO2	miR414:EFO2	0.151609
AT1G79920.2	miR831-3p	1052	5	3.88682	3.7824	no	AtHsp70-15	miR831-3p:AtHsp70-15	0.156278
AT5G04810.1	miR414	2809	3	1.46953	1.37243	no	NA	miR414:AT5G04810.1	0.156278
AT5G37780.3	miR414	638	2.5	0.603128	0.36171	no	ACAM-1	miR414:ACAM-1	0.157339
AT3G11440.1	miR159a	1165	3.5	0.521753	1.19555	yes	ATMYB65	miR159a:ATMYB65	0.159089
AT3G44110.2	miR414	1237	2.5	0.478673	0.301992	no	ATJ	miR414:ATJ	0.159089
AT4G28450.1	miR847	1475	4	0.751516	1.75152	no	NA	miR847:AT4G28450.1	0.159089
AT2G39705.1	miR5016	97	4	1.21104	2.21104	no	DVL11	miR5016:DVL11	0.160999
AT5G43060.1	miR396b-5p	518	3	1.07223	0.852338	no	RD21B	miR396b-5p:RD21B	0.167992
AT1G48410.3	miR168a-5p	531	5	2.60877	2.20499	yes	AGO1	miR168a-5p:AGO1	0.17161
AT3G13480.1	miR414	312	4	1.4791	1.53269	no	NA	miR414:AT3G13480.1	0.17161
AT5G07350.2	miR5021	78	5	2.46995	3.46995	no	AtTudor1	miR5021:AtTudor1	0.172135
AT5G43310.4	miR5632-5p	1787	5	1.66578	2.66578	no	NA	miR5632-5p:AT5G43310.4	0.177141
AT2G45980.1	miR156b-3p	783	5	1.7663	2.7663	no	ATI1	miR156b-3p:ATI1	0.203728
AT1G34418.1	miR5628	200	5.5	4.80587	3.41751	no	NA	miR5628:AT1G34418.1	0.211266
AT3G61310.1	miR167d	1217	2.5	0.368578	0.371839	no	NA	miR167d:AT3G61310.1	0.214836
AT1G63130.1	miR161.2	1111	3	0.454739	1.45474	yes	TAS8	miR161.2:TAS8	0.225246
AT2G25760.2	miR773a	2002	4.5	1.4408	2.4408	no	NA	miR773a:AT2G25760.2	0.225246
AT4G02020.1	miR414	157	3.5	0.27763	1.27763	no	EZA1	miR414:EZA1	0.225246
AT5G18520.1	miR414	1334	3.5	2.54175	0.966052	no	Cand7	miR414:Cand7	0.231142
AT2G11910.2	miR414	502	3	2.1636	0.629492	no	NA	miR414:AT2G11910.2	0.249052
AT5G53660.1	miR396a-5p	539	4	0.378151	1.37815	yes	AtGRF7	miR396a-5p:AtGRF7	0.249052
AT4G39710.2	miR5021	163	2.5	1.02915	1.49311	no	FKBP16-2	miR5021:FKBP16-2	0.254242
AT3G14110.3	miR396b-5p	773	4.5	1.21104	2.21104	no	FLU	miR396b-5p:FLU	0.265637
AT3G45890.1	miR773b-3p	1629	4.5	0.780237	1.78024	no	RUS1	miR773b-3p:RUS1	0.273589
AT1G43710.1	miR865-3p	777	3.5	0.516967	1.10073	no	ATSDC1	miR865-3p:ATSDC1	0.278846
AT5G67180.1	miR172a	1308	3	0.473886	0.272509	yes	TOE3	miR172a:TOE3	0.286134
AT3G15500.1	miR837-5p	941	5	3.3172	2.05022	no	ANAC055	miR837-5p:ANAC055	0.306948
AT5G57735.1	miR390a-5p	428	4.5	0.560047	1.56005	yes	TAS3c	miR390a-5p:TAS3c	0.309263
AT5G53350.1	miR5658	1923	3	0.569621	0.634367	no	CLPX	miR5658:CLPX	0.309997
AT2G41900.1	miR5021	54	2	0.842464	0.33386	no	OXS2	miR5021:OXS2	0.312393
AT3G54140.1	miR414	1668	5	1.32592	2.32592	no	ATPTR1	miR414:ATPTR1	0.315403
AT5G16880.3	miR844-3p	1434	4	0.574407	1.57441	no	NA	miR844-3p:AT5G16880.3	0.325293
AT3G62610.1	miR858a	300	3.5	0.0143602	0.708944	no	ATMYB11	miR858a:ATMYB11	0.327203
AT5G46680.1	miR400	724	4	0.502606	1.50261	no	NA	miR400:AT5G46680.1	0.338588
AT1G08125.3	miR390a-3p	887	5	2.35028	1.97765	no	NA	miR390a-3p:AT1G08125.3	0.339868
AT1G79690.1	miR5660	1140	4	0.550474	1.55047	no	atnudt3	miR5660:atnudt3	0.376282
AT3G49000.1	miR158a-5p	517	5	0.890331	1.89033	no	NA	miR158a-5p:AT3G49000.1	0.377376
AT4G31630.1	miR5633	375	4.5	0.521753	1.52175	no	NA	miR5633:AT4G31630.1	0.377376
AT1G04950.3	miR396b-5p	1117	5	1.2254	2.2254	no	ATTAF6	miR396b-5p:ATTAF6	0.397717
AT3G01720.1	miR5024-3p	653	6	1.52697	2.52697	no	NA	miR5024-3p:AT3G01720.1	0.408918
AT3G22790.1	miR156c-3p	5200	6	3.52303	2.54069	no	NET1A	miR156c-3p:NET1A	0.409018
AT1G53280.1	miR5642a	1320	4.5	3.1736	1.45583	no	AtDJ1B	miR5642a:AtDJ1B	0.428112
AT1G12830.1	miR414	562	4	0.828104	0.799126	no	NA	miR414:AT1G12830.1	0.437028
AT3G25520.2	miR414	699	3.5	0.411659	0.308191	no	ATL5	miR414:ATL5	0.484051
AT5G14740.5	miR5658	1342	3.5	1.24455	0.544668	no	BETA CA2	miR5658:BETA CA2	0.484051
AT5G52060.1	miR160a-5p	602	4.5	1.02915	1.41819	no	ATBAG1	miR160a-5p:ATBAG1	0.484051
AT1G19870.1	miR4227	2242	4	1.4791	0.768515	no	iqd32	miR4227:iqd32	0.489343
AT2G34660.2	miR5648-5p	1379	4.5	1.14881	1.39886	no	ABCC2	miR5648-5p:ABCC2	0.489343
AT1G69670.1	miR858a	1751	4.5	0.703649	1.19069	no	ATCUL3B	miR858a:ATCUL3B	0.496928
AT5G07990.1	miR774b-5p	102	4	1.01957	0.822578	no	CYP75B1	miR774b-5p:CYP75B1	0.496928
AT5G37020.2	miR167c-5p	2379	3.5	2.25934	0.187842	yes	ARF8	miR167c-5p:ARF8	0.496928
AT2G47390.1	miR391-5p	1613	4.5	0.49782	1.49782	no	NA	miR391-5p:AT2G47390.1	0.504953
AT3G52230.1	miR414	512	4	0.986066	0.79651	no	NA	miR414:AT3G52230.1	0.536965
AT4G37470.1	miR860	1002	5	0.986066	1.98607	no	KAI2	miR860:KAI2	0.54173
AT4G38950.2	miR414	1661	5	1.11531	1.40776	no	NA	miR414:AT4G38950.2	0.545253
AT2G22080.1	miR414	598	4	1.369	0.585061	no	NA	miR414:AT2G22080.1	0.550762
AT3G11830.2	miR5021	1811	3	3.39858	0.790182	no	NA	miR5021:AT3G11830.2	0.550762
AT2G20290.1	miR413	782	5	0.359005	1.35901	no	ATXIG	miR413:ATXIG	0.555871
AT2G43710.2	miR157a-3p	517	5	2.4508	1.38394	no	FAB2	miR157a-3p:FAB2	0.555871
AT3G51880.4	miR414	542	4	1.18232	0.571381	no	AtHMGB1	miR414:AtHMGB1	0.555871
AT2G29700.1	miR831-3p	205	6	2.67099	2.50697	no	ATPH1	miR831-3p:ATPH1	0.576067
AT5G07410.1	miR5654-5p	1349	3.5	0.5409	0.339242	no	NA	miR5654-5p:AT5G07410.1	0.5781
AT1G10850.1	miR5021	251	3	0.440379	1.01007	no	NA	miR5021:AT1G10850.1	0.58355
AT1G01970.1	miR773b-3p	1248	5	0.76109	1.76109	no	NA	miR773b-3p:AT1G01970.1	0.586349
AT3G04730.1	miR391-3p	784	4.5	2.23061	1.20539	no	IAA16	miR391-3p:IAA16	0.586349
AT3G09840.1	miR847	1439	5	1.74237	1.60519	no	ATCDC48	miR847:ATCDC48	0.586349
AT4G28570.1	miR414	336	6	1.27327	2.27327	no	NA	miR414:AT4G28570.1	0.586349
AT4G36648.1	miR414	289	4	0.445166	0.650794	no	NA	miR414:AT4G36648.1	0.586349
AT4G24820.2	miR5636	1326	4.5	2.12052	0.864705	no	NA	miR5636:AT4G24820.2	0.589746
AT3G03130.1	miR837-5p	1065	6	1.4408	2.4408	no	NA	miR837-5p:AT3G03130.1	0.610149
AT1G22850.1	miR414	1074	4.5	0.646208	1.05848	no	NA	miR414:AT1G22850.1	0.642446
AT5G63520.1	miR157a-3p	439	5	0.488246	1.48825	no	NA	miR157a-3p:AT5G63520.1	0.651783
AT2G46330.2	miR156i	540	4	1.33071	1.23924	no	AGP16	miR156i:AGP16	0.655209
AT1G53070.1	miR833a-5p	666	5	0.516967	1.51697	no	NA	miR833a-5p:AT1G53070.1	0.668218
AT2G21170.2	miR5021	269	3	0.488246	0.751154	no	PDTPI	miR5021:PDTPI	0.668218
AT5G04590.1	miR172e-3p	376	4.5	0.483459	0.965723	no	SIR	miR172e-3p:SIR	0.668218
AT1G29930.1	miR842	223	4.5	5.58611	0.794446	no	AB140	miR842:AB140	0.674643
AT1G67230.1	miR838	1015	5	1.68493	1.1786	no	CRWN1	miR838:CRWN1	0.674643
AT1G67230.1	miR414	3610	4	0.473886	0.269645	no	CRWN1	miR414:CRWN1	0.674643
AT1G68720.1	miR5658	3992	5	1.2972	1.26655	no	ATTADA	miR5658:ATTADA	0.674643
AT1G74850.1	miR3440b-5p	2044	5.5	2.36464	1.4895	no	PDE343	miR3440b-5p:PDE343	0.674643
AT1G75000.1	miR5662	334	5	1.65142	1.38509	no	NA	miR5662:AT1G75000.1	0.674643
AT2G27050.1	miR172e-3p	160	6	1.81417	1.97344	no	AtEIL1	miR172e-3p:AtEIL1	0.674643
AT3G15980.5	miR394a	347	5.5	0.5409	1.5409	no	NA	miR394a:AT3G15980.5	0.674643
AT3G53090.2	miR5639-5p	2521	6	1.66099	1.72156	no	UPL7	miR5639-5p:UPL7	0.674643
AT3G55800.1	miR854a	344	4.5	2.54175	1.00543	no	SBPASE	miR854a:SBPASE	0.674643
AT3G63140.1	miR5021	237	3	0.981279	0.57655	no	CSP41A	miR5021:CSP41A	0.674643
AT4G17170.1	miR156c-3p	526	4.5	0.756303	0.7775	no	AT-RAB2	miR156c-3p:AT-RAB2	0.674643
AT4G27130.1	miR5632-3p	173	6	2.05351	1.80757	no	NA	miR5632-3p:AT4G27130.1	0.674643
AT5G51980.2	miR854a	324	5.5	0.564834	1.56483	no	NA	miR854a:AT5G51980.2	0.674643
AT1G15690.2	miR414	2086	4	0.756303	0.118591	no	AtAVP1	miR414:AtAVP1	0.68503
AT1G48160.1	miR782	883	4	0.76109	0.542712	no	NA	miR782:AT1G48160.1	0.68503
AT1G49760.2	miR8183	2090	5	4.23147	1.08326	no	PAB8	miR8183:PAB8	0.68503
AT2G47850.3	miR5021	138	4	1.13445	1.06192	no	NA	miR5021:AT2G47850.3	0.68503
AT4G28510.1	miR5644	760	5	1.31635	1.14967	no	ATPHB1	miR5644:ATPHB1	0.68503
AT2G31070.1	miR778	609	5	0.550474	1.55047	no	TCP10	miR778:TCP10	0.686718
AT3G15000.1	miR835-5p	686	5	0.871184	1.02089	no	RIP1	miR835-5p:RIP1	0.692199
AT4G00780.1	miR397b	720	4.5	1.53654	0.766975	no	NA	miR397b:AT4G00780.1	0.692199
AT5G26000.2	miR4227	851	4	0.354218	0.299722	no	AtTGG1	miR4227:AtTGG1	0.692199
AT5G64130.3	miR5021	119	3	0.378151	0.440291	no	NA	miR5021:AT5G64130.3	0.692199
AT1G62480.1	miR838	428	4	0.564834	0.229587	no	NA	miR838:AT1G62480.1	0.695869
AT3G55620.1	miR776	658	4.5	0.507393	0.993689	no	eIF6A	miR776:eIF6A	0.697758
AT3G06580.1	miR397a	1212	6	1.1536	2.1536	no	GAL1	miR397a:GAL1	0.708752
AT1G01320.2	miR857	3165	6	0.636635	1.63664	no	NA	miR857:AT1G01320.2	0.709426
AT2G15320.1	miR5021	44	5	1.12488	1.44169	no	NA	miR5021:AT2G15320.1	0.709426
AT3G03940.1	miR413	1223	6	0.560047	1.56005	no	NA	miR413:AT3G03940.1	0.709426
AT3G26570.2	miR5021	212	3	0.473886	0.39329	no	ORF02	miR5021:ORF02	0.709426
AT5G23940.1	miR3440b-3p	713	4.5	2.15403	0.689302	no	DCR	miR3440b-3p:DCR	0.709426
AT1G06960.3	miR5662	708	5	1.42166	1.1195	no	NA	miR5662:AT1G06960.3	0.709983
AT3G17860.3	miR5021	186	5	1.79024	1.93716	no	JAI3	miR5021:JAI3	0.716138
AT1G20696.3	miR414	569	4.5	1.97692	0.598619	no	HMGB3	miR414:HMGB3	0.723708
AT4G18390.2	miR159c	1137	4.5	0.603128	0.589724	no	TCP2	miR159c:TCP2	0.726934
AT2G41060.2	miR414	244	5	1.42166	0.942262	no	NA	miR414:AT2G41060.2	0.749404
AT1G20970.1	miR847	3798	5.5	1.64185	1.2405	no	NA	miR847:AT1G20970.1	0.751988
AT1G63000.1	miR780.1	315	4.5	0.382938	0.79173	no	NRS/ER	miR780.1:NRS/ER	0.754611
AT2G03220.1	miR774b-5p	852	5	0.473886	1.47389	no	ATFT1	miR774b-5p:ATFT1	0.754611
AT3G02360.2	miR859	1605	5	2.76194	1.32551	no	NA	miR859:AT3G02360.2	0.759954
AT4G00170.1	miR399b	557	6	0.574407	1.57441	no	NA	miR399b:AT4G00170.1	0.761449
AT1G48380.2	miR396a-5p	1173	6	4.18839	1.43202	no	HYP7	miR396a-5p:HYP7	0.776846
AT5G15530.1	miR3434-3p	762	6	2.08223	1.48397	no	BCCP2	miR3434-3p:BCCP2	0.776846
AT5G61440.1	miR396b-5p	718	5	1.05787	0.907158	no	ACHT5	miR396b-5p:ACHT5	0.776846
AT5G08139.1	miR4221	1225	5.5	0.5409	1.5409	no	NA	miR4221:AT5G08139.1	0.779838
AT1G23280.1	miR5645a	856	6	1.03393	2.03393	no	NA	miR5645a:AT1G23280.1	0.782585
AT1G07930.2	miR414	1061	4.5	0.210616	0.681864	no	NA	miR414:AT1G07930.2	0.786661
AT3G50690.1	miR414	898	5	0.828104	1.23233	no	NA	miR414:AT3G50690.1	0.786661
AT4G20070.1	miR8165	162	5.5	0.808957	1.80896	no	AAH	miR8165:AAH	0.786661
AT5G03670.1	miR859	1586	4.5	0.464313	0.742663	no	TRM28	miR859:TRM28	0.786661
AT5G12100.1	miR400	1728	5	0.397298	1.3973	no	NA	miR400:AT5G12100.1	0.786661
AT1G21590.1	miR5012	1509	5.5	0.962132	1.10217	no	NA	miR5012:AT1G21590.1	0.787677
AT1G27750.1	miR5662	2775	6	0.469099	1.4691	no	NA	miR5662:AT1G27750.1	0.787677
AT1G52880.1	miR4228-3p	863	5.5	2.03915	1.12791	no	ANAC018	miR4228-3p:ANAC018	0.787677
AT1G56450.1	miR172d-5p	637	4.5	0.435592	0.379677	no	PBG1	miR172d-5p:PBG1	0.787677
AT1G63000.1	miR396a-5p	683	4.5	0.459526	0.470607	no	NRS/ER	miR396a-5p:NRS/ER	0.787677
AT3G01230.1	miR859	541	6	1.74237	1.36436	no	NA	miR859:AT3G01230.1	0.787677
AT3G07460.2	miR413	824	6	8.06564	1.4103	no	NA	miR413:AT3G07460.2	0.787677
AT3G07810.2	miR390b-3p	1005	5	1.06744	0.901859	no	NA	miR390b-3p:AT3G07810.2	0.787677
AT3G14110.3	miR863-3p	490	5.5	0.478673	1.11155	no	FLU	miR863-3p:FLU	0.787677
AT3G21480.1	miR391-3p	3032	5	1.38336	0.790446	no	NA	miR391-3p:AT3G21480.1	0.787677
AT3G47000.1	miR2938	1129	6	0.545687	1.54569	no	NA	miR2938:AT3G47000.1	0.787677
AT3G54620.3	miR8175	165	5	0.545687	0.776394	no	ATBZIP25	miR8175:ATBZIP25	0.787677
AT4G35580.3	miR839-5p	1610	5.5	1.90512	1.11174	no	CBNAC	miR839-5p:CBNAC	0.787677
AT5G09550.1	miR824-3p	520	5.5	0.244123	1.24412	no	GDI	miR824-3p:GDI	0.787677
AT5G39570.1	miR842	438	5.5	1.66099	1.18807	no	NA	miR842:AT5G39570.1	0.787677
AT5G40450.1	miR829-5p	4048	6	0.454739	1.45474	no	NA	miR829-5p:AT5G40450.1	0.787677
AT5G41990.1	miR5021	397	5	0.904691	1.17063	no	ATWNK8	miR5021:ATWNK8	0.787677
AT5G41992.1	miR5021	397	5	0.904691	1.17063	no	CPuORF58	miR5021:CPuORF58	0.787677
AT5G60890.1	miR858a	638	4.5	0.0191469	0.462939	no	ATMYB34	miR858a:ATMYB34	0.787677
AT1G35620.1	miR157c-3p	1137	5.5	0.478673	1.08806	no	ATPDI8	miR157c-3p:ATPDI8	0.793644
AT1G07920.1	miR414	1280	4.5	0.325497	0.362017	no	NA	miR414:AT1G07920.1	0.794256
AT1G07940.2	miR414	1411	4.5	0.933412	0.629233	no	NA	miR414:AT1G07940.2	0.794447
AT5G26360.1	miR858a	1741	4.5	0.378151	0.668146	no	NA	miR858a:AT5G26360.1	0.799207
AT2G02160.1	miR838	1952	6	1.79981	1.36054	no	NA	miR838:AT2G02160.1	0.801589
AT1G79230.3	miR864-5p	1530	5	1.21583	1.21209	no	ATMST1	miR864-5p:ATMST1	0.804706
AT1G67580.2	miR2934-3p	2729	6	0.852037	1.85204	no	NA	miR2934-3p:AT1G67580.2	0.80478
AT3G45310.2	miR167a-5p	639	5.5	2.00085	1.12367	no	NA	miR167a-5p:AT3G45310.2	0.810173
AT1G12930.1	miR158a-5p	1949	6	0.832891	1.83289	no	NA	miR158a-5p:AT1G12930.1	0.813728
AT4G01690.2	miR170-3p	1412	5	0.856824	1.13787	no	HEMG1	miR170-3p:HEMG1	0.813728
AT4G30200.4	miR8171	1181	5.5	0.516967	1.51697	no	VEL1	miR8171:VEL1	0.813728
AT5G04560.2	miR172e-3p	4654	6	0.832891	1.83289	no	DME	miR172e-3p:DME	0.813728
AT5G45428.1	miR8175	1659	6	0.703649	1.70365	no	CPuORF24	miR8175:CPuORF24	0.813728
AT5G45430.2	miR8175	1711	6	0.703649	1.70365	no	NA	miR8175:AT5G45430.2	0.813728
AT5G51910.2	miR849	774	5.5	0.426019	1.42602	no	NA	miR849:AT5G51910.2	0.813728
AT1G53910.3	miR396a-5p	591	6	2.81938	1.283	no	RAP2.12	miR396a-5p:RAP2.12	0.817947
AT3G29075.1	miR414	867	4.5	0.354218	0.261976	no	NA	miR414:AT3G29075.1	0.817947
AT3G48670.2	miR865-3p	777	6	0.612701	1.30126	no	IDN2	miR865-3p:IDN2	0.817947
AT3G54540.1	miR838	2156	5.5	1.68014	1.02753	no	ABCF4	miR838:ABCF4	0.817947
AT4G02450.2	miR414	735	4.5	0.268057	0.213999	no	NA	miR414:AT4G02450.2	0.817947
AT5G08280.1	miR847	1357	4.5	0.813744	0.338038	no	HEMC	miR847:HEMC	0.817947
AT1G55330.1	miR414	96	4.5	1.07223	0.154561	no	AGP21	miR414:AGP21	0.818231
AT2G44060.2	miR414	1037	5.5	2.73801	0.97747	no	NA	miR414:AT2G44060.2	0.818329
AT2G36570.1	miR391-3p	1650	5	0.617488	0.675942	no	NA	miR391-3p:AT2G36570.1	0.823843
AT3G53310.1	miR824-3p	900	5	0.880758	0.725047	no	NA	miR824-3p:AT3G53310.1	0.823843
AT5G23670.2	miR2936	79	4.5	0.339858	0.48435	no	LCB2	miR2936:LCB2	0.823843
AT3G55620.1	miR5021	87	4	0.852037	0.588986	no	eIF6A	miR5021:eIF6A	0.830543
AT1G09840.6	miR840-3p	1478	5	0.52654	0.624201	no	AtHIR1	miR840-3p:AtHIR1	0.831045
AT2G24690.1	miR3434-5p	1249	6	0.344644	1.34464	no	NA	miR3434-5p:AT2G24690.1	0.831045
AT2G35680.1	miR8172	765	5.5	0.636635	0.968831	no	NA	miR8172:AT2G35680.1	0.831045
AT2G41620.1	miR169b-3p	1886	6	0.301564	1.30156	no	NA	miR169b-3p:AT2G41620.1	0.831045
AT3G16170.1	miR858a	1566	5.5	1.28284	0.944544	no	AAE13	miR858a:AAE13	0.831045
AT3G27810.1	miR858a	499	5	1.18711	0.644526	no	ATMYB21	miR858a:ATMYB21	0.831045
AT3G62900.1	miR414	2839	5	0.718009	0.623205	no	NA	miR414:AT3G62900.1	0.831045
AT4G17640.2	miR5640	1227	4.5	0.00478673	0.43378	no	CKB2	miR5640:CKB2	0.831045
AT5G12150.2	miR5021	2722	4	0.502606	0.550807	no	NA	miR5021:AT5G12150.2	0.831173
AT1G68010.2	miR5646	1243	5.5	4.17881	1.40524	no	ATHPR1	miR5646:ATHPR1	0.833095
AT4G02840.2	miR5021	84	6	1.3355	1.7878	no	NA	miR5021:AT4G02840.2	0.833095
AT5G65930.3	miR393a-3p	3734	6	0.694075	1.69407	no	KCBP	miR393a-3p:KCBP	0.833095
AT4G13540.1	miR156a-3p	297	5	0.536113	0.634322	no	NA	miR156a-3p:AT4G13540.1	0.833946
AT5G10400.1	miR414	488	5	1.24934	0.600979	no	NA	miR414:AT5G10400.1	0.833946
AT4G02440.1	miR5663-3p	957	5	0.847251	0.649779	no	EID1	miR5663-3p:EID1	0.840328
AT5G45670.1	miR167a-3p	1107	5	3.41772	0.5875	no	NA	miR167a-3p:AT5G45670.1	0.840328
AT2G36570.1	miR5021	111	5	0.435592	1.43559	no	NA	miR5021:AT2G36570.1	0.846488
AT3G28160.1	miR845a	382	5.5	0.909478	1.31259	no	NA	miR845a:AT3G28160.1	0.854773
AT4G34450.1	miR840-3p	1524	5.5	0.325497	1.3255	no	NA	miR840-3p:AT4G34450.1	0.854773
AT1G04680.1	miR156g	150	5	0.684502	0.794543	no	NA	miR156g:AT1G04680.1	0.856768
AT2G03150.1	miR847	3661	5.5	0.904691	0.836102	no	emb1579	miR847:emb1579	0.856768
AT5G52650.1	miR866-3p	155	5	1.97692	1.05425	no	NA	miR866-3p:AT5G52650.1	0.861267
AT3G48780.1	miR838	1726	5	0.536113	0.570092	no	ATSPT1	miR838:ATSPT1	0.86229
AT1G73840.1	miR778	367	6	0.689289	1.68929	no	ESP1	miR778:ESP1	0.87002
AT1G20330.1	miR831-3p	739	5	0.464313	0.733756	no	CVP1	miR831-3p:CVP1	0.883903
AT2G37340.3	miR2112-3p	419	5	0.607914	0.805714	no	AT-RS2Z33	miR2112-3p:AT-RS2Z33	0.883903
AT4G23100.3	miR865-3p	462	5.5	0.880758	0.837922	no	ATECS1	miR865-3p:ATECS1	0.884703
AT5G62700.1	miR774a	138	5	0.598341	0.589	no	TUB3	miR774a:TUB3	0.891456
AT1G09750.1	miR5021	69	5	0.832891	0.811405	no	NA	miR5021:AT1G09750.1	0.893477
AT5G58250.1	miR4245	718	5	0.885545	0.562802	no	EMB3143	miR4245:EMB3143	0.898886
AT1G14570.4	miR165a-5p	1170	5.5	0.51218	1.00318	no	NA	miR165a-5p:AT1G14570.4	0.899861
AT1G45688.2	miR1886.1	740	6	1.43602	1.42988	no	NA	miR1886.1:AT1G45688.2	0.899861
AT3G05530.1	miR414	408	5	0.464313	0.649616	no	ATS6A.2	miR414:ATS6A.2	0.899861
AT3G11170.1	miR5021	270	5.5	1.33071	1.31629	no	AtFAD7	miR5021:AtFAD7	0.899861
AT3G54290.1	miR5021	141	4	0.00478673	0.699911	no	NA	miR5021:AT3G54290.1	0.899861
AT4G13590.2	miR158a-5p	707	5.5	1.60355	1.19302	no	NA	miR158a-5p:AT4G13590.2	0.899861
AT5G54810.1	miR398a-5p	727	6	0.493033	1.49303	no	ATTSB1	miR398a-5p:ATTSB1	0.899861
AT2G01720.1	miR403-3p	849	6	1.11052	1.0138	no	NA	miR403-3p:AT2G01720.1	0.904384
AT1G33040.1	miR414	204	5	0.813744	0.485216	no	NACA5	miR414:NACA5	0.905578
AT1G62940.1	miR156i	659	5.5	0.722796	0.843057	no	ACOS5	miR156i:ACOS5	0.905578
AT2G04390.1	miR847	328	5	0.0909478	0.488124	no	NA	miR847:AT2G04390.1	0.905578
AT2G29960.2	miR5632-5p	378	5	0.521753	0.475267	no	ATCYP5	miR5632-5p:ATCYP5	0.905578
AT4G09670.1	miR415	1278	5	0.502606	0.721782	no	NA	miR415:AT4G09670.1	0.905578
AT5G56600.2	miR397b	138	5	0.320711	0.486692	no	PFN3	miR397b:PFN3	0.905578
AT1G07110.1	miR5640	2548	6	1.01957	1.37919	no	ATF2KP	miR5640:ATF2KP	0.906093
AT1G10200.1	miR394a	660	5	0.536113	0.574173	no	WLIM1	miR394a:WLIM1	0.906093
AT1G12270.1	miR5648-3p	891	5.5	0.536113	1.10312	no	Hop1	miR5648-3p:Hop1	0.906093
AT1G14920.1	miR169a-5p	660	6	0.406872	1.40687	no	GAI	miR169a-5p:GAI	0.906093
AT1G15860.3	miR829-5p	851	5	0.655782	0.410864	no	NA	miR829-5p:AT1G15860.3	0.906093
AT1G31580.1	miR5021	173	4	0.378151	0.413125	no	CXC750	miR5021:CXC750	0.906093
AT2G21330.3	miR5636	74	5	0.583981	0.512317	no	AtFBA1	miR5636:AtFBA1	0.906093
AT2G37770.2	miR5664	140	6	0.382938	1.38294	no	AKR4C9	miR5664:AKR4C9	0.906093
AT3G50690.1	miR156d-3p	663	6	0.416445	1.41644	no	NA	miR156d-3p:AT3G50690.1	0.906093
AT4G29130.1	miR3434-3p	415	5.5	0.607914	0.943806	no	ATHXK1	miR3434-3p:ATHXK1	0.906093
AT4G29670.2	miR169f-3p	704	6	2.10137	1.29865	no	ACHT2	miR169f-3p:ACHT2	0.906093
AT5G26230.1	miR5021	214	6	0.382938	1.38294	no	MAKR1	miR5021:MAKR1	0.906093
AT5G27990.1	miR414	543	6	1.03393	1.28795	no	NA	miR414:AT5G27990.1	0.906093
AT3G26430.1	miR859	2214	6	0.349431	1.34943	no	NA	miR859:AT3G26430.1	0.906903
AT1G75930.1	miR5021	178	4	1.37379	0.38179	no	EXL6	miR5021:EXL6	0.909009
AT1G44920.1	miR418	600	6	1.78545	0.949421	no	NA	miR418:AT1G44920.1	0.909372
AT1G66580.1	miR158a-5p	795	5	1.33071	0.505141	no	RPL10C	miR158a-5p:RPL10C	0.909372
AT4G39400.1	miR5021	209	5	1.17275	0.731041	no	ATBRI1	miR5021:ATBRI1	0.909372
AT4G16530.1	miR414	2242	6	0.770663	0.986663	no	NA	miR414:AT4G16530.1	0.909431
AT5G10200.1	miR847	2045	6	0.493033	0.951206	no	NA	miR847:AT5G10200.1	0.909431
AT5G45670.1	miR5014b	979	5.5	1.17753	0.795422	no	NA	miR5014b:AT5G45670.1	0.909431
AT5G09750.1	miR775	402	5.5	0.856824	0.908644	no	HEC3	miR775:HEC3	0.911221
AT1G68540.2	miR5028	1029	5.5	0.359005	0.913159	no	CCRL6	miR5028:CCRL6	0.913604
AT3G11120.1	miR831-3p	105	5	1.30199	0.239986	no	NA	miR831-3p:AT3G11120.1	0.913604
AT5G04170.1	miR773a	1048	6	0.832891	1.25171	no	NA	miR773a:AT5G04170.1	0.913604
AT5G04250.2	miR838	1302	6	3.02042	1.2317	no	NA	miR838:AT5G04250.2	0.913604
AT3G56490.1	miR5663-5p	197	5.5	1.09137	0.762614	no	HINT1	miR5663-5p:HINT1	0.916685
AT4G11790.1	miR2938	568	5.5	1.07223	0.686169	no	NA	miR2938:AT4G11790.1	0.917536
AT1G17470.2	miR5998a	187	6	0.550474	0.981814	no	ATDRG	miR5998a:ATDRG	0.919645
AT1G37130.1	miR390a-3p	1622	5.5	0.488246	0.647852	no	ATNR2	miR390a-3p:ATNR2	0.919645
AT1G62500.1	miR160c-3p	219	5	0.861611	0.465811	no	NA	miR160c-3p:AT1G62500.1	0.919645
AT4G28706.4	miR8165	821	6	1.01479	0.988262	no	NA	miR8165:AT4G28706.4	0.919645
AT5G03660.2	miR840-3p	491	5.5	1.05787	0.65147	no	NA	miR840-3p:AT5G03660.2	0.919645
AT5G42270.1	miR390b-3p	1256	5	0.382938	0.410437	no	FTSH5	miR390b-3p:FTSH5	0.919645
AT4G17090.1	miR5645a	1469	5	0.588767	0.389151	no	AtBAM3	miR5645a:AtBAM3	0.919909
AT1G19570.2	miR842	467	5	0.574407	0.15738	no	ATDHAR1	miR842:ATDHAR1	0.921452
AT1G62480.1	miR838	473	5.5	2.10616	0.779088	no	NA	miR838:AT1G62480.1	0.921452
AT1G64520.1	miR156i	907	6	1.08659	1.17842	no	RPN12a	miR156i:RPN12a	0.921452
AT2G05220.2	miR847	336	5	0.421232	0.236788	no	NA	miR847:AT2G05220.2	0.921452
AT2G22125.1	miR167a-3p	5198	6	0.603128	1.12044	no	CSI1	miR167a-3p:CSI1	0.921452
AT3G17820.1	miR851-5p	1014	5	1.23019	0.350069	no	ATGSKB6	miR851-5p:ATGSKB6	0.921452
AT3G56360.1	miR779.1	621	6	1.34986	1.2154	no	NA	miR779.1:AT3G56360.1	0.921452
AT4G01150.2	miR3440b-3p	252	5.5	2.28806	0.831702	no	NA	miR3440b-3p:AT4G01150.2	0.921452
AT4G29020.2	miR172b-5p	319	5.5	1.6945	0.817102	no	NA	miR172b-5p:AT4G29020.2	0.921452
AT5G07530.2	miR164b-3p	1497	5	1.13924	0.101573	no	ATGRP-7	miR164b-3p:ATGRP-7	0.921452
AT5G54160.1	miR5634	591	5.5	0.976492	0.842829	no	ATOMT1	miR5634:ATOMT1	0.924715
AT3G22440.1	miR166a-5p	1373	6	1.66099	1.0412	no	NA	miR166a-5p:AT3G22440.1	0.932004
AT3G29200.1	miR833a-5p	1182	6	1.48867	0.904333	no	ATCM1	miR833a-5p:ATCM1	0.933035
AT1G10670.4	miR162a-5p	939	5.5	1.20147	0.506002	no	ACLA-1	miR162a-5p:ACLA-1	0.936164
AT1G65295.1	miR854a	115	5	5.82545	0.451822	no	NA	miR854a:AT1G65295.1	0.936164
AT3G07410.1	miR158a-5p	557	6	0.636635	0.84233	no	AtRABA5b	miR158a-5p:AtRABA5b	0.939887
AT5G52840.1	miR838	281	5.5	1.06265	0.57925	no	NA	miR838:AT5G52840.1	0.939887
AT5G18600.1	miR414	204	5.5	0.373365	0.571638	no	NA	miR414:AT5G18600.1	0.94019
AT5G45960.1	miR5021	110	6	0.971706	0.806229	no	NA	miR5021:AT5G45960.1	0.94019
AT5G14740.5	miR159b-5p	1243	5.5	2.49867	0.556287	no	BETA CA2	miR159b-5p:BETA CA2	0.957558
AT5G53460.3	miR5014b	6850	5.5	1.13445	0.745779	no	GLT1	miR5014b:GLT1	0.95987
AT4G37590.1	miR827	1977	5.5	1.23976	0.567226	no	MEL1	miR827:MEL1	0.963643
AT5G67300.1	miR858b	359	6	0.516967	0.802488	no	ATMYB44	miR858b:ATMYB44	0.966048
AT2G17420.1	miR414	817	6	0.387725	1	no	ATNTRA	miR414:ATNTRA	0.968634
AT5G22630.1	miR8180	655	6	0.579194	1.00304	no	ADT5	miR8180:ADT5	0.968634
AT5G57020.1	miR3440b-5p	1483	6	1.04351	0.77633	no	ATNMT1	miR3440b-5p:ATNMT1	0.969814
AT1G63300.1	miR851-5p	1603	6	0.80417	0.77568	no	NA	miR851-5p:AT1G63300.1	0.969929
AT2G16600.2	miR773b-5p	405	5	1.16317	0.370445	no	ROC3	miR773b-5p:ROC3	0.969929
AT2G20280.1	miR774b-3p	402	6	0.588767	0.782972	no	NA	miR774b-3p:AT2G20280.1	0.969929
AT5G62560.1	miR156f-3p	1636	6	0.780237	0.732237	no	NA	miR156f-3p:AT5G62560.1	0.969929
AT1G76892.1	miR5021	77	6	0.995639	0.731537	no	NA	miR5021:AT1G76892.1	0.970879
AT4G17040.1	miR5021	177	5	0.344644	0.473783	no	CLPR4	miR5021:CLPR4	0.973849
AT5G60360.3	miR167a-5p	738	5.5	0.325497	0.659451	no	AALP	miR167a-5p:AALP	0.976501
AT5G01350.1	miR172b-5p	447	5.5	0.698862	0.526643	no	NA	miR172b-5p:AT5G01350.1	0.977062
AT5G12890.1	miR157a-3p	1453	5.5	0.842464	0.48852	no	NA	miR157a-3p:AT5G12890.1	0.977062
AT4G13930.1	miR414	1592	5.5	0.51218	0.588385	no	SHM4	miR414:SHM4	0.977653
AT3G15530.2	miR5021	41	6	0.938199	0.699436	no	NA	miR5021:AT3G15530.2	0.978056
AT4G39330.2	miR841b-5p	348	6	2.4508	0.697941	no	ATCAD9	miR841b-5p:ATCAD9	0.981879
AT1G01800.2	miR171c-5p	925	5.5	0.478673	0.38715	no	NA	miR171c-5p:AT1G01800.2	0.981964
AT1G06070.1	miR2938	208	6	0.990853	0.65404	no	NA	miR2938:AT1G06070.1	0.981964
AT1G10950.1	miR5024-5p	1797	5.5	0.727583	0.374813	no	AtTMN1	miR5024-5p:AtTMN1	0.981964
AT1G12080.2	miR838	461	5.5	0.5409	0.207429	no	NA	miR838:AT1G12080.2	0.981964
AT1G15340.2	miR773a	994	5.5	0.694075	0.263737	no	MBD10	miR773a:MBD10	0.981964
AT1G30230.2	miR5021	834	5	1.34507	0.366176	no	eEF-1Bb1	miR5021:eEF-1Bb1	0.981964
AT1G48920.1	miR414	1280	5.5	0.325497	0.290594	no	ATNUC-L1	miR414:ATNUC-L1	0.981964
AT1G50200.2	miR161.2	2577	5.5	0.258483	0.46213	no	ACD	miR161.2:ACD	0.981964
AT1G62940.1	miR859	1270	5.5	0.473886	0.399412	no	ACOS5	miR859:ACOS5	0.981964
AT1G64770.3	miR2111a-5p	848	6	0.488246	0.728279	no	NDF2	miR2111a-5p:NDF2	0.981964
AT1G71170.1	miR4227	481	6	0.382938	0.655259	no	NA	miR4227:AT1G71170.1	0.981964
AT1G75180.3	miR414	1321	5.5	0.105308	0.376744	no	NA	miR414:AT1G75180.3	0.981964
AT1G75630.2	miR5658	743	5.5	0.545687	0.524282	no	AVA-P4	miR5658:AVA-P4	0.981964
AT1G77440.2	miR867	451	5.5	0.5409	0.500708	no	PBC2	miR867:PBC2	0.981964
AT2G16600.2	miR414	538	5.5	1.25412	0.27364	no	ROC3	miR414:ROC3	0.981964
AT2G20890.1	miR838	906	5.5	0.785023	0.357911	no	PSB29	miR838:PSB29	0.981964
AT2G30010.1	miR156g	1152	6	0.478673	0.610603	no	TBL45	miR156g:TBL45	0.981964
AT2G37040.1	miR406	1537	5.5	0.488246	0.354149	no	ATPAL1	miR406:ATPAL1	0.981964
AT2G44440.1	miR847	339	6	0.0670142	0.571697	no	AtEML4	miR847:AtEML4	0.981964
AT3G01390.2	miR837-5p	470	5.5	0.29199	0.245171	no	AVMA10	miR837-5p:AVMA10	0.981964
AT3G04290.1	miR5661	669	5.5	2.24976	0.360948	no	ATLTL1	miR5661:ATLTL1	0.981964
AT3G15020.2	miR827	680	5.5	0.382938	0.424924	no	mMDH2	miR827:mMDH2	0.981964
AT3G46030.1	miR4243	261	5.5	0.244123	0.325332	no	HTB11	miR4243:HTB11	0.981964
AT4G04640.1	miR5021	1310	6	0.919052	0.640523	no	ATPC1	miR5021:ATPC1	0.981964
AT4G09650.1	miR159b-3p	88	5.5	0.521753	0.266948	no	ATPD	miR159b-3p:ATPD	0.981964
AT4G16720.1	miR5644	520	5.5	0.449952	0.356823	no	NA	miR5644:AT4G16720.1	0.981964
AT4G18030.1	miR166e-5p	2047	6	1.99128	0.565576	no	NA	miR166e-5p:AT4G18030.1	0.981964
AT4G20440.4	miR5633	960	6	0.971706	0.604054	no	smB	miR5633:smB	0.981964
AT4G24770.1	miR854a	1111	5.5	1.46474	0.459368	no	ATRBP31	miR854a:ATRBP31	0.981964
AT4G30210.2	miR5021	103	5	0.406872	0.162211	no	AR2	miR5021:AR2	0.981964
AT5G01530.1	miR5662	896	5.5	2.87682	0.2666	no	LHCB4.1	miR5662:LHCB4.1	0.981964
AT5G12370.3	miR840-3p	1749	6	0.416445	0.558416	no	SEC10	miR840-3p:SEC10	0.981964
AT5G19850.1	miR5020a	185	6	0.560047	0.719592	no	NA	miR5020a:AT5G19850.1	0.981964
AT5G30510.1	miR167a-5p	616	6	0.909478	0.722781	no	ARRPS1	miR167a-5p:ARRPS1	0.981964
AT5G33370.2	miR5663-3p	133	5.5	2.02957	0.368633	no	NA	miR5663-3p:AT5G33370.2	0.981964
AT5G38650.1	miR866-3p	315	6	0.660568	0.646123	no	NA	miR866-3p:AT5G38650.1	0.981964
AT5G38660.2	miR866-3p	1157	6	0.660568	0.646123	no	APE1	miR866-3p:APE1	0.981964
AT5G39320.1	miR5645a	1515	5.5	0.919052	0.418964	no	UDG4	miR5645a:UDG4	0.981964
AT5G40950.1	miR841a-3p	261	5.5	0.55526	0.378283	no	RPL27	miR841a-3p:RPL27	0.981964
AT5G43960.2	miR847	1450	6	0.866398	0.640342	no	NA	miR847:AT5G43960.2	0.981964
AT5G45960.1	miR2934-5p	706	6	0.373365	0.588039	no	NA	miR2934-5p:AT5G45960.1	0.981964
AT5G58770.1	miR837-5p	720	5.5	0.478673	0.323158	no	AtcPT4	miR837-5p:AtcPT4	0.981964
AT5G60340.1	miR397b	369	6	0.732369	0.72686	no	AAK6	miR397b:AAK6	0.981964
AT5G63530.2	miR4221	68	6	1.45995	0.590762	no	ATFP3	miR4221:ATFP3	0.981964
AT4G02600.2	miR829-5p	1722	6	0.306351	0.985556	no	ATMLO1	miR829-5p:ATMLO1	0.985335
AT4G35090.2	miR169a-3p	957	6	1.57962	0.726381	no	CAT2	miR169a-3p:CAT2	0.985335
AT5G20890.1	miR5663-5p	866	6	0.411659	0.715958	no	NA	miR5663-5p:AT5G20890.1	0.985335
AT5G49100.1	miR5021	1170	6	0.416445	0.873123	no	NA	miR5021:AT5G49100.1	0.985335
AT5G56910.1	miR5017-5p	775	6	0.622275	0.882786	no	NA	miR5017-5p:AT5G56910.1	0.985335
AT5G61130.1	miR5021	106	5	0.636635	0.541932	no	PDCB1	miR5021:PDCB1	0.985335
AT5G64310.1	miR417	426	6	1.33071	0.744614	no	AGP1	miR417:AGP1	0.985335
AT1G19830.1	miR5020a	305	6	0.416445	0.732614	no	NA	miR5020a:AT1G19830.1	0.987439
AT1G75860.1	miR5013	737	6	0.349431	0.71386	no	NA	miR5013:AT1G75860.1	0.987439
AT2G04570.1	miR1888b	104	6	1.64663	0.690352	no	NA	miR1888b:AT2G04570.1	0.987439
AT1G72020.1	miR5651	278	6	1.06744	0.659496	no	NA	miR5651:AT1G72020.1	0.995652
AT3G01500.3	miR5024-3p	748	6	3.3555	0.496159	no	ATBCA1	miR5024-3p:ATBCA1	0.996266
AT3G45090.2	miR858a	2074	6	0.172322	0.49889	no	NA	miR858a:AT3G45090.2	0.996266
AT1G06760.1	miR834	682	6	0.713222	0.274912	no	NA	miR834:AT1G06760.1	0.999994
AT1G30230.2	miR5665	662	6	0.449952	0.435899	no	eEF-1Bb1	miR5665:eEF-1Bb1	0.999994
AT1G52300.1	miR778	330	6	3.30763	0.506162	no	NA	miR778:AT1G52300.1	0.999994
AT2G04570.1	miR774b-3p	984	6	0.411659	0.211723	no	NA	miR774b-3p:AT2G04570.1	0.999994
AT2G10940.2	miR862-5p	726	6	0.363791	0.0948784	no	NA	miR862-5p:AT2G10940.2	0.999994
AT2G39730.3	miR863-5p	420	6	0.971706	0.56666	no	RCA	miR863-5p:RCA	0.999994
AT3G08520.1	miR831-3p	29	6	1.61791	0.480626	no	NA	miR831-3p:AT3G08520.1	0.999994
AT3G10060.1	miR390a-5p	697	6	0.607914	0.44615	no	NA	miR390a-5p:AT3G10060.1	0.999994
AT3G14210.1	miR859	1044	6	0.521753	0.464842	no	ESM1	miR859:ESM1	0.999994
AT3G50820.1	miR782	1083	6	0.564834	0.206135	no	OEC33	miR782:OEC33	0.999994
AT3G56020.1	miR831-3p	71	6	3.11137	0.44737	no	NA	miR831-3p:AT3G56020.1	0.999994
AT3G61580.1	miR5021	1144	6	0.378151	0.37154	no	AtSLD1	miR5021:AtSLD1	0.999994
AT3G62250.1	miR838	281	6	0.454739	0.373396	no	UBQ5	miR838:UBQ5	0.999994
AT4G02940.1	miR8172	1827	6	0.378151	0.493074	no	NA	miR8172:AT4G02940.1	0.999994
AT4G07990.2	miR173-5p	1191	6	0.387725	0.303282	no	NA	miR173-5p:AT4G07990.2	0.999994
AT4G17090.1	miR5998a	1652	6	1.40251	0.325723	no	AtBAM3	miR5998a:AtBAM3	0.999994
AT4G27430.2	miR5661	700	6	0.411659	0.388598	no	CIP7	miR5661:CIP7	0.999994
AT4G30960.1	miR842	378	6	0.564834	0.473845	no	ATCIPK6	miR842:ATCIPK6	0.999994
AT5G23730.1	miR396a-5p	836	6	1.369	0.316053	no	EFO2	miR396a-5p:EFO2	0.999994
AT5G62210.1	miR2112-5p	659	6	0.966919	0.424973	no	NA	miR2112-5p:AT5G62210.1	0.999994

## Sheet: xrn4-5 (biorep #2)
Target transcript	miRNA	miRNA slice site position in target transcript	Allen score of sRNA:target duplex	Slice site RPM	Slice site RPM + 1/Maximum adjacent site RPM + 1	Previously verified by 5' RACE?	Target gene common name	Interaction name	P-value adjusted for multiple testing
AT1G02860.2	miR827	268	1	0.790571	0.996002	yes	BAH1	miR827:BAH1	0
AT1G10120.1	miR396a-5p	1316	5.5	6.5258	7.5258	yes	NA	miR396a-5p:AT1G10120.1	0
AT1G12820.1	miR393a-5p	1894	4	10.4571	4.48877	yes	AFB3	miR393a-5p:AFB3	0
AT1G17590.4	miR169h	1515	2.5	0.632457	1.63246	yes	NF-YA8	miR169h:NF-YA8	0
AT1G27360.4	miR156j	1309	0	4.62124	1.28824	no	SPL11	miR156j:SPL11	0
AT1G27370.4	miR156j	1324	0	2.04111	1.75475	no	SPL10	miR156j:SPL10	0
AT1G30490.1	miR165a-3p	805	3	10.0115	11.0115	yes	ATHB9	miR165a-3p:ATHB9	0
AT1G31280.1	miR403-3p	3232	1	9.83182	5.19452	yes	AGO2	miR403-3p:AGO2	0
AT1G33120.1	miR5630a	309	0	0.352163	0.537327	no	NA	miR5630a:AT1G33120.1	0
AT1G33140.1	miR5630a	309	0	0.330602	0.550782	no	PGY2	miR5630a:PGY2	0
AT1G50055.1	miR173-5p	373	4.5	24.2705	25.2705	yes	TAS1b	miR173-5p:TAS1b	0
AT1G52150.3	miR166a-3p	1278	3	5.4765	6.4765	yes	ATHB-15	miR166a-3p:ATHB-15	0
AT1G54160.1	miR169h	1294	1.5	0.62527	1.62527	yes	NF-YA5	miR169h:NF-YA5	0
AT1G69170.1	miR156j	1306	0	2.38609	3.2239	yes	SPL6	miR156j:SPL6	0
AT1G72830.3	miR169h	1423	2.5	2.73106	1.8732	yes	ATHAP2C	miR169h:ATHAP2C	0
AT1G77850.1	miR160a-5p	1419	0.5	60.6727	61.6727	yes	ARF17	miR160a-5p:ARF17	0
AT2G02850.1	miR408-3p	107	1	0.589334	0.853361	yes	ARPN	miR408-3p:ARPN	0
AT2G22840.1	miR396a-5p	791	4	6.89234	7.89234	yes	AtGRF1	miR396a-5p:AtGRF1	0
AT2G27400.1	miR173-5p	378	2.5	13.8925	14.8925	yes	TAS1a	miR173-5p:TAS1a	0
AT2G28350.1	miR160a-5p	1339	2	144.868	80.1773	yes	ARF10	miR160a-5p:ARF10	0
AT2G33770.1	miR399f	839	1	0.812132	1.81213	yes	ATUBC24	miR399f:ATUBC24	0
AT2G33770.1	miR399e	896	1	0.790571	1.79057	yes	ATUBC24	miR399e:ATUBC24	0
AT2G33810.1	miR156a-5p	796	1.5	5.49806	1.57477	yes	SPL3	miR156a-5p:SPL3	0
AT2G36400.1	miR396a-5p	756	4	17.7591	18.7591	yes	AtGRF3	miR396a-5p:AtGRF3	0
AT2G39675.1	miR173-5p	378	2.5	45.0553	46.0553	yes	TAS1c	miR173-5p:TAS1c	0
AT2G39681.1	miR173-5p	417	2.5	16.2714	17.2714	yes	TAS2	miR173-5p:TAS2	0
AT2G45160.1	miR171a-3p	1013	0	151.617	14.735	yes	ATHAM1	miR171a-3p:ATHAM1	0
AT2G46800.2	miR856	435	2	0.409659	1.40966	no	ATCDF1	miR856:ATCDF1	0
AT3G11440.1	miR159a	1165	3.5	6.01552	7.01552	yes	ATMYB65	miR159a:ATMYB65	0
AT3G17185.2	miR390a-5p	863	4.5	10.5936	11.5936	yes	TAS3a	miR390a-5p:TAS3a	0
AT3G19890.1	miR774a	799	1	0.539025	1.53903	yes	NA	miR774a:AT3G19890.1	0
AT3G28040.1	miR867	2916	6	3.56475	4.56475	no	NA	miR867:AT3G28040.1	0
AT3G52910.1	miR396a-5p	752	4	65.5814	66.5814	yes	AtGRF4	miR396a-5p:AtGRF4	0
AT3G57230.2	miR824-5p	596	0.5	0.682766	1.68277	yes	AGL16	miR824-5p:AGL16	0
AT3G57920.1	miR156j	854	0	0.790571	1.74053	yes	SPL15	miR156j:SPL15	0
AT3G60630.1	miR171a-3p	1055	0	97.1468	7.34148	yes	ATHAM2	miR171a-3p:ATHAM2	0
AT3G61310.1	miR167d	1217	2.5	1.80394	0.443775	no	NA	miR167d:AT3G61310.1	0
AT3G62980.1	miR393a-5p	1721	2	11.6861	4.57125	yes	AtTIR1	miR393a-5p:AtTIR1	0
AT4G00150.1	miR171a-3p	866	0	76.2469	19.7525	yes	ATHAM3	miR171a-3p:ATHAM3	0
AT4G03190.1	miR393a-5p	1597	3	5.20339	6.20339	yes	AFB1	miR393a-5p:AFB1	0
AT4G30080.1	miR160a-5p	1518	2.5	25.8517	26.8517	yes	ARF16	miR160a-5p:ARF16	0
AT4G36920.2	miR172c	1303	1	7.26606	3.92351	yes	AP2	miR172c:AP2	0
AT4G37740.1	miR396a-5p	920	4	8.50223	9.50223	yes	AtGRF2	miR396a-5p:AtGRF2	0
AT5G06100.3	miR159a	1259	3.5	4.51344	5.51344	yes	ATMYB33	miR159a:ATMYB33	0
AT5G07680.2	miR164a	661	2.5	11.147	12.147	yes	ANAC079	miR164a:ANAC079	0
AT5G20670.1	miR8175	466	2.5	0.546212	0.833423	no	NA	miR8175:AT5G20670.1	0
AT5G24890.1	miR414	772	1	0.539025	0.506073	no	NA	miR414:AT5G24890.1	0
AT5G27660.1	miR5657	1534	0	1.00618	0.00526837	no	DEG14	miR5657:DEG14	0
AT5G37020.2	miR167a-5p	2380	4	24.4646	9.24765	yes	ARF8	miR167a-5p:ARF8	0
AT5G39610.1	miR164c-5p	780	3	1.19304	1.45902	no	ANAC092	miR164c-5p:ANAC092	0
AT5G39740.2	miR414	997	1.5	1.58833	0.405499	no	OLI7	miR414:OLI7	0
AT5G43270.3	miR156j	1111	0	3.57194	1.12963	yes	SPL2	miR156j:SPL2	0
AT5G43740.2	miR472-3p	642	1	0.797758	1.79776	yes	NA	miR472-3p:AT5G43740.2	0
AT5G50570.2	miR156j	976	0	0.826506	1.42663	no	SPL13	miR156j:SPL13	0
AT5G50670.1	miR156j	1111	0	0.826506	1.42663	no	SPL13	miR156j:SPL13	0
AT5G60120.2	miR172a	1820	1	0.948685	1.94869	yes	TOE2	miR172a:TOE2	0
AT3G15270.1	miR156i	654	2	2.17766	3.17766	yes	SPL5	miR156i:SPL5	0.00125547
AT4G32880.1	miR165a-3p	944	3	2.35015	3.35015	no	ATHB-8	miR165a-3p:ATHB-8	0.00134062
AT1G06180.1	miR858a	402	3	5.8071	6.8071	yes	ATMYB13	miR858a:ATMYB13	0.00259114
AT5G61430.1	miR164a	850	2.5	6.89953	3.51006	yes	ANAC100	miR164a:ANAC100	0.0029737
AT5G53950.1	miR164a	811	2.5	2.22078	3.22078	yes	ANAC098	miR164a:ANAC098	0.00318997
AT2G34710.1	miR165a-3p	880	3	7.51042	2.90131	yes	ATHB-14	miR165a-3p:ATHB-14	0.00339837
AT4G24150.1	miR396a-5p	847	4	3.73006	4.73006	yes	AtGRF8	miR396a-5p:AtGRF8	0.00643028
AT5G60690.1	miR165a-3p	1272	3	3.02573	2.25735	yes	IFL	miR165a-3p:IFL	0.00719599
AT4G21400.1	miR866-3p	2174	2	1.2146	2.2146	no	CRK28	miR866-3p:CRK28	0.00738652
AT5G04980.2	miR414	683	2	0.546212	1.54621	no	NA	miR414:AT5G04980.2	0.00738652
AT2G47460.1	miR858a	401	3	3.75162	2.18097	yes	ATMYB12	miR858a:ATMYB12	0.0175085
AT5G06510.3	miR169d	1239	3	0.848067	1.84807	yes	NF-YA10	miR169d:NF-YA10	0.0177601
AT3G26810.1	miR393a-5p	2009	4	10.7086	3.48002	yes	AFB2	miR393a-5p:AFB2	0.0245319
AT4G18390.2	miR319a	1136	2.5	2.65919	1.34288	yes	TCP2	miR319a:TCP2	0.0248461
AT5G53660.1	miR396a-5p	539	4	2.22078	3.22078	yes	AtGRF7	miR396a-5p:AtGRF7	0.0248461
AT1G27340.1	miR394a	1382	1	0.539025	0.390666	yes	LCR	miR394a:LCR	0.0257871
AT1G20230.1	miR866-3p	2252	4.5	3.00417	4.00417	no	NA	miR866-3p:AT1G20230.1	0.0293898
AT1G04530.1	miR414	809	2.5	0.589334	0.736789	no	TPR4	miR414:TPR4	0.0324302
AT3G43590.1	miR5658	1673	4	1.83269	2.83269	no	NA	miR5658:AT3G43590.1	0.034748
AT5G37780.3	miR414	638	2.5	1.15711	0.500117	no	ACAM-1	miR414:ACAM-1	0.0362146
AT5G23730.1	miR414	1212	2.5	1.52365	0.456537	no	EFO2	miR414:EFO2	0.0376346
AT1G69770.1	miR823	2036	2.5	0.57496	0.990956	yes	CMT3	miR823:CMT3	0.0384064
AT5G67180.1	miR172a	1308	3	2.64482	2.55951	yes	TOE3	miR172a:TOE3	0.0387956
AT5G13640.1	miR5658	2565	2	2.64482	1.27698	no	ATPDAT	miR5658:ATPDAT	0.0446397
AT1G72880.2	miR773a	206	4.5	1.91893	2.91893	no	NA	miR773a:AT1G72880.2	0.052197
AT3G23690.1	miR393a-5p	416	3	1.16429	1.04512	yes	NA	miR393a-5p:AT3G23690.1	0.052197
AT4G38360.2	miR5658	215	2	0.869628	1.11581	no	LAZ1	miR5658:LAZ1	0.0586189
AT2G45480.1	miR396a-5p	524	4	1.33678	2.33678	yes	AtGRF9	miR396a-5p:AtGRF9	0.0605052
AT5G03330.2	miR5658	187	3	0.848067	1.84807	no	NA	miR5658:AT5G03330.2	0.0605052
AT1G48410.3	miR168a-5p	531	5	4.62843	3.03378	yes	AGO1	miR168a-5p:AGO1	0.0609891
AT1G53230.1	miR319c	1194	3.5	1.68176	1.60739	yes	TCP3	miR319c:TCP3	0.0654247
AT5G57735.1	miR390a-5p	428	4.5	1.89018	2.89018	yes	TAS3c	miR390a-5p:TAS3c	0.0753252
AT1G51760.1	miR167a-5p	862	3	1.29366	1.26572	no	IAR3	miR167a-5p:IAR3	0.0754664
AT3G20910.1	miR169a-5p	1045	4	0.998994	1.99899	yes	NF-YA9	miR169a-5p:NF-YA9	0.0774997
AT1G76900.2	miR774b-5p	642	3.5	1.48052	2.48052	no	AtTLP1	miR774b-5p:AtTLP1	0.0916637
AT3G09200.2	miR5662	663	3.5	3.88098	1.43236	no	NA	miR5662:AT3G09200.2	0.0922945
AT5G60910.2	miR159b-5p	196	3.5	0.725888	1.72589	no	AGL8	miR159b-5p:AGL8	0.0943893
AT2G41640.2	miR854a	311	4	1.18586	2.18586	no	NA	miR854a:AT2G41640.2	0.0944449
AT5G03650.1	miR2111a-5p	2043	3.5	0.955872	1.95587	no	SBE2.2	miR2111a-5p:SBE2.2	0.0981204
AT4G33680.1	miR5665	738	5	2.46514	3.46514	no	AGD2	miR5665:AGD2	0.119037
AT2G17900.1	miR8166	1519	4	0.711514	1.71151	no	ASHR1	miR8166:ASHR1	0.127324
AT3G28430.1	miR2938	340	4.5	2.27828	2.03507	no	NA	miR2938:AT3G28430.1	0.143864
AT1G63080.1	miR161.2	1027	4	0.783384	1.78338	yes	NA	miR161.2:AT1G63080.1	0.147877
AT3G06540.1	miR156b-3p	1929	5	1.16429	2.16429	no	AthREP	miR156b-3p:AthREP	0.147877
AT4G03510.2	miR5662	911	4.5	1.38709	2.38709	no	ATRMA1	miR5662:ATRMA1	0.147877
AT1G30330.2	miR167c-5p	3245	3	2.06986	0.457255	no	ARF6	miR167c-5p:ARF6	0.153411
AT4G23680.1	miR5658	557	2	0.596521	0.444155	no	NA	miR5658:AT4G23680.1	0.15423
AT4G08310.1	miR414	1506	4.5	1.39428	2.39428	no	NA	miR414:AT4G08310.1	0.156979
AT5G04810.1	miR414	2809	3	0.531838	0.501341	no	NA	miR414:AT5G04810.1	0.159227
AT1G12070.1	miR414	109	4	1.56677	1.49971	no	NA	miR414:AT1G12070.1	0.159847
AT1G63130.1	miR161.2	1111	3	0.488716	1.48872	yes	TAS8	miR161.2:TAS8	0.165598
AT1G12830.1	miR414	562	4	3.97441	1.76954	no	NA	miR414:AT1G12830.1	0.179745
AT3G27200.1	miR398a-3p	268	5.5	3.96004	2.67351	no	NA	miR398a-3p:AT3G27200.1	0.190699
AT3G28970.1	miR5025	672	5	1.37991	2.37991	no	AAR3	miR5025:AAR3	0.190699
AT1G50620.1	miR1886.3	2065	4	0.589334	1.58933	no	NA	miR1886.3:AT1G50620.1	0.197533
AT5G39660.2	miR414	342	3.5	0.725888	0.8109	no	CDF2	miR414:CDF2	0.201534
AT2G19540.1	miR414	429	4	1.95487	1.24535	no	NA	miR414:AT2G19540.1	0.204874
AT4G12690.2	miR5021	1060	4	3.3204	2.74318	no	NA	miR5021:AT4G12690.2	0.207549
AT1G71030.1	miR858a	342	4.5	1.22179	2.22179	no	ATMYBL2	miR858a:ATMYBL2	0.222564
AT2G35690.1	miR2934-3p	1907	4	1.72488	1.31127	no	ACX5	miR2934-3p:ACX5	0.227262
AT1G60670.2	miR837-5p	1076	5	2.44358	2.10945	no	NA	miR837-5p:AT1G60670.2	0.244716
AT5G40380.1	miR865-3p	932	4.5	0.69714	1.69714	no	CRK42	miR865-3p:CRK42	0.24675
AT2G38610.2	miR775	911	4.5	1.883	2.14353	no	NA	miR775:AT2G38610.2	0.247995
AT3G49010.5	miR5662	83	3.5	1.58114	0.623355	no	ATBBC1	miR5662:ATBBC1	0.25044
AT3G25520.2	miR414	699	3.5	1.70332	0.614468	no	ATL5	miR414:ATL5	0.268676
AT5G01850.1	miR173-3p	943	5.5	1.45896	2.45896	no	NA	miR173-3p:AT5G01850.1	0.274309
AT1G52827.1	miR1887	256	3.5	0.804945	1.13566	no	ATCDT1	miR1887:ATCDT1	0.284795
AT5G38970.3	miR393a-3p	1289	5.5	1.81113	2.81113	no	ATBR6OX	miR393a-3p:ATBR6OX	0.286476
AT3G14930.3	miR831-3p	573	4	0.776197	0.964863	no	HEME1	miR831-3p:HEME1	0.291
AT1G54020.3	miR869.1	792	4	1.45896	1.48023	no	NA	miR869.1:AT1G54020.3	0.312378
AT4G09460.1	miR858a	353	4	1.4374	1.36124	no	AtMYB6	miR858a:AtMYB6	0.332682
AT1G48960.1	miR8180	221	5	0.869628	1.86963	no	NA	miR8180:AT1G48960.1	0.33836
AT1G06040.2	miR1886.1	706	3.5	0.783384	0.692859	no	BBX24	miR1886.1:BBX24	0.357099
AT1G33240.1	miR5658	123	3	1.14273	0.336827	no	AT-GTL1	miR5658:AT-GTL1	0.357099
AT2G39770.2	miR773b-3p	378	4	0.754636	1.12955	no	CYT1	miR773b-3p:CYT1	0.357099
AT5G05930.2	miR5658	1131	4	0.618083	1.61808	no	ATGC1	miR5658:ATGC1	0.357099
AT5G28300.1	miR5016	607	3.5	0.682766	0.523639	no	NA	miR5016:AT5G28300.1	0.357099
AT4G00730.2	miR5635a	829	5	0.76901	1.76901	no	AHDP	miR5635a:AHDP	0.365675
AT5G65060.2	miR2112-3p	717	5	3.4857	1.72825	no	AGL70	miR2112-3p:AGL70	0.365675
AT5G60890.1	miR858b	637	5.5	2.90355	1.98125	no	ATMYB34	miR858b:ATMYB34	0.377877
AT3G14610.1	miR447a-3p	1595	6	1.57395	2.57395	no	CYP72A7	miR447a-3p:CYP72A7	0.388268
AT1G12930.1	miR158a-5p	1949	6	1.68895	2.68895	no	NA	miR158a-5p:AT1G12930.1	0.388804
AT5G43300.1	miR414	1204	6	1.55958	2.55958	no	AtGDPD3	miR414:AtGDPD3	0.391325
AT3G29075.1	miR414	489	5.5	2.26391	2.30364	no	NA	miR414:AT3G29075.1	0.395701
AT1G27460.1	miR2112-5p	270	5	0.725888	1.72589	no	NPGR1	miR2112-5p:NPGR1	0.402939
AT1G53910.3	miR396a-5p	591	6	3.47132	2.2861	no	RAP2.12	miR396a-5p:RAP2.12	0.404817
AT1G13245.1	miR859	490	4.5	0.589334	1.58933	no	DVL4	miR859:DVL4	0.405076
AT4G18190.1	miR159b-3p	1235	4.5	1.75363	1.5317	no	ATPUP6	miR159b-3p:ATPUP6	0.422301
AT4G21100.1	miR169f-3p	1247	6	1.6027	2.6027	no	DDB1B	miR169f-3p:DDB1B	0.422301
AT2G18560.1	miR5638a	759	5	0.646831	1.64683	no	NA	miR5638a:AT2G18560.1	0.426583
AT1G73760.1	miR5022	834	5	1.89737	1.45991	no	NA	miR5022:AT1G73760.1	0.428722
AT2G32235.1	miR5021	412	5	1.32241	2.32241	no	NA	miR5021:AT2G32235.1	0.429654
AT2G32240.1	miR5021	4034	5	1.32241	2.32241	no	NA	miR5021:AT2G32240.1	0.429654
AT2G19400.1	miR824-3p	1502	5	0.855254	1.85525	no	NA	miR824-3p:AT2G19400.1	0.435958
AT2G11910.2	miR414	442	4	0.833693	0.626664	no	NA	miR414:AT2G11910.2	0.451102
AT3G47220.1	miR3440b-3p	1546	4.5	0.21561	1.21561	no	ATPLC9	miR3440b-3p:ATPLC9	0.451762
AT5G64080.2	miR854a	151	5.5	2.23516	1.78528	no	AtXYP1	miR854a:AtXYP1	0.459143
AT1G20640.2	miR829-5p	2375	6	1.36553	2.36553	no	NA	miR829-5p:AT1G20640.2	0.46384
AT1G53290.1	miR156g	966	5	1.64582	1.59271	no	NA	miR156g:AT1G53290.1	0.46384
AT1G69690.1	miR5021	742	5	0.718701	1.7187	no	AtTCP15	miR5021:AtTCP15	0.46384
AT2G41560.1	miR773a	1521	6	1.768	1.95364	no	ACA4	miR773a:ACA4	0.46384
AT3G03330.1	miR396b-5p	968	5.5	1.17867	2.17867	no	NA	miR396b-5p:AT3G03330.1	0.471866
AT3G04790.1	miR396a-5p	213	4.5	0.826506	0.927045	no	EMB3119	miR396a-5p:EMB3119	0.498071
AT2G47900.3	miR5013	1440	4.5	0.711514	0.944475	no	AtTLP3	miR5013:AtTLP3	0.499805
AT3G11250.1	miR5662	764	4	0.316228	0.717802	no	NA	miR5662:AT3G11250.1	0.502888
AT1G31240.1	miR842	790	5.5	0.970246	1.97025	no	NA	miR842:AT1G31240.1	0.504136
AT3G11830.2	miR5021	1811	3	0.689953	0.873672	no	NA	miR5021:AT3G11830.2	0.504136
AT5G12250.1	miR774a	171	6	2.95386	1.87033	no	TUB6	miR774a:TUB6	0.505232
AT5G65540.1	miR5645a	1799	4	0.596521	0.921207	no	NA	miR5645a:AT5G65540.1	0.513751
AT3G51880.4	miR414	542	4	0.91275	0.475131	no	AtHMGB1	miR414:AtHMGB1	0.515996
AT2G23520.1	miR167a-3p	588	5.5	0.675579	1.67558	no	NA	miR167a-3p:AT2G23520.1	0.518115
AT5G56910.1	miR5662	452	4.5	0.337789	1.33779	no	NA	miR5662:AT5G56910.1	0.519811
AT4G18120.2	miR870-3p	844	5.5	0.725888	1.72589	no	AML3	miR870-3p:AML3	0.536834
AT5G04590.1	miR172e-3p	376	4.5	0.804945	0.890126	no	SIR	miR172e-3p:SIR	0.536834
AT1G20960.2	miR414	893	4.5	0.553399	0.821387	no	emb1507	miR414:emb1507	0.54669
AT5G02030.1	miR5021	83	4	0.654018	1.65402	no	BLH9	miR5021:BLH9	0.549991
AT3G10360.1	miR157c-3p	2664	6	1.38709	2.38709	no	APUM4	miR157c-3p:APUM4	0.553141
AT2G27110.3	miR8177	2645	6	0.57496	1.57496	no	FRS3	miR8177:FRS3	0.564032
AT1G29930.1	miR842	223	4.5	5.27526	0.767839	no	AB140	miR842:AB140	0.576184
AT1G61180.2	miR472-3p	687	4.5	0.251545	0.759972	no	NA	miR472-3p:AT1G61180.2	0.576184
AT3G26932.2	miR5658	1270	5	1.18586	1.31016	no	DRB3	miR5658:DRB3	0.595576
AT2G30870.1	miR830-5p	385	5	0.898376	1.60924	no	ATGSTF10	miR830-5p:ATGSTF10	0.595809
AT5G57460.1	miR5021	348	4	0.646831	1.00881	no	NA	miR5021:AT5G57460.1	0.60055
AT5G50840.2	miR782	1038	5.5	1.05649	2.05649	no	NA	miR782:AT5G50840.2	0.611822
AT5G61940.1	miR414	1429	6	0.689953	1.68995	no	NA	miR414:AT5G61940.1	0.614019
AT1G70700.2	miR5021	98	4	2.11298	1.00232	no	JAZ9	miR5021:JAZ9	0.61601
AT1G08125.3	miR390a-3p	887	5	0.98462	0.965052	no	NA	miR390a-3p:AT1G08125.3	0.621724
AT5G26000.2	miR4227	851	4	2.0483	0.430976	no	AtTGG1	miR4227:AtTGG1	0.631407
AT1G20770.1	miR780.2	104	4.5	1.39428	0.733562	no	NA	miR780.2:AT1G20770.1	0.643184
AT1G24793.2	miR861-3p	671	5	0.905563	1.09953	no	AtLpxC1	miR861-3p:AtLpxC1	0.643184
AT1G25054.2	miR861-3p	934	5	0.905563	1.09953	no	AtLpxC3	miR861-3p:AtLpxC3	0.643184
AT1G25145.1	miR861-3p	654	5	0.905563	1.09953	no	AtLpxC4	miR861-3p:AtLpxC4	0.643184
AT1G25210.2	miR861-3p	789	5	0.905563	1.09953	no	AtLpxC5	miR861-3p:AtLpxC5	0.643184
AT1G61310.1	miR472-3p	552	4.5	0.488716	0.635126	no	NA	miR472-3p:AT1G61310.1	0.643184
AT3G15450.3	miR2933a	170	5.5	3.0976	1.2694	no	NA	miR2933a:AT3G15450.3	0.655189
AT4G38600.2	miR160a-5p	2900	5	0.467155	1.46715	no	KAK	miR160a-5p:KAK	0.661356
AT2G36990.1	miR390a-3p	1611	5	0.57496	0.897599	no	ATSIG6	miR390a-3p:ATSIG6	0.668215
AT1G78880.1	miR5021	1998	3.5	0.567773	0.858345	no	NA	miR5021:AT1G78880.1	0.677059
AT1G78882.1	miR5021	1998	3.5	0.567773	0.858345	no	CPuORF56	miR5021:CPuORF56	0.677059
AT1G70780.1	miR172d-5p	414	4	0.833693	0.652297	no	NA	miR172d-5p:AT1G70780.1	0.682898
AT1G70782.1	miR172d-5p	414	4	0.833693	0.652297	no	CPuORF28	miR172d-5p:CPuORF28	0.682898
AT5G45940.2	miR1886.3	538	5.5	1.53802	1.39504	no	AtNUDT11	miR1886.3:AtNUDT11	0.683849
AT3G02360.2	miR859	1605	5	1.56677	0.93703	no	NA	miR859:AT3G02360.2	0.69013
AT5G42520.3	miR5658	561	5	0.905563	1.12758	no	ATBPC6	miR5658:ATBPC6	0.69013
AT1G54030.1	miR4240	690	5.5	0.84088	1.18507	no	ERMO3	miR4240:ERMO3	0.696267
AT4G29700.1	miR774a	462	6	1.96205	1.57221	no	NA	miR774a:AT4G29700.1	0.702434
AT3G62660.1	miR5021	461	4	0.668392	0.853017	no	GATL7	miR5021:GATL7	0.702441
AT4G28660.2	miR157d	158	5	1.30804	1.05938	no	PSB28	miR157d:PSB28	0.702441
AT5G14910.1	miR5647	548	5	1.04212	1.39189	no	NA	miR5647:AT5G14910.1	0.704208
AT2G41820.1	miR5021	233	4	0.610896	0.820605	no	NA	miR5021:AT2G41820.1	0.704488
AT3G01500.3	miR5658	1200	4	0.934311	0.31547	no	ATBCA1	miR5658:ATBCA1	0.704488
AT3G07760.2	miR172d-5p	266	4.5	0.323415	0.6717	no	NA	miR172d-5p:AT3G07760.2	0.704488
AT5G04280.1	miR414	455	4.5	0.517464	0.531651	no	AtRZ-1c	miR414:AtRZ-1c	0.704488
AT5G28290.1	miR172a	264	6	0.546212	1.54621	no	ATNEK3	miR172a:ATNEK3	0.704488
AT5G52010.1	miR414	1340	5.5	0.632457	1.63246	no	NA	miR414:AT5G52010.1	0.70524
AT3G11120.1	miR831-3p	105	5	2.36452	0.808336	no	NA	miR831-3p:AT3G11120.1	0.709123
AT1G58290.1	miR2934-3p	253	5.5	1.20742	1.2737	no	AtHEMA1	miR2934-3p:AtHEMA1	0.724911
AT3G14560.1	miR824-5p	294	4.5	0.661205	0.54625	no	NA	miR824-5p:AT3G14560.1	0.724911
AT1G07930.2	miR414	1061	4.5	0.0718701	0.613391	no	NA	miR414:AT1G07930.2	0.725008
AT1G08845.2	miR774b-5p	416	5.5	0.804945	1.80495	no	NA	miR774b-5p:AT1G08845.2	0.725008
AT1G12270.1	miR5648-3p	891	5.5	0.596521	1.59652	no	Hop1	miR5648-3p:Hop1	0.725008
AT3G19420.1	miR773a	325	6	0.833693	1.83369	no	ATPEN2	miR773a:ATPEN2	0.725008
AT3G53130.1	miR3440b-5p	1489	5	1.43021	1.13417	no	CYP97C1	miR3440b-5p:CYP97C1	0.725008
AT1G69670.1	miR858b	1750	5.5	0.610896	1.6109	no	ATCUL3B	miR858b:ATCUL3B	0.727828
AT3G16840.1	miR5998a	1285	5	0.848067	1.18969	no	NA	miR5998a:AT3G16840.1	0.727828
AT1G72250.2	miR5998a	2805	6	0.596521	1.59652	no	NA	miR5998a:AT1G72250.2	0.730243
AT5G38060.2	miR1886.1	119	6	1.73207	1.50766	no	NA	miR1886.1:AT5G38060.2	0.730243
AT3G46820.1	miR2937	447	5	0.553399	0.903822	no	TOPP5	miR2937:TOPP5	0.733738
AT5G62700.1	miR774a	138	5	1.0493	0.8383	no	TUB3	miR774a:TUB3	0.733738
AT3G52560.4	miR5652	453	4.5	0.84088	0.534583	no	MMZ4	miR5652:MMZ4	0.73744
AT4G34110.1	miR4243	473	5.5	1.38709	1.14476	no	ATPAB2	miR4243:ATPAB2	0.745496
AT4G38600.2	miR5021	5771	5	1.87581	1.06098	no	KAK	miR5021:KAK	0.745496
AT1G07920.1	miR414	1280	4.5	0.158114	0.374622	no	NA	miR414:AT1G07920.1	0.747169
AT5G17550.1	miR847	180	5	0.754636	0.774705	no	AtPEX19-2	miR847:AtPEX19-2	0.747169
AT5G23610.2	miR5021	130	4	0.69714	0.728511	no	NA	miR5021:AT5G23610.2	0.747169
AT1G07940.2	miR414	1411	4.5	0.201236	0.34381	no	NA	miR414:AT1G07940.2	0.748304
AT1G15180.2	miR170-5p	1619	5.5	1.59552	1.08732	no	NA	miR170-5p:AT1G15180.2	0.748304
AT1G23240.3	miR5021	569	3.5	3.11916	0.374567	no	NA	miR5021:AT1G23240.3	0.748304
AT3G16640.1	miR414	276	4.5	1.55958	0.313189	no	TCTP	miR414:TCTP	0.748304
AT4G34180.1	miR5021	828	4	0.704327	0.685099	no	NA	miR5021:AT4G34180.1	0.748304
AT5G12850.1	miR2934-3p	659	5.5	0.848067	1.13708	no	NA	miR2934-3p:AT5G12850.1	0.748304
AT5G23670.2	miR2936	79	4.5	0.409659	0.620421	no	LCB2	miR2936:LCB2	0.748304
AT5G15948.1	miR5021	1625	3.5	0.747449	0.342383	no	CPuORF10	miR5021:CPuORF10	0.753293
AT5G15950.2	miR5021	1704	3.5	0.747449	0.342383	no	NA	miR5021:AT5G15950.2	0.753293
AT4G34588.1	miR1886.1	540	4.5	0.812132	0.55766	no	CPuORF2	miR1886.1:CPuORF2	0.754591
AT4G34590.1	miR1886.1	540	4.5	0.812132	0.55766	no	ATB2	miR1886.1:ATB2	0.754591
AT1G55330.1	miR414	96	4.5	2.02674	0.238049	no	AGP21	miR414:AGP21	0.754866
AT4G17090.1	miR5645a	1469	5	2.78137	0.875236	no	AtBAM3	miR5645a:AtBAM3	0.754866
AT4G34990.1	miR858a	378	5	0.725888	0.745453	no	AtMYB32	miR858a:AtMYB32	0.754866
AT3G49590.3	miR1886.1	1563	5.5	0.747449	1.74745	no	ATG13	miR1886.1:ATG13	0.762664
AT1G20090.1	miR5021	124	4	1.2721	0.981375	no	ARAC4	miR5021:ARAC4	0.766077
AT2G41620.1	miR169b-3p	1886	6	0.69714	1.69714	no	NA	miR169b-3p:AT2G41620.1	0.766077
AT3G13410.1	miR8167a	253	6	0.646831	1.64683	no	NA	miR8167a:AT3G13410.1	0.766077
AT3G50690.1	miR156d-3p	663	6	0.797758	1.79776	no	NA	miR156d-3p:AT3G50690.1	0.766077
AT4G21850.2	miR5021	22	6	0.747449	1.74745	no	ATMSRB9	miR5021:ATMSRB9	0.766077
AT5G10750.1	miR852	696	5.5	0.50309	1.50309	no	NA	miR852:AT5G10750.1	0.766077
AT5G22000.3	miR2937	305	5.5	0.589334	1.58933	no	RHF2A	miR2937:RHF2A	0.766077
AT5G52430.1	miR5021	1568	5	0.733075	1.59547	no	NA	miR5021:AT5G52430.1	0.766077
AT3G09840.1	miR847	1439	5	1.02774	0.698123	no	ATCDC48	miR847:ATCDC48	0.76793
AT3G54620.3	miR8175	165	5	0.848067	0.710058	no	ATBZIP25	miR8175:ATBZIP25	0.76793
AT3G57880.1	miR4239	2118	5.5	0.488716	1.48872	no	NA	miR4239:AT3G57880.1	0.771628
AT3G25410.1	miR774b-5p	289	5.5	0.596521	1.59652	no	NA	miR774b-5p:AT3G25410.1	0.784866
AT1G12520.3	miR398a-3p	820	6	1.89737	1.64453	no	ATCCS	miR398a-3p:ATCCS	0.789378
AT3G20050.1	miR5645a	1735	4.5	0.567773	0.392239	no	ATTCP-1	miR5645a:ATTCP-1	0.797172
AT1G62310.1	miR5650	492	5.5	0.682766	0.987349	no	NA	miR5650:AT1G62310.1	0.800555
AT1G14920.1	miR169a-5p	660	6	0.991807	1.14929	no	GAI	miR169a-5p:GAI	0.801239
AT1G30530.1	miR773a	584	6	2.16329	1.2054	no	UGT78D1	miR773a:UGT78D1	0.801239
AT1G55960.1	miR5021	373	4	0.639644	0.603323	no	NA	miR5021:AT1G55960.1	0.801239
AT3G56150.2	miR838	1477	5	0.488716	0.670053	no	ATEIF3C-1	miR838:ATEIF3C-1	0.801239
AT4G00630.2	miR1886.2	1581	5	0.639644	0.66486	no	ATKEA2	miR1886.2:ATKEA2	0.801239
AT5G43330.1	miR171c-5p	640	5.5	0.783384	1.04199	no	c-NAD-MDH2	miR171c-5p:c-NAD-MDH2	0.801239
AT1G49010.1	miR5658	914	5	0.35935	0.787624	no	NA	miR5658:AT1G49010.1	0.810193
AT2G36380.1	miR5657	4278	6	0.704327	1.70433	no	ABCG34	miR5657:ABCG34	0.81265
AT3G06470.1	miR397a	780	5	0.582147	0.827158	no	NA	miR397a:AT3G06470.1	0.81265
AT3G13060.2	miR5015	1239	6	0.668392	1.66839	no	ECT5	miR5015:ECT5	0.81265
AT4G19640.1	miR156f-3p	742	5.5	1.18586	1.13851	no	ARA-7	miR156f-3p:ARA-7	0.81265
AT4G37980.2	miR5012	810	5	0.610896	0.791622	no	ATCAD7	miR5012:ATCAD7	0.81265
AT3G52560.4	miR414	784	6	3.52163	1.17785	no	MMZ4	miR414:MMZ4	0.814527
AT1G15000.1	miR5661	869	5.5	0.884002	1.323	no	scpl50	miR5661:scpl50	0.817817
AT2G23350.1	miR854a	2192	5.5	1.22898	1.35943	no	PAB4	miR854a:PAB4	0.830272
AT4G31580.2	miR157a-3p	269	6	0.531838	1.53184	no	At-RSZ22	miR157a-3p:At-RSZ22	0.83456
AT1G19660.2	miR414	506	6	0.948685	1.12909	no	NA	miR414:AT1G19660.2	0.836504
AT1G64520.1	miR156i	907	6	2.23516	1.49479	no	RPN12a	miR156i:RPN12a	0.836655
AT2G36060.3	miR414	299	5.5	1.02774	1.02918	no	MMZ3	miR414:MMZ3	0.837365
AT1G02500.2	miR858b	966	5	0.596521	0.638078	no	AtSAM1	miR858b:AtSAM1	0.844162
AT1G49760.2	miR8183	2090	5	0.57496	0.667826	no	PAB8	miR8183:PAB8	0.844162
AT1G74020.1	miR5021	73	4	0.0646831	0.544352	no	SS2	miR5021:SS2	0.844162
AT2G38110.1	miR8178	876	5	2.28547	0.777264	no	ATGPAT6	miR8178:ATGPAT6	0.844162
AT3G56020.1	miR831-3p	71	6	5.97959	1.1573	no	NA	miR831-3p:AT3G56020.1	0.848799
AT4G26630.2	miR847	2389	6	1.6602	1.07244	no	NA	miR847:AT4G26630.2	0.848799
AT1G31580.1	miR5021	173	4	2.08423	0.527108	no	CXC750	miR5021:CXC750	0.848986
AT1G01610.1	miR774b-5p	330	5.5	1.44459	1.17233	no	ATGPAT4	miR774b-5p:ATGPAT4	0.851996
AT2G38020.2	miR397a	460	6	0.488716	1.48872	no	EMB258	miR397a:EMB258	0.85629
AT4G24770.1	miR854a	1111	5.5	2.09142	1.15897	no	ATRBP31	miR854a:ATRBP31	0.85629
AT3G55620.1	miR5021	87	4	0.661205	0.473511	no	eIF6A	miR5021:eIF6A	0.858664
AT1G09450.1	miR5023	1965	5.5	0.618083	0.845946	no	AtHaspin	miR5023:AtHaspin	0.859052
AT1G68720.1	miR162a-3p	1007	5.5	0.618083	0.789578	no	ATTADA	miR162a-3p:ATTADA	0.859052
AT1G10670.4	miR162a-5p	939	5.5	1.04212	0.780305	no	ACLA-1	miR162a-5p:ACLA-1	0.859944
AT2G38610.2	miR4221	680	5.5	1.4374	0.830941	no	NA	miR4221:AT2G38610.2	0.859944
AT3G55410.1	miR394a	654	6	0.797758	1.06379	no	NA	miR394a:AT3G55410.1	0.859944
AT4G35840.1	miR866-3p	799	5	0.675579	0.621476	no	NA	miR866-3p:AT4G35840.1	0.859944
AT3G03030.1	miR4243	48	5.5	0.812132	1.0723	no	NA	miR4243:AT3G03030.1	0.867743
AT4G01080.1	miR838	572	5	0.539025	0.533828	no	TBL26	miR838:TBL26	0.867743
AT5G07530.2	miR164b-3p	1497	5	12.5341	0.595149	no	ATGRP-7	miR164b-3p:ATGRP-7	0.867743
AT1G07320.4	miR865-3p	595	5	0.589334	0.521384	no	EMB2784	miR865-3p:EMB2784	0.868477
AT4G19110.3	miR164c-3p	1176	5	0.474342	0.496539	no	NA	miR164c-3p:AT4G19110.3	0.868477
AT4G19112.1	miR164c-3p	2260	5	0.474342	0.496539	no	CPuORF25	miR164c-3p:CPuORF25	0.868477
AT2G20890.1	miR838	906	5.5	1.41584	0.77785	no	PSB29	miR838:PSB29	0.869821
AT3G03020.2	miR5021	224	5	0.00718701	1.00719	no	NA	miR5021:AT3G03020.2	0.871468
AT5G47560.1	miR840-3p	1259	5.5	0.639644	0.962048	no	ATSDAT	miR840-3p:ATSDAT	0.871468
AT5G01530.1	miR5662	896	5.5	2.32859	0.77172	no	LHCB4.1	miR5662:LHCB4.1	0.878385
AT5G16500.1	miR847	1913	5.5	0.740262	0.737918	no	NA	miR847:AT5G16500.1	0.878385
AT5G50920.1	miR173-3p	1539	5	0.704327	0.45417	no	ATHSP93-V	miR173-3p:ATHSP93-V	0.878385
AT3G02468.1	miR854a	813	5	2.33578	0.720558	no	CPuORF9	miR854a:CPuORF9	0.880246
AT3G02470.4	miR854a	866	5	2.33578	0.720558	no	SAMDC	miR854a:SAMDC	0.880246
AT1G26920.1	miR3434-3p	78	6	1.09961	1.07349	no	NA	miR3434-3p:AT1G26920.1	0.883797
AT4G04630.1	miR5641	302	6	0.452781	1.45278	no	NA	miR5641:AT4G04630.1	0.885825
AT5G53460.3	miR5014b	6850	5.5	0.452781	0.841759	no	GLT1	miR5014b:GLT1	0.885825
AT5G27850.1	miR396b-5p	541	5	2.22078	0.373717	no	NA	miR396b-5p:AT5G27850.1	0.886325
AT1G27400.1	miR773a	591	5	1.26491	0.364686	no	NA	miR773a:AT1G27400.1	0.893954
AT1G75930.1	miR5021	178	4	1.02055	0.116214	no	EXL6	miR5021:EXL6	0.893954
AT4G05180.1	miR8171	365	5.5	2.35015	0.827751	no	PSBQ	miR8171:PSBQ	0.893954
AT1G10950.1	miR5024-5p	1797	5.5	1.35834	0.764645	no	AtTMN1	miR5024-5p:AtTMN1	0.896279
AT3G28830.1	miR854a	1623	5	0.582147	0.58063	no	NA	miR854a:AT3G28830.1	0.896279
AT3G26430.1	miR859	2214	6	0.201236	1.20124	no	NA	miR859:AT3G26430.1	0.905472
AT5G62690.1	miR774a	179	5	0.524651	0.386313	no	TUB2	miR774a:TUB2	0.905472
AT3G08520.1	miR831-3p	29	6	3.46414	1.19418	no	NA	miR831-3p:AT3G08520.1	0.90587
AT4G26230.1	miR398a-3p	115	5.5	0.618083	0.752625	no	NA	miR398a-3p:AT4G26230.1	0.907885
AT1G67720.1	miR780.1	2930	5	0.582147	0.373663	no	NA	miR780.1:AT1G67720.1	0.911891
AT2G38730.1	miR394b-3p	191	5	0.812132	0.462524	no	NA	miR394b-3p:AT2G38730.1	0.911891
AT4G20300.2	miR5016	920	6	1.1068	1.19095	no	NA	miR5016:AT4G20300.2	0.911891
AT4G27580.1	miR822-5p	654	6	0.57496	0.943999	no	NA	miR822-5p:AT4G27580.1	0.91797
AT1G09420.2	miR169b-5p	1470	6	0.596521	0.902494	no	G6PD4	miR169b-5p:G6PD4	0.918412
AT1G71950.1	miR5021	99	5	0.934311	0.646754	no	NA	miR5021:AT1G71950.1	0.918412
AT1G73200.1	miR5663-5p	2199	5.5	0.998994	0.6986	no	NA	miR5663-5p:AT1G73200.1	0.918412
AT5G63530.2	miR4221	68	6	1.30804	1.11841	no	ATFP3	miR4221:ATFP3	0.921499
AT3G04290.1	miR5661	669	5.5	2.96105	0.674475	no	ATLTL1	miR5661:ATLTL1	0.928516
AT1G17840.1	miR1886.1	237	5	0.531838	0.510955	no	ABCG11	miR1886.1:ABCG11	0.930999
AT4G39330.2	miR841b-5p	348	6	2.5442	1.0764	no	ATCAD9	miR841b-5p:ATCAD9	0.930999
AT1G21600.2	miR5638b	688	6	1.79675	0.85499	no	PTAC6	miR5638b:PTAC6	0.937316
AT4G16140.1	miR5021	68	5	0.682766	0.600143	no	NA	miR5021:AT4G16140.1	0.937316
AT5G25350.1	miR1888b	82	5.5	0.919937	0.693619	no	EBF2	miR1888b:EBF2	0.937316
AT4G17170.1	miR156a-3p	527	5.5	0.438407	0.609924	no	AT-RAB2	miR156a-3p:AT-RAB2	0.940302
AT5G23940.1	miR5645a	976	5.5	0.98462	0.766757	no	DCR	miR5645a:DCR	0.942183
AT3G06840.1	miR5641	602	6	0.62527	0.865972	no	NA	miR5641:AT3G06840.1	0.942995
AT1G62120.1	miR5631	690	5.5	0.603708	0.569032	no	NA	miR5631:AT1G62120.1	0.949688
AT3G14830.2	miR8165	1734	5	0.517464	0.285656	no	NA	miR8165:AT3G14830.2	0.956499
AT3G22530.1	miR414	806	6	0.783384	0.992004	no	NA	miR414:AT3G22530.1	0.956499
AT1G61890.1	miR414	252	5.5	0.567773	0.530573	no	NA	miR414:AT1G61890.1	0.956923
AT5G08139.1	miR4221	1225	5.5	0.689953	0.56505	no	NA	miR4221:AT5G08139.1	0.956923
AT1G20970.1	miR847	3798	5.5	0.826506	0.603457	no	NA	miR847:AT1G20970.1	0.95909
AT1G62480.1	miR838	473	5.5	1.38709	0.599378	no	NA	miR838:AT1G62480.1	0.95909
AT5G61410.2	miR3434-3p	568	5.5	0.812132	0.698177	no	EMB2728	miR3434-3p:EMB2728	0.95909
AT5G54630.1	miR847	642	6	0.416846	0.781867	no	NA	miR847:AT5G54630.1	0.960927
AT1G65295.1	miR854a	115	5	1.91174	0.165152	no	NA	miR854a:AT1G65295.1	0.961788
AT4G13615.1	miR774b-5p	14	5.5	0.69714	0.597612	no	NA	miR774b-5p:AT4G13615.1	0.964312
AT4G37820.1	miR837-5p	1643	5.5	0.639644	0.544305	no	NA	miR837-5p:AT4G37820.1	0.964312
AT4G02530.1	miR870-3p	96	5.5	0.395285	0.524504	no	NA	miR870-3p:AT4G02530.1	0.973463
AT1G68560.1	miR5021	118	6	2.35734	0.71632	no	ATXYL1	miR5021:ATXYL1	0.973696
AT3G50060.1	miR779.1	849	6	2.09861	0.769701	no	MYB77	miR779.1:MYB77	0.977556
AT5G43960.2	miR847	1450	6	0.689953	0.886852	no	NA	miR847:AT5G43960.2	0.98372
AT1G29880.1	miR835-5p	1997	6	0.531838	0.891277	no	NA	miR835-5p:AT1G29880.1	0.983951
AT2G20260.1	miR834	241	6	0.495903	0.888955	no	PSAE-2	miR834:PSAE-2	0.983951
AT2G38170.3	miR5636	1179	6	0.955872	0.807201	no	ATCAX1	miR5636:ATCAX1	0.983951
AT3G50570.1	miR2937	579	6	0.654018	0.942656	no	NA	miR2937:AT3G50570.1	0.983951
AT4G33380.2	miR5640	1079	6	0.445594	0.930601	no	NA	miR5640:AT4G33380.2	0.983951
AT1G01550.2	miR5665	146	6	0.481529	0.851325	no	BPS1	miR5665:BPS1	0.98396
AT1G09200.1	miR4221	102	6	1.99799	0.86161	no	NA	miR4221:AT1G09200.1	0.98396
AT1G12080.2	miR838	461	5.5	1.73207	0.399248	no	NA	miR838:AT1G12080.2	0.98396
AT5G26830.1	miR173-3p	1316	6	0.57496	0.893938	no	NA	miR173-3p:AT5G26830.1	0.98396
AT5G60360.3	miR167a-5p	738	5.5	1.17867	0.439244	no	AALP	miR167a-5p:AALP	0.98396
AT5G60400.3	miR157c-3p	351	6	0.948685	0.797142	no	NA	miR157c-3p:AT5G60400.3	0.988042
AT4G21660.2	miR847	1356	6	0.98462	0.705987	no	NA	miR847:AT4G21660.2	0.990537
AT1G69530.5	miR162a-3p	941	6	1.34397	0.660015	no	AT-EXP1	miR162a-3p:AT-EXP1	0.992984
AT3G15790.1	miR415	880	6	1.59552	0.681217	no	ATMBD11	miR415:ATMBD11	0.992984
AT1G12080.2	miR4221	353	5.5	0.654018	0.183651	no	NA	miR4221:AT1G12080.2	0.99569
AT1G21160.1	miR840-3p	3584	6	0.567773	0.645118	no	NA	miR840-3p:AT1G21160.1	0.99569
AT1G33811.1	miR158a-5p	958	5.5	0.50309	0.429322	no	NA	miR158a-5p:AT1G33811.1	0.99569
AT2G13360.2	miR5021	1381	5.5	1.35116	0.418799	no	AGT	miR5021:AGT	0.99569
AT2G34650.1	miR173-3p	409	6	0.927124	0.690834	no	ABR	miR173-3p:ABR	0.99569
AT3G05220.2	miR847	1234	6	2.67357	0.649364	no	NA	miR847:AT3G05220.2	0.99569
AT3G20520.1	miR835-3p	2187	5.5	0.481529	0.400941	no	GDPDL5	miR835-3p:GDPDL5	0.99569
AT4G01150.2	miR3440b-3p	252	5.5	0.309041	0.260893	no	NA	miR3440b-3p:AT4G01150.2	0.99569
AT4G38740.1	miR776	534	6	2.91074	0.723457	no	ROC1	miR776:ROC1	0.99569
AT5G11070.1	miR5658	378	6	0.62527	0.697661	no	NA	miR5658:AT5G11070.1	0.99569
AT5G20070.1	miR2936	1339	6	1.883	0.706059	no	ATNUDT19	miR2936:ATNUDT19	0.99569
AT5G28640.1	miR779.1	944	6	1.30804	0.633238	no	AN3	miR779.1:AN3	0.99569
AT3G55170.2	miR5015	336	6	0.474342	0.810381	no	NA	miR5015:AT3G55170.2	0.996192
AT1G29220.2	miR773a	1196	6	0.517464	0.615317	no	NA	miR773a:AT1G29220.2	0.999345
AT1G04410.1	miR171c-5p	666	6	0.589334	0.408655	no	c-NAD-MDH1	miR171c-5p:c-NAD-MDH1	0.999947
AT1G22640.1	miR164c-3p	613	6	0.402472	0.403899	no	ATMYB3	miR164c-3p:ATMYB3	0.999947
AT1G49300.2	miR3434-5p	515	6	0.826506	0.341063	no	ATRAB7	miR3434-5p:ATRAB7	0.999947
AT1G50010.1	miR5641	96	6	0.69714	0.229009	no	TUA2	miR5641:TUA2	0.999947
AT1G52300.1	miR778	330	6	1.30804	0.346378	no	NA	miR778:AT1G52300.1	0.999947
AT1G68300.1	miR2939	621	6	0.467155	0.435137	no	NA	miR2939:AT1G68300.1	0.999947
AT1G72020.1	miR5651	278	6	0.668392	0.424279	no	NA	miR5651:AT1G72020.1	0.999947
AT1G78080.1	miR5021	653	6	0.689953	0.466418	no	RAP2.4	miR5021:RAP2.4	0.999947
AT2G01710.1	miR869.2	288	6	1.11399	0.424973	no	NA	miR869.2:AT2G01710.1	0.999947
AT2G03120.1	miR5634	546	6	0.725888	0.466165	no	ATSPP	miR5634:ATSPP	0.999947
AT2G04570.1	miR1888b	104	6	1.71769	0.228464	no	NA	miR1888b:AT2G04570.1	0.999947
AT2G04570.1	miR774b-3p	984	6	2.74544	0.445747	no	NA	miR774b-3p:AT2G04570.1	0.999947
AT2G07698.1	miR867	1295	6	0.862441	0.0534955	no	NA	miR867:AT2G07698.1	0.999947
AT2G10940.2	miR862-5p	726	6	4.4775	0.332936	no	NA	miR862-5p:AT2G10940.2	0.999947
AT2G18160.1	miR5633	829	5.5	0.402472	0.0944922	no	ATBZIP2	miR5633:ATBZIP2	0.999947
AT2G18162.1	miR5633	829	5.5	0.402472	0.0944922	no	CPuORF1	miR5633:CPuORF1	0.999947
AT2G25250.1	miR854a	255	6	0.797758	0.474523	no	NA	miR854a:AT2G25250.1	0.999947
AT2G32060.3	miR5666	435	5.5	0.510277	0.20579	no	NA	miR5666:AT2G32060.3	0.999947
AT2G39730.3	miR863-5p	420	6	2.50827	0.564233	no	RCA	miR863-5p:RCA	0.999947
AT3G01500.3	miR5024-3p	748	6	0.675579	0.19139	no	ATBCA1	miR5024-3p:ATBCA1	0.999947
AT3G06125.3	miR2111a-5p	132	6	0.459968	0.190181	no	NA	miR2111a-5p:AT3G06125.3	0.999947
AT3G22440.1	miR162a-3p	523	6	0.618083	0.513855	no	NA	miR162a-3p:AT3G22440.1	0.999947
AT3G58730.1	miR168b-3p	814	6	1.37272	0.410551	no	NA	miR168b-3p:AT3G58730.1	0.999947
AT3G62250.1	miR838	281	6	0.57496	0.207491	no	UBQ5	miR838:UBQ5	0.999947
AT4G02940.1	miR8172	1827	6	0.43122	0.423576	no	NA	miR8172:AT4G02940.1	0.999947
AT4G17840.1	miR8179	21	5.5	0.459968	0.299997	no	NA	miR8179:AT4G17840.1	0.999947
AT4G29030.1	miR841b-5p	609	6	0.546212	0.352607	no	NA	miR841b-5p:AT4G29030.1	0.999947
AT4G29670.2	miR169f-3p	704	6	0.402472	0.454724	no	ACHT2	miR169f-3p:ACHT2	0.999947
AT5G15530.1	miR3434-3p	762	6	0.402472	0.414186	no	BCCP2	miR3434-3p:BCCP2	0.999947
AT5G18460.1	miR838	1663	6	0.747449	0.482286	no	NA	miR838:AT5G18460.1	0.999947
AT5G20165.3	miR8172	536	6	0.402472	0.255707	no	NA	miR8172:AT5G20165.3	0.999947
AT5G45390.1	miR173-3p	253	6	0.790571	0.577863	no	CLPP4	miR173-3p:CLPP4	0.999947
AT5G57685.1	miR414	435	6	0.43122	0.500176	no	ATGDU3	miR414:ATGDU3	0.999947
AT5G64310.1	miR417	426	6	1.0493	0.605211	no	AGP1	miR417:AGP1	0.999947

## Sheet: xrn4-5 (biorep #3)
Target transcript	miRNA	miRNA slice site position in target transcript	Allen score of sRNA:target duplex	Slice site RPM	Slice site RPM + 1/Maximum adjacent site RPM + 1	Previously verified by 5' RACE?	Target gene common name	Interaction name	P-value adjusted for multiple testing
AT1G10120.1	miR396a-5p	1316	5.5	9.35479	8.12051	yes	NA	miR396a-5p:AT1G10120.1	0
AT1G17840.1	miR1886.1	237	5	2.20113	3.20113	no	ABCG11	miR1886.1:ABCG11	0
AT1G27340.1	miR394a	1382	1	1.65085	2.65085	yes	LCR	miR394a:LCR	0
AT1G27360.4	miR156j	1309	0	0.550282	0.738033	no	SPL11	miR156j:SPL11	0
AT1G27370.4	miR157a-5p	1325	2	0.550282	0.738033	no	SPL10	miR157a-5p:SPL10	0
AT1G30330.2	miR167a-5p	3246	5	27.5141	7.6009	no	ARF6	miR167a-5p:ARF6	0
AT1G31280.1	miR403-3p	3232	1	6.60338	2.86828	yes	AGO2	miR403-3p:AGO2	0
AT1G33120.1	miR5630a	309	0	0.528271	0.326457	no	NA	miR5630a:AT1G33120.1	0
AT1G33140.1	miR5630a	309	0	0.0220113	0.873076	no	PGY2	miR5630a:PGY2	0
AT1G77850.1	miR160a-5p	1419	0.5	113.358	114.358	yes	ARF17	miR160a-5p:ARF17	0
AT2G02850.1	miR408-3p	107	1	1.10056	0.79241	yes	ARPN	miR408-3p:ARPN	0
AT2G22840.1	miR396a-5p	791	4	11.5559	12.5559	yes	AtGRF1	miR396a-5p:AtGRF1	0
AT2G28350.1	miR160a-5p	1339	2	185.445	186.445	yes	ARF10	miR160a-5p:ARF10	0
AT2G33770.1	miR399a	750	1.5	0.550282	1.55028	yes	ATUBC24	miR399a:ATUBC24	0
AT2G33770.1	miR399f	839	1	0.550282	1.55028	yes	ATUBC24	miR399f:ATUBC24	0
AT2G33810.1	miR156a-5p	796	1.5	0.550282	0.738033	yes	SPL3	miR156a-5p:SPL3	0
AT2G36400.1	miR396a-5p	756	4	8.80451	6.32434	yes	AtGRF3	miR396a-5p:AtGRF3	0
AT2G42200.1	miR156j	946	0	1.10056	2.10056	no	AtSPL9	miR156j:AtSPL9	0
AT2G45160.1	miR171a-3p	1013	0	214.06	33.0718	yes	ATHAM1	miR171a-3p:ATHAM1	0
AT3G11440.1	miR159a	1165	3.5	5.72293	6.72293	yes	ATMYB65	miR159a:ATMYB65	0
AT3G52910.1	miR396a-5p	752	4	24.2124	25.2124	yes	AtGRF4	miR396a-5p:AtGRF4	0
AT3G60630.1	miR171a-3p	1055	0	126.015	16.7051	yes	ATHAM2	miR171a-3p:ATHAM2	0
AT3G61310.1	miR167d	1217	2.5	1.10056	0.656193	no	NA	miR167d:AT3G61310.1	0
AT3G62000.2	miR5646	274	6	1.65085	2.65085	no	NA	miR5646:AT3G62000.2	0
AT3G62980.1	miR393a-5p	1721	2	9.90508	5.19151	yes	AtTIR1	miR393a-5p:AtTIR1	0
AT4G00150.1	miR171a-3p	866	0	130.417	49.5754	yes	ATHAM3	miR171a-3p:ATHAM3	0
AT4G30080.1	miR160a-5p	1518	2.5	44.0226	45.0226	yes	ARF16	miR160a-5p:ARF16	0
AT4G36920.2	miR172c	1303	1	2.20113	3.20113	yes	AP2	miR172c:AP2	0
AT4G37740.1	miR396a-5p	920	4	8.80451	9.80451	yes	AtGRF2	miR396a-5p:AtGRF2	0
AT5G06100.3	miR159a	1259	3.5	8.03412	9.03412	yes	ATMYB33	miR159a:ATMYB33	0
AT5G20670.1	miR8175	466	2.5	1.10056	0.79241	no	NA	miR8175:AT5G20670.1	0
AT5G27660.1	miR5657	1534	0	0.550282	0.0809154	no	DEG14	miR5657:DEG14	0
AT5G37020.2	miR167a-5p	2380	4	55.5785	21.3435	yes	ARF8	miR167a-5p:ARF8	0
AT5G39740.2	miR414	997	1.5	0.550282	0.142161	no	OLI7	miR414:OLI7	0
AT5G43270.3	miR156j	1111	0	3.85197	2.30985	yes	SPL2	miR156j:SPL2	0
AT5G57580.1	miR414	2139	1	0.550282	0.738033	no	NA	miR414:AT5G57580.1	0
AT1G06180.1	miR858a	402	3	6.0531	7.0531	yes	ATMYB13	miR858a:ATMYB13	0.00309684
AT1G64583.1	miR161.1	738	2.5	1.65085	2.65085	no	NA	miR161.1:AT1G64583.1	0.00387832
AT1G30490.1	miR165a-3p	805	3	1.65085	2.65085	yes	ATHB9	miR165a-3p:ATHB9	0.00388573
AT2G27400.1	miR173-5p	378	2.5	3.85197	4.85197	yes	TAS1a	miR173-5p:TAS1a	0.00655382
AT2G39675.1	miR173-5p	378	2.5	5.50282	6.50282	yes	TAS1c	miR173-5p:TAS1c	0.00655382
AT2G39681.1	miR173-5p	417	2.5	8.80451	9.80451	yes	TAS2	miR173-5p:TAS2	0.00655382
AT1G51760.1	miR167a-5p	862	3	3.85197	3.12973	no	IAR3	miR167a-5p:IAR3	0.00951313
AT1G64500.1	miR414	227	2.5	0.550282	1.55028	no	NA	miR414:AT1G64500.1	0.0157915
AT5G43630.1	miR414	856	2.5	0.550282	1.55028	no	TZP	miR414:TZP	0.0157915
AT1G52150.3	miR166a-3p	1278	3	3.30169	2.04788	yes	ATHB-15	miR166a-3p:ATHB-15	0.0160783
AT4G03190.1	miR393a-5p	1597	3	2.75141	2.41982	yes	AFB1	miR393a-5p:AFB1	0.0167032
AT1G12820.1	miR393a-5p	1894	4	3.85197	2.30985	yes	AFB3	miR393a-5p:AFB3	0.0245499
AT2G34710.1	miR165a-3p	880	3	2.20113	1.52394	yes	ATHB-14	miR165a-3p:ATHB-14	0.0255509
AT4G24150.1	miR396a-5p	847	4	1.65085	2.65085	yes	AtGRF8	miR396a-5p:AtGRF8	0.0262225
AT3G13460.4	miR5021	179	2	1.10056	2.10056	no	ECT2	miR5021:ECT2	0.0270097
AT5G60690.1	miR165a-3p	1272	3	1.10056	1.35495	yes	IFL	miR165a-3p:IFL	0.0274778
AT1G08125.3	miR390a-3p	887	5	2.75141	3.75141	no	NA	miR390a-3p:AT1G08125.3	0.0298648
AT1G28320.1	miR158a-5p	1767	5	2.75141	3.75141	no	DEG15	miR158a-5p:DEG15	0.0349696
AT5G53660.1	miR396a-5p	539	4	1.10056	2.10056	yes	AtGRF7	miR396a-5p:AtGRF7	0.0388565
AT3G62610.1	miR858a	300	3.5	2.20113	2.06487	no	ATMYB11	miR858a:ATMYB11	0.043162
AT1G14310.1	miR829-5p	770	4.5	1.10056	2.10056	no	NA	miR829-5p:AT1G14310.1	0.0526755
AT3G26810.1	miR393a-5p	2009	4	1.65085	1.70991	yes	AFB2	miR393a-5p:AFB2	0.0526755
AT4G26110.2	miR414	1111	2	0.550282	0.584824	no	ATNAP1;1	miR414:ATNAP1;1	0.0526755
AT5G23730.1	miR414	1212	2.5	0.550282	0.738033	no	EFO2	miR414:EFO2	0.0644488
AT1G50055.1	miR173-5p	373	4.5	15.4079	10.5838	yes	TAS1b	miR173-5p:TAS1b	0.0651733
AT1G63400.1	miR161.2	999	2	0.550282	1.09738	yes	NA	miR161.2:AT1G63400.1	0.077059
AT3G63400.3	miR842	776	3.5	0.550282	1.55028	no	NA	miR842:AT3G63400.3	0.0797884
AT3G23690.1	miR393a-5p	416	3	1.10056	1	yes	NA	miR393a-5p:AT3G23690.1	0.0815064
AT2G11910.2	miR414	502	3	3.30169	1.3438	no	NA	miR414:AT2G11910.2	0.0818983
AT1G18710.1	miR858b	486	4.5	1.10056	2.10056	no	AtMYB47	miR858b:AtMYB47	0.0824731
AT5G43060.1	miR396b-5p	518	3	1.10056	1	no	RD21B	miR396b-5p:RD21B	0.0824731
AT4G32880.1	miR165a-3p	944	3	0.550282	0.738033	no	ATHB-8	miR165a-3p:ATHB-8	0.0976191
AT5G57735.1	miR390a-5p	428	4.5	1.10056	2.10056	yes	TAS3c	miR390a-5p:TAS3c	0.0994006
AT2G47460.1	miR858b	400	2.5	2.75141	0.493387	yes	ATMYB12	miR858b:ATMYB12	0.0994483
AT1G28580.2	miR837-5p	899	4.5	1.10056	2.10056	no	NA	miR837-5p:AT1G28580.2	0.106341
AT5G16650.1	miR158a-5p	882	3.5	0.550282	1	no	NA	miR158a-5p:AT5G16650.1	0.118753
AT1G62914.1	miR161.2	978	3	0.550282	1	no	NA	miR161.2:AT1G62914.1	0.130622
AT1G63130.1	miR161.1	1102	2.5	0.550282	0.738033	yes	TAS8	miR161.1:TAS8	0.144711
AT1G78480.1	miR858a	183	5.5	1.65085	2.65085	no	NA	miR858a:AT1G78480.1	0.164926
AT5G02750.1	miR854a	240	4.5	1.10056	2.10056	no	SGR9	miR854a:SGR9	0.166454
AT3G17185.2	miR390a-5p	863	4.5	1.65085	2.65085	yes	TAS3a	miR390a-5p:TAS3a	0.167036
AT3G26030.1	miR5021	58	4	1.10056	2.10056	no	ATB' DELTA	miR5021:ATB' DELTA	0.16704
AT4G12650.1	miR4227	625	3.5	1.10056	1	no	NA	miR4227:AT4G12650.1	0.16756
AT4G12670.1	miR156f-3p	957	6	1.65085	2.65085	no	NA	miR156f-3p:AT4G12670.1	0.16756
AT1G11200.1	miR856	784	3.5	0.550282	1	no	NA	miR856:AT1G11200.1	0.185831
AT4G18030.1	miR5999	2119	3.5	1.10056	1	no	NA	miR5999:AT4G18030.1	0.185831
AT1G58030.1	miR782	1725	5	2.20113	2.06487	no	CAT2	miR782:CAT2	0.190338
AT3G49010.5	miR5662	83	3.5	3.85197	1	no	ATBBC1	miR5662:ATBBC1	0.190338
AT1G69670.1	miR858a	1751	4.5	0.550282	1.55028	no	ATCUL3B	miR858a:ATCUL3B	0.205733
AT5G45950.1	miR159a	876	3.5	1.10056	0.79241	no	NA	miR159a:AT5G45950.1	0.205733
AT1G69220.2	miR4221	1778	6	1.65085	2.65085	no	SIK1	miR4221:SIK1	0.205958
AT4G21510.1	miR403-3p	379	4	0.550282	1.55028	no	AtFBS2	miR403-3p:AtFBS2	0.221885
AT1G51645.1	miR5021	114	6	1.10056	2.10056	no	NA	miR5021:AT1G51645.1	0.23877
AT4G15510.3	miR5021	438	6	1.10056	2.10056	no	PPD1	miR5021:PPD1	0.23877
AT3G02950.1	miR837-5p	599	4.5	0.550282	1.55028	no	AtTHO7	miR837-5p:AtTHO7	0.286546
AT5G63050.2	miR172e-3p	742	5	0.550282	1.55028	no	EMB2759	miR172e-3p:EMB2759	0.297132
AT4G28770.2	miR414	887	4	1.10056	1	no	NA	miR414:AT4G28770.2	0.297218
AT1G02860.2	miR827	268	1	1.10056	0.559939	yes	BAH1	miR827:BAH1	0.301914
AT1G08320.3	miR847	486	5	0.550282	1.55028	no	bZIP21	miR847:bZIP21	0.301914
AT1G22490.1	miR847	392	5	0.550282	1.55028	no	NA	miR847:AT1G22490.1	0.301914
AT4G10570.1	miR8181	2925	4.5	0.550282	1.55028	no	UBP9	miR8181:UBP9	0.303379
AT3G25180.2	miR391-3p	1295	4	0.550282	1	no	CYP82G1	miR391-3p:CYP82G1	0.317896
AT4G15480.1	miR831-3p	959	4.5	1.10056	1.35495	no	UGT84A1	miR831-3p:UGT84A1	0.325045
AT1G16720.1	miR868-3p	1851	4	1.10056	1.35495	no	HCF173	miR868-3p:HCF173	0.330738
AT1G61010.3	miR156f-3p	2048	4	0.550282	1	no	CPSF73-I	miR156f-3p:CPSF73-I	0.340999
AT1G14670.1	miR5658	1537	4	1.10056	1	no	NA	miR5658:AT1G14670.1	0.346666
AT4G19140.1	miR390b-3p	1032	5	0.550282	1.55028	no	NA	miR390b-3p:AT4G19140.1	0.348093
AT1G73430.2	miR165a-5p	1136	5.5	0.550282	1.55028	no	NA	miR165a-5p:AT1G73430.2	0.355059
AT2G03550.1	miR447c-3p	162	4.5	1.10056	1.35495	no	NA	miR447c-3p:AT2G03550.1	0.355059
AT1G67230.1	miR838	1015	5	1.65085	1.70991	no	CRWN1	miR838:CRWN1	0.38017
AT5G59290.2	miR2112-5p	630	4.5	0.550282	1.55028	no	ATUXS3	miR2112-5p:ATUXS3	0.38017
AT1G43710.1	miR865-3p	777	3.5	0.550282	0.584824	no	ATSDC1	miR865-3p:ATSDC1	0.384597
AT1G32500.1	miR162a-3p	1470	3.5	0.550282	0.584824	no	ABCI7	miR162a-3p:ABCI7	0.389086
AT2G41900.1	miR5021	54	2	0.550282	0.286969	no	OXS2	miR5021:OXS2	0.389086
AT1G20980.1	miR831-5p	3804	4.5	0.550282	1.55028	no	ATSPL14	miR831-5p:ATSPL14	0.399044
AT2G16940.3	miR414	1441	4	0.550282	1	no	NA	miR414:AT2G16940.3	0.399044
AT3G02200.2	miR408-3p	763	4.5	1.10056	1.35495	no	NA	miR408-3p:AT3G02200.2	0.399044
AT3G25290.2	miR8165	910	4.5	0.550282	1.55028	no	NA	miR8165:AT3G25290.2	0.399044
AT3G51990.1	miR5632-5p	586	5	0.550282	1.55028	no	NA	miR5632-5p:AT3G51990.1	0.399044
AT4G04350.1	miR826a	2928	5	0.550282	1.55028	no	EMB2369	miR826a:EMB2369	0.399044
AT4G31410.2	miR396b-5p	1105	5	2.75141	1.78591	no	NA	miR396b-5p:AT4G31410.2	0.399044
AT5G09460.1	miR838	2121	3.5	0.550282	0.360389	no	NA	miR838:AT5G09460.1	0.399044
AT5G09461.1	miR838	2121	3.5	0.550282	0.360389	no	CPuORF43	miR838:CPuORF43	0.399044
AT5G09462.1	miR838	2121	3.5	0.550282	0.360389	no	CPuORF42	miR838:CPuORF42	0.399044
AT5G09463.1	miR838	2121	3.5	0.550282	0.360389	no	CPuORF41	miR838:CPuORF41	0.399044
AT5G13770.1	miR414	1280	5	0.550282	1.55028	no	NA	miR414:AT5G13770.1	0.399044
AT5G66030.2	miR824-3p	1773	6	1.10056	2.10056	no	ATGRIP	miR824-3p:ATGRIP	0.399044
AT5G50840.2	miR782	1038	5.5	0.550282	1.55028	no	NA	miR782:AT5G50840.2	0.416381
AT5G51600.1	miR396a-5p	982	5.5	0.550282	1.55028	no	ATMAP65-3	miR396a-5p:ATMAP65-3	0.416381
AT5G27360.1	miR169b-5p	385	6	0.550282	1.55028	no	SFP2	miR169b-5p:SFP2	0.418236
AT5G58130.1	miR414	1430	5.5	0.550282	1.55028	no	ROS3	miR414:ROS3	0.418236
AT3G19050.1	miR835-5p	3469	5.5	0.550282	1.55028	no	POK2	miR835-5p:POK2	0.418755
AT5G17930.1	miR162a-3p	1843	5	0.550282	1.55028	no	NA	miR162a-3p:AT5G17930.1	0.419318
AT4G23640.1	miR5632-3p	2027	5	1.65085	1.70991	no	ATKT3	miR5632-3p:ATKT3	0.421093
AT3G06380.1	miR396a-5p	1297	4.5	0.550282	1	no	ATTLP9	miR396a-5p:ATTLP9	0.426362
AT3G50690.1	miR865-3p	12	5.5	0.550282	1.55028	no	NA	miR865-3p:AT3G50690.1	0.426362
AT4G32520.2	miR393a-3p	1036	4.5	1.10056	1	no	AtSHMT3	miR393a-3p:AtSHMT3	0.426362
AT2G40660.1	miR169f-3p	762	5.5	0.550282	1.55028	no	NA	miR169f-3p:AT2G40660.1	0.42828
AT3G45930.1	miR172d-5p	506	4.5	1.10056	1.35495	no	NA	miR172d-5p:AT3G45930.1	0.42828
AT1G09620.1	miR391-3p	176	5	0.550282	1.55028	no	NA	miR391-3p:AT1G09620.1	0.429126
AT3G09200.2	miR5662	663	3.5	0.550282	0.484292	no	NA	miR5662:AT3G09200.2	0.429126
AT3G50790.1	miR390b-3p	1127	5.5	2.20113	2.06487	no	NA	miR390b-3p:AT3G50790.1	0.429126
AT4G19160.3	miR417	862	5	0.550282	1.55028	no	NA	miR417:AT4G19160.3	0.429126
AT4G00780.1	miR397b	720	4.5	1.10056	1	no	NA	miR397b:AT4G00780.1	0.431123
AT4G02940.1	miR415	1936	3	0.550282	0.584824	no	NA	miR415:AT4G02940.1	0.431123
AT5G43130.2	miR838	1767	4	0.550282	0.738033	no	TAF4	miR838:TAF4	0.431123
AT4G11350.2	miR164c-3p	2369	6	0.709864	1.67304	no	NA	miR164c-3p:AT4G11350.2	0.441265
AT4G12910.1	miR5637	944	5.5	0.550282	1.55028	no	scpl20	miR5637:scpl20	0.441265
AT5G53350.1	miR5021	145	4	0.550282	1.55028	no	CLPX	miR5021:CLPX	0.453811
AT3G11250.1	miR5662	764	4	0.550282	1	no	NA	miR5662:AT3G11250.1	0.460731
AT3G25520.2	miR414	699	3.5	1.10056	0.167297	no	ATL5	miR414:ATL5	0.460883
AT1G63010.5	miR827	214	5	0.550282	1.55028	no	NA	miR827:AT1G63010.5	0.467143
AT1G19990.1	miR5645a	548	4.5	0.550282	1	no	NA	miR5645a:AT1G19990.1	0.472106
AT3G08670.1	miR8180	858	5	0.550282	1.55028	no	NA	miR8180:AT3G08670.1	0.474856
AT5G58950.1	miR5658	686	5	0.550282	1.55028	no	NA	miR5658:AT5G58950.1	0.476412
AT5G23670.2	miR2936	79	4.5	0.550282	1	no	LCB2	miR2936:LCB2	0.478829
AT1G19830.1	miR391-3p	249	6	1.65085	1.70991	no	NA	miR391-3p:AT1G19830.1	0.481894
AT1G56450.1	miR172d-5p	637	4.5	1.10056	1	no	PBG1	miR172d-5p:PBG1	0.481894
AT5G18390.1	miR5663-5p	356	6	0.550282	1.55028	no	NA	miR5663-5p:AT5G18390.1	0.481894
AT5G38880.1	miR838	1893	6	0.550282	1.55028	no	2018-08-05	miR838:AUG5	0.482053
AT5G65060.2	miR2112-3p	717	5	1.10056	1.35495	no	AGL70	miR2112-3p:AGL70	0.482053
AT5G64920.1	miR847	495	4	0.550282	0.738033	no	CIP8	miR847:CIP8	0.488177
AT3G06150.1	miR839-5p	623	5.5	0.550282	1.55028	no	NA	miR839-5p:AT3G06150.1	0.500006
AT1G71160.1	miR5998a	794	6	0.550282	1.55028	no	KCS7	miR5998a:KCS7	0.504969
AT5G45040.1	miR5996	297	5	1.10056	1.35495	no	CYTC6A	miR5996:CYTC6A	0.504969
AT3G51880.4	miR414	542	4	1.10056	0.656193	no	AtHMGB1	miR414:AtHMGB1	0.514236
AT1G53280.1	miR5642a	1320	4.5	1.65085	1.26197	no	AtDJ1B	miR5642a:AtDJ1B	0.516663
AT1G02090.3	miR5648-5p	438	5	1.10056	1	no	ATCSN7	miR5648-5p:ATCSN7	0.517337
AT1G55560.1	miR865-3p	726	6	0.550282	1.55028	no	sks14	miR865-3p:sks14	0.517337
AT3G07770.1	miR3440b-5p	2453	5	1.65085	1.26197	no	AtHsp90-6	miR3440b-5p:AtHsp90-6	0.525008
AT4G13590.2	miR158a-5p	707	5.5	1.65085	1.70991	no	NA	miR158a-5p:AT4G13590.2	0.527946
AT5G23000.1	miR858a	402	5.5	0.550282	1.55028	no	ATMYB37	miR858a:ATMYB37	0.527946
AT4G36890.1	miR396b-5p	1392	5.5	0.550282	1.55028	no	IRX14	miR396b-5p:IRX14	0.533896
AT1G05230.4	miR391-3p	2172	5.5	0.550282	1.55028	no	HDG2	miR391-3p:HDG2	0.535505
AT1G02020.2	miR5021	281	4	0.550282	1	no	NA	miR5021:AT1G02020.2	0.541231
AT1G68140.3	miR395a	362	5.5	0.550282	1.55028	no	NA	miR395a:AT1G68140.3	0.551877
AT2G31280.4	miR776	2591	5.5	0.550282	1.55028	no	CPUORF7	miR776:CPUORF7	0.552039
AT1G22640.1	miR858a	394	5	0.550282	1	no	ATMYB3	miR858a:ATMYB3	0.561558
AT3G49601.1	miR840-3p	859	5	1.10056	1	no	NA	miR840-3p:AT3G49601.1	0.561558
AT1G01320.2	miR857	3165	6	0.550282	1.55028	no	NA	miR857:AT1G01320.2	0.562337
AT1G08190.1	miR847	3017	5	1.10056	1	no	ATVAM2	miR847:ATVAM2	0.562337
AT2G22080.1	miR414	598	4	0.550282	0.484292	no	NA	miR414:AT2G22080.1	0.562337
AT3G01230.1	miR859	541	6	0.550282	1.55028	no	NA	miR859:AT3G01230.1	0.562337
AT5G51430.1	miR4227	1634	5	0.550282	1	no	EYE	miR4227:EYE	0.562337
AT3G49870.1	miR5658	109	4	0.550282	0.584824	no	ARLA1C	miR5658:ARLA1C	0.571288
AT5G26360.1	miR858a	1741	4.5	1.65085	0.828098	no	NA	miR858a:AT5G26360.1	0.577463
AT5G14050.1	miR5630a	900	6	0.550282	1.55028	no	NA	miR5630a:AT5G14050.1	0.578226
AT5G61440.1	miR396b-5p	718	5	1.10056	1	no	ACHT5	miR396b-5p:ACHT5	0.578515
AT1G27530.1	miR5645a	398	5	1.10056	1	no	NA	miR5645a:AT1G27530.1	0.600017
AT3G15020.2	miR827	680	5.5	1.10056	1.35495	no	mMDH2	miR827:mMDH2	0.600017
AT4G21800.2	miR414	1284	4.5	0.550282	0.738033	no	QQT2	miR414:QQT2	0.600017
AT4G38980.1	miR414	758	4.5	0.550282	0.738033	no	NA	miR414:AT4G38980.1	0.600017
AT5G34853.1	miR5632-5p	3321	4.5	0.550282	0.738033	no	MUG8	miR5632-5p:MUG8	0.600017
AT4G30520.1	miR5021	126	5	1.10056	1.35495	no	SARK	miR5021:SARK	0.601956
AT3G20050.1	miR5645a	1735	4.5	0.550282	1	no	ATTCP-1	miR5645a:ATTCP-1	0.608928
AT1G60690.1	miR8166	761	6	0.550282	1.55028	no	NA	miR8166:AT1G60690.1	0.619836
AT1G07400.1	miR3440b-5p	634	6	0.550282	1.55028	no	NA	miR3440b-5p:AT1G07400.1	0.622761
AT1G29150.1	miR156b-3p	281	4.5	0.550282	0.738033	no	ATS9	miR156b-3p:ATS9	0.629086
AT3G08850.1	miR159a	3740	5.5	1.10056	1.35495	no	ATRAPTOR1B	miR159a:ATRAPTOR1B	0.636485
AT5G52840.1	miR838	281	5.5	1.65085	1.26197	no	NA	miR838:AT5G52840.1	0.636485
AT1G20630.1	miR391-3p	1474	5.5	1.65085	1.26197	no	CAT1	miR391-3p:CAT1	0.639375
AT1G01930.1	miR5642a	1657	6	0.550282	1.55028	no	NA	miR5642a:AT1G01930.1	0.643007
AT1G10450.1	miR5015	2979	6	0.550282	1.55028	no	SNL6	miR5015:SNL6	0.643007
AT1G68710.1	miR840-3p	836	6	0.550282	1.55028	no	NA	miR840-3p:AT1G68710.1	0.643007
AT3G56260.2	miR831-3p	768	5	0.550282	1	no	NA	miR831-3p:AT3G56260.2	0.643007
AT4G08310.1	miR414	1506	4.5	0.550282	0.738033	no	NA	miR414:AT4G08310.1	0.643007
AT4G24520.2	miR2937	884	6	0.550282	1.55028	no	AR1	miR2937:AR1	0.643007
AT5G08280.1	miR847	1357	4.5	1.10056	0.79241	no	HEMC	miR847:HEMC	0.643007
AT5G36230.1	miR4221	928	5	2.20113	1	no	NA	miR4221:AT5G36230.1	0.643007
AT5G41100.2	miR4239	664	6	0.550282	1.55028	no	NA	miR4239:AT5G41100.2	0.643007
ATCG00860.1	miR5012	3828	5	0.550282	1.21577	no	YCF2.1	miR5012:YCF2.1	0.643007
ATCG01280.1	miR5012	3828	5	0.550282	1.21577	no	YCF2.2	miR5012:YCF2.2	0.643007
AT2G26240.1	miR868-3p	78	4.5	0.550282	0.738033	no	NA	miR868-3p:AT2G26240.1	0.645102
AT3G27830.1	miR418	201	4	0.550282	0.484292	no	RPL12	miR418:RPL12	0.646008
AT1G19430.1	miR156d-3p	1260	5.5	0.550282	1	no	NA	miR156d-3p:AT1G19430.1	0.656115
AT2G47440.1	miR773b-5p	651	5	1.65085	1	no	NA	miR773b-5p:AT2G47440.1	0.661406
AT3G28970.1	miR5025	672	5	0.550282	1	no	AAR3	miR5025:AAR3	0.661406
AT1G06420.2	miR858a	170	6	1.10056	1.35495	no	NA	miR858a:AT1G06420.2	0.662005
AT1G30890.2	miR417	762	4.5	0.550282	0.584824	no	NA	miR417:AT1G30890.2	0.662005
AT1G60940.2	miR858a	1020	6	2.20113	1.52394	no	SNRK2-10	miR858a:SNRK2-10	0.662005
AT1G61180.2	miR870-3p	1453	5.5	0.550282	1	no	NA	miR870-3p:AT1G61180.2	0.662005
AT1G74340.1	miR3932b-5p	139	6	1.10056	1.35495	no	DPMS2	miR3932b-5p:DPMS2	0.662005
AT1G78650.1	miR773a	1515	4.5	0.550282	0.584824	no	POLD3	miR773a:POLD3	0.662005
AT2G16485.1	miR390b-3p	5048	5.5	0.550282	1	no	NERD	miR390b-3p:NERD	0.662005
AT2G40430.3	miR414	951	5.5	1.10056	1	no	NA	miR414:AT2G40430.3	0.662005
AT3G07740.4	miR870-3p	1194	4.5	0.550282	0.584824	no	ADA2A	miR870-3p:ADA2A	0.662005
AT3G14400.1	miR169f-3p	794	5.5	0.550282	1	no	UBP25	miR169f-3p:UBP25	0.662005
AT3G15810.1	miR824-3p	396	6	2.20113	1.52394	no	NA	miR824-3p:AT3G15810.1	0.662005
AT3G27010.1	miR4227	694	6	1.10056	1.35495	no	AT-TCP20	miR4227:AT-TCP20	0.662005
AT3G44750.2	miR414	472	4.5	0.550282	0.584824	no	ATHD2A	miR414:ATHD2A	0.662005
AT3G56910.1	miR5021	151	3.5	0.550282	0.584824	no	PSRP5	miR5021:PSRP5	0.662005
AT4G10120.2	miR858a	2751	6	1.10056	1.35495	no	ATSPS4F	miR858a:ATSPS4F	0.662005
AT4G24930.1	miR847	994	5.5	0.550282	1	no	NA	miR847:AT4G24930.1	0.662005
AT4G34430.4	miR156f-3p	468	6	1.10056	1.35495	no	ATSWI3D	miR156f-3p:ATSWI3D	0.662005
AT4G37880.1	miR837-5p	1104	6	1.10056	1.35495	no	NA	miR837-5p:AT4G37880.1	0.662005
AT5G01260.2	miR5012	1037	5.5	1.10056	1	no	NA	miR5012:AT5G01260.2	0.662005
AT5G23530.1	miR780.2	406	5.5	0.550282	1	no	AtCXE18	miR780.2:AtCXE18	0.662005
AT5G54810.1	miR398a-5p	727	6	1.10056	1.35495	no	ATTSB1	miR398a-5p:ATTSB1	0.662005
AT5G09590.1	miR5638a	2225	4	0.550282	0.00192459	no	HSC70-5	miR5638a:HSC70-5	0.662664
AT1G10630.1	miR2111a-5p	455	4.5	0.550282	0.584824	no	ARFA1F	miR2111a-5p:ARFA1F	0.663642
AT1G10740.4	miR5658	1758	5.5	0.550282	1	no	NA	miR5658:AT1G10740.4	0.663642
AT1G48410.3	miR168a-5p	531	5	0.550282	0.738033	yes	AGO1	miR168a-5p:AGO1	0.663642
AT1G64680.1	miR5657	733	4.5	0.550282	0.413253	no	NA	miR5657:AT1G64680.1	0.663642
AT2G33150.1	miR5021	215	4	0.550282	0.738033	no	KAT2	miR5021:KAT2	0.663642
AT3G55410.1	miR846-3p	1315	5.5	0.550282	1	no	NA	miR846-3p:AT3G55410.1	0.663642
AT3G56190.2	miR5663-5p	872	4.5	0.550282	0.584824	no	ALPHA-SNAP2	miR5663-5p:ALPHA-SNAP2	0.663642
AT4G30720.1	miR773b-5p	2245	5.5	1.10056	1	no	PDE327	miR773b-5p:PDE327	0.663642
AT4G34710.2	miR8180	440	6	1.10056	1.35495	no	ADC2	miR8180:ADC2	0.663642
AT4G39930.2	miR5640	359	6	1.10056	1.35495	no	NA	miR5640:AT4G39930.2	0.663642
AT5G04810.1	miR5021	202	6	0.550282	1.47713	no	NA	miR5021:AT5G04810.1	0.663642
AT4G39330.2	miR841b-5p	348	6	3.85197	1.51571	no	ATCAD9	miR841b-5p:ATCAD9	0.664391
AT1G32160.1	miR390b-3p	1108	5	0.550282	1	no	NA	miR390b-3p:AT1G32160.1	0.664792
AT5G12320.1	miR780.1	128	5	0.275141	0.822522	no	NA	miR780.1:AT5G12320.1	0.666909
AT2G04390.1	miR847	328	5	0.00550282	0.924137	no	NA	miR847:AT2G04390.1	0.667802
AT1G56200.2	miR414	377	5	2.20113	0.853314	no	EMB1303	miR414:EMB1303	0.669465
AT4G31840.1	miR5021	208	5.5	2.20113	1	no	AtENODL15	miR5021:AtENODL15	0.671361
AT3G02360.2	miR859	1605	5	1.65085	1.26197	no	NA	miR859:AT3G02360.2	0.675531
AT5G66800.1	miR5641	373	6	0.550282	1.55028	no	NA	miR5641:AT5G66800.1	0.677608
AT1G07930.2	miR414	1061	4.5	0.665841	0.721246	no	NA	miR414:AT1G07930.2	0.690069
AT1G07940.2	miR414	1411	4.5	0.968496	0.665257	no	NA	miR414:AT1G07940.2	0.690069
AT3G48740.1	miR5021	65	6	0.550282	1.55028	no	AtSWEET11	miR5021:AtSWEET11	0.690069
AT3G53630.1	miR838	560	4.5	0.0165085	0.655693	no	NA	miR838:AT3G53630.1	0.690069
AT1G07920.1	miR414	1280	4.5	1.11707	0.654601	no	NA	miR414:AT1G07920.1	0.700036
AT1G23240.3	miR5021	569	3.5	0.550282	0.360389	no	NA	miR5021:AT1G23240.3	0.702689
AT1G30690.2	miR414	832	6	1.65085	1.26197	no	NA	miR414:AT1G30690.2	0.702689
AT4G35950.1	miR413	541	5	0.550282	0.738033	no	ARAC6	miR413:ARAC6	0.702689
AT1G55350.5	miR776	7109	5	0.550282	0.738033	no	ATDEK1	miR776:ATDEK1	0.707765
AT1G74560.3	miR414	863	5	0.550282	0.738033	no	NRP1	miR414:NRP1	0.707765
AT3G07820.1	miR833a-5p	992	6	1.10056	1	no	NA	miR833a-5p:AT3G07820.1	0.707765
AT3G16640.1	miR414	276	4.5	7.70395	0.378247	no	TCTP	miR414:TCTP	0.707765
AT3G54790.2	miR858a	1922	5	0.550282	0.738033	no	NA	miR858a:AT3G54790.2	0.707765
AT3G56150.2	miR838	1477	5	0.550282	0.738033	no	ATEIF3C-1	miR838:ATEIF3C-1	0.707765
AT1G29900.1	miR5645a	3279	5	1.10056	0.79241	no	CARB	miR5645a:CARB	0.724165
AT1G29930.1	miR842	223	4.5	1.10056	0.0958691	no	AB140	miR842:AB140	0.724165
AT1G37130.1	miR3434-5p	2652	4.5	0.550282	0.319516	no	ATNR2	miR3434-5p:ATNR2	0.724165
AT1G55330.1	miR414	96	4.5	0.550282	0.167521	no	AGP21	miR414:AGP21	0.724165
AT2G03510.1	miR2111a-5p	958	5	0.550282	0.738033	no	NA	miR2111a-5p:AT2G03510.1	0.724165
AT2G07779.1	miR5998a	130	6	0.275141	1	no	NA	miR5998a:AT2G07779.1	0.724165
AT2G36250.2	miR5645c	2094	4.5	0.550282	0.484292	no	ATFTSZ2-1	miR5645c:ATFTSZ2-1	0.724165
AT4G22190.1	miR845a	1059	6	1.10056	1	no	NA	miR845a:AT4G22190.1	0.724165
AT4G36960.2	miR4239	712	6	0.550282	1	no	NA	miR4239:AT4G36960.2	0.724165
AT5G06700.1	miR3440b-5p	1555	6	1.65085	1	no	TBR	miR3440b-5p:TBR	0.724165
AT5G22090.2	miR847	1124	6	1.10056	1	no	NA	miR847:AT5G22090.2	0.724165
AT1G62830.1	miR156f-3p	2428	6	0.550282	1	no	ATLSD1	miR156f-3p:ATLSD1	0.725519
AT3G07460.2	miR413	824	6	1.65085	1	no	NA	miR413:AT3G07460.2	0.72735
AT3G22440.1	miR162a-3p	523	6	3.85197	1.12792	no	NA	miR162a-3p:AT3G22440.1	0.72735
AT3G62940.3	miR5642a	645	6	0.550282	1	no	NA	miR5642a:AT3G62940.3	0.735821
AT3G14410.1	miR5656	720	6	0.550282	1	no	NA	miR5656:AT3G14410.1	0.73785
AT4G28400.1	miR5662	423	6	0.550282	1	no	NA	miR5662:AT4G28400.1	0.73785
AT1G61150.7	miR156h	920	6	1.10056	1	no	NA	miR156h:AT1G61150.7	0.739581
AT1G79080.1	miR4239	1857	5	0.550282	0.584824	no	NA	miR4239:AT1G79080.1	0.745379
AT2G20260.1	miR834	241	6	2.20113	1	no	PSAE-2	miR834:PSAE-2	0.746481
AT5G52650.1	miR866-3p	155	5	2.20113	0.744156	no	NA	miR866-3p:AT5G52650.1	0.746934
AT1G61250.2	miR5021	142	5	1.65085	0.828098	no	AtSCAMP1	miR5021:AtSCAMP1	0.756509
AT2G36570.1	miR391-3p	1650	5	2.20113	0.659759	no	NA	miR391-3p:AT2G36570.1	0.756509
AT5G55910.1	miR5021	175	4.5	0.550282	1	no	D6PK	miR5021:D6PK	0.757313
AT1G69690.1	miR5641	735	6	1.10056	1	no	AtTCP15	miR5641:AtTCP15	0.764848
AT3G27810.1	miR858a	499	5	0.550282	0.584824	no	ATMYB21	miR858a:ATMYB21	0.774437
AT1G10390.2	miR414	3414	5	0.550282	0.584824	no	NA	miR414:AT1G10390.2	0.778971
AT4G01290.2	miR4221	3405	5.5	1.10056	0.79241	no	NA	miR4221:AT4G01290.2	0.783027
AT3G24860.1	miR856	676	5.5	0.550282	1	no	NA	miR856:AT3G24860.1	0.784294
AT1G20010.1	miR847	1426	5	1.10056	0.79241	no	TUB5	miR847:TUB5	0.794162
AT1G59700.1	miR838	560	5.5	0.550282	1	no	ATGSTU16	miR838:ATGSTU16	0.794162
AT1G66260.2	miR394a	983	5.5	0.550282	1	no	NA	miR394a:AT1G66260.2	0.794162
AT1G75330.1	miR829-5p	305	5	0.550282	0.738033	no	OTC	miR829-5p:OTC	0.794162
AT3G59770.3	miR773b-3p	4831	5.5	0.550282	1	no	AtSAC9	miR773b-3p:AtSAC9	0.794162
AT5G55660.1	miR847	1804	6	1.10056	1.35495	no	NA	miR847:AT5G55660.1	0.794162
AT5G32440.3	miR5021	215	5	0.550282	0.738033	no	NA	miR5021:AT5G32440.3	0.800946
AT2G31670.1	miR396b-5p	685	5.5	2.20113	1	no	NA	miR396b-5p:AT2G31670.1	0.802742
AT4G19640.1	miR156f-3p	742	5.5	1.10056	0.79241	no	ARA-7	miR156f-3p:ARA-7	0.803323
AT4G21650.1	miR869.2	202	5.5	0.550282	1	no	NA	miR869.2:AT4G21650.1	0.808191
AT3G27360.1	miR856	370	5.5	0.550282	0.738033	no	NA	miR856:AT3G27360.1	0.811089
AT2G04570.1	miR834	401	5	0.550282	0.738033	no	NA	miR834:AT2G04570.1	0.814519
AT5G01530.1	miR5662	896	5.5	7.70395	1.06749	no	LHCB4.1	miR5662:LHCB4.1	0.817568
AT1G31580.1	miR5021	173	4	1.10056	0.656193	no	CXC750	miR5021:CXC750	0.827044
AT3G19050.1	miR4221	7806	5.5	0.550282	0.738033	no	POK2	miR4221:POK2	0.831727
AT5G16050.1	miR773b-5p	574	5.5	1.40322	1.14409	no	GF14 UPSILON	miR773b-5p:GF14 UPSILON	0.839073
AT2G03150.1	miR847	3661	5.5	0.550282	0.738033	no	emb1579	miR847:emb1579	0.841564
AT3G13300.2	miR5634	2761	5	0.550282	0.584824	no	VCS	miR5634:VCS	0.841564
AT3G09300.1	miR414	1143	5.5	0.550282	0.738033	no	ORP3B	miR414:ORP3B	0.844113
AT4G20170.1	miR5021	52	4	0.0110056	0.2695	no	GALS3	miR5021:GALS3	0.85285
AT4G32270.2	miR5012	132	5.5	0.550282	0.738033	no	NA	miR5012:AT4G32270.2	0.85285
AT5G27640.2	miR172d-5p	345	5.5	1.10056	0.79241	no	ATEIF3B-1	miR172d-5p:ATEIF3B-1	0.85285
AT2G02500.1	miR844-3p	1025	6	1.10056	1.35495	no	ATMEPCT	miR844-3p:ATMEPCT	0.855145
AT1G62020.1	miR3440b-5p	3286	5	0.550282	0.484292	no	NA	miR3440b-5p:AT1G62020.1	0.862636
AT3G54950.1	miR834	498	5.5	0.550282	0.738033	no	PLA IIIA	miR834:PLA IIIA	0.862636
AT1G72020.1	miR5651	278	6	2.20113	1.52394	no	NA	miR5651:AT1G72020.1	0.863034
AT3G16850.1	miR395a	815	6	0.330169	1.33017	no	NA	miR395a:AT3G16850.1	0.875487
AT4G26630.2	miR847	2389	6	1.10056	1	no	NA	miR847:AT4G26630.2	0.875487
AT5G18570.1	miR157a-3p	925	6	0.550282	1	no	ATOBGC	miR157a-3p:ATOBGC	0.879082
AT5G45428.1	miR8175	1659	6	0.550282	1	no	CPuORF24	miR8175:CPuORF24	0.879082
AT5G45430.2	miR8175	1711	6	0.550282	1	no	NA	miR8175:AT5G45430.2	0.879082
AT1G02500.2	miR858b	966	5	0.550282	0.26044	no	AtSAM1	miR858b:AtSAM1	0.879586
AT1G15810.1	miR413	1239	6	1.10056	1	no	NA	miR413:AT1G15810.1	0.879586
AT1G18070.3	miR172b-5p	1600	5	0.550282	0.584824	no	NA	miR172b-5p:AT1G18070.3	0.879586
AT1G19570.2	miR842	467	5	0.550282	0.360389	no	ATDHAR1	miR842:ATDHAR1	0.879586
AT1G20450.2	miR5632-5p	918	5	0.550282	0.413253	no	ERD10	miR5632-5p:ERD10	0.879586
AT1G27400.1	miR773a	591	5	0.550282	0.319516	no	NA	miR773a:AT1G27400.1	0.879586
AT1G48920.1	miR414	1280	5.5	0.550282	0.738033	no	ATNUC-L1	miR414:ATNUC-L1	0.879586
AT1G53910.3	miR396a-5p	591	6	1.65085	1	no	RAP2.12	miR396a-5p:RAP2.12	0.879586
AT1G62430.1	miR5652	1233	6	1.10056	1.35495	no	ATCDS1	miR5652:ATCDS1	0.879586
AT1G66670.1	miR397a	819	5.5	0.550282	0.738033	no	CLPP3	miR397a:CLPP3	0.879586
AT2G05220.2	miR847	336	5	1.64534	0.348673	no	NA	miR847:AT2G05220.2	0.879586
AT2G28910.1	miR414	876	5.5	0.550282	0.738033	no	CXIP4	miR414:CXIP4	0.879586
AT2G38040.2	miR396a-5p	1994	5.5	0.550282	0.738033	no	CAC3	miR396a-5p:CAC3	0.879586
AT3G18490.1	miR847	1195	5	1.10056	0.432929	no	ASPG1	miR847:ASPG1	0.879586
AT3G46600.3	miR414	456	6	0.550282	1	no	NA	miR414:AT3G46600.3	0.879586
AT3G54540.1	miR838	2156	5.5	0.550282	0.738033	no	ABCF4	miR838:ABCF4	0.879586
AT4G05180.1	miR8171	365	5.5	1.10056	0.79241	no	PSBQ	miR8171:PSBQ	0.879586
AT4G14900.1	miR156f-3p	661	5	0.550282	0.413253	no	NA	miR156f-3p:AT4G14900.1	0.879586
AT4G18020.6	miR5639-5p	2135	6	0.550282	1	no	APRR2	miR5639-5p:APRR2	0.879586
AT5G08690.1	miR3434-3p	385	6	0.550282	1	no	NA	miR3434-3p:AT5G08690.1	0.879586
AT5G27850.1	miR396b-5p	541	5	2.75141	0.344006	no	NA	miR396b-5p:AT5G27850.1	0.879586
AT5G47390.1	miR5021	911	6	0.550282	1	no	NA	miR5021:AT5G47390.1	0.879586
AT5G51010.1	miR413	526	6	0.550282	1	no	NA	miR413:AT5G51010.1	0.879586
AT5G61130.1	miR5021	106	5	0.550282	0.738033	no	PDCB1	miR5021:PDCB1	0.879586
AT5G62700.1	miR774a	138	5	0.550282	0.510626	no	TUB3	miR774a:TUB3	0.879586
AT1G50490.1	miR159b-5p	640	6	0.550282	1	no	UBC20	miR159b-5p:UBC20	0.887735
AT5G45670.1	miR5014b	979	5.5	0.550282	0.738033	no	NA	miR5014b:AT5G45670.1	0.894856
AT5G23940.1	miR5645a	976	5.5	1.10056	0.79241	no	DCR	miR5645a:DCR	0.905915
AT2G40460.1	miR8166	1325	6	0.550282	1	no	NA	miR8166:AT2G40460.1	0.913786
AT3G02468.1	miR854a	813	5	1.10056	0.432929	no	CPuORF9	miR854a:CPuORF9	0.925433
AT3G02470.4	miR854a	866	5	1.10056	0.432929	no	SAMDC	miR854a:SAMDC	0.925433
AT1G62480.1	miR838	473	5.5	1.65085	0.706628	no	NA	miR838:AT1G62480.1	0.931762
AT1G01610.1	miR774b-5p	330	5.5	0.550282	0.584824	no	ATGPAT4	miR774b-5p:ATGPAT4	0.942518
AT3G59020.2	miR414	2829	5.5	1.10056	0.637561	no	NA	miR414:AT3G59020.2	0.942518
AT2G35150.1	miR3440b-5p	838	5.5	0.550282	0.584824	no	EXL7	miR3440b-5p:EXL7	0.944428
AT5G59870.1	miR5654-3p	348	5.5	1.65085	0.706628	no	HTA6	miR5654-3p:HTA6	0.944428
AT2G13360.2	miR5021	1381	5.5	0.550282	0.738033	no	AGT	miR5021:AGT	0.947256
AT1G73230.1	miR157a-3p	238	5.5	0.550282	0.584824	no	NA	miR157a-3p:AT1G73230.1	0.948513
AT4G29030.1	miR841b-5p	609	6	1.10056	0.79241	no	NA	miR841b-5p:AT4G29030.1	0.952682
AT1G74800.1	miR5637	1961	5.5	0.550282	0.584824	no	NA	miR5637:AT1G74800.1	0.959553
AT2G39950.2	miR156f-3p	2023	6	0.550282	0.738033	no	NA	miR156f-3p:AT2G39950.2	0.959553
AT3G60530.1	miR5662	368	6	0.550282	0.738033	no	GATA4	miR5662:GATA4	0.959553
AT5G01260.2	miR5648-5p	1260	6	0.550282	0.738033	no	NA	miR5648-5p:AT5G01260.2	0.959553
AT5G15220.1	miR5662	222	6	0.550282	0.738033	no	NA	miR5662:AT5G15220.1	0.959553
AT5G15530.1	miR3434-3p	762	6	0.550282	0.738033	no	BCCP2	miR3434-3p:BCCP2	0.959553
AT1G10650.2	miR858a	1271	6	0.550282	0.738033	no	NA	miR858a:AT1G10650.2	0.959698
AT1G44780.2	miR414	1414	6	0.550282	0.738033	no	NA	miR414:AT1G44780.2	0.959698
AT2G01720.1	miR403-3p	849	6	0.550282	0.738033	no	NA	miR403-3p:AT2G01720.1	0.959698
AT3G01130.2	miR829-5p	173	5.5	0.550282	0.484292	no	NA	miR829-5p:AT3G01130.2	0.959698
AT3G19820.3	miR397b	1251	5.5	0.550282	0.484292	no	CBB1	miR397b:CBB1	0.959698
AT5G55120.1	miR167a-5p	1659	6	0.550282	0.738033	no	VTC5	miR167a-5p:VTC5	0.959698
AT5G64030.1	miR837-5p	2637	6	0.550282	0.738033	no	NA	miR837-5p:AT5G64030.1	0.959698
AT1G65295.1	miR854a	115	5	2.20113	0.092606	no	NA	miR854a:AT1G65295.1	0.962389
AT2G20890.1	miR838	906	5.5	1.10056	0.48831	no	PSB29	miR838:PSB29	0.962389
AT3G52470.1	miR5632-3p	906	6	0.550282	0.738033	no	NA	miR5632-3p:AT3G52470.1	0.962389
AT5G01400.1	miR414	4300	5.5	0.550282	0.484292	no	ESP4	miR414:ESP4	0.962389
AT1G68890.1	miR159b-5p	1444	6	0.550282	0.738033	no	PHYLLO	miR159b-5p:PHYLLO	0.9625
AT1G50480.1	miR829-5p	2037	5.5	0.550282	0.413253	no	THFS	miR829-5p:THFS	0.964012
AT1G75880.2	miR5634	408	5.5	0.550282	0.484292	no	NA	miR5634:AT1G75880.2	0.964012
AT1G55670.1	miR157d	654	5.5	0.550282	0.484292	no	PSAG	miR157d:PSAG	0.967856
AT3G56490.1	miR5663-5p	197	5.5	0.836429	0.48953	no	HINT1	miR5663-5p:HINT1	0.967856
AT5G01020.1	miR169g-3p	1344	5.5	0.550282	0.413253	no	NA	miR169g-3p:AT5G01020.1	0.976712
AT2G16600.2	miR773b-5p	405	5	1.10056	0.153814	no	ROC3	miR773b-5p:ROC3	0.980312
AT3G01390.2	miR837-5p	470	5.5	0.550282	0.413253	no	AVMA10	miR837-5p:AVMA10	0.981053
AT1G10390.2	miR837-5p	3322	6	0.550282	0.584824	no	NA	miR837-5p:AT1G10390.2	0.988265
AT1G52000.1	miR869.1	1329	6	0.550282	0.584824	no	NA	miR869.1:AT1G52000.1	0.988265
AT1G66070.2	miR774b-3p	271	6	0.550282	0.584824	no	NA	miR774b-3p:AT1G66070.2	0.988265
AT2G16600.2	miR414	538	5.5	1.10056	0.214244	no	ROC3	miR414:ROC3	0.988265
AT2G23350.1	miR854a	2192	5.5	0.0385197	0.324423	no	PAB4	miR854a:PAB4	0.988265
AT2G32260.1	miR414	1042	6	0.550282	0.584824	no	ATCCT1	miR414:ATCCT1	0.988265
AT3G04290.1	miR5661	669	5.5	0.550282	0.286969	no	ATLTL1	miR5661:ATLTL1	0.988265
AT3G15530.2	miR5021	41	6	1.10056	0.559939	no	NA	miR5021:AT3G15530.2	0.988265
AT3G20260.1	miR829-5p	2026	6	0.550282	0.584824	no	NA	miR829-5p:AT3G20260.1	0.988265
AT3G24495.1	miR1886.1	37	5.5	0.550282	0.286969	no	ATMSH7	miR1886.1:ATMSH7	0.988265
AT3G63130.2	miR847	1841	6	0.550282	0.584824	no	ATRANGAP1	miR847:ATRANGAP1	0.988265
AT4G04460.2	miR395b	931	6	0.550282	0.584824	no	NA	miR395b:AT4G04460.2	0.988265
AT4G09830.1	miR5012	603	5.5	0.550282	0.319516	no	NA	miR5012:AT4G09830.1	0.988265
AT4G13930.1	miR414	1592	5.5	0.550282	0.135332	no	SHM4	miR414:SHM4	0.988265
AT4G19110.3	miR5632-5p	1174	6	1.65085	0.616235	no	NA	miR5632-5p:AT4G19110.3	0.988265
AT4G19112.1	miR5632-5p	2258	6	1.65085	0.616235	no	CPuORF25	miR5632-5p:CPuORF25	0.988265
AT4G23490.1	miR164c-3p	1848	6	0.3907	0.662062	no	NA	miR164c-3p:AT4G23490.1	0.988265
AT5G05750.1	miR870-3p	1272	6	0.550282	0.584824	no	NA	miR870-3p:AT5G05750.1	0.988265
AT5G22480.1	miR831-3p	1555	6	0.550282	0.584824	no	NA	miR831-3p:AT5G22480.1	0.988265
AT5G30510.1	miR167a-5p	616	6	0.550282	0.584824	no	ARRPS1	miR167a-5p:ARRPS1	0.988265
AT5G33370.2	miR5663-3p	133	5.5	0.550282	0.26044	no	NA	miR5663-3p:AT5G33370.2	0.988265
AT5G43960.2	miR847	1450	6	1.10056	0.656193	no	NA	miR847:AT5G43960.2	0.988265
AT5G57020.1	miR3440b-5p	1483	6	0.550282	0.584824	no	ATNMT1	miR3440b-5p:ATNMT1	0.988265
AT5G64740.1	miR773b-3p	3248	6	1.10056	0.656193	no	CESA6	miR773b-3p:CESA6	0.988265
AT3G17160.1	miR847	291	6	0.280644	0.826072	no	NA	miR847:AT3G17160.1	0.993711
AT1G02205.3	miR774b-3p	1614	6	1.09506	0.431796	no	CER1	miR774b-3p:CER1	0.999994
AT1G07930.2	miR861-5p	503	6	0.550282	0.462052	no	NA	miR861-5p:AT1G07930.2	0.999994
AT1G11910.1	miR172d-5p	1558	6	1.10056	0.352885	no	APA1	miR172d-5p:APA1	0.999994
AT1G17745.2	miR839-5p	1917	6	0.550282	0.319516	no	PGDH	miR839-5p:PGDH	0.999994
AT1G24260.3	miR398a-5p	743	6	0.550282	0.484292	no	AGL9	miR398a-5p:AGL9	0.999994
AT1G30230.2	miR5665	662	6	0.550282	0.158119	no	eEF-1Bb1	miR5665:eEF-1Bb1	0.999994
AT1G52300.1	miR778	330	6	0.550282	0.0977627	no	NA	miR778:AT1G52300.1	0.999994
AT1G65295.1	miR5021	107	6	0.550282	0.0448484	no	NA	miR5021:AT1G65295.1	0.999994
AT2G10940.2	miR862-5p	726	6	1.65085	0.0986792	no	NA	miR862-5p:AT2G10940.2	0.999994
AT2G27800.1	miR172d-5p	1263	6	0.231118	0.328175	no	NA	miR172d-5p:AT2G27800.1	0.999994
AT2G39730.3	miR863-5p	420	6	0.550282	0.178112	no	RCA	miR863-5p:RCA	0.999994
AT2G47110.2	miR838	303	6	1.10056	0.465673	no	UBI6	miR838:UBI6	0.999994
AT3G01120.1	miR8177	1768	6	1.10056	0.559939	no	AtCGS1	miR8177:AtCGS1	0.999994
AT3G01500.3	miR5024-3p	748	6	1.65085	0.490693	no	ATBCA1	miR5024-3p:ATBCA1	0.999994
AT3G05220.2	miR847	1234	6	1.10056	0.48831	no	NA	miR847:AT3G05220.2	0.999994
AT3G06125.3	miR2111a-5p	132	6	0.550282	0.319516	no	NA	miR2111a-5p:AT3G06125.3	0.999994
AT3G08520.1	miR831-3p	29	6	1.39221	0.226687	no	NA	miR831-3p:AT3G08520.1	0.999994
AT3G28500.1	miR2936	237	6	1.10056	0.48831	no	NA	miR2936:AT3G28500.1	0.999994
AT3G29200.1	miR833a-5p	1182	6	1.10056	0.276267	no	ATCM1	miR833a-5p:ATCM1	0.999994
AT3G51160.1	miR839-5p	782	6	0.550282	0.484292	no	GMD2	miR839-5p:GMD2	0.999994
AT3G52590.1	miR5024-3p	122	6	1.65085	0.407646	no	EMB2167	miR5024-3p:EMB2167	0.999994
AT3G53420.2	miR5638b	946	6	0.550282	0.149716	no	AtPIP2;1	miR5638b:AtPIP2;1	0.999994
AT3G55330.1	miR839-5p	702	6	0.550282	0.00701127	no	PPL1	miR839-5p:PPL1	0.999994
AT3G56020.1	miR831-3p	71	6	1.90948	0.37479	no	NA	miR831-3p:AT3G56020.1	0.999994
AT3G58730.1	miR168b-3p	814	6	0.550282	0.238401	no	NA	miR168b-3p:AT3G58730.1	0.999994
AT3G62250.1	miR838	281	6	1.10056	0.323023	no	UBQ5	miR838:UBQ5	0.999994
AT4G24770.1	miR156a-3p	492	6	1.65085	0.490693	no	ATRBP31	miR156a-3p:ATRBP31	0.999994
AT4G38740.1	miR776	534	6	1.10056	0.137226	no	ROC1	miR776:ROC1	0.999994
AT5G07350.2	miR773a	2848	6	0.550282	0.484292	no	AtTudor1	miR773a:AtTudor1	0.999994
AT5G12150.2	miR2937	2773	6	0.550282	0.360389	no	NA	miR2937:AT5G12150.2	0.999994
AT5G18460.1	miR838	1663	6	0.550282	0.413253	no	NA	miR838:AT5G18460.1	0.999994
AT5G27300.2	miR172d-5p	933	6	0.319164	0.412093	no	NA	miR172d-5p:AT5G27300.2	0.999994
AT5G28640.1	miR779.1	944	6	0.550282	0.484292	no	AN3	miR779.1:AN3	0.999994
AT5G62210.1	miR2112-5p	659	6	0.550282	0.219802	no	NA	miR2112-5p:AT5G62210.1	0.999994
AT5G62560.1	miR156f-3p	1636	6	0.550282	0.484292	no	NA	miR156f-3p:AT5G62560.1	0.999994
AT5G64090.1	miR472-3p	1085	6	0.550282	0.484292	no	NA	miR472-3p:AT5G64090.1	0.999994

## Sheet: dcl234 (biorep #1)
Target transcript	miRNA	miRNA slice site position in target transcript	Allen score of sRNA:target duplex	Slice site RPM	Slice site RPM + 1/Maximum adjacent site RPM + 1	Previously verified by 5' RACE?	Target gene common name	Interaction name	P-value adjusted for multiple testing
AT1G27340.1	miR394a	1382	1	0.420033	1.42003	yes	LCR	miR394a:LCR	0
AT1G27360.4	miR156j	1309	0	0.618382	0.774005	no	SPL11	miR156j:SPL11	0
AT1G27370.4	miR156j	1324	0	0.653385	1.09674	no	SPL10	miR156j:SPL10	0
AT1G50055.1	miR173-5p	373	4.5	56.1328	35.5588	yes	TAS1b	miR173-5p:TAS1b	0
AT1G56010.2	miR164a	812	2	4.15366	5.15366	yes	anac021	miR164a:anac021	0
AT1G62590.1	miR161.2	1049	1	0.933407	1.93341	no	NA	miR161.2:AT1G62590.1	0
AT1G63330.1	miR161.2	774	1	0.75256	1.75256	no	NA	miR161.2:AT1G63330.1	0
AT1G77850.1	miR160a-5p	1419	0.5	14.5612	11.8334	yes	ARF17	miR160a-5p:ARF17	0
AT2G27400.1	miR173-5p	378	2.5	44.2785	45.2785	yes	TAS1a	miR173-5p:TAS1a	0
AT2G28350.1	miR160a-5p	1339	2	6.32383	7.32383	yes	ARF10	miR160a-5p:ARF10	0
AT2G33770.1	miR399a	953	1.5	0.472537	0.851559	yes	ATUBC24	miR399a:ATUBC24	0
AT2G39675.1	miR173-5p	378	2.5	442.266	261.634	yes	TAS1c	miR173-5p:TAS1c	0
AT2G39681.1	miR173-5p	417	2.5	197.34	100.168	yes	TAS2	miR173-5p:TAS2	0
AT2G45160.1	miR171a-3p	1013	0	38.1414	17.2739	yes	ATHAM1	miR171a-3p:ATHAM1	0
AT2G46800.2	miR856	435	2	0.834233	1.00963	no	ATCDF1	miR856:ATCDF1	0
AT3G57920.1	miR156j	854	0	0.63005	1.63005	yes	SPL15	miR156j:SPL15	0
AT3G60630.1	miR171a-3p	1055	0	22.1918	4.92365	yes	ATHAM2	miR171a-3p:ATHAM2	0
AT4G00150.1	miR171a-3p	866	0	10.2383	7.75482	yes	ATHAM3	miR171a-3p:ATHAM3	0
AT4G04630.1	miR414	465	0	0.437535	0.921471	no	NA	miR414:AT4G04630.1	0
AT4G36920.2	miR172c	1303	1	1.12592	1.18157	yes	AP2	miR172c:AP2	0
AT5G39610.1	miR164c-5p	780	3	3.51778	2.56077	no	ANAC092	miR164c-5p:ANAC092	0
AT5G43270.3	miR156j	1111	0	1.68597	1.7347	yes	SPL2	miR156j:SPL2	0
AT5G50570.2	miR156j	976	0	0.96841	1.96841	no	SPL13	miR156j:SPL13	0
AT5G50670.1	miR156j	1111	0	0.96841	1.96841	no	SPL13	miR156j:SPL13	0
AT5G60120.2	miR172a	1820	1	1.80848	2.80848	yes	TOE2	miR172a:TOE2	0
AT5G60760.1	miR447a-3p	1290	2.5	0.758393	1.15301	yes	NA	miR447a-3p:AT5G60760.1	0
AT4G30080.1	miR160a-5p	1518	2.5	7.37975	5.41196	yes	ARF16	miR160a-5p:ARF16	0.00357545
AT3G11810.1	miR414	1101	2.5	1.39428	1.78897	no	NA	miR414:AT3G11810.1	0.00450962
AT1G30490.1	miR165a-3p	805	3	1.11425	2.11425	yes	ATHB9	miR165a-3p:ATHB9	0.00465952
AT3G23690.1	miR393a-5p	416	3	3.82114	3.02257	yes	NA	miR393a-5p:AT3G23690.1	0.00901126
AT2G34710.1	miR165a-3p	880	3	1.83181	1.8498	yes	ATHB-14	miR165a-3p:ATHB-14	0.011817
AT2G22840.1	miR396a-5p	791	4	3.57612	3.60792	yes	AtGRF1	miR396a-5p:AtGRF1	0.0146152
AT3G62980.1	miR393a-5p	1721	2	2.28685	1.96029	yes	AtTIR1	miR393a-5p:AtTIR1	0.0276449
AT5G37020.2	miR167a-5p	2380	4	7.1989	3.85664	yes	ARF8	miR167a-5p:ARF8	0.0278283
AT5G07680.2	miR164a	661	2.5	1.95432	1.87968	yes	ANAC079	miR164a:ANAC079	0.0320116
AT1G31280.1	miR403-3p	3232	1	2.071	1.25812	yes	AGO2	miR403-3p:AGO2	0.0345027
AT1G06180.1	miR858a	402	3	1.20176	2.20176	yes	ATMYB13	miR858a:ATMYB13	0.0368738
AT4G13495.2	miR863-3p	755	3	1.18426	2.18426	no	NA	miR863-3p:AT4G13495.2	0.044443
AT1G63130.1	miR161.1	1102	2.5	0.513374	0.984815	yes	TAS8	miR161.1:TAS8	0.046942
AT1G12820.1	miR393a-5p	1894	4	7.46142	3.82276	yes	AFB3	miR393a-5p:AFB3	0.0481423
AT3G26810.1	miR393a-5p	2009	4	3.62862	3.08224	yes	AFB2	miR393a-5p:AFB2	0.0481423
AT5G60020.1	miR397a	752	2.5	0.618382	0.865799	yes	ATLAC17	miR397a:ATLAC17	0.0532797
AT2G36400.1	miR396a-5p	756	4	2.35685	2.39342	yes	AtGRF3	miR396a-5p:AtGRF3	0.0534498
AT2G45480.1	miR396a-5p	524	4	1.35927	2.35927	yes	AtGRF9	miR396a-5p:AtGRF9	0.0534498
AT3G17185.2	miR390a-5p	863	4.5	3.48278	2.83115	yes	TAS3a	miR390a-5p:TAS3a	0.0537129
AT1G69170.1	miR157a-5p	1307	2.5	0.635884	1.18112	no	SPL6	miR157a-5p:SPL6	0.0563331
AT1G10120.1	miR396a-5p	1316	5.5	3.88531	3.22809	yes	NA	miR396a-5p:AT1G10120.1	0.0602661
AT3G15030.3	miR319c	1310	3	0.892571	1.07989	yes	MEE35	miR319c:MEE35	0.0602661
AT5G37780.3	miR414	638	2.5	0.600881	0.395175	no	ACAM-1	miR414:ACAM-1	0.0629661
AT3G11440.1	miR159a	1165	3.5	0.735058	1.73506	yes	ATMYB65	miR159a:ATMYB65	0.0649806
AT1G30330.2	miR167a-5p	3246	5	4.45119	2.42444	no	ARF6	miR167a-5p:ARF6	0.0698794
AT3G52910.1	miR396a-5p	752	4	2.36852	1.98142	yes	AtGRF4	miR396a-5p:AtGRF4	0.0764388
AT1G48410.3	miR168a-5p	531	5	1.61013	2.61013	yes	AGO1	miR168a-5p:AGO1	0.0860645
AT5G06100.3	miR319a	1258	4	0.758393	1.75839	no	ATMYB33	miR319a:ATMYB33	0.0889052
AT4G03190.1	miR393a-5p	1597	3	1.2951	1.15569	yes	AFB1	miR393a-5p:AFB1	0.0980368
AT1G08125.3	miR390a-3p	887	5	7.1639	8.1639	no	NA	miR390a-3p:AT1G08125.3	0.10719
AT4G12610.2	miR414	898	3	0.665053	1.26618	no	ATRAP74	miR414:ATRAP74	0.10719
AT3G04260.1	miR414	2008	3	0.606715	0.935465	no	PDE324	miR414:PDE324	0.111988
AT4G24150.1	miR396a-5p	847	4	0.694222	1.69422	yes	AtGRF8	miR396a-5p:AtGRF8	0.115488
AT1G02860.2	miR827	268	1	0.309191	0.744538	yes	BAH1	miR827:BAH1	0.120451
AT4G37740.1	miR396a-5p	920	4	0.600881	1.60088	yes	AtGRF2	miR396a-5p:AtGRF2	0.147295
AT1G36370.1	miR824-5p	1170	4	0.659219	1.65922	no	SHM7	miR824-5p:SHM7	0.156775
AT2G43850.2	miR5014a-3p	1687	5	1.46428	2.46428	no	NA	miR5014a-3p:AT2G43850.2	0.156775
AT5G03495.1	miR414	963	5.5	1.2776	2.25133	no	NA	miR414:AT5G03495.1	0.158777
AT5G61430.1	miR164a	850	2.5	0.775895	0.826282	yes	ANAC100	miR164a:ANAC100	0.166618
AT5G57735.1	miR390a-5p	428	4.5	0.781729	1.78173	yes	TAS3c	miR390a-5p:TAS3c	0.168055
AT2G11910.2	miR414	502	3	0.805064	0.622045	no	NA	miR414:AT2G11910.2	0.201261
AT3G25900.3	miR852	543	5	1.18426	2.18426	no	ATHMT-1	miR852:ATHMT-1	0.201261
AT5G01600.1	miR164c-5p	534	3.5	1.44678	0.633161	no	ATFER1	miR164c-5p:ATFER1	0.219357
AT5G43470.2	miR172d-5p	1436	4	0.770061	1.77006	no	HRT	miR172d-5p:HRT	0.220471
AT2G44130.1	miR414	1246	3	0.641717	0.531558	no	NA	miR414:AT2G44130.1	0.223396
AT4G23680.1	miR5658	557	2	2.141	0.67775	no	NA	miR5658:AT4G23680.1	0.224905
AT1G20980.1	miR831-5p	3804	4.5	1.21343	2.21343	no	ATSPL14	miR831-5p:ATSPL14	0.238725
AT1G51760.1	miR167a-5p	862	3	0.390864	0.69223	no	IAR3	miR167a-5p:IAR3	0.238898
AT4G02725.2	miR4240	351	4	0.408366	1.40837	no	NA	miR4240:AT4G02725.2	0.238898
AT5G19950.3	miR167a-5p	1209	4	0.443368	1.44337	no	NA	miR167a-5p:AT5G19950.3	0.238898
AT1G63670.3	miR172d-5p	2209	4.5	0.875069	1.87507	no	TRM12	miR172d-5p:TRM12	0.239134
AT1G17840.1	miR1886.1	237	5	1.02675	2.02675	no	ABCG11	miR1886.1:ABCG11	0.243794
AT3G29020.2	miR5658	838	4	0.472537	1.47254	no	AtMYB110	miR5658:AtMYB110	0.251607
AT1G69490.1	miR781a	421	3.5	0.554211	0.847336	no	ANAC029	miR781a:ANAC029	0.257907
AT2G33430.1	miR414	783	3.5	0.688388	1	no	DAL	miR414:DAL	0.259583
AT3G25520.2	miR414	699	3.5	1.64513	0.822276	no	ATL5	miR414:ATL5	0.260491
AT3G28007.1	miR414	782	3.5	0.67672	0.820213	no	AtSWEET4	miR414:AtSWEET4	0.260491
AT1G11950.1	miR844-5p	1441	4	1.12592	1.6095	no	NA	miR844-5p:AT1G11950.1	0.266971
AT1G32500.1	miR162a-3p	1470	3.5	0.595047	0.989147	no	ABCI7	miR162a-3p:ABCI7	0.266971
AT1G47960.1	miR414	122	3.5	0.670886	0.969534	no	ATC/VIF1	miR414:ATC/VIF1	0.266971
AT5G38840.1	miR414	1153	3.5	0.600881	0.789876	no	NA	miR414:AT5G38840.1	0.277063
AT3G54190.1	miR841b-3p	755	4	1.19009	1.2212	no	NA	miR841b-3p:AT3G54190.1	0.287257
AT1G17760.1	miR858a	1731	4	0.536709	1.53671	no	ATCSTF77	miR858a:ATCSTF77	0.307133
AT5G58880.1	miR5656	1066	5	0.63005	1.63005	no	NA	miR5656:AT5G58880.1	0.315841
AT5G42490.1	miR779.1	2099	5	0.717557	1.71756	no	NA	miR779.1:AT5G42490.1	0.32443
AT5G08280.1	miR397b	652	3.5	0.50754	0.809026	no	HEMC	miR397b:HEMC	0.326476
AT2G32070.1	miR5658	149	3	0.495873	0.59574	no	NA	miR5658:AT2G32070.1	0.335332
AT1G06040.2	miR1886.1	706	3.5	1.23676	0.872555	no	BBX24	miR1886.1:BBX24	0.346589
AT5G64816.2	miR5021	491	2.5	0.560044	0.829412	no	NA	miR5021:AT5G64816.2	0.347433
AT3G57200.1	miR8180	144	5.5	0.781729	1.78173	no	NA	miR8180:AT3G57200.1	0.348177
AT5G01350.1	miR172b-5p	447	5.5	2.87606	1.85894	no	NA	miR172b-5p:AT5G01350.1	0.364407
AT1G68910.3	miR403-5p	1315	4	0.612548	0.917058	no	WIT2	miR403-5p:WIT2	0.369491
AT1G73090.2	miR4239	528	4.5	1.2951	1.35934	no	NA	miR4239:AT1G73090.2	0.370713
AT1G14670.1	miR396a-5p	404	4.5	0.653385	1.65339	no	NA	miR396a-5p:AT1G14670.1	0.385608
AT1G47550.2	miR837-5p	1763	4.5	1.32427	1.38139	no	SEC3A	miR837-5p:SEC3A	0.397363
AT1G35310.1	miR414	288	4.5	8.26649	1.29835	no	MLP168	miR414:MLP168	0.406086
AT1G68440.1	miR414	419	4.5	1.31844	1.29698	no	NA	miR414:AT1G68440.1	0.406086
AT4G29840.1	miR162a-5p	1245	4.5	0.705889	1.01037	no	MTO2	miR162a-5p:MTO2	0.426989
AT2G27100.1	miR833b	625	4.5	0.758393	1.11464	no	SE	miR833b:SE	0.453634
AT1G62390.1	miR866-3p	1222	4	0.425867	1.42587	no	CLMP1	miR866-3p:CLMP1	0.458818
AT5G09640.1	miR1886.1	1469	4	0.390864	1.03025	no	SCPL19	miR1886.1:SCPL19	0.46266
AT1G74260.1	miR401	3410	4	0.577546	0.909218	no	PUR4	miR401:PUR4	0.468316
AT4G02510.1	miR5644	3748	4	0.513374	0.9121	no	ATTOC159	miR5644:ATTOC159	0.482864
AT5G04590.1	miR172e-3p	376	4.5	0.478371	1.47837	no	SIR	miR172e-3p:SIR	0.49254
AT2G39770.2	miR773b-3p	378	4	1.23676	0.876545	no	CYT1	miR773b-3p:CYT1	0.494088
AT2G41720.2	miR161.2	962	4.5	0.659219	1.15421	no	EMB2654	miR161.2:EMB2654	0.495248
AT4G09010.1	miR5630a	977	4	0.560044	0.693837	no	APX4	miR5630a:APX4	0.495248
AT1G20370.1	miR5014b	645	5	0.758393	1.75839	no	NA	miR5014b:AT1G20370.1	0.503055
AT3G02950.1	miR837-5p	599	4.5	0.530875	1.53087	no	AtTHO7	miR837-5p:AtTHO7	0.503261
AT1G69670.1	miR858b	1750	5.5	1.01508	2.01508	no	ATCUL3B	miR858b:ATCUL3B	0.505742
AT3G14560.1	miR824-5p	294	4.5	3.02774	1.25208	no	NA	miR824-5p:AT3G14560.1	0.509147
AT5G65060.2	miR2112-3p	717	5	0.67672	1.67672	no	AGL70	miR2112-3p:AGL70	0.510438
AT3G07370.1	miR837-5p	1123	5	0.711723	1.71172	no	ATCHIP	miR837-5p:ATCHIP	0.513712
AT1G12920.1	miR856	1359	4	0.58338	0.844438	no	ERF1-2	miR856:ERF1-2	0.537721
AT1G65440.3	miR414	246	4	0.740892	0.747129	no	GTB1	miR414:GTB1	0.537721
AT3G51400.1	miR1886.1	155	5	2.37435	1.48154	no	NA	miR1886.1:AT3G51400.1	0.537721
AT4G13110.1	miR5021	184	4	1.14342	1.32442	no	NA	miR5021:AT4G13110.1	0.537721
AT5G20840.1	miR5644	2302	5.5	1.38261	1.51033	no	NA	miR5644:AT5G20840.1	0.537721
AT5G55490.1	miR5021	207	4.5	0.624216	1.62422	no	ATGEX1	miR5021:ATGEX1	0.538122
AT5G64920.1	miR5666	99	5	0.723391	1.72339	no	CIP8	miR5666:CIP8	0.538122
AT1G69030.1	miR414	856	4	0.478371	0.713011	no	NA	miR414:AT1G69030.1	0.55616
AT5G15870.1	miR414	2152	4.5	0.974244	1	no	NA	miR414:AT5G15870.1	0.55616
AT3G61490.3	miR157a-3p	1262	6	1.19009	2.19009	no	NA	miR157a-3p:AT3G61490.3	0.574397
AT2G40300.1	miR5655	886	3.5	0.810898	0.693796	no	ATFER4	miR5655:ATFER4	0.580844
AT1G20910.1	miR831-3p	866	5	0.554211	1.55421	no	NA	miR831-3p:AT1G20910.1	0.596934
AT3G08040.2	miR5021	1192	6	0.75256	1.75256	no	ATFRD3	miR5021:ATFRD3	0.596934
AT3G23810.1	miR172d-5p	976	3.5	0.110842	0.376006	no	ATSAHH2	miR172d-5p:ATSAHH2	0.601323
AT3G27830.1	miR418	201	4	1.44095	0.967625	no	RPL12	miR418:RPL12	0.601323
AT1G56190.2	miR164c-5p	217	4.5	0.525042	0.932243	no	NA	miR164c-5p:AT1G56190.2	0.606481
AT5G40440.1	miR419	1362	5	0.536709	1.53671	no	ATMKK3	miR419:ATMKK3	0.62955
AT1G19870.1	miR4227	2242	4	0.542543	0.895063	no	iqd32	miR4227:iqd32	0.629883
AT1G02070.1	miR5636	71	5	0.863402	1.12306	no	NA	miR5636:AT1G02070.1	0.634678
AT3G02750.3	miR5024-5p	2114	4	0.682554	0.872887	no	NA	miR5024-5p:AT3G02750.3	0.634678
AT1G29320.1	miR396b-3p	1053	6	0.723391	1.72339	no	NA	miR396b-3p:AT1G29320.1	0.637974
AT1G74260.1	miR5028	3488	5.5	0.659219	1.65922	no	PUR4	miR5028:PUR4	0.637974
AT2G11910.2	miR414	442	4	0.350028	0.575065	no	NA	miR414:AT2G11910.2	0.641602
AT1G01230.1	miR156g	264	4	0.670886	0.976143	no	NA	miR156g:AT1G01230.1	0.649769
AT2G47850.3	miR846-5p	1757	6	0.793396	1.7934	no	NA	miR846-5p:AT2G47850.3	0.649769
AT3G55620.1	miR776	658	4.5	1.06175	1.07941	no	eIF6A	miR776:eIF6A	0.649769
[truncated: 330 more rows]

[truncated: 20 more sheets: dcl234 (biorep #2), dcl234 (biorep #3), flowers (biorep #1), flowers (biorep #2), flowers (biorep #3), sepals (biorep #1), sepals (biorep #2), sepals (biorep #3), petals (biorep #1), petals (biorep #2), petals (biorep #3), anthers (biorep #1), anthers (biorep #2), anthers (biorep #3), stigmas (biorep #1), stigmas (biorep #2), stigmas (biorep #3), ovules (biorep #1), ovules (biorep #2), ovules (biorep #3)]
