# Supplementary material for: NanoPARE: parallel analysis of RNA 5′ ends from low-input RNA
Source: Genome Res. 2018 Dec;28(12):1931–42. doi: 10.1101/gr.239202.118 (PMC6280765; doi:10.1101/gr.239202.118)
Supplement: Supplemental Material [file supp_gr.239202.118_Supplemental_Data_S5.xlsx]

## Sheet: Col-0 (-Xrn1) (biorep #1)
Supplemental Data S5. tasiRNA cleavage sites identified from capmasked nanoPARE libraries
RPM: Reads per million transcriptome-mapping reads
Target transcript	tasiRNA	tasiRNA slice site position in target transcript	Allen score of sRNA:target duplex	Slice site RPM	Slice site RPM + 1/Maximum adjacent site RPM + 1	Previously verified by 5' RACE?	Target gene common name	Interaction name	P-value adjusted for multiple testing
AT2G33860.1	TAS3C-5'D5[+]	1685	1.5	0.384343	1.38434	yes	ARF3	TAS3C-5'D5[+]:ARF3	0
AT5G60450.1	TAS3A-5'D8[+]	1884	1	0.557298	1.17382	yes	ARF4	TAS3A-5'D8[+]:ARF4	0
AT5G60450.1	TAS3A-5'D7[+]	2094	1.5	0.280571	1.09895	yes	ARF4	TAS3A-5'D7[+]:ARF4	0
AT5G18040.1	TAS1A-3'D2[+]	685	2	1.80257	1.2811	yes	NA	TAS1A-3'D2[+]:AT5G18040.1	0.04528
AT2G25930.1	TAS3C-5'D10[+]	2440	5	13.0715	8.73406	no	ELF3	TAS3C-5'D10[+]:ELF3	0.507422
AT1G07670.1	TAS3A-5'D2[+]	282	3.5	0.280571	1.28057	no	ATECA4	TAS3A-5'D2[+]:ATECA4	0.516985
AT5G60120.2	TAS3B-5'D9[+]	1693	3	0.322848	0.821081	no	TOE2	TAS3B-5'D9[+]:TOE2	0.900363
AT5G57040.1	TAS2-3'D2[-]	760	2	0.395874	0.842295	no	NA	TAS2-3'D2[-]:AT5G57040.1	0.958023
AT1G01630.1	TAS3C-5'D9[+]	856	5.5	1.56428	0.787531	no	NA	TAS3C-5'D9[+]:AT1G01630.1	0.999941
AT1G01820.1	TAS1A-3'D2[-]	823	6	0.230606	0.531706	no	PEX11C	TAS1A-3'D2[-]:PEX11C	0.999941
AT1G02190.2	TAS3A-5'D4[+]	1614	6	0.295944	0.711082	no	NA	TAS3A-5'D4[+]:AT1G02190.2	0.999941
AT1G02500.2	TAS3B-5'D7[-]	1326	6	0.280571	0.222987	no	AtSAM1	TAS3B-5'D7[-]:AtSAM1	0.999941
AT1G04770.1	TAS3A-5'D8[+]	931	5.5	0.326692	0.845658	no	NA	TAS3A-5'D8[+]:AT1G04770.1	0.999941
AT1G04810.1	TAS3B-5'D10[+]	2247	6	0.222919	0.871297	no	NA	TAS3B-5'D10[+]:AT1G04810.1	0.999941
AT1G07320.4	TAS1B-3'D4[-]	853	6	0.684131	0.112062	no	EMB2784	TAS1B-3'D4[-]:EMB2784	0.999941
AT1G07750.1	TAS4-3'D9[+]	870	6	0.422778	0.469668	no	NA	TAS4-3'D9[+]:AT1G07750.1	0.999941
AT1G08510.1	TAS3B-5'D7[+]	1537	4.5	0.530394	0.625895	no	FATB	TAS3B-5'D7[+]:FATB	0.999941
AT1G08820.2	TAS3A-5'D1[+]	111	5.5	0.13452	0.867718	no	VAP27-2	TAS3A-5'D1[+]:VAP27-2	0.999941
AT1G10670.4	TAS4-3'D4[+]	690	5.5	1.73339	1.24948	no	ACLA-1	TAS4-3'D4[+]:ACLA-1	0.999941
AT1G11860.3	TAS3B-5'D1[+]	1447	6	1.45666	0.580979	no	NA	TAS3B-5'D1[+]:AT1G11860.3	0.999941
AT1G11910.1	TAS4-3'D7[-]	1668	5	0.438151	0.361118	no	APA1	TAS4-3'D7[-]:APA1	0.999941
AT1G12090.1	TAS4-3'D7[+]	784	5.5	1.04541	0.0912181	no	ELP	TAS4-3'D7[+]:ELP	0.999941
AT1G12140.2	TAS3C-5'D4[-]	1441	5.5	0.203702	0.57551	no	FMO GS-OX5	TAS3C-5'D4[-]:FMO GS-OX5	0.999941
AT1G12800.1	TAS1C-3'D7[-]	1774	6	0.933954	0.898248	no	NA	TAS1C-3'D7[-]:AT1G12800.1	0.999941
AT1G12850.1	TAS3C-5'D3[+]	80	5.5	0.280571	0.693868	no	NA	TAS3C-5'D3[+]:AT1G12850.1	0.999941
AT1G12930.1	TAS3A-5'D6[+]	3073	6	0.388187	1.09058	no	NA	TAS3A-5'D6[+]:AT1G12930.1	0.999941
AT1G13020.1	TAS3B-5'D7[+]	1893	5	0.36897	0.962181	no	EIF4B2	TAS3B-5'D7[+]:EIF4B2	0.999941
AT1G13690.1	TAS3C-5'D3[+]	550	5.5	0.24598	0.521043	no	ATE1	TAS3C-5'D3[+]:ATE1	0.999941
AT1G14460.1	TAS3C-5'D9[+]	160	4.5	0.00384343	0.578886	no	NA	TAS3C-5'D9[+]:AT1G14460.1	0.999941
AT1G15270.1	TAS3B-5'D9[+]	207	6	4.51219	0.437226	no	NA	TAS3B-5'D9[+]:AT1G15270.1	0.999941
AT1G16705.2	TAS2-3'D5[+]	344	6	0.315162	0.902422	no	NA	TAS2-3'D5[+]:AT1G16705.2	0.999941
AT1G17490.1	TAS1A-3'D5[+]	342	6	0.322848	0.398277	no	NA	TAS1A-3'D5[+]:AT1G17490.1	0.999941
AT1G17950.1	TAS4-3'D7[+]	892	5	0.12299	1.12299	no	ATMYB52	TAS4-3'D7[+]:ATMYB52	0.999941
AT1G21350.3	TAS1B-3'D10[+]	805	6	0.211389	0.650959	no	NA	TAS1B-3'D10[+]:AT1G21350.3	0.999941
AT1G22882.1	TAS1B-3'D4[-]	2017	5	0.0653384	0.593308	no	NA	TAS1B-3'D4[-]:AT1G22882.1	0.999941
AT1G23190.1	TAS3C-5'D9[+]	1230	5	0.39203	0.643101	no	PGM3	TAS3C-5'D9[+]:PGM3	0.999941
AT1G23190.1	TAS3B-5'D6[+]	1786	6	1.77951	1.08719	no	PGM3	TAS3B-5'D6[+]:PGM3	0.999941
AT1G24260.3	TAS3B-5'D7[-]	1038	5	0.26904	0.310854	no	AGL9	TAS3B-5'D7[-]:AGL9	0.999941
AT1G26710.1	TAS3B-5'D6[+]	589	5.5	0.522707	1.02856	no	NA	TAS3B-5'D6[+]:AT1G26710.1	0.999941
AT1G26761.1	TAS1B-3'D4[-]	1292	4	0.153737	0.465269	no	NA	TAS1B-3'D4[-]:AT1G26761.1	0.999941
AT1G27750.1	TAS3B-5'D3[+]	3223	5	0.288258	0.811223	no	NA	TAS3B-5'D3[+]:AT1G27750.1	0.999941
AT1G27752.2	TAS4-3'D4[+]	2675	4.5	0.207545	0.344053	no	NA	TAS4-3'D4[+]:AT1G27752.2	0.999941
AT1G28340.1	TAS4-3'D4[+]	559	5	0.361283	0.903107	no	AtRLP4	TAS4-3'D4[+]:AtRLP4	0.999941
AT1G30360.1	TAS2-3'D3[+]	2344	5.5	0.534237	0.619673	no	ERD4	TAS2-3'D3[+]:ERD4	0.999941
AT1G31330.1	TAS3C-5'D1[+]	358	5	0.215232	0.0821647	no	PSAF	TAS3C-5'D1[+]:PSAF	0.999941
AT1G32130.2	TAS4-3'D2[-]	278	5	0.299788	0.766537	no	ATIWS1	TAS4-3'D2[-]:ATIWS1	0.999941
AT1G42550.1	TAS3A-5'D1[+]	2397	4.5	0.457369	0.833035	no	PMI1	TAS3A-5'D1[+]:PMI1	0.999941
AT1G43170.9	TAS2-3'D8[-]	1172	5	0.388187	0.144811	no	ARP1	TAS2-3'D8[-]:ARP1	0.999941
AT1G44760.1	TAS1A-3'D8[-]	386	6	0.810965	0.585188	no	NA	TAS1A-3'D8[-]:AT1G44760.1	0.999941
AT1G45160.2	TAS1A-3'D9[+]	3514	5.5	0.418934	0.95351	no	NA	TAS1A-3'D9[+]:AT1G45160.2	0.999941
AT1G47830.1	TAS2-3'D4[-]	246	4	0.24598	0.731489	no	NA	TAS2-3'D4[-]:AT1G47830.1	0.999941
AT1G50920.1	TAS4-3'D2[-]	1957	5	0.14605	0.48948	no	NA	TAS4-3'D2[-]:AT1G50920.1	0.999941
AT1G52670.1	TAS2-3'D3[-]	1010	4.5	0.415091	0.632417	no	NA	TAS2-3'D3[-]:AT1G52670.1	0.999941
AT1G53910.3	TAS3C-5'D2[-]	1460	4.5	0.453525	0.431134	no	RAP2.12	TAS3C-5'D2[-]:RAP2.12	0.999941
AT1G54060.1	TAS3B-5'D7[+]	1148	5.5	0.165268	0.814608	no	ASIL1	TAS3B-5'D7[+]:ASIL1	0.999941
AT1G54570.1	TAS3C-5'D4[+]	1791	5	0.572672	0.951184	no	PES1	TAS3C-5'D4[+]:PES1	0.999941
AT1G56070.1	TAS1C-3'D6[-]	2382	5	2.04086	0.326371	no	LOS1	TAS1C-3'D6[-]:LOS1	0.999941
AT1G56210.1	TAS3A-5'D2[-]	1142	5.5	0.434308	0.992025	no	NA	TAS3A-5'D2[-]:AT1G56210.1	0.999941
AT1G56280.2	TAS3B-5'D7[+]	853	5.5	0.480429	0.515515	no	ATDI19	TAS3B-5'D7[+]:ATDI19	0.999941
AT1G58602.2	TAS1C-3'D7[-]	707	4.5	0.376657	1.20526	no	NA	TAS1C-3'D7[-]:AT1G58602.2	0.999941
AT1G60810.1	TAS1C-3'D7[+]	365	5	0.153737	0.810904	no	ACLA-2	TAS1C-3'D7[+]:ACLA-2	0.999941
AT1G62360.1	TAS1A-3'D8[-]	1053	3.5	0.153737	0.608665	no	BUM	TAS1A-3'D8[-]:BUM	0.999941
AT1G64330.1	TAS3C-5'D2[-]	1889	4.5	0.319005	0.922081	no	NA	TAS3C-5'D2[-]:AT1G64330.1	0.999941
AT1G64430.2	TAS1B-3'D7[-]	748	6	0.376657	1.03168	no	NA	TAS1B-3'D7[-]:AT1G64430.2	0.999941
AT1G65010.1	TAS1A-3'D9[-]	390	4	0.303631	0.668759	no	NA	TAS1A-3'D9[-]:AT1G65010.1	0.999941
AT1G65295.1	TAS4-3'D9[+]	215	4.5	0.330535	0.592595	no	NA	TAS4-3'D9[+]:AT1G65295.1	0.999941
AT1G65960.2	TAS3B-5'D6[+]	1452	6	1.38364	0.433035	no	GAD2	TAS3B-5'D6[+]:GAD2	0.999941
AT1G66350.1	TAS1C-3'D7[-]	1591	5	1.13381	0.468436	no	RGL	TAS1C-3'D7[-]:RGL	0.999941
AT1G66760.2	TAS3C-5'D3[+]	218	6	0.176798	1.1768	no	NA	TAS3C-5'D3[+]:AT1G66760.2	0.999941
AT1G67840.2	TAS3A-5'D6[-]	1915	6	0.24598	0.580784	no	CSK	TAS3A-5'D6[-]:CSK	0.999941
AT1G71300.1	TAS4-3'D2[-]	1919	5.5	0.165268	1.16527	no	NA	TAS4-3'D2[-]:AT1G71300.1	0.999941
AT1G72260.1	TAS2-3'D3[+]	140	6	0.338222	0.703141	no	THI2.1	TAS2-3'D3[+]:THI2.1	0.999941
AT1G73480.1	TAS3C-5'D3[+]	1878	5	0.334379	1.01461	no	NA	TAS3C-5'D3[+]:AT1G73480.1	0.999941
AT1G73760.1	TAS4-3'D4[+]	1036	6	0.530394	0.80574	no	NA	TAS4-3'D4[+]:AT1G73760.1	0.999941
AT1G74030.1	TAS3C-5'D4[+]	760	5	0.51502	1.02072	no	ENO1	TAS3C-5'D4[+]:ENO1	0.999941
AT1G74160.1	TAS3C-5'D9[+]	524	6	0.119146	0.646811	no	TRM4	TAS3C-5'D9[+]:TRM4	0.999941
AT1G75270.1	TAS1C-3'D9[+]	199	6	0.49196	0.8256	no	DHAR2	TAS1C-3'D9[+]:DHAR2	0.999941
AT1G75550.1	TAS3A-5'D1[+]	289	6	0.138364	0.660854	no	NA	TAS3A-5'D1[+]:AT1G75550.1	0.999941
AT1G75950.1	TAS4-3'D4[+]	215	6	0.933954	0.919586	no	ASK1	TAS4-3'D4[+]:ASK1	0.999941
AT1G79060.1	TAS1A-3'D7[-]	1110	5.5	0.211389	0.853732	no	NA	TAS1A-3'D7[-]:AT1G79060.1	0.999941
AT1G80000.2	TAS3C-5'D10[+]	357	5.5	0.00768687	0.753004	no	NA	TAS3C-5'D10[+]:AT1G80000.2	0.999941
AT2G01250.2	TAS3B-5'D7[+]	156	5.5	0.319005	0.307462	no	NA	TAS3B-5'D7[+]:AT2G01250.2	0.999941
AT2G01850.1	TAS3C-5'D10[+]	917	6	0.553454	0.943949	no	ATXTH27	TAS3C-5'D10[+]:ATXTH27	0.999941
AT2G03680.2	TAS4-3'D2[-]	310	5.5	1.7257	1.113	no	SKU6	TAS4-3'D2[-]:SKU6	0.999941
AT2G07675.1	TAS4-3'D9[+]	34	6	0.24598	0.762456	no	NA	TAS4-3'D9[+]:AT2G07675.1	0.999941
AT2G07773.1	TAS4-3'D9[+]	34	6	0.0153737	0.929623	no	NA	TAS4-3'D9[+]:AT2G07773.1	0.999941
AT2G16640.1	TAS4-3'D9[+]	2591	5	0.00768687	0.54944	no	ATTOC132	TAS4-3'D9[+]:ATTOC132	0.999941
AT2G16770.1	TAS3B-5'D8[+]	694	5	0.357439	0.891464	no	bZIP23	TAS3B-5'D8[+]:bZIP23	0.999941
AT2G18020.1	TAS3C-5'D10[-]	425	6	1.12228	0.481758	no	EMB2296	TAS3C-5'D10[-]:EMB2296	0.999941
AT2G19540.1	TAS4-3'D8[-]	609	5.5	0.322848	0.629008	no	NA	TAS4-3'D8[-]:AT2G19540.1	0.999941
AT2G19760.1	TAS2-3'D3[-]	645	4	0.13452	0.472912	no	PFN1	TAS2-3'D3[-]:PFN1	0.999941
AT2G20370.1	TAS3A-5'D10[+]	2219	6	0.288258	0.705378	no	AtMUR3	TAS3A-5'D10[+]:AtMUR3	0.999941
AT2G20580.1	TAS1C-3'D8[+]	861	6	0.234449	0.996896	no	ATRPN1A	TAS1C-3'D8[+]:ATRPN1A	0.999941
AT2G20890.1	TAS4-3'D2[+]	206	6	0.607263	0.878198	no	PSB29	TAS4-3'D2[+]:PSB29	0.999941
AT2G21660.2	TAS4-3'D2[-]	542	5.5	6.97968	0.274839	no	ATGRP7	TAS4-3'D2[-]:ATGRP7	0.999941
AT2G22795.1	TAS3B-5'D9[+]	1697	5.5	0.14605	0.220847	no	NA	TAS3B-5'D9[+]:AT2G22795.1	0.999941
AT2G24360.1	TAS3C-5'D3[+]	1643	6	0.553454	0.798492	no	NA	TAS3C-5'D3[+]:AT2G24360.1	0.999941
AT2G25210.1	TAS3C-5'D4[-]	298	4	2.06008	0.51427	no	NA	TAS3C-5'D4[-]:AT2G25210.1	0.999941
AT2G26800.3	TAS2-3'D4[+]	1037	6	0.349752	0.712075	no	NA	TAS2-3'D4[+]:AT2G26800.3	0.999941
AT2G28790.1	TAS4-3'D2[+]	381	6	0.476586	0.67855	no	NA	TAS4-3'D2[+]:AT2G28790.1	0.999941
AT2G28910.1	TAS3B-5'D7[+]	809	6	0.357439	0.518484	no	CXIP4	TAS3B-5'D7[+]:CXIP4	0.999941
AT2G30520.3	TAS1A-3'D10[-]	1670	5.5	0.119146	0.421283	no	RPT2	TAS1A-3'D10[-]:RPT2	0.999941
AT2G30570.1	TAS3B-5'D7[+]	263	6	0.711035	0.0309431	no	PSBW	TAS3B-5'D7[+]:PSBW	0.999941
AT2G30630.2	TAS3B-5'D7[+]	1290	6	0.226763	1.22676	no	NA	TAS3B-5'D7[+]:AT2G30630.2	0.999941
AT2G31360.1	TAS3B-5'D9[+]	1005	6	0.707192	0.550288	no	ADS2	TAS3B-5'D9[+]:ADS2	0.999941
AT2G34660.2	TAS3C-5'D10[-]	4840	4	0.211389	0.635216	no	ABCC2	TAS3C-5'D10[-]:ABCC2	0.999941
AT2G35650.1	TAS3C-5'D2[+]	1545	4.5	0.576515	1.17807	no	ATCSLA07	TAS3C-5'D2[+]:ATCSLA07	0.999941
AT2G36160.1	TAS1B-3'D4[-]	536	5.5	1.4067	0.400071	no	NA	TAS1B-3'D4[-]:AT2G36160.1	0.999941
AT2G37340.3	TAS3B-5'D7[+]	860	6	0.457369	0.861422	no	AT-RS2Z33	TAS3B-5'D7[+]:AT-RS2Z33	0.999941
AT2G37420.1	TAS3C-5'D3[+]	1379	6	0.26904	1.26904	no	NA	TAS3C-5'D3[+]:AT2G37420.1	0.999941
AT2G38080.1	TAS4-3'D7[+]	1937	4	0.176798	0.552495	no	ATLMCO4	TAS4-3'D7[+]:ATLMCO4	0.999941
AT2G39470.3	TAS3C-5'D3[+]	749	5.5	0.149894	0.30617	no	PnsL1	TAS3C-5'D3[+]:PnsL1	0.999941
AT2G39770.2	TAS4-3'D10[-]	1243	6	0.180641	0.366488	no	CYT1	TAS4-3'D10[-]:CYT1	0.999941
AT2G40205.1	TAS3B-5'D9[-]	105	4	1.6373	0.520552	no	NA	TAS3B-5'D9[-]:AT2G40205.1	0.999941
AT2G42600.2	TAS2-3'D9[+]	2642	6	0.561141	0.694112	no	ATPPC2	TAS2-3'D9[+]:ATPPC2	0.999941
AT2G43235.1	TAS3B-5'D6[+]	1188	5.5	0.172955	0.786184	no	NA	TAS3B-5'D6[+]:AT2G43235.1	0.999941
AT2G44730.1	TAS3C-5'D6[+]	1200	5.5	0.403561	0.978563	no	NA	TAS3C-5'D6[+]:AT2G44730.1	0.999941
AT2G46000.1	TAS3B-5'D6[+]	717	5	0.511177	0.755856	no	NA	TAS3B-5'D6[+]:AT2G46000.1	0.999941
AT3G02080.1	TAS1C-3'D7[-]	447	5	1.58734	0.355959	no	NA	TAS1C-3'D7[-]:AT3G02080.1	0.999941
AT3G02230.1	TAS3A-5'D4[-]	1223	3.5	1.07232	0.207524	no	ATRGP1	TAS3A-5'D4[-]:ATRGP1	0.999941
AT3G03050.1	TAS3C-5'D8[+]	4078	4.5	0.734096	0.564556	no	ATCSLD3	TAS3C-5'D8[+]:ATCSLD3	0.999941
AT3G04920.1	TAS3A-5'D8[+]	255	5	0.599576	0.458765	no	NA	TAS3A-5'D8[+]:AT3G04920.1	0.999941
AT3G05020.1	TAS3C-5'D3[+]	258	5.5	0.807121	0.192605	no	ACP	TAS3C-5'D3[+]:ACP	0.999941
AT3G05932.1	TAS3A-5'D6[+]	932	5	0.422778	1.42278	no	NA	TAS3A-5'D6[+]:AT3G05932.1	0.999941
AT3G06760.2	TAS3C-5'D8[-]	858	6	0.761	1.1116	no	NA	TAS3C-5'D8[-]:AT3G06760.2	0.999941
AT3G09740.1	TAS3C-5'D4[-]	938	4.5	1.47204	0.908217	no	ATSYP71	TAS3C-5'D4[-]:ATSYP71	0.999941
AT3G09810.1	TAS3C-5'D10[-]	948	5	0.518864	1.15827	no	IDH-VI	TAS3C-5'D10[-]:IDH-VI	0.999941
AT3G09860.1	TAS3A-5'D4[-]	455	4	1.03388	0.592469	no	NA	TAS3A-5'D4[-]:AT3G09860.1	0.999941
AT3G10570.1	TAS4-3'D9[+]	1554	6	0.36897	0.143554	no	CYP77A6	TAS4-3'D9[+]:CYP77A6	0.999941
AT3G12110.1	TAS3C-5'D1[+]	804	6	0.549611	0.901607	no	ACT11	TAS3C-5'D1[+]:ACT11	0.999941
AT3G12260.1	TAS3A-5'D4[-]	259	6	0.292101	0.272173	no	NA	TAS3A-5'D4[-]:AT3G12260.1	0.999941
AT3G13060.2	TAS3C-5'D6[+]	2182	5.5	0.730252	0.885868	no	ECT5	TAS3C-5'D6[+]:ECT5	0.999941
AT3G13080.4	TAS3B-5'D4[+]	4460	5.5	0.192172	0.801128	no	ABCC3	TAS3B-5'D4[+]:ABCC3	0.999941
AT3G16180.1	TAS4-3'D9[+]	1888	5	0.564985	0.581539	no	NA	TAS4-3'D9[+]:AT3G16180.1	0.999941
AT3G16840.1	TAS3A-5'D6[+]	1079	5.5	0.407404	0.991874	no	NA	TAS3A-5'D6[+]:AT3G16840.1	0.999941
AT3G17998.1	TAS3A-5'D1[+]	1550	6	0.322848	0.482601	no	CPuORF30	TAS3A-5'D1[+]:CPuORF30	0.999941
AT3G18000.1	TAS3A-5'D1[+]	1550	6	0.322848	0.482601	no	NMT1	TAS3A-5'D1[+]:NMT1	0.999941
AT3G18390.1	TAS3C-5'D9[+]	2852	6	0.219076	0.66331	no	EMB1865	TAS3C-5'D9[+]:EMB1865	0.999941
AT3G20240.1	TAS3C-5'D3[+]	174	6	0.184485	0.843914	no	NA	TAS3C-5'D3[+]:AT3G20240.1	0.999941
AT3G21200.1	TAS3C-5'D4[+]	1019	5.5	1.09154	1.06665	no	GluTRBP	TAS3C-5'D4[+]:GluTRBP	0.999941
AT3G21865.1	TAS3C-5'D10[+]	489	6	0.388187	1.03437	no	PEX22	TAS3C-5'D10[+]:PEX22	0.999941
AT3G22968.1	TAS3C-5'D2[-]	1782	5	0.295944	0.575218	no	CPuORF59	TAS3C-5'D2[-]:CPuORF59	0.999941
AT3G22970.2	TAS3C-5'D2[-]	1780	5	0.295944	0.575218	no	NA	TAS3C-5'D2[-]:AT3G22970.2	0.999941
AT3G23400.1	TAS3A-5'D8[+]	729	5.5	0.511177	0.399097	no	FIB4	TAS3A-5'D8[+]:FIB4	0.999941
AT3G24080.2	TAS3C-5'D3[+]	1027	6	0.691818	0.686517	no	NA	TAS3C-5'D3[+]:AT3G24080.2	0.999941
AT3G24140.1	TAS3C-5'D3[+]	681	6	0.914737	1.03749	no	FMA	TAS3C-5'D3[+]:FMA	0.999941
AT3G24420.1	TAS3C-5'D2[-]	1011	5	0.172955	0.530586	no	NA	TAS3C-5'D2[-]:AT3G24420.1	0.999941
AT3G24490.1	TAS3A-5'D4[-]	117	2.5	0.0230606	0.359134	no	NA	TAS3A-5'D4[-]:AT3G24490.1	0.999941
AT3G25290.2	TAS4-3'D7[+]	1246	4	0.238293	0.444893	no	NA	TAS4-3'D7[+]:AT3G25290.2	0.999941
AT3G26030.1	TAS3A-5'D2[+]	1451	4.5	0.169111	0.762015	no	ATB' DELTA	TAS3A-5'D2[+]:ATB' DELTA	0.999941
AT3G26110.1	TAS1B-3'D10[-]	528	5.5	0.726409	1.22666	no	NA	TAS1B-3'D10[-]:AT3G26110.1	0.999941
AT3G28830.1	TAS3C-5'D2[+]	487	5.5	0.62648	0.401432	no	NA	TAS3C-5'D2[+]:AT3G28830.1	0.999941
AT3G29040.1	TAS3A-5'D1[+]	578	6	0.465055	1.13049	no	NA	TAS3A-5'D1[+]:AT3G29040.1	0.999941
AT3G46430.1	TAS3C-5'D3[+]	86	6	0.434308	0.473474	no	NA	TAS3C-5'D3[+]:AT3G46430.1	0.999941
AT3G47470.1	TAS4-3'D4[-]	291	5.5	0.461212	0.343379	no	CAB4	TAS4-3'D4[-]:CAB4	0.999941
AT3G49430.3	TAS1C-3'D7[-]	247	5.5	0.272884	1.12961	no	At-SR34a	TAS1C-3'D7[-]:At-SR34a	0.999941
AT3G50670.2	TAS4-3'D9[+]	1708	6	0.468899	0.852739	no	U1-70K	TAS4-3'D9[+]:U1-70K	0.999941
AT3G51550.1	TAS2-3'D3[-]	2979	6	0.26904	0.408551	no	FER	TAS2-3'D3[-]:FER	0.999941
AT3G52100.1	TAS3A-5'D7[+]	1072	6	0.222919	0.87369	no	NA	TAS3A-5'D7[+]:AT3G52100.1	0.999941
AT3G52300.2	TAS3B-5'D5[+]	377	6	0.295944	0.228416	no	ATPQ	TAS3B-5'D5[+]:ATPQ	0.999941
AT3G54050.2	TAS3B-5'D7[+]	1280	5.5	0.326692	0.18933	no	HCEF1	TAS3B-5'D7[+]:HCEF1	0.999941
AT3G54390.1	TAS3C-5'D3[+]	909	6	0.149894	0.917224	no	NA	TAS3C-5'D3[+]:AT3G54390.1	0.999941
AT3G55520.1	TAS3B-5'D9[+]	766	6	0.165268	0.72674	no	NA	TAS3B-5'D9[+]:AT3G55520.1	0.999941
AT3G56150.2	TAS3C-5'D10[+]	271	6	0.338222	0.596018	no	ATEIF3C-1	TAS3C-5'D10[+]:ATEIF3C-1	0.999941
AT3G56850.1	TAS3C-5'D3[+]	1308	6	0.311318	0.85685	no	AREB3	TAS3C-5'D3[+]:AREB3	0.999941
AT3G62840.2	TAS3A-5'D1[+]	162	6	0.303631	0.352881	no	NA	TAS3A-5'D1[+]:AT3G62840.2	0.999941
AT4G01000.1	TAS1B-3'D4[-]	509	5.5	0.584202	1.02232	no	NA	TAS1B-3'D4[-]:AT4G01000.1	0.999941
AT4G02530.1	TAS3B-5'D9[+]	298	6	1.74876	0.883831	no	NA	TAS3B-5'D9[+]:AT4G02530.1	0.999941
AT4G04614.1	TAS3C-5'D3[+]	403	6	0.365126	0.696188	no	NA	TAS3C-5'D3[+]:AT4G04614.1	0.999941
AT4G11260.1	TAS3B-5'D9[-]	1239	6	0.196015	0.489142	no	ATSGT1B	TAS3B-5'D9[-]:ATSGT1B	0.999941
AT4G13670.1	TAS1B-3'D4[-]	511	6	0.161424	0.0747945	no	PTAC5	TAS1B-3'D4[-]:PTAC5	0.999941
AT4G14690.1	TAS4-3'D4[-]	265	5.5	0.395874	0.322778	no	ELIP2	TAS4-3'D4[-]:ELIP2	0.999941
AT4G16155.1	TAS3B-5'D9[+]	1564	6	0.25751	0.530985	no	NA	TAS3B-5'D9[+]:AT4G16155.1	0.999941
AT4G20300.2	TAS3B-5'D9[-]	1630	3.5	0.230606	0.739141	no	NA	TAS3B-5'D9[-]:AT4G20300.2	0.999941
AT4G22220.1	TAS3C-5'D3[+]	643	5.5	0.319005	0.40461	no	ATISU1	TAS3C-5'D3[+]:ATISU1	0.999941
AT4G24050.1	TAS3C-5'D3[+]	1307	6	0.684131	0.708824	no	NA	TAS3C-5'D3[+]:AT4G24050.1	0.999941
AT4G24680.1	TAS3C-5'D10[+]	2137	5	0.472742	1.25558	no	MOS1	TAS3C-5'D10[+]:MOS1	0.999941
AT4G25370.1	TAS3B-5'D10[+]	775	5	0.388187	0.377735	no	NA	TAS3B-5'D10[+]:AT4G25370.1	0.999941
AT4G26670.1	TAS3A-5'D7[-]	852	5	0.776374	0.918519	no	NA	TAS3A-5'D7[-]:AT4G26670.1	0.999941
AT4G27760.1	TAS1C-3'D7[-]	722	4	0.330535	0.67066	no	FEY	TAS1C-3'D7[-]:FEY	0.999941
AT4G27830.1	TAS3C-5'D2[+]	746	5.5	0.372813	0.680112	no	BGLU10	TAS3C-5'D2[+]:BGLU10	0.999941
AT4G28310.1	TAS3C-5'D9[+]	560	6	0.388187	0.889213	no	NA	TAS3C-5'D9[+]:AT4G28310.1	0.999941
AT4G28740.1	TAS2-3'D9[-]	1176	5.5	0.130677	0.558028	no	NA	TAS2-3'D9[-]:AT4G28740.1	0.999941
AT4G28750.1	TAS3A-5'D7[+]	329	6	0.215232	0.104586	no	PSAE-1	TAS3A-5'D7[+]:PSAE-1	0.999941
AT4G29210.2	TAS3A-5'D9[+]	1707	6	0.418934	0.812851	no	GGT3	TAS3A-5'D9[+]:GGT3	0.999941
AT4G29830.1	TAS3B-5'D6[+]	430	6	0.142207	0.773546	no	SKI8	TAS3B-5'D6[+]:SKI8	0.999941
AT4G31300.3	TAS3B-5'D1[+]	411	5	0.261354	0.569581	no	PBA1	TAS3B-5'D1[+]:PBA1	0.999941
AT4G31340.2	TAS1C-3'D7[+]	1503	6	0.126833	0.460125	no	NA	TAS1C-3'D7[+]:AT4G31340.2	0.999941
AT4G31340.2	TAS3C-5'D4[-]	1692	2	0.215232	0.196122	no	NA	TAS3C-5'D4[-]:AT4G31340.2	0.999941
AT4G31540.1	TAS2-3'D3[+]	2401	6	0.384343	0.853145	no	ATEXO70G1	TAS2-3'D3[+]:ATEXO70G1	0.999941
AT4G32410.1	TAS1B-3'D4[-]	3035	6	0.0999293	0.656109	no	AtCESA1	TAS1B-3'D4[-]:AtCESA1	0.999941
AT4G33150.3	TAS3C-5'D3[+]	1710	6	0.334379	0.12853	no	LKR	TAS3C-5'D3[+]:LKR	0.999941
AT4G34480.1	TAS3C-5'D1[+]	1447	6	0.295944	0.71561	no	NA	TAS3C-5'D1[+]:AT4G34480.1	0.999941
AT4G35050.1	TAS3A-5'D8[+]	1187	5.5	0.119146	0.648251	no	MSI3	TAS3A-5'D8[+]:MSI3	0.999941
AT4G35110.4	TAS1B-3'D4[-]	1131	5.5	0.995449	1.13561	no	NA	TAS1B-3'D4[-]:AT4G35110.4	0.999941
AT4G36195.3	TAS1C-3'D10[+]	485	6	0.64954	0.839588	no	NA	TAS1C-3'D10[+]:AT4G36195.3	0.999941
AT4G36810.1	TAS3C-5'D1[-]	1012	5	0.384343	0.539856	no	AtGGPPS11	TAS3C-5'D1[-]:AtGGPPS11	0.999941
AT4G38520.2	TAS3C-5'D4[-]	2116	5.5	0.441995	0.741201	no	NA	TAS3C-5'D4[-]:AT4G38520.2	0.999941
AT4G39040.2	TAS3C-5'D3[+]	432	5.5	0.365126	0.849348	no	NA	TAS3C-5'D3[+]:AT4G39040.2	0.999941
AT4G39820.1	TAS3B-5'D3[+]	1312	6	0.24598	0.857213	no	NA	TAS3B-5'D3[+]:AT4G39820.1	0.999941
AT4G40030.3	TAS3C-5'D9[-]	826	5	0.822495	0.295592	no	NA	TAS3C-5'D9[-]:AT4G40030.3	0.999941
AT5G01410.1	TAS1C-3'D7[-]	1134	4.5	1.4605	0.404875	no	ATPDX1	TAS1C-3'D7[-]:ATPDX1	0.999941
AT5G01410.1	TAS4-3'D6[+]	694	6	0.549611	0.234248	no	ATPDX1	TAS4-3'D6[+]:ATPDX1	0.999941
AT5G02800.1	TAS3C-5'D9[+]	1335	5.5	0.288258	0.888649	no	CDL1	TAS3C-5'D9[+]:CDL1	0.999941
AT5G03040.3	TAS2-3'D4[-]	1222	5	0.25751	0.767706	no	iqd2	TAS2-3'D4[-]:iqd2	0.999941
AT5G04600.1	TAS3B-5'D9[+]	623	5.5	1.50663	0.901824	no	NA	TAS3B-5'D9[+]:AT5G04600.1	0.999941
AT5G04870.1	TAS4-3'D8[-]	2263	6	0.199859	0.785994	no	ATCPK1	TAS4-3'D8[-]:ATCPK1	0.999941
AT5G07030.1	TAS1A-3'D2[+]	965	4	0.338222	0.45863	no	NA	TAS1A-3'D2[+]:AT5G07030.1	0.999941
AT5G07530.2	TAS3C-5'D3[+]	165	5.5	0.457369	0.662696	no	ATGRP-7	TAS3C-5'D3[+]:ATGRP-7	0.999941
AT5G07530.2	TAS3B-5'D6[+]	635	5.5	5.51533	0.00803698	no	ATGRP-7	TAS3B-5'D6[+]:ATGRP-7	0.999941
AT5G08200.1	TAS3C-5'D2[+]	1681	5	0.411247	0.926801	no	NA	TAS3C-5'D2[+]:AT5G08200.1	0.999941
AT5G09810.1	TAS1C-3'D5[+]	1319	5.5	1.2299	0.207714	no	ACT7	TAS1C-3'D5[+]:ACT7	0.999941
AT5G10860.1	TAS3C-5'D7[-]	800	5.5	1.2568	0.874847	no	CBSX3	TAS3C-5'D7[-]:CBSX3	0.999941
AT5G12840.4	TAS3B-5'D9[+]	960	5	0.192172	0.631503	no	ATHAP2A	TAS3B-5'D9[+]:ATHAP2A	0.999941
AT5G13100.1	TAS1B-3'D4[-]	1010	4.5	0.13452	0.578583	no	NA	TAS1B-3'D4[-]:AT5G13100.1	0.999941
AT5G13340.1	TAS1A-3'D3[-]	552	6	0.238293	0.907091	no	NA	TAS1A-3'D3[-]:AT5G13340.1	0.999941
AT5G13420.1	TAS3B-5'D7[+]	1329	5.5	0.172955	0.391169	no	TRA2	TAS3B-5'D7[+]:TRA2	0.999941
AT5G14030.4	TAS1A-3'D2[-]	645	5	0.384343	0.279823	no	NA	TAS1A-3'D2[-]:AT5G14030.4	0.999941
AT5G16010.1	TAS3B-5'D5[+]	542	6	0.319005	0.710255	no	NA	TAS3B-5'D5[+]:AT5G16010.1	0.999941
AT5G19990.1	TAS3B-5'D6[+]	963	4.5	0.52655	0.778511	no	ATSUG1	TAS3B-5'D6[+]:ATSUG1	0.999941
AT5G20190.1	TAS1A-3'D6[+]	644	5.5	1.24143	0.703324	no	NA	TAS1A-3'D6[+]:AT5G20190.1	0.999941
AT5G20270.1	TAS3C-5'D9[-]	1359	6	0.149894	0.619193	no	HHP1	TAS3C-5'D9[-]:HHP1	0.999941
AT5G22580.1	TAS3C-5'D3[+]	170	6	1.11075	0.28335	no	NA	TAS3C-5'D3[+]:AT5G22580.1	0.999941
AT5G23200.1	TAS3C-5'D3[+]	1319	5	0.349752	0.260486	no	NA	TAS3C-5'D3[+]:AT5G23200.1	0.999941
AT5G23280.1	TAS2-3'D7[-]	895	6	0.438151	0.748093	no	NA	TAS2-3'D7[-]:AT5G23280.1	0.999941
AT5G26742.3	TAS3A-5'D7[+]	1804	6	0.342066	0.0658566	no	AtRH3	TAS3A-5'D7[+]:AtRH3	0.999941
AT5G28540.1	TAS1B-3'D4[-]	1747	5	0.734096	0.627355	no	BIP1	TAS1B-3'D4[-]:BIP1	0.999941
AT5G33370.2	TAS3C-5'D4[-]	1300	3.5	15.3968	0.596905	no	NA	TAS3C-5'D4[-]:AT5G33370.2	0.999941
AT5G35630.3	TAS2-3'D4[+]	1421	6	0.695662	0.260719	no	ATGSL1	TAS2-3'D4[+]:ATGSL1	0.999941
AT5G35700.1	TAS1A-3'D5[-]	1457	5	0.311318	1.31132	no	FIM2	TAS1A-3'D5[-]:FIM2	0.999941
AT5G43670.1	TAS2-3'D7[+]	1633	5.5	0.476586	1.47659	no	NA	TAS2-3'D7[+]:AT5G43670.1	0.999941
AT5G46840.2	TAS3C-5'D4[-]	1566	6	0.180641	0.795434	no	NA	TAS3C-5'D4[-]:AT5G46840.2	0.999941
AT5G47970.2	TAS3C-5'D8[-]	1557	6	0.461212	1.13425	no	NA	TAS3C-5'D8[-]:AT5G47970.2	0.999941
AT5G48970.1	TAS3A-5'D2[-]	1260	5.5	0.288258	0.807315	no	NA	TAS3A-5'D2[-]:AT5G48970.1	0.999941
AT5G50320.1	TAS1B-3'D7[-]	1097	5	0.203702	0.719659	no	AtELP3	TAS1B-3'D7[-]:AtELP3	0.999941
AT5G50460.1	TAS1A-3'D8[-]	189	4	2.43289	0.119518	no	NA	TAS1A-3'D8[-]:AT5G50460.1	0.999941
AT5G50790.1	TAS3C-5'D3[+]	984	6	0.234449	0.522094	no	AtSWEET10	TAS3C-5'D3[+]:AtSWEET10	0.999941
AT5G52070.1	TAS1B-3'D5[+]	755	4.5	0.403561	1.00828	no	NA	TAS1B-3'D5[+]:AT5G52070.1	0.999941
AT5G52650.1	TAS3B-5'D7[+]	528	6	1.30292	0.0894814	no	NA	TAS3B-5'D7[+]:AT5G52650.1	0.999941
AT5G53160.2	TAS3B-5'D5[+]	321	4.5	0.226763	0.602024	no	PYL8	TAS3B-5'D5[+]:PYL8	0.999941
AT5G53570.2	TAS1C-3'D7[+]	2146	6	1.03773	0.941406	no	NA	TAS1C-3'D7[+]:AT5G53570.2	0.999941
AT5G53880.1	TAS3B-5'D9[+]	241	6	0.403561	0.261184	no	NA	TAS3B-5'D9[+]:AT5G53880.1	0.999941
AT5G56190.2	TAS3C-5'D2[+]	1347	5.5	0.591889	0.766747	no	NA	TAS3C-5'D2[+]:AT5G56190.2	0.999941
AT5G56950.1	TAS3C-5'D3[+]	1132	6	0.39203	0.476442	no	NAP1;3	TAS3C-5'D3[+]:NAP1;3	0.999941
AT5G56970.1	TAS3C-5'D9[+]	1517	5.5	0.834025	0.942708	no	ATCKX3	TAS3C-5'D9[+]:ATCKX3	0.999941
AT5G57735.1	TAS3B-5'D8[-]	334	5	0.326692	0.737283	no	TAS3c	TAS3B-5'D8[-]:TAS3c	0.999941
AT5G60670.1	TAS3C-5'D3[+]	305	6	1.4951	0.775439	no	NA	TAS3C-5'D3[+]:AT5G60670.1	0.999941
AT5G61530.3	TAS4-3'D5[+]	1370	5	0.564985	0.699407	no	NA	TAS4-3'D5[+]:AT5G61530.3	0.999941
AT5G61570.2	TAS3B-5'D6[+]	1010	4.5	0.149894	0.847105	no	NA	TAS3B-5'D6[+]:AT5G61570.2	0.999941
AT5G61820.1	TAS1C-3'D5[-]	1236	6	0.161424	0.671246	no	NA	TAS1C-3'D5[-]:AT5G61820.1	0.999941
AT5G62020.1	TAS1C-3'D8[-]	928	5	0.230606	0.898928	no	AT-HSFB2A	TAS1C-3'D8[-]:AT-HSFB2A	0.999941
AT5G63020.1	TAS3B-5'D5[+]	268	5.5	0.549611	1.54961	no	NA	TAS3B-5'D5[+]:AT5G63020.1	0.999941
AT5G63420.1	TAS3C-5'D3[+]	2606	6	0.39203	1.39203	no	emb2746	TAS3C-5'D3[+]:emb2746	0.999941
AT5G63810.1	TAS1A-3'D7[-]	2150	6	0.311318	0.727186	no	AtBGAL10	TAS1A-3'D7[-]:AtBGAL10	0.999941
AT5G64170.2	TAS3B-5'D9[+]	1869	5	0.468899	0.976993	no	NA	TAS3B-5'D9[+]:AT5G64170.2	0.999941
AT5G65220.1	TAS3B-5'D9[+]	450	6	0.561141	0.202567	no	NA	TAS3B-5'D9[+]:AT5G65220.1	0.999941
AT5G66540.1	TAS3A-5'D1[+]	594	5.5	0.14605	0.500155	no	NA	TAS3A-5'D1[+]:AT5G66540.1	0.999941
AT5G67070.1	TAS3A-5'D4[-]	137	5	1.0531	0.772853	no	RALFL34	TAS3A-5'D4[-]:RALFL34	0.999941
ATCG00380.1	TAS3B-5'D8[+]	235	6	0.860929	0.117859	no	RPS4	TAS3B-5'D8[+]:RPS4	0.999941
ATCG00830.1	TAS3B-5'D9[+]	771	4.5	2.24072	0.189599	no	RPL2.1	TAS3B-5'D9[+]:RPL2.1	0.999941
ATCG01040.1	TAS1B-3'D9[+]	199	3.5	0.261354	0.0563583	no	YCF5	TAS1B-3'D9[+]:YCF5	0.999941
ATMG00910.1	TAS4-3'D9[+]	34	6	0.00768687	0.922585	no	ORF215A	TAS4-3'D9[+]:ORF215A	0.999941
ATMG00980.1	TAS4-3'D9[+]	34	6	0.0192172	0.933142	no	RPSL2	TAS4-3'D9[+]:RPSL2	0.999941

## Sheet: Col-0 (-Xrn1) (biorep #2)
Target transcript	tasiRNA	tasiRNA slice site position in target transcript	Allen score of sRNA:target duplex	Slice site RPM	Slice site RPM + 1/Maximum adjacent site RPM + 1	Previously verified by 5' RACE?	Target gene common name	Interaction name	P-value adjusted for multiple testing
AT5G60450.1	TAS3A-5'D8[+]	1884	1	0.450222	1.45022	yes	ARF4	TAS3A-5'D8[+]:ARF4	0
AT5G18040.1	TAS1A-3'D2[+]	685	2	1.63372	2.16554	yes	NA	TAS1A-3'D2[+]:AT5G18040.1	0.00320166
AT2G33860.1	TAS3A-5'D7[+]	1684	1.5	0.401188	0.92225	yes	ARF3	TAS3A-5'D7[+]:ARF3	0.173167
AT5G62000.4	TAS3A-5'D7[+]	1745	1.5	0.287518	0.837603	yes	ARF1-BP	TAS3A-5'D7[+]:ARF1-BP	0.183455
AT3G17185.2	TAS3B-5'D8[-]	705	1	0.127043	1.12704	no	TAS3a	TAS3B-5'D8[-]:TAS3a	0.193413
AT5G49580.1	TAS3A-5'D6[+]	185	2	0.180534	0.960121	no	NA	TAS3A-5'D6[+]:AT5G49580.1	0.261728
AT1G71710.2	TAS1B-3'D4[-]	1847	5	1.11441	1.60338	no	NA	TAS1B-3'D4[-]:AT1G71710.2	0.522837
AT2G25930.1	TAS3C-5'D10[+]	2440	5	4.86774	3.16172	no	ELF3	TAS3C-5'D10[+]:ELF3	0.522837
AT5G57040.1	TAS2-3'D2[-]	760	2	0.47251	0.932268	no	NA	TAS2-3'D2[-]:AT5G57040.1	0.522837
AT1G53450.2	TAS4-3'D1[+]	1651	6	0.54829	1.54829	no	NA	TAS4-3'D1[+]:AT1G53450.2	0.757738
AT2G43340.1	TAS4-3'D6[+]	643	3.5	0.454679	1.18955	no	NA	TAS4-3'D6[+]:AT2G43340.1	0.844831
AT4G33000.3	TAS3C-5'D8[-]	527	6	1.06315	1.85257	no	ATCBL10	TAS3C-5'D8[-]:ATCBL10	0.869043
AT3G15160.1	TAS3C-5'D8[-]	1807	5.5	0.682019	1.68202	no	NA	TAS3C-5'D8[-]:AT3G15160.1	0.869921
AT1G15940.1	TAS1A-3'D6[+]	547	5	0.269687	1.26969	no	NA	TAS1A-3'D6[+]:AT1G15940.1	0.880925
AT1G27750.1	TAS3B-5'D3[+]	3223	5	0.624069	1.24843	no	NA	TAS3B-5'D3[+]:AT1G27750.1	0.880925
AT1G48380.2	TAS3B-5'D6[+]	1054	4	0.410103	0.964921	no	HYP7	TAS3B-5'D6[+]:HYP7	0.880925
AT1G59620.1	TAS3B-5'D1[+]	2424	5	0.211738	1.21174	no	CW9	TAS3B-5'D1[+]:CW9	0.880925
AT1G64330.1	TAS3C-5'D2[-]	1889	4.5	0.583951	1.22178	no	NA	TAS3C-5'D2[-]:AT1G64330.1	0.880925
AT1G67530.2	TAS3C-5'D9[+]	2537	6	0.376671	1.37667	no	NA	TAS3C-5'D9[+]:AT1G67530.2	0.880925
AT2G03410.1	TAS1A-3'D9[-]	1290	3.5	0.191678	0.927167	no	NA	TAS1A-3'D9[-]:AT2G03410.1	0.880925
AT2G05920.1	TAS3C-5'D3[+]	2460	3	0.178306	0.563211	no	NA	TAS3C-5'D3[+]:AT2G05920.1	0.880925
AT3G03940.1	TAS3A-5'D3[+]	1130	4	0.367755	0.995135	no	NA	TAS3A-5'D3[+]:AT3G03940.1	0.880925
AT3G11450.1	TAS3C-5'D2[+]	1187	5.5	1.22585	1.43762	no	NA	TAS3C-5'D2[+]:AT3G11450.1	0.880925
AT3G54760.2	TAS3A-5'D2[+]	2594	5	1.33061	1.34117	no	NA	TAS3A-5'D2[+]:AT3G54760.2	0.880925
AT3G58820.1	TAS3A-5'D4[-]	94	4	0.16939	1.16939	no	NA	TAS3A-5'D4[-]:AT3G58820.1	0.880925
AT3G60030.1	TAS1B-3'D4[-]	371	6	0.88707	1.45559	no	SPL12	TAS1B-3'D4[-]:SPL12	0.880925
AT4G12780.2	TAS3C-5'D1[+]	795	5.5	0.630756	1.38924	no	NA	TAS3C-5'D1[+]:AT4G12780.2	0.880925
AT4G28710.1	TAS1C-3'D7[-]	1197	4.5	0.278602	1.2786	no	ATXIH	TAS1C-3'D7[-]:ATXIH	0.880925
AT4G35550.1	TAS3A-5'D9[+]	989	4.5	0.726595	1.13643	no	ATWOX13	TAS3A-5'D9[+]:ATWOX13	0.880925
AT5G08590.1	TAS1C-3'D6[-]	899	3.5	0.158246	0.713175	no	ASK2	TAS1C-3'D6[-]:ASK2	0.880925
AT5G22260.1	TAS3A-5'D4[-]	70	5	1.00297	1.24354	no	MS1	TAS3A-5'D4[-]:MS1	0.880925
AT5G47420.1	TAS1A-3'D8[-]	828	6	0.900443	1.41717	no	NA	TAS1A-3'D8[-]:AT5G47420.1	0.880925
AT5G61570.2	TAS3B-5'D6[+]	1010	4.5	0.294204	1.10885	no	NA	TAS3B-5'D6[+]:AT5G61570.2	0.880925
AT2G19760.1	TAS2-3'D3[-]	645	4	0.809061	1.04506	no	PFN1	TAS2-3'D3[-]:PFN1	0.905486
AT1G01630.1	TAS3C-5'D9[+]	856	5.5	0.329865	0.680609	no	NA	TAS3C-5'D9[+]:AT1G01630.1	0.999925
AT1G01780.1	TAS1C-3'D8[-]	799	4.5	0.122585	0.7555	no	PLIM2b	TAS1C-3'D8[-]:PLIM2b	0.999925
AT1G02000.1	TAS4-3'D10[-]	1389	6	0.269687	0.754859	no	GAE2	TAS4-3'D10[-]:GAE2	0.999925
AT1G02180.1	TAS3C-5'D10[-]	465	6	0.249628	1.24963	no	NA	TAS3C-5'D10[-]:AT1G02180.1	0.999925
AT1G03440.1	TAS3C-5'D3[+]	308	5.5	0.200594	0.224382	no	NA	TAS3C-5'D3[+]:AT1G03440.1	0.999925
AT1G03730.1	TAS3B-5'D3[+]	868	5.5	0.115899	0.511582	no	NA	TAS3B-5'D3[+]:AT1G03730.1	0.999925
AT1G04270.2	TAS1A-3'D5[+]	82	5	0.294204	0.254047	no	RPS15	TAS1A-3'D5[+]:RPS15	0.999925
AT1G05120.1	TAS3B-5'D6[+]	74	5.5	0.00222882	0.865299	no	NA	TAS3B-5'D6[+]:AT1G05120.1	0.999925
AT1G07320.4	TAS1B-3'D4[-]	853	6	1.27488	0.159263	no	EMB2784	TAS1B-3'D4[-]:EMB2784	0.999925
AT1G07450.1	TAS1A-3'D7[-]	499	5.5	0.225111	0.726433	no	NA	TAS1A-3'D7[-]:AT1G07450.1	0.999925
AT1G07750.1	TAS4-3'D9[+]	870	6	0.167161	0.752756	no	NA	TAS4-3'D9[+]:AT1G07750.1	0.999925
AT1G08110.4	TAS3B-5'D5[+]	663	5	0.216195	0.859769	no	NA	TAS3B-5'D5[+]:AT1G08110.4	0.999925
AT1G08770.1	TAS2-3'D7[-]	808	6	0.240713	0.955378	no	PRA1.E	TAS2-3'D7[-]:PRA1.E	0.999925
AT1G08820.2	TAS3A-5'D1[+]	111	5.5	0.258543	1.08243	no	VAP27-2	TAS3A-5'D1[+]:VAP27-2	0.999925
AT1G10060.3	TAS4-3'D6[+]	1557	5	0.269687	0.351069	no	ATBCAT-1	TAS4-3'D6[+]:ATBCAT-1	0.999925
AT1G10200.1	TAS3C-5'D10[+]	579	6	0.142644	0.414221	no	WLIM1	TAS3C-5'D10[+]:WLIM1	0.999925
AT1G10510.1	TAS1C-3'D9[+]	1923	4	0.26523	0.901536	no	emb2004	TAS1C-3'D9[+]:emb2004	0.999925
AT1G10670.4	TAS4-3'D4[+]	690	5.5	0.118127	0.55948	no	ACLA-1	TAS4-3'D4[+]:ACLA-1	0.999925
AT1G11360.4	TAS1B-3'D4[-]	786	6	0.24517	0.820764	no	NA	TAS1B-3'D4[-]:AT1G11360.4	0.999925
AT1G11750.2	TAS3A-5'D4[-]	167	6	0.394501	0.819293	no	CLPP6	TAS3A-5'D4[-]:CLPP6	0.999925
AT1G11860.3	TAS3B-5'D1[+]	1447	6	0.797917	0.545905	no	NA	TAS3B-5'D1[+]:AT1G11860.3	0.999925
AT1G11910.1	TAS4-3'D7[-]	1668	5	0.318721	0.245132	no	APA1	TAS4-3'D7[-]:APA1	0.999925
AT1G12080.2	TAS3C-5'D8[-]	300	6	1.10327	0.405589	no	NA	TAS3C-5'D8[-]:AT1G12080.2	0.999925
AT1G12090.1	TAS4-3'D7[+]	784	5.5	0.338781	0.160836	no	ELP	TAS4-3'D7[+]:ELP	0.999925
AT1G12270.1	TAS3B-5'D9[+]	1573	6	0.347696	1.0804	no	Hop1	TAS3B-5'D9[+]:Hop1	0.999925
AT1G12310.1	TAS1B-3'D2[+]	499	5.5	1.70505	0.491033	no	NA	TAS1B-3'D2[+]:AT1G12310.1	0.999925
AT1G12800.1	TAS1C-3'D7[-]	1774	6	0.162704	0.62575	no	NA	TAS1C-3'D7[-]:AT1G12800.1	0.999925
AT1G13020.1	TAS3B-5'D7[+]	1893	5	0.369984	1.05673	no	EIF4B2	TAS3B-5'D7[+]:EIF4B2	0.999925
AT1G13690.1	TAS3C-5'D3[+]	550	5.5	0.298662	0.554041	no	ATE1	TAS3C-5'D3[+]:ATE1	0.999925
AT1G15270.1	TAS3B-5'D9[+]	207	6	3.60177	0.856116	no	NA	TAS3B-5'D9[+]:AT1G15270.1	0.999925
AT1G15690.2	TAS4-3'D4[-]	1074	4	0.385586	0.740374	no	AtAVP1	TAS4-3'D4[-]:AtAVP1	0.999925
AT1G17190.1	TAS3A-5'D6[+]	674	6	0.242941	0.840281	no	ATGSTU26	TAS3A-5'D6[+]:ATGSTU26	0.999925
AT1G18540.1	TAS4-3'D8[+]	728	4.5	0.278602	0.202805	no	NA	TAS4-3'D8[+]:AT1G18540.1	0.999925
AT1G20440.1	TAS3C-5'D3[+]	485	5.5	0.222882	0.209282	no	AtCOR47	TAS3C-5'D3[+]:AtCOR47	0.999925
AT1G21400.1	TAS3A-5'D4[+]	993	5.5	0.180534	0.910602	no	NA	TAS3A-5'D4[+]:AT1G21400.1	0.999925
AT1G22380.1	TAS4-3'D7[+]	903	5.5	0.242941	1.04302	no	AtUGT85A3	TAS4-3'D7[+]:AtUGT85A3	0.999925
AT1G22610.1	TAS1A-3'D1[-]	1457	6	0.211738	0.825405	no	NA	TAS1A-3'D1[-]:AT1G22610.1	0.999925
AT1G23149.1	TAS3C-5'D3[+]	721	5.5	0.242941	0.730249	no	CPuORF29	TAS3C-5'D3[+]:CPuORF29	0.999925
AT1G23150.1	TAS3C-5'D3[+]	721	5.5	0.242941	0.730249	no	NA	TAS3C-5'D3[+]:AT1G23150.1	0.999925
AT1G23190.1	TAS3B-5'D6[+]	1786	6	1.10995	0.980323	no	PGM3	TAS3B-5'D6[+]:PGM3	0.999925
AT1G23640.1	TAS1A-3'D3[-]	1239	4	0.278602	0.919829	no	NA	TAS1A-3'D3[-]:AT1G23640.1	0.999925
AT1G26580.1	TAS3A-5'D6[+]	1704	5.5	0.124814	1.12481	no	NA	TAS3A-5'D6[+]:AT1G26580.1	0.999925
AT1G26640.1	TAS3A-5'D6[+]	120	6	0.18945	0.917479	no	NA	TAS3A-5'D6[+]:AT1G26640.1	0.999925
AT1G26710.1	TAS3B-5'D6[+]	589	5.5	0.822434	1.2723	no	NA	TAS3B-5'D6[+]:AT1G26710.1	0.999925
AT1G26761.1	TAS1B-3'D4[-]	1292	4	0.28306	0.787865	no	NA	TAS1B-3'D4[-]:AT1G26761.1	0.999925
AT1G27435.1	TAS3B-5'D6[+]	105	6	1.17459	1.1323	no	NA	TAS3B-5'D6[+]:AT1G27435.1	0.999925
AT1G28320.1	TAS3A-5'D4[+]	1223	6	0.294204	0.952433	no	DEG15	TAS3A-5'D4[+]:DEG15	0.999925
AT1G29470.2	TAS3C-5'D2[+]	2313	5	0.309806	0.35008	no	NA	TAS3C-5'D2[+]:AT1G29470.2	0.999925
AT1G29700.1	TAS1A-3'D7[-]	1231	6	0.200594	0.674458	no	NA	TAS1A-3'D7[-]:AT1G29700.1	0.999925
AT1G30620.3	TAS3A-5'D4[+]	1706	5.5	0.546061	1.05635	no	HSR8	TAS3A-5'D4[+]:HSR8	0.999925
AT1G31330.1	TAS3C-5'D1[+]	358	5	0.267458	0.113198	no	PSAF	TAS3C-5'D1[+]:PSAF	0.999925
AT1G33240.1	TAS1B-3'D10[+]	587	6	0.127043	0.525279	no	AT-GTL1	TAS1B-3'D10[+]:AT-GTL1	0.999925
AT1G34030.1	TAS3C-5'D2[+]	355	6	1.1679	0.469963	no	NA	TAS3C-5'D2[+]:AT1G34030.1	0.999925
AT1G34350.2	TAS3C-5'D8[+]	786	5.5	0.111441	0.689084	no	NA	TAS3C-5'D8[+]:AT1G34350.2	0.999925
AT1G43170.9	TAS2-3'D8[-]	1172	5	0.470281	0.334235	no	ARP1	TAS2-3'D8[-]:ARP1	0.999925
AT1G44170.3	TAS4-3'D9[+]	870	6	0.456908	0.775712	no	ALDH3H1	TAS4-3'D9[+]:ALDH3H1	0.999925
AT1G44760.1	TAS1A-3'D8[-]	386	6	0.147102	0.57655	no	NA	TAS1A-3'D8[-]:AT1G44760.1	0.999925
AT1G45160.2	TAS1A-3'D9[+]	3514	5.5	0.557205	1.11135	no	NA	TAS1A-3'D9[+]:AT1G45160.2	0.999925
AT1G47200.1	TAS3B-5'D7[+]	622	5	0.407874	0.583437	no	WPP2	TAS3B-5'D7[+]:WPP2	0.999925
AT1G50430.2	TAS3C-5'D2[-]	542	6	0.646358	0.941377	no	7RED	TAS3C-5'D2[-]:7RED	0.999925
AT1G50690.1	TAS3B-5'D8[-]	507	6	0.127043	1.12704	no	NA	TAS3B-5'D8[-]:AT1G50690.1	0.999925
AT1G52670.1	TAS2-3'D3[-]	1010	4.5	0.271916	0.659223	no	NA	TAS2-3'D3[-]:AT1G52670.1	0.999925
AT1G53910.3	TAS3C-5'D2[-]	1460	4.5	0.419018	0.718045	no	RAP2.12	TAS3C-5'D2[-]:RAP2.12	0.999925
AT1G54280.1	TAS3B-5'D7[+]	39	5.5	0.00222882	0.596639	no	NA	TAS3B-5'D7[+]:AT1G54280.1	0.999925
AT1G54570.1	TAS3C-5'D4[+]	1791	5	0.780087	0.97557	no	PES1	TAS3C-5'D4[+]:PES1	0.999925
AT1G55160.3	TAS3C-5'D3[+]	609	6	0.280831	0.917021	no	NA	TAS3C-5'D3[+]:AT1G55160.3	0.999925
AT1G56070.1	TAS1C-3'D6[-]	2382	5	1.74517	0.393672	no	LOS1	TAS1C-3'D6[-]:LOS1	0.999925
AT1G56110.1	TAS3C-5'D8[-]	1540	5	0.347696	0.402664	no	NOP56	TAS3C-5'D8[-]:NOP56	0.999925
AT1G56280.2	TAS3B-5'D7[+]	853	5.5	0.985138	0.755015	no	ATDI19	TAS3B-5'D7[+]:ATDI19	0.999925
AT1G57720.2	TAS3B-5'D8[+]	1181	6	0.338781	0.513098	no	NA	TAS3B-5'D8[+]:AT1G57720.2	0.999925
AT1G60620.1	TAS1C-3'D5[-]	1229	6	0.508171	1.23554	no	ATRPAC43	TAS1C-3'D5[-]:ATRPAC43	0.999925
AT1G61350.1	TAS3B-5'D6[+]	940	5.5	0.133729	0.86557	no	NA	TAS3B-5'D6[+]:AT1G61350.1	0.999925
AT1G63000.1	TAS3C-5'D2[-]	1161	4	0.162704	0.532496	no	NRS/ER	TAS3C-5'D2[-]:NRS/ER	0.999925
AT1G65440.3	TAS1B-3'D4[-]	4568	5.5	0.459137	0.882697	no	GTB1	TAS1B-3'D4[-]:GTB1	0.999925
AT1G65960.2	TAS3B-5'D6[+]	1452	6	1.74739	0.943365	no	GAD2	TAS3B-5'D6[+]:GAD2	0.999925
AT1G66260.2	TAS1B-3'D4[-]	316	5	0.436849	1.24293	no	NA	TAS1B-3'D4[-]:AT1G66260.2	0.999925
AT1G66350.1	TAS1C-3'D7[-]	1591	5	0.378899	0.664757	no	RGL	TAS1C-3'D7[-]:RGL	0.999925
AT1G67140.3	TAS3C-5'D3[+]	6105	5.5	0.00668646	0.690975	no	SWEETIE	TAS3C-5'D3[+]:SWEETIE	0.999925
AT1G67230.1	TAS1C-3'D5[-]	1584	6	0.492569	0.658689	no	CRWN1	TAS1C-3'D5[-]:CRWN1	0.999925
AT1G67480.2	TAS4-3'D3[-]	1281	5.5	0.147102	0.959006	no	NA	TAS4-3'D3[-]:AT1G67480.2	0.999925
AT1G70090.2	TAS3C-5'D5[+]	765	5.5	0.120356	1.12036	no	GATL9	TAS3C-5'D5[+]:GATL9	0.999925
AT1G70700.2	TAS1C-3'D5[-]	1014	6	1.07652	0.151523	no	JAZ9	TAS1C-3'D5[-]:JAZ9	0.999925
AT1G70940.1	TAS1B-3'D7[-]	2248	5.5	0.381128	1.08586	no	ATPIN3	TAS1B-3'D7[-]:ATPIN3	0.999925
AT1G71070.1	TAS3C-5'D3[+]	1649	5	0.820206	1.0515	no	NA	TAS3C-5'D3[+]:AT1G71070.1	0.999925
AT1G71440.1	TAS3B-5'D5[+]	1289	4.5	0.120356	0.919512	no	PFI	TAS3B-5'D5[+]:PFI	0.999925
AT1G72150.1	TAS1C-3'D8[-]	1004	6	0.144873	0.779859	no	PATL1	TAS1C-3'D8[-]:PATL1	0.999925
AT1G72150.1	TAS3C-5'D2[+]	114	6	0.505942	1.11557	no	PATL1	TAS3C-5'D2[+]:PATL1	0.999925
AT1G72470.1	TAS3B-5'D6[+]	435	4.5	0.133729	0.904029	no	ATEXO70D1	TAS3B-5'D6[+]:ATEXO70D1	0.999925
AT1G73760.1	TAS4-3'D4[+]	1036	6	0.597324	0.741379	no	NA	TAS4-3'D4[+]:AT1G73760.1	0.999925
AT1G74160.1	TAS3C-5'D9[+]	524	6	0.140416	0.456982	no	TRM4	TAS3C-5'D9[+]:TRM4	0.999925
AT1G75460.1	TAS3C-5'D5[+]	541	5.5	0.180534	0.682854	no	NA	TAS3C-5'D5[+]:AT1G75460.1	0.999925
AT1G75870.1	TAS1A-3'D7[-]	562	4.5	0.459137	1.19976	no	NA	TAS1A-3'D7[-]:AT1G75870.1	0.999925
AT1G75930.1	TAS3A-5'D5[+]	662	4.5	0.940562	1.26428	no	EXL6	TAS3A-5'D5[+]:EXL6	0.999925
AT1G75940.1	TAS2-3'D3[+]	1613	6	1.01188	0.367136	no	ATA27	TAS2-3'D3[+]:ATA27	0.999925
AT1G75950.1	TAS4-3'D4[+]	215	6	0.361069	0.643033	no	ASK1	TAS4-3'D4[+]:ASK1	0.999925
AT1G77520.1	TAS3B-5'D9[+]	1068	6	0.142644	0.798961	no	NA	TAS3B-5'D9[+]:AT1G77520.1	0.999925
AT1G78110.1	TAS3C-5'D3[+]	625	5.5	0.198365	0.826332	no	NA	TAS3C-5'D3[+]:AT1G78110.1	0.999925
AT1G79280.3	TAS3C-5'D7[+]	2956	5	0.263001	1.06784	no	AtTPR	TAS3C-5'D7[+]:AtTPR	0.999925
AT1G79640.2	TAS3B-5'D6[+]	1831	4.5	0.205051	1	no	NA	TAS3B-5'D6[+]:AT1G79640.2	0.999925
AT1G79940.4	TAS2-3'D5[+]	1255	5.5	0.209509	0.81768	no	ATERDJ2A	TAS2-3'D5[+]:ATERDJ2A	0.999925
AT2G02180.1	TAS3C-5'D9[+]	1100	4.5	0.35884	0.931263	no	TOM3	TAS3C-5'D9[+]:TOM3	0.999925
AT2G02760.1	TAS2-3'D6[+]	773	5	0.28306	0.797691	no	ATUBC2	TAS2-3'D6[+]:ATUBC2	0.999925
AT2G03820.1	TAS1C-3'D8[+]	1183	5	0.28306	0.602373	no	AtNMD3	TAS1C-3'D8[+]:AtNMD3	0.999925
AT2G04030.2	TAS1B-3'D10[+]	1259	6	0.138187	0.696998	no	AtHsp90.5	TAS1B-3'D10[+]:AtHsp90.5	0.999925
AT2G16910.1	TAS3B-5'D9[+]	920	5	0.158246	0.679599	no	AMS	TAS3B-5'D9[+]:AMS	0.999925
AT2G18020.1	TAS3C-5'D10[-]	425	6	0.474739	0.486997	no	EMB2296	TAS3C-5'D10[-]:EMB2296	0.999925
AT2G18969.1	TAS3A-5'D1[+]	328	6	0.254085	0.662221	no	NA	TAS3A-5'D1[+]:AT2G18969.1	0.999925
AT2G19760.1	TAS3C-5'D3[+]	93	5.5	0.463594	0.886589	no	PFN1	TAS3C-5'D3[+]:PFN1	0.999925
AT2G19950.2	TAS3A-5'D4[-]	2259	5	0.334323	0.895314	no	GC1	TAS3A-5'D4[-]:GC1	0.999925
AT2G20770.1	TAS3A-5'D1[+]	1345	5	0.160475	1.16047	no	GCL2	TAS3A-5'D1[+]:GCL2	0.999925
AT2G21660.2	TAS4-3'D2[-]	542	5.5	4.80533	0.371	no	ATGRP7	TAS4-3'D2[-]:ATGRP7	0.999925
AT2G21860.1	TAS4-3'D2[-]	1183	5	0.225111	0.959837	no	NA	TAS4-3'D2[-]:AT2G21860.1	0.999925
AT2G22795.1	TAS3B-5'D9[+]	1697	5.5	0.858096	1.00725	no	NA	TAS3B-5'D9[+]:AT2G22795.1	0.999925
AT2G24020.2	TAS1C-3'D1[-]	269	5	0.1315	0.57777	no	NA	TAS1C-3'D1[-]:AT2G24020.2	0.999925
AT2G25210.1	TAS3C-5'D4[-]	298	4	0.766714	0.724779	no	NA	TAS3C-5'D4[-]:AT2G25210.1	0.999925
AT2G25900.2	TAS3C-5'D3[+]	1415	6	0.238484	0.66256	no	ATCTH	TAS3C-5'D3[+]:ATCTH	0.999925
AT2G25900.2	TAS2-3'D8[-]	709	5.5	0.267458	0.897422	no	ATCTH	TAS2-3'D8[-]:ATCTH	0.999925
AT2G27510.1	TAS3B-5'D8[+]	266	6	0.164933	0.596879	no	ATFD3	TAS3B-5'D8[+]:ATFD3	0.999925
AT2G27800.1	TAS1A-3'D7[-]	586	6	0.247399	0.879058	no	NA	TAS1A-3'D7[-]:AT2G27800.1	0.999925
AT2G28790.1	TAS4-3'D2[+]	381	6	0.724366	0.528221	no	NA	TAS4-3'D2[+]:AT2G28790.1	0.999925
AT2G28910.1	TAS3B-5'D7[+]	560	5.5	0.447993	0.865454	no	CXIP4	TAS3B-5'D7[+]:CXIP4	0.999925
AT2G29960.2	TAS3B-5'D1[+]	277	5	0.118127	0.576187	no	ATCYP5	TAS3B-5'D1[+]:ATCYP5	0.999925
AT2G30200.2	TAS1A-3'D9[-]	1207	6	0.280831	0.605125	no	EMB3147	TAS1A-3'D9[-]:EMB3147	0.999925
AT2G30520.3	TAS1A-3'D10[-]	1670	5.5	0.300891	0.387648	no	RPT2	TAS1A-3'D10[-]:RPT2	0.999925
AT2G30570.1	TAS3B-5'D7[+]	263	6	1.40416	0.113668	no	PSBW	TAS3B-5'D7[+]:PSBW	0.999925
AT2G31140.1	TAS3A-5'D5[+]	299	6	0.198365	0.794582	no	NA	TAS3A-5'D5[+]:AT2G31140.1	0.999925
AT2G35260.1	TAS3C-5'D3[+]	1038	6	0.129272	0.610688	no	NA	TAS3C-5'D3[+]:AT2G35260.1	0.999925
AT2G36160.1	TAS1B-3'D4[-]	536	5.5	0.635214	0.481831	no	NA	TAS1B-3'D4[-]:AT2G36160.1	0.999925
AT2G38170.3	TAS1A-3'D7[-]	104	6	0.383357	0.834604	no	ATCAX1	TAS1A-3'D7[-]:ATCAX1	0.999925
AT2G38680.1	TAS3C-5'D3[+]	792	5	0.421247	0.963728	no	NA	TAS3C-5'D3[+]:AT2G38680.1	0.999925
AT2G39770.2	TAS4-3'D10[-]	1243	6	0.156017	0.579732	no	CYT1	TAS4-3'D10[-]:CYT1	0.999925
AT2G39800.4	TAS1C-3'D7[-]	2235	5	0.454679	0.896931	no	ATP5CS	TAS1C-3'D7[-]:ATP5CS	0.999925
AT2G40130.2	TAS3B-5'D4[+]	2398	6	0.209509	1.20951	no	NA	TAS3B-5'D4[+]:AT2G40130.2	0.999925
AT2G40205.1	TAS3B-5'D9[-]	105	4	1.05869	0.577774	no	NA	TAS3B-5'D9[-]:AT2G40205.1	0.999925
AT2G41070.3	TAS3B-5'D7[+]	44	6	0.00445764	0.862245	no	ATBZIP12	TAS3B-5'D7[+]:ATBZIP12	0.999925
AT2G41140.1	TAS3B-5'D8[+]	546	5	0.211738	0.76934	no	ATCBK3	TAS3B-5'D8[+]:ATCBK3	0.999925
AT2G41220.1	TAS3B-5'D1[+]	5018	5.5	0.329865	0.832558	no	GLU2	TAS3B-5'D1[+]:GLU2	0.999925
AT2G41900.1	TAS3B-5'D5[+]	2460	4.5	0.26523	1.01429	no	OXS2	TAS3B-5'D5[+]:OXS2	0.999925
AT2G41905.1	TAS4-3'D9[+]	92	6	0.238484	0.280404	no	NA	TAS4-3'D9[+]:AT2G41905.1	0.999925
AT2G42590.3	TAS1B-3'D8[-]	433	4.5	0.238484	0.463186	no	GF14 MU	TAS1B-3'D8[-]:GF14 MU	0.999925
AT2G43760.3	TAS3C-5'D9[+]	549	5.5	0.129272	0.820292	no	NA	TAS3C-5'D9[+]:AT2G43760.3	0.999925
AT2G44200.1	TAS3B-5'D5[+]	1138	5.5	0.153789	0.832708	no	NA	TAS3B-5'D5[+]:AT2G44200.1	0.999925
AT2G46820.2	TAS3B-5'D9[-]	803	4.5	0.209509	0.537471	no	PSAP	TAS3B-5'D9[-]:PSAP	0.999925
AT2G47070.1	TAS1C-3'D7[-]	2058	6	0.216195	0.763526	no	SPL1	TAS1C-3'D7[-]:SPL1	0.999925
AT2G47240.2	TAS1B-3'D3[+]	1187	5.5	0.256314	0.68936	no	CER8	TAS1B-3'D3[+]:CER8	0.999925
AT2G47650.2	TAS3B-5'D1[+]	778	5.5	0.298662	0.800733	no	UXS4	TAS3B-5'D1[+]:UXS4	0.999925
AT3G02080.1	TAS1C-3'D7[-]	447	5	0.909358	0.368037	no	NA	TAS1C-3'D7[-]:AT3G02080.1	0.999925
AT3G02230.1	TAS3A-5'D4[-]	1223	3.5	1.75408	0.758698	no	ATRGP1	TAS3A-5'D4[-]:ATRGP1	0.999925
AT3G02760.1	TAS3B-5'D6[+]	522	5.5	0.236255	0.723479	no	NA	TAS3B-5'D6[+]:AT3G02760.1	0.999925
AT3G03750.2	TAS3C-5'D1[+]	1024	5.5	0.258543	1.25854	no	SDG20	TAS3C-5'D1[+]:SDG20	0.999925
AT3G03940.1	TAS3B-5'D1[+]	2271	5	0.180534	0.506052	no	NA	TAS3B-5'D1[+]:AT3G03940.1	0.999925
AT3G04520.2	TAS1A-3'D7[-]	1042	6	0.363298	0.775571	no	THA2	TAS1A-3'D7[-]:THA2	0.999925
AT3G04920.1	TAS3A-5'D8[+]	255	5	0.661959	0.328391	no	NA	TAS3A-5'D8[+]:AT3G04920.1	0.999925
AT3G05020.1	TAS3C-5'D3[+]	258	5.5	2.65898	0.76869	no	ACP	TAS3C-5'D3[+]:ACP	0.999925
AT3G05530.1	TAS3C-5'D3[+]	311	5.5	0.532688	1.53269	no	ATS6A.2	TAS3C-5'D3[+]:ATS6A.2	0.999925
AT3G06480.1	TAS2-3'D9[-]	3314	5	0.254085	1.08067	no	NA	TAS2-3'D9[-]:AT3G06480.1	0.999925
AT3G06760.2	TAS3B-5'D7[+]	861	4	0.28306	0.84574	no	NA	TAS3B-5'D7[+]:AT3G06760.2	0.999925
AT3G06980.1	TAS2-3'D7[+]	2000	5.5	0.200594	0.820305	no	NA	TAS2-3'D7[+]:AT3G06980.1	0.999925
AT3G08550.1	TAS1B-3'D5[+]	1300	6	0.127043	0.779548	no	ABI8	TAS1B-3'D5[+]:ABI8	0.999925
AT3G08580.2	TAS3C-5'D9[-]	588	6	1.13224	0.298058	no	AAC1	TAS3C-5'D9[-]:AAC1	0.999925
AT3G09980.1	TAS1B-3'D9[-]	260	5.5	0.485883	0.764819	no	NA	TAS1B-3'D9[-]:AT3G09980.1	0.999925
AT3G10570.1	TAS4-3'D9[+]	1554	6	0.875926	0.328819	no	CYP77A6	TAS4-3'D9[+]:CYP77A6	0.999925
AT3G10730.1	TAS1C-3'D7[-]	1172	5	0.171619	0.561212	no	ATSUN2	TAS1C-3'D7[-]:ATSUN2	0.999925
AT3G11500.1	TAS4-3'D9[+]	286	4	0.240713	0.64305	no	NA	TAS4-3'D9[+]:AT3G11500.1	0.999925
AT3G11510.1	TAS4-3'D9[+]	685	5.5	0.844723	0.793037	no	NA	TAS4-3'D9[+]:AT3G11510.1	0.999925
AT3G11980.1	TAS3B-5'D7[+]	1817	5.5	0.213967	0.4253	no	FAR2	TAS3B-5'D7[+]:FAR2	0.999925
AT3G11980.1	TAS1B-3'D4[-]	221	6	0.1315	0.998034	no	FAR2	TAS1B-3'D4[-]:FAR2	0.999925
AT3G12110.1	TAS3C-5'D1[+]	804	6	0.249628	0.727509	no	ACT11	TAS3C-5'D1[+]:ACT11	0.999925
AT3G12260.1	TAS3A-5'D4[-]	259	6	0.840265	0.805791	no	NA	TAS3A-5'D4[-]:AT3G12260.1	0.999925
AT3G12360.1	TAS3A-5'D2[+]	446	5.5	0.162704	0.915741	no	ITN1	TAS3A-5'D2[+]:ITN1	0.999925
AT3G14230.3	TAS3C-5'D2[-]	1483	5	0.20728	0.942576	no	RAP2.2	TAS3C-5'D2[-]:RAP2.2	0.999925
AT3G16010.1	TAS1C-3'D6[+]	1916	6	0.142644	0.990341	no	NA	TAS1C-3'D6[+]:AT3G16010.1	0.999925
AT3G16630.2	TAS1C-3'D7[-]	2545	5.5	0.390043	0.848911	no	ATKINESIN-13A	TAS1C-3'D7[-]:ATKINESIN-13A	0.999925
AT3G16720.1	TAS3B-5'D7[+]	1045	5.5	0.22734	0.832242	no	ATL2	TAS3B-5'D7[+]:ATL2	0.999925
AT3G16785.1	TAS3C-5'D4[+]	1229	6	0.222882	1.22288	no	PLD ZETA 1	TAS3C-5'D4[+]:PLD ZETA 1	0.999925
AT3G17820.1	TAS3C-5'D2[-]	1272	6	0.296433	0.793904	no	ATGSKB6	TAS3C-5'D2[-]:ATGSKB6	0.999925
AT3G18060.1	TAS1B-3'D3[-]	1133	5	0.18945	0.911213	no	NA	TAS1B-3'D3[-]:AT3G18060.1	0.999925
AT3G20240.1	TAS3C-5'D3[+]	174	6	0.205051	0.811	no	NA	TAS3C-5'D3[+]:AT3G20240.1	0.999925
AT3G21250.2	TAS1A-3'D3[-]	2781	5.5	0.298662	1.05811	no	ABCC8	TAS1A-3'D3[-]:ABCC8	0.999925
AT3G22968.1	TAS3C-5'D2[-]	1782	5	0.171619	0.767771	no	CPuORF59	TAS3C-5'D2[-]:CPuORF59	0.999925
AT3G22970.2	TAS3C-5'D2[-]	1780	5	0.171619	0.767771	no	NA	TAS3C-5'D2[-]:AT3G22970.2	0.999925
AT3G23400.1	TAS3A-5'D8[+]	729	5.5	0.202823	0.736579	no	FIB4	TAS3A-5'D8[+]:FIB4	0.999925
AT3G25840.2	TAS3C-5'D3[+]	378	6	0.160475	0.775186	no	NA	TAS3C-5'D3[+]:AT3G25840.2	0.999925
AT3G26070.1	TAS4-3'D7[+]	1264	5	0.164933	1.16493	no	NA	TAS4-3'D7[+]:AT3G26070.1	0.999925
AT3G26110.1	TAS1B-3'D10[-]	528	5.5	0.410103	0.484926	no	NA	TAS1B-3'D10[-]:AT3G26110.1	0.999925
AT3G26300.1	TAS3C-5'D5[+]	307	5	0.242941	1	no	CYP71B34	TAS3C-5'D5[+]:CYP71B34	0.999925
AT3G28830.1	TAS3C-5'D2[+]	487	5.5	0.193907	0.612424	no	NA	TAS3C-5'D2[+]:AT3G28830.1	0.999925
AT3G30180.1	TAS3C-5'D1[+]	1460	6	0.52823	0.763832	no	BR6OX2	TAS3C-5'D1[+]:BR6OX2	0.999925
AT3G43860.1	TAS3C-5'D1[+]	1097	5	0.305348	0.856655	no	AtGH9A4	TAS3C-5'D1[+]:AtGH9A4	0.999925
AT3G44890.1	TAS3C-5'D3[+]	718	6	0.376671	0.78517	no	RPL9	TAS3C-5'D3[+]:RPL9	0.999925
AT3G46430.1	TAS3C-5'D3[+]	86	6	0.193907	0.441362	no	NA	TAS3C-5'D3[+]:AT3G46430.1	0.999925
AT3G47470.1	TAS4-3'D4[-]	291	5.5	0.512628	0.543079	no	CAB4	TAS4-3'D4[-]:CAB4	0.999925
AT3G47910.2	TAS3C-5'D3[+]	5340	4.5	0.291975	0.873431	no	NA	TAS3C-5'D3[+]:AT3G47910.2	0.999925
AT3G48430.1	TAS3C-5'D3[+]	3696	5.5	0.200594	0.763345	no	JMJ12	TAS3C-5'D3[+]:JMJ12	0.999925
AT3G48930.1	TAS3B-5'D9[+]	175	5.5	0.218424	0.399707	no	EMB1080	TAS3B-5'D9[+]:EMB1080	0.999925
AT3G50670.2	TAS4-3'D9[+]	1708	6	0.291975	1.01046	no	U1-70K	TAS4-3'D9[+]:U1-70K	0.999925
AT3G52110.2	TAS3C-5'D8[-]	1006	5.5	0.160475	0.954185	no	NA	TAS3C-5'D8[-]:AT3G52110.2	0.999925
AT3G52300.2	TAS3B-5'D5[+]	377	6	1.01411	0.402225	no	ATPQ	TAS3B-5'D5[+]:ATPQ	0.999925
AT3G52630.2	TAS2-3'D2[+]	150	6	0.205051	0.868308	no	NA	TAS2-3'D2[+]:AT3G52630.2	0.999925
AT3G53750.1	TAS3B-5'D7[-]	1371	4.5	0.456908	0.843804	no	ACT3	TAS3B-5'D7[-]:ACT3	0.999925
AT3G54050.2	TAS3B-5'D7[+]	1280	5.5	0.149331	0.485714	no	HCEF1	TAS3B-5'D7[+]:HCEF1	0.999925
AT3G54080.1	TAS1A-3'D10[-]	1213	5	0.423476	1.01429	no	NA	TAS1A-3'D10[-]:AT3G54080.1	0.999925
AT3G54340.1	TAS2-3'D3[+]	496	4.5	0.338781	0.557377	no	AP3	TAS2-3'D3[+]:AP3	0.999925
AT3G55200.1	TAS2-3'D3[-]	3150	4	0.00445764	0.993387	no	AtSAP130a	TAS2-3'D3[-]:AtSAP130a	0.999925
AT3G55220.1	TAS2-3'D3[-]	3150	4	0.231797	1	no	AtSAP130b	TAS2-3'D3[-]:AtSAP130b	0.999925
AT3G56360.1	TAS1B-3'D4[-]	361	5	0.138187	0.664355	no	NA	TAS1B-3'D4[-]:AT3G56360.1	0.999925
AT3G58140.1	TAS2-3'D9[+]	1136	5.5	0.184992	0.645488	no	NA	TAS2-3'D9[+]:AT3G58140.1	0.999925
AT3G59300.1	TAS2-3'D3[+]	1445	5	0.258543	0.896771	no	NA	TAS2-3'D3[+]:AT3G59300.1	0.999925
AT3G59940.1	TAS4-3'D9[+]	1241	6	0.200594	0.660401	no	NA	TAS4-3'D9[+]:AT3G59940.1	0.999925
AT3G61415.2	TAS1B-3'D4[-]	1188	6	0.216195	1.21619	no	ASK21	TAS1B-3'D4[-]:ASK21	0.999925
AT4G00830.4	TAS3C-5'D3[+]	475	5.5	0.00668646	0.820218	no	LIF2	TAS3C-5'D3[+]:LIF2	0.999925
AT4G01000.1	TAS1B-3'D4[-]	509	5.5	0.615154	1.11032	no	NA	TAS1B-3'D4[-]:AT4G01000.1	0.999925
AT4G02370.1	TAS3B-5'D5[+]	589	5.5	0.229568	0.64775	no	NA	TAS3B-5'D5[+]:AT4G02370.1	0.999925
AT4G02530.1	TAS3B-5'D9[+]	298	6	1.35512	1.31154	no	NA	TAS3B-5'D9[+]:AT4G02530.1	0.999925
AT4G02620.1	TAS3C-5'D1[+]	343	4.5	0.508171	0.824533	no	NA	TAS3C-5'D1[+]:AT4G02620.1	0.999925
AT4G03290.1	TAS3A-5'D1[+]	407	5	0.164933	0.749165	no	NA	TAS3A-5'D1[+]:AT4G03290.1	0.999925
AT4G04640.1	TAS4-3'D9[-]	1325	6	0.242941	0.669736	no	ATPC1	TAS4-3'D9[-]:ATPC1	0.999925
AT4G07825.1	TAS1B-3'D4[+]	213	5.5	0.158246	1	no	NA	TAS1B-3'D4[+]:AT4G07825.1	0.999925
AT4G11290.1	TAS4-3'D6[+]	117	5.5	0.222882	1.03783	no	NA	TAS4-3'D6[+]:AT4G11290.1	0.999925
AT4G13550.1	TAS1A-3'D7[-]	2490	5	0.35884	1.05906	no	NA	TAS1A-3'D7[-]:AT4G13550.1	0.999925
AT4G15520.1	TAS3B-5'D9[+]	598	5.5	0.180534	0.710327	no	NA	TAS3B-5'D9[+]:AT4G15520.1	0.999925
AT4G15802.1	TAS3A-5'D9[-]	529	3.5	0.205051	1.01884	no	AtHSBP	TAS3A-5'D9[-]:AtHSBP	0.999925
AT4G17150.2	TAS3B-5'D7[+]	1787	6	0.24517	1.03521	no	NA	TAS3B-5'D7[+]:AT4G17150.2	0.999925
AT4G18593.1	TAS3A-5'D3[+]	116	5.5	0.164933	1.03772	no	NA	TAS3A-5'D3[+]:AT4G18593.1	0.999925
AT4G18593.1	TAS1B-3'D4[-]	340	5.5	0.144873	0.787028	no	NA	TAS1B-3'D4[-]:AT4G18593.1	0.999925
AT4G19490.2	TAS3C-5'D10[-]	1563	6	0.238484	0.868682	no	ATVPS54	TAS3C-5'D10[-]:ATVPS54	0.999925
AT4G21460.1	TAS1C-3'D9[+]	653	6	0.133729	1.03038	no	NA	TAS1C-3'D9[+]:AT4G21460.1	0.999925
AT4G21660.2	TAS3B-5'D7[+]	1739	6	0.314264	0.724704	no	NA	TAS3B-5'D7[+]:AT4G21660.2	0.999925
AT4G21960.1	TAS3B-5'D7[+]	600	6	0.931647	0.397797	no	PRXR1	TAS3B-5'D7[+]:PRXR1	0.999925
AT4G23770.1	TAS1C-3'D8[+]	511	4	0.441306	0.812736	no	NA	TAS1C-3'D8[+]:AT4G23770.1	0.999925
AT4G24290.2	TAS3C-5'D3[+]	2072	5	0.167161	0.779653	no	NA	TAS3C-5'D3[+]:AT4G24290.2	0.999925
AT4G25370.1	TAS3B-5'D10[+]	775	5	1.07875	0.636344	no	NA	TAS3B-5'D10[+]:AT4G25370.1	0.999925
AT4G25620.1	TAS3C-5'D3[+]	1621	5	0.202823	0.873719	no	NA	TAS3C-5'D3[+]:AT4G25620.1	0.999925
AT4G26630.2	TAS3B-5'D9[+]	2186	6	0.271916	0.769439	no	NA	TAS3B-5'D9[+]:AT4G26630.2	0.999925
AT4G26630.2	TAS3B-5'D9[+]	969	6	0.129272	0.492547	no	NA	TAS3B-5'D9[+]:AT4G26630.2	0.999925
AT4G28310.1	TAS3C-5'D9[+]	560	6	0.314264	0.775198	no	NA	TAS3C-5'D9[+]:AT4G28310.1	0.999925
AT4G28750.1	TAS3A-5'D7[+]	329	6	0.390043	0.283013	no	PSAE-1	TAS3A-5'D7[+]:PSAE-1	0.999925
AT4G29060.2	TAS4-3'D4[+]	1144	6	0.303119	0.79691	no	emb2726	TAS4-3'D4[+]:emb2726	0.999925
AT4G29590.1	TAS1C-3'D8[-]	796	5	0.178306	0.851773	no	NA	TAS1C-3'D8[-]:AT4G29590.1	0.999925
AT4G30080.1	TAS1B-3'D5[+]	2211	6	0.222882	0.656562	no	ARF16	TAS1B-3'D5[+]:ARF16	0.999925
AT4G30440.1	TAS3B-5'D3[+]	1118	5.5	0.356611	0.85407	no	GAE1	TAS3B-5'D3[+]:GAE1	0.999925
AT4G31290.1	TAS4-3'D10[-]	387	5	0.258543	1.08659	no	NA	TAS4-3'D10[-]:AT4G31290.1	0.999925
AT4G31300.3	TAS3B-5'D1[+]	411	5	0.739968	1.02226	no	PBA1	TAS3B-5'D1[+]:PBA1	0.999925
AT4G31340.2	TAS1C-3'D7[+]	1503	6	0.405645	0.562258	no	NA	TAS1C-3'D7[+]:AT4G31340.2	0.999925
AT4G31340.2	TAS3C-5'D4[-]	1692	2	0.385586	0.670863	no	NA	TAS3C-5'D4[-]:AT4G31340.2	0.999925
AT4G32410.1	TAS1B-3'D4[-]	3035	6	0.22734	0.522619	no	AtCESA1	TAS1B-3'D4[-]:AtCESA1	0.999925
AT4G32850.9	TAS1A-3'D9[-]	2713	5	0.240713	0.863496	no	nPAP	TAS1A-3'D9[-]:nPAP	0.999925
AT4G33790.1	TAS3C-5'D8[-]	1417	5.5	0.142644	0.456652	no	CER4	TAS3C-5'D8[-]:CER4	0.999925
AT4G34160.1	TAS3B-5'D7[+]	285	5.5	0.234026	1.23403	no	CYCD3	TAS3B-5'D7[+]:CYCD3	0.999925
AT4G34480.1	TAS3A-5'D1[+]	1379	6	0.247399	1.06671	no	NA	TAS3A-5'D1[+]:AT4G34480.1	0.999925
AT4G34510.1	TAS4-3'D4[-]	237	5.5	0.178306	1.17831	no	KCS17	TAS4-3'D4[-]:KCS17	0.999925
AT4G34620.1	TAS1C-3'D7[-]	524	5.5	0.173848	0.288006	no	SSR16	TAS1C-3'D7[-]:SSR16	0.999925
AT4G35890.1	TAS1B-3'D4[+]	1380	5.5	0.336552	1.09896	no	AtLARP1c	TAS1B-3'D4[+]:AtLARP1c	0.999925
AT4G37980.2	TAS1B-3'D9[+]	680	4.5	0.826892	1.10072	no	ATCAD7	TAS1B-3'D9[+]:ATCAD7	0.999925
AT4G39480.1	TAS3A-5'D4[-]	1539	6	0.24517	0.689145	no	CYP96A9	TAS3A-5'D4[-]:CYP96A9	0.999925
AT4G39740.1	TAS1A-3'D8[-]	444	5	0.229568	0.971814	no	HCC2	TAS1A-3'D8[-]:HCC2	0.999925
AT4G39900.1	TAS3B-5'D2[+]	751	6	0.196136	0.796636	no	NA	TAS3B-5'D2[+]:AT4G39900.1	0.999925
AT4G39960.1	TAS3C-5'D2[-]	1595	4	0.142644	0.772476	no	NA	TAS3C-5'D2[-]:AT4G39960.1	0.999925
AT4G40030.3	TAS3C-5'D9[-]	826	5	0.474739	0.2953	no	NA	TAS3C-5'D9[-]:AT4G40030.3	0.999925
AT5G01210.1	TAS3B-5'D5[+]	1449	6	0.381128	1.18559	no	NA	TAS3B-5'D5[+]:AT5G01210.1	0.999925
AT5G01410.1	TAS1C-3'D7[-]	1134	4.5	0.461366	0.265274	no	ATPDX1	TAS1C-3'D7[-]:ATPDX1	0.999925
AT5G01410.1	TAS4-3'D6[+]	694	6	0.731053	0.339948	no	ATPDX1	TAS4-3'D6[+]:ATPDX1	0.999925
AT5G01820.1	TAS1A-3'D7[-]	1309	5.5	0.171619	0.860808	no	ATCIPK14	TAS1A-3'D7[-]:ATCIPK14	0.999925
AT5G02120.1	TAS2-3'D5[+]	339	6	0.231797	0.524517	no	OHP	TAS2-3'D5[+]:OHP	0.999925
AT5G03670.1	TAS3A-5'D1[+]	1323	6	0.0780087	0.871995	no	TRM28	TAS3A-5'D1[+]:TRM28	0.999925
AT5G04180.1	TAS1A-3'D3[-]	626	5	0.334323	0.705421	no	ACA3	TAS1A-3'D3[-]:ACA3	0.999925
AT5G04280.1	TAS4-3'D4[+]	434	5.5	0.202823	0.913658	no	AtRZ-1c	TAS4-3'D4[+]:AtRZ-1c	0.999925
AT5G04600.1	TAS3B-5'D9[+]	623	5.5	0.612925	0.827363	no	NA	TAS3B-5'D9[+]:AT5G04600.1	0.999925
AT5G04830.2	TAS4-3'D1[+]	276	4	0.220653	0.179348	no	NA	TAS4-3'D1[+]:AT5G04830.2	0.999925
AT5G06440.4	TAS3C-5'D3[+]	1748	5	0.191678	0.86283	no	NA	TAS3C-5'D3[+]:AT5G06440.4	0.999925
AT5G07030.1	TAS1A-3'D2[+]	965	4	0.263001	0.518135	no	NA	TAS1A-3'D2[+]:AT5G07030.1	0.999925
AT5G07530.2	TAS3B-5'D6[+]	635	5.5	6.67754	0.0053709	no	ATGRP-7	TAS3B-5'D6[+]:ATGRP-7	0.999925
AT5G09810.1	TAS1C-3'D5[+]	1319	5.5	1.10549	0.394158	no	ACT7	TAS1C-3'D5[+]:ACT7	0.999925
AT5G10020.2	TAS4-3'D1[-]	741	6	0.258543	1.25854	no	NA	TAS4-3'D1[-]:AT5G10020.2	0.999925
AT5G10730.1	TAS3B-5'D5[+]	862	6	0.967308	0.300466	no	NA	TAS3B-5'D5[+]:AT5G10730.1	0.999925
AT5G10860.1	TAS3C-5'D7[-]	800	5.5	0.842494	0.884449	no	CBSX3	TAS3C-5'D7[-]:CBSX3	0.999925
AT5G11670.1	TAS1A-3'D5[-]	540	6	0.240713	0.842584	no	ATNADP-ME2	TAS1A-3'D5[-]:ATNADP-ME2	0.999925
AT5G12230.1	TAS3C-5'D2[+]	836	5	0.367755	0.98082	no	MED19A	TAS3C-5'D2[+]:MED19A	0.999925
AT5G13100.1	TAS1B-3'D4[-]	1010	4.5	0.153789	0.649792	no	NA	TAS1B-3'D4[-]:AT5G13100.1	0.999925
AT5G13420.1	TAS3B-5'D7[+]	1329	5.5	0.260772	0.527348	no	TRA2	TAS3B-5'D7[+]:TRA2	0.999925
AT5G14030.4	TAS1A-3'D2[-]	645	5	0.205051	0.401188	no	NA	TAS1A-3'D2[-]:AT5G14030.4	0.999925
AT5G14140.1	TAS3C-5'D9[+]	823	6	0.187221	0.540961	no	NA	TAS3C-5'D9[+]:AT5G14140.1	0.999925
AT5G14440.2	TAS3C-5'D8[-]	569	5.5	0.205051	0.755473	no	NA	TAS3C-5'D8[-]:AT5G14440.2	0.999925
AT5G14570.1	TAS3C-5'D3[+]	1625	6	0.661959	1.22912	no	ATNRT2.7	TAS3C-5'D3[+]:ATNRT2.7	0.999925
AT5G15350.1	TAS1C-3'D5[-]	368	6	0.492569	0.865576	no	AtENODL17	TAS1C-3'D5[-]:AtENODL17	0.999925
AT5G16010.1	TAS3C-5'D9[-]	749	6	0.612925	0.824535	no	NA	TAS3C-5'D9[-]:AT5G16010.1	0.999925
AT5G16210.1	TAS3B-5'D10[+]	3479	6	0.278602	0.861793	no	NA	TAS3B-5'D10[+]:AT5G16210.1	0.999925
AT5G16780.1	TAS3B-5'D9[+]	602	5	0.22734	0.992789	no	DOT2	TAS3B-5'D9[+]:DOT2	0.999925
AT5G18700.1	TAS2-3'D4[-]	3996	6	0.240713	0.781105	no	EMB3013	TAS2-3'D4[-]:EMB3013	0.999925
AT5G19980.1	TAS3C-5'D10[-]	559	4.5	0.200594	0.990803	no	GONST4	TAS3C-5'D10[-]:GONST4	0.999925
AT5G19990.1	TAS3B-5'D6[+]	963	4.5	0.236255	0.834504	no	ATSUG1	TAS3B-5'D6[+]:ATSUG1	0.999925
AT5G20000.1	TAS4-3'D9[+]	1491	5	0.278602	0.583786	no	NA	TAS4-3'D9[+]:AT5G20000.1	0.999925
AT5G20190.1	TAS1A-3'D6[+]	644	5.5	0.260772	0.641588	no	NA	TAS1A-3'D6[+]:AT5G20190.1	0.999925
AT5G22580.1	TAS3C-5'D3[+]	170	6	0.762256	0.173177	no	NA	TAS3C-5'D3[+]:AT5G22580.1	0.999925
AT5G22580.1	TAS1A-3'D5[-]	537	5	0.298662	1.10423	no	NA	TAS1A-3'D5[-]:AT5G22580.1	0.999925
AT5G22950.1	TAS3A-5'D2[+]	720	6	0.568349	0.893356	no	VPS24.1	TAS3A-5'D2[+]:VPS24.1	0.999925
AT5G23750.2	TAS3A-5'D9[+]	466	6	0.294204	1.04687	no	NA	TAS3A-5'D9[+]:AT5G23750.2	0.999925
AT5G24690.1	TAS1B-3'D4[-]	1035	6	0.251857	0.996452	no	NA	TAS1B-3'D4[-]:AT5G24690.1	0.999925
AT5G25940.1	TAS1C-3'D2[+]	177	4.5	0.49034	1.08609	no	NA	TAS1C-3'D2[+]:AT5G25940.1	0.999925
AT5G26742.3	TAS3A-5'D7[+]	1804	6	0.54829	0.66243	no	AtRH3	TAS3A-5'D7[+]:AtRH3	0.999925
AT5G26860.1	TAS3C-5'D8[-]	2583	5.5	0.236255	1.01463	no	LON1	TAS3C-5'D8[-]:LON1	0.999925
AT5G27150.1	TAS1B-3'D10[-]	2172	6	0.218424	0.956268	no	AT-NHX1	TAS1B-3'D10[-]:AT-NHX1	0.999925
AT5G27650.1	TAS3C-5'D3[+]	428	5.5	0.403416	1.16461	no	NA	TAS3C-5'D3[+]:AT5G27650.1	0.999925
AT5G28640.1	TAS2-3'D3[-]	988	5	0.363298	0.871735	no	AN3	TAS2-3'D3[-]:AN3	0.999925
AT5G33370.2	TAS3C-5'D4[-]	1300	3.5	5.88408	0.631801	no	NA	TAS3C-5'D4[-]:AT5G33370.2	0.999925
AT5G35630.3	TAS2-3'D4[+]	1421	6	0.236255	0.284202	no	ATGSL1	TAS2-3'D4[+]:ATGSL1	0.999925
AT5G42020.2	TAS3C-5'D8[+]	2013	5.5	0.833579	0.401171	no	BIP	TAS3C-5'D8[+]:BIP	0.999925
AT5G42530.1	TAS3C-5'D1[-]	333	5	0.71768	1.32493	no	NA	TAS3C-5'D1[-]:AT5G42530.1	0.999925
AT5G44720.2	TAS1C-3'D9[+]	637	6	0.39673	0.973589	no	NA	TAS1C-3'D9[+]:AT5G44720.2	0.999925
AT5G45630.1	TAS3B-5'D9[+]	164	4.5	0.133729	1.13373	no	NA	TAS3B-5'D9[+]:AT5G45630.1	0.999925
AT5G46730.2	TAS4-3'D2[-]	597	4	0.626298	0.705901	no	NA	TAS4-3'D2[-]:AT5G46730.2	0.999925
AT5G46760.1	TAS3B-5'D7[+]	1268	5.5	0.220653	1.01482	no	MYC3	TAS3B-5'D7[+]:MYC3	0.999925
AT5G46840.2	TAS3A-5'D9[+]	189	6	0.236255	0.970262	no	NA	TAS3A-5'D9[+]:AT5G46840.2	0.999925
AT5G46840.2	TAS3C-5'D5[+]	534	5	0.182763	0.735335	no	NA	TAS3C-5'D5[+]:AT5G46840.2	0.999925
AT5G47120.1	TAS3C-5'D3[+]	773	6	0.196136	0.577891	no	ATBI-1	TAS3C-5'D3[+]:ATBI-1	0.999925
AT5G47630.2	TAS3B-5'D7[-]	663	5.5	0.378899	0.984093	no	mtACP3	TAS3B-5'D7[-]:mtACP3	0.999925
AT5G48020.1	TAS1C-3'D2[+]	844	6	0.403416	1.11314	no	NA	TAS1C-3'D2[+]:AT5G48020.1	0.999925
AT5G48840.1	TAS1C-3'D1[-]	831	6	0.485883	1.48588	no	ATPTS	TAS1C-3'D1[-]:ATPTS	0.999925
AT5G52040.4	TAS3C-5'D3[+]	1445	6	0.334323	0.648845	no	At-RS41	TAS3C-5'D3[+]:At-RS41	0.999925
AT5G52060.1	TAS3B-5'D7[+]	254	4	0.294204	0.934048	no	ATBAG1	TAS3B-5'D7[+]:ATBAG1	0.999925
AT5G53330.1	TAS1A-3'D9[-]	649	5	0.795689	0.952701	no	NA	TAS1A-3'D9[-]:AT5G53330.1	0.999925
AT5G58170.1	TAS1A-3'D2[+]	2394	6	0.601781	1.07639	no	GDPDL7	TAS1A-3'D2[+]:GDPDL7	0.999925
AT5G58590.1	TAS3C-5'D3[+]	711	6	0.401188	0.885862	no	RANBP1	TAS3C-5'D3[+]:RANBP1	0.999925
AT5G59450.1	TAS3B-5'D6[+]	643	5	0.127043	0.711539	no	NA	TAS3B-5'D6[+]:AT5G59450.1	0.999925
AT5G59750.2	TAS1C-3'D5[-]	1399	4.5	0.238484	1.08388	no	AtRIBA3	TAS1C-3'D5[-]:AtRIBA3	0.999925
AT5G59950.5	TAS3B-5'D5[+]	1167	4	0.236255	0.887941	no	NA	TAS3B-5'D5[+]:AT5G59950.5	0.999925
AT5G60670.1	TAS3C-5'D3[+]	305	6	0.554976	0.52	no	NA	TAS3C-5'D3[+]:AT5G60670.1	0.999925
AT5G61770.3	TAS3B-5'D7[+]	1052	5.5	0.421247	0.896019	no	PPAN	TAS3B-5'D7[+]:PPAN	0.999925
AT5G61800.1	TAS3B-5'D6[+]	1365	6	0.474739	0.97639	no	NA	TAS3B-5'D6[+]:AT5G61800.1	0.999925
AT5G61820.1	TAS1C-3'D5[-]	1236	6	0.624069	0.852574	no	NA	TAS1C-3'D5[-]:AT5G61820.1	0.999925
AT5G62130.2	TAS3B-5'D7[-]	294	5	0.205051	0.692571	no	NA	TAS3B-5'D7[-]:AT5G62130.2	0.999925
AT5G63160.1	TAS3C-5'D8[-]	1027	6	0.436849	0.958375	no	BT1	TAS3C-5'D8[-]:BT1	0.999925
AT5G63700.1	TAS3C-5'D2[+]	609	6	0.18945	1.00755	no	NA	TAS3C-5'D2[+]:AT5G63700.1	0.999925
AT5G64170.2	TAS3B-5'D9[+]	1869	5	0.49034	1.01211	no	NA	TAS3B-5'D9[+]:AT5G64170.2	0.999925
AT5G65220.1	TAS3B-5'D9[+]	450	6	1.45765	0.537712	no	NA	TAS3B-5'D9[+]:AT5G65220.1	0.999925
AT5G66760.1	TAS1C-3'D5[-]	1777	6	0.225111	0.645402	no	SDH1-1	TAS1C-3'D5[-]:SDH1-1	0.999925
AT5G67070.1	TAS3A-5'D4[-]	137	5	0.220653	0.559607	no	RALFL34	TAS3A-5'D4[-]:RALFL34	0.999925
AT5G67490.1	TAS3C-5'D3[+]	693	5	0.39673	1.06095	no	NA	TAS3C-5'D3[+]:AT5G67490.1	0.999925
ATCG00380.1	TAS3B-5'D8[+]	235	6	0.492569	0.291964	no	RPS4	TAS3B-5'D8[+]:RPS4	0.999925
ATCG00830.1	TAS3B-5'D9[+]	771	4.5	1.24368	0.205708	no	RPL2.1	TAS3B-5'D9[+]:RPL2.1	0.999925
ATCG01040.1	TAS1B-3'D9[+]	199	3.5	0.200594	0.0502364	no	YCF5	TAS1B-3'D9[+]:YCF5	0.999925
ATCG01130.1	TAS3C-5'D4[+]	4586	6	0.461366	0.379291	no	YCF1.2	TAS3C-5'D4[+]:YCF1.2	0.999925

## Sheet: Col-0 (-Xrn1) (biorep #3)
Target transcript	tasiRNA	tasiRNA slice site position in target transcript	Allen score of sRNA:target duplex	Slice site RPM	Slice site RPM + 1/Maximum adjacent site RPM + 1	Previously verified by 5' RACE?	Target gene common name	Interaction name	P-value adjusted for multiple testing
AT1G50055.1	TAS1A-3'D6[-]	487	0	0.233994	0.966404	no	TAS1b	TAS1A-3'D6[-]:TAS1b	0
AT5G18040.1	TAS1A-3'D2[+]	685	2	1.14852	1.73017	yes	NA	TAS1A-3'D2[+]:AT5G18040.1	0.00255722
AT4G29770.2	TAS1A-3'D6[+]	780	3	0.479687	1.47969	yes	NA	TAS1A-3'D6[+]:AT4G29770.2	0.061729
AT2G33860.1	TAS3A-5'D7[+]	1684	1.5	0.36464	0.846402	yes	ARF3	TAS3A-5'D7[+]:ARF3	0.174116
AT3G28030.1	TAS2-3'D6[-]	2229	4	0.614234	1.61423	no	UVH3	TAS2-3'D6[-]:UVH3	0.238029
AT5G62000.4	TAS3A-5'D7[+]	1745	1.5	0.241794	0.708512	yes	ARF1-BP	TAS3A-5'D7[+]:ARF1-BP	0.238029
AT5G41070.1	TAS3C-5'D1[+]	712	2.5	0.263243	0.899977	no	DRB5	TAS3C-5'D1[+]:DRB5	0.282551
AT2G25930.1	TAS3C-5'D10[+]	2440	5	2.11179	2.09472	no	ELF3	TAS3C-5'D10[+]:ELF3	0.443357
AT2G40050.2	TAS3C-5'D2[+]	1336	4	0.222294	1.22229	no	NA	TAS3C-5'D2[+]:AT2G40050.2	0.443357
AT4G18030.1	TAS1C-3'D7[-]	1758	4	1.09197	1.23622	no	NA	TAS1C-3'D7[-]:AT4G18030.1	0.443357
AT4G18300.1	TAS3C-5'D8[-]	2118	6	1.24017	1.86853	no	NA	TAS3C-5'D8[-]:AT4G18300.1	0.443357
AT3G59550.1	TAS4-3'D1[-]	2134	4	0.193045	1.19304	no	ATRAD21.2	TAS4-3'D1[-]:ATRAD21.2	0.493195
AT5G27610.1	TAS4-3'D8[-]	1340	4	0.202795	1.2028	no	ALY1	TAS4-3'D8[-]:ALY1	0.493195
AT3G09080.1	TAS1B-3'D10[+]	2235	5	0.409489	1.40949	no	NA	TAS1B-3'D10[+]:AT3G09080.1	0.493626
AT3G18910.1	TAS1A-3'D7[-]	1122	6	1.18362	1.58654	no	ETP2	TAS1A-3'D7[-]:ETP2	0.644357
AT1G53450.2	TAS2-3'D9[+]	1611	4	0.253493	1.10674	no	NA	TAS2-3'D9[+]:AT1G53450.2	0.646666
AT4G13770.1	TAS3C-5'D10[-]	266	5	0.315892	1.31589	no	CYP83A1	TAS3C-5'D10[-]:CYP83A1	0.646666
AT4G32800.1	TAS1B-3'D8[+]	889	5	0.323691	1.32369	no	NA	TAS1B-3'D8[+]:AT4G32800.1	0.646666
AT1G04300.4	TAS3C-5'D9[+]	932	3	0.146246	0.752828	no	NA	TAS3C-5'D9[+]:AT1G04300.4	0.654232
AT3G62000.2	TAS1C-3'D6[-]	980	6	0.454338	1.45434	no	NA	TAS1C-3'D6[-]:AT3G62000.2	0.758211
AT1G66330.2	TAS3C-5'D3[+]	603	3	0.173545	0.715758	no	NA	TAS3C-5'D3[+]:AT1G66330.2	0.768297
AT5G60120.2	TAS3B-5'D9[+]	1693	3	0.138446	0.738251	no	TOE2	TAS3B-5'D9[+]:TOE2	0.768297
AT1G64380.1	TAS3B-5'D7[+]	870	4	0.253493	1.25349	no	NA	TAS3B-5'D7[+]:AT1G64380.1	0.801919
AT5G25940.1	TAS1C-3'D2[+]	177	4.5	1.27917	1.33454	no	NA	TAS1C-3'D2[+]:AT5G25940.1	0.801919
AT4G17150.2	TAS3B-5'D7[+]	1787	6	0.662983	1.66298	no	NA	TAS3B-5'D7[+]:AT4G17150.2	0.883091
AT1G05710.5	TAS3A-5'D1[+]	602	4.5	0.616184	1.12639	no	NA	TAS3A-5'D1[+]:AT1G05710.5	0.921477
AT2G39675.1	TAS1A-3'D10[-]	492	3	0.423139	0.804815	no	TAS1c	TAS1A-3'D10[-]:TAS1c	0.921477
AT4G34860.2	TAS3A-5'D6[+]	2012	4	0.403639	0.990369	no	A/N-InvB	TAS3A-5'D6[+]:A/N-InvB	0.921477
AT1G08960.1	TAS1B-3'D5[+]	1460	4	0.319792	1.0336	no	ATCAX11	TAS1B-3'D5[+]:ATCAX11	0.935851
AT5G44870.1	TAS3C-5'D7[-]	1527	5	0.165746	1.16575	no	LAZ5	TAS3C-5'D7[-]:LAZ5	0.954681
AT1G51670.1	TAS1A-3'D6[+]	536	3.5	0.111147	0.956363	no	NA	TAS1A-3'D6[+]:AT1G51670.1	0.967122
AT1G80110.1	TAS1C-3'D7[-]	388	4.5	0.39194	1.22687	no	ATPP2-B11	TAS1C-3'D7[-]:ATPP2-B11	0.967122
AT5G14940.1	TAS3C-5'D1[+]	1107	6	0.510887	1.51089	no	NA	TAS3C-5'D1[+]:AT5G14940.1	0.967122
AT1G01090.1	TAS3C-5'D5[+]	1001	5.5	0.194995	0.412174	no	PDH-E1 ALPHA	TAS3C-5'D5[+]:PDH-E1 ALPHA	0.999927
AT1G01820.1	TAS1A-3'D2[-]	823	6	0.249593	0.693668	no	PEX11C	TAS1A-3'D2[-]:PEX11C	0.999927
AT1G02190.2	TAS3A-5'D4[+]	1614	6	0.838478	0.719812	no	NA	TAS3A-5'D4[+]:AT1G02190.2	0.999927
AT1G02190.2	TAS3A-5'D9[+]	1795	6	0.183295	0.439468	no	NA	TAS3A-5'D9[+]:AT1G02190.2	0.999927
AT1G02370.1	TAS1B-3'D4[-]	402	4.5	0.128697	0.77195	no	NA	TAS1B-3'D4[-]:AT1G02370.1	0.999927
AT1G02730.1	TAS3A-5'D4[-]	3172	6	0.198895	0.71175	no	ATCSLD5	TAS3A-5'D4[-]:ATCSLD5	0.999927
AT1G03080.1	TAS1A-3'D9[-]	5175	5.5	0.232044	0.546174	no	NET1D	TAS1A-3'D9[-]:NET1D	0.999927
AT1G03730.1	TAS3B-5'D3[+]	868	5.5	0.105297	0.653159	no	NA	TAS3B-5'D3[+]:AT1G03730.1	0.999927
AT1G04270.2	TAS1A-3'D5[+]	82	5	0.302242	0.258567	no	RPS15	TAS1A-3'D5[+]:RPS15	0.999927
AT1G04770.1	TAS3A-5'D8[+]	931	5.5	0.298342	0.598323	no	NA	TAS3A-5'D8[+]:AT1G04770.1	0.999927
AT1G04810.1	TAS3B-5'D10[+]	2247	6	0.148196	0.881707	no	NA	TAS3B-5'D10[+]:AT1G04810.1	0.999927
AT1G04870.2	TAS2-3'D1[-]	596	6	0.161846	0.74124	no	ATPRMT10	TAS2-3'D1[-]:ATPRMT10	0.999927
AT1G05090.1	TAS3B-5'D6[+]	326	5.5	0.0311992	0.905795	no	NA	TAS3B-5'D6[+]:AT1G05090.1	0.999927
AT1G05835.1	TAS4-3'D9[+]	180	4.5	0.497237	0.985877	no	NA	TAS4-3'D9[+]:AT1G05835.1	0.999927
AT1G05910.1	TAS1A-3'D6[-]	499	5.5	0.198895	1.1989	no	NA	TAS1A-3'D6[-]:AT1G05910.1	0.999927
AT1G07320.4	TAS1B-3'D4[-]	853	6	0.243744	0.113035	no	EMB2784	TAS1B-3'D4[-]:EMB2784	0.999927
AT1G08640.1	TAS3B-5'D5[+]	747	6	0.345141	0.615465	no	CJD1	TAS3B-5'D5[+]:CJD1	0.999927
AT1G09070.1	TAS3B-5'D2[+]	533	5.5	0.577185	0.593058	no	(AT)SRC2	TAS3B-5'D2[+]:(AT)SRC2	0.999927
AT1G10060.3	TAS4-3'D6[+]	1557	5	0.253493	0.490027	no	ATBCAT-1	TAS4-3'D6[+]:ATBCAT-1	0.999927
AT1G10670.4	TAS4-3'D4[+]	690	5.5	0.107247	0.51676	no	ACLA-1	TAS4-3'D4[+]:ACLA-1	0.999927
AT1G10830.2	TAS2-3'D6[+]	1394	5.5	0.300292	0.487867	no	Z-ISO	TAS2-3'D6[+]:Z-ISO	0.999927
AT1G10950.1	TAS2-3'D4[+]	2156	4.5	0.206695	0.958194	no	AtTMN1	TAS2-3'D4[+]:AtTMN1	0.999927
AT1G11280.4	TAS3C-5'D9[+]	1789	5	0.103347	0.739813	no	NA	TAS3C-5'D9[+]:AT1G11280.4	0.999927
AT1G11860.3	TAS3B-5'D1[+]	1447	6	0.161846	0.398862	no	NA	TAS3B-5'D1[+]:AT1G11860.3	0.999927
AT1G11910.1	TAS4-3'D7[-]	1668	5	0.651283	0.505321	no	APA1	TAS4-3'D7[-]:APA1	0.999927
AT1G12080.2	TAS3C-5'D8[-]	300	6	1.09392	0.299466	no	NA	TAS3C-5'D8[-]:AT1G12080.2	0.999927
AT1G12270.1	TAS3B-5'D9[+]	1573	6	0.144296	0.769281	no	Hop1	TAS3B-5'D9[+]:Hop1	0.999927
AT1G13690.1	TAS3C-5'D3[+]	550	5.5	0.138446	0.680591	no	ATE1	TAS3C-5'D3[+]:ATE1	0.999927
AT1G14460.1	TAS3C-5'D9[+]	160	4.5	0.00194995	0.67447	no	NA	TAS3C-5'D9[+]:AT1G14460.1	0.999927
AT1G15270.1	TAS3B-5'D9[+]	207	6	2.10009	0.490109	no	NA	TAS3B-5'D9[+]:AT1G15270.1	0.999927
AT1G15690.2	TAS4-3'D4[-]	1074	4	0.327591	0.623569	no	AtAVP1	TAS4-3'D4[-]:AtAVP1	0.999927
AT1G17190.1	TAS3A-5'D6[+]	674	6	0.269093	0.757811	no	ATGSTU26	TAS3A-5'D6[+]:ATGSTU26	0.999927
AT1G18540.1	TAS4-3'D8[+]	728	4.5	0.261293	0.474624	no	NA	TAS4-3'D8[+]:AT1G18540.1	0.999927
AT1G18740.1	TAS3B-5'D5[+]	1137	4	0.157946	0.678796	no	NA	TAS3B-5'D5[+]:AT1G18740.1	0.999927
AT1G19100.1	TAS2-3'D5[+]	1881	5.5	0.198895	0.976184	no	AtMORC6	TAS2-3'D5[+]:AtMORC6	0.999927
AT1G20190.1	TAS3B-5'D9[-]	824	5.5	0.261293	0.644363	no	ATEXP11	TAS3B-5'D9[-]:ATEXP11	0.999927
AT1G20440.1	TAS3C-5'D3[+]	485	5.5	0.222294	0.386021	no	AtCOR47	TAS3C-5'D3[+]:AtCOR47	0.999927
AT1G20450.2	TAS3C-5'D8[+]	1337	6	0.542086	0.360645	no	ERD10	TAS3C-5'D8[+]:ERD10	0.999927
AT1G22160.1	TAS1A-3'D3[+]	327	5.5	0.288592	0.629466	no	NA	TAS1A-3'D3[+]:AT1G22160.1	0.999927
AT1G22380.1	TAS3C-5'D4[+]	583	6	0.233994	0.901686	no	AtUGT85A3	TAS3C-5'D4[+]:AtUGT85A3	0.999927
AT1G22380.1	TAS4-3'D7[+]	903	5.5	0.249593	0.775984	no	AtUGT85A3	TAS4-3'D7[+]:AtUGT85A3	0.999927
AT1G22640.1	TAS2-3'D9[+]	476	5.5	0.175495	0.431264	no	ATMYB3	TAS2-3'D9[+]:ATMYB3	0.999927
AT1G23190.1	TAS3C-5'D9[+]	1230	5	0.187195	0.609545	no	PGM3	TAS3C-5'D9[+]:PGM3	0.999927
AT1G23190.1	TAS3B-5'D6[+]	1786	6	0.226194	0.574365	no	PGM3	TAS3B-5'D6[+]:PGM3	0.999927
AT1G23820.2	TAS3B-5'D9[+]	242	4.5	0.38609	0.930613	no	SPDS1	TAS3B-5'D9[+]:SPDS1	0.999927
AT1G26270.1	TAS3B-5'D7[+]	1969	6	0.198895	0.781403	no	NA	TAS3B-5'D7[+]:AT1G26270.1	0.999927
AT1G26640.1	TAS3A-5'D6[+]	120	6	0.440688	1.19391	no	NA	TAS3A-5'D6[+]:AT1G26640.1	0.999927
AT1G26710.1	TAS3B-5'D6[+]	589	5.5	0.350991	0.866223	no	NA	TAS3B-5'D6[+]:AT1G26710.1	0.999927
AT1G29470.2	TAS4-3'D1[-]	1529	4	0.226194	0.803279	no	NA	TAS4-3'D1[-]:AT1G29470.2	0.999927
AT1G32130.2	TAS4-3'D2[-]	278	5	0.401689	0.789204	no	ATIWS1	TAS4-3'D2[-]:ATIWS1	0.999927
AT1G32530.1	TAS4-3'D9[+]	1096	6	0.403639	1.17268	no	NA	TAS4-3'D9[+]:AT1G32530.1	0.999927
AT1G33240.1	TAS1B-3'D10[+]	587	6	0.487487	0.282653	no	AT-GTL1	TAS1B-3'D10[+]:AT-GTL1	0.999927
AT1G34030.1	TAS3C-5'D2[+]	355	6	0.992524	0.370655	no	NA	TAS3C-5'D2[+]:AT1G34030.1	0.999927
AT1G34350.2	TAS3C-5'D8[+]	786	5.5	0.0916476	0.817474	no	NA	TAS3C-5'D8[+]:AT1G34350.2	0.999927
AT1G43170.9	TAS2-3'D8[-]	1172	5	0.177445	0.166813	no	ARP1	TAS2-3'D8[-]:ARP1	0.999927
AT1G43710.1	TAS3A-5'D1[+]	243	5	0.399739	0.799517	no	ATSDC1	TAS3A-5'D1[+]:ATSDC1	0.999927
AT1G44170.3	TAS4-3'D9[+]	870	6	0.639583	1.06863	no	ALDH3H1	TAS4-3'D9[+]:ALDH3H1	0.999927
AT1G45000.2	TAS3C-5'D5[+]	1032	6	0.193045	0.584462	no	NA	TAS3C-5'D5[+]:AT1G45000.2	0.999927
AT1G48030.2	TAS1B-3'D5[+]	374	6	0.169646	0.634857	no	mtLPD1	TAS1B-3'D5[+]:mtLPD1	0.999927
AT1G48650.2	TAS2-3'D7[+]	1651	5	0.173545	0.993397	no	NA	TAS2-3'D7[+]:AT1G48650.2	0.999927
AT1G48920.1	TAS4-3'D9[+]	1286	6	1.09002	0.806596	no	ATNUC-L1	TAS4-3'D9[+]:ATNUC-L1	0.999927
AT1G50430.2	TAS3C-5'D2[-]	542	6	0.243744	0.828535	no	7RED	TAS3C-5'D2[-]:7RED	0.999927
AT1G50920.1	TAS4-3'D2[-]	1957	5	0.130647	0.570796	no	NA	TAS4-3'D2[-]:AT1G50920.1	0.999927
AT1G53165.3	TAS4-3'D9[+]	1890	5.5	0.187195	0.898205	no	ATMAP4K ALPHA1	TAS4-3'D9[+]:ATMAP4K ALPHA1	0.999927
AT1G53190.2	TAS3C-5'D9[+]	1675	6	0.107247	0.653558	no	NA	TAS3C-5'D9[+]:AT1G53190.2	0.999927
AT1G53910.3	TAS3C-5'D2[-]	1460	4.5	0.352941	0.915549	no	RAP2.12	TAS3C-5'D2[-]:RAP2.12	0.999927
AT1G53910.3	TAS3C-5'D9[+]	805	6	0.245694	0.548433	no	RAP2.12	TAS3C-5'D9[+]:RAP2.12	0.999927
AT1G54140.1	TAS3C-5'D3[+]	120	5.5	0.206695	0.846751	no	TAF9	TAS3C-5'D3[+]:TAF9	0.999927
AT1G55860.2	TAS1A-3'D5[+]	5353	5.5	0.155996	0.837533	no	UPL1	TAS1A-3'D5[+]:UPL1	0.999927
AT1G56050.1	TAS3B-5'D6[+]	802	4	0.113097	0.796326	no	NA	TAS3B-5'D6[+]:AT1G56050.1	0.999927
AT1G56070.1	TAS1C-3'D6[-]	2382	5	2.90542	0.563887	no	LOS1	TAS1C-3'D6[-]:LOS1	0.999927
AT1G56210.1	TAS3A-5'D2[-]	1142	5.5	0.140396	0.73211	no	NA	TAS3A-5'D2[-]:AT1G56210.1	0.999927
AT1G56280.2	TAS3B-5'D7[+]	853	5.5	0.869677	0.459028	no	ATDI19	TAS3B-5'D7[+]:ATDI19	0.999927
AT1G57720.2	TAS3B-5'D8[+]	1181	6	0.713681	0.520996	no	NA	TAS3B-5'D8[+]:AT1G57720.2	0.999927
AT1G59580.2	TAS1A-3'D7[-]	879	5.5	0.233994	0.949013	no	ATMPK2	TAS1A-3'D7[-]:ATMPK2	0.999927
AT1G59640.2	TAS3C-5'D3[+]	635	5.5	0.563535	0.767428	no	BPE	TAS3C-5'D3[+]:BPE	0.999927
AT1G60620.1	TAS1C-3'D5[-]	1229	6	0.224244	0.922154	no	ATRPAC43	TAS1C-3'D5[-]:ATRPAC43	0.999927
AT1G64230.5	TAS3C-5'D9[+]	777	6	0.163796	0.413654	no	UBC28	TAS3C-5'D9[+]:UBC28	0.999927
AT1G65060.2	TAS1C-3'D7[-]	1381	6	0.175495	0.437205	no	4CL3	TAS1C-3'D7[-]:4CL3	0.999927
AT1G65440.3	TAS1B-3'D4[-]	4568	5.5	0.185245	0.600132	no	GTB1	TAS1B-3'D4[-]:GTB1	0.999927
AT1G65960.2	TAS3B-5'D6[+]	1452	6	1.25577	0.664147	no	GAD2	TAS3B-5'D6[+]:GAD2	0.999927
AT1G66330.2	TAS1A-3'D3[-]	1374	6	0.522586	0.544958	no	NA	TAS1A-3'D3[-]:AT1G66330.2	0.999927
AT1G66350.1	TAS1C-3'D7[-]	1591	5	0.524536	0.904028	no	RGL	TAS1C-3'D7[-]:RGL	0.999927
AT1G66580.1	TAS3B-5'D7[-]	767	4	0.512837	0.542605	no	RPL10C	TAS3B-5'D7[-]:RPL10C	0.999927
AT1G67140.3	TAS2-3'D2[-]	1568	6	0.350991	0.976051	no	SWEETIE	TAS2-3'D2[-]:SWEETIE	0.999927
AT1G67480.2	TAS4-3'D3[-]	1281	5.5	0.130647	0.557623	no	NA	TAS4-3'D3[-]:AT1G67480.2	0.999927
AT1G70700.2	TAS1C-3'D5[-]	1014	6	0.916476	0.249145	no	JAZ9	TAS1C-3'D5[-]:JAZ9	0.999927
AT1G71070.1	TAS3C-5'D3[+]	1649	5	0.214494	0.861656	no	NA	TAS3C-5'D3[+]:AT1G71070.1	0.999927
AT1G71710.2	TAS1B-3'D4[-]	1847	5	0.194995	0.659079	no	NA	TAS1B-3'D4[-]:AT1G71710.2	0.999927
AT1G72030.1	TAS1B-3'D3[-]	471	5.5	0.228144	0.82891	no	NA	TAS1B-3'D3[-]:AT1G72030.1	0.999927
AT1G73760.1	TAS3A-5'D1[+]	1039	5	0.37049	0.793415	no	NA	TAS3A-5'D1[+]:AT1G73760.1	0.999927
AT1G74030.1	TAS3C-5'D4[+]	760	5	0.165746	0.843405	no	ENO1	TAS3C-5'D4[+]:ENO1	0.999927
AT1G74050.1	TAS4-3'D8[+]	822	4.5	0.506987	0.582464	no	NA	TAS4-3'D8[+]:AT1G74050.1	0.999927
AT1G74310.1	TAS4-3'D4[+]	2906	6	0.286642	0.744873	no	ATHSP101	TAS4-3'D4[+]:ATHSP101	0.999927
AT1G75270.1	TAS1C-3'D9[+]	199	6	0.218394	0.897964	no	DHAR2	TAS1C-3'D9[+]:DHAR2	0.999927
AT1G75920.4	TAS1C-3'D7[-]	965	5.5	0.489437	0.577859	no	NA	TAS1C-3'D7[-]:AT1G75920.4	0.999927
AT1G75930.1	TAS3A-5'D5[+]	662	4.5	0.680532	0.495639	no	EXL6	TAS3A-5'D5[+]:EXL6	0.999927
AT1G75940.1	TAS2-3'D3[+]	1613	6	0.181345	0.164234	no	ATA27	TAS2-3'D3[+]:ATA27	0.999927
AT1G75950.1	TAS4-3'D4[+]	215	6	0.335391	0.538886	no	ASK1	TAS4-3'D4[+]:ASK1	0.999927
AT1G76950.1	TAS1C-3'D7[+]	3817	6	0.202795	1.04048	no	PRAF1	TAS1C-3'D7[+]:PRAF1	0.999927
AT1G77520.1	TAS3B-5'D9[+]	1068	6	0.349041	0.81987	no	NA	TAS3B-5'D9[+]:AT1G77520.1	0.999927
AT1G77590.1	TAS2-3'D8[-]	1691	5.5	0.206695	0.40744	no	LACS9	TAS2-3'D8[-]:LACS9	0.999927
AT1G77720.1	TAS1B-3'D10[+]	1325	6	0.146246	0.96869	no	PPK1	TAS1B-3'D10[+]:PPK1	0.999927
AT1G77800.2	TAS3A-5'D1[+]	3908	6	0.327591	0.915304	no	NA	TAS3A-5'D1[+]:AT1G77800.2	0.999927
AT1G79060.1	TAS1A-3'D7[-]	1110	5.5	0.183295	0.778158	no	NA	TAS1A-3'D7[-]:AT1G79060.1	0.999927
AT1G79080.1	TAS3A-5'D1[+]	999	6	0.253493	0.867717	no	NA	TAS3A-5'D1[+]:AT1G79080.1	0.999927
AT1G79830.4	TAS1C-3'D7[-]	1182	5.5	0.253493	0.945575	no	GC5	TAS1C-3'D7[-]:GC5	0.999927
AT1G80360.1	TAS3C-5'D8[-]	1277	5.5	0.228144	0.687716	no	NA	TAS3C-5'D8[-]:AT1G80360.1	0.999927
AT1G80460.2	TAS3A-5'D9[-]	1087	5.5	0.132597	0.572909	no	GLI1	TAS3A-5'D9[-]:GLI1	0.999927
AT1G80600.1	TAS3C-5'D4[+]	675	6	0.126747	0.733447	no	WIN1	TAS3C-5'D4[+]:WIN1	0.999927
AT2G01070.2	TAS3B-5'D7[+]	1678	4.5	0.177445	0.691017	no	NA	TAS3B-5'D7[+]:AT2G01070.2	0.999927
AT2G01350.4	TAS1A-3'D7[-]	944	5	0.157946	0.527461	no	QPT	TAS1A-3'D7[-]:QPT	0.999927
AT2G01710.1	TAS4-3'D6[-]	535	5	0.415339	0.967993	no	NA	TAS4-3'D6[-]:AT2G01710.1	0.999927
AT2G01820.1	TAS3A-5'D6[+]	596	6	0.249593	1.04399	no	NA	TAS3A-5'D6[+]:AT2G01820.1	0.999927
AT2G01970.1	TAS1B-3'D2[-]	1507	4	0.181345	0.512187	no	NA	TAS1B-3'D2[-]:AT2G01970.1	0.999927
AT2G03680.2	TAS4-3'D2[-]	310	5.5	0.534286	0.624059	no	SKU6	TAS4-3'D2[-]:SKU6	0.999927
AT2G03740.1	TAS3B-5'D1[+]	301	5.5	0.148196	0.285173	no	NA	TAS3B-5'D1[+]:AT2G03740.1	0.999927
AT2G04030.2	TAS1B-3'D10[+]	1259	6	0.278843	0.672765	no	AtHsp90.5	TAS1B-3'D10[+]:AtHsp90.5	0.999927
AT2G04630.1	TAS3C-5'D3[+]	171	6	0.173545	0.627019	no	NRPB6B	TAS3C-5'D3[+]:NRPB6B	0.999927
AT2G06005.2	TAS1A-3'D9[-]	925	6	0.152096	0.730476	no	FIP1	TAS1A-3'D9[-]:FIP1	0.999927
AT2G07180.2	TAS3B-5'D7[+]	1346	6	0.216444	0.872697	no	NA	TAS3B-5'D7[+]:AT2G07180.2	0.999927
AT2G07718.1	TAS4-3'D3[+]	811	5	0.0779979	0.267349	no	NA	TAS4-3'D3[+]:AT2G07718.1	0.999927
AT2G07771.2	TAS3A-5'D4[-]	658	5	0.0643483	1.06435	no	ABCI5	TAS3A-5'D4[-]:ABCI5	0.999927
AT2G13370.1	TAS1A-3'D3[-]	3780	6	0.222294	1.22229	no	CHR5	TAS1A-3'D3[-]:CHR5	0.999927
AT2G14835.2	TAS1C-3'D9[+]	1459	6	0.144296	0.788931	no	NA	TAS1C-3'D9[+]:AT2G14835.2	0.999927
AT2G16770.1	TAS3B-5'D8[+]	694	5	0.169646	0.930215	no	bZIP23	TAS3B-5'D8[+]:bZIP23	0.999927
AT2G18020.1	TAS3C-5'D10[-]	425	6	0.980824	0.389084	no	EMB2296	TAS3C-5'D10[-]:EMB2296	0.999927
AT2G19110.1	TAS3C-5'D9[+]	3121	6	0.157946	0.589803	no	ATHMA4	TAS3C-5'D9[+]:ATHMA4	0.999927
AT2G19480.3	TAS3A-5'D1[+]	1195	5.5	0.150146	0.473066	no	NAP1;2	TAS3A-5'D1[+]:NAP1;2	0.999927
AT2G19760.1	TAS2-3'D3[-]	645	4	0.155996	0.865661	no	PFN1	TAS2-3'D3[-]:PFN1	0.999927
AT2G20120.1	TAS2-3'D3[+]	656	5.5	0.432889	0.813019	no	COV1	TAS2-3'D3[+]:COV1	0.999927
AT2G20130.1	TAS2-3'D3[+]	657	5.5	0.0955475	0.857979	no	LCV1	TAS2-3'D3[+]:LCV1	0.999927
AT2G21120.1	TAS3C-5'D2[-]	1453	5	0.103347	0.649015	no	NA	TAS3C-5'D2[-]:AT2G21120.1	0.999927
AT2G21270.3	TAS4-3'D5[+]	345	5.5	0.183295	0.832609	no	UFD1	TAS4-3'D5[+]:UFD1	0.999927
AT2G21440.1	TAS1C-3'D5[-]	1530	6	0.419239	1.15743	no	NA	TAS1C-3'D5[-]:AT2G21440.1	0.999927
AT2G21660.2	TAS4-3'D2[-]	542	5.5	0.614234	0.506993	no	ATGRP7	TAS4-3'D2[-]:ATGRP7	0.999927
AT2G22795.1	TAS3B-5'D9[+]	1697	5.5	0.115047	0.505227	no	NA	TAS3B-5'D9[+]:AT2G22795.1	0.999927
AT2G25210.1	TAS3C-5'D4[-]	298	4	0.462138	0.665434	no	NA	TAS3C-5'D4[-]:AT2G25210.1	0.999927
AT2G26410.1	TAS1A-3'D9[-]	928	5.5	0.157946	0.939858	no	Iqd4	TAS1A-3'D9[-]:Iqd4	0.999927
AT2G26850.1	TAS3A-5'D6[+]	626	6	0.189145	0.881474	no	NA	TAS3A-5'D6[+]:AT2G26850.1	0.999927
AT2G26860.2	TAS3B-5'D7[+]	1312	5	0.171595	0.583429	no	NA	TAS3B-5'D7[+]:AT2G26860.2	0.999927
AT2G27510.1	TAS3B-5'D8[+]	266	6	0.161846	0.449742	no	ATFD3	TAS3B-5'D8[+]:ATFD3	0.999927
AT2G28790.1	TAS4-3'D2[+]	381	6	0.542086	0.693206	no	NA	TAS4-3'D2[+]:AT2G28790.1	0.999927
AT2G28910.1	TAS3B-5'D7[+]	560	5.5	0.740981	0.817738	no	CXIP4	TAS3B-5'D7[+]:CXIP4	0.999927
AT2G30110.1	TAS4-3'D2[-]	3130	6	0.148196	0.531998	no	ATUBA1	TAS4-3'D2[-]:ATUBA1	0.999927
AT2G30520.3	TAS1A-3'D10[-]	1670	5.5	0.243744	0.43395	no	RPT2	TAS1A-3'D10[-]:RPT2	0.999927
AT2G30570.1	TAS3B-5'D7[+]	263	6	2.10009	0.112365	no	PSBW	TAS3B-5'D7[+]:PSBW	0.999927
AT2G31410.1	TAS3B-5'D7[+]	458	4.5	0.224244	0.581956	no	NA	TAS3B-5'D7[+]:AT2G31410.1	0.999927
AT2G31650.1	TAS1C-3'D4[+]	2274	5.5	0.116997	0.982843	no	ATX1	TAS1C-3'D4[+]:ATX1	0.999927
AT2G33150.1	TAS3B-5'D7[-]	1589	5	0.516736	0.618884	no	KAT2	TAS3B-5'D7[-]:KAT2	0.999927
AT2G33860.1	TAS2-3'D9[-]	1723	5	0.335391	0.82826	no	ARF3	TAS2-3'D9[-]:ARF3	0.999927
AT2G35260.1	TAS3C-5'D3[+]	1038	6	0.349041	0.541412	no	NA	TAS3C-5'D3[+]:AT2G35260.1	0.999927
AT2G37340.3	TAS4-3'D5[+]	442	6	0.140396	0.346911	no	AT-RS2Z33	TAS4-3'D5[+]:AT-RS2Z33	0.999927
AT2G37340.3	TAS3B-5'D7[+]	860	6	0.413389	0.560222	no	AT-RS2Z33	TAS3B-5'D7[+]:AT-RS2Z33	0.999927
AT2G37940.1	TAS3C-5'D6[+]	452	5	0.233994	0.98906	no	AtIPCS2	TAS3C-5'D6[+]:AtIPCS2	0.999927
AT2G38025.1	TAS1B-3'D7[-]	295	5.5	0.175495	0.803956	no	NA	TAS1B-3'D7[-]:AT2G38025.1	0.999927
AT2G39800.4	TAS1C-3'D7[-]	2235	5	0.107247	0.451438	no	ATP5CS	TAS1C-3'D7[-]:ATP5CS	0.999927
AT2G40000.1	TAS3C-5'D3[+]	471	6	0.243744	0.704918	no	ATHSPRO2	TAS3C-5'D3[+]:ATHSPRO2	0.999927
AT2G40205.1	TAS3B-5'D9[-]	105	4	0.77218	0.458121	no	NA	TAS3B-5'D9[-]:AT2G40205.1	0.999927
AT2G41790.1	TAS3B-5'D2[+]	2827	4	0.193045	0.158144	no	NA	TAS3B-5'D2[+]:AT2G41790.1	0.999927
AT2G41905.1	TAS4-3'D9[+]	92	6	1.02177	0.364333	no	NA	TAS4-3'D9[+]:AT2G41905.1	0.999927
AT2G42600.2	TAS2-3'D9[+]	2642	6	0.38999	0.651089	no	ATPPC2	TAS2-3'D9[+]:ATPPC2	0.999927
AT2G45520.1	TAS1A-3'D9[-]	387	5.5	0.460188	0.727849	no	NA	TAS1A-3'D9[-]:AT2G45520.1	0.999927
AT2G46000.1	TAS3B-5'D6[+]	717	5	0.187195	0.746272	no	NA	TAS3B-5'D6[+]:AT2G46000.1	0.999927
AT2G46820.2	TAS3B-5'D9[-]	803	4.5	0.165746	0.516338	no	PSAP	TAS3B-5'D9[-]:PSAP	0.999927
AT2G47240.2	TAS1B-3'D3[+]	1187	5.5	0.239844	0.608551	no	CER8	TAS1B-3'D3[+]:CER8	0.999927
AT3G02080.1	TAS1C-3'D7[-]	447	5	1.50926	0.760165	no	NA	TAS1C-3'D7[-]:AT3G02080.1	0.999927
AT3G02200.2	TAS3C-5'D4[+]	1119	6	0.329541	0.476529	no	NA	TAS3C-5'D4[+]:AT3G02200.2	0.999927
AT3G02230.1	TAS3A-5'D4[-]	1223	3.5	0.37244	0.384224	no	ATRGP1	TAS3A-5'D4[-]:ATRGP1	0.999927
AT3G02540.3	TAS1A-3'D9[-]	1330	5.5	0.614234	0.551583	no	RAD23-3	TAS1A-3'D9[-]:RAD23-3	0.999927
AT3G02630.1	TAS3C-5'D2[-]	1440	5	0.401689	0.961221	no	NA	TAS3C-5'D2[-]:AT3G02630.1	0.999927
AT3G02760.1	TAS3B-5'D6[+]	522	5.5	0.196945	0.581925	no	NA	TAS3B-5'D6[+]:AT3G02760.1	0.999927
AT3G02760.1	TAS1B-3'D7[-]	796	6	0.434839	0.866876	no	NA	TAS1B-3'D7[-]:AT3G02760.1	0.999927
AT3G03970.3	TAS2-3'D3[+]	2419	6	0.337341	1.15493	no	NA	TAS2-3'D3[+]:AT3G03970.3	0.999927
AT3G04920.1	TAS3A-5'D8[+]	255	5	0.38024	0.407074	no	NA	TAS3A-5'D8[+]:AT3G04920.1	0.999927
AT3G05020.1	TAS3C-5'D3[+]	258	5.5	2.41794	0.826484	no	ACP	TAS3C-5'D3[+]:ACP	0.999927
AT3G06010.1	TAS3A-5'D1[+]	2965	5	0.169646	0.836782	no	ATCHR12	TAS3A-5'D1[+]:ATCHR12	0.999927
AT3G06350.1	TAS3B-5'D7[+]	1744	5.5	0.809229	0.87628	no	EMB3004	TAS3B-5'D7[+]:EMB3004	0.999927
AT3G08580.2	TAS3C-5'D9[-]	588	6	1.30062	0.367913	no	AAC1	TAS3C-5'D9[-]:AAC1	0.999927
AT3G09670.2	TAS4-3'D8[-]	2099	5	0.261293	0.766542	no	NA	TAS4-3'D8[-]:AT3G09670.2	0.999927
AT3G09740.1	TAS3C-5'D4[-]	938	4.5	0.39389	0.574703	no	ATSYP71	TAS3C-5'D4[-]:ATSYP71	0.999927
AT3G09860.1	TAS3A-5'D4[-]	455	4	0.179395	0.71592	no	NA	TAS3A-5'D4[-]:AT3G09860.1	0.999927
AT3G09980.1	TAS1B-3'D9[-]	260	5.5	0.551835	0.800771	no	NA	TAS1B-3'D9[-]:AT3G09980.1	0.999927
AT3G10230.2	TAS1A-3'D7[-]	904	6	0.107247	0.709053	no	AtLCY	TAS1A-3'D7[-]:AtLCY	0.999927
AT3G10570.1	TAS4-3'D9[+]	1554	6	0.253493	0.304684	no	CYP77A6	TAS4-3'D9[+]:CYP77A6	0.999927
AT3G11510.1	TAS4-3'D9[+]	685	5.5	0.333441	0.50623	no	NA	TAS4-3'D9[+]:AT3G11510.1	0.999927
AT3G11690.1	TAS3A-5'D1[+]	1196	6	0.159896	0.866052	no	NA	TAS3A-5'D1[+]:AT3G11690.1	0.999927
AT3G11980.1	TAS3B-5'D7[+]	1817	5.5	0.399739	0.701123	no	FAR2	TAS3B-5'D7[+]:FAR2	0.999927
AT3G12260.1	TAS3A-5'D4[-]	259	6	0.672732	0.535199	no	NA	TAS3A-5'D4[-]:AT3G12260.1	0.999927
AT3G12480.1	TAS3A-5'D1[+]	1140	5.5	0.148196	0.780084	no	NF-YC11	TAS3A-5'D1[+]:NF-YC11	0.999927
AT3G13000.2	TAS1C-3'D6[-]	2259	6	0.212544	0.958387	no	NA	TAS1C-3'D6[-]:AT3G13000.2	0.999927
AT3G14870.3	TAS1C-3'D7[-]	138	5	0.113097	0.745376	no	NA	TAS1C-3'D7[-]:AT3G14870.3	0.999927
AT3G15530.2	TAS4-3'D4[-]	423	5.5	0.405589	0.958767	no	NA	TAS4-3'D4[-]:AT3G15530.2	0.999927
AT3G16630.2	TAS1C-3'D7[-]	2545	5.5	0.146246	0.564231	no	ATKINESIN-13A	TAS1C-3'D7[-]:ATKINESIN-13A	0.999927
AT3G16857.2	TAS3A-5'D1[+]	949	4.5	0.255443	1.00625	no	ARR1	TAS3A-5'D1[+]:ARR1	0.999927
AT3G18820.1	TAS3A-5'D4[-]	175	6	0.177445	0.434777	no	ATRAB7B	TAS3A-5'D4[-]:ATRAB7B	0.999927
AT3G19340.1	TAS1B-3'D10[+]	620	5.5	0.148196	0.738041	no	NA	TAS1B-3'D10[+]:AT3G19340.1	0.999927
AT3G21400.1	TAS3C-5'D10[+]	391	5	0.134546	0.896737	no	NA	TAS3C-5'D10[+]:AT3G21400.1	0.999927
AT3G21865.1	TAS3C-5'D10[+]	489	6	0.598634	0.854141	no	PEX22	TAS3C-5'D10[+]:PEX22	0.999927
AT3G22190.2	TAS3C-5'D8[-]	1692	5.5	0.450438	1.02763	no	IQD5	TAS3C-5'D8[-]:IQD5	0.999927
AT3G22320.1	TAS3B-5'D2[+]	823	5.5	0.179395	0.762876	no	ATRPABC24.3	TAS3B-5'D2[+]:ATRPABC24.3	0.999927
AT3G22880.1	TAS3A-5'D2[+]	1108	5	0.124797	0.783919	no	ARLIM15	TAS3A-5'D2[+]:ARLIM15	0.999927
AT3G24080.2	TAS3C-5'D3[+]	388	5.5	0.971074	0.728352	no	NA	TAS3C-5'D3[+]:AT3G24080.2	0.999927
AT3G24100.1	TAS3C-5'D2[+]	156	6	0.567435	0.675016	no	NA	TAS3C-5'D2[+]:AT3G24100.1	0.999927
AT3G25290.2	TAS4-3'D2[-]	334	4	0.130647	0.691238	no	NA	TAS4-3'D2[-]:AT3G25290.2	0.999927
AT3G26300.1	TAS3A-5'D8[+]	306	6	0.0779979	0.831537	no	CYP71B34	TAS3A-5'D8[+]:CYP71B34	0.999927
AT3G27060.1	TAS1C-3'D9[-]	516	6	0.214494	0.633068	no	ATTSO2	TAS1C-3'D9[-]:ATTSO2	0.999927
AT3G28730.1	TAS3C-5'D3[+]	1610	5.5	0.239844	0.707399	no	ATHMG	TAS3C-5'D3[+]:ATHMG	0.999927
AT3G28830.1	TAS3C-5'D4[+]	489	4.5	0.163796	0.604797	no	NA	TAS3C-5'D4[+]:AT3G28830.1	0.999927
AT3G30841.1	TAS3C-5'D6[-]	163	6	0.290542	1.05752	no	NA	TAS3C-5'D6[-]:AT3G30841.1	0.999927
AT3G44600.1	TAS3A-5'D9[+]	1200	6	0.230094	0.897558	no	AtCYP71	TAS3A-5'D9[+]:AtCYP71	0.999927
AT3G44620.2	TAS3B-5'D5[+]	441	5	0.228144	0.717487	no	NA	TAS3B-5'D5[+]:AT3G44620.2	0.999927
AT3G46430.1	TAS3C-5'D3[+]	86	6	0.481637	0.598373	no	NA	TAS3C-5'D3[+]:AT3G46430.1	0.999927
AT3G47300.1	TAS1B-3'D7[-]	619	5	0.272993	0.942266	no	SELT	TAS1B-3'D7[-]:SELT	0.999927
AT3G47470.1	TAS4-3'D4[-]	291	5.5	1.51121	0.295183	no	CAB4	TAS4-3'D4[-]:CAB4	0.999927
AT3G47890.1	TAS3A-5'D2[+]	2943	5.5	0.167696	0.788112	no	NA	TAS3A-5'D2[+]:AT3G47890.1	0.999927
AT3G48570.1	TAS1A-3'D8[-]	194	4.5	0.191095	0.70712	no	NA	TAS1A-3'D8[-]:AT3G48570.1	0.999927
AT3G49000.1	TAS3B-5'D9[+]	1689	5.5	0.128697	0.963385	no	NA	TAS3B-5'D9[+]:AT3G49000.1	0.999927
AT3G49800.1	TAS2-3'D1[-]	1202	4	0.0955475	0.784866	no	NA	TAS2-3'D1[-]:AT3G49800.1	0.999927
AT3G50670.2	TAS4-3'D9[+]	1708	6	0.142346	0.651047	no	U1-70K	TAS4-3'D9[+]:U1-70K	0.999927
AT3G52300.2	TAS3B-5'D5[+]	377	6	1.27137	0.686476	no	ATPQ	TAS3B-5'D5[+]:ATPQ	0.999927
AT3G53500.2	TAS3B-5'D7[+]	732	4	0.620084	0.952973	no	At-RS2Z	TAS3B-5'D7[+]:At-RS2Z	0.999927
AT3G53540.1	TAS1C-3'D6[-]	2180	5.5	0.179395	0.930751	no	TRM19	TAS1C-3'D6[-]:TRM19	0.999927
AT3G53750.1	TAS3B-5'D7[-]	1371	4.5	0.179395	0.402998	no	ACT3	TAS3B-5'D7[-]:ACT3	0.999927
AT3G54080.1	TAS1A-3'D10[-]	1213	5	0.122847	0.588286	no	NA	TAS1A-3'D10[-]:AT3G54080.1	0.999927
AT3G54340.1	TAS2-3'D3[+]	496	4.5	0.154046	0.279057	no	AP3	TAS2-3'D3[+]:AP3	0.999927
AT3G54390.1	TAS3C-5'D3[+]	909	6	0.159896	0.761793	no	NA	TAS3C-5'D3[+]:AT3G54390.1	0.999927
AT3G54760.2	TAS3A-5'D2[+]	2594	5	0.136496	0.649879	no	NA	TAS3A-5'D2[+]:AT3G54760.2	0.999927
AT3G55430.1	TAS4-3'D6[+]	568	6	0.152096	0.570395	no	NA	TAS4-3'D6[+]:AT3G55430.1	0.999927
AT3G55510.1	TAS2-3'D9[+]	1915	5	0.132597	0.748658	no	RBL	TAS2-3'D9[+]:RBL	0.999927
AT3G55610.2	TAS3C-5'D4[+]	1851	6	0.148196	0.772916	no	P5CS2	TAS3C-5'D4[+]:P5CS2	0.999927
AT3G55920.1	TAS3A-5'D1[+]	440	6	0.206695	0.547721	no	NA	TAS3A-5'D1[+]:AT3G55920.1	0.999927
AT3G56150.2	TAS3C-5'D10[+]	271	6	0.167696	0.651733	no	ATEIF3C-1	TAS3C-5'D10[+]:ATEIF3C-1	0.999927
AT3G57000.1	TAS1C-3'D10[+]	307	6	0.118947	0.748316	no	NA	TAS1C-3'D10[+]:AT3G57000.1	0.999927
AT3G57710.1	TAS1C-3'D10[-]	632	6	0.251543	0.945495	no	NA	TAS1C-3'D10[-]:AT3G57710.1	0.999927
AT3G58650.1	TAS3A-5'D1[+]	2946	6	0.118947	0.894054	no	TRM7	TAS3A-5'D1[+]:TRM7	0.999927
AT3G59940.1	TAS4-3'D9[+]	1241	6	0.175495	0.738013	no	NA	TAS4-3'D9[+]:AT3G59940.1	0.999927
AT3G59940.1	TAS3A-5'D2[-]	1325	6	0.542086	1	no	NA	TAS3A-5'D2[-]:AT3G59940.1	0.999927
AT3G60750.2	TAS3B-5'D7[+]	2144	5.5	0.990574	0.503908	no	NA	TAS3B-5'D7[+]:AT3G60750.2	0.999927
AT3G60910.1	TAS1A-3'D8[-]	784	4	0.489437	0.856475	no	NA	TAS1A-3'D8[-]:AT3G60910.1	0.999927
AT3G61260.1	TAS3B-5'D7[+]	609	4.5	0.142346	0.486641	no	NA	TAS3B-5'D7[+]:AT3G61260.1	0.999927
AT3G61380.1	TAS3C-5'D3[+]	896	6	0.191095	0.977594	no	TRM14	TAS3C-5'D3[+]:TRM14	0.999927
AT3G63500.2	TAS3C-5'D3[+]	3409	5.5	0.39779	0.972857	no	TTA2	TAS3C-5'D3[+]:TTA2	0.999927
AT4G00830.4	TAS3C-5'D3[+]	475	5.5	0.196945	0.749644	no	LIF2	TAS3C-5'D3[+]:LIF2	0.999927
AT4G01810.1	TAS3C-5'D8[-]	2791	5.5	0.345141	0.830291	no	NA	TAS3C-5'D8[-]:AT4G01810.1	0.999927
AT4G02200.3	TAS3B-5'D7[+]	693	4.5	0.347091	0.810045	no	NA	TAS3B-5'D7[+]:AT4G02200.3	0.999927
AT4G02530.1	TAS3B-5'D9[+]	298	6	0.614234	0.808563	no	NA	TAS3B-5'D9[+]:AT4G02530.1	0.999927
AT4G03260.2	TAS3C-5'D2[-]	2464	6	0.243744	0.912712	no	NA	TAS3C-5'D2[-]:AT4G03260.2	0.999927
AT4G04960.1	TAS2-3'D10[+]	1683	6	0.230094	0.652474	no	NA	TAS2-3'D10[+]:AT4G04960.1	0.999927
AT4G06634.3	TAS3B-5'D7[+]	1193	5.5	0.130647	0.814564	no	AtYY1	TAS3B-5'D7[+]:AtYY1	0.999927
AT4G11560.1	TAS1A-3'D7[-]	1693	6	0.150146	0.488746	no	NA	TAS1A-3'D7[-]:AT4G11560.1	0.999927
AT4G12420.2	TAS3B-5'D7[+]	1677	4.5	0.251543	0.726193	no	SKU5	TAS3B-5'D7[+]:SKU5	0.999927
AT4G12960.2	TAS3C-5'D4[+]	304	6	0.284693	0.70855	no	AtGILT	TAS3C-5'D4[+]:AtGILT	0.999927
AT4G14500.2	TAS3C-5'D4[+]	1366	5	0.157946	0.70962	no	NA	TAS3C-5'D4[+]:AT4G14500.2	0.999927
AT4G14690.1	TAS4-3'D4[-]	265	5.5	0.454338	0.692618	no	ELIP2	TAS4-3'D4[-]:ELIP2	0.999927
AT4G14990.1	TAS3A-5'D6[+]	2970	5	0.157946	0.627842	no	NA	TAS3A-5'D6[+]:AT4G14990.1	0.999927
AT4G15420.1	TAS3B-5'D6[+]	319	4	0.226194	0.907626	no	NA	TAS3B-5'D6[+]:AT4G15420.1	0.999927
AT4G15540.1	TAS3C-5'D5[+]	244	6	0.0916476	0.770236	no	UMAMIT38	TAS3C-5'D5[+]:UMAMIT38	0.999927
AT4G16430.1	TAS2-3'D2[+]	1104	5	0.163796	0.557355	no	NA	TAS2-3'D2[+]:AT4G16430.1	0.999927
AT4G16710.2	TAS1A-3'D9[-]	508	5.5	0.228144	0.996835	no	NA	TAS1A-3'D9[-]:AT4G16710.2	0.999927
AT4G16780.1	TAS1A-3'D9[-]	644	4.5	0.432889	0.939885	no	ATHB-2	TAS1A-3'D9[-]:ATHB-2	0.999927
AT4G17870.1	TAS3C-5'D4[+]	145	6	0.302242	0.881241	no	PYR1	TAS3C-5'D4[+]:PYR1	0.999927
AT4G18480.1	TAS3B-5'D3[+]	949	4.5	0.37829	0.238085	no	CH-42	TAS3B-5'D3[+]:CH-42	0.999927
AT4G19490.2	TAS4-3'D7[-]	2590	5	0.177445	0.892144	no	ATVPS54	TAS4-3'D7[-]:ATVPS54	0.999927
AT4G20720.1	TAS3B-5'D6[+]	417	5.5	0.0311992	0.905795	no	NA	TAS3B-5'D6[+]:AT4G20720.1	0.999927
AT4G21550.1	TAS1C-3'D1[-]	2172	6	0.265193	0.829887	no	VAL3	TAS1C-3'D1[-]:VAL3	0.999927
AT4G21660.2	TAS3B-5'D7[+]	1739	6	0.347091	0.680736	no	NA	TAS3B-5'D7[+]:AT4G21660.2	0.999927
AT4G22220.1	TAS3C-5'D3[+]	643	5.5	0.179395	0.412621	no	ATISU1	TAS3C-5'D3[+]:ATISU1	0.999927
AT4G24290.2	TAS3C-5'D3[+]	2072	5	0.138446	0.890216	no	NA	TAS3C-5'D3[+]:AT4G24290.2	0.999927
AT4G25080.5	TAS1A-3'D9[-]	1012	5	0.690282	0.693006	no	CHLM	TAS1A-3'D9[-]:CHLM	0.999927
AT4G25320.1	TAS3A-5'D1[+]	1527	4.5	0.150146	0.775247	no	NA	TAS3A-5'D1[+]:AT4G25320.1	0.999927
AT4G25370.1	TAS3B-5'D10[+]	775	5	0.150146	0.539235	no	NA	TAS3B-5'D10[+]:AT4G25370.1	0.999927
AT4G25730.1	TAS3B-5'D7[+]	2386	6	0.116997	0.756882	no	NA	TAS3B-5'D7[+]:AT4G25730.1	0.999927
AT4G26630.2	TAS3C-5'D3[+]	836	6	0.142346	0.57444	no	NA	TAS3C-5'D3[+]:AT4G26630.2	0.999927
AT4G26630.2	TAS3B-5'D9[+]	969	6	0.409489	0.430301	no	NA	TAS3B-5'D9[+]:AT4G26630.2	0.999927
AT4G27180.1	TAS3C-5'D8[-]	169	5.5	0.154046	0.648348	no	ATK2	TAS3C-5'D8[-]:ATK2	0.999927
AT4G27760.1	TAS1C-3'D7[-]	722	4	0.189145	0.890485	no	FEY	TAS1C-3'D7[-]:FEY	0.999927
AT4G28300.2	TAS2-3'D1[-]	2051	6	0.226194	0.586143	no	NA	TAS2-3'D1[-]:AT4G28300.2	0.999927
AT4G28310.1	TAS3C-5'D9[+]	560	6	0.130647	0.705537	no	NA	TAS3C-5'D9[+]:AT4G28310.1	0.999927
AT4G28750.1	TAS3A-5'D7[+]	329	6	0.128697	0.084975	no	PSAE-1	TAS3A-5'D7[+]:PSAE-1	0.999927
AT4G29060.2	TAS4-3'D4[+]	1144	6	0.146246	0.868505	no	emb2726	TAS4-3'D4[+]:emb2726	0.999927
AT4G29210.2	TAS3A-5'D9[+]	1707	6	0.185245	0.74964	no	GGT3	TAS3A-5'D9[+]:GGT3	0.999927
AT4G29480.1	TAS2-3'D3[+]	150	6	0.331491	0.567217	no	NA	TAS2-3'D3[+]:AT4G29480.1	0.999927
AT4G29940.2	TAS3A-5'D6[+]	1298	4	0.159896	0.956581	no	PRHA	TAS3A-5'D6[+]:PRHA	0.999927
AT4G30060.1	TAS3A-5'D4[-]	1670	4.5	0.450438	0.923061	no	NA	TAS3A-5'D4[-]:AT4G30060.1	0.999927
AT4G30440.1	TAS3B-5'D3[+]	1118	5.5	0.235944	0.556564	no	GAE1	TAS3B-5'D3[+]:GAE1	0.999927
AT4G30940.1	TAS3B-5'D7[+]	1217	5.5	0.187195	1.02182	no	NA	TAS3B-5'D7[+]:AT4G30940.1	0.999927
AT4G31300.3	TAS3B-5'D1[+]	411	5	0.489437	0.818832	no	PBA1	TAS3B-5'D1[+]:PBA1	0.999927
AT4G31340.2	TAS1C-3'D7[+]	1503	6	0.343191	0.51994	no	NA	TAS1C-3'D7[+]:AT4G31340.2	0.999927
AT4G31340.2	TAS3C-5'D4[-]	1692	2	0.113097	0.585571	no	NA	TAS3C-5'D4[-]:AT4G31340.2	0.999927
AT4G32410.1	TAS1B-3'D4[-]	3035	6	0.189145	0.611771	no	AtCESA1	TAS1B-3'D4[-]:AtCESA1	0.999927
AT4G32920.3	TAS3B-5'D3[+]	3825	6	0.134546	0.832578	no	NA	TAS3B-5'D3[+]:AT4G32920.3	0.999927
AT4G33080.2	TAS1C-3'D2[-]	339	6	0.267143	0.971592	no	NA	TAS1C-3'D2[-]:AT4G33080.2	0.999927
AT4G33150.3	TAS3C-5'D3[+]	1710	6	0.337341	0.321711	no	LKR	TAS3C-5'D3[+]:LKR	0.999927
AT4G33690.1	TAS3B-5'D5[+]	174	5	0.403639	0.970344	no	NA	TAS3B-5'D5[+]:AT4G33690.1	0.999927
AT4G33920.1	TAS3C-5'D3[+]	1160	6	0.308092	0.740571	no	NA	TAS3C-5'D3[+]:AT4G33920.1	0.999927
AT4G34215.2	TAS3B-5'D7[+]	539	6	0.171595	0.616978	no	NA	TAS3B-5'D7[+]:AT4G34215.2	0.999927
AT4G34340.1	TAS3B-5'D2[+]	736	5.5	0.341241	1.09731	no	TAF8	TAS3B-5'D2[+]:TAF8	0.999927
AT4G34480.1	TAS3A-5'D1[+]	1379	6	0.196945	0.719758	no	NA	TAS3A-5'D1[+]:AT4G34480.1	0.999927
AT4G34480.1	TAS3C-5'D1[+]	1447	6	0.499187	0.822429	no	NA	TAS3C-5'D1[+]:AT4G34480.1	0.999927
AT4G35110.4	TAS1B-3'D4[-]	1131	5.5	0.36854	0.818147	no	NA	TAS1B-3'D4[-]:AT4G35110.4	0.999927
AT4G35550.1	TAS3B-5'D6[+]	730	6	0.715631	0.970226	no	ATWOX13	TAS3B-5'D6[+]:ATWOX13	0.999927
AT4G36050.2	TAS1B-3'D10[+]	2096	5.5	0.159896	0.983467	no	NA	TAS1B-3'D10[+]:AT4G36050.2	0.999927
AT4G36240.1	TAS3B-5'D7[+]	438	5.5	0.210594	0.91998	no	GATA7	TAS3B-5'D7[+]:GATA7	0.999927
AT4G36980.4	TAS3B-5'D9[+]	860	6	0.440688	0.941389	no	NA	TAS3B-5'D9[+]:AT4G36980.4	0.999927
AT4G37980.2	TAS1B-3'D9[+]	680	4.5	0.249593	0.556842	no	ATCAD7	TAS1B-3'D9[+]:ATCAD7	0.999927
AT4G39040.2	TAS3C-5'D3[+]	330	5.5	0.196945	0.700057	no	NA	TAS3C-5'D3[+]:AT4G39040.2	0.999927
AT4G39480.1	TAS3A-5'D4[-]	1539	6	0.442638	0.483604	no	CYP96A9	TAS3A-5'D4[-]:CYP96A9	0.999927
AT4G39820.1	TAS3B-5'D3[+]	1312	6	0.505037	0.866417	no	NA	TAS3B-5'D3[+]:AT4G39820.1	0.999927
AT4G40030.3	TAS3C-5'D9[-]	826	5	0.655183	0.297749	no	NA	TAS3C-5'D9[-]:AT4G40030.3	0.999927
AT5G01090.1	TAS3C-5'D8[-]	1277	5	0.245694	0.63958	no	NA	TAS3C-5'D8[-]:AT5G01090.1	0.999927
AT5G01220.1	TAS1A-3'D9[-]	1449	5.5	0.208645	0.743354	no	SQD2	TAS1A-3'D9[-]:SQD2	0.999927
AT5G01410.1	TAS1C-3'D7[-]	1134	4.5	0.571335	0.489621	no	ATPDX1	TAS1C-3'D7[-]:ATPDX1	0.999927
AT5G01410.1	TAS4-3'D6[+]	694	6	0.684432	0.464968	no	ATPDX1	TAS4-3'D6[+]:ATPDX1	0.999927
AT5G01820.1	TAS1A-3'D7[-]	1309	5.5	0.452388	0.86025	no	ATCIPK14	TAS1A-3'D7[-]:ATCIPK14	0.999927
AT5G02940.1	TAS3B-5'D7[+]	1799	5.5	0.159896	0.733608	no	NA	TAS3B-5'D7[+]:AT5G02940.1	0.999927
AT5G03870.1	TAS3B-5'D6[+]	366	6	0.154046	0.83612	no	NA	TAS3B-5'D6[+]:AT5G03870.1	0.999927
AT5G04180.1	TAS1A-3'D3[-]	626	5	0.265193	0.578885	no	ACA3	TAS1A-3'D3[-]:ACA3	0.999927
AT5G04600.1	TAS3B-5'D9[+]	623	5.5	0.136496	0.541751	no	NA	TAS3B-5'D9[+]:AT5G04600.1	0.999927
AT5G07030.1	TAS1A-3'D2[+]	965	4	0.581085	0.568674	no	NA	TAS1A-3'D2[+]:AT5G07030.1	0.999927
AT5G07180.1	TAS3B-5'D1[+]	3246	6	0.171595	0.923175	no	ERL2	TAS3B-5'D1[+]:ERL2	0.999927
AT5G07530.2	TAS3B-5'D6[+]	635	5.5	9.11406	0.00787117	no	ATGRP-7	TAS3B-5'D6[+]:ATGRP-7	0.999927
AT5G08680.1	TAS2-3'D10[+]	289	5.5	0.181345	0.749021	no	NA	TAS2-3'D10[+]:AT5G08680.1	0.999927
AT5G09810.1	TAS1C-3'D5[+]	1319	5.5	0.74293	0.320046	no	ACT7	TAS1C-3'D5[+]:ACT7	0.999927
AT5G09920.1	TAS1A-3'D9[-]	402	6	0.169646	0.611555	no	ATRPB15.9	TAS1A-3'D9[-]:ATRPB15.9	0.999927
AT5G10050.1	TAS3B-5'D9[+]	693	6	0.116997	0.86162	no	NA	TAS3B-5'D9[+]:AT5G10050.1	0.999927
AT5G10450.4	TAS4-3'D9[+]	519	6	0.193045	0.364875	no	14-3-3lambda	TAS4-3'D9[+]:14-3-3lambda	0.999927
AT5G10660.2	TAS3B-5'D9[+]	1090	6	0.155996	0.702548	no	NA	TAS3B-5'D9[+]:AT5G10660.2	0.999927
AT5G10860.1	TAS3C-5'D7[-]	800	5.5	1.32792	0.949122	no	CBSX3	TAS3C-5'D7[-]:CBSX3	0.999927
AT5G11030.3	TAS3B-5'D3[+]	424	5.5	0.175495	0.974144	no	ALF4	TAS3B-5'D3[+]:ALF4	0.999927
AT5G11230.1	TAS3C-5'D3[+]	959	6	0.169646	0.612805	no	NA	TAS3C-5'D3[+]:AT5G11230.1	0.999927
AT5G11670.1	TAS1A-3'D5[-]	540	6	0.237894	0.993738	no	ATNADP-ME2	TAS1A-3'D5[-]:ATNADP-ME2	0.999927
AT5G12840.4	TAS3B-5'D9[+]	960	5	0.694182	0.954937	no	ATHAP2A	TAS3B-5'D9[+]:ATHAP2A	0.999927
AT5G13460.1	TAS3C-5'D3[+]	1024	6	0.271043	0.968789	no	IQD11	TAS3C-5'D3[+]:IQD11	0.999927
AT5G13610.1	TAS1B-3'D4[-]	884	4	0.124797	0.7652	no	NA	TAS1B-3'D4[-]:AT5G13610.1	0.999927
AT5G13750.3	TAS3C-5'D8[-]	914	6	0.292492	1.06593	no	ZIFL1	TAS3C-5'D8[-]:ZIFL1	0.999927
AT5G13760.1	TAS3C-5'D2[+]	1736	6	0.220344	0.905911	no	NA	TAS3C-5'D2[+]:AT5G13760.1	0.999927
AT5G13850.1	TAS3B-5'D7[+]	572	5.5	0.403639	0.652121	no	NACA3	TAS3B-5'D7[+]:NACA3	0.999927
AT5G14030.4	TAS1A-3'D2[-]	645	5	0.354891	0.395954	no	NA	TAS1A-3'D2[-]:AT5G14030.4	0.999927
AT5G14570.1	TAS3C-5'D3[+]	1625	6	0.177445	0.536343	no	ATNRT2.7	TAS3C-5'D3[+]:ATNRT2.7	0.999927
AT5G14640.1	TAS3C-5'D3[+]	318	4.5	0.304192	0.802119	no	ATSK13	TAS3C-5'D3[+]:ATSK13	0.999927
AT5G15280.1	TAS1C-3'D9[+]	1500	6	0.235944	1.23594	no	NA	TAS1C-3'D9[+]:AT5G15280.1	0.999927
AT5G15350.1	TAS1C-3'D5[-]	368	6	0.181345	0.429721	no	AtENODL17	TAS1C-3'D5[-]:AtENODL17	0.999927
AT5G15470.1	TAS3B-5'D5[+]	412	5	0.185245	0.942621	no	GAUT14	TAS3B-5'D5[+]:GAUT14	0.999927
AT5G16500.1	TAS3A-5'D1[+]	1917	5.5	0.196945	0.65313	no	NA	TAS3A-5'D1[+]:AT5G16500.1	0.999927
AT5G16620.1	TAS3C-5'D3[+]	796	6	0.163796	0.899072	no	ATTIC40	TAS3C-5'D3[+]:ATTIC40	0.999927
AT5G17760.2	TAS3B-5'D7[+]	1727	6	0.239844	0.82273	no	NA	TAS3B-5'D7[+]:AT5G17760.2	0.999927
AT5G19990.1	TAS3B-5'D6[+]	963	4.5	0.37244	0.806378	no	ATSUG1	TAS3B-5'D6[+]:ATSUG1	0.999927
AT5G20190.1	TAS1A-3'D6[+]	644	5.5	0.434839	0.709011	no	NA	TAS1A-3'D6[+]:AT5G20190.1	0.999927
AT5G20280.1	TAS3C-5'D9[+]	534	6	0.154046	1.15405	no	ATSPS1F	TAS3C-5'D9[+]:ATSPS1F	0.999927
AT5G20490.2	TAS1C-3'D7[-]	5028	6	0.432889	1.03814	no	ATXIK	TAS1C-3'D7[-]:ATXIK	0.999927
AT5G21050.1	TAS1B-3'D7[-]	888	5.5	0.140396	0.760676	no	NA	TAS1B-3'D7[-]:AT5G21050.1	0.999927
AT5G22580.1	TAS3C-5'D3[+]	170	6	0.347091	0.138171	no	NA	TAS3C-5'D3[+]:AT5G22580.1	0.999927
AT5G23750.2	TAS3A-5'D9[+]	466	6	0.237894	0.5399	no	NA	TAS3A-5'D9[+]:AT5G23750.2	0.999927
AT5G26000.2	TAS3C-5'D2[+]	823	5.5	0.325641	0.283166	no	AtTGG1	TAS3C-5'D2[+]:AtTGG1	0.999927
AT5G26800.1	TAS1B-3'D10[+]	503	5.5	0.280793	0.803139	no	NA	TAS1B-3'D10[+]:AT5G26800.1	0.999927
AT5G27330.1	TAS3B-5'D7[+]	771	5.5	0.228144	0.982835	no	NA	TAS3B-5'D7[+]:AT5G27330.1	0.999927
AT5G27440.1	TAS1B-3'D4[-]	358	5	0.557685	1.04445	no	NA	TAS1B-3'D4[-]:AT5G27440.1	0.999927
AT5G27560.1	TAS3B-5'D9[+]	1106	4.5	0.128697	0.63134	no	NA	TAS3B-5'D9[+]:AT5G27560.1	0.999927
AT5G27650.1	TAS3C-5'D3[+]	428	5.5	0.169646	1.16965	no	NA	TAS3C-5'D3[+]:AT5G27650.1	0.999927
AT5G28540.1	TAS1B-3'D4[-]	1747	5	0.653233	0.635636	no	BIP1	TAS1B-3'D4[-]:BIP1	0.999927
AT5G28640.1	TAS2-3'D3[-]	988	5	0.430939	0.569821	no	AN3	TAS2-3'D3[-]:AN3	0.999927
AT5G32450.1	TAS1C-3'D8[-]	118	5	0.181345	0.789017	no	NA	TAS1C-3'D8[-]:AT5G32450.1	0.999927
AT5G33370.2	TAS3C-5'D4[-]	1300	3.5	0.159896	0.254656	no	NA	TAS3C-5'D4[-]:AT5G33370.2	0.999927
AT5G35630.3	TAS2-3'D4[+]	1421	6	0.879427	0.562056	no	ATGSL1	TAS2-3'D4[+]:ATGSL1	0.999927
AT5G41790.1	TAS1C-3'D5[-]	3243	6	0.194995	0.985527	no	CIP1	TAS1C-3'D5[-]:CIP1	0.999927
AT5G43630.1	TAS1B-3'D4[-]	855	6	0.267143	1.0888	no	TZP	TAS1B-3'D4[-]:TZP	0.999927
AT5G45280.2	TAS3C-5'D2[+]	1171	6	0.189145	0.547018	no	NA	TAS3C-5'D2[+]:AT5G45280.2	0.999927
AT5G46570.1	TAS3C-5'D10[+]	1509	6	0.257393	0.884747	no	BSK2	TAS3C-5'D10[+]:BSK2	0.999927
AT5G46730.2	TAS4-3'D2[-]	597	4	0.867727	0.847765	no	NA	TAS4-3'D2[-]:AT5G46730.2	0.999927
AT5G46760.1	TAS3B-5'D7[+]	1268	5.5	0.600584	1.20386	no	MYC3	TAS3B-5'D7[+]:MYC3	0.999927
AT5G46840.2	TAS3C-5'D4[-]	1566	6	0.101397	0.630512	no	NA	TAS3C-5'D4[-]:AT5G46840.2	0.999927
AT5G47120.1	TAS3C-5'D3[+]	773	6	0.333441	0.617829	no	ATBI-1	TAS3C-5'D3[+]:ATBI-1	0.999927
AT5G47420.1	TAS1A-3'D8[-]	828	6	0.428989	0.894973	no	NA	TAS1A-3'D8[-]:AT5G47420.1	0.999927
AT5G48020.1	TAS1C-3'D2[+]	844	6	0.138446	0.765349	no	NA	TAS1C-3'D2[+]:AT5G48020.1	0.999927
AT5G48180.1	TAS1B-3'D7[-]	657	5.5	0.105297	0.499486	no	AtNSP5	TAS1B-3'D7[-]:AtNSP5	0.999927
AT5G48220.3	TAS3A-5'D5[-]	1637	6	0.142346	0.806008	no	NA	TAS3A-5'D5[-]:AT5G48220.3	0.999927
AT5G48620.1	TAS3A-5'D6[+]	2476	5.5	0.304192	0.946239	no	NA	TAS3A-5'D6[+]:AT5G48620.1	0.999927
AT5G48655.3	TAS4-3'D3[+]	801	5.5	0.232044	0.89263	no	NA	TAS4-3'D3[+]:AT5G48655.3	0.999927
AT5G48880.3	TAS2-3'D8[+]	424	6	0.343191	0.791005	no	KAT5	TAS2-3'D8[+]:KAT5	0.999927
AT5G50460.1	TAS1A-3'D8[-]	189	4	1.57751	0.295459	no	NA	TAS1A-3'D8[-]:AT5G50460.1	0.999927
AT5G51260.1	TAS2-3'D6[-]	977	6	0.243744	0.739232	no	NA	TAS2-3'D6[-]:AT5G51260.1	0.999927
AT5G52070.1	TAS1B-3'D5[+]	755	4.5	0.224244	0.847469	no	NA	TAS1B-3'D5[+]:AT5G52070.1	0.999927
AT5G54630.1	TAS3A-5'D1[+]	649	5.5	0.202795	0.87021	no	NA	TAS3A-5'D1[+]:AT5G54630.1	0.999927
AT5G54970.1	TAS2-3'D6[+]	219	4	0.282743	0.686794	no	NA	TAS2-3'D6[+]:AT5G54970.1	0.999927
AT5G56460.1	TAS1B-3'D10[+]	612	5	0.674682	1.1546	no	NA	TAS1B-3'D10[+]:AT5G56460.1	0.999927
AT5G56970.1	TAS3C-5'D9[+]	1517	5.5	0.614234	0.927198	no	ATCKX3	TAS3C-5'D9[+]:ATCKX3	0.999927
AT5G57000.2	TAS2-3'D1[-]	618	5	0.159896	0.931124	no	NA	TAS2-3'D1[-]:AT5G57000.2	0.999927
AT5G57990.1	TAS3B-5'D7[+]	2164	6	0.194995	0.666244	no	UBP23	TAS3B-5'D7[+]:UBP23	0.999927
AT5G58170.1	TAS1A-3'D2[+]	2394	6	0.191095	0.71373	no	GDPDL7	TAS1A-3'D2[+]:GDPDL7	0.999927
AT5G58190.2	TAS3B-5'D1[+]	1157	6	0.269093	1.05341	no	ECT10	TAS3B-5'D1[+]:ECT10	0.999927
AT5G58720.3	TAS3A-5'D6[+]	1702	6	0.140396	0.591438	no	NA	TAS3A-5'D6[+]:AT5G58720.3	0.999927
AT5G59450.1	TAS3B-5'D6[+]	643	5	0.115047	0.825355	no	NA	TAS3B-5'D6[+]:AT5G59450.1	0.999927
AT5G60010.1	TAS3C-5'D2[+]	1743	5	0.159896	0.916774	no	NA	TAS3C-5'D2[+]:AT5G60010.1	0.999927
AT5G60670.1	TAS3C-5'D3[+]	305	6	0.505037	0.55059	no	NA	TAS3C-5'D3[+]:AT5G60670.1	0.999927
AT5G62020.1	TAS1C-3'D8[-]	928	5	0.152096	0.802944	no	AT-HSFB2A	TAS1C-3'D8[-]:AT-HSFB2A	0.999927
AT5G63420.1	TAS3C-5'D3[+]	2606	6	0.171595	0.817645	no	emb2746	TAS3C-5'D3[+]:emb2746	0.999927
AT5G63870.3	TAS1C-3'D5[-]	947	5.5	0.161846	0.842962	no	ATPP7	TAS1C-3'D5[-]:ATPP7	0.999927
AT5G64170.2	TAS3B-5'D9[+]	1869	5	0.469938	0.726354	no	NA	TAS3B-5'D9[+]:AT5G64170.2	0.999927
AT5G65220.1	TAS3B-5'D9[+]	450	6	0.694182	0.699076	no	NA	TAS3B-5'D9[+]:AT5G65220.1	0.999927
AT5G65690.1	TAS1B-3'D5[+]	1667	6	0.115047	0.680889	no	PCK2	TAS1B-3'D5[+]:PCK2	0.999927
AT5G65770.3	TAS2-3'D5[+]	3058	5	0.183295	0.774187	no	CRWN4	TAS2-3'D5[+]:CRWN4	0.999927
AT5G65780.2	TAS2-3'D5[+]	3082	5	0.183295	0.774187	no	ATBCAT-5	TAS2-3'D5[+]:ATBCAT-5	0.999927
AT5G66210.4	TAS3C-5'D5[+]	1846	6	0.150146	0.75539	no	CPK28	TAS3C-5'D5[+]:CPK28	0.999927
AT5G66760.1	TAS1C-3'D5[-]	1777	6	0.187195	0.537918	no	SDH1-1	TAS1C-3'D5[-]:SDH1-1	0.999927
AT5G67070.1	TAS3A-5'D4[-]	137	5	0.206695	0.491984	no	RALFL34	TAS3A-5'D4[-]:RALFL34	0.999927
AT5G67150.1	TAS3A-5'D7[+]	327	5.5	0.173545	0.957063	no	NA	TAS3A-5'D7[+]:AT5G67150.1	0.999927
AT5G67370.1	TAS3A-5'D7[+]	714	6	0.0799479	0.517683	no	CGLD27	TAS3A-5'D7[+]:CGLD27	0.999927
AT5G67490.1	TAS3C-5'D3[+]	693	5	0.109197	0.825792	no	NA	TAS3C-5'D3[+]:AT5G67490.1	0.999927
AT5G67590.1	TAS3A-5'D7[+]	448	5	0.655183	0.544182	no	FRO1	TAS3A-5'D7[+]:FRO1	0.999927
ATCG00170.1	TAS2-3'D8[-]	562	6	0.280793	0.734851	no	RPOC2	TAS2-3'D8[-]:RPOC2	0.999927
ATCG00380.1	TAS3B-5'D8[+]	235	6	2.59928	0.150082	no	RPS4	TAS3B-5'D8[+]:RPS4	0.999927
ATCG00830.1	TAS3B-5'D9[+]	771	4.5	3.33246	0.340415	no	RPL2.1	TAS3B-5'D9[+]:RPL2.1	0.999927
ATCG01040.1	TAS1B-3'D9[+]	199	3.5	0.867727	0.133648	no	YCF5	TAS1B-3'D9[+]:YCF5	0.999927
ATCG01130.1	TAS3C-5'D4[+]	4586	6	0.282743	0.397283	no	YCF1.2	TAS3C-5'D4[+]:YCF1.2	0.999927
ATMG00513.1	TAS3A-5'D2[-]	1342	6	0.0916476	0.522314	no	NAD5	TAS3A-5'D2[-]:NAD5	0.999927
ATMG00590.1	TAS4-3'D3[+]	811	5	0.0779979	0.267349	no	ORF313	TAS4-3'D3[+]:ORF313	0.999927
ATMG00900.1	TAS3A-5'D4[-]	658	5	0.0643483	1.06435	no	ABCI3	TAS3A-5'D4[-]:ABCI3	0.999927

## Sheet: Col-0 (+Xrn1) (biorep #1)
Target transcript	tasiRNA	tasiRNA slice site position in target transcript	Allen score of sRNA:target duplex	Slice site RPM	Slice site RPM + 1/Maximum adjacent site RPM + 1	Previously verified by 5' RACE?	Target gene common name	Interaction name	P-value adjusted for multiple testing
AT1G01090.1	TAS3C-5'D5[+]	1001	5.5	1.75223	0.692502	no	PDH-E1 ALPHA	TAS3C-5'D5[+]:PDH-E1 ALPHA	0.999702
AT1G01630.1	TAS3C-5'D9[+]	856	5.5	0.0948661	0.581851	no	NA	TAS3C-5'D9[+]:AT1G01630.1	0.999702
AT1G03970.1	TAS3A-5'D6[+]	408	6	0.452009	1.18704	no	GBF4	TAS3A-5'D6[+]:GBF4	0.999702
AT1G04040.1	TAS3C-5'D8[-]	1007	5.5	0.892857	0.794007	no	NA	TAS3C-5'D8[-]:AT1G04040.1	0.999702
AT1G07320.4	TAS1B-3'D4[-]	853	6	1.54576	0.110294	no	EMB2784	TAS1B-3'D4[-]:EMB2784	0.999702
AT1G09770.1	TAS3A-5'D8[+]	2825	6	3.45982	2.01716	no	ATCDC5	TAS3A-5'D8[+]:ATCDC5	0.999702
AT1G11860.3	TAS3B-5'D1[+]	1447	6	1.66853	0.313122	no	NA	TAS3B-5'D1[+]:AT1G11860.3	0.999702
AT1G11910.1	TAS4-3'D7[-]	1668	5	1.13281	0.809403	no	APA1	TAS4-3'D7[-]:APA1	0.999702
AT1G12090.1	TAS4-3'D7[+]	784	5.5	0.93192	0.189678	no	ELP	TAS4-3'D7[+]:ELP	0.999702
AT1G12310.1	TAS1B-3'D2[+]	499	5.5	1.72991	0.660902	no	NA	TAS1B-3'D2[+]:AT1G12310.1	0.999702
AT1G13020.1	TAS3B-5'D7[+]	1893	5	0.485491	1.12701	no	EIF4B2	TAS3B-5'D7[+]:EIF4B2	0.999702
AT1G13270.2	TAS3A-5'D6[+]	798	6	0.145089	0.719495	no	MAP1B	TAS3A-5'D6[+]:MAP1B	0.999702
AT1G13690.1	TAS3C-5'D3[+]	550	5.5	0.524554	0.321715	no	ATE1	TAS3C-5'D3[+]:ATE1	0.999702
AT1G14460.1	TAS3C-5'D9[+]	160	4.5	0.00558036	0.627437	no	NA	TAS3C-5'D9[+]:AT1G14460.1	0.999702
AT1G15270.1	TAS3B-5'D9[+]	207	6	1.06027	0.432724	no	NA	TAS3B-5'D9[+]:AT1G15270.1	0.999702
AT1G17220.1	TAS3B-5'D7[+]	1026	6	0.47433	1.01537	no	FUG1	TAS3B-5'D7[+]:FUG1	0.999702
AT1G18540.1	TAS4-3'D8[+]	728	4.5	0.167411	0.311217	no	NA	TAS4-3'D8[+]:AT1G18540.1	0.999702
AT1G19130.1	TAS3C-5'D2[-]	786	4	0.273438	0.742839	no	NA	TAS3C-5'D2[-]:AT1G19130.1	0.999702
AT1G20130.2	TAS4-3'D7[+]	1746	4.5	0.77567	0.415839	no	NA	TAS4-3'D7[+]:AT1G20130.2	0.999702
AT1G22160.1	TAS1A-3'D3[+]	327	5.5	1.64062	1.02825	no	NA	TAS1A-3'D3[+]:AT1G22160.1	0.999702
AT1G23190.1	TAS3B-5'D6[+]	1786	6	1.66853	0.651322	no	PGM3	TAS3B-5'D6[+]:PGM3	0.999702
AT1G27210.1	TAS1A-3'D9[-]	997	6	0.239955	1.23995	no	NA	TAS1A-3'D9[-]:AT1G27210.1	0.999702
AT1G27435.1	TAS3B-5'D6[+]	105	6	1.48438	0.921359	no	NA	TAS3B-5'D6[+]:AT1G27435.1	0.999702
AT1G31920.1	TAS1A-3'D9[-]	1328	6	0.133929	1.13393	no	NA	TAS1A-3'D9[-]:AT1G31920.1	0.999702
AT1G34030.1	TAS3C-5'D2[+]	355	6	0.78683	0.478481	no	NA	TAS3C-5'D2[+]:AT1G34030.1	0.999702
AT1G36390.2	TAS3C-5'D2[+]	506	6	0.63058	1.21144	no	NA	TAS3C-5'D2[+]:AT1G36390.2	0.999702
AT1G44760.1	TAS1A-3'D8[-]	386	6	0.881696	1.05309	no	NA	TAS1A-3'D8[-]:AT1G44760.1	0.999702
AT1G48630.1	TAS2-3'D4[-]	987	5	0.61942	0.314341	no	RACK1B	TAS2-3'D4[-]:RACK1B	0.999702
AT1G52670.1	TAS2-3'D3[-]	1010	4.5	0.563616	0.816433	no	NA	TAS2-3'D3[-]:AT1G52670.1	0.999702
AT1G54570.1	TAS3C-5'D4[+]	1791	5	0.251116	0.791667	no	PES1	TAS3C-5'D4[+]:PES1	0.999702
AT1G56070.1	TAS1C-3'D6[-]	2382	5	0.167411	0.204457	no	LOS1	TAS1C-3'D6[-]:LOS1	0.999702
AT1G57720.2	TAS3B-5'D8[+]	1181	6	1.88058	0.364497	no	NA	TAS3B-5'D8[+]:AT1G57720.2	0.999702
AT1G59580.2	TAS1A-3'D7[-]	879	5.5	0.485491	1.48549	no	ATMPK2	TAS1A-3'D7[-]:ATMPK2	0.999702
AT1G60940.2	TAS3C-5'D10[+]	437	6	0.46317	1	no	SNRK2-10	TAS3C-5'D10[+]:SNRK2-10	0.999702
AT1G62640.2	TAS3C-5'D1[+]	548	6	0.541295	0.432103	no	KAS III	TAS3C-5'D1[+]:KAS III	0.999702
AT1G63000.1	TAS3C-5'D2[-]	1161	4	0.714286	0.447683	no	NRS/ER	TAS3C-5'D2[-]:NRS/ER	0.999702
AT1G63840.1	TAS3A-5'D4[-]	783	4.5	0.491071	0.549568	no	NA	TAS3A-5'D4[-]:AT1G63840.1	0.999702
AT1G66350.1	TAS1C-3'D7[-]	1591	5	3.44866	1.04592	no	RGL	TAS1C-3'D7[-]:RGL	0.999702
AT1G68560.1	TAS1A-3'D7[+]	2201	5.5	0.279018	0.379345	no	ATXYL1	TAS1A-3'D7[+]:ATXYL1	0.999702
AT1G69690.1	TAS4-3'D9[-]	1510	5	0.853795	1.11402	no	AtTCP15	TAS4-3'D9[-]:AtTCP15	0.999702
AT1G70690.1	TAS3B-5'D1[+]	863	4.5	0.747768	0.82595	no	HWI1	TAS3B-5'D1[+]:HWI1	0.999702
AT1G70820.1	TAS3B-5'D1[+]	1605	4.5	4.05134	3.21906	no	NA	TAS3B-5'D1[+]:AT1G70820.1	0.999702
AT1G70940.1	TAS3C-5'D2[-]	2363	5.5	0.909598	1.9096	no	ATPIN3	TAS3C-5'D2[-]:ATPIN3	0.999702
AT1G71070.1	TAS3C-5'D3[+]	1649	5	0.686384	0.641342	no	NA	TAS3C-5'D3[+]:AT1G71070.1	0.999702
AT1G73220.1	TAS3C-5'D7[-]	714	6	0.46317	1.46317	no	AtOCT1	TAS3C-5'D7[-]:AtOCT1	0.999702
AT1G75950.1	TAS4-3'D4[+]	215	6	1.05469	0.502183	no	ASK1	TAS4-3'D4[+]:ASK1	0.999702
AT1G76080.1	TAS4-3'D4[-]	150	5	0.362723	0.566326	no	ATCDSP32	TAS4-3'D4[-]:ATCDSP32	0.999702
AT1G76890.2	TAS1A-3'D9[-]	862	6	0.30692	0.682401	no	AT-GT2	TAS1A-3'D9[-]:AT-GT2	0.999702
AT1G79060.1	TAS1A-3'D7[-]	1110	5.5	1.11049	1.29432	no	NA	TAS1A-3'D7[-]:AT1G79060.1	0.999702
AT1G79830.4	TAS1C-3'D7[-]	1182	5.5	0.184152	0.673223	no	GC5	TAS1C-3'D7[-]:GC5	0.999702
AT1G79940.4	TAS2-3'D5[+]	1255	5.5	0.424107	0.897959	no	ATERDJ2A	TAS2-3'D5[+]:ATERDJ2A	0.999702
AT1G80460.2	TAS3A-5'D9[-]	1087	5.5	0.46875	1	no	GLI1	TAS3A-5'D9[-]:GLI1	0.999702
AT2G01350.4	TAS1A-3'D7[-]	944	5	0.379464	0.78676	no	QPT	TAS1A-3'D7[-]:QPT	0.999702
AT2G02180.1	TAS3C-5'D9[+]	1100	4.5	0.446429	0.53202	no	TOM3	TAS3C-5'D9[+]:TOM3	0.999702
AT2G03680.2	TAS4-3'D2[-]	310	5.5	0.47433	0.550187	no	SKU6	TAS4-3'D2[-]:SKU6	0.999702
AT2G04350.2	TAS1B-3'D7[-]	1814	6	0.485491	1.25448	no	LACS8	TAS1B-3'D7[-]:LACS8	0.999702
AT2G06530.1	TAS3A-5'D6[+]	623	5	0.892857	1.05276	no	VPS2.1	TAS3A-5'D6[+]:VPS2.1	0.999702
AT2G18020.1	TAS3C-5'D10[-]	425	6	2.73996	0.36184	no	EMB2296	TAS3C-5'D10[-]:EMB2296	0.999702
AT2G19480.3	TAS3A-5'D1[+]	1195	5.5	0.758929	0.402966	no	NAP1;2	TAS3A-5'D1[+]:NAP1;2	0.999702
AT2G20890.1	TAS4-3'D2[+]	206	6	0.518973	0.359008	no	PSB29	TAS4-3'D2[+]:PSB29	0.999702
AT2G21660.2	TAS4-3'D2[-]	542	5.5	19.2299	0.523781	no	ATGRP7	TAS4-3'D2[-]:ATGRP7	0.999702
AT2G22795.1	TAS3B-5'D9[+]	1697	5.5	0.217634	0.539832	no	NA	TAS3B-5'D9[+]:AT2G22795.1	0.999702
AT2G23700.1	TAS1A-3'D6[+]	754	5.5	0.200893	1.20089	no	NA	TAS1A-3'D6[+]:AT2G23700.1	0.999702
AT2G25210.1	TAS3C-5'D4[-]	298	4	2.48326	1.12226	no	NA	TAS3C-5'D4[-]:AT2G25210.1	0.999702
AT2G25930.1	TAS3C-5'D10[+]	2440	5	9.22433	7.01455	no	ELF3	TAS3C-5'D10[+]:ELF3	0.999702
AT2G26280.1	TAS2-3'D6[+]	665	5.5	0.189732	1	no	CID7	TAS2-3'D6[+]:CID7	0.999702
AT2G26940.1	TAS3C-5'D3[+]	242	6	0.172991	1.16004	no	NA	TAS3C-5'D3[+]:AT2G26940.1	0.999702
AT2G27510.1	TAS3B-5'D8[+]	266	6	0.440848	0.360011	no	ATFD3	TAS3B-5'D8[+]:ATFD3	0.999702
AT2G28910.1	TAS3B-5'D7[+]	560	5.5	1.26116	1.32765	no	CXIP4	TAS3B-5'D7[+]:CXIP4	0.999702
AT2G30050.1	TAS1C-3'D6[-]	181	6	0.128348	0.637453	no	NA	TAS1C-3'D6[-]:AT2G30050.1	0.999702
AT2G36160.1	TAS1B-3'D4[-]	536	5.5	0.223214	0.159048	no	NA	TAS1B-3'D4[-]:AT2G36160.1	0.999702
AT2G40650.1	TAS3C-5'D3[+]	1134	4	0.172991	0.73962	no	NA	TAS3C-5'D3[+]:AT2G40650.1	0.999702
AT2G41070.3	TAS3B-5'D7[+]	44	6	0.0334821	0.714506	no	ATBZIP12	TAS3B-5'D7[+]:ATBZIP12	0.999702
AT2G44255.1	TAS3B-5'D7[+]	1298	6	0.00558036	0.714512	no	NA	TAS3B-5'D7[+]:AT2G44255.1	0.999702
AT2G45960.3	TAS1B-3'D4[+]	1185	6	0.340402	0.558345	no	ATHH2	TAS1B-3'D4[+]:ATHH2	0.999702
AT2G46000.1	TAS3B-5'D6[+]	717	5	0.178571	0.897959	no	NA	TAS3B-5'D6[+]:AT2G46000.1	0.999702
AT2G46820.2	TAS3B-5'D9[-]	803	4.5	1.63504	0.805525	no	PSAP	TAS3B-5'D9[-]:PSAP	0.999702
AT3G02080.1	TAS1C-3'D7[-]	447	5	0.93192	0.36168	no	NA	TAS1C-3'D7[-]:AT3G02080.1	0.999702
AT3G02230.1	TAS3A-5'D4[-]	1223	3.5	0.825893	0.222102	no	ATRGP1	TAS3A-5'D4[-]:ATRGP1	0.999702
AT3G04210.1	TAS3B-5'D5[+]	1687	5	0.452009	0.866756	no	NA	TAS3B-5'D5[+]:AT3G04210.1	0.999702
AT3G04920.1	TAS3A-5'D8[+]	255	5	2.37723	1.14578	no	NA	TAS3A-5'D8[+]:AT3G04920.1	0.999702
AT3G05020.1	TAS3C-5'D3[+]	258	5.5	0.976562	0.429229	no	ACP	TAS3C-5'D3[+]:ACP	0.999702
AT3G05030.2	TAS1A-3'D7[-]	675	4	0.407366	0.913106	no	ATNHX2	TAS1A-3'D7[-]:ATNHX2	0.999702
AT3G05910.2	TAS3C-5'D3[+]	373	5	0.228795	0.740915	no	NA	TAS3C-5'D3[+]:AT3G05910.2	0.999702
AT3G06483.1	TAS3A-5'D5[-]	1397	6	0.128348	0.748335	no	ATPDHK	TAS3A-5'D5[-]:ATPDHK	0.999702
AT3G08510.3	TAS1A-3'D7[-]	1515	6	0.401786	0.389941	no	ATPLC2	TAS1A-3'D7[-]:ATPLC2	0.999702
AT3G08550.1	TAS1B-3'D5[+]	1300	6	0.15625	0.838188	no	ABI8	TAS1B-3'D5[+]:ABI8	0.999702
AT3G09740.1	TAS3C-5'D4[-]	938	4.5	0.736607	0.593667	no	ATSYP71	TAS3C-5'D4[-]:ATSYP71	0.999702
AT3G12260.1	TAS3A-5'D4[-]	259	6	0.652902	0.376749	no	NA	TAS3A-5'D4[-]:AT3G12260.1	0.999702
AT3G12810.1	TAS3B-5'D9[+]	5037	5.5	0.78125	1.0924	no	chr13	TAS3B-5'D9[+]:chr13	0.999702
AT3G13060.2	TAS3C-5'D3[+]	2200	5	0.418527	1.41853	no	ECT5	TAS3C-5'D3[+]:ECT5	0.999702
AT3G13180.1	TAS3A-5'D9[+]	1048	5	0.725446	1.27138	no	NA	TAS3A-5'D9[+]:AT3G13180.1	0.999702
AT3G17820.1	TAS3C-5'D2[-]	1272	6	0.267857	0.599156	no	ATGSKB6	TAS3C-5'D2[-]:ATGSKB6	0.999702
AT3G17930.1	TAS3A-5'D5[+]	684	4	0.574777	0.794482	no	DAC	TAS3A-5'D5[+]:DAC	0.999702
AT3G18390.1	TAS3C-5'D9[+]	2852	6	1.04911	2.04911	no	EMB1865	TAS3C-5'D9[+]:EMB1865	0.999702
AT3G19340.1	TAS1B-3'D10[+]	620	5.5	0.340402	1.03445	no	NA	TAS1B-3'D10[+]:AT3G19340.1	0.999702
AT3G20090.1	TAS3C-5'D9[+]	127	6	0.0725446	0.467413	no	CYP705A18	TAS3C-5'D9[+]:CYP705A18	0.999702
AT3G20890.1	TAS1C-3'D9[-]	776	5.5	1.36161	1.87091	no	NA	TAS1C-3'D9[-]:AT3G20890.1	0.999702
AT3G21110.2	TAS4-3'D6[+]	978	5	0.887277	0.971281	no	ATPURC	TAS4-3'D6[+]:ATPURC	0.999702
AT3G23450.1	TAS4-3'D2[-]	317	5.5	0.0167411	0.600924	no	NA	TAS4-3'D2[-]:AT3G23450.1	0.999702
AT3G24420.1	TAS3C-5'D2[-]	1011	5	0.915179	0.890967	no	NA	TAS3C-5'D2[-]:AT3G24420.1	0.999702
AT3G24490.1	TAS3A-5'D4[-]	117	2.5	0.206473	0.847179	no	NA	TAS3A-5'D4[-]:AT3G24490.1	0.999702
AT3G28030.1	TAS3B-5'D9[+]	3901	6	0.195312	1.19531	no	UVH3	TAS3B-5'D9[+]:UVH3	0.999702
AT3G28720.1	TAS1C-3'D2[+]	1950	6	1.04353	1.03681	no	NA	TAS1C-3'D2[+]:AT3G28720.1	0.999702
AT3G28830.1	TAS3C-5'D2[+]	487	5.5	0.485491	0.635018	no	NA	TAS3C-5'D2[+]:AT3G28830.1	0.999702
AT3G44160.1	TAS3C-5'D9[+]	1520	6	0.323661	1.32366	no	NA	TAS3C-5'D9[+]:AT3G44160.1	0.999702
AT3G47700.1	TAS3B-5'D7[+]	2413	4	0.217634	1.21763	no	MAG2	TAS3B-5'D7[+]:MAG2	0.999702
AT3G47910.2	TAS3C-5'D3[+]	5340	4.5	0.753348	1.42043	no	NA	TAS3C-5'D3[+]:AT3G47910.2	0.999702
AT3G49910.1	TAS1C-3'D6[+]	581	5	0.814732	0.0465822	no	NA	TAS1C-3'D6[+]:AT3G49910.1	0.999702
AT3G51550.1	TAS2-3'D3[-]	2979	6	0.602679	0.659927	no	FER	TAS2-3'D3[-]:FER	0.999702
AT3G52300.2	TAS3B-5'D5[+]	377	6	0.535714	0.37129	no	ATPQ	TAS3B-5'D5[+]:ATPQ	0.999702
AT3G54050.2	TAS3B-5'D7[+]	1280	5.5	0.541295	0.232062	no	HCEF1	TAS3B-5'D7[+]:HCEF1	0.999702
AT3G54390.1	TAS3C-5'D3[+]	909	6	0.267857	1.26786	no	NA	TAS3C-5'D3[+]:AT3G54390.1	0.999702
AT3G54760.2	TAS3A-5'D2[+]	2594	5	1.98661	1.06148	no	NA	TAS3A-5'D2[+]:AT3G54760.2	0.999702
AT3G55690.1	TAS3B-5'D6[+]	617	4	0.859375	1.85938	no	NA	TAS3B-5'D6[+]:AT3G55690.1	0.999702
AT3G60740.1	TAS3C-5'D3[+]	3587	6	0.100446	1.10045	no	CHO	TAS3C-5'D3[+]:CHO	0.999702
AT3G60910.1	TAS1A-3'D8[-]	784	4	0.78683	1.24495	no	NA	TAS1A-3'D8[-]:AT3G60910.1	0.999702
AT3G62840.2	TAS3A-5'D1[+]	162	6	0.323661	0.308372	no	NA	TAS3A-5'D1[+]:AT3G62840.2	0.999702
AT4G01000.1	TAS1B-3'D4[-]	509	5.5	0.15625	0.320148	no	NA	TAS1B-3'D4[-]:AT4G01000.1	0.999702
AT4G02150.1	TAS2-3'D3[+]	1240	5	0.792411	1.23444	no	ATIMPALPHA3	TAS2-3'D3[+]:ATIMPALPHA3	0.999702
AT4G02360.1	TAS2-3'D4[+]	510	6	0.128348	0.737418	no	NA	TAS2-3'D4[+]:AT4G02360.1	0.999702
AT4G02530.1	TAS3B-5'D9[+]	298	6	0.228795	0.574636	no	NA	TAS3B-5'D9[+]:AT4G02530.1	0.999702
AT4G04640.1	TAS4-3'D9[-]	1325	6	0.412946	0.388224	no	ATPC1	TAS4-3'D9[-]:ATPC1	0.999702
AT4G09160.1	TAS1A-3'D7[-]	1866	6	2.59487	2.46631	no	NA	TAS1A-3'D7[-]:AT4G09160.1	0.999702
AT4G11560.1	TAS1A-3'D7[-]	1693	6	0.334821	0.91228	no	NA	TAS1A-3'D7[-]:AT4G11560.1	0.999702
AT4G12790.5	TAS1B-3'D4[-]	708	5.5	0.77567	0.455743	no	NA	TAS1B-3'D4[-]:AT4G12790.5	0.999702
AT4G12910.1	TAS3B-5'D3[+]	1848	4	0.446429	1	no	scpl20	TAS3B-5'D3[+]:scpl20	0.999702
AT4G13730.3	TAS1C-3'D5[+]	1293	6	0.373884	0.74112	no	NA	TAS1C-3'D5[+]:AT4G13730.3	0.999702
AT4G14690.1	TAS4-3'D4[-]	265	5.5	0.424107	0.169433	no	ELIP2	TAS4-3'D4[-]:ELIP2	0.999702
AT4G15802.1	TAS3A-5'D9[-]	529	3.5	0.669643	1.01013	no	AtHSBP	TAS3A-5'D9[-]:AtHSBP	0.999702
AT4G17510.1	TAS4-3'D8[-]	661	6	0.0837054	0.676184	no	UCH3	TAS4-3'D8[-]:UCH3	0.999702
AT4G18970.2	TAS3B-5'D10[-]	824	6	0.301339	0.60856	no	NA	TAS3B-5'D10[-]:AT4G18970.2	0.999702
AT4G19530.1	TAS3B-5'D4[+]	87	5.5	0.608259	1.60826	no	NA	TAS3B-5'D4[+]:AT4G19530.1	0.999702
AT4G24100.1	TAS3C-5'D2[-]	2625	4	0.362723	0.499182	no	NA	TAS3C-5'D2[-]:AT4G24100.1	0.999702
AT4G25370.1	TAS3B-5'D10[+]	775	5	0.452009	0.349168	no	NA	TAS3B-5'D10[+]:AT4G25370.1	0.999702
AT4G26190.1	TAS4-3'D3[+]	2024	5.5	0.652902	1.09218	no	NA	TAS4-3'D3[+]:AT4G26190.1	0.999702
AT4G26630.2	TAS3B-5'D9[+]	2186	6	0.15067	0.717967	no	NA	TAS3B-5'D9[+]:AT4G26630.2	0.999702
AT4G26630.2	TAS3C-5'D3[+]	836	6	0.479911	1.11804	no	NA	TAS3C-5'D3[+]:AT4G26630.2	0.999702
AT4G28750.1	TAS3A-5'D7[+]	329	6	0.279018	0.244298	no	PSAE-1	TAS3A-5'D7[+]:PSAE-1	0.999702
AT4G29060.2	TAS4-3'D4[+]	1144	6	0.703125	0.548724	no	emb2726	TAS4-3'D4[+]:emb2726	0.999702
AT4G29150.1	TAS1C-3'D2[+]	1298	4.5	0.412946	1.41295	no	IQD25	TAS1C-3'D2[+]:IQD25	0.999702
AT4G29360.2	TAS3A-5'D1[+]	1381	6	0.206473	0.601894	no	NA	TAS3A-5'D1[+]:AT4G29360.2	0.999702
AT4G30560.2	TAS2-3'D5[+]	2024	5.5	1.01004	1.33804	no	ATCNGC9	TAS2-3'D5[+]:ATCNGC9	0.999702
AT4G31300.3	TAS3B-5'D1[+]	411	5	3.47656	1.32333	no	PBA1	TAS3B-5'D1[+]:PBA1	0.999702
AT4G31880.2	TAS3B-5'D7[+]	2774	5	0.457589	1.18619	no	NA	TAS3B-5'D7[+]:AT4G31880.2	0.999702
AT4G32410.1	TAS1B-3'D4[-]	3035	6	0.731027	0.695203	no	AtCESA1	TAS1B-3'D4[-]:AtCESA1	0.999702
AT4G33790.1	TAS3C-5'D8[-]	1417	5.5	0.691964	0.339454	no	CER4	TAS3C-5'D8[-]:CER4	0.999702
AT4G39820.1	TAS3B-5'D3[+]	1312	6	0.429688	0.479595	no	NA	TAS3B-5'D3[+]:AT4G39820.1	0.999702
AT5G01210.1	TAS3B-5'D5[+]	1449	6	2.31027	1.75399	no	NA	TAS3B-5'D5[+]:AT5G01210.1	0.999702
AT5G01410.1	TAS4-3'D6[+]	694	6	0.446429	0.30487	no	ATPDX1	TAS4-3'D6[+]:ATPDX1	0.999702
AT5G02670.1	TAS4-3'D10[-]	936	5.5	0.535714	1.12235	no	NA	TAS4-3'D10[-]:AT5G02670.1	0.999702
AT5G03040.3	TAS1A-3'D9[-]	1152	6	1.94196	0.934418	no	iqd2	TAS1A-3'D9[-]:iqd2	0.999702
AT5G05690.3	TAS4-3'D9[+]	702	5.5	0.853795	0.452465	no	CBB3	TAS4-3'D9[+]:CBB3	0.999702
AT5G05987.1	TAS3B-5'D7[+]	56	4.5	0.407366	0.863108	no	PRA1.A2	TAS3B-5'D7[+]:PRA1.A2	0.999702
AT5G06270.1	TAS3A-5'D1[+]	770	4.5	1.89732	1.1282	no	NA	TAS3A-5'D1[+]:AT5G06270.1	0.999702
AT5G07030.1	TAS1A-3'D2[+]	965	4	1.14397	1.64048	no	NA	TAS1A-3'D2[+]:AT5G07030.1	0.999702
AT5G08590.1	TAS1C-3'D6[-]	899	3.5	0.424107	0.583715	no	ASK2	TAS1C-3'D6[-]:ASK2	0.999702
AT5G10450.4	TAS4-3'D9[+]	519	6	0.965402	0.715563	no	14-3-3lambda	TAS4-3'D9[+]:14-3-3lambda	0.999702
AT5G10660.2	TAS3B-5'D9[+]	1090	6	0.491071	1.49107	no	NA	TAS3B-5'D9[+]:AT5G10660.2	0.999702
AT5G14030.4	TAS1A-3'D2[-]	645	5	0.602679	0.36764	no	NA	TAS1A-3'D2[-]:AT5G14030.4	0.999702
AT5G15700.2	TAS3C-5'D3[+]	687	6	0.636161	1.63616	no	NA	TAS3C-5'D3[+]:AT5G15700.2	0.999702
AT5G16010.1	TAS3C-5'D9[-]	749	6	0.591518	0.989591	no	NA	TAS3C-5'D9[-]:AT5G16010.1	0.999702
AT5G16260.1	TAS3B-5'D7[+]	1456	5	0.535714	0.916722	no	ELF9	TAS3B-5'D7[+]:ELF9	0.999702
AT5G20190.1	TAS1A-3'D6[+]	644	5.5	0.647321	0.449178	no	NA	TAS1A-3'D6[+]:AT5G20190.1	0.999702
AT5G27560.1	TAS3B-5'D9[+]	1106	4.5	0.217634	0.652903	no	NA	TAS3B-5'D9[+]:AT5G27560.1	0.999702
AT5G28540.1	TAS1B-3'D4[-]	1747	5	0.597098	0.858943	no	BIP1	TAS1B-3'D4[-]:BIP1	0.999702
AT5G28640.1	TAS2-3'D3[-]	988	5	0.228795	0.777543	no	AN3	TAS2-3'D3[-]:AN3	0.999702
AT5G33370.2	TAS3C-5'D4[-]	1300	3.5	14.7266	0.220358	no	NA	TAS3C-5'D4[-]:AT5G33370.2	0.999702
AT5G35100.2	TAS3A-5'D1[+]	389	5	0.563616	0.861624	no	NA	TAS3A-5'D1[+]:AT5G35100.2	0.999702
AT5G35630.3	TAS2-3'D4[+]	1421	6	1.2221	0.280383	no	ATGSL1	TAS2-3'D4[+]:ATGSL1	0.999702
AT5G41140.2	TAS3B-5'D8[+]	778	5	1.9029	2.01472	no	NA	TAS3B-5'D8[+]:AT5G41140.2	0.999702
AT5G43850.1	TAS3B-5'D5[+]	136	5.5	0.111607	0.0953932	no	ARD4	TAS3B-5'D5[+]:ARD4	0.999702
AT5G43960.2	TAS4-3'D3[-]	362	4.5	0.167411	1	no	NA	TAS4-3'D3[-]:AT5G43960.2	0.999702
AT5G44510.1	TAS1C-3'D9[-]	2292	5.5	0.267857	1.26786	no	TAO1	TAS1C-3'D9[-]:TAO1	0.999702
AT5G47050.1	TAS3C-5'D3[-]	256	6	0.954241	1.47019	no	NA	TAS3C-5'D3[-]:AT5G47050.1	0.999702
AT5G47100.1	TAS1A-3'D7[+]	891	5.5	0.284598	0.777177	no	ATCBL9	TAS1A-3'D7[+]:ATCBL9	0.999702
AT5G49430.1	TAS3A-5'D2[+]	3915	5.5	0.234375	0.795112	no	NA	TAS3A-5'D2[+]:AT5G49430.1	0.999702
AT5G50375.2	TAS3A-5'D3[+]	805	5.5	0.602679	1.60268	no	CPI1	TAS3A-5'D3[+]:CPI1	0.999702
AT5G50460.1	TAS1A-3'D8[-]	189	4	0.552455	0.0315949	no	NA	TAS1A-3'D8[-]:AT5G50460.1	0.999702
AT5G51750.1	TAS2-3'D5[-]	928	5	0.758929	0.62639	no	ATSBT1.3	TAS2-3'D5[-]:ATSBT1.3	0.999702
AT5G52660.2	TAS3B-5'D1[+]	487	4.5	0.569196	1.5692	no	NA	TAS3B-5'D1[+]:AT5G52660.2	0.999702
AT5G52920.1	TAS4-3'D1[-]	1531	6	1.72991	1.1088	no	PKP-BETA1	TAS4-3'D1[-]:PKP-BETA1	0.999702
AT5G53580.1	TAS3C-5'D3[+]	1186	6	0.608259	0.989698	no	AtPLR1	TAS3C-5'D3[+]:AtPLR1	0.999702
AT5G57710.1	TAS3B-5'D7[+]	3022	6	1.55692	1.40037	no	NA	TAS3B-5'D7[+]:AT5G57710.1	0.999702
AT5G59450.1	TAS3B-5'D6[+]	643	5	0.178571	1.17857	no	NA	TAS3B-5'D6[+]:AT5G59450.1	0.999702
AT5G60600.3	TAS3C-5'D9[-]	1048	5	1.13281	2.13281	no	CLB4	TAS3C-5'D9[-]:CLB4	0.999702
AT5G62390.1	TAS3B-5'D7[+]	854	4	0.379464	0.532529	no	ATBAG7	TAS3B-5'D7[+]:ATBAG7	0.999702
AT5G64420.1	TAS3A-5'D6[+]	3606	5.5	0.714286	1.71429	no	NA	TAS3A-5'D6[+]:AT5G64420.1	0.999702
AT5G64430.1	TAS4-3'D2[+]	1361	5	0.385045	0.749396	no	NA	TAS4-3'D2[+]:AT5G64430.1	0.999702
AT5G65000.2	TAS3A-5'D8[+]	678	6	0.133929	0.962122	no	NA	TAS3A-5'D8[+]:AT5G65000.2	0.999702
AT5G65220.1	TAS3B-5'D9[+]	450	6	4.69308	1.69694	no	NA	TAS3B-5'D9[+]:AT5G65220.1	0.999702
AT5G65250.1	TAS3C-5'D6[+]	393	6	0.652902	1.6529	no	NA	TAS3C-5'D6[+]:AT5G65250.1	0.999702
AT5G65390.1	TAS1A-3'D2[+]	449	6	0.0892857	0.659014	no	AGP7	TAS1A-3'D2[+]:AGP7	0.999702
AT5G66030.2	TAS3A-5'D4[+]	2108	6	0.396205	0.755435	no	ATGRIP	TAS3A-5'D4[+]:ATGRIP	0.999702
AT5G66410.1	TAS3C-5'D2[-]	873	5	1.12723	1.1011	no	PLP3b	TAS3C-5'D2[-]:PLP3b	0.999702
AT5G66760.1	TAS4-3'D2[-]	1150	5.5	0.206473	1.20647	no	SDH1-1	TAS4-3'D2[-]:SDH1-1	0.999702
AT5G67590.1	TAS3A-5'D7[+]	448	5	1.26116	0.471053	no	FRO1	TAS3A-5'D7[+]:FRO1	0.999702
ATCG00380.1	TAS3B-5'D8[+]	235	6	0.145089	0.287717	no	RPS4	TAS3B-5'D8[+]:RPS4	0.999702
ATCG00830.1	TAS3B-5'D9[+]	771	4.5	1.08259	0.295674	no	RPL2.1	TAS3B-5'D9[+]:RPL2.1	0.999702

## Sheet: Col-0 (+Xrn1) (biorep #2)
Target transcript	tasiRNA	tasiRNA slice site position in target transcript	Allen score of sRNA:target duplex	Slice site RPM	Slice site RPM + 1/Maximum adjacent site RPM + 1	Previously verified by 5' RACE?	Target gene common name	Interaction name	P-value adjusted for multiple testing
AT5G20270.1	TAS3C-5'D9[-]	1359	6	2.43694	3.43694	no	HHP1	TAS3C-5'D9[-]:HHP1	0
AT2G25930.1	TAS3C-5'D10[+]	2440	5	8.86483	9.86483	no	ELF3	TAS3C-5'D10[+]:ELF3	0.506611
AT1G05710.5	TAS3A-5'D1[+]	602	4.5	1.02422	1.12792	no	NA	TAS3A-5'D1[+]:AT1G05710.5	0.795281
AT1G10470.1	TAS1A-3'D6[+]	284	5.5	0.882951	1.88295	no	ARR4	TAS1A-3'D6[+]:ARR4	0.795281
AT1G12430.2	TAS1A-3'D3[-]	1957	5	1.39506	2.39506	no	ARK3	TAS1A-3'D3[-]:ARK3	0.795281
AT1G20970.1	TAS4-3'D8[-]	726	5.5	2.29567	3.29567	no	NA	TAS4-3'D8[-]:AT1G20970.1	0.795281
AT1G21600.2	TAS1B-3'D4[-]	285	6	1.3774	2.3774	no	PTAC6	TAS1B-3'D4[-]:PTAC6	0.795281
AT1G25400.2	TAS1B-3'D4[-]	887	4.5	1.41272	2.41272	no	NA	TAS1B-3'D4[-]:AT1G25400.2	0.795281
AT1G28230.1	TAS3C-5'D4[-]	1201	4.5	1.65995	1.57514	no	ATPUP1	TAS3C-5'D4[-]:ATPUP1	0.795281
AT1G29470.2	TAS4-3'D1[-]	1529	4	2.18972	1.04032	no	NA	TAS4-3'D1[-]:AT1G29470.2	0.795281
AT1G61215.1	TAS3C-5'D1[-]	352	4	3.1433	1.6925	no	BRD4	TAS3C-5'D1[-]:BRD4	0.795281
AT1G61350.1	TAS3B-5'D6[+]	940	5.5	0.865292	1.86529	no	NA	TAS3B-5'D6[+]:AT1G61350.1	0.795281
AT1G63700.1	TAS3A-5'D2[-]	2735	6	2.13674	3.13674	no	EMB71	TAS3A-5'D2[-]:EMB71	0.795281
AT1G67560.1	TAS2-3'D10[+]	715	6	1.96015	2.96015	no	ATLOX6	TAS2-3'D10[+]:ATLOX6	0.795281
AT1G73480.1	TAS3C-5'D3[+]	1878	5	1.74824	1.08355	no	NA	TAS3C-5'D3[+]:AT1G73480.1	0.795281
AT1G79060.1	TAS1A-3'D7[-]	1110	5.5	3.58478	4.58478	no	NA	TAS1A-3'D7[-]:AT1G79060.1	0.795281
AT2G25210.1	TAS3C-5'D4[-]	298	4	3.77903	0.65113	no	NA	TAS3C-5'D4[-]:AT2G25210.1	0.795281
AT2G34700.1	TAS2-3'D3[-]	673	4.5	1.71292	0.956419	no	NA	TAS2-3'D3[-]:AT2G34700.1	0.795281
AT2G46000.1	TAS3B-5'D6[+]	717	5	2.61353	1.3861	no	NA	TAS3B-5'D6[+]:AT2G46000.1	0.795281
AT2G46450.3	TAS3B-5'D9[+]	1127	5.5	1.34209	2.34209	no	ATCNGC12	TAS3B-5'D9[+]:ATCNGC12	0.795281
AT3G17170.1	TAS3C-5'D3[+]	905	5	1.74824	1.32305	no	RFC3	TAS3C-5'D3[+]:RFC3	0.795281
AT3G49570.1	TAS1B-3'D10[+]	470	5.5	1.80122	2.80122	no	LSU3	TAS1B-3'D10[+]:LSU3	0.795281
AT3G49800.1	TAS2-3'D1[-]	1202	4	1.14784	2.14784	no	NA	TAS2-3'D1[-]:AT3G49800.1	0.795281
AT5G33370.2	TAS3C-5'D4[-]	1300	3.5	11.2311	0.431912	no	NA	TAS3C-5'D4[-]:AT5G33370.2	0.795281
AT5G46730.2	TAS4-3'D2[-]	597	4	2.20738	0.394306	no	NA	TAS4-3'D2[-]:AT5G46730.2	0.795281
AT5G56530.2	TAS4-3'D5[-]	422	6	1.92483	2.92483	no	NA	TAS4-3'D5[-]:AT5G56530.2	0.795281
AT3G19450.1	TAS1A-3'D9[-]	1185	5.5	4.75028	1.69045	no	ATCAD4	TAS1A-3'D9[-]:ATCAD4	0.844387
AT4G07410.2	TAS1C-3'D7[-]	2686	5.5	3.58478	1.59645	no	PCN	TAS1C-3'D7[-]:PCN	0.856478
AT1G20130.2	TAS4-3'D7[+]	1746	4.5	2.73715	0.451592	no	NA	TAS4-3'D7[+]:AT1G20130.2	0.858102
AT1G50920.1	TAS4-3'D2[-]	1957	5	1.0772	0.90048	no	NA	TAS4-3'D2[-]:AT1G50920.1	0.858102
AT3G04920.1	TAS3A-5'D8[+]	255	5	1.64229	0.609166	no	NA	TAS3A-5'D8[+]:AT3G04920.1	0.858102
AT3G17998.1	TAS3A-5'D1[+]	1550	6	1.25379	2.25379	no	CPuORF30	TAS3A-5'D1[+]:CPuORF30	0.858102
AT3G18000.1	TAS3A-5'D1[+]	1550	6	1.25379	2.25379	no	NMT1	TAS3A-5'D1[+]:NMT1	0.858102
AT4G25370.1	TAS3B-5'D10[+]	775	5	1.43038	0.718204	no	NA	TAS3B-5'D10[+]:AT4G25370.1	0.858102
AT4G30440.1	TAS3B-5'D3[+]	1118	5.5	3.44351	1.43273	no	GAE1	TAS3B-5'D3[+]:GAE1	0.858102
AT4G35830.2	TAS1B-3'D7[-]	1803	6	2.50758	3.50758	no	ACO1	TAS1B-3'D7[-]:ACO1	0.858102
AT5G25560.4	TAS3A-5'D4[-]	2523	5	1.27145	1.15229	no	NA	TAS3A-5'D4[-]:AT5G25560.4	0.858102
AT5G28540.1	TAS1B-3'D4[-]	1747	5	2.66651	1.1822	no	BIP1	TAS1B-3'D4[-]:BIP1	0.858102
AT5G28640.1	TAS2-3'D3[-]	988	5	1.51868	0.979402	no	AN3	TAS2-3'D3[-]:AN3	0.858102
AT5G57710.1	TAS3B-5'D7[+]	3022	6	5.386	6.386	no	NA	TAS3B-5'D7[+]:AT5G57710.1	0.858102
ATCG00830.1	TAS3B-5'D9[+]	771	4.5	2.22504	0.293791	no	RPL2.1	TAS3B-5'D9[+]:RPL2.1	0.858102
AT1G12310.1	TAS1B-3'D2[+]	499	5.5	3.19628	1.19635	no	NA	TAS1B-3'D2[+]:AT1G12310.1	0.863038
AT3G18390.1	TAS3C-5'D9[+]	2852	6	1.41272	2.41272	no	EMB1865	TAS3C-5'D9[+]:EMB1865	0.863038
AT3G17050.1	TAS1A-3'D8[-]	39	5.5	2.0661	1.33943	no	NA	TAS1A-3'D8[-]:AT3G17050.1	0.869611
AT2G20370.1	TAS3A-5'D10[+]	2219	6	1.23613	2.23613	no	AtMUR3	TAS3A-5'D10[+]:AtMUR3	0.900593
AT4G03260.2	TAS3C-5'D2[-]	2464	6	2.03079	1.01779	no	NA	TAS3C-5'D2[-]:AT4G03260.2	0.960098
AT3G11980.1	TAS3B-5'D7[+]	1817	5.5	1.65995	0.862567	no	FAR2	TAS3B-5'D7[+]:FAR2	0.965716
AT5G26742.3	TAS3B-5'D8[+]	1802	5.5	1.35974	0.923943	no	AtRH3	TAS3B-5'D8[+]:AtRH3	0.965716
AT2G21660.2	TAS4-3'D2[-]	542	5.5	5.03282	0.609367	no	ATGRP7	TAS4-3'D2[-]:ATGRP7	0.971423
AT2G22795.1	TAS3B-5'D9[+]	1697	5.5	2.8431	0.743702	no	NA	TAS3B-5'D9[+]:AT2G22795.1	0.978073
AT3G23450.1	TAS4-3'D2[-]	317	5.5	0.264885	0.502202	no	NA	TAS4-3'D2[-]:AT3G23450.1	0.991815
AT1G07320.4	TAS1B-3'D4[-]	853	6	5.31536	0.401095	no	EMB2784	TAS1B-3'D4[-]:EMB2784	0.998827
AT1G07940.2	TAS1A-3'D8[+]	1853	6	0.918269	0.496863	no	NA	TAS1A-3'D8[+]:AT1G07940.2	0.998827
AT1G12090.1	TAS4-3'D7[+]	784	5.5	5.65088	0.491922	no	ELP	TAS4-3'D7[+]:ELP	0.998827
AT1G34030.1	TAS3C-5'D2[+]	355	6	1.83654	0.344971	no	NA	TAS3C-5'D2[+]:AT1G34030.1	0.998827
AT1G44760.1	TAS1A-3'D8[-]	386	6	2.03079	0.753986	no	NA	TAS1A-3'D8[-]:AT1G44760.1	0.998827
AT2G18020.1	TAS3C-5'D10[-]	425	6	2.08376	0.445903	no	EMB2296	TAS3C-5'D10[-]:EMB2296	0.998827
AT2G30570.1	TAS3B-5'D7[+]	263	6	4.14987	0.249975	no	PSBW	TAS3B-5'D7[+]:PSBW	0.998827
AT2G36160.1	TAS1B-3'D4[-]	536	5.5	1.25379	0.440662	no	NA	TAS1B-3'D4[-]:AT2G36160.1	0.998827
AT3G23450.1	TAS4-3'D4[+]	300	5.5	0.141272	0.453123	no	NA	TAS4-3'D4[+]:AT3G23450.1	0.998827
AT4G04640.1	TAS4-3'D9[-]	1325	6	0.847633	0.501506	no	ATPC1	TAS4-3'D9[-]:ATPC1	0.998827
AT5G18520.1	TAS4-3'D9[+]	1334	6	1.55399	0.867969	no	Cand7	TAS4-3'D9[+]:Cand7	0.998827
AT5G52470.2	TAS1A-3'D9[-]	188	6	2.01313	0.743064	no	ATFBR1	TAS1A-3'D9[-]:ATFBR1	0.998827
AT5G52920.1	TAS4-3'D1[-]	1531	6	1.83654	0.748404	no	PKP-BETA1	TAS4-3'D1[-]:PKP-BETA1	0.998827
AT5G53880.1	TAS3B-5'D9[+]	241	6	2.48992	1.01022	no	NA	TAS3B-5'D9[+]:AT5G53880.1	0.998827
AT5G58590.1	TAS3C-5'D3[+]	711	6	1.43038	0.774811	no	RANBP1	TAS3C-5'D3[+]:RANBP1	0.998827

## Sheet: Col-0 (+Xrn1) (biorep #3)
Target transcript	tasiRNA	tasiRNA slice site position in target transcript	Allen score of sRNA:target duplex	Slice site RPM	Slice site RPM + 1/Maximum adjacent site RPM + 1	Previously verified by 5' RACE?	Target gene common name	Interaction name	P-value adjusted for multiple testing
AT5G60450.1	TAS3C-5'D5[+]	1885	1	0.474484	0.918466	yes	ARF4	TAS3C-5'D5[+]:ARF4	0
AT5G58670.1	TAS4-3'D7[-]	1918	2.5	0.188158	1.18816	no	ATPLC	TAS4-3'D7[-]:ATPLC	0.493153
AT5G18040.1	TAS1A-3'D2[+]	685	2	0.171796	1.1718	yes	NA	TAS1A-3'D2[+]:AT5G18040.1	0.515508
AT1G15390.1	TAS3C-5'D3[+]	248	5.5	2.07791	3.07791	no	ATDEF1	TAS3C-5'D3[+]:ATDEF1	0.687951
AT1G48710.1	TAS3C-5'D3[+]	609	5	1.5298	2.50927	no	NA	TAS3C-5'D3[+]:AT1G48710.1	0.687951
AT1G70690.1	TAS3B-5'D1[+]	863	4.5	0.728088	1.72809	no	HWI1	TAS3B-5'D1[+]:HWI1	0.687951
AT2G22800.1	TAS3A-5'D6[+]	676	3.5	0.850799	1.04624	no	HAT9	TAS3A-5'D6[+]:HAT9	0.687951
AT2G25930.1	TAS3C-5'D10[+]	2440	5	11.8212	5.82102	no	ELF3	TAS3C-5'D10[+]:ELF3	0.687951
AT2G31390.1	TAS2-3'D9[-]	1144	4	4.85119	2.00775	no	NA	TAS2-3'D9[-]:AT2G31390.1	0.687951
AT2G44730.1	TAS3C-5'D6[+]	1200	5.5	2.46241	3.46241	no	NA	TAS3C-5'D6[+]:AT2G44730.1	0.687951
AT2G45740.3	TAS2-3'D3[+]	991	5.5	2.40514	2.68129	no	PEX11D	TAS2-3'D3[+]:PEX11D	0.687951
AT4G24100.1	TAS3C-5'D2[-]	2625	4	1.09622	2.09622	no	NA	TAS3C-5'D2[-]:AT4G24100.1	0.687951
AT4G29950.2	TAS1C-3'D5[-]	712	5.5	1.90612	2.90612	no	NA	TAS1C-3'D5[-]:AT4G29950.2	0.687951
AT5G67490.1	TAS3C-5'D3[+]	693	5	3.04324	2.2751	no	NA	TAS3C-5'D3[+]:AT5G67490.1	0.687951
AT1G49540.2	TAS3B-5'D7[-]	2094	5.5	1.59525	2.59525	no	AtELP2	TAS3B-5'D7[-]:AtELP2	0.693202
AT1G49540.2	TAS3B-5'D3[+]	672	5	0.75263	1.75263	no	AtELP2	TAS3B-5'D3[+]:AtELP2	0.693202
AT1G70820.1	TAS3B-5'D1[+]	1605	4.5	2.18426	1.58719	no	NA	TAS3B-5'D1[+]:AT1G70820.1	0.693202
AT5G08590.1	TAS1C-3'D6[-]	899	3.5	0.867161	0.518443	no	ASK2	TAS1C-3'D6[-]:ASK2	0.693202
AT5G54650.2	TAS3C-5'D10[+]	2561	5.5	2.72419	2.87692	no	ATFH5	TAS3C-5'D10[+]:ATFH5	0.702693
AT1G67560.1	TAS2-3'D10[+]	715	6	5.53838	4.56088	no	ATLOX6	TAS2-3'D10[+]:ATLOX6	0.850325
AT4G32010.1	TAS1A-3'D3[-]	3246	5	1.7425	2.7425	no	HSI2-L1	TAS1A-3'D3[-]:HSI2-L1	0.850325
AT4G34390.1	TAS3C-5'D3[+]	1028	5	1.60343	2.60343	no	XLG2	TAS3C-5'D3[+]:XLG2	0.850325
AT5G57710.1	TAS3B-5'D7[+]	3022	6	6.87184	3.36168	no	NA	TAS3B-5'D7[+]:AT5G57710.1	0.850325
AT5G06560.1	TAS3C-5'D9[+]	1964	4	0.474484	1.47448	no	NA	TAS3C-5'D9[+]:AT5G06560.1	0.867714
AT1G31540.2	TAS1A-3'D3[-]	412	3.5	0.4254	0.506156	no	NA	TAS1A-3'D3[-]:AT1G31540.2	0.936613
AT3G11980.1	TAS3B-5'D7[+]	1817	5.5	1.29256	2.29256	no	FAR2	TAS3B-5'D7[+]:FAR2	0.936613
AT4G18030.1	TAS1C-3'D7[-]	1758	4	0.883522	0.74938	no	NA	TAS1C-3'D7[-]:AT4G18030.1	0.936613
AT5G07030.1	TAS1A-3'D2[+]	965	4	0.768992	0.830922	no	NA	TAS1A-3'D2[+]:AT5G07030.1	0.936613
AT5G46730.2	TAS4-3'D2[-]	597	4	0.335411	0.427058	no	NA	TAS4-3'D2[-]:AT5G46730.2	0.936613
AT5G56150.2	TAS1B-3'D10[+]	713	5.5	1.40709	2.40709	no	UBC30	TAS1B-3'D10[+]:UBC30	0.936613
AT3G09070.1	TAS3A-5'D1[+]	1923	5.5	1.03078	1.96643	no	OPS	TAS3A-5'D1[+]:OPS	0.955344
AT5G45630.1	TAS3B-5'D9[+]	164	4.5	0.253604	1.2536	no	NA	TAS3B-5'D9[+]:AT5G45630.1	0.955344
AT1G11910.1	TAS4-3'D7[-]	1668	5	4.80211	1.80358	no	APA1	TAS4-3'D7[-]:APA1	0.974553
AT1G14380.3	TAS3C-5'D3[+]	1380	5	0.654461	1.65446	no	IQD28	TAS3C-5'D3[+]:IQD28	0.974553
AT1G34350.2	TAS3C-5'D8[+]	786	5.5	2.1679	1.86857	no	NA	TAS3C-5'D8[+]:AT1G34350.2	0.974553
AT1G79250.2	TAS4-3'D2[-]	1270	4.5	0.564473	0.876282	no	AGC1.7	TAS4-3'D2[-]:AGC1.7	0.974553
AT1G79400.1	TAS1B-3'D7[-]	2232	6	1.25166	2.25166	no	ATCHX2	TAS1B-3'D7[-]:ATCHX2	0.974553
AT3G54340.1	TAS2-3'D3[+]	496	4.5	1.84885	1.20816	no	AP3	TAS2-3'D3[+]:AP3	0.974553
AT4G18480.1	TAS3B-5'D3[+]	949	4.5	1.25984	1.06148	no	CH-42	TAS3B-5'D3[+]:CH-42	0.974553
AT5G16680.1	TAS1B-3'D4[-]	193	6	1.16985	2.16985	no	NA	TAS1B-3'D4[-]:AT5G16680.1	0.974553
AT5G65770.3	TAS2-3'D5[+]	3058	5	1.0635	1.51733	no	CRWN4	TAS2-3'D5[+]:CRWN4	0.974553
AT5G65780.2	TAS2-3'D5[+]	3082	5	1.0635	1.51733	no	ATBCAT-5	TAS2-3'D5[+]:ATBCAT-5	0.974553
AT4G15802.1	TAS3A-5'D9[-]	529	3.5	0.220881	0.487327	no	AtHSBP	TAS3A-5'D9[-]:AtHSBP	0.99498
AT5G64170.2	TAS3B-5'D9[+]	1869	5	1.05532	1.4017	no	NA	TAS3B-5'D9[+]:AT5G64170.2	0.99498
AT1G01630.1	TAS3C-5'D9[+]	856	5.5	0.490846	0.551838	no	NA	TAS3C-5'D9[+]:AT1G01630.1	0.999904
AT1G02000.1	TAS4-3'D10[-]	1389	6	0.237242	0.250295	no	GAE2	TAS4-3'D10[-]:GAE2	0.999904
AT1G03440.1	TAS3C-5'D3[+]	308	5.5	0.75263	0.241194	no	NA	TAS3C-5'D3[+]:AT1G03440.1	0.999904
AT1G05490.1	TAS3A-5'D2[+]	3404	6	0.523569	1.05674	no	chr31	TAS3A-5'D2[+]:chr31	0.999904
AT1G07320.4	TAS1B-3'D4[-]	853	6	5.28477	0.164497	no	EMB2784	TAS1B-3'D4[-]:EMB2784	0.999904
AT1G07350.2	TAS3C-5'D9[-]	352	5	0.163615	1.16362	no	SR45a	TAS3C-5'D9[-]:SR45a	0.999904
AT1G10670.4	TAS4-3'D4[+]	690	5.5	0.589015	0.495204	no	ACLA-1	TAS4-3'D4[+]:ACLA-1	0.999904
AT1G12090.1	TAS4-3'D7[+]	784	5.5	1.55434	0.774326	no	ELP	TAS4-3'D7[+]:ELP	0.999904
AT1G15270.1	TAS3B-5'D9[+]	207	6	1.11258	0.307338	no	NA	TAS3B-5'D9[+]:AT1G15270.1	0.999904
AT1G20440.1	TAS3C-5'D3[+]	485	5.5	1.32528	0.873939	no	AtCOR47	TAS3C-5'D3[+]:AtCOR47	0.999904
AT1G20610.1	TAS3C-5'D8[-]	256	6	0.302688	1.30269	no	CYCB2;3	TAS3C-5'D8[-]:CYCB2;3	0.999904
AT1G22640.1	TAS2-3'D9[+]	476	5.5	0.948968	1.33663	no	ATMYB3	TAS2-3'D9[+]:ATMYB3	0.999904
AT1G23190.1	TAS3C-5'D9[+]	1230	5	0.605376	0.859795	no	PGM3	TAS3C-5'D9[+]:PGM3	0.999904
AT1G27752.2	TAS4-3'D4[+]	2675	4.5	0.204519	0.184223	no	NA	TAS4-3'D4[+]:AT1G27752.2	0.999904
AT1G30620.3	TAS3A-5'D4[+]	1706	5.5	0.613557	0.550578	no	HSR8	TAS3A-5'D4[+]:HSR8	0.999904
AT1G33970.5	TAS3B-5'D9[+]	888	5	0.53993	0.584159	no	NA	TAS3B-5'D9[+]:AT1G33970.5	0.999904
AT1G34030.1	TAS3C-5'D2[+]	355	6	0.343592	0.430801	no	NA	TAS3C-5'D2[+]:AT1G34030.1	0.999904
AT1G44170.3	TAS4-3'D9[+]	870	6	1.9552	0.813162	no	ALDH3H1	TAS4-3'D9[+]:ALDH3H1	0.999904
AT1G50750.1	TAS1A-3'D7[-]	2254	6	0.261784	1.26178	no	NA	TAS1A-3'D7[-]:AT1G50750.1	0.999904
AT1G53910.3	TAS3C-5'D9[+]	805	6	0.589015	0.482894	no	RAP2.12	TAS3C-5'D9[+]:RAP2.12	0.999904
AT1G56070.1	TAS1C-3'D6[-]	2382	5	1.16167	0.391326	no	LOS1	TAS1C-3'D6[-]:LOS1	0.999904
AT1G57720.2	TAS3B-5'D8[+]	1181	6	0.654461	0.420246	no	NA	TAS3B-5'D8[+]:AT1G57720.2	0.999904
AT1G60710.1	TAS3B-5'D5[+]	150	6	0.53175	0.518324	no	ATB2	TAS3B-5'D5[+]:ATB2	0.999904
AT1G61350.1	TAS3B-5'D6[+]	940	5.5	0.171796	0.644525	no	NA	TAS3B-5'D6[+]:AT1G61350.1	0.999904
AT1G65440.3	TAS1B-3'D4[-]	4568	5.5	0.826257	0.829148	no	GTB1	TAS1B-3'D4[-]:GTB1	0.999904
AT1G65960.2	TAS3B-5'D6[+]	1452	6	0.75263	0.383089	no	GAD2	TAS3B-5'D6[+]:GAD2	0.999904
AT1G66400.1	TAS1A-3'D3[+]	638	4.5	0.130892	0.405107	no	CML23	TAS1A-3'D3[+]:CML23	0.999904
AT1G66580.1	TAS3B-5'D7[-]	767	4	1.21893	0.329077	no	RPL10C	TAS3B-5'D7[-]:RPL10C	0.999904
AT1G70700.2	TAS1C-3'D5[-]	1014	6	5.12934	0.757389	no	JAZ9	TAS1C-3'D5[-]:JAZ9	0.999904
AT1G73220.1	TAS3C-5'D7[-]	714	6	0.507207	1.10828	no	AtOCT1	TAS3C-5'D7[-]:AtOCT1	0.999904
AT1G75550.1	TAS3A-5'D1[+]	289	6	0.0572653	0.600442	no	NA	TAS3A-5'D1[+]:AT1G75550.1	0.999904
AT1G75940.1	TAS2-3'D3[+]	1613	6	1.45618	0.293995	no	ATA27	TAS2-3'D3[+]:ATA27	0.999904
AT1G75950.1	TAS4-3'D4[+]	215	6	0.368134	0.405683	no	ASK1	TAS4-3'D4[+]:ASK1	0.999904
AT1G77590.1	TAS2-3'D8[-]	1691	5.5	0.899884	0.513531	no	LACS9	TAS2-3'D8[-]:LACS9	0.999904
AT1G80840.1	TAS1C-3'D2[+]	221	5.5	0.359954	0.564978	no	ATWRKY40	TAS1C-3'D2[+]:ATWRKY40	0.999904
AT2G01250.2	TAS3B-5'D7[+]	156	5.5	0.768992	0.399525	no	NA	TAS3B-5'D7[+]:AT2G01250.2	0.999904
AT2G03680.2	TAS4-3'D2[-]	310	5.5	0.261784	0.554338	no	SKU6	TAS4-3'D2[-]:SKU6	0.999904
AT2G04030.2	TAS1B-3'D10[+]	1259	6	0.572653	0.646748	no	AtHsp90.5	TAS1B-3'D10[+]:AtHsp90.5	0.999904
AT2G04630.1	TAS3C-5'D3[+]	171	6	0.883522	1.42794	no	NRPB6B	TAS3C-5'D3[+]:NRPB6B	0.999904
AT2G17420.1	TAS2-3'D2[-]	462	5.5	0.384496	0.565564	no	ATNTRA	TAS2-3'D2[-]:ATNTRA	0.999904
AT2G24360.1	TAS3C-5'D3[+]	1643	6	0.482665	0.701827	no	NA	TAS3C-5'D3[+]:AT2G24360.1	0.999904
AT2G25210.1	TAS3C-5'D4[-]	298	4	0.376315	0.269078	no	NA	TAS3C-5'D4[-]:AT2G25210.1	0.999904
AT2G26800.3	TAS2-3'D4[+]	1037	6	0.4254	1.4254	no	NA	TAS2-3'D4[+]:AT2G26800.3	0.999904
AT2G30570.1	TAS3B-5'D7[+]	263	6	0.687184	0.0825865	no	PSBW	TAS3B-5'D7[+]:PSBW	0.999904
AT2G32260.1	TAS3A-5'D6[+]	1248	5.5	0.43358	0.902182	no	ATCCT1	TAS3A-5'D6[+]:ATCCT1	0.999904
AT2G33860.1	TAS3C-5'D2[-]	2212	4.5	0.989872	1.32024	yes	ARF3	TAS3C-5'D2[-]:ARF3	0.999904
AT2G38800.1	TAS3C-5'D2[+]	1451	5.5	1.78341	0.6983	no	NA	TAS3C-5'D2[+]:AT2G38800.1	0.999904
AT2G39470.3	TAS3C-5'D3[+]	749	5.5	1.16985	0.526018	no	PnsL1	TAS3C-5'D3[+]:PnsL1	0.999904
AT2G39660.1	TAS3B-5'D8[+]	591	6	0.556292	1.55629	no	BIK1	TAS3B-5'D8[+]:BIK1	0.999904
AT2G39730.3	TAS2-3'D8[-]	283	5	0.482665	0.3361	no	RCA	TAS2-3'D8[-]:RCA	0.999904
AT2G40205.1	TAS3B-5'D9[-]	105	4	0.728088	0.635803	no	NA	TAS3B-5'D9[-]:AT2G40205.1	0.999904
AT2G41800.1	TAS2-3'D5[+]	323	6	0.499026	1.49903	no	NA	TAS2-3'D5[+]:AT2G41800.1	0.999904
AT2G42010.1	TAS3B-5'D1[+]	3511	5	1.01441	0.699064	no	PLDBETA	TAS3B-5'D1[+]:PLDBETA	0.999904
AT2G43760.3	TAS3C-5'D9[+]	549	5.5	0.179977	0.32036	no	NA	TAS3C-5'D9[+]:AT2G43760.3	0.999904
AT2G46020.2	TAS3B-5'D1[+]	5231	5	1.18621	0.933623	no	ATBRM	TAS3B-5'D1[+]:ATBRM	0.999904
AT3G02080.1	TAS1C-3'D7[-]	447	5	4.35217	0.921154	no	NA	TAS1C-3'D7[-]:AT3G02080.1	0.999904
AT3G02400.1	TAS3C-5'D5[+]	1514	6	0.351773	1.35177	no	NA	TAS3C-5'D5[+]:AT3G02400.1	0.999904
AT3G02540.3	TAS1A-3'D9[-]	1330	5.5	0.989872	0.880537	no	RAD23-3	TAS1A-3'D9[-]:RAD23-3	0.999904
AT3G03920.1	TAS3A-5'D5[+]	92	5.5	0.43358	0.485104	no	NA	TAS3A-5'D5[+]:AT3G03920.1	0.999904
AT3G04400.2	TAS3C-5'D8[+]	574	5.5	0.53175	0.138056	no	emb2171	TAS3C-5'D8[+]:emb2171	0.999904
AT3G05530.1	TAS3C-5'D3[+]	311	5.5	1.03896	0.99204	no	ATS6A.2	TAS3C-5'D3[+]:ATS6A.2	0.999904
AT3G07460.2	TAS3A-5'D4[-]	963	6	0.229061	0.507153	no	NA	TAS3A-5'D4[-]:AT3G07460.2	0.999904
AT3G08530.1	TAS1B-3'D8[-]	4613	6	0.32723	0.618666	no	NA	TAS1B-3'D8[-]:AT3G08530.1	0.999904
AT3G08720.2	TAS4-3'D2[-]	1400	6	0.0736269	0.789458	no	ATPK19	TAS4-3'D2[-]:ATPK19	0.999904
AT3G09860.1	TAS3A-5'D4[-]	455	4	0.294507	0.488031	no	NA	TAS3A-5'D4[-]:AT3G09860.1	0.999904
AT3G09980.1	TAS1B-3'D9[-]	260	5.5	0.842618	0.59236	no	NA	TAS1B-3'D9[-]:AT3G09980.1	0.999904
AT3G10570.1	TAS4-3'D9[+]	1554	6	2.78146	0.96052	no	CYP77A6	TAS4-3'D9[+]:CYP77A6	0.999904
AT3G18390.1	TAS3C-5'D9[+]	2852	6	0.662642	1.66264	no	EMB1865	TAS3C-5'D9[+]:EMB1865	0.999904
AT3G19450.1	TAS1A-3'D9[-]	1185	5.5	0.695365	1.69537	no	ATCAD4	TAS1A-3'D9[-]:ATCAD4	0.999904
AT3G22380.2	TAS3B-5'D9[+]	3611	6	1.34164	1.00704	no	TIC	TAS3B-5'D9[+]:TIC	0.999904
AT3G23450.1	TAS4-3'D4[+]	300	5.5	0.00818076	0.609371	no	NA	TAS4-3'D4[+]:AT3G23450.1	0.999904
AT3G23450.1	TAS4-3'D2[-]	317	5.5	0.032723	0.502463	no	NA	TAS4-3'D2[-]:AT3G23450.1	0.999904
AT3G24080.2	TAS3C-5'D3[+]	1027	6	1.36619	1.7295	no	NA	TAS3C-5'D3[+]:AT3G24080.2	0.999904
AT3G26030.1	TAS3A-5'D2[+]	1451	4.5	0.188158	0.633569	no	ATB' DELTA	TAS3A-5'D2[+]:ATB' DELTA	0.999904
AT3G26110.1	TAS1B-3'D10[-]	528	5.5	3.51773	0.890365	no	NA	TAS1B-3'D10[-]:AT3G26110.1	0.999904
AT3G44340.2	TAS3B-5'D7[+]	3649	6	0.171796	0.627582	no	CEF	TAS3B-5'D7[+]:CEF	0.999904
AT3G46430.1	TAS3C-5'D3[+]	86	6	2.02883	1.00271	no	NA	TAS3C-5'D3[+]:AT3G46430.1	0.999904
AT3G51550.1	TAS2-3'D3[-]	2979	6	2.99416	1.46075	no	FER	TAS2-3'D3[-]:FER	0.999904
AT3G52300.2	TAS3B-5'D5[+]	377	6	0.572653	0.363235	no	ATPQ	TAS3B-5'D5[+]:ATPQ	0.999904
AT3G55520.1	TAS3B-5'D9[+]	766	6	0.196338	0.445524	no	NA	TAS3B-5'D9[+]:AT3G55520.1	0.999904
AT3G60750.2	TAS3B-5'D7[+]	2144	5.5	0.670822	0.317515	no	NA	TAS3B-5'D7[+]:AT3G60750.2	0.999904
AT3G62600.1	TAS3A-5'D1[+]	480	6	0.703546	0.181197	no	ATERDJ3B	TAS3A-5'D1[+]:ATERDJ3B	0.999904
AT4G00830.4	TAS3C-5'D3[+]	475	5.5	0.0409038	0.472586	no	LIF2	TAS3C-5'D3[+]:LIF2	0.999904
AT4G02530.1	TAS3B-5'D9[+]	298	6	0.179977	0.400397	no	NA	TAS3B-5'D9[+]:AT4G02530.1	0.999904
AT4G03290.1	TAS3A-5'D1[+]	407	5	0.376315	0.269942	no	NA	TAS3A-5'D1[+]:AT4G03290.1	0.999904
AT4G07410.2	TAS1C-3'D7[-]	2686	5.5	1.71796	1.133	no	PCN	TAS1C-3'D7[-]:PCN	0.999904
AT4G11560.1	TAS1A-3'D7[-]	1693	6	1.86521	0.83942	no	NA	TAS1A-3'D7[-]:AT4G11560.1	0.999904
AT4G13670.1	TAS1B-3'D4[-]	511	6	3.2723	0.0842831	no	PTAC5	TAS1B-3'D4[-]:PTAC5	0.999904
AT4G28310.1	TAS3C-5'D9[+]	560	6	0.768992	1.76899	no	NA	TAS3C-5'D9[+]:AT4G28310.1	0.999904
AT4G29060.2	TAS4-3'D4[+]	1144	6	0.867161	0.552316	no	emb2726	TAS4-3'D4[+]:emb2726	0.999904
AT4G30440.1	TAS3B-5'D3[+]	1118	5.5	1.12895	0.966575	no	GAE1	TAS3B-5'D3[+]:GAE1	0.999904
AT4G31290.1	TAS4-3'D10[-]	387	5	0.695365	0.729101	no	NA	TAS4-3'D10[-]:AT4G31290.1	0.999904
AT4G31300.3	TAS3B-5'D1[+]	411	5	0.4254	0.510605	no	PBA1	TAS3B-5'D1[+]:PBA1	0.999904
AT4G32410.1	TAS1B-3'D4[-]	3035	6	0.458123	0.787834	no	AtCESA1	TAS1B-3'D4[-]:AtCESA1	0.999904
AT4G35110.4	TAS1B-3'D4[-]	1131	5.5	0.4254	0.58817	no	NA	TAS1B-3'D4[-]:AT4G35110.4	0.999904
AT4G36700.1	TAS3B-5'D7[+]	1451	5.5	0.507207	0.766898	no	NA	TAS3B-5'D7[+]:AT4G36700.1	0.999904
AT4G39820.1	TAS3B-5'D3[+]	1312	6	0.899884	1.89988	no	NA	TAS3B-5'D3[+]:AT4G39820.1	0.999904
AT5G01090.1	TAS3C-5'D8[-]	1277	5	1.34164	0.457075	no	NA	TAS3C-5'D8[-]:AT5G01090.1	0.999904
AT5G01410.1	TAS1C-3'D7[-]	1134	4.5	0.335411	0.324375	no	ATPDX1	TAS1C-3'D7[-]:ATPDX1	0.999904
AT5G02120.1	TAS2-3'D5[+]	339	6	0.940788	0.421953	no	OHP	TAS2-3'D5[+]:OHP	0.999904
AT5G02800.1	TAS3C-5'D9[+]	1335	5.5	0.294507	1.29451	no	CDL1	TAS3C-5'D9[+]:CDL1	0.999904
AT5G07530.2	TAS3C-5'D3[+]	165	5.5	1.13713	0.458122	no	ATGRP-7	TAS3C-5'D3[+]:ATGRP-7	0.999904
AT5G07530.2	TAS3B-5'D6[+]	635	5.5	1.78341	0.000922471	no	ATGRP-7	TAS3B-5'D6[+]:ATGRP-7	0.999904
AT5G09810.1	TAS1C-3'D5[+]	1319	5.5	0.53993	0.221395	no	ACT7	TAS1C-3'D5[+]:ACT7	0.999904
AT5G13610.1	TAS1B-3'D4[-]	884	4	0.376315	0.498871	no	NA	TAS1B-3'D4[-]:AT5G13610.1	0.999904
AT5G13850.1	TAS3B-5'D7[+]	572	5.5	0.515388	0.431551	no	NACA3	TAS3B-5'D7[+]:NACA3	0.999904
AT5G17910.2	TAS3C-5'D3[+]	1244	6	0.0163615	0.751873	no	NA	TAS3C-5'D3[+]:AT5G17910.2	0.999904
AT5G19990.1	TAS3B-5'D6[+]	963	4.5	0.171796	0.215968	no	ATSUG1	TAS3B-5'D6[+]:ATSUG1	0.999904
AT5G20190.1	TAS1A-3'D6[+]	644	5.5	0.261784	0.594968	no	NA	TAS1A-3'D6[+]:AT5G20190.1	0.999904
AT5G21930.3	TAS2-3'D4[+]	2318	6	0.948968	1.94897	no	ATHMA8	TAS2-3'D4[+]:ATHMA8	0.999904
AT5G22580.1	TAS3C-5'D3[+]	170	6	0.973511	0.267972	no	NA	TAS3C-5'D3[+]:AT5G22580.1	0.999904
AT5G22730.1	TAS1C-3'D9[+]	1635	6	0.0572653	1.05727	no	NA	TAS1C-3'D9[+]:AT5G22730.1	0.999904
AT5G28540.1	TAS1B-3'D4[-]	1747	5	0.458123	0.791332	no	BIP1	TAS1B-3'D4[-]:BIP1	0.999904
AT5G33370.2	TAS3C-5'D4[-]	1300	3.5	8.57344	0.62538	no	NA	TAS3C-5'D4[-]:AT5G33370.2	0.999904
AT5G35630.3	TAS2-3'D4[+]	1421	6	0.580834	0.254181	no	ATGSL1	TAS2-3'D4[+]:ATGSL1	0.999904
AT5G47120.1	TAS3C-5'D3[+]	773	6	1.87339	1.21017	no	ATBI-1	TAS3C-5'D3[+]:ATBI-1	0.999904
AT5G48020.1	TAS1C-3'D2[+]	844	6	1.20257	1.11607	no	NA	TAS1C-3'D2[+]:AT5G48020.1	0.999904
AT5G48655.3	TAS4-3'D3[+]	801	5.5	0.826257	1.17967	no	NA	TAS4-3'D3[+]:AT5G48655.3	0.999904
AT5G51750.1	TAS4-3'D8[+]	2478	6	1.0226	0.391672	no	ATSBT1.3	TAS4-3'D8[+]:ATSBT1.3	0.999904
AT5G52650.1	TAS3B-5'D7[+]	528	6	0.335411	0.174728	no	NA	TAS3B-5'D7[+]:AT5G52650.1	0.999904
AT5G52920.1	TAS3C-5'D4[+]	629	6	0.368134	1.36813	no	PKP-BETA1	TAS3C-5'D4[+]:PKP-BETA1	0.999904
AT5G56950.1	TAS3C-5'D3[+]	1132	6	0.368134	0.687549	no	NAP1;3	TAS3C-5'D3[+]:NAP1;3	0.999904
AT5G59130.2	TAS3A-5'D4[-]	1402	5	0.4254	1.4254	no	NA	TAS3A-5'D4[-]:AT5G59130.2	0.999904
AT5G62000.4	TAS1B-3'D10[+]	3081	5	1.88976	0.550011	no	ARF1-BP	TAS1B-3'D10[+]:ARF1-BP	0.999904
AT5G62390.1	TAS3C-5'D3[+]	850	4.5	0.368134	0.625802	no	ATBAG7	TAS3C-5'D3[+]:ATBAG7	0.999904
AT5G66210.4	TAS3C-5'D5[+]	1846	6	0.139073	0.390856	no	CPK28	TAS3C-5'D5[+]:CPK28	0.999904
AT5G66400.2	TAS3A-5'D1[+]	453	6	0.0409038	0.721967	no	ATDI8	TAS3A-5'D1[+]:ATDI8	0.999904
AT5G67590.1	TAS3A-5'D7[+]	448	5	0.670822	0.383734	no	FRO1	TAS3A-5'D7[+]:FRO1	0.999904
ATCG00170.1	TAS2-3'D8[-]	562	6	0.31905	0.411071	no	RPOC2	TAS2-3'D8[-]:RPOC2	0.999904
ATCG00380.1	TAS3B-5'D8[+]	235	6	1.69342	0.478379	no	RPS4	TAS3B-5'D8[+]:RPS4	0.999904
ATCG00830.1	TAS3B-5'D9[+]	771	4.5	0.53175	0.192783	no	RPL2.1	TAS3B-5'D9[+]:RPL2.1	0.999904

## Sheet: xrn4 (biorep #1)
Target transcript	tasiRNA	tasiRNA slice site position in target transcript	Allen score of sRNA:target duplex	Slice site RPM	Slice site RPM + 1/Maximum adjacent site RPM + 1	Previously verified by 5' RACE?	Target gene common name	Interaction name	P-value adjusted for multiple testing
AT2G33860.1	TAS3C-5'D5[+]	1685	1.5	3.32678	3.1505	yes	ARF3	TAS3C-5'D5[+]:ARF3	0
AT2G33860.1	TAS3C-5'D5[+]	1805	1	1.21104	1.2834	yes	ARF3	TAS3C-5'D5[+]:ARF3	0
AT4G16510.1	TAS2-3'D9[-]	629	5.5	3.14488	4.14488	no	NA	TAS2-3'D9[-]:AT4G16510.1	0
AT5G18040.1	TAS1A-3'D2[+]	685	2	10.9808	8.45836	yes	NA	TAS1A-3'D2[+]:AT5G18040.1	0
AT5G60450.1	TAS3C-5'D5[+]	1885	1	0.287204	1.2872	yes	ARF4	TAS3C-5'D5[+]:ARF4	0
AT5G60450.1	TAS3A-5'D7[+]	2094	1.5	2.43644	1.54751	yes	ARF4	TAS3A-5'D7[+]:ARF4	0
AT5G62000.4	TAS3A-5'D7[+]	1745	1.5	3.59005	1.82681	yes	ARF1-BP	TAS3A-5'D7[+]:ARF1-BP	0
AT4G29770.2	TAS1A-3'D6[+]	780	3	1.2254	2.2254	yes	NA	TAS1A-3'D6[+]:AT4G29770.2	0.0458692
AT4G29760.1	TAS1A-3'D6[+]	630	3	0.617488	1.61749	no	NA	TAS1A-3'D6[+]:AT4G29760.1	0.103457
AT5G18065.1	TAS1A-3'D2[+]	736	2	1.16317	0.969949	no	NA	TAS1A-3'D2[+]:AT5G18065.1	0.103457
AT2G44680.2	TAS1A-3'D5[-]	1254	3	1.89554	1.64417	no	CKB4	TAS1A-3'D5[-]:CKB4	0.3088
AT1G51670.1	TAS1A-3'D6[+]	536	3.5	0.435592	1.43559	no	NA	TAS1A-3'D6[+]:AT1G51670.1	0.327515
AT3G10010.1	TAS3C-5'D8[-]	2394	6	2.57526	3.57526	no	DML2	TAS3C-5'D8[-]:DML2	0.336487
AT2G25930.1	TAS3C-5'D10[+]	2440	5	4.29848	2.64867	no	ELF3	TAS3C-5'D10[+]:ELF3	0.369223
AT5G40040.1	TAS1C-3'D7[-]	59	5	1.21104	2.21104	no	NA	TAS1C-3'D7[-]:AT5G40040.1	0.456432
AT2G16750.1	TAS3C-5'D3[+]	1998	4.5	2.86246	1.63371	no	NA	TAS3C-5'D3[+]:AT2G16750.1	0.55849
AT5G58220.3	TAS3B-5'D10[+]	428	5.5	2.14445	3.14445	no	ALNS	TAS3B-5'D10[+]:ALNS	0.577117
AT4G09730.1	TAS1A-3'D7[+]	164	4	0.387725	1.38773	no	RH39	TAS1A-3'D7[+]:RH39	0.63598
AT2G39675.1	TAS1A-3'D10[-]	492	3	0.378151	0.578239	no	TAS1c	TAS1A-3'D10[-]:TAS1c	0.647619
AT1G47200.1	TAS3B-5'D7[+]	622	5	3.71929	1.75457	no	WPP2	TAS3B-5'D7[+]:WPP2	0.655629
AT2G46020.2	TAS1B-3'D7[-]	4939	4	0.406872	1.02798	no	ATBRM	TAS1B-3'D7[-]:ATBRM	0.655629
AT4G16340.1	TAS3B-5'D7[+]	5142	6	1.95777	2.31504	no	SPK1	TAS3B-5'D7[+]:SPK1	0.655629
AT4G31340.2	TAS3C-5'D4[-]	1692	2	1.16317	0.531089	no	NA	TAS3C-5'D4[-]:AT4G31340.2	0.655629
AT1G12390.1	TAS1B-3'D7[-]	251	4.5	0.80417	1.80417	no	NA	TAS1B-3'D7[-]:AT1G12390.1	0.656294
AT2G31390.1	TAS2-3'D9[-]	1144	4	0.852037	1.46053	no	NA	TAS2-3'D9[-]:AT2G31390.1	0.672526
AT4G37510.1	TAS3C-5'D1[+]	1198	6	1.99607	2.99607	no	NA	TAS3C-5'D1[+]:AT4G37510.1	0.672526
AT3G47290.1	TAS1C-3'D9[+]	693	5.5	0.995639	1.99564	no	ATPLC8	TAS1C-3'D9[+]:ATPLC8	0.684488
ATCG01040.1	TAS1B-3'D9[+]	199	3.5	0.392512	0.0610272	no	YCF5	TAS1B-3'D9[+]:YCF5	0.747618
AT3G56230.1	TAS3C-5'D1[+]	112	5.5	0.933412	1.93341	no	NA	TAS3C-5'D1[+]:AT3G56230.1	0.780151
AT3G61415.2	TAS1B-3'D4[-]	1188	6	1.00521	2.00521	no	ASK21	TAS1B-3'D4[-]:ASK21	0.780151
AT1G27752.2	TAS4-3'D4[+]	2675	4.5	0.650995	0.817498	no	NA	TAS4-3'D4[+]:AT1G27752.2	0.899704
AT2G35880.1	TAS1A-3'D9[-]	640	6	1.01479	2.01479	no	NA	TAS1A-3'D9[-]:AT2G35880.1	0.899704
AT3G53270.6	TAS4-3'D3[+]	1237	4.5	0.828104	1.03244	no	NA	TAS4-3'D3[+]:AT3G53270.6	0.899704
AT4G14570.1	TAS3B-5'D7[+]	2280	5.5	1.01957	1.54032	no	AARE	TAS3B-5'D7[+]:AARE	0.924418
AT5G53160.2	TAS3B-5'D5[+]	321	4.5	0.339858	0.936436	no	PYL8	TAS3B-5'D5[+]:PYL8	0.924418
AT2G16640.1	TAS3B-5'D8[+]	865	6	1.34507	2.34507	no	ATTOC132	TAS3B-5'D8[+]:ATTOC132	0.929168
AT5G16450.2	TAS2-3'D9[-]	441	4.5	0.402085	1.40209	no	NA	TAS2-3'D9[-]:AT5G16450.2	0.953953
AT1G52670.1	TAS2-3'D3[-]	1010	4.5	1.05308	1.47437	no	NA	TAS2-3'D3[-]:AT1G52670.1	0.970987
AT2G38750.1	TAS4-3'D2[-]	629	5	0.464313	1.46431	no	ANNAT4	TAS4-3'D2[-]:ANNAT4	0.970987
AT3G06760.2	TAS3B-5'D7[+]	861	4	1.09137	0.536144	no	NA	TAS3B-5'D7[+]:AT3G06760.2	0.970987
AT3G20540.2	TAS1A-3'D7[-]	2716	6	1.04829	2.04829	no	POLGAMMA1	TAS1A-3'D7[-]:POLGAMMA1	0.970987
AT3G52300.2	TAS3B-5'D5[+]	377	6	2.49867	2.13149	no	ATPQ	TAS3B-5'D5[+]:ATPQ	0.970987
AT4G31300.3	TAS3B-5'D1[+]	411	5	1.24455	1.41703	no	PBA1	TAS3B-5'D1[+]:PBA1	0.970987
AT1G18540.1	TAS4-3'D8[+]	728	4.5	0.464313	0.210261	no	NA	TAS4-3'D8[+]:AT1G18540.1	0.989932
AT1G20816.1	TAS3C-5'D8[-]	572	4.5	0.473886	0.45088	no	NA	TAS3C-5'D8[-]:AT1G20816.1	0.989932
AT1G20890.1	TAS3A-5'D6[+]	246	6	0.464313	1.46431	no	NA	TAS3A-5'D6[+]:AT1G20890.1	0.989932
AT1G26640.1	TAS3A-5'D6[+]	120	6	1.09616	1.46502	no	NA	TAS3A-5'D6[+]:AT1G26640.1	0.989932
AT1G42550.1	TAS3A-5'D1[+]	2397	4.5	0.464313	0.431523	no	PMI1	TAS3A-5'D1[+]:PMI1	0.989932
AT1G53300.1	TAS3B-5'D7[+]	996	5.5	0.813744	1.11474	no	TTL1	TAS3B-5'D7[+]:TTL1	0.989932
AT1G70060.1	TAS3C-5'D10[+]	2099	6	0.507393	1.50739	no	SNL4	TAS3C-5'D10[+]:SNL4	0.989932
AT1G71070.1	TAS3C-5'D3[+]	1649	5	1.59398	0.819946	no	NA	TAS3C-5'D3[+]:AT1G71070.1	0.989932
AT1G74060.1	TAS4-3'D8[+]	771	4.5	0.689289	0.503503	no	NA	TAS4-3'D8[+]:AT1G74060.1	0.989932
AT1G74950.1	TAS3A-5'D4[+]	838	6	0.655782	1.65578	no	JAZ2	TAS3A-5'D4[+]:JAZ2	0.989932
AT1G75930.1	TAS3A-5'D5[+]	662	4.5	0.574407	0.317815	no	EXL6	TAS3A-5'D5[+]:EXL6	0.989932
AT2G35940.3	TAS4-3'D9[-]	2758	4.5	0.583981	0.686663	no	BLH1	TAS4-3'D9[-]:BLH1	0.989932
AT2G36410.3	TAS3A-5'D4[+]	504	6	2.38379	1.4948	no	NA	TAS3A-5'D4[+]:AT2G36410.3	0.989932
AT2G39220.1	TAS3C-5'D1[+]	385	4.5	0.574407	0.681102	no	PLA IIB	TAS3C-5'D1[+]:PLA IIB	0.989932
AT2G39730.3	TAS2-3'D8[-]	283	5	2.40772	1.10905	no	RCA	TAS2-3'D8[-]:RCA	0.989932
AT3G04920.1	TAS3A-5'D8[+]	255	5	3.04436	0.953721	no	NA	TAS3A-5'D8[+]:AT3G04920.1	0.989932
AT4G14990.1	TAS3A-5'D6[+]	2970	5	0.315924	0.675605	no	NA	TAS3A-5'D6[+]:AT4G14990.1	0.989932
AT4G17230.1	TAS3B-5'D7[+]	1570	4.5	0.459526	0.504894	no	SCL13	TAS3B-5'D7[+]:SCL13	0.989932
AT4G23910.2	TAS3B-5'D7[+]	568	6	0.426019	1.42602	no	NA	TAS3B-5'D7[+]:AT4G23910.2	0.989932
AT4G27840.1	TAS4-3'D9[+]	820	5.5	1.2637	1.34384	no	NA	TAS4-3'D9[+]:AT4G27840.1	0.989932
AT4G36648.1	TAS1A-3'D2[-]	1908	6	2.13488	1.94966	no	NA	TAS1A-3'D2[-]:AT4G36648.1	0.989932
AT5G01410.1	TAS1C-3'D7[-]	1134	4.5	0.392512	0.447616	no	ATPDX1	TAS1C-3'D7[-]:ATPDX1	0.989932
AT5G08540.1	TAS3C-5'D3[+]	331	5	2.31678	1.11776	no	NA	TAS3C-5'D3[+]:AT5G08540.1	0.989932
AT5G09670.2	TAS1C-3'D6[-]	1386	5	0.698862	0.962051	no	NA	TAS1C-3'D6[-]:AT5G09670.2	0.989932
AT5G09672.1	TAS1C-3'D6[-]	1386	5	0.698862	0.962051	no	CPuORF21	TAS1C-3'D6[-]:CPuORF21	0.989932
AT5G10050.1	TAS3B-5'D9[+]	693	6	0.976492	1.43416	no	NA	TAS3B-5'D9[+]:AT5G10050.1	0.989932
AT5G10940.2	TAS1B-3'D10[+]	2021	6	0.952559	1.95256	no	ASG2	TAS1B-3'D10[+]:ASG2	0.989932
AT5G13020.1	TAS3A-5'D1[+]	1359	5	0.698862	0.845205	no	AtEML3	TAS3A-5'D1[+]:AtEML3	0.989932
AT5G13460.1	TAS4-3'D9[+]	985	5.5	0.51218	1.51218	no	IQD11	TAS4-3'D9[+]:IQD11	0.989932
AT5G19990.1	TAS3B-5'D6[+]	963	4.5	0.373365	0.444196	no	ATSUG1	TAS3B-5'D6[+]:ATSUG1	0.989932
AT5G22640.2	TAS3C-5'D2[+]	1738	5	0.483459	1.14396	no	emb1211	TAS3C-5'D2[+]:emb1211	0.989932
AT5G22700.1	TAS1C-3'D6[-]	1502	5.5	1.71365	1.18129	no	NA	TAS1C-3'D6[-]:AT5G22700.1	0.989932
AT5G28540.1	TAS1B-3'D4[-]	1747	5	1.17753	1.00441	no	BIP1	TAS1B-3'D4[-]:BIP1	0.989932
AT5G33370.2	TAS3C-5'D4[-]	1300	3.5	3.06351	0.706302	no	NA	TAS3C-5'D4[-]:AT5G33370.2	0.989932
AT5G48180.1	TAS1B-3'D7[-]	657	5.5	1.84289	1.3719	no	AtNSP5	TAS1B-3'D7[-]:AtNSP5	0.989932
AT5G61820.1	TAS1C-3'D5[-]	1236	6	2.22104	1.51246	no	NA	TAS1C-3'D5[-]:AT5G61820.1	0.989932
ATCG00830.1	TAS3B-5'D9[+]	771	4.5	2.07744	0.17186	no	RPL2.1	TAS3B-5'D9[+]:RPL2.1	0.989932
ATCG00860.1	TAS4-3'D2[-]	538	5	0.0670142	0.936951	no	YCF2.1	TAS4-3'D2[-]:YCF2.1	0.989932
ATCG01280.1	TAS4-3'D2[-]	538	5	0.205829	0.611566	no	YCF2.2	TAS4-3'D2[-]:YCF2.2	0.989932
AT1G04270.2	TAS1A-3'D5[+]	82	5	2.59441	0.437617	no	RPS15	TAS1A-3'D5[+]:RPS15	0.999955
AT1G06550.1	TAS3C-5'D10[+]	1260	6	0.516967	0.560002	no	NA	TAS3C-5'D10[+]:AT1G06550.1	0.999955
AT1G07320.4	TAS1B-3'D4[-]	853	6	0.459526	0.109056	no	EMB2784	TAS1B-3'D4[-]:EMB2784	0.999955
AT1G15270.1	TAS3B-5'D9[+]	207	6	0.536113	0.383905	no	NA	TAS3B-5'D9[+]:AT1G15270.1	0.999955
AT1G17490.1	TAS1A-3'D5[+]	342	6	0.296777	0.534436	no	NA	TAS1A-3'D5[+]:AT1G17490.1	0.999955
AT1G22640.1	TAS2-3'D9[+]	476	5.5	0.560047	0.829478	no	ATMYB3	TAS2-3'D9[+]:ATMYB3	0.999955
AT1G23190.1	TAS3C-5'D9[+]	1230	5	0.306351	0.616177	no	PGM3	TAS3C-5'D9[+]:PGM3	0.999955
AT1G25230.1	TAS3A-5'D3[+]	250	5.5	1.00043	0.861831	no	NA	TAS3A-5'D3[+]:AT1G25230.1	0.999955
AT1G30360.1	TAS2-3'D3[+]	2344	5.5	1.21583	0.429452	no	ERD4	TAS2-3'D3[+]:ERD4	0.999955
AT1G34030.1	TAS3C-5'D2[+]	355	6	0.890331	0.646431	no	NA	TAS3C-5'D2[+]:AT1G34030.1	0.999955
AT1G49520.1	TAS3B-5'D7[+]	691	6	0.205829	1.20583	no	NA	TAS3B-5'D7[+]:AT1G49520.1	0.999955
AT1G50430.2	TAS3C-5'D2[-]	542	6	1.29242	1.15148	no	7RED	TAS3C-5'D2[-]:7RED	0.999955
AT1G53910.3	TAS3C-5'D9[+]	805	6	0.29199	0.635219	no	RAP2.12	TAS3C-5'D9[+]:RAP2.12	0.999955
AT1G56070.1	TAS1C-3'D6[-]	2382	5	0.660568	0.255286	no	LOS1	TAS1C-3'D6[-]:LOS1	0.999955
AT1G57720.2	TAS3B-5'D8[+]	1181	6	0.406872	0.292475	no	NA	TAS3B-5'D8[+]:AT1G57720.2	0.999955
AT1G64230.5	TAS3C-5'D9[+]	777	6	0.378151	0.488886	no	UBC28	TAS3C-5'D9[+]:UBC28	0.999955
AT1G65960.2	TAS3B-5'D6[+]	1452	6	2.61355	0.720396	no	GAD2	TAS3B-5'D6[+]:GAD2	0.999955
AT1G66350.1	TAS1C-3'D7[-]	1591	5	1.17275	0.286757	no	RGL	TAS1C-3'D7[-]:RGL	0.999955
AT1G67840.2	TAS3A-5'D6[-]	1915	6	0.373365	1.37336	no	CSK	TAS3A-5'D6[-]:CSK	0.999955
AT1G73080.1	TAS3B-5'D7[-]	40	5.5	0.382938	0.630931	no	ATPEPR1	TAS3B-5'D7[-]:ATPEPR1	0.999955
AT1G75940.1	TAS2-3'D3[+]	1613	6	2.61834	0.716564	no	ATA27	TAS2-3'D3[+]:ATA27	0.999955
AT1G76490.1	TAS3A-5'D4[+]	2170	5	0.445166	0.421716	no	AtHMGR1	TAS3A-5'D4[+]:AtHMGR1	0.999955
AT1G76810.1	TAS1B-3'D10[+]	2709	6	0.976492	1.36766	no	NA	TAS1B-3'D10[+]:AT1G76810.1	0.999955
AT1G80460.2	TAS3A-5'D9[-]	1087	5.5	0.780237	0.861083	no	GLI1	TAS3A-5'D9[-]:GLI1	0.999955
AT2G01250.2	TAS3B-5'D7[+]	156	5.5	0.569621	0.404374	no	NA	TAS3B-5'D7[+]:AT2G01250.2	0.999955
AT2G13350.1	TAS3B-5'D8[-]	451	6	0.335071	1.33507	no	NA	TAS3B-5'D8[-]:AT2G13350.1	0.999955
AT2G15020.1	TAS3C-5'D3[+]	1506	6	1.4408	0.748863	no	NA	TAS3C-5'D3[+]:AT2G15020.1	0.999955
AT2G18969.1	TAS3A-5'D1[+]	328	6	2.58005	1.0888	no	NA	TAS3A-5'D1[+]:AT2G18969.1	0.999955
AT2G21660.2	TAS4-3'D2[-]	542	5.5	3.84374	0.680545	no	ATGRP7	TAS4-3'D2[-]:ATGRP7	0.999955
AT2G30500.2	TAS1C-3'D5[-]	1354	6	0.607914	0.83371	no	NET4B	TAS1C-3'D5[-]:NET4B	0.999955
AT2G30570.1	TAS3B-5'D7[+]	263	6	1.85725	0.235477	no	PSBW	TAS3B-5'D7[+]:PSBW	0.999955
AT2G35390.3	TAS1A-3'D10[-]	758	6	0.339858	1.33986	no	NA	TAS1A-3'D10[-]:AT2G35390.3	0.999955
AT2G36160.1	TAS1B-3'D4[-]	536	5.5	1.35943	0.326666	no	NA	TAS1B-3'D4[-]:AT2G36160.1	0.999955
AT2G38800.1	TAS3C-5'D2[+]	1451	5.5	0.473886	0.653863	no	NA	TAS3C-5'D2[+]:AT2G38800.1	0.999955
AT2G41070.3	TAS3B-5'D7[+]	44	6	0.00957345	1.00957	no	ATBZIP12	TAS3B-5'D7[+]:ATBZIP12	0.999955
AT2G46560.1	TAS1C-3'D4[-]	5384	6	1.05308	0.89747	no	NA	TAS1C-3'D4[-]:AT2G46560.1	0.999955
AT3G02080.1	TAS1C-3'D7[-]	447	5	0.373365	0.332107	no	NA	TAS1C-3'D7[-]:AT3G02080.1	0.999955
AT3G02200.2	TAS3C-5'D4[+]	1119	6	0.923838	1.28854	no	NA	TAS3C-5'D4[+]:AT3G02200.2	0.999955
AT3G05530.1	TAS3C-5'D3[+]	311	5.5	0.478673	0.828378	no	ATS6A.2	TAS3C-5'D3[+]:ATS6A.2	0.999955
AT3G09810.1	TAS3C-5'D10[-]	948	5	0.746729	0.724159	no	IDH-VI	TAS3C-5'D10[-]:IDH-VI	0.999955
AT3G10570.1	TAS4-3'D9[+]	1554	6	1.8764	1.05625	no	CYP77A6	TAS4-3'D9[+]:CYP77A6	0.999955
AT3G11690.1	TAS3A-5'D1[+]	1196	6	0.440379	0.616733	no	NA	TAS3A-5'D1[+]:AT3G11690.1	0.999955
AT3G12010.1	TAS1A-3'D3[+]	2374	6	0.354218	0.359979	no	NA	TAS1A-3'D3[+]:AT3G12010.1	0.999955
AT3G12012.1	TAS1A-3'D3[+]	2374	6	0.354218	0.359979	no	CPuORF20	TAS1A-3'D3[+]:CPuORF20	0.999955
AT3G22320.1	TAS3B-5'D2[+]	823	5.5	0.459526	0.276963	no	ATRPABC24.3	TAS3B-5'D2[+]:ATRPABC24.3	0.999955
AT3G28720.1	TAS1C-3'D2[+]	1950	6	0.813744	1.07064	no	NA	TAS1C-3'D2[+]:AT3G28720.1	0.999955
AT3G30180.1	TAS3C-5'D1[+]	1460	6	1.27327	0.726263	no	BR6OX2	TAS3C-5'D1[+]:BR6OX2	0.999955
AT3G46430.1	TAS3C-5'D3[+]	86	6	1.4073	0.690897	no	NA	TAS3C-5'D3[+]:AT3G46430.1	0.999955
AT3G57000.1	TAS1C-3'D10[+]	307	6	0.718009	0.825252	no	NA	TAS1C-3'D10[+]:AT3G57000.1	0.999955
AT3G58000.1	TAS3C-5'D6[-]	382	6	0.895118	0.954207	no	NA	TAS3C-5'D6[-]:AT3G58000.1	0.999955
AT3G60030.1	TAS1B-3'D4[-]	371	6	0.445166	1.39831	no	SPL12	TAS1B-3'D4[-]:SPL12	0.999955
AT4G02530.1	TAS3B-5'D9[+]	298	6	1.37858	0.566662	no	NA	TAS3B-5'D9[+]:AT4G02530.1	0.999955
AT4G14690.1	TAS4-3'D4[-]	265	5.5	1.61313	0.564593	no	ELIP2	TAS4-3'D4[-]:ELIP2	0.999955
AT4G15545.1	TAS3C-5'D3[+]	338	5	0.445166	0.585199	no	NA	TAS3C-5'D3[+]:AT4G15545.1	0.999955
AT4G18970.2	TAS3B-5'D10[-]	824	6	1.04829	0.974935	no	NA	TAS3B-5'D10[-]:AT4G18970.2	0.999955
AT4G21960.1	TAS3B-5'D7[+]	600	6	0.315924	0.217165	no	PRXR1	TAS3B-5'D7[+]:PRXR1	0.999955
AT4G25370.1	TAS3B-5'D10[+]	775	5	0.368578	0.501676	no	NA	TAS3B-5'D10[+]:AT4G25370.1	0.999955
AT4G32410.1	TAS3C-5'D5[+]	2267	6	0.325497	0.511935	no	AtCESA1	TAS3C-5'D5[+]:AtCESA1	0.999955
AT4G35110.4	TAS1B-3'D4[-]	1131	5.5	0.435592	0.763305	no	NA	TAS1B-3'D4[-]:AT4G35110.4	0.999955
AT5G01410.1	TAS4-3'D6[+]	694	6	0.875971	0.337008	no	ATPDX1	TAS4-3'D6[+]:ATPDX1	0.999955
AT5G07530.2	TAS3B-5'D6[+]	635	5.5	5.16488	0.0013881	no	ATGRP-7	TAS3B-5'D6[+]:ATGRP-7	0.999955
AT5G10630.2	TAS1B-3'D4[+]	378	6	0.459526	1.45953	no	NA	TAS1B-3'D4[+]:AT5G10630.2	0.999955
AT5G16680.1	TAS1B-3'D4[-]	193	6	0.339858	0.36932	no	NA	TAS1B-3'D4[-]:AT5G16680.1	0.999955
AT5G18520.1	TAS4-3'D9[+]	1334	6	2.54175	0.966052	no	Cand7	TAS4-3'D9[+]:Cand7	0.999955
AT5G20280.1	TAS3C-5'D9[+]	534	6	1.76152	1.5347	no	ATSPS1F	TAS3C-5'D9[+]:ATSPS1F	0.999955
AT5G26000.2	TAS3C-5'D2[+]	823	5.5	0.406872	0.319847	no	AtTGG1	TAS3C-5'D2[+]:AtTGG1	0.999955
AT5G26742.3	TAS3A-5'D7[+]	1804	6	1.41687	1.08838	no	AtRH3	TAS3A-5'D7[+]:AtRH3	0.999955
AT5G40450.1	TAS3A-5'D6[+]	2042	6	0.416445	1.04595	no	NA	TAS3A-5'D6[+]:AT5G40450.1	0.999955
AT5G42390.1	TAS2-3'D3[+]	1651	6	0.397298	1.3973	no	SPP	TAS2-3'D3[+]:SPP	0.999955
AT5G48880.3	TAS2-3'D8[+]	424	6	0.574407	0.808312	no	KAT5	TAS2-3'D8[+]:KAT5	0.999955
AT5G52470.2	TAS1A-3'D9[-]	188	6	0.689289	0.419677	no	ATFBR1	TAS1A-3'D9[-]:ATFBR1	0.999955
AT5G53880.1	TAS3B-5'D9[+]	241	6	0.143602	0.362584	no	NA	TAS3B-5'D9[+]:AT5G53880.1	0.999955
AT5G56360.1	TAS1C-3'D7[-]	1273	5.5	0.919052	0.531775	no	PSL4	TAS1C-3'D7[-]:PSL4	0.999955
AT5G63150.1	TAS3C-5'D3[+]	411	6	0.440379	0.515338	no	NA	TAS3C-5'D3[+]:AT5G63150.1	0.999955
AT5G64740.1	TAS4-3'D9[+]	787	6	0.397298	0.941919	no	CESA6	TAS4-3'D9[+]:CESA6	0.999955
AT5G65220.1	TAS3B-5'D9[+]	450	6	0.76109	0.641058	no	NA	TAS3B-5'D9[+]:AT5G65220.1	0.999955
ATCG01130.1	TAS3C-5'D4[+]	4586	6	0.502606	0.195351	no	YCF1.2	TAS3C-5'D4[+]:YCF1.2	0.999955

## Sheet: xrn4 (biorep #2)
Target transcript	tasiRNA	tasiRNA slice site position in target transcript	Allen score of sRNA:target duplex	Slice site RPM	Slice site RPM + 1/Maximum adjacent site RPM + 1	Previously verified by 5' RACE?	Target gene common name	Interaction name	P-value adjusted for multiple testing
AT2G33860.1	TAS3A-5'D7[+]	1684	1.5	8.35849	9.35849	yes	ARF3	TAS3A-5'D7[+]:ARF3	0
AT2G33860.1	TAS3A-5'D8[+]	1804	1	2.11298	1.40111	yes	ARF3	TAS3A-5'D8[+]:ARF3	0
AT3G10270.1	TAS1C-3'D7[+]	2500	6	2.08423	3.08423	no	GYRB1	TAS1C-3'D7[+]:GYRB1	0
AT5G18040.1	TAS1A-3'D2[+]	685	2	20.3033	6.07231	yes	NA	TAS1A-3'D2[+]:AT5G18040.1	0
AT5G18065.1	TAS1A-3'D2[+]	736	2	0.725888	1.72589	no	NA	TAS1A-3'D2[+]:AT5G18065.1	0
AT5G60450.1	TAS3A-5'D8[+]	1884	1	1.39428	1.59291	yes	ARF4	TAS3A-5'D8[+]:ARF4	0
AT5G60450.1	TAS3C-5'D5[+]	2095	1.5	0.740262	1.17464	yes	ARF4	TAS3C-5'D5[+]:ARF4	0
AT3G03140.1	TAS1A-3'D7[-]	1720	2.5	1.67457	2.67457	no	NA	TAS1A-3'D7[-]:AT3G03140.1	0.013799
AT4G29770.2	TAS1A-3'D6[+]	780	3	1.11399	2.11399	yes	NA	TAS1A-3'D6[+]:AT4G29770.2	0.0181207
AT5G62000.4	TAS3A-5'D7[+]	1745	1.5	1.50927	0.988672	yes	ARF1-BP	TAS3A-5'D7[+]:ARF1-BP	0.0743553
AT1G51670.1	TAS1A-3'D6[+]	536	3.5	0.733075	1.73307	no	NA	TAS1A-3'D6[+]:AT1G51670.1	0.110848
AT2G33500.2	TAS3C-5'D8[+]	1466	3	2.46514	2.03314	no	BBX12	TAS3C-5'D8[+]:BBX12	0.247931
AT4G04614.1	TAS3C-5'D3[+]	403	6	2.88199	3.88199	no	NA	TAS3C-5'D3[+]:AT4G04614.1	0.308284
AT2G25930.1	TAS3C-5'D10[+]	2440	5	4.09659	2.91659	no	ELF3	TAS3C-5'D10[+]:ELF3	0.373772
AT1G48380.2	TAS3B-5'D6[+]	1054	4	0.711514	1.71151	no	HYP7	TAS3B-5'D6[+]:HYP7	0.465678
AT3G26030.1	TAS3A-5'D2[+]	1451	4.5	1.43021	2.43021	no	ATB' DELTA	TAS3A-5'D2[+]:ATB' DELTA	0.471936
AT1G62680.1	TAS3B-5'D7[+]	1051	4.5	0.884002	1.884	no	NA	TAS3B-5'D7[+]:AT1G62680.1	0.489027
AT4G32820.2	TAS1B-3'D4[-]	3733	4.5	2.45796	1.89321	no	NA	TAS1B-3'D4[-]:AT4G32820.2	0.498546
AT3G12020.2	TAS2-3'D6[+]	1376	4.5	0.941498	1.9415	no	NA	TAS2-3'D6[+]:AT3G12020.2	0.516656
AT3G48440.1	TAS1A-3'D7[-]	457	6	1.81831	2.81831	no	NA	TAS1A-3'D7[-]:AT3G48440.1	0.601677
AT5G17980.1	TAS3A-5'D4[+]	2279	4.5	1.92612	1.68142	no	NA	TAS3A-5'D4[+]:AT5G17980.1	0.601677
AT5G56930.1	TAS3B-5'D6[+]	792	5.5	1.25773	2.25773	no	EMB1789	TAS3B-5'D6[+]:EMB1789	0.616657
AT1G06950.1	TAS2-3'D7[-]	903	5.5	1.05649	2.05649	no	ATTIC110	TAS2-3'D7[-]:ATTIC110	0.616882
AT1G28440.1	TAS1A-3'D3[-]	1560	6	1.1068	2.1068	no	HSL1	TAS1A-3'D3[-]:HSL1	0.616882
AT2G29910.2	TAS1C-3'D6[-]	1448	4	1.08524	1.15071	no	NA	TAS1C-3'D6[-]:AT2G29910.2	0.616882
AT3G25290.2	TAS4-3'D2[-]	334	4	0.459968	0.898293	no	NA	TAS4-3'D2[-]:AT3G25290.2	0.616882
AT5G07030.1	TAS1A-3'D2[+]	965	4	2.09861	1.05895	no	NA	TAS1A-3'D2[+]:AT5G07030.1	0.616882
AT1G26761.1	TAS1B-3'D4[-]	1292	4	0.639644	1.04107	no	NA	TAS1B-3'D4[-]:AT1G26761.1	0.636116
AT2G16750.1	TAS3C-5'D3[+]	1998	4.5	1.23617	1.21949	no	NA	TAS3C-5'D3[+]:AT2G16750.1	0.636116
AT2G30590.1	TAS3C-5'D9[+]	392	4.5	0.344976	1.34498	no	WRKY21	TAS3C-5'D9[+]:WRKY21	0.636116
AT2G44580.1	TAS3C-5'D3[+]	867	5.5	0.905563	1.90556	no	NA	TAS3C-5'D3[+]:AT2G44580.1	0.636116
AT3G06350.1	TAS3B-5'D7[+]	1744	5.5	2.24235	1.84034	no	EMB3004	TAS3B-5'D7[+]:EMB3004	0.636116
AT5G04240.1	TAS1C-3'D7[-]	738	4.5	0.481529	1.48153	no	ELF6	TAS1C-3'D7[-]:ELF6	0.636116
AT5G58000.1	TAS3B-5'D6[+]	1024	4.5	0.402472	1.40247	no	NA	TAS3B-5'D6[+]:AT5G58000.1	0.636116
ATCG01040.1	TAS1B-3'D9[+]	199	3.5	0.618083	0.0395597	no	YCF5	TAS1B-3'D9[+]:YCF5	0.638698
AT5G14140.1	TAS3C-5'D9[+]	823	6	1.11399	2.11399	no	NA	TAS3C-5'D9[+]:AT5G14140.1	0.675311
AT3G09860.1	TAS3A-5'D4[-]	455	4	3.39945	1.01492	no	NA	TAS3A-5'D4[-]:AT3G09860.1	0.697808
AT3G54000.3	TAS1A-3'D7[-]	1530	5.5	1.77519	2.77519	no	NA	TAS1A-3'D7[-]:AT3G54000.3	0.748173
AT2G31220.1	TAS4-3'D6[+]	790	6	2.3214	3.3214	no	NA	TAS4-3'D6[+]:AT2G31220.1	0.74942
AT1G15690.2	TAS4-3'D4[-]	1074	4	1.30085	0.60847	no	AtAVP1	TAS4-3'D4[-]:AtAVP1	0.756876
AT2G41290.1	TAS3C-5'D10[+]	1046	4.5	1.06368	1.5426	no	SSL2	TAS3C-5'D10[+]:SSL2	0.77867
AT4G02280.1	TAS1B-3'D7[-]	966	5	1.06368	2.06368	no	ATSUS3	TAS1B-3'D7[-]:ATSUS3	0.77867
AT4G31340.2	TAS1C-3'D7[+]	1503	6	3.24134	2.38788	no	NA	TAS1C-3'D7[+]:AT4G31340.2	0.77867
AT2G13540.1	TAS1C-3'D4[+]	381	5	0.424033	1.42403	no	ABH1	TAS1C-3'D4[+]:ABH1	0.791183
AT1G78830.1	TAS3C-5'D8[-]	1332	4	0.689953	0.522371	no	NA	TAS3C-5'D8[-]:AT1G78830.1	0.796987
AT1G29750.2	TAS2-3'D7[+]	1922	5.5	1.14273	2.14273	no	RKF1	TAS2-3'D7[+]:RKF1	0.811902
AT2G19760.1	TAS3C-5'D3[+]	93	5.5	0.91275	1.91275	no	PFN1	TAS3C-5'D3[+]:PFN1	0.811902
AT5G17760.2	TAS3A-5'D1[+]	557	6	1.20742	2.20742	no	NA	TAS3A-5'D1[+]:AT5G17760.2	0.811902
AT5G59950.5	TAS3B-5'D5[+]	1167	4	0.610896	0.670796	no	NA	TAS3B-5'D5[+]:AT5G59950.5	0.811902
AT5G66560.1	TAS3C-5'D3[+]	471	5.5	0.98462	1.98462	no	NA	TAS3C-5'D3[+]:AT5G66560.1	0.811902
AT1G71070.1	TAS3C-5'D3[+]	1649	5	1.26491	1.31232	no	NA	TAS3C-5'D3[+]:AT1G71070.1	0.812489
AT1G71080.1	TAS1C-3'D7[-]	469	6	1.29366	2.29366	no	NA	TAS1C-3'D7[-]:AT1G71080.1	0.812489
AT1G72470.1	TAS3B-5'D6[+]	435	4.5	0.438407	0.826546	no	ATEXO70D1	TAS3B-5'D6[+]:ATEXO70D1	0.812489
AT1G74720.1	TAS4-3'D4[+]	1939	5.5	0.632457	1.523	no	QKY	TAS4-3'D4[+]:QKY	0.812489
AT1G75930.1	TAS3A-5'D5[+]	662	4.5	1.97643	0.718819	no	EXL6	TAS3A-5'D5[+]:EXL6	0.812489
AT2G19760.1	TAS2-3'D3[-]	645	4	1.13555	0.945884	no	PFN1	TAS2-3'D3[-]:PFN1	0.812489
AT2G29570.1	TAS1C-3'D6[-]	542	5	0.682766	1.68277	no	ATPCNA2	TAS1C-3'D6[-]:ATPCNA2	0.812489
AT2G35630.1	TAS2-3'D7[+]	6075	5	0.481529	1.48153	no	GEM1	TAS2-3'D7[+]:GEM1	0.812489
AT2G39675.1	TAS1A-3'D10[-]	631	4	1.45896	0.657784	no	TAS1c	TAS1A-3'D10[-]:TAS1c	0.812489
AT3G13782.1	TAS3B-5'D9[+]	662	5.5	0.783384	1.78338	no	NAP1;4	TAS3B-5'D9[+]:NAP1;4	0.812489
AT3G55350.1	TAS3B-5'D7[+]	159	4	0.62527	0.403721	no	NA	TAS3B-5'D7[+]:AT3G55350.1	0.812489
AT4G21150.3	TAS3B-5'D10[+]	471	4.5	0.610896	0.808761	no	HAP6	TAS3B-5'D10[+]:HAP6	0.812489
AT5G02590.1	TAS3C-5'D1[+]	695	5.5	0.91275	1.91275	no	NA	TAS3C-5'D1[+]:AT5G02590.1	0.812489
AT5G11580.1	TAS3B-5'D1[+]	1605	5	0.84088	1.33309	no	NA	TAS3B-5'D1[+]:AT5G11580.1	0.812489
AT5G50460.1	TAS1A-3'D8[-]	189	4	2.56576	0.550569	no	NA	TAS1A-3'D8[-]:AT5G50460.1	0.812489
AT5G51440.1	TAS3C-5'D4[+]	603	6	1.12117	2.12117	no	NA	TAS3C-5'D4[+]:AT5G51440.1	0.812489
AT5G58590.1	TAS3C-5'D3[+]	711	6	2.20641	2.02662	no	RANBP1	TAS3C-5'D3[+]:RANBP1	0.812489
ATMG00516.1	TAS3B-5'D9[-]	284	3	0.711514	0.575022	no	NAD1	TAS3B-5'D9[-]:NAD1	0.812489
AT5G67470.1	TAS3B-5'D3[-]	2718	6	2.81012	1.89241	no	ATFH6	TAS3B-5'D3[-]:ATFH6	0.845559
AT1G47200.1	TAS3B-5'D7[+]	622	5	2.81731	1.19588	no	WPP2	TAS3B-5'D7[+]:WPP2	0.849161
AT5G33370.2	TAS3C-5'D4[-]	1300	3.5	2.56576	0.612413	no	NA	TAS3C-5'D4[-]:AT5G33370.2	0.859251
AT4G39960.1	TAS3C-5'D2[-]	1595	4	0.797758	0.912454	no	NA	TAS3C-5'D2[-]:AT4G39960.1	0.876054
AT3G09920.3	TAS3C-5'D3[+]	2679	6	0.797758	1.79776	no	PIP5K9	TAS3C-5'D3[+]:PIP5K9	0.880121
AT3G10730.1	TAS1C-3'D7[-]	1172	5	0.380911	1.38091	no	ATSUN2	TAS1C-3'D7[-]:ATSUN2	0.880121
AT3G13300.2	TAS3B-5'D7[+]	2414	6	0.761823	1.76182	no	VCS	TAS3B-5'D7[+]:VCS	0.880121
AT4G15110.1	TAS2-3'D4[+]	1734	5	0.416846	1.41685	no	CYP97B3	TAS2-3'D4[+]:CYP97B3	0.880121
AT4G25080.5	TAS1A-3'D9[-]	1012	5	0.804945	0.992099	no	CHLM	TAS1A-3'D9[-]:CHLM	0.910351
AT1G55860.2	TAS1C-3'D9[+]	8689	5.5	0.57496	1.57496	no	UPL1	TAS1C-3'D9[+]:UPL1	0.942083
AT5G19990.1	TAS3B-5'D6[+]	963	4.5	0.452781	0.515479	no	ATSUG1	TAS3B-5'D6[+]:ATSUG1	0.942083
AT2G14750.1	TAS1C-3'D6[+]	609	5	0.610896	0.94518	no	AKN1	TAS1C-3'D6[+]:AKN1	0.942477
AT3G04920.1	TAS3A-5'D8[+]	255	5	1.28647	0.871282	no	NA	TAS3A-5'D8[+]:AT3G04920.1	0.942477
AT3G52110.2	TAS3B-5'D9[+]	1005	5.5	1.33678	1.34834	no	NA	TAS3B-5'D9[+]:AT3G52110.2	0.942477
AT4G02530.1	TAS3B-5'D9[+]	298	6	0.646831	1.64683	no	NA	TAS3B-5'D9[+]:AT4G02530.1	0.942477
AT5G62030.1	TAS3C-5'D6[-]	1722	5.5	0.531838	1.53184	no	NA	TAS3C-5'D6[-]:AT5G62030.1	0.942477
ATCG00830.1	TAS3B-5'D9[+]	771	4.5	4.48469	0.38933	no	RPL2.1	TAS3B-5'D9[+]:RPL2.1	0.942477
AT1G02000.1	TAS4-3'D10[-]	1389	6	0.424033	1.42403	no	GAE2	TAS4-3'D10[-]:GAE2	0.957478
AT1G05090.1	TAS3B-5'D6[+]	326	5.5	0.129366	1.12937	no	NA	TAS3B-5'D6[+]:AT1G05090.1	0.957478
AT1G05350.1	TAS3C-5'D5[+]	1340	6	0.740262	1.11002	no	NA	TAS3C-5'D5[+]:AT1G05350.1	0.957478
AT1G12850.1	TAS3C-5'D3[+]	80	5.5	0.905563	0.777216	no	NA	TAS3C-5'D3[+]:AT1G12850.1	0.957478
AT1G27210.1	TAS1A-3'D9[-]	997	6	0.62527	0.945639	no	NA	TAS1A-3'D9[-]:AT1G27210.1	0.957478
AT1G27435.1	TAS3B-5'D6[+]	105	6	2.14173	1.22744	no	NA	TAS3B-5'D6[+]:AT1G27435.1	0.957478
AT1G29520.1	TAS3C-5'D4[+]	465	5.5	1.16429	1.30284	no	NA	TAS3C-5'D4[+]:AT1G29520.1	0.957478
AT1G63000.1	TAS3C-5'D2[-]	1161	4	0.50309	0.257834	no	NRS/ER	TAS3C-5'D2[-]:NRS/ER	0.957478
AT2G30110.1	TAS4-3'D2[-]	3130	6	0.884002	0.912933	no	ATUBA1	TAS4-3'D2[-]:ATUBA1	0.957478
AT2G33480.2	TAS3C-5'D3[+]	726	5	0.689953	0.463659	no	ANAC041	TAS3C-5'D3[+]:ANAC041	0.957478
AT2G35060.2	TAS4-3'D7[+]	346	6	0.388098	1.3881	no	KUP11	TAS4-3'D7[+]:KUP11	0.957478
AT2G38120.1	TAS3B-5'D5[+]	151	5	0.596521	0.651168	no	AtAUX1	TAS3B-5'D5[+]:AtAUX1	0.957478
AT2G39730.3	TAS2-3'D8[-]	283	5	1.35116	0.303712	no	RCA	TAS2-3'D8[-]:RCA	0.957478
AT2G47650.2	TAS3B-5'D1[+]	778	5.5	0.560586	0.733234	no	UXS4	TAS3B-5'D1[+]:UXS4	0.957478
AT3G11100.1	TAS3C-5'D4[+]	336	5	1.0493	0.61302	no	NA	TAS3C-5'D4[+]:AT3G11100.1	0.957478
AT3G14230.3	TAS3C-5'D2[-]	1483	5	2.96105	0.973506	no	RAP2.2	TAS3C-5'D2[-]:RAP2.2	0.957478
AT3G28830.1	TAS3C-5'D2[+]	487	5.5	1.38709	0.794328	no	NA	TAS3C-5'D2[+]:AT3G28830.1	0.957478
AT3G44620.2	TAS3B-5'D5[+]	441	5	0.373724	0.524907	no	NA	TAS3B-5'D5[+]:AT3G44620.2	0.957478
AT3G46430.1	TAS3C-5'D3[+]	86	6	2.96823	1.00546	no	NA	TAS3C-5'D3[+]:AT3G46430.1	0.957478
AT3G55520.1	TAS4-3'D1[-]	255	5	0.797758	0.801372	no	NA	TAS4-3'D1[-]:AT3G55520.1	0.957478
AT4G08950.1	TAS3A-5'D4[-]	118	4.5	0.797758	0.578841	no	EXO	TAS3A-5'D4[-]:EXO	0.957478
AT4G13270.1	TAS4-3'D7[-]	693	6	0.553399	1.5534	no	NA	TAS4-3'D7[-]:AT4G13270.1	0.957478
AT4G15540.1	TAS3C-5'D5[+]	244	6	0.280293	1.28029	no	UMAMIT38	TAS3C-5'D5[+]:UMAMIT38	0.957478
AT4G20720.1	TAS3B-5'D6[+]	417	5.5	0.129366	1.12937	no	NA	TAS3B-5'D6[+]:AT4G20720.1	0.957478
AT4G24100.1	TAS3C-5'D2[-]	2625	4	0.35935	0.517994	no	NA	TAS3C-5'D2[-]:AT4G24100.1	0.957478
AT4G31290.1	TAS4-3'D10[-]	387	5	0.424033	0.611278	no	NA	TAS4-3'D10[-]:AT4G31290.1	0.957478
AT5G10480.3	TAS3C-5'D3[+]	795	5	2.27828	0.680664	no	PAS2	TAS3C-5'D3[+]:PAS2	0.957478
AT5G24690.1	TAS1B-3'D4[-]	1035	6	2.6017	1.24619	no	NA	TAS1B-3'D4[-]:AT5G24690.1	0.957478
AT5G28640.1	TAS2-3'D3[-]	988	5	1.92612	0.802816	no	AN3	TAS2-3'D3[-]:AN3	0.957478
AT5G34853.1	TAS1C-3'D1[+]	3042	6	1.18586	1.13851	no	MUG8	TAS1C-3'D1[+]:MUG8	0.957478
AT5G43810.2	TAS3B-5'D9[+]	480	6	1.74644	1.04943	no	AGO10	TAS3B-5'D9[+]:AGO10	0.957478
AT5G48800.1	TAS4-3'D6[+]	1745	6	0.776197	1.03345	no	NA	TAS4-3'D6[+]:AT5G48800.1	0.957478
AT5G54100.1	TAS2-3'D7[+]	1001	5.5	1.08524	0.920672	no	NA	TAS2-3'D7[+]:AT5G54100.1	0.957478
AT5G65110.2	TAS3A-5'D9[-]	1115	5	1.68176	0.890252	no	ACX2	TAS3A-5'D9[-]:ACX2	0.957478
AT5G67070.1	TAS3A-5'D4[-]	137	5	1.46615	0.769131	no	RALFL34	TAS3A-5'D4[-]:RALFL34	0.957478
AT4G15545.1	TAS3C-5'D3[+]	338	5	0.632457	0.709502	no	NA	TAS3C-5'D3[+]:AT4G15545.1	0.986297
AT4G14690.1	TAS4-3'D4[-]	265	5.5	1.17867	0.61347	no	ELIP2	TAS4-3'D4[-]:ELIP2	0.99591
AT5G09810.1	TAS1C-3'D5[+]	1319	5.5	2.91792	0.665503	no	ACT7	TAS1C-3'D5[+]:ACT7	0.99591
AT1G04270.2	TAS1A-3'D5[+]	82	5	0.402472	0.17835	no	RPS15	TAS1A-3'D5[+]:RPS15	0.999234
AT1G66350.1	TAS1C-3'D7[-]	1591	5	0.689953	0.329263	no	RGL	TAS1C-3'D7[-]:RGL	0.999234
AT3G19450.1	TAS1A-3'D9[-]	1185	5.5	0.618083	0.659963	no	ATCAD4	TAS1A-3'D9[-]:ATCAD4	0.999234
AT5G01820.1	TAS1A-3'D7[-]	1309	5.5	1.07086	0.663701	no	ATCIPK14	TAS1A-3'D7[-]:ATCIPK14	0.999234
AT1G02190.2	TAS3A-5'D4[+]	1614	6	0.754636	0.605596	no	NA	TAS3A-5'D4[+]:AT1G02190.2	0.999418
AT1G03440.1	TAS3C-5'D3[+]	308	5.5	1.14273	0.0845993	no	NA	TAS3C-5'D3[+]:AT1G03440.1	0.999418
AT1G09770.1	TAS3B-5'D9[+]	768	6	0.682766	0.818271	no	ATCDC5	TAS3B-5'D9[+]:ATCDC5	0.999418
AT1G10200.1	TAS3C-5'D10[+]	579	6	0.539025	0.382297	no	WLIM1	TAS3C-5'D10[+]:WLIM1	0.999418
AT1G23190.1	TAS3B-5'D6[+]	1786	6	0.790571	0.770997	no	PGM3	TAS3B-5'D6[+]:PGM3	0.999418
AT1G30480.1	TAS3B-5'D7[+]	745	6	0.797758	0.683182	no	DRT111	TAS3B-5'D7[+]:DRT111	0.999418
AT1G34030.1	TAS3C-5'D2[+]	355	6	0.366537	1.36654	no	NA	TAS3C-5'D2[+]:AT1G34030.1	0.999418
AT1G44170.3	TAS4-3'D9[+]	870	6	0.43122	0.832734	no	ALDH3H1	TAS4-3'D9[+]:ALDH3H1	0.999418
AT1G44760.1	TAS1A-3'D8[-]	386	6	0.495903	0.842194	no	NA	TAS1A-3'D8[-]:AT1G44760.1	0.999418
AT1G56280.2	TAS3B-5'D7[+]	853	5.5	0.689953	0.349838	no	ATDI19	TAS3B-5'D7[+]:ATDI19	0.999418
AT1G60710.1	TAS3B-5'D5[+]	150	6	1.13555	0.642967	no	ATB2	TAS3B-5'D5[+]:ATB2	0.999418
AT1G61110.1	TAS3A-5'D9[+]	711	6	0.539025	0.888031	no	anac025	TAS3A-5'D9[+]:anac025	0.999418
AT1G64230.5	TAS3C-5'D9[+]	777	6	0.582147	0.555713	no	UBC28	TAS3C-5'D9[+]:UBC28	0.999418
AT1G65960.2	TAS3B-5'D6[+]	1452	6	1.17867	0.532629	no	GAD2	TAS3B-5'D6[+]:GAD2	0.999418
AT1G66760.2	TAS3C-5'D3[+]	218	6	0.467155	0.790811	no	NA	TAS3C-5'D3[+]:AT1G66760.2	0.999418
AT1G73220.1	TAS3C-5'D7[-]	714	6	0.43122	0.563912	no	AtOCT1	TAS3C-5'D7[-]:AtOCT1	0.999418
AT1G75940.1	TAS2-3'D3[+]	1613	6	2.29984	0.249649	no	ATA27	TAS2-3'D3[+]:ATA27	0.999418
AT2G19110.1	TAS3C-5'D9[+]	3121	6	1.13555	0.922396	no	ATHMA4	TAS3C-5'D9[+]:ATHMA4	0.999418
AT2G20580.1	TAS3B-5'D7[+]	2900	5.5	1.20742	0.371778	no	ATRPN1A	TAS3B-5'D7[+]:ATRPN1A	0.999418
AT2G21660.2	TAS4-3'D2[-]	542	5.5	2.47952	0.329092	no	ATGRP7	TAS4-3'D2[-]:ATGRP7	0.999418
AT2G24360.1	TAS3C-5'D3[+]	1643	6	0.560586	0.825188	no	NA	TAS3C-5'D3[+]:AT2G24360.1	0.999418
AT2G26800.3	TAS2-3'D4[+]	1037	6	0.438407	0.975626	no	NA	TAS2-3'D4[+]:AT2G26800.3	0.999418
AT2G28910.1	TAS3B-5'D7[+]	560	5.5	0.632457	0.853461	no	CXIP4	TAS3B-5'D7[+]:CXIP4	0.999418
AT2G30570.1	TAS3B-5'D7[+]	263	6	2.97542	0.289733	no	PSBW	TAS3B-5'D7[+]:PSBW	0.999418
AT2G36160.1	TAS1B-3'D4[-]	536	5.5	0.567773	0.153388	no	NA	TAS1B-3'D4[-]:AT2G36160.1	0.999418
AT2G38170.3	TAS1A-3'D7[-]	104	6	0.639644	0.38989	no	ATCAX1	TAS1A-3'D7[-]:ATCAX1	0.999418
AT3G05020.1	TAS3C-5'D3[+]	258	5.5	0.646831	0.488426	no	ACP	TAS3C-5'D3[+]:ACP	0.999418
AT3G08550.1	TAS1B-3'D5[+]	1300	6	0.337789	0.514	no	ABI8	TAS1B-3'D5[+]:ABI8	0.999418
AT3G08580.2	TAS3C-5'D9[-]	588	6	0.790571	0.380285	no	AAC1	TAS3C-5'D9[-]:AAC1	0.999418
AT3G08730.1	TAS3A-5'D6[+]	685	5.5	0.675579	0.478589	no	ATPK1	TAS3A-5'D6[+]:ATPK1	0.999418
AT3G10570.1	TAS4-3'D9[+]	1554	6	1.63864	0.624239	no	CYP77A6	TAS4-3'D9[+]:CYP77A6	0.999418
AT3G14990.3	TAS3A-5'D7[+]	474	6	1.28647	0.483391	no	AtDJ1A	TAS3A-5'D7[+]:AtDJ1A	0.999418
AT3G47470.1	TAS4-3'D4[-]	291	5.5	1.89018	0.711576	no	CAB4	TAS4-3'D4[-]:CAB4	0.999418
AT3G52300.2	TAS3B-5'D5[+]	377	6	0.452781	0.575667	no	ATPQ	TAS3B-5'D5[+]:ATPQ	0.999418
AT3G54050.2	TAS3B-5'D7[+]	1280	5.5	0.91275	0.663458	no	HCEF1	TAS3B-5'D7[+]:HCEF1	0.999418
AT4G01100.2	TAS3B-5'D2[+]	1120	6	0.531838	0.76356	no	ADNT1	TAS3B-5'D2[+]:ADNT1	0.999418
AT4G11560.1	TAS1A-3'D7[-]	1693	6	0.517464	0.559844	no	NA	TAS1A-3'D7[-]:AT4G11560.1	0.999418
AT4G19120.2	TAS2-3'D3[+]	1851	6	0.589334	0.640726	no	ERD3	TAS2-3'D3[+]:ERD3	0.999418
AT4G19150.2	TAS3A-5'D1[+]	80	6	0.689953	0.399802	no	NA	TAS3A-5'D1[+]:AT4G19150.2	0.999418
AT4G23710.1	TAS1A-3'D3[+]	89	6	0.409659	1.0103	no	VAG2	TAS1A-3'D3[+]:VAG2	0.999418
AT4G30440.1	TAS3B-5'D3[+]	1118	5.5	0.409659	0.592316	no	GAE1	TAS3B-5'D3[+]:GAE1	0.999418
AT4G32410.1	TAS3C-5'D5[+]	2267	6	0.963059	0.627707	no	AtCESA1	TAS3C-5'D5[+]:AtCESA1	0.999418
AT5G07530.2	TAS3B-5'D6[+]	635	5.5	9.75995	0.00373465	no	ATGRP-7	TAS3B-5'D6[+]:ATGRP-7	0.999418
AT5G13380.1	TAS4-3'D10[-]	1192	6	0.603708	1.07207	no	NA	TAS4-3'D10[-]:AT5G13380.1	0.999418
AT5G20190.1	TAS1A-3'D6[+]	644	5.5	0.35935	0.541731	no	NA	TAS1A-3'D6[+]:AT5G20190.1	0.999418
AT5G41990.1	TAS3C-5'D8[-]	2114	6	0.62527	0.323455	no	ATWNK8	TAS3C-5'D8[-]:ATWNK8	0.999418
AT5G41992.1	TAS3C-5'D8[-]	2114	6	0.62527	0.323455	no	CPuORF58	TAS3C-5'D8[-]:CPuORF58	0.999418
AT5G52040.4	TAS3C-5'D3[+]	1445	6	0.495903	0.924491	no	At-RS41	TAS3C-5'D3[+]:At-RS41	0.999418
AT5G56870.1	TAS1B-3'D7[-]	471	6	0.596521	0.752661	no	BGAL4	TAS1B-3'D7[-]:BGAL4	0.999418
AT5G66760.1	TAS1C-3'D5[-]	1777	6	1.20023	1.11673	no	SDH1-1	TAS1C-3'D5[-]:SDH1-1	0.999418
ATCG00380.1	TAS3B-5'D8[+]	235	6	3.52882	0.956004	no	RPS4	TAS3B-5'D8[+]:RPS4	0.999418

## Sheet: xrn4 (biorep #3)
Target transcript	tasiRNA	tasiRNA slice site position in target transcript	Allen score of sRNA:target duplex	Slice site RPM	Slice site RPM + 1/Maximum adjacent site RPM + 1	Previously verified by 5' RACE?	Target gene common name	Interaction name	P-value adjusted for multiple testing
AT1G51670.1	TAS1A-3'D6[+]	536	3.5	2.75141	3.75141	no	NA	TAS1A-3'D6[+]:AT1G51670.1	0
AT2G33860.1	TAS3C-5'D5[+]	1685	1.5	1.10056	0.79241	yes	ARF3	TAS3C-5'D5[+]:ARF3	0
AT2G33860.1	TAS3C-5'D5[+]	1805	1	0.550282	0.738033	yes	ARF3	TAS3C-5'D5[+]:ARF3	0
AT4G29770.2	TAS1A-3'D6[+]	780	3	1.10056	2.10056	yes	NA	TAS1A-3'D6[+]:AT4G29770.2	0
AT5G18040.1	TAS1A-3'D2[+]	685	2	25.313	16.973	yes	NA	TAS1A-3'D2[+]:AT5G18040.1	0
AT5G18065.1	TAS1A-3'D2[+]	736	2	5.50282	6.50282	no	NA	TAS1A-3'D2[+]:AT5G18065.1	0
AT5G60450.1	TAS3A-5'D8[+]	1884	1	1.10056	1	yes	ARF4	TAS3A-5'D8[+]:ARF4	0
AT5G60450.1	TAS3A-5'D7[+]	2094	1.5	0.550282	1	yes	ARF4	TAS3A-5'D7[+]:ARF4	0
AT5G62000.4	TAS3A-5'D7[+]	1745	1.5	1.10056	1	yes	ARF1-BP	TAS3A-5'D7[+]:ARF1-BP	0
AT1G72470.1	TAS3B-5'D6[+]	435	4.5	1.65085	2.65085	no	ATEXO70D1	TAS3B-5'D6[+]:ATEXO70D1	0.0306472
AT5G40450.1	TAS3A-5'D1[+]	6543	3	2.20113	2.06487	no	NA	TAS3A-5'D1[+]:AT5G40450.1	0.0306472
AT1G09770.1	TAS3C-5'D5[+]	2826	4.5	2.75141	3.75141	no	ATCDC5	TAS3C-5'D5[+]:ATCDC5	0.055623
AT1G04300.4	TAS3C-5'D9[+]	932	3	0.550282	1	no	NA	TAS3C-5'D9[+]:AT1G04300.4	0.244474
AT3G44205.1	TAS2-3'D6[-]	1084	5	1.10056	2.10056	no	NA	TAS2-3'D6[-]:AT3G44205.1	0.244474
AT4G13710.2	TAS3B-5'D7[+]	1262	2.5	0.550282	0.738033	no	NA	TAS3B-5'D7[+]:AT4G13710.2	0.244474
AT5G54840.2	TAS4-3'D6[+]	464	5.5	1.10056	2.10056	no	ATSGP1	TAS4-3'D6[+]:ATSGP1	0.253207
AT3G04910.3	TAS1A-3'D5[+]	1936	5.5	2.20113	3.20113	no	ATWNK1	TAS1A-3'D5[+]:ATWNK1	0.290563
AT5G43960.2	TAS4-3'D3[-]	362	4.5	1.10056	2.10056	no	NA	TAS4-3'D3[-]:AT5G43960.2	0.291472
AT5G28237.1	TAS2-3'D3[+]	768	4.5	0.550282	1.55028	no	NA	TAS2-3'D3[+]:AT5G28237.1	0.29855
AT1G66330.2	TAS3C-5'D3[+]	603	3	0.550282	0.738033	no	NA	TAS3C-5'D3[+]:AT1G66330.2	0.364158
AT3G26932.2	TAS3C-5'D8[-]	912	4	0.550282	1	no	DRB3	TAS3C-5'D8[-]:DRB3	0.47618
AT4G33905.1	TAS1A-3'D8[-]	280	6	1.10056	2.10056	no	NA	TAS1A-3'D8[-]:AT4G33905.1	0.47618
AT1G56050.1	TAS3B-5'D6[+]	802	4	0.550282	1	no	NA	TAS3B-5'D6[+]:AT1G56050.1	0.55607
AT2G05920.1	TAS3C-5'D3[+]	2460	3	0.550282	0.12913	no	NA	TAS3C-5'D3[+]:AT2G05920.1	0.55607
AT4G02670.1	TAS3A-5'D7[+]	432	5	0.550282	1.55028	no	AtIDD12	TAS3A-5'D7[+]:AtIDD12	0.55607
AT4G32272.2	TAS1C-3'D2[+]	1526	4.5	0.550282	1.55028	no	NA	TAS1C-3'D2[+]:AT4G32272.2	0.583115
AT3G18390.1	TAS3C-5'D9[+]	2852	6	1.10056	2.10056	no	EMB1865	TAS3C-5'D9[+]:EMB1865	0.611319
AT3G45140.1	TAS3A-5'D8[+]	698	3.5	0.550282	0.484292	no	ATLOX2	TAS3A-5'D8[+]:ATLOX2	0.611319
AT4G18030.1	TAS1C-3'D7[-]	1758	4	0.550282	1	no	NA	TAS1C-3'D7[-]:AT4G18030.1	0.611319
AT4G24100.1	TAS3C-5'D2[-]	2625	4	0.550282	1.55028	no	NA	TAS3C-5'D2[-]:AT4G24100.1	0.611319
AT4G39960.1	TAS3C-5'D2[-]	1595	4	0.550282	1.55028	no	NA	TAS3C-5'D2[-]:AT4G39960.1	0.611319
AT5G46730.2	TAS4-3'D2[-]	597	4	0.550282	1	no	NA	TAS4-3'D2[-]:AT5G46730.2	0.611319
AT1G19650.2	TAS3A-5'D8[+]	2124	5	0.550282	1.55028	no	NA	TAS3A-5'D8[+]:AT1G19650.2	0.630894
AT1G21730.1	TAS3A-5'D5[+]	2759	5	0.550282	1.55028	no	NA	TAS3A-5'D5[+]:AT1G21730.1	0.630894
AT3G25690.3	TAS3B-5'D5[+]	1710	5	0.550282	1.55028	no	AtCHUP1	TAS3B-5'D5[+]:AtCHUP1	0.630894
AT4G33960.1	TAS3C-5'D9[-]	289	5.5	0.550282	1.55028	no	NA	TAS3C-5'D9[-]:AT4G33960.1	0.726013
AT5G06270.1	TAS3A-5'D1[+]	770	4.5	0.550282	1	no	NA	TAS3A-5'D1[+]:AT5G06270.1	0.726013
AT5G53160.2	TAS3B-5'D5[+]	321	4.5	0.550282	1	no	PYL8	TAS3B-5'D5[+]:PYL8	0.726013
AT1G70690.1	TAS3B-5'D1[+]	863	4.5	0.550282	1	no	HWI1	TAS3B-5'D1[+]:HWI1	0.751057
AT2G13540.1	TAS1C-3'D4[+]	381	5	1.10056	1.35495	no	ABH1	TAS1C-3'D4[+]:ABH1	0.766573
AT2G18910.1	TAS2-3'D3[+]	453	5	1.10056	1.35495	no	NA	TAS2-3'D3[+]:AT2G18910.1	0.766573
AT3G20540.2	TAS1A-3'D7[-]	2716	6	0.550282	1.55028	no	POLGAMMA1	TAS1A-3'D7[-]:POLGAMMA1	0.766573
AT3G54690.1	TAS3B-5'D10[+]	789	4	0.550282	0.584824	no	SETH3	TAS3B-5'D10[+]:SETH3	0.766573
AT4G29830.1	TAS3B-5'D6[+]	430	6	0.550282	1.55028	no	SKI8	TAS3B-5'D6[+]:SKI8	0.766573
AT5G03910.1	TAS3A-5'D6[+]	543	6	0.550282	1.55028	no	ABCB29	TAS3A-5'D6[+]:ABCB29	0.766573
AT5G08130.6	TAS3A-5'D1[+]	1002	4	0.550282	0.738033	no	BIM1	TAS3A-5'D1[+]:BIM1	0.766573
AT5G15920.1	TAS3B-5'D9[+]	1288	6	0.550282	1.55028	no	EMB2782	TAS3B-5'D9[+]:EMB2782	0.766573
AT5G23200.1	TAS3C-5'D3[+]	1319	5	2.20113	1.20759	no	NA	TAS3C-5'D3[+]:AT5G23200.1	0.766573
AT5G46240.1	TAS3C-5'D2[+]	1833	6	0.550282	1.55028	no	KAT1	TAS3C-5'D2[+]:KAT1	0.766573
AT1G08110.4	TAS3B-5'D5[+]	663	5	1.65085	1.26197	no	NA	TAS3B-5'D5[+]:AT1G08110.4	0.775623
AT1G11280.4	TAS3C-5'D9[+]	1789	5	0.550282	1	no	NA	TAS3C-5'D9[+]:AT1G11280.4	0.775623
AT1G18740.1	TAS3B-5'D5[+]	1137	4	1.10056	0.432929	no	NA	TAS3B-5'D5[+]:AT1G18740.1	0.775623
AT1G30620.3	TAS3A-5'D4[+]	1706	5.5	1.10056	1.35495	no	HSR8	TAS3A-5'D4[+]:HSR8	0.775623
AT1G62870.1	TAS3A-5'D2[+]	1801	5	0.550282	1	no	NA	TAS3A-5'D2[+]:AT1G62870.1	0.775623
AT2G19760.1	TAS2-3'D3[-]	645	4	0.550282	0.738033	no	PFN1	TAS2-3'D3[-]:PFN1	0.775623
AT3G54760.2	TAS3A-5'D2[+]	2594	5	1.10056	1	no	NA	TAS3A-5'D2[+]:AT3G54760.2	0.775623
AT3G56230.1	TAS3C-5'D1[+]	112	5.5	1.10056	1.35495	no	NA	TAS3C-5'D1[+]:AT3G56230.1	0.775623
AT4G17270.1	TAS3B-5'D5[+]	276	5	0.550282	1	no	NA	TAS3B-5'D5[+]:AT4G17270.1	0.775623
AT1G12320.1	TAS3C-5'D3[+]	62	4.5	0.550282	0.738033	no	NA	TAS3C-5'D3[+]:AT1G12320.1	0.780679
AT2G34660.2	TAS3C-5'D10[-]	4840	4	0.550282	0.584824	no	ABCC2	TAS3C-5'D10[-]:ABCC2	0.780679
AT3G16630.2	TAS1C-3'D7[-]	2545	5.5	3.85197	1.51571	no	ATKINESIN-13A	TAS1C-3'D7[-]:ATKINESIN-13A	0.780679
AT5G07030.1	TAS1A-3'D2[+]	965	4	0.550282	0.360389	no	NA	TAS1A-3'D2[+]:AT5G07030.1	0.780679
AT5G55125.2	TAS2-3'D3[+]	253	5.5	1.10056	1.35495	no	NA	TAS2-3'D3[+]:AT5G55125.2	0.780679
AT2G24630.1	TAS3C-5'D3[+]	2492	5.5	0.550282	1.55028	no	ATCSLC08	TAS3C-5'D3[+]:ATCSLC08	0.804011
AT3G61260.1	TAS3B-5'D7[+]	609	4.5	0.550282	1	no	NA	TAS3B-5'D7[+]:AT3G61260.1	0.804011
AT4G17230.1	TAS3B-5'D7[+]	1570	4.5	0.550282	0.738033	no	SCL13	TAS3B-5'D7[+]:SCL13	0.825888
AT1G06550.1	TAS3C-5'D10[+]	1260	6	2.20113	1.52394	no	NA	TAS3C-5'D10[+]:AT1G06550.1	0.85602
AT4G30240.1	TAS3B-5'D7[+]	117	5.5	1.10056	1	no	NA	TAS3B-5'D7[+]:AT4G30240.1	0.85602
AT1G09970.2	TAS3A-5'D6[+]	3134	6	0.550282	1.55028	no	LRR XI-23	TAS3A-5'D6[+]:LRR XI-23	0.875383
AT1G71070.1	TAS3C-5'D3[+]	1649	5	1.10056	1	no	NA	TAS3C-5'D3[+]:AT1G71070.1	0.875383
AT3G58030.4	TAS3C-5'D3[+]	1884	6	0.550282	1.55028	no	NA	TAS3C-5'D3[+]:AT3G58030.4	0.875383
AT5G45930.1	TAS3B-5'D3[-]	1098	6	0.550282	1.55028	no	CHL I2	TAS3B-5'D3[-]:CHL I2	0.875383
AT5G56790.1	TAS3B-5'D7[+]	322	6	0.550282	1.55028	no	NA	TAS3B-5'D7[+]:AT5G56790.1	0.875383
AT5G58930.1	TAS3C-5'D3[+]	1078	6	0.550282	1.55028	no	NA	TAS3C-5'D3[+]:AT5G58930.1	0.875383
AT4G04040.1	TAS1B-3'D10[+]	933	5.5	0.550282	1	no	MEE51	TAS1B-3'D10[+]:MEE51	0.877879
AT5G58720.3	TAS3A-5'D6[+]	1702	6	2.20113	1.52394	no	NA	TAS3A-5'D6[+]:AT5G58720.3	0.877879
AT3G54080.1	TAS1A-3'D10[-]	1213	5	1.10056	1	no	NA	TAS1A-3'D10[-]:AT3G54080.1	0.888525
AT3G55350.1	TAS3B-5'D7[+]	159	4	0.550282	0.203894	no	NA	TAS3B-5'D7[+]:AT3G55350.1	0.888525
AT5G13100.1	TAS1B-3'D4[-]	1010	4.5	0.550282	0.738033	no	NA	TAS1B-3'D4[-]:AT5G13100.1	0.888525
AT5G33370.2	TAS3C-5'D4[-]	1300	3.5	0.550282	0.413253	no	NA	TAS3C-5'D4[-]:AT5G33370.2	0.888525
AT1G10850.1	TAS3B-5'D7[+]	1367	5	0.550282	0.738033	no	NA	TAS3B-5'D7[+]:AT1G10850.1	0.901013
AT1G12380.1	TAS3A-5'D2[+]	1897	5	0.550282	0.738033	no	NA	TAS3A-5'D2[+]:AT1G12380.1	0.901013
AT1G14710.2	TAS3C-5'D8[-]	2242	6	1.10056	1	no	NA	TAS3C-5'D8[-]:AT1G14710.2	0.901013
AT1G23980.1	TAS2-3'D3[-]	1191	5.5	0.550282	1	no	NA	TAS2-3'D3[-]:AT1G23980.1	0.901013
AT1G75930.1	TAS3A-5'D5[+]	662	4.5	1.10056	0.559939	no	EXL6	TAS3A-5'D5[+]:EXL6	0.901013
AT2G16900.3	TAS2-3'D6[-]	1506	6	1.10056	1	no	NA	TAS2-3'D6[-]:AT2G16900.3	0.901013
AT2G23290.1	TAS4-3'D2[-]	566	6	0.550282	1	no	AtMYB70	TAS4-3'D2[-]:AtMYB70	0.901013
AT2G35880.1	TAS1A-3'D9[-]	640	6	0.550282	1	no	NA	TAS1A-3'D9[-]:AT2G35880.1	0.901013
AT2G46530.3	TAS4-3'D8[-]	1789	6	0.550282	1	no	ARF11	TAS4-3'D8[-]:ARF11	0.901013
AT3G03920.1	TAS3A-5'D5[+]	92	5.5	1.10056	1	no	NA	TAS3A-5'D5[+]:AT3G03920.1	0.901013
AT3G09980.1	TAS1B-3'D9[-]	260	5.5	1.10056	1	no	NA	TAS1B-3'D9[-]:AT3G09980.1	0.901013
AT3G17170.1	TAS3C-5'D3[+]	905	5	0.550282	0.738033	no	RFC3	TAS3C-5'D3[+]:RFC3	0.901013
AT3G52300.2	TAS3B-5'D5[+]	377	6	3.30169	1.14669	no	ATPQ	TAS3B-5'D5[+]:ATPQ	0.901013
AT3G61415.2	TAS1B-3'D4[-]	1188	6	0.550282	1	no	ASK21	TAS1B-3'D4[-]:ASK21	0.901013
AT4G02380.2	TAS3B-5'D7[+]	351	6	0.550282	1	no	AtLEA5	TAS3B-5'D7[+]:AtLEA5	0.901013
AT4G05330.1	TAS1A-3'D10[-]	943	6	0.550282	1	no	AGD13	TAS1A-3'D10[-]:AGD13	0.901013
AT4G18600.1	TAS3C-5'D7[-]	4889	5	0.550282	0.738033	no	ATSCAR-LIKE	TAS3C-5'D7[-]:ATSCAR-LIKE	0.901013
AT4G32920.3	TAS3B-5'D3[+]	3825	6	0.550282	1	no	NA	TAS3B-5'D3[+]:AT4G32920.3	0.901013
AT4G37900.1	TAS2-3'D1[-]	812	6	0.550282	1	no	NA	TAS2-3'D1[-]:AT4G37900.1	0.901013
AT5G16010.1	TAS3C-5'D9[-]	749	6	1.10056	1	no	NA	TAS3C-5'D9[-]:AT5G16010.1	0.901013
AT5G26742.3	TAS3A-5'D7[+]	1804	6	2.20113	1	no	AtRH3	TAS3A-5'D7[+]:AtRH3	0.901013
AT5G35100.2	TAS3A-5'D1[+]	389	5	0.550282	0.738033	no	NA	TAS3A-5'D1[+]:AT5G35100.2	0.901013
AT5G37020.2	TAS3A-5'D7[+]	155	6	1.10056	1	no	ARF8	TAS3A-5'D7[+]:ARF8	0.901013
AT5G67070.1	TAS3A-5'D4[-]	137	5	0.550282	0.738033	no	RALFL34	TAS3A-5'D4[-]:RALFL34	0.901013
AT2G16365.4	TAS1C-3'D9[-]	1069	6	0.550282	1	no	NA	TAS1C-3'D9[-]:AT2G16365.4	0.903627
AT1G08510.1	TAS3B-5'D7[+]	1537	4.5	0.550282	0.319516	no	FATB	TAS3B-5'D7[+]:FATB	0.930368
ATCG00830.1	TAS3B-5'D9[+]	771	4.5	2.20113	0.034872	no	RPL2.1	TAS3B-5'D9[+]:RPL2.1	0.930368
AT1G23190.1	TAS3C-5'D9[+]	1230	5	0.550282	0.584824	no	PGM3	TAS3C-5'D9[+]:PGM3	0.95296
AT1G55480.1	TAS1A-3'D9[-]	972	5	0.550282	0.584824	no	ZKT	TAS1A-3'D9[-]:ZKT	0.95296
AT1G75860.1	TAS1A-3'D3[-]	198	5.5	1.10056	0.79241	no	NA	TAS1A-3'D3[-]:AT1G75860.1	0.95296
AT2G25210.1	TAS3C-5'D4[-]	298	4	0.550282	0.118286	no	NA	TAS3C-5'D4[-]:AT2G25210.1	0.95296
AT2G39470.3	TAS3C-5'D3[+]	749	5.5	1.65085	0.828098	no	PnsL1	TAS3C-5'D3[+]:PnsL1	0.95296
AT2G41140.1	TAS3B-5'D8[+]	546	5	0.550282	0.584824	no	ATCBK3	TAS3B-5'D8[+]:ATCBK3	0.95296
AT5G13850.1	TAS3B-5'D7[+]	572	5.5	2.20113	0.853314	no	NACA3	TAS3B-5'D7[+]:NACA3	0.95296
AT1G11910.1	TAS4-3'D7[-]	1668	5	0.550282	0.360389	no	APA1	TAS4-3'D7[-]:APA1	0.955524
AT1G31330.1	TAS3C-5'D1[+]	358	5	2.75141	0.460089	no	PSAF	TAS3C-5'D1[+]:PSAF	0.955524
AT1G43170.9	TAS2-3'D8[-]	1172	5	2.20113	0.744156	no	ARP1	TAS2-3'D8[-]:ARP1	0.955524
AT1G50920.1	TAS4-3'D2[-]	1957	5	0.550282	0.484292	no	NA	TAS4-3'D2[-]:AT1G50920.1	0.955524
AT1G52190.1	TAS1C-3'D6[-]	1501	5.5	0.550282	0.738033	no	NA	TAS1C-3'D6[-]:AT1G52190.1	0.955524
AT1G56070.1	TAS1C-3'D6[-]	2382	5	2.75141	0.531881	no	LOS1	TAS1C-3'D6[-]:LOS1	0.955524
AT1G66350.1	TAS1C-3'D7[-]	1591	5	1.10056	0.48831	no	RGL	TAS1C-3'D7[-]:RGL	0.955524
AT1G74470.1	TAS3B-5'D7[+]	560	5	0.550282	0.584824	no	NA	TAS3B-5'D7[+]:AT1G74470.1	0.955524
AT2G04350.2	TAS1B-3'D7[-]	1814	6	0.550282	1	no	LACS8	TAS1B-3'D7[-]:LACS8	0.955524
AT2G20580.1	TAS3B-5'D7[+]	2900	5.5	0.550282	0.738033	no	ATRPN1A	TAS3B-5'D7[+]:ATRPN1A	0.955524
AT2G25900.2	TAS3C-5'D3[+]	1415	6	1.10056	1	no	ATCTH	TAS3C-5'D3[+]:ATCTH	0.955524
AT2G28000.1	TAS3C-5'D8[-]	2074	6	0.550282	1	no	CH-CPN60A	TAS3C-5'D8[-]:CH-CPN60A	0.955524
AT2G41070.3	TAS3B-5'D7[+]	44	6	0.00550282	1	no	ATBZIP12	TAS3B-5'D7[+]:ATBZIP12	0.955524
AT2G42870.1	TAS3C-5'D3[+]	225	5.5	0.550282	1	no	HLH1	TAS3C-5'D3[+]:HLH1	0.955524
AT3G03940.1	TAS3B-5'D1[+]	2271	5	0.550282	0.584824	no	NA	TAS3B-5'D1[+]:AT3G03940.1	0.955524
AT3G04920.1	TAS3A-5'D8[+]	255	5	1.10056	0.241334	no	NA	TAS3A-5'D8[+]:AT3G04920.1	0.955524
AT3G11450.1	TAS3C-5'D2[+]	1187	5.5	0.550282	1	no	NA	TAS3C-5'D2[+]:AT3G11450.1	0.955524
AT3G14230.3	TAS3C-5'D2[-]	1483	5	0.550282	0.738033	no	RAP2.2	TAS3C-5'D2[-]:RAP2.2	0.955524
AT3G16290.1	TAS1B-3'D7[-]	2104	6	0.550282	1	no	EMB2083	TAS1B-3'D7[-]:EMB2083	0.955524
AT3G22290.1	TAS3C-5'D2[+]	639	5.5	0.550282	1	no	NA	TAS3C-5'D2[+]:AT3G22290.1	0.955524
AT3G24100.1	TAS3C-5'D2[+]	156	6	0.550282	1	no	NA	TAS3C-5'D2[+]:AT3G24100.1	0.955524
AT4G25080.5	TAS1A-3'D9[-]	1012	5	0.550282	0.484292	no	CHLM	TAS1A-3'D9[-]:CHLM	0.955524
AT4G32390.1	TAS4-3'D9[+]	1111	5	0.550282	0.584824	no	NA	TAS4-3'D9[+]:AT4G32390.1	0.955524
AT5G22580.1	TAS1A-3'D5[-]	537	5	0.550282	0.413253	no	NA	TAS1A-3'D5[-]:AT5G22580.1	0.955524
AT5G48180.1	TAS1B-3'D7[-]	657	5.5	2.20113	1.52394	no	AtNSP5	TAS1B-3'D7[-]:AtNSP5	0.955524
AT5G61790.1	TAS2-3'D5[+]	642	5.5	1.10056	0.79241	no	ATCNX1	TAS2-3'D5[+]:ATCNX1	0.956988
AT1G57700.1	TAS3C-5'D6[-]	2576	6	0.550282	1	no	NA	TAS3C-5'D6[-]:AT1G57700.1	0.959262
AT1G02500.2	TAS3B-5'D7[-]	1326	6	1.10056	0.656193	no	AtSAM1	TAS3B-5'D7[-]:AtSAM1	0.999954
AT1G03440.1	TAS3C-5'D3[+]	308	5.5	0.550282	0.0487521	no	NA	TAS3C-5'D3[+]:AT1G03440.1	0.999954
AT1G07320.4	TAS1B-3'D4[-]	853	6	0.550282	0.167521	no	EMB2784	TAS1B-3'D4[-]:EMB2784	0.999954
AT1G07750.1	TAS4-3'D9[+]	870	6	0.550282	0.584824	no	NA	TAS4-3'D9[+]:AT1G07750.1	0.999954
AT1G11860.3	TAS3B-5'D1[+]	1447	6	0.550282	0.360389	no	NA	TAS3B-5'D1[+]:AT1G11860.3	0.999954
AT1G15270.1	TAS3B-5'D9[+]	207	6	1.10056	0.656193	no	NA	TAS3B-5'D9[+]:AT1G15270.1	0.999954
AT1G20610.1	TAS3C-5'D8[-]	256	6	0.550282	0.738033	no	CYCB2;3	TAS3C-5'D8[-]:CYCB2;3	0.999954
AT1G21600.2	TAS1B-3'D4[-]	285	6	0.550282	0.738033	no	PTAC6	TAS1B-3'D4[-]:PTAC6	0.999954
AT1G23190.1	TAS3B-5'D6[+]	1786	6	0.550282	0.484292	no	PGM3	TAS3B-5'D6[+]:PGM3	0.999954
AT1G26290.1	TAS3C-5'D3[+]	354	6	0.550282	0.738033	no	NA	TAS3C-5'D3[+]:AT1G26290.1	0.999954
AT1G44170.3	TAS4-3'D9[+]	870	6	0.550282	0.738033	no	ALDH3H1	TAS4-3'D9[+]:ALDH3H1	0.999954
AT1G45000.2	TAS3C-5'D5[+]	1032	6	0.550282	0.584824	no	NA	TAS3C-5'D5[+]:AT1G45000.2	0.999954
AT1G53910.3	TAS3C-5'D9[+]	805	6	1.10056	0.79241	no	RAP2.12	TAS3C-5'D9[+]:RAP2.12	0.999954
AT1G55690.3	TAS3C-5'D8[-]	2594	6	1.10056	0.79241	no	NA	TAS3C-5'D8[-]:AT1G55690.3	0.999954
AT1G57720.2	TAS3B-5'D8[+]	1181	6	0.841931	0.428188	no	NA	TAS3B-5'D8[+]:AT1G57720.2	0.999954
AT1G64230.5	TAS3C-5'D9[+]	777	6	1.65085	0.616235	no	UBC28	TAS3C-5'D9[+]:UBC28	0.999954
AT1G68560.1	TAS1A-3'D7[+]	2201	5.5	0.550282	0.584824	no	ATXYL1	TAS1A-3'D7[+]:ATXYL1	0.999954
AT1G69610.1	TAS3C-5'D3[+]	419	5.5	0.0330169	0.666341	no	NA	TAS3C-5'D3[+]:AT1G69610.1	0.999954
AT1G70100.4	TAS3C-5'D3[+]	839	6	0.550282	0.484292	no	NA	TAS3C-5'D3[+]:AT1G70100.4	0.999954
AT2G01250.2	TAS3B-5'D7[+]	156	5.5	1.10056	0.432929	no	NA	TAS3B-5'D7[+]:AT2G01250.2	0.999954
AT2G19480.3	TAS3A-5'D1[+]	1195	5.5	0.550282	0.26044	no	NAP1;2	TAS3A-5'D1[+]:NAP1;2	0.999954
AT2G21660.2	TAS4-3'D2[-]	542	5.5	1.65085	0.27037	no	ATGRP7	TAS4-3'D2[-]:ATGRP7	0.999954
AT2G28910.1	TAS3B-5'D7[+]	560	5.5	0.550282	0.484292	no	CXIP4	TAS3B-5'D7[+]:CXIP4	0.999954
AT2G28910.1	TAS3B-5'D7[+]	809	6	0.550282	0.484292	no	CXIP4	TAS3B-5'D7[+]:CXIP4	0.999954
AT2G30520.3	TAS1A-3'D10[-]	1670	5.5	0.550282	0.584824	no	RPT2	TAS1A-3'D10[-]:RPT2	0.999954
AT2G30570.1	TAS3B-5'D7[+]	263	6	1.65085	0.202259	no	PSBW	TAS3B-5'D7[+]:PSBW	0.999954
AT2G36160.1	TAS1B-3'D4[-]	536	5.5	0.550282	0.178112	no	NA	TAS1B-3'D4[-]:AT2G36160.1	0.999954
AT2G42040.1	TAS3C-5'D3[+]	913	6	0.550282	0.738033	no	NA	TAS3C-5'D3[+]:AT2G42040.1	0.999954
AT2G45960.3	TAS1B-3'D4[+]	1185	6	0.550282	0.413253	no	ATHH2	TAS1B-3'D4[+]:ATHH2	0.999954
AT3G08550.1	TAS1B-3'D5[+]	1300	6	0.550282	0.738033	no	ABI8	TAS1B-3'D5[+]:ABI8	0.999954
AT3G10570.1	TAS4-3'D9[+]	1554	6	0.550282	0.484292	no	CYP77A6	TAS4-3'D9[+]:CYP77A6	0.999954
AT3G17998.1	TAS3A-5'D1[+]	1550	6	1.10056	0.48831	no	CPuORF30	TAS3A-5'D1[+]:CPuORF30	0.999954
AT3G18000.1	TAS3A-5'D1[+]	1550	6	1.10056	0.48831	no	NMT1	TAS3A-5'D1[+]:NMT1	0.999954
AT3G29200.1	TAS4-3'D9[+]	1325	5.5	0.550282	0.584824	no	ATCM1	TAS4-3'D9[+]:ATCM1	0.999954
AT3G46430.1	TAS3C-5'D3[+]	86	6	0.550282	0.216924	no	NA	TAS3C-5'D3[+]:AT3G46430.1	0.999954
AT3G50670.2	TAS4-3'D9[+]	1708	6	0.550282	0.738033	no	U1-70K	TAS4-3'D9[+]:U1-70K	0.999954
AT3G60750.2	TAS3B-5'D7[+]	2144	5.5	1.10056	0.202859	no	NA	TAS3B-5'D7[+]:AT3G60750.2	0.999954
AT3G62840.2	TAS3A-5'D1[+]	162	6	0.550282	0.484292	no	NA	TAS3A-5'D1[+]:AT3G62840.2	0.999954
AT4G01100.2	TAS3B-5'D2[+]	1120	6	0.550282	0.738033	no	ADNT1	TAS3B-5'D2[+]:ADNT1	0.999954
AT4G10060.1	TAS3C-5'D3[+]	2749	5.5	0.550282	0.584824	no	NA	TAS3C-5'D3[+]:AT4G10060.1	0.999954
AT4G19120.2	TAS2-3'D3[+]	1851	6	0.550282	0.413253	no	ERD3	TAS2-3'D3[+]:ERD3	0.999954
AT4G21660.2	TAS3B-5'D7[+]	1739	6	0.550282	0.584824	no	NA	TAS3B-5'D7[+]:AT4G21660.2	0.999954
AT4G21960.1	TAS3B-5'D7[+]	600	6	0.550282	0.12347	no	PRXR1	TAS3B-5'D7[+]:PRXR1	0.999954
AT4G26630.2	TAS3C-5'D3[+]	836	6	0.550282	0.484292	no	NA	TAS3C-5'D3[+]:AT4G26630.2	0.999954
AT4G28750.1	TAS3A-5'D7[+]	329	6	1.11157	0.215367	no	PSAE-1	TAS3A-5'D7[+]:PSAE-1	0.999954
AT4G29360.2	TAS3A-5'D1[+]	1381	6	0.550282	0.484292	no	NA	TAS3A-5'D1[+]:AT4G29360.2	0.999954
AT4G34160.1	TAS3C-5'D9[+]	103	6	0.550282	0.584824	no	CYCD3	TAS3C-5'D9[+]:CYCD3	0.999954
AT4G34620.1	TAS1C-3'D7[-]	524	5.5	0.550282	0.0601754	no	SSR16	TAS1C-3'D7[-]:SSR16	0.999954
AT4G38630.1	TAS3B-5'D7[+]	1203	6	0.550282	0.584824	no	ATMCB1	TAS3B-5'D7[+]:ATMCB1	0.999954
AT5G01410.1	TAS4-3'D6[+]	694	6	2.20113	0.853314	no	ATPDX1	TAS4-3'D6[+]:ATPDX1	0.999954
AT5G03670.1	TAS3A-5'D1[+]	1323	6	0.550282	0.738033	no	TRM28	TAS3A-5'D1[+]:TRM28	0.999954
AT5G07530.2	TAS3B-5'D6[+]	635	5.5	5.50282	0.0017691	no	ATGRP-7	TAS3B-5'D6[+]:ATGRP-7	0.999954
AT5G09810.1	TAS1C-3'D5[+]	1319	5.5	1.10056	0.174965	no	ACT7	TAS1C-3'D5[+]:ACT7	0.999954
AT5G15350.1	TAS1C-3'D5[-]	368	6	0.550282	0.738033	no	AtENODL17	TAS1C-3'D5[-]:AtENODL17	0.999954
AT5G26600.2	TAS3A-5'D5[+]	798	6	0.550282	0.738033	no	NA	TAS3A-5'D5[+]:AT5G26600.2	0.999954
AT5G44210.1	TAS4-3'D2[-]	308	6	0.550282	0.584824	no	ATERF-9	TAS4-3'D2[-]:ATERF-9	0.999954
AT5G65220.1	TAS3B-5'D9[+]	450	6	1.10056	0.202859	no	NA	TAS3B-5'D9[+]:AT5G65220.1	0.999954
ATCG00380.1	TAS3B-5'D8[+]	235	6	2.20113	0.421014	no	RPS4	TAS3B-5'D8[+]:RPS4	0.999954

## Sheet: dcl234 (biorep #1)
Target transcript	tasiRNA	tasiRNA slice site position in target transcript	Allen score of sRNA:target duplex	Slice site RPM	Slice site RPM + 1/Maximum adjacent site RPM + 1	Previously verified by 5' RACE?	Target gene common name	Interaction name	P-value adjusted for multiple testing
AT3G48060.1	TAS3C-5'D4[+]	2734	2	0.408366	1.40837	no	NA	TAS3C-5'D4[+]:AT3G48060.1	0.231839
AT1G66330.2	TAS3C-5'D3[+]	603	3	0.560044	0.957053	no	NA	TAS3C-5'D3[+]:AT1G66330.2	0.930141
AT1G71440.1	TAS3B-5'D5[+]	1289	4.5	0.705889	1.70589	no	PFI	TAS3B-5'D5[+]:PFI	0.930141
AT1G78895.1	TAS3A-5'D9[-]	218	3.5	0.542543	1.54254	no	NA	TAS3A-5'D9[-]:AT1G78895.1	0.930141
AT2G25840.3	TAS3B-5'D7[+]	1261	4	0.735058	1.73506	no	OVA4	TAS3B-5'D7[+]:OVA4	0.930141
AT2G25930.1	TAS3C-5'D10[+]	2440	5	17.163	3.98943	no	ELF3	TAS3C-5'D10[+]:ELF3	0.930141
AT2G33990.1	TAS1A-3'D9[-]	803	4	0.67672	1.67672	no	iqd9	TAS1A-3'D9[-]:iqd9	0.930141
AT2G39675.1	TAS1A-3'D10[-]	492	3	1.2076	1.0558	no	TAS1c	TAS1A-3'D10[-]:TAS1c	0.930141
AT3G24490.1	TAS3A-5'D4[-]	117	2.5	0.484205	0.809169	no	NA	TAS3A-5'D4[-]:AT3G24490.1	0.930141
AT4G21430.1	TAS3C-5'D1[+]	1639	5	1.03842	2.03842	no	B160	TAS3C-5'D1[+]:B160	0.930141
AT5G23080.2	TAS3B-5'D7[+]	2408	3	0.758393	0.772038	no	TGH	TAS3B-5'D7[+]:TGH	0.930141
AT1G14570.4	TAS3B-5'D4[-]	1530	3	0.542543	0.874345	no	NA	TAS3B-5'D4[-]:AT1G14570.4	0.969447
AT1G61100.2	TAS3A-5'D7[+]	823	4	0.577546	0.96779	no	NA	TAS3A-5'D7[+]:AT1G61100.2	0.969447
AT2G40460.1	TAS3A-5'D6[+]	336	6	0.933407	1.93341	no	NA	TAS3A-5'D6[+]:AT2G40460.1	0.969447
AT3G56230.1	TAS3C-5'D1[+]	112	5.5	2.31018	1.73832	no	NA	TAS3C-5'D1[+]:AT3G56230.1	0.969447
AT4G22590.1	TAS3B-5'D10[+]	902	5	0.58338	1.58338	no	TPPG	TAS3B-5'D10[+]:TPPG	0.969447
AT4G22592.1	TAS3B-5'D10[+]	902	5	0.58338	1.58338	no	CPuORF27	TAS3B-5'D10[+]:CPuORF27	0.969447
AT5G12010.1	TAS3A-5'D1[+]	95	5.5	0.775895	1.7759	no	NA	TAS3A-5'D1[+]:AT5G12010.1	0.969447
ATCG01040.1	TAS1B-3'D9[+]	199	3.5	1.23676	0.0745301	no	YCF5	TAS1B-3'D9[+]:YCF5	0.995799
AT5G46730.2	TAS4-3'D2[-]	597	4	0.443368	0.831885	no	NA	TAS4-3'D2[-]:AT5G46730.2	0.999088
AT1G01090.1	TAS3C-5'D5[+]	1001	5.5	1.14926	0.479448	no	PDH-E1 ALPHA	TAS3C-5'D5[+]:PDH-E1 ALPHA	0.999877
AT1G03080.1	TAS1A-3'D9[-]	5175	5.5	0.624216	0.414052	no	NET1D	TAS1A-3'D9[-]:NET1D	0.999877
AT1G03970.1	TAS3A-5'D6[+]	408	6	0.355862	0.423794	no	GBF4	TAS3A-5'D6[+]:GBF4	0.999877
AT1G07320.4	TAS1B-3'D4[-]	853	6	0.38503	0.118742	no	EMB2784	TAS1B-3'D4[-]:EMB2784	0.999877
AT1G08820.2	TAS3A-5'D1[+]	111	5.5	1.09675	1.35928	no	VAP27-2	TAS3A-5'D1[+]:VAP27-2	0.999877
AT1G09770.1	TAS3A-5'D8[+]	2825	6	0.653385	0.927967	no	ATCDC5	TAS3A-5'D8[+]:ATCDC5	0.999877
AT1G10670.4	TAS4-3'D4[+]	690	5.5	0.402532	0.674537	no	ACLA-1	TAS4-3'D4[+]:ACLA-1	0.999877
AT1G11910.1	TAS4-3'D7[-]	1668	5	1.6743	0.616634	no	APA1	TAS4-3'D7[-]:APA1	0.999877
AT1G12240.1	TAS1C-3'D1[-]	478	5	0.711723	0.479895	no	ATBETAFRUCT4	TAS1C-3'D1[-]:ATBETAFRUCT4	0.999877
AT1G12310.1	TAS1B-3'D2[+]	499	5.5	1.54012	0.606076	no	NA	TAS1B-3'D2[+]:AT1G12310.1	0.999877
AT1G14740.1	TAS2-3'D1[-]	1668	6	1.43511	0.972053	no	TTA1	TAS2-3'D1[-]:TTA1	0.999877
AT1G15270.1	TAS3B-5'D9[+]	207	6	0.536709	0.171448	no	NA	TAS3B-5'D9[+]:AT1G15270.1	0.999877
AT1G15340.2	TAS3B-5'D9[+]	861	6	0.635884	0.45271	no	MBD10	TAS3B-5'D9[+]:MBD10	0.999877
AT1G17210.1	TAS3A-5'D2[-]	2836	4.5	0.939241	1.02783	no	ATILP1	TAS3A-5'D2[-]:ATILP1	0.999877
AT1G20440.1	TAS3C-5'D3[+]	485	5.5	0.600881	0.198936	no	AtCOR47	TAS3C-5'D3[+]:AtCOR47	0.999877
AT1G20840.1	TAS3A-5'D1[+]	802	5.5	0.956742	0.662332	no	AtTMT1	TAS3A-5'D1[+]:AtTMT1	0.999877
AT1G22160.1	TAS1A-3'D3[+]	327	5.5	0.396698	0.288655	no	NA	TAS1A-3'D3[+]:AT1G22160.1	0.999877
AT1G22380.1	TAS4-3'D7[+]	903	5.5	0.408366	0.348154	no	AtUGT85A3	TAS4-3'D7[+]:AtUGT85A3	0.999877
AT1G25230.1	TAS3A-5'D3[+]	250	5.5	1.16093	0.281596	no	NA	TAS3A-5'D3[+]:AT1G25230.1	0.999877
AT1G31330.1	TAS3C-5'D1[+]	358	5	0.67672	0.144255	no	PSAF	TAS3C-5'D1[+]:PSAF	0.999877
AT1G34030.1	TAS3C-5'D2[+]	355	6	0.635884	0.331689	no	NA	TAS3C-5'D2[+]:AT1G34030.1	0.999877
AT1G43170.9	TAS2-3'D8[-]	1172	5	0.455036	0.292598	no	ARP1	TAS2-3'D8[-]:ARP1	0.999877
AT1G48920.1	TAS4-3'D9[+]	1286	6	1.24843	0.85759	no	ATNUC-L1	TAS4-3'D9[+]:ATNUC-L1	0.999877
AT1G52280.1	TAS3A-5'D10[-]	391	6	0.688388	0.743204	no	AtRABG3d	TAS3A-5'D10[-]:AtRABG3d	0.999877
AT1G52670.1	TAS2-3'D3[-]	1010	4.5	0.892571	1.05188	no	NA	TAS2-3'D3[-]:AT1G52670.1	0.999877
AT1G55480.1	TAS1A-3'D9[-]	972	5	0.595047	0.726365	no	ZKT	TAS1A-3'D9[-]:ZKT	0.999877
AT1G56070.1	TAS1C-3'D6[-]	2382	5	0.700055	0.364535	no	LOS1	TAS1C-3'D6[-]:LOS1	0.999877
AT1G57610.3	TAS1A-3'D7[-]	892	6	0.390864	0.804328	no	NA	TAS1A-3'D7[-]:AT1G57610.3	0.999877
AT1G60420.1	TAS3A-5'D6[+]	1529	6	0.46087	0.774284	no	NA	TAS3A-5'D6[+]:AT1G60420.1	0.999877
AT1G65295.1	TAS4-3'D9[+]	215	4.5	1.54596	1.1442	no	NA	TAS4-3'D9[+]:AT1G65295.1	0.999877
AT1G65960.2	TAS3B-5'D6[+]	1452	6	0.606715	0.387137	no	GAD2	TAS3B-5'D6[+]:GAD2	0.999877
AT1G67230.1	TAS1C-3'D5[-]	1584	6	0.641717	0.63753	no	CRWN1	TAS1C-3'D5[-]:CRWN1	0.999877
AT1G72150.1	TAS1C-3'D8[-]	1004	6	0.431701	0.434813	no	PATL1	TAS1C-3'D8[-]:PATL1	0.999877
AT1G73220.1	TAS3C-5'D7[-]	714	6	0.355862	0.58335	no	AtOCT1	TAS3C-5'D7[-]:AtOCT1	0.999877
AT1G74050.1	TAS4-3'D8[+]	822	4.5	0.723391	0.367242	no	NA	TAS4-3'D8[+]:AT1G74050.1	0.999877
AT1G75940.1	TAS2-3'D3[+]	1613	6	3.7628	1.09378	no	ATA27	TAS2-3'D3[+]:ATA27	0.999877
AT1G75950.1	TAS4-3'D4[+]	215	6	1.79681	0.935601	no	ASK1	TAS4-3'D4[+]:ASK1	0.999877
AT1G76400.1	TAS1A-3'D3[-]	1879	5	0.437535	0.532888	no	NA	TAS1A-3'D3[-]:AT1G76400.1	0.999877
AT1G79060.1	TAS1A-3'D7[-]	1110	5.5	1.01508	0.898546	no	NA	TAS1A-3'D7[-]:AT1G79060.1	0.999877
AT1G80600.1	TAS3C-5'D4[+]	675	6	0.315025	0.546574	no	WIN1	TAS3C-5'D4[+]:WIN1	0.999877
AT2G01100.3	TAS4-3'D8[-]	952	6	0.484205	0.806604	no	NA	TAS4-3'D8[-]:AT2G01100.3	0.999877
AT2G01250.2	TAS3B-5'D7[+]	156	5.5	0.641717	0.575002	no	NA	TAS3B-5'D7[+]:AT2G01250.2	0.999877
AT2G02180.1	TAS3C-5'D9[+]	1100	4.5	0.431701	1.03807	no	TOM3	TAS3C-5'D9[+]:TOM3	0.999877
AT2G07687.1	TAS1C-3'D4[-]	266	5	0.746726	0.871876	no	NA	TAS1C-3'D4[-]:AT2G07687.1	0.999877
AT2G10410.1	TAS3A-5'D4[-]	62	5	0.565878	0.147772	no	SADHU1-1	TAS3A-5'D4[-]:SADHU1-1	0.999877
AT2G16640.1	TAS3B-5'D8[+]	865	6	0.694222	1.05446	no	ATTOC132	TAS3B-5'D8[+]:ATTOC132	0.999877
AT2G16730.1	TAS3C-5'D3[+]	47	5	0.565878	0.864697	no	BGAL13	TAS3C-5'D3[+]:BGAL13	0.999877
AT2G17020.1	TAS3C-5'D4[-]	2139	4	0.600881	0.813286	no	NA	TAS3C-5'D4[-]:AT2G17020.1	0.999877
AT2G18900.1	TAS1A-3'D7[-]	2340	6	0.379197	0.382292	no	NA	TAS1A-3'D7[-]:AT2G18900.1	0.999877
AT2G19110.1	TAS3C-5'D9[+]	3121	6	0.466704	0.433165	no	ATHMA4	TAS3C-5'D9[+]:ATHMA4	0.999877
AT2G21270.3	TAS4-3'D5[+]	345	5.5	0.647551	0.979197	no	UFD1	TAS4-3'D5[+]:UFD1	0.999877
AT2G21660.2	TAS4-3'D2[-]	542	5.5	11.4692	0.29668	no	ATGRP7	TAS4-3'D2[-]:ATGRP7	0.999877
AT2G22795.1	TAS3B-5'D9[+]	1697	5.5	1.05592	0.767097	no	NA	TAS3B-5'D9[+]:AT2G22795.1	0.999877
AT2G24150.1	TAS1C-3'D8[+]	291	6	0.694222	0.989776	no	HHP3	TAS1C-3'D8[+]:HHP3	0.999877
AT2G25900.2	TAS3C-5'D3[+]	1415	6	0.781729	0.579079	no	ATCTH	TAS3C-5'D3[+]:ATCTH	0.999877
AT2G27510.1	TAS3A-5'D7[+]	268	6	0.612548	0.692048	no	ATFD3	TAS3A-5'D7[+]:ATFD3	0.999877
AT2G28930.3	TAS3A-5'D2[-]	1489	6	0.437535	0.455132	no	APK1B	TAS3A-5'D2[-]:APK1B	0.999877
AT2G29090.2	TAS3C-5'D3[+]	1000	5.5	1.07342	0.908029	no	CYP707A2	TAS3C-5'D3[+]:CYP707A2	0.999877
AT2G29960.2	TAS3B-5'D1[+]	277	5	1.16676	0.934577	no	ATCYP5	TAS3B-5'D1[+]:ATCYP5	0.999877
AT2G30050.1	TAS1C-3'D6[-]	181	6	0.320859	0.758725	no	NA	TAS1C-3'D6[-]:AT2G30050.1	0.999877
AT2G30520.3	TAS1A-3'D10[-]	1670	5.5	0.635884	0.525698	no	RPT2	TAS1A-3'D10[-]:RPT2	0.999877
AT2G30570.1	TAS3B-5'D7[+]	263	6	6.27133	0.242238	no	PSBW	TAS3B-5'D7[+]:PSBW	0.999877
AT2G31360.1	TAS3B-5'D9[+]	1005	6	0.624216	0.731873	no	ADS2	TAS3B-5'D9[+]:ADS2	0.999877
AT2G36160.1	TAS1B-3'D4[-]	536	5.5	0.490039	0.319903	no	NA	TAS1B-3'D4[-]:AT2G36160.1	0.999877
AT2G37340.3	TAS4-3'D5[+]	442	6	0.548377	0.212602	no	AT-RS2Z33	TAS4-3'D5[+]:AT-RS2Z33	0.999877
AT2G39730.3	TAS2-3'D8[-]	283	5	1.07342	0.397372	no	RCA	TAS2-3'D8[-]:RCA	0.999877
AT2G39770.2	TAS4-3'D10[-]	1243	6	0.361695	0.408486	no	CYT1	TAS4-3'D10[-]:CYT1	0.999877
AT2G40000.1	TAS3C-5'D3[+]	471	6	0.612548	0.668613	no	ATHSPRO2	TAS3C-5'D3[+]:ATHSPRO2	0.999877
AT2G40205.1	TAS3B-5'D9[-]	105	4	1.09092	0.485385	no	NA	TAS3B-5'D9[-]:AT2G40205.1	0.999877
AT2G41905.1	TAS4-3'D9[+]	92	6	0.770061	0.384842	no	NA	TAS4-3'D9[+]:AT2G41905.1	0.999877
AT2G42600.2	TAS2-3'D9[+]	2642	6	0.548377	0.261901	no	ATPPC2	TAS2-3'D9[+]:ATPPC2	0.999877
AT2G46820.2	TAS3B-5'D9[-]	803	4.5	1.16676	0.913882	no	PSAP	TAS3B-5'D9[-]:PSAP	0.999877
AT3G02230.1	TAS3A-5'D4[-]	1223	3.5	1.26593	0.645835	no	ATRGP1	TAS3A-5'D4[-]:ATRGP1	0.999877
AT3G03940.1	TAS3A-5'D3[+]	1130	4	0.589213	0.694201	no	NA	TAS3A-5'D3[+]:AT3G03940.1	0.999877
AT3G04610.1	TAS3C-5'D2[+]	560	6	0.379197	0.774078	no	FLK	TAS3C-5'D2[+]:FLK	0.999877
AT3G04920.1	TAS3B-5'D8[+]	253	6	1.77931	0.617586	no	NA	TAS3B-5'D8[+]:AT3G04920.1	0.999877
AT3G05020.1	TAS3C-5'D3[+]	258	5.5	0.606715	0.313894	no	ACP	TAS3C-5'D3[+]:ACP	0.999877
AT3G07850.1	TAS3C-5'D8[-]	86	6	0.274188	0.268186	no	NA	TAS3C-5'D8[-]:AT3G07850.1	0.999877
AT3G08510.3	TAS1A-3'D7[-]	1515	6	0.548377	0.701385	no	ATPLC2	TAS1A-3'D7[-]:ATPLC2	0.999877
AT3G09150.3	TAS3B-5'D9[+]	241	5	0.402532	1.03442	no	ATHY2	TAS3B-5'D9[+]:ATHY2	0.999877
AT3G10320.1	TAS1A-3'D6[+]	1030	6	0.501706	1.0489	no	NA	TAS1A-3'D6[+]:AT3G10320.1	0.999877
AT3G11450.1	TAS3C-5'D2[+]	1187	5.5	1.16093	0.961084	no	NA	TAS3C-5'D2[+]:AT3G11450.1	0.999877
AT3G11560.4	TAS3A-5'D6[+]	1251	5	0.688388	1.38202	no	NA	TAS3A-5'D6[+]:AT3G11560.4	0.999877
AT3G11980.1	TAS3B-5'D7[+]	1817	5.5	0.525042	0.455891	no	FAR2	TAS3B-5'D7[+]:FAR2	0.999877
AT3G12020.2	TAS4-3'D8[-]	3302	5	0.600881	0.938444	no	NA	TAS4-3'D8[-]:AT3G12020.2	0.999877
AT3G12260.1	TAS3A-5'D4[-]	259	6	0.449202	0.502441	no	NA	TAS3A-5'D4[-]:AT3G12260.1	0.999877
AT3G13700.2	TAS3B-5'D9[+]	1476	6	0.344194	1.34419	no	NA	TAS3B-5'D9[+]:AT3G13700.2	0.999877
AT3G13710.1	TAS3B-5'D9[+]	1570	6	0.344194	1.34419	no	PRA1.F4	TAS3B-5'D9[+]:PRA1.F4	0.999877
AT3G14040.1	TAS3C-5'D8[-]	89	6	0.140011	0.39685	no	NA	TAS3C-5'D8[-]:AT3G14040.1	0.999877
AT3G15530.2	TAS4-3'D4[-]	423	5.5	0.700055	1.00691	no	NA	TAS4-3'D4[-]:AT3G15530.2	0.999877
AT3G18990.1	TAS1B-3'D4[+]	1033	5.5	0.466704	0.887092	no	REM39	TAS1B-3'D4[+]:REM39	0.999877
AT3G20660.1	TAS1A-3'D3[-]	1712	5	0.565878	0.964082	no	AtOCT4	TAS1A-3'D3[-]:AtOCT4	0.999877
AT3G26590.1	TAS3B-5'D1[+]	1513	6	0.711723	0.720186	no	NA	TAS3B-5'D1[+]:AT3G26590.1	0.999877
AT3G29575.4	TAS3B-5'D7[+]	272	6	0.600881	0.563001	no	AFP3	TAS3B-5'D7[+]:AFP3	0.999877
AT3G43610.1	TAS3C-5'D3[+]	3234	6	0.705889	1	no	NA	TAS3C-5'D3[+]:AT3G43610.1	0.999877
AT3G46430.1	TAS3C-5'D3[+]	86	6	1.6743	0.940502	no	NA	TAS3C-5'D3[+]:AT3G46430.1	0.999877
AT3G47470.1	TAS4-3'D4[-]	291	5.5	0.840067	0.0955105	no	CAB4	TAS4-3'D4[-]:CAB4	0.999877
AT3G52300.2	TAS3B-5'D5[+]	377	6	0.443368	0.465577	no	ATPQ	TAS3B-5'D5[+]:ATPQ	0.999877
AT3G57000.1	TAS1C-3'D10[+]	307	6	0.326693	0.470435	no	NA	TAS1C-3'D10[+]:AT3G57000.1	0.999877
AT3G57550.2	TAS3C-5'D9[+]	915	5.5	0.320859	0.756191	no	AGK2	TAS3C-5'D9[+]:AGK2	0.999877
AT3G57800.2	TAS3C-5'D6[+]	163	5.5	0.449202	0.885883	no	NA	TAS3C-5'D6[+]:AT3G57800.2	0.999877
AT3G58800.1	TAS4-3'D8[-]	620	5	0.63005	1.06886	no	NA	TAS4-3'D8[-]:AT3G58800.1	0.999877
AT3G62130.1	TAS1B-3'D4[-]	1266	4.5	0.350028	0.733684	no	AtLCD	TAS1B-3'D4[-]:AtLCD	0.999877
AT4G01250.1	TAS2-3'D9[+]	695	6	0.770061	1.04837	no	AtWRKY22	TAS2-3'D9[+]:AtWRKY22	0.999877
AT4G04040.1	TAS1B-3'D10[+]	933	5.5	0.326693	0.543515	no	MEE51	TAS1B-3'D10[+]:MEE51	0.999877
AT4G07410.2	TAS1C-3'D7[-]	2686	5.5	0.910072	1.16346	no	PCN	TAS1C-3'D7[-]:PCN	0.999877
AT4G11260.1	TAS3B-5'D9[-]	1239	6	0.565878	0.692836	no	ATSGT1B	TAS3B-5'D9[-]:ATSGT1B	0.999877
AT4G13270.1	TAS4-3'D7[-]	693	6	1.34177	1.04695	no	NA	TAS4-3'D7[-]:AT4G13270.1	0.999877
AT4G15260.1	TAS3A-5'D4[+]	1272	6	0.63005	1.63005	no	NA	TAS3A-5'D4[+]:AT4G15260.1	0.999877
AT4G17210.1	TAS3A-5'D1[+]	63	6	0.571712	1.57171	no	NA	TAS3A-5'D1[+]:AT4G17210.1	0.999877
AT4G17870.1	TAS3C-5'D4[+]	145	6	0.735058	0.739074	no	PYR1	TAS3C-5'D4[+]:PYR1	0.999877
AT4G18593.1	TAS1B-3'D4[-]	340	5.5	0.985911	0.949779	no	NA	TAS1B-3'D4[-]:AT4G18593.1	0.999877
AT4G21660.2	TAS3B-5'D7[+]	1739	6	0.58338	0.711599	no	NA	TAS3B-5'D7[+]:AT4G21660.2	0.999877
AT4G22220.1	TAS3C-5'D3[+]	643	5.5	0.560044	0.481468	no	ATISU1	TAS3C-5'D3[+]:ATISU1	0.999877
AT4G22670.1	TAS3C-5'D3[-]	1568	4.5	0.606715	1.00732	no	AtHip1	TAS3C-5'D3[-]:AtHip1	0.999877
AT4G23710.1	TAS1A-3'D3[+]	89	6	0.180848	0.514508	no	VAG2	TAS1A-3'D3[+]:VAG2	0.999877
AT4G26630.2	TAS3B-5'D9[+]	2186	6	0.758393	0.469922	no	NA	TAS3B-5'D9[+]:AT4G26630.2	0.999877
AT4G28740.1	TAS2-3'D9[-]	1176	5.5	0.694222	0.993161	no	NA	TAS2-3'D9[-]:AT4G28740.1	0.999877
AT4G28750.1	TAS3A-5'D7[+]	329	6	0.513374	0.135224	no	PSAE-1	TAS3A-5'D7[+]:PSAE-1	0.999877
AT4G28760.2	TAS3A-5'D9[+]	2193	4.5	0.542543	0.874345	no	TRM20	TAS3A-5'D9[+]:TRM20	0.999877
AT4G29950.2	TAS1C-3'D5[-]	712	5.5	0.682554	1.03965	no	NA	TAS1C-3'D5[-]:AT4G29950.2	0.999877
AT4G30080.1	TAS1B-3'D5[+]	2211	6	0.659219	0.451872	no	ARF16	TAS1B-3'D5[+]:ARF16	0.999877
AT4G30920.1	TAS1A-3'D3[-]	555	4.5	0.781729	0.856909	no	AtLAP2	TAS1A-3'D3[-]:AtLAP2	0.999877
AT4G31300.3	TAS3B-5'D1[+]	411	5	0.857568	1.0564	no	PBA1	TAS3B-5'D1[+]:PBA1	0.999877
AT4G32120.1	TAS1A-3'D5[-]	855	6	0.886737	1.4476	no	NA	TAS1A-3'D5[-]:AT4G32120.1	0.999877
AT4G33150.3	TAS3C-5'D3[+]	1710	6	1.08509	0.297496	no	LKR	TAS3C-5'D3[+]:LKR	0.999877
AT4G34860.2	TAS1C-3'D10[+]	1507	5.5	0.665053	0.734821	no	A/N-InvB	TAS1C-3'D10[+]:A/N-InvB	0.999877
AT4G39080.1	TAS3A-5'D1[+]	1992	6	0.635884	0.886226	no	VHA-A3	TAS3A-5'D1[+]:VHA-A3	0.999877
AT5G01210.1	TAS3B-5'D5[+]	1449	6	0.320859	0.711069	no	NA	TAS3B-5'D5[+]:AT5G01210.1	0.999877
AT5G04930.1	TAS1C-3'D2[-]	2981	5.5	0.997579	1.36739	no	ALA1	TAS1C-3'D2[-]:ALA1	0.999877
AT5G05690.3	TAS4-3'D9[+]	702	5.5	0.746726	0.673727	no	CBB3	TAS4-3'D9[+]:CBB3	0.999877
AT5G07530.2	TAS3C-5'D3[+]	165	5.5	0.956742	0.166673	no	ATGRP-7	TAS3C-5'D3[+]:ATGRP-7	0.999877
AT5G07530.2	TAS3B-5'D6[+]	635	5.5	9.87078	0.00197098	no	ATGRP-7	TAS3B-5'D6[+]:ATGRP-7	0.999877
AT5G10450.4	TAS4-3'D9[+]	519	6	2.141	0.729149	no	14-3-3lambda	TAS4-3'D9[+]:14-3-3lambda	0.999877
AT5G10730.1	TAS3B-5'D5[+]	862	6	0.834233	0.151496	no	NA	TAS3B-5'D5[+]:AT5G10730.1	0.999877
AT5G10860.1	TAS3C-5'D7[-]	800	5.5	0.379197	0.259964	no	CBSX3	TAS3C-5'D7[-]:CBSX3	0.999877
AT5G13400.1	TAS1A-3'D9[-]	1750	6	0.50754	0.19322	no	NA	TAS1A-3'D9[-]:AT5G13400.1	0.999877
AT5G16010.1	TAS3C-5'D9[-]	749	6	0.653385	0.986083	no	NA	TAS3C-5'D9[-]:AT5G16010.1	0.999877
AT5G16510.2	TAS2-3'D7[+]	977	5.5	0.536709	0.531706	no	RGP5	TAS2-3'D7[+]:RGP5	0.999877
AT5G17910.2	TAS3C-5'D9[+]	573	6	0.542543	1.13281	no	NA	TAS3C-5'D9[+]:AT5G17910.2	0.999877
AT5G19990.1	TAS3B-5'D6[+]	963	4.5	0.373363	0.914535	no	ATSUG1	TAS3B-5'D6[+]:ATSUG1	0.999877
AT5G20190.1	TAS1A-3'D6[+]	644	5.5	0.735058	0.709119	no	NA	TAS1A-3'D6[+]:AT5G20190.1	0.999877
AT5G22000.3	TAS3A-5'D6[+]	1212	4	0.443368	0.498404	no	RHF2A	TAS3A-5'D6[+]:RHF2A	0.999877
AT5G24280.1	TAS3C-5'D9[+]	1689	5	0.33836	1.33836	no	GMI1	TAS3C-5'D9[+]:GMI1	0.999877
AT5G25560.4	TAS3A-5'D4[-]	2523	5	0.449202	0.422895	no	NA	TAS3A-5'D4[-]:AT5G25560.4	0.999877
AT5G28540.1	TAS1B-3'D4[-]	1747	5	0.525042	0.651235	no	BIP1	TAS1B-3'D4[-]:BIP1	0.999877
AT5G28770.3	TAS3A-5'D8[+]	935	6	0.320859	0.731752	no	AtbZIP63	TAS3A-5'D8[+]:AtbZIP63	0.999877
AT5G35170.2	TAS3C-5'D4[+]	985	5.5	0.600881	0.667003	no	NA	TAS3C-5'D4[+]:AT5G35170.2	0.999877
AT5G43850.1	TAS3B-5'D5[+]	136	5.5	0.245019	0.0534954	no	ARD4	TAS3B-5'D5[+]:ARD4	0.999877
AT5G46210.1	TAS3A-5'D9[+]	1071	4.5	0.478371	0.926851	no	ATCUL4	TAS3A-5'D9[+]:ATCUL4	0.999877
AT5G47120.1	TAS3C-5'D3[+]	773	6	0.554211	0.584994	no	ATBI-1	TAS3C-5'D3[+]:ATBI-1	0.999877
AT5G48180.1	TAS1B-3'D7[-]	657	5.5	1.94265	0.7031	no	AtNSP5	TAS1B-3'D7[-]:AtNSP5	0.999877
AT5G49600.1	TAS3B-5'D9[+]	196	6	0.408366	0.58537	no	NA	TAS3B-5'D9[+]:AT5G49600.1	0.999877
AT5G52660.2	TAS1A-3'D9[-]	407	6	0.717557	0.688828	no	NA	TAS1A-3'D9[-]:AT5G52660.2	0.999877
AT5G55820.1	TAS1A-3'D7[-]	5161	6	0.542543	1.54254	no	WYR	TAS1A-3'D7[-]:WYR	0.999877
AT5G56870.1	TAS1B-3'D7[-]	471	6	0.927573	0.631267	no	BGAL4	TAS1B-3'D7[-]:BGAL4	0.999877
AT5G62890.4	TAS2-3'D3[+]	1253	5.5	0.659219	0.676512	no	NA	TAS2-3'D3[+]:AT5G62890.4	0.999877
AT5G65620.1	TAS2-3'D5[+]	1820	5	0.542543	0.672103	no	NA	TAS2-3'D5[+]:AT5G65620.1	0.999877
AT5G66400.2	TAS3A-5'D1[+]	453	6	0.577546	0.5712	no	ATDI8	TAS3A-5'D1[+]:ATDI8	0.999877
AT5G66460.1	TAS3A-5'D5[+]	1252	5.5	1.42928	0.985797	no	AtMAN7	TAS3A-5'D5[+]:AtMAN7	0.999877
ATCG00380.1	TAS3B-5'D8[+]	235	6	3.66946	0.083399	no	RPS4	TAS3B-5'D8[+]:RPS4	0.999877
ATCG00830.1	TAS3B-5'D9[+]	771	4.5	1.23093	0.0611824	no	RPL2.1	TAS3B-5'D9[+]:RPL2.1	0.999877
ATMG00516.1	TAS3B-5'D9[-]	284	3	0.63005	0.541067	no	NAD1	TAS3B-5'D9[-]:NAD1	0.999877

[truncated: 20 more sheets: dcl234 (biorep #2), dcl234 (biorep #3), flowers (biorep #1), flowers (biorep #2), flowers (biorep #3), sepals (biorep #1), sepals (biorep #2), sepals (biorep #3), petals (biorep #1), petals (biorep #2), petals (biorep #3), anthers (biorep #1), anthers (biorep #2), anthers (biorep #3), stigma (biorep #1), stigma (biorep #2), stigma (biorep #3), ovules (biorep #1), ovules (biorep #2), ovules (biorep #3)]
