# Supplementary material for: NanoPARE: parallel analysis of RNA 5′ ends from low-input RNA
Source: Genome Res. 2018 Dec;28(12):1931–42. doi: 10.1101/gr.239202.118 (PMC6280765; doi:10.1101/gr.239202.118)
Supplement: Supplemental Material [file supp_gr.239202.118_Supplemental_Data_S6.xlsx]

## Sheet: validated.targets
Supplemental Data S6. Published small RNA target interactions validated by 5′ RACE
sRNA	targetAGI	targetName	5'-RACE validation	tissue of 5'RACE experiment	Publication link	Figure
miR156	AT2G33810	SPL3	yes	shoot apices	http://dev.biologists.org/content/133/18/3539#sec-2	1
miR156	AT1G53160	SPL4	yes	shoot apices	http://dev.biologists.org/content/133/18/3539#sec-3	1
miR156	AT3G15270	SPL5	yes	shoot apices	http://dev.biologists.org/content/133/18/3539#sec-4	1
miR156	AT3G57920	SPL15	yes	seedlings	http://bmcplantbiol.biomedcentral.com/articles/10.1186/1471-2229-12-169	6
miR156	AT5G43270	SPL2	yes	4-week-old floweringÂ Arabidopsis	http://www.sciencedirect.com/science/article/pii/S153458070300025X	6
miR156	AT1G69170	SPL6	yes	Inflorescence	http://www.nature.com/nbt/journal/v26/n8/full/nbt1417.html	S3b
miR159	AT2G26960	AtMYB81	yes	Inflorescence	https://silencejournal.biomedcentral.com/articles/10.1186/1758-907X-1-18#MOESM1	5
miR159	AT2G32460	MYB101	yes	Inflorescence	https://silencejournal.biomedcentral.com/articles/10.1186/1758-907X-1-18#MOESM1	5
miR159	AT2G34010	unknown	yes but weak	Inflorescence	http://www.nature.com/nbt/journal/v26/n8/full/nbt1417.html	S3b
miR159	AT5G55020	ATMYB120	yes	Inflorescence	https://silencejournal.biomedcentral.com/articles/10.1186/1758-907X-1-18#MOESM1	5
miR319	AT1G30210	TCP24	yes	Inflorescence, leaves	https://www.nature.com/nature/journal/v425/n6955/full/nature01958.html	4
miR319	AT1G53230	TCP3	yes	Inflorescence, leaves	https://www.nature.com/nature/journal/v425/n6955/full/nature01958.html	4
miR319	AT2G31070	TCP10	yes	Inflorescence, leaves	https://www.nature.com/nature/journal/v425/n6955/full/nature01958.html	4
miR159	AT3G11440	ATMYB65	yes	Inflorescence, leaves	http://www.sciencedirect.com/science/article/pii/S1534580707001591 , https://www.nature.com/nature/journal/v425/n6955/full/nature01958.html
miR319	AT3G15030	TCP4	yes	Inflorescence, leaves	https://www.nature.com/nature/journal/v425/n6955/full/nature01958.html	4
miR319	AT4G18390	TCP2	yes	Inflorescence, leaves	http://www.sciencedirect.com/science/article/pii/S1534580707001591	5
miR159	AT5G06100	MYB33	yes	Inflorescence, leaves	https://silencejournal.biomedcentral.com/articles/10.1186/1758-907X-1-18#MOESM1 , https://www.nature.com/nature/journal/v425/n6955/full/nature01958.html	5,4
miR160	AT1G77850	ARF17	yes	Inflorescence , 4-week-old floweringÂ Arabidopsis	http://www.plantcell.org/content/17/5/1360 , http://www.sciencedirect.com/science/article/pii/S153458070300025X	6,1
miR160	AT2G28350	ARF10	yes	Inflorescence , 4-week-old floweringÂ Arabidopsis	http://www.plantcell.org/content/17/5/1360, http://www.sciencedirect.com/science/article/pii/S153458070300025X	6,1
miR160	AT4G30080	ARF16	yes	unclear, most likely whole plant	http://www.plantcell.org/content/17/5/1360
miR161	AT1G06580	PPR protein	yes	Inflorescence	https://www.nature.com/ng/journal/v36/n12/full/ng1478.html	5
miR161	AT1G62910	PPR protein	yes	inflorescence tissue of 28-d-old, stage 1 to 12 flowers	http://www.plantcell.org/content/19/3/926.long#sec-11	Supp. 2
miR161	AT1G63080	PPR protein	yes	Inflorescence	http://www.pnas.org/content/104/9/3318.full.pdf	4
miR161	AT1G63130	TPR-like	yes	Inflorescence	https://www.nature.com/ng/journal/v36/n12/full/ng1478.html	Supp. 2
miR161	AT1G63150	TPR-like	yes	Inflorescence	https://www.nature.com/ng/journal/v36/n12/full/ng1478.html	5
miR161	AT1G63230	TPR-like	yes	Inflorescence	https://www.nature.com/ng/journal/v36/n12/full/ng1478.html	5
miR161	AT1G63400	PPR protein	yes	inflorescence tissue of 28-d-old, stage 1 to 12 flowers	http://www.plantcell.org/content/19/3/926.long#sec-11	Supp. 2
miR161	AT5G41170	PPR protein	yes	Inflorescence	https://www.nature.com/ng/journal/v36/n12/full/ng1478.html	5
miR162	AT1G01040	DCL1	yes	unclear	http://www.sciencedirect.com/science/article/pii/S0960982203002811	1
miR163	AT1G66690	methyltransferases	yes	Inflorescence	https://www.nature.com/ng/journal/v36/n12/full/ng1478.html	5
miR163	AT1G66700	PXMT1	yes	Inflorescence	https://www.nature.com/ng/journal/v36/n12/full/ng1478.html	5
miR163	AT1G66720	methyltransferases	yes	Inflorescence	https://www.nature.com/ng/journal/v36/n12/full/ng1478.html	5
miR163	AT3G44860	FAMT	yes	Inflorescence	https://www.nature.com/ng/journal/v36/n12/full/ng1478.html	5
miR164	AT1G56010	NAC1	yes	seedlings, roots	http://www.plantcell.org/content/17/5/1376.full	1
miR164	AT3G15170	CUC1	yes	Inflorescence, leaves	http://www.sciencedirect.com/science/article/pii/S153458070300025X	6
miR164	AT5G07680	ANAC080	yes	unclear	http://www.sciencedirect.com/science/article/pii/S0960982204004269	1
miR164	AT5G53950	CUC2	yes	Inflorescence, leaves	http://www.sciencedirect.com/science/article/pii/S153458070300025X	6
miR164	AT5G61430	ANAC100	yes	unclear	http://www.sciencedirect.com/science/article/pii/S0960982204004269	1
miR166	AT4G32880	ATHB-8	yes	leaves	http://emboj.embopress.org/content/23/16/3356	3
miR166	AT1G30490	PHV	yes	leaves	http://emboj.embopress.org/content/23/16/3356	3
miR166	AT1G52150	ATHB-15/CNA	yes	whole-plants, leaves	http://www.cell.com/fulltext/S0092-8674(13)00404-2 , http://emboj.embopress.org/content/23/16/3356	2,3
miR166	AT2G34710	PHB	yes	whole-plants, leaves	http://www.cell.com/fulltext/S0092-8674(13)00404-2 , http://emboj.embopress.org/content/23/16/3356	2,3
miR166	AT5G60690	REV	yes	whole-plants, leaves	http://www.cell.com/fulltext/S0092-8674(13)00404-2 , http://emboj.embopress.org/content/23/16/3356	2,3
miR167	AT5G37020	ARF8	yes	whole 4-week-old flowering plants	http://www.sciencedirect.com/science/article/pii/S153458070300025X	6
miR168	AT1G48410	AGO1	yes	leaves and flowers	http://www.sciencedirect.com/science/article/pii/S0960982204000478	Supp. 1
miR169	AT1G17590	NF-YA8	yes	leaves and flowers	http://www.sciencedirect.com/science/article/pii/S1097276504003284	5
miR169	AT1G54160	NFYA5	yes	leaves and flowers	http://www.sciencedirect.com/science/article/pii/S1097276504003284	5
miR169	AT1G72830	HAP2C	yes	leaves and flowers	http://www.sciencedirect.com/science/article/pii/S1097276504003284	5
miR169	AT3G05690	UNE8	yes	leaves and flowers	http://www.sciencedirect.com/science/article/pii/S1097276504003284	5
miR169	AT3G20910	NF-YA9	yes	leaves and flowers	http://www.sciencedirect.com/science/article/pii/S1097276504003284	5
miR169	AT5G06510	NF-YA10	yes	leaves and flowers	http://www.sciencedirect.com/science/article/pii/S1097276504003284	4
miR169	AT5G12840	HAP2A	only shows up in patent	unclear	https://www.google.com/patents/US20130185818	2A
miR171	AT2G45160	HAM1	yes	4-week-old floweringÂ Arabidopsis	http://www.sciencedirect.com/science/article/pii/S153458070300025X	3
miR171	AT3G60630	HAM2	yes	4-week-old floweringÂ Arabidopsis	http://www.sciencedirect.com/science/article/pii/S153458070300025X	3
miR171	AT4G00150	HAM3	yes	4-week-old floweringÂ Arabidopsis	http://www.sciencedirect.com/science/article/pii/S153458070300025X	3
miR172	AT2G39250	SNZ	yes	Inflorescence	http://www.nature.com/nbt/journal/v26/n8/full/nbt1417.html	S3b
miR172	AT3G54990	SMZ	yes	Inflorescence	http://www.nature.com/nbt/journal/v26/n8/full/nbt1417.html	S3b
miR172	AT4G36920	AP2	yes	Inflorescence	http://www.plantcell.org/content/15/11/2730	2
miR172	AT5G60120	TOE2	yes	Inflorescence	http://www.plantcell.org/content/15/11/2730	2
miR172	AT5G67180	TOE3	yes	Inflorescence	http://www.plantcell.org/content/15/11/2730	2
miR173	AT1G50055	TAS1B	yes	Inflorescence	http://www.sciencedirect.com/science/article/pii/S0092867405003454	1
miR173	AT2G27400	TAS1A	yes	Inflorescence	http://www.sciencedirect.com/science/article/pii/S0092867405003454	1
miR173	AT2G39675	TAS1C	yes	Inflorescence	http://www.sciencedirect.com/science/article/pii/S0092867405003454	1
miR173	AT2G39681	TAS2	yes	Inflorescence	http://www.sciencedirect.com/science/article/pii/S0092867405003454	1
miR390	AT3G17185	TAS3a	yes	Inflorescence	http://www.sciencedirect.com/science/article/pii/S0092867405003454	1
miR390	AT5G49615	TAS3b	yes	Inflorescence	http://www.plantcell.org/content/19/3/926.full	2
miR390	AT5G57735	TASIR-ARF	yes	Inflorescence	http://www.plantcell.org/content/19/3/926.full	2
miR393	AT1G12820	AFB3	yes	Inflorescence	http://www.pnas.org/content/107/9/4477.full
miR393	AT3G23690	bHLH	yes	leaves and flowers	http://www.sciencedirect.com/science/article/pii/S1097276504003284	4
miR393	AT3G26810	AFB2	yes	leaves and flowers	http://www.sciencedirect.com/science/article/pii/S1097276504003284	4
miR393	AT3G62980	TIR1	yes	leaves and flowers	http://www.sciencedirect.com/science/article/pii/S1097276504003284	4
miR393	AT4G03190	GRH1	yes	leaves and flowers	http://www.sciencedirect.com/science/article/pii/S1097276504003284	4
miR394	AT1G27340	Galactose oxidase	yes	leaves and flowers	http://www.sciencedirect.com/science/article/pii/S1097276504003284	4
miR395	AT3G22890	APS1	yes	leaves, roots	http://onlinelibrary.wiley.com/doi/10.1111/j.1365-313X.2008.03690.x/abstract;jsessionid=02130E6260DAF2AB4F752D66194BC31B.f04t02	5
miR395	AT4G14680	APS3	yes	leaves, roots	http://onlinelibrary.wiley.com/doi/10.1111/j.1365-313X.2008.03690.x/abstract;jsessionid=02130E6260DAF2AB4F752D66194BC31B.f04t02	5
miR395	AT5G10180	SULTR2	yes	leaves, roots	http://onlinelibrary.wiley.com/doi/10.1111/j.1365-313X.2008.03690.x/abstract;jsessionid=02130E6260DAF2AB4F752D66194BC31B.f04t03	5
miR395	AT5G43780	APS4	yes	leaves and flowers	http://www.sciencedirect.com/science/article/pii/S1097276504003284	5
miR396	AT2G22840	AtGRF1	yes	leaves and flowers	http://www.sciencedirect.com/science/article/pii/S1097276504003284	5
miR396	AT2G36400	AtGRF3	yes	leaves and flowers	http://www.sciencedirect.com/science/article/pii/S1097276504003284	5
miR396	AT2G40760	phosphatase	yes	leaves and flowers	http://www.sciencedirect.com/science/article/pii/S1097276504003284	5
miR396	AT2G45480	AtGRF9	yes	leaves and flowers	http://www.sciencedirect.com/science/article/pii/S1097276504003284	5
miR396	AT3G52910	AtGRF4	no
miR396	AT4G24150	AtGRF8	yes	leaves and flowers	http://www.sciencedirect.com/science/article/pii/S1097276504003284	5
miR396	AT4G37740	AtGRF2	yes	leaves and flowers	http://www.sciencedirect.com/science/article/pii/S1097276504003284	5
miR396	AT5G24660	LSU2	yes but weak	leaves	http://journals.plos.org/plosgenetics/article?id=10.1371/journal.pgen.1002419	1
miR396	AT1G10120	CIB4	yes	leaves	http://journals.plos.org/plosgenetics/article?id=10.1371/journal.pgen.1002419#s4	1
miR396	AT5G53660	AtGRF7	yes	leaves and flowers	http://www.sciencedirect.com/science/article/pii/S1097276504003284	5
miR397	AT2G29130	LAC2	yes	minus copper grown tissue	http://www.jbc.org/content/283/23/15932.full	5
miR397	AT2G38080	IRX12	yes	leaves and flowers	http://www.sciencedirect.com/science/article/pii/S1097276504003284	5
miR397	AT3G60250	CKB3	yes	Inflorescence	https://www.nature.com/nbt/journal/v26/n8/extref/nbt1417-S1.pdf	S3b
miR397	AT5G60020	LAC17	yes	leaves and flowers	http://www.sciencedirect.com/science/article/pii/S1097276504003284	5
miR398	AT1G08830	CSD1	yes	leaves and flowers	http://www.sciencedirect.com/science/article/pii/S1097276504003284	5
miR398	AT2G28190	CSD2	yes	leaves and flowers	http://www.sciencedirect.com/science/article/pii/S1097276504003284	5
miR398	AT3G15640	Rubredoxin-like	yes	leaves and flowers	http://www.sciencedirect.com/science/article/pii/S1097276504003284	5
miR399	AT2G33770	UBC24	yes	Inflorescence	http://www.sciencedirect.com/science/article/pii/S0092867405003454	1
miR403	AT1G31280	AGO2	yes	Inflorescence	http://www.sciencedirect.com/science/article/pii/S0092867405003454	1
miR408	AT2G02850	ARPN	yes	Inflorescence	http://www.nature.com/nbt/journal/v26/n8/full/nbt1417.html	S3b
miR408	AT2G30210	LAC3	yes	minus copper grown tissue	http://www.jbc.org/content/283/23/15932	5
miR447	AT5G60760	AT5G60760	yes	Inflorescence	http://www.sciencedirect.com/science/article/pii/S0092867405003454	1
miR472	AT1G51480	AT1G51480	yes	inflorescence	http://journals.plos.org/plosone/article?id=10.1371/journal.pone.0000219	S1
miR472	AT5G43740	AT5G43740	yes	Inflorescence	http://journals.plos.org/plosone/article?id=10.1371/journal.pone.0000219	S1
miR773	AT4G14140	DMT2	yes	inflorescence	http://journals.plos.org/plosone/article?id=10.1371/journal.pone.0000219	1
miR774	AT3G19890	F-box protein	yes	inflorescence	http://journals.plos.org/plosone/article?id=10.1371/journal.pone.0000219	S2
miR775	AT1G53290	Galactosyltransferase	yes	inflorescence	http://journals.plos.org/plosone/article?id=10.1371/journal.pone.0000219	1
miR778	AT2G22740	SUVH6	yes	inflorescence	http://journals.plos.org/plosone/article?id=10.1371/journal.pone.0000219	1
miR823	AT1G69770	CMT3	yes	inflorescence	http://www.nature.com/nbt/journal/v26/n8/full/nbt1417.html	S3b
miR824	AT3G57230	AGL16	yes	inflorescence	http://www.plantcell.org/content/19/8/2417	1
miR827	AT1G02860	NLA	yes	inflorescence	http://journals.plos.org/plosone/article?id=10.1371/journal.pone.0000219	1
miR828	AT1G66370	MYB113	yes	siliques or seedlings	http://genesdev.cshlp.org/content/20/24/3407/F5.expansion.html	4
miR828	AT3G25795	TAS4	yes	siliques or seedlings	http://genesdev.cshlp.org/content/20/24/3407/F5.expansion.html	4
miR842	AT5G38550	Mannose-binding	yes according to two references but cannot find it		http://journals.plos.org/plosone/article?id=10.1371/journal.pone.0000219 , http://nar.oxfordjournals.org/content/37/12/4010.full	table 2, supp. Table 8
miR844	AT5G51270	U-box domain-containing	yes	inflorescence	http://journals.plos.org/plosone/article?id=10.1371/journal.pone.0000219	1
miR846	AT5G49850	Mannose-binding lectin	yes	inflorescence	http://journals.plos.org/plosone/article?id=10.1371/journal.pone.0000219	1
miR857	AT5G41610	ATCHX18	tested but failed	inflorescence	http://journals.plos.org/plosone/article?id=10.1371/journal.pone.0000219	table 2
miR858	AT3G09220	LAC7	yes	inflorescence	http://journals.plos.org/plosone/article?id=10.1371/journal.pone.0000219	1
miR858	AT1G06180	AtMYB13	yes	Inflorescence	http://www.nature.com/nbt/journal/v26/n8/full/nbt1417.html	s3b
miR858	AT2G47460	MYB12	yes	inflorescence	http://journals.plos.org/plosone/article?id=10.1371/journal.pone.0000219	1
miR858	AT3G08500	MYB83	yes	inflorescence	http://journals.plos.org/plosone/article?id=10.1371/journal.pone.0000219	Table 2
miR858	AT5G49330	AtMYB111	yes	inflorescence	http://www.nature.com/nbt/journal/v26/n8/full/nbt1417.html	S3b
miR858	AT1G66230	AtMYB20	yes	inflorescence	http://www.nature.com/nbt/journal/v26/n8/full/nbt1417.html	S3b
miR859	AT3G49510	F-box	yes	inflorescence	http://journals.plos.org/plosone/article?id=10.1371/journal.pone.0000219	1
TAS1A-3'D2[+]	AT5G18040	HEAT-INDUCED TAS1 TARGET 2, HTT2	yes	2-week-old rosettes	http://genesdev.cshlp.org/content/18/19/2368.long	Figure 7B
TAS1A-3'D6[+]	AT4G29770	HEAT-INDUCED TAS1 TARGET 1, HTT1	yes	Inflorescences (stages 1â€“12)	http://www.cell.com/cell/fulltext/S0092-8674(05)00345-4	Figure 3F
TAS1A-3'D6[+]	AT5G18040	HEAT-INDUCED TAS1 TARGET 2, HTT2	yes	Inflorescences (stages 1â€“12)	http://www.cell.com/cell/fulltext/S0092-8674(05)00345-4	Figure 3F
TAS1A-3'D9[+]	AT1G12700	RNA PROCESSING FACTOR 1, RPF1	yes	Inflorescences (stages 1â€“12)	http://www.plantcell.org/content/19/3/926	Supp. 2
TAS1A-3'D9[+]	AT1G12775	PPR	yes	Inflorescences (stages 1â€“12)	http://www.plantcell.org/content/19/3/926	Supp. 2
TAS1B-3'D5[+]	AT5G18040	HEAT-INDUCED TAS1 TARGET 2, HTT2	yes	2-week-old rosettes	http://genesdev.cshlp.org/content/18/19/2368.long	Figure 7B
TAS1C-3'D4[+]	AT5G18040	HEAT-INDUCED TAS1 TARGET 2, HTT2	yes	2-week-old rosettes	http://genesdev.cshlp.org/content/18/19/2368.long	Figure 7B
TAS2-3'D6[-]	AT1G63130Â Â	PPR	yes	Inflorescences (stages 1â€“12)	http://www.plantcell.org/content/19/3/926	Supp. 2
TAS2-3â€²D6[-]	AT1G63080	Transacting siRNA generating locus	yes	Seedlings	http://www.pnas.org/content/104/9/3318	Figure 4B
TAS2-3'D6[-]	AT1G62910	Â RF-LIKE 9, RFL9, RNA PROCESSING FACTOR 4, RPF4	yes	Inflorescences (stages 1â€“12)	http://www.plantcell.org/content/19/3/926	Supp. 2
TAS2-3'D6[-]	AT1G63150	PPR	yes	Inflorescences (stages 1â€“12)	http://www.plantcell.org/content/19/3/926	Supp. 2
TAS2-3'D6[-]	AT1G63400	PPR	yes	Inflorescences (stages 1â€“12)	http://www.plantcell.org/content/19/3/926	Supp. 2
TAS2-3'D11[-]	AT1G62930	RNA PROCESSING FACTOR 3, RPF3	yes	Inflorescences (stages 1â€“12)	http://www.plantcell.org/content/19/3/926	Supp. 2
TAS3-5'D8[+]	AT5G62000	ARF2	yes	Inflorescences (stages 1â€“12)	http://www.pnas.org/content/102/27/9703.long	Figure 3B
TAS3-5'D8[+]	AT2G33860	ARF3	yes	Inflorescences (stages 1â€“12)	http://www.cell.com/cell/fulltext/S0092-8674(05)00345-4	Figure 4D
TAS3-5'D7[+]	AT5G60450	ARF4	yes	Inflorescences (stages 1â€“12)	http://www.cell.com/cell/fulltext/S0092-8674(05)00345-4	Figure 4D
TAS8-5'D9[+]	AT1G62930	RNA PROCESSING FACTOR 3, RPF3	yes	Inflorescences (stages 1â€“12)	http://www.pnas.org/content/104/9/3318	Figure 4D
TAS4-3'D4[-]	AT1G56650	PAP1/MYB75	yes	whole siliques or seedlings	http://genesdev.cshlp.org/content/20/24/3407.long	Figure 5B
TAS4-3'D4[-]	AT1G66390	PAP2/MYB90	yes	whole siliques or seedlings	http://genesdev.cshlp.org/content/20/24/3407.long	Figure 5B
TAS4-3'D4[-]	AT1G66370	MYB113	yes	whole siliques or seedlings	http://genesdev.cshlp.org/content/20/24/3407.long	Figure 5B
