# Supplementary material for: NanoPARE: parallel analysis of RNA 5′ ends from low-input RNA
Source: Genome Res. 2018 Dec;28(12):1931–42. doi: 10.1101/gr.239202.118 (PMC6280765; doi:10.1101/gr.239202.118)
Supplement: Supplemental Material [file supp_gr.239202.118_Supplemental_Data_S7.xlsx]

## Sheet: GSM278334
Supplemental Data S7. miRNA cleavage sites identified from publicly available unmasked degradome/PARE libraries
RPM: Reads per million transcriptome-mapping reads
Target transcript	miRNA	miRNA slice site position in target transcript	Allen score of sRNA:target duplex	Slice site RPM	Slice site RPM + 1/Maximum adjacent site RPM + 1	Previously verified by 5' RACE?	Target gene common name	Interaction name	P-value adjusted for multiple testing
AT1G12820.1	miR393a-5p	1894	4	7.52877	8.52877	yes	AFB3	miR393a-5p:AFB3	0
AT1G27340.1	miR394a	1382	1	0.865108	0.888604	yes	LCR	miR394a:LCR	0
AT1G27360.4	miR156j	1309	0	10.6852	4.10422	no	SPL11	miR156j:SPL11	0
AT1G27370.4	miR156j	1324	0	0.607913	1.60791	no	SPL10	miR156j:SPL10	0
AT1G31280.1	miR403-3p	3232	1	49.5683	11.3669	yes	AGO2	miR403-3p:AGO2	0
AT1G50055.1	miR173-5p	373	4.5	3.88129	4.88129	yes	TAS1b	miR173-5p:TAS1b	0
AT1G63980.2	miR414	889	2.5	0.128597	0.469685	no	NA	miR414:AT1G63980.2	0
AT1G77850.1	miR160a-5p	1419	0.5	19.4298	20.4298	yes	ARF17	miR160a-5p:ARF17	0
AT2G27400.1	miR173-5p	378	2.5	4.00989	5.00989	yes	TAS1a	miR173-5p:TAS1a	0
AT2G28600.1	miR162a-5p	1576	5.5	2.32644	3.32644	no	NA	miR162a-5p:AT2G28600.1	0
AT2G33810.1	miR156a-5p	796	1.5	5.27248	1.8467	yes	SPL3	miR156a-5p:SPL3	0
AT2G35670.1	miR414	211	2.5	0.128597	1.03207	no	FIE2	miR414:FIE2	0
AT2G39675.1	miR173-5p	378	2.5	19.0207	8.41383	yes	TAS1c	miR173-5p:TAS1c	0
AT2G39681.1	miR173-5p	417	2.5	12.6493	13.6493	yes	TAS2	miR173-5p:TAS2	0
AT2G45160.1	miR171a-3p	1013	0	3.54226	4.54226	yes	ATHAM1	miR171a-3p:ATHAM1	0
AT3G17185.2	miR390a-5p	863	4.5	454.789	198.371	yes	TAS3a	miR390a-5p:TAS3a	0
AT3G25795.1	miR828	887	1	0.678057	1.67806	yes	TAS4	miR828:TAS4	0
AT3G26810.1	miR393a-5p	2009	4	5.68165	6.68165	yes	AFB2	miR393a-5p:AFB2	0
AT3G57230.2	miR824-5p	596	0.5	0.572841	1.57284	yes	AGL16	miR824-5p:AGL16	0
AT4G00150.1	miR171a-3p	866	0	3.51888	4.51888	yes	ATHAM3	miR171a-3p:ATHAM3	0
AT4G18390.2	miR319a	1136	2.5	0.771582	1.77158	yes	TCP2	miR319a:TCP2	0
AT4G30080.1	miR160a-5p	1518	2.5	0.923561	1.92356	yes	ARF16	miR160a-5p:ARF16	0
AT5G37780.3	miR414	638	2.5	9.98381	0.653122	no	ACAM-1	miR414:ACAM-1	0
AT5G43270.3	miR156j	1111	0	0.818345	0.939591	yes	SPL2	miR156j:SPL2	0
AT5G60120.2	miR172a	1820	1	0.385791	0.94424	yes	TOE2	miR172a:TOE2	0
AT5G61440.1	miR396b-5p	718	5	5.82194	6.82194	no	ACHT5	miR396b-5p:ACHT5	0
AT3G15270.1	miR156i	654	2	0.888489	1.88849	yes	SPL5	miR156i:SPL5	0.0215112
AT5G64816.2	miR5021	491	2.5	4.46583	3.10578	no	NA	miR5021:AT5G64816.2	0.0346863
AT3G15170.1	miR164a	674	2.5	0.748201	1.7482	yes	ANAC054	miR164a:ANAC054	0.0389575
AT5G15720.1	miR832-3p	989	4	1.95234	2.95234	no	GLIP7	miR832-3p:GLIP7	0.0612248
AT1G35490.1	miR4243	895	5	3.23831	4.23831	no	NA	miR4243:AT1G35490.1	0.0651337
AT1G63080.1	miR161.2	1027	4	1.70683	2.70683	yes	NA	miR161.2:AT1G63080.1	0.0655147
AT1G20560.2	miR5654-5p	1050	5	1.82374	2.82374	no	AAE1	miR5654-5p:AAE1	0.0710962
AT3G58810.2	miR5019	1854	2.5	1.61331	1.1432	no	ATMTP3	miR5019:ATMTP3	0.0710962
AT4G24150.1	miR396a-5p	847	4	1.20414	2.20414	yes	AtGRF8	miR396a-5p:AtGRF8	0.080094
AT5G52060.1	miR5022	1452	4	3.29676	2.83729	no	ATBAG1	miR5022:ATBAG1	0.0887615
AT1G62910.1	miR161.2	996	3	0.233813	1.23381	yes	RFL9	miR161.2:RFL9	0.0897704
AT1G62914.1	miR161.2	978	3	0.245503	1.2455	no	NA	miR161.2:AT1G62914.1	0.0897704
AT1G62930.1	miR161.2	984	3	0.233813	1.23381	no	RPF3	miR161.2:RPF3	0.0897704
AT1G63130.1	miR161.2	1111	3	0.245503	1.2455	yes	TAS8	miR161.2:TAS8	0.0897704
AT5G57735.1	miR390a-5p	428	4.5	5.26079	2.81065	yes	TAS3c	miR390a-5p:TAS3c	0.0897704
AT4G13495.2	miR863-3p	755	3	3.70593	0.879791	no	NA	miR863-3p:AT4G13495.2	0.101252
AT5G06100.3	miR159a	1259	3.5	0.73651	1.73651	yes	ATMYB33	miR159a:ATMYB33	0.106278
AT3G11440.1	miR159a	1165	3.5	0.514388	1.51439	yes	ATMYB65	miR159a:ATMYB65	0.124577
AT4G23680.1	miR5658	557	2	0.888489	0.147452	no	NA	miR5658:AT4G23680.1	0.124577
AT4G01670.1	miR407	1076	4.5	1.34442	2.34442	no	NA	miR407:AT4G01670.1	0.12659
AT1G57765.2	miR5020c	694	5	5.81025	2.53787	no	NA	miR5020c:AT1G57765.2	0.145605
AT5G55910.1	miR5021	1942	4	2.04586	3.04586	no	D6PK	miR5021:D6PK	0.150834
AT2G27170.2	miR414	3359	4.5	2.44334	1.96965	no	SMC3	miR414:SMC3	0.179151
AT5G64520.3	miR5658	656	5.5	1.88219	2.88219	no	ATXRCC2	miR5658:ATXRCC2	0.191689
AT1G53870.2	miR172d-5p	589	4.5	2.79406	1.68557	no	NA	miR172d-5p:AT1G53870.2	0.202067
AT1G53890.3	miR172d-5p	537	4.5	2.79406	1.68557	no	NA	miR172d-5p:AT1G53890.3	0.202067
AT5G53350.1	miR5658	1923	3	2.70054	0.612807	no	CLPX	miR5658:CLPX	0.202067
AT1G63640.2	miR414	3005	4.5	0.806654	1.80665	no	NA	miR414:AT1G63640.2	0.221642
AT1G26690.1	miR5021	24	6	1.54316	2.54316	no	NA	miR5021:AT1G26690.1	0.248883
AT1G53230.1	miR319c	1194	3.5	0.607913	1.60791	yes	TCP3	miR319c:TCP3	0.248883
AT1G31335.1	miR5021	109	4.5	1.56655	2.56655	no	NA	miR5021:AT1G31335.1	0.285801
AT3G24982.1	miR773b-5p	2789	3.5	0.467626	0.777143	no	ATRLP40	miR773b-5p:ATRLP40	0.292158
AT1G20980.1	miR831-5p	3804	4.5	5.41277	1.31374	no	ATSPL14	miR831-5p:ATSPL14	0.316116
AT3G16170.1	miR858b	1565	4.5	2.17446	1.26569	no	AAE13	miR858b:AAE13	0.34967
AT3G03000.1	miR837-5p	555	6	1.77698	2.77698	no	NA	miR837-5p:AT3G03000.1	0.375461
AT1G34320.1	miR5021	2636	5	4.94514	1.89372	no	NA	miR5021:AT1G34320.1	0.383269
AT1G01300.1	miR8170-3p	1681	4	2.44334	0.713965	no	NA	miR8170-3p:AT1G01300.1	0.392908
AT4G36670.1	miR5021	1489	5	0.701439	1.70144	no	AtPLT6	miR5021:AtPLT6	0.42021
AT5G45250.1	miR395a	2649	4.5	0.339029	1.33903	no	RPS4	miR395a:RPS4	0.42021
AT5G63640.1	miR5021	67	5.5	0.923561	1.92356	no	NA	miR5021:AT5G63640.1	0.42021
AT3G27200.1	miR398a-3p	268	5.5	1.46133	2.46133	no	NA	miR398a-3p:AT3G27200.1	0.421512
AT2G38610.2	miR5021	1209	4.5	2.73561	1.41053	no	NA	miR5021:AT2G38610.2	0.43198
AT4G12100.1	miR414	1294	4.5	1.09892	1.06527	no	NA	miR414:AT4G12100.1	0.458946
AT4G32260.1	miR5021	895	3	21.6745	0.614452	no	PDE334	miR5021:PDE334	0.480371
AT4G24770.1	miR156a-3p	492	6	1.09892	2.09892	no	ATRBP31	miR156a-3p:ATRBP31	0.528989
AT3G59990.4	miR396a-5p	1060	5.5	1.29766	2.29766	no	MAP2B	miR396a-5p:MAP2B	0.556265
AT5G27560.1	miR5640	1190	5.5	0.993705	1.99371	no	NA	miR5640:AT5G27560.1	0.556265
AT5G63550.2	miR414	1598	4.5	0.233813	1.23381	no	NA	miR414:AT5G63550.2	0.556265
AT1G14670.1	miR5658	1537	4	1.22752	0.605772	no	NA	miR5658:AT1G14670.1	0.561889
AT2G30660.1	miR5021	1218	6	0.619604	1.6196	no	NA	miR5021:AT2G30660.1	0.561889
AT5G01820.1	miR1888a	1706	4	1.20414	0.56023	no	ATCIPK14	miR1888a:ATCIPK14	0.561889
AT1G28960.5	miR5025	1084	6	0.876798	1.8768	no	ATNUDT15	miR5025:ATNUDT15	0.622757
AT4G00238.1	miR3434-5p	1321	4.5	1.06385	1.06005	no	NA	miR3434-5p:AT4G00238.1	0.643219
AT4G30935.1	miR3434-5p	1487	4.5	0.771582	0.993444	no	ATWRKY32	miR3434-5p:ATWRKY32	0.664771
AT1G20140.1	miR5021	656	4.5	2.16277	0.981855	no	ASK4	miR5021:ASK4	0.673348
AT4G10570.1	miR8181	2925	4.5	1.05216	0.544241	no	UBP9	miR8181:UBP9	0.678323
AT5G54855.1	miR5020b	520	4	1.18075	0.491486	no	NA	miR5020b:AT5G54855.1	0.692414
AT3G11830.2	miR5021	1811	3	4.73471	0.270189	no	NA	miR5021:AT3G11830.2	0.693359
AT3G15480.1	miR849	733	4	1.20414	0.287609	no	NA	miR849:AT3G15480.1	0.693359
AT5G49100.1	miR5021	1308	4	1.29766	0.790778	no	NA	miR5021:AT5G49100.1	0.693359
AT4G03415.2	miR172d-5p	1648	4.5	0.888489	0.706833	no	PP2C52	miR172d-5p:PP2C52	0.698461
AT3G49880.1	miR157d	1913	5.5	0.444244	1.44424	no	NA	miR157d:AT3G49880.1	0.722939
AT2G21600.1	miR159a	913	5	6.5	0.866314	no	ATRER1B	miR159a:ATRER1B	0.735472
AT3G47370.3	miR867	603	5	2.9928	0.87453	no	NA	miR867:AT3G47370.3	0.738513
AT1G48210.2	miR774b-5p	1179	5	0.982014	1.26015	no	NA	miR774b-5p:AT1G48210.2	0.770234
AT2G28620.1	miR413	3076	6	0.888489	1.88849	no	NA	miR413:AT2G28620.1	0.789271
AT3G07560.1	miR5021	1233	6	2.65378	1.60657	no	APM2	miR5021:APM2	0.789271
AT1G05200.2	miR5998a	3253	5.5	1.06385	1.213	no	ATGLR3.4	miR5998a:ATGLR3.4	0.791222
AT2G20990.3	miR5014a-5p	2069	4	1.39119	0.193777	no	ATSYTA	miR5014a-5p:ATSYTA	0.791222
AT1G07920.1	miR414	1280	4.5	0.36241	0.426041	no	NA	miR414:AT1G07920.1	0.809998
AT4G25290.1	miR863-5p	2132	6	0.853417	1.85342	no	NA	miR863-5p:AT4G25290.1	0.817728
AT5G10480.3	miR159b-3p	776	6	1.01709	2.01709	no	PAS2	miR159b-3p:PAS2	0.817728
AT1G48380.2	miR396a-5p	1173	6	0.888489	1.88849	no	HYP7	miR396a-5p:HYP7	0.843086
AT1G07270.1	miR5025	1372	5	0.53777	0.697673	no	NA	miR5025:AT1G07270.1	0.860893
AT1G01620.2	miR157c-3p	320	5.5	0.689748	0.929278	no	PIP1;3	miR157c-3p:PIP1;3	0.874475
AT3G12950.1	miR829-3p.2	1965	6	2.02248	1.01174	no	NA	miR829-3p.2:AT3G12950.1	0.879519
AT3G53260.1	miR415	2333	6	1.29766	1.02077	no	ATPAL2	miR415:ATPAL2	0.891921
AT1G07940.2	miR414	1411	4.5	0.783273	0.28064	no	NA	miR414:AT1G07940.2	0.898336
AT1G57750.2	miR414	1303	5	0.853417	0.745929	no	CYP96A15	miR414:CYP96A15	0.898336
AT1G10200.1	miR394a	660	5	2.49011	0.571324	no	WLIM1	miR394a:WLIM1	0.898716
AT2G10940.2	miR862-5p	726	6	2.60701	1.06931	no	NA	miR862-5p:AT2G10940.2	0.906226
AT4G35830.2	miR5021	3068	4	1.98741	0.503486	no	ACO1	miR5021:ACO1	0.906226
AT3G56800.1	miR837-5p	536	5	0.526079	0.793361	no	ACAM-3	miR837-5p:ACAM-3	0.907614
AT2G25870.1	miR5021	1872	6	1.08723	0.894759	no	NA	miR5021:AT2G25870.1	0.927283
AT2G40475.1	miR5021	665	6	1.02878	0.882977	no	ASG8	miR5021:ASG8	0.928055
AT1G02560.1	miR5998a	928	6	1.35611	1.12882	no	CLPP5	miR5998a:CLPP5	0.947828
AT3G15790.1	miR415	880	6	1.08723	0.736125	no	ATMBD11	miR415:ATMBD11	0.947828
AT3G16310.1	miR5017-3p	1316	5	1.01709	0.483928	no	NA	miR5017-3p:AT3G16310.1	0.949661
AT4G04320.2	miR842	1448	5.5	0.713129	0.627469	no	NA	miR842:AT4G04320.2	0.949661
AT4G26230.1	miR414	332	5	1.94065	0.51488	no	NA	miR414:AT4G26230.1	0.949661
AT5G45670.1	miR167a-3p	1107	5	1.90557	0.539669	no	NA	miR167a-3p:AT5G45670.1	0.949661
AT5G60548.1	miR838	638	6	0.0701439	1.07014	no	CPuORF62	miR838:CPuORF62	0.949661
AT5G60550.1	miR838	638	6	0.0701439	1.07014	no	ATSNAK1	miR838:ATSNAK1	0.949661
AT1G10740.4	miR5658	1758	5.5	0.666367	0.53679	no	NA	miR5658:AT1G10740.4	0.955456
AT1G12810.2	miR5640	395	6	1.3795	0.615779	no	NA	miR5640:AT1G12810.2	0.955456
AT1G14320.2	miR447c-3p	453	6	1.47302	0.811928	no	RPL10	miR447c-3p:RPL10	0.955456
AT1G28400.1	miR2112-5p	1287	5.5	1.14568	0.604662	no	NA	miR2112-5p:AT1G28400.1	0.955456
AT1G45145.1	miR837-5p	390	5	0.72482	0.326746	no	ATH5	miR837-5p:ATH5	0.955456
AT1G66580.1	miR158a-5p	795	5	3.13309	0.275655	no	RPL10C	miR158a-5p:RPL10C	0.955456
AT1G67350.2	miR854a	355	5	1.22752	0.351847	no	NA	miR854a:AT1G67350.2	0.955456
AT1G75660.1	miR5658	3168	5	0.689748	0.46395	no	AtXRN3	miR5658:AtXRN3	0.955456
AT1G78040.2	miR415	511	4.5	4.04496	0.172786	no	NA	miR415:AT1G78040.2	0.955456
AT2G18160.1	miR5633	829	5.5	1.39119	0.513222	no	ATBZIP2	miR5633:ATBZIP2	0.955456
AT2G18162.1	miR5633	829	5.5	1.39119	0.513222	no	CPuORF1	miR5633:CPuORF1	0.955456
AT2G25670.2	miR5021	1695	6	1.23921	0.687657	no	NA	miR5021:AT2G25670.2	0.955456
AT2G28680.1	miR156h	1238	5	1.43795	0.399853	no	NA	miR156h:AT2G28680.1	0.955456
AT2G31585.2	miR849	526	5.5	0.444244	0.507265	no	NA	miR849:AT2G31585.2	0.955456
AT3G11120.1	miR831-3p	105	5	1.02878	0.120051	no	NA	miR831-3p:AT3G11120.1	0.955456
AT3G11290.1	miR4239	1170	5.5	1.51978	0.747	no	NA	miR4239:AT3G11290.1	0.955456
AT3G26740.1	miR5658	208	5	0.654676	0.414415	no	CCL	miR5658:CCL	0.955456
AT3G50410.1	miR850	844	5.5	1.13399	0.623981	no	OBP1	miR850:OBP1	0.955456
AT4G32340.1	miR160c-3p	804	5	3.32014	0.40363	no	NA	miR160c-3p:AT4G32340.1	0.955456
AT5G01350.1	miR156j	459	4.5	0.876798	0.226897	no	NA	miR156j:AT5G01350.1	0.955456
AT5G05540.2	miR397b	1717	5	0.841726	0.271834	no	SDN2	miR397b:SDN2	0.955456
AT5G07090.2	miR5640	976	4.5	5.06205	0.174619	no	NA	miR5640:AT5G07090.2	0.955456
AT5G11740.1	miR5020b	190	5	3.23831	0.367485	no	AGP15	miR5020b:AGP15	0.955456
AT5G27380.1	miR5021	1729	6	1.34442	0.704783	no	GSH2	miR5021:GSH2	0.955456
AT5G27850.1	miR396b-5p	541	5	5.33093	0.383651	no	NA	miR396b-5p:AT5G27850.1	0.955456
AT5G38480.2	miR167d	721	6	1.96403	1.11427	no	GRF3	miR167d:GRF3	0.955456
AT5G48412.1	miR849	639	5.5	2.03417	0.582527	no	NA	miR849:AT5G48412.1	0.955456
AT5G53540.1	miR157d	1200	5	0.794964	0.489695	no	NA	miR157d:AT5G53540.1	0.955456
AT5G61660.1	miR164c-3p	350	5.5	0.923561	0.701541	no	NA	miR164c-3p:AT5G61660.1	0.955456
AT5G37780.3	miR414	560	5	1.84712	0.210757	no	ACAM-1	miR414:ACAM-1	0.956932
AT3G53460.4	miR403-5p	1385	5	1.05216	0.136548	no	CP29	miR403-5p:CP29	0.959066
AT1G27470.1	miR3434-5p	2603	5.5	0.818345	0.63605	no	NA	miR3434-5p:AT1G27470.1	0.961127
AT2G42310.1	miR5017-3p	413	6	0.759892	0.701686	no	NA	miR5017-3p:AT2G42310.1	0.961127
AT4G35300.5	miR837-5p	2294	5.5	1.97572	0.973237	no	TMT2	miR837-5p:TMT2	0.961127
AT4G38430.1	miR397a	1701	5.5	0.607913	0.650182	no	ATROPGEF1	miR397a:ATROPGEF1	0.961127
AT5G10400.1	miR414	488	5	0.91187	0.212515	no	NA	miR414:AT5G10400.1	0.961127
AT5G11670.1	miR156j	2112	5	0.923561	0.39219	no	ATNADP-ME2	miR156j:ATNADP-ME2	0.961127
AT5G14380.1	miR5021	573	6	2.44334	0.94543	no	AGP6	miR5021:AGP6	0.961127
AT5G47480.1	miR156i	4178	5.5	1.13399	0.667322	no	NA	miR156i:AT5G47480.1	0.961127
AT5G49030.3	miR5023	3918	6	1.21583	0.908891	no	OVA2	miR5023:OVA2	0.961127
AT3G20520.1	miR5017-5p	2205	5	1.01709	0.202383	no	GDPDL5	miR5017-5p:GDPDL5	0.968693
AT2G16600.2	miR773b-5p	405	5	3.9982	0.261405	no	ROC3	miR773b-5p:ROC3	0.976089
AT2G23350.1	miR854a	2192	5.5	2.82914	0.597112	no	PAB4	miR854a:PAB4	0.977026
AT4G14270.2	miR5021	517	5	1.22752	0.459641	no	NA	miR5021:AT4G14270.2	0.977026
AT4G37180.2	miR847	1082	6	1.19245	0.675723	no	NA	miR847:AT4G37180.2	0.979847
AT3G52470.1	miR5632-3p	906	6	1.32104	0.60801	no	NA	miR5632-3p:AT3G52470.1	0.98556
AT3G15840.5	miR4239	802	6	0.759892	0.8932	no	PIFI	miR4239:PIFI	0.986719
AT3G53470.2	miR169g-3p	412	6	1.47302	0.72065	no	NA	miR169g-3p:AT3G53470.2	0.991217
AT1G12080.2	miR838	461	5.5	2.02248	0.278736	no	NA	miR838:AT1G12080.2	0.991696
AT1G53310.3	miR5640	3152	6	1.08723	0.43595	no	ATPEPC1	miR5640:ATPEPC1	0.991696
AT1G55670.1	miR157d	654	5.5	16.0279	0.256229	no	PSAG	miR157d:PSAG	0.991696
AT1G60950.1	miR773b-3p	423	5.5	4.44244	0.41732	no	ATFD2	miR773b-3p:ATFD2	0.991696
AT1G67590.2	miR5021	1176	6	0.923561	0.345279	no	NA	miR5021:AT1G67590.2	0.991696
AT1G70890.1	miR4239	437	6	0.642985	0.563193	no	MLP43	miR4239:MLP43	0.991696
AT2G13360.2	miR5021	1381	5.5	2.41996	0.316758	no	AGT	miR5021:AGT	0.991696
AT2G16600.2	miR414	538	5.5	5.64658	0.336704	no	ROC3	miR414:ROC3	0.991696
AT2G32060.3	miR5666	435	5.5	1.43795	0.20739	no	NA	miR5666:AT2G32060.3	0.991696
AT2G37920.1	miR5021	741	6	0.654676	0.335766	no	emb1513	miR5021:emb1513	0.991696
AT3G01090.3	miR5021	1795	5	1.06385	0.284952	no	AKIN10	miR5021:AKIN10	0.991696
AT3G08520.1	miR831-3p	29	6	7.83273	0.408722	no	NA	miR831-3p:AT3G08520.1	0.991696
AT3G13235.3	miR8182	1540	6	0.888489	0.528701	no	DDI1	miR8182:DDI1	0.991696
AT3G22440.1	miR2936	1793	6	3.23831	0.417412	no	NA	miR2936:AT3G22440.1	0.991696
AT3G46780.1	miR828	1591	6	1.98741	0.440934	no	PTAC16	miR828:PTAC16	0.991696
AT3G48930.1	miR5020c	437	6	0.654676	0.452867	no	EMB1080	miR5020c:EMB1080	0.991696
AT3G49910.1	miR172b-5p	606	5.5	1.1223	0.060502	no	NA	miR172b-5p:AT3G49910.1	0.991696
AT4G14270.2	miR831-3p	273	6	1.27428	0.532197	no	NA	miR831-3p:AT4G14270.2	0.991696
AT4G22190.1	miR845a	1059	6	1.71852	0.611076	no	NA	miR845a:AT4G22190.1	0.991696
AT4G24770.1	miR854a	1111	5.5	0.526079	0.135057	no	ATRBP31	miR854a:ATRBP31	0.991696
AT4G24960.3	miR414	695	5.5	1.08723	0.0373939	no	ATHVA22D	miR414:ATHVA22D	0.991696
AT4G30660.2	miR5021	64	6	0.759892	0.374905	no	NA	miR5021:AT4G30660.2	0.991696
AT5G01075.1	miR5021	360	6	1.33273	0.411811	no	NA	miR5021:AT5G01075.1	0.991696
AT5G43460.1	miR829-3p.2	770	5.5	0.91187	0.271867	no	NA	miR829-3p.2:AT5G43460.1	0.991696
AT5G59613.2	miR5021	495	6	1.1223	0.457808	no	NA	miR5021:AT5G59613.2	0.991696
AT5G62210.1	miR2112-5p	659	6	1.58993	0.371997	no	NA	miR2112-5p:AT5G62210.1	0.991696
AT4G26630.2	miR414	2451	6	0.818345	0.353868	no	NA	miR414:AT4G26630.2	0.997401
AT3G08690.2	miR156i	900	6	2.6187	0.389582	no	ATUBC11	miR156i:ATUBC11	0.99891
AT3G56020.1	miR831-3p	71	6	0.479316	0.495183	no	NA	miR831-3p:AT3G56020.1	0.99891
AT1G08930.2	miR5017-3p	1688	6	0.876798	0.145344	no	ERD6	miR5017-3p:ERD6	0.999816
AT1G11910.1	miR172d-5p	1558	6	0.865108	0.256683	no	APA1	miR172d-5p:APA1	0.999816
AT2G22230.1	miR3434-3p	667	6	0.759892	0.309407	no	NA	miR3434-3p:AT2G22230.1	0.999816
AT2G47110.2	miR838	303	6	0.970323	0.186532	no	UBI6	miR838:UBI6	0.999816
AT4G29030.1	miR841b-5p	609	6	1.48471	0.14202	no	NA	miR841b-5p:AT4G29030.1	0.999816
AT5G05690.3	miR5021	1481	6	0.841726	0.255936	no	CBB3	miR5021:CBB3	0.999816
AT5G58420.1	miR1887	960	6	0.853417	0.102777	no	NA	miR1887:AT5G58420.1	0.999816

## Sheet: GSM278335
Target transcript	miRNA	miRNA slice site position in target transcript	Allen score of sRNA:target duplex	Slice site RPM	Slice site RPM + 1/Maximum adjacent site RPM + 1	Previously verified by 5' RACE?	Target gene common name	Interaction name	P-value adjusted for multiple testing
AT1G12820.1	miR393a-5p	1894	4	5.85098	6.85098	yes	AFB3	miR393a-5p:AFB3	0
AT1G17590.4	miR169h	1515	2.5	0.337472	1.33747	yes	NF-YA8	miR169h:NF-YA8	0
AT1G27360.4	miR156j	1309	0	9.92256	7.28348	no	SPL11	miR156j:SPL11	0
AT1G30210.2	miR319a	1022	2.5	1.54711	2.09681	yes	ATTCP24	miR319a:ATTCP24	0
AT1G30490.1	miR165a-3p	805	3	18.3506	4.93775	yes	ATHB9	miR165a-3p:ATHB9	0
AT1G31280.1	miR403-3p	3232	1	31.5076	23.5341	yes	AGO2	miR403-3p:AGO2	0
AT1G33120.1	miR5630a	309	0	0.530313	0.126182	no	NA	miR5630a:AT1G33120.1	0
AT1G33140.1	miR5630a	309	0	0.530313	0.126182	no	PGY2	miR5630a:PGY2	0
AT1G48410.3	miR168a-5p	531	5	4.43973	5.43973	yes	AGO1	miR168a-5p:AGO1	0
AT1G50055.1	miR173-5p	373	4.5	23.7984	14.2823	yes	TAS1b	miR173-5p:TAS1b	0
AT1G62590.1	miR161.2	1049	1	0.42951	1.42951	no	NA	miR161.2:AT1G62590.1	0
AT1G63330.1	miR161.2	774	1	0.42951	1.42951	no	NA	miR161.2:AT1G63330.1	0
AT1G77850.1	miR160a-5p	1419	0.5	205.753	54.8431	yes	ARF17	miR160a-5p:ARF17	0
AT2G20280.1	miR414	1015	2	0.398831	1.39273	no	NA	miR414:AT2G20280.1	0
AT2G22840.1	miR396a-5p	791	4	35.6493	12.7634	yes	AtGRF1	miR396a-5p:AtGRF1	0
AT2G23350.1	miR156f-3p	1923	4	22.0058	17.7237	no	PAB4	miR156f-3p:PAB4	0
AT2G27400.1	miR173-5p	378	2.5	11.2549	12.2549	yes	TAS1a	miR173-5p:TAS1a	0
AT2G28350.1	miR160a-5p	1339	2	11.7852	12.7852	yes	ARF10	miR160a-5p:ARF10	0
AT2G33770.1	miR399a	750	1.5	0.617968	1.61797	yes	ATUBC24	miR399a:ATUBC24	0
AT2G33810.1	miR156a-5p	796	1.5	4.49671	1.57922	yes	SPL3	miR156a-5p:SPL3	0
AT2G34710.1	miR165a-3p	880	3	8.89699	8.42075	yes	ATHB-14	miR165a-3p:ATHB-14	0
AT2G39675.1	miR173-5p	378	2.5	68.0291	40.9982	yes	TAS1c	miR173-5p:TAS1c	0
AT2G39681.1	miR173-5p	417	2.5	23.4346	24.4346	yes	TAS2	miR173-5p:TAS2	0
AT2G42200.1	miR156j	946	0	1.70489	1.38326	no	AtSPL9	miR156j:AtSPL9	0
AT2G45160.1	miR171a-3p	1013	0	32.9934	5.80479	yes	ATHAM1	miR171a-3p:ATHAM1	0
AT3G15270.1	miR156i	654	2	17.9518	18.9518	yes	SPL5	miR156i:SPL5	0
AT3G17185.2	miR390a-5p	863	4.5	473.653	299.862	yes	TAS3a	miR390a-5p:TAS3a	0
AT3G19890.1	miR2939	321	1.5	0.727537	1.72754	no	NA	miR2939:AT3G19890.1	0
AT3G25795.1	miR828	887	1	2.78305	2.81009	yes	TAS4	miR828:TAS4	0
AT3G57230.2	miR824-5p	596	0.5	0.924761	1.92476	yes	AGL16	miR824-5p:AGL16	0
AT3G57920.1	miR156j	854	0	0.543462	1.54346	yes	SPL15	miR156j:SPL15	0
AT3G60630.1	miR171a-3p	1055	0	33.1029	4.77909	yes	ATHAM2	miR171a-3p:ATHAM2	0
AT4G00150.1	miR171a-3p	866	0	47.2505	9.76711	yes	ATHAM3	miR171a-3p:ATHAM3	0
AT4G18390.2	miR319a	1136	2.5	1.73119	2.73119	yes	TCP2	miR319a:TCP2	0
AT4G30080.1	miR160a-5p	1518	2.5	49.6961	50.6961	yes	ARF16	miR160a-5p:ARF16	0
AT4G31510.1	miR414	502	2.5	1.5515	1.94596	no	NA	miR414:AT4G31510.1	0
AT4G32880.1	miR165a-3p	944	3	0.547844	1.54784	no	ATHB-8	miR165a-3p:ATHB-8	0
AT4G36920.2	miR172c	1303	1	7.23155	8.23155	yes	AP2	miR172c:AP2	0
AT5G37780.3	miR414	638	2.5	12.8327	0.566315	no	ACAM-1	miR414:ACAM-1	0
AT5G43270.3	miR156j	1111	0	2.27027	3.27027	yes	SPL2	miR156j:SPL2	0
AT5G50570.2	miR156j	976	0	0.271731	1.07007	no	SPL13	miR156j:SPL13	0
AT5G50670.1	miR156j	1111	0	0.271731	1.07007	no	SPL13	miR156j:SPL13	0
AT5G57735.1	miR390a-5p	428	4.5	11.5573	12.5573	yes	TAS3c	miR390a-5p:TAS3c	0
AT1G02860.2	miR827	268	1	5.32943	6.32943	yes	BAH1	miR827:BAH1	0.00161756
AT3G15030.3	miR319c	1310	3	12.0307	4.80967	yes	MEE35	miR319c:MEE35	0.00207797
AT5G60120.2	miR172a	1820	1	3.65083	4.65083	yes	TOE2	miR172a:TOE2	0.00207797
AT1G52150.3	miR166a-3p	1278	3	12.1052	6.87133	yes	ATHB-15	miR166a-3p:ATHB-15	0.00537108
AT5G49330.1	miR858a	385	3	8.61211	6.58278	yes	ATMYB111	miR858a:ATMYB111	0.00577266
AT1G69770.1	miR823	2036	2.5	6.0745	2.39077	yes	CMT3	miR823:CMT3	0.0118305
AT2G45480.1	miR396a-5p	524	4	4.36961	5.36961	yes	AtGRF9	miR396a-5p:AtGRF9	0.0141463
AT4G24150.1	miR396a-5p	847	4	3.71219	4.71219	yes	AtGRF8	miR396a-5p:AtGRF8	0.0141463
AT2G47460.1	miR858b	400	2.5	1.73995	1.69805	yes	ATMYB12	miR858b:ATMYB12	0.0277467
AT1G27370.4	miR157a-5p	1325	2	5.05332	2.37654	no	SPL10	miR157a-5p:SPL10	0.029041
AT3G15170.1	miR164a	674	2.5	0.355003	1.355	yes	ANAC054	miR164a:ANAC054	0.030573
AT4G10380.1	miR5021	34	1.5	0.587289	1.48938	no	AtNIP5;1	miR5021:AtNIP5;1	0.0328337
AT1G63150.1	miR161.2	996	2.5	0.504017	1.50402	yes	NA	miR161.2:AT1G63150.1	0.0348175
AT4G36780.1	miR5657	899	2.5	1.21402	0.986332	no	BEH2	miR5657:BEH2	0.0364731
AT1G63400.1	miR161.2	999	2	0.227903	1.2279	yes	NA	miR161.2:AT1G63400.1	0.0405998
AT2G31070.1	miR319c	1390	2.5	0.460189	1.46019	yes	TCP10	miR319c:TCP10	0.0488796
AT1G53230.1	miR319c	1194	3.5	1.66983	2.66983	yes	TCP3	miR319c:TCP3	0.0491935
AT5G06100.3	miR159a	1259	3.5	1.18334	2.18334	yes	ATMYB33	miR159a:ATMYB33	0.0491935
AT4G23680.1	miR5658	557	2	4.10664	0.308312	no	NA	miR5658:AT4G23680.1	0.0613924
AT3G11440.1	miR159a	1165	3.5	0.78013	1.78013	yes	ATMYB65	miR159a:ATMYB65	0.0628389
AT3G25150.2	miR5021	100	2.5	1.37618	1.93515	no	NA	miR5021:AT3G25150.2	0.0718334
AT3G03380.1	miR3434-5p	2584	3	1.59971	0.718847	no	DEG7	miR3434-5p:DEG7	0.0881717
AT1G51760.1	miR167a-5p	862	3	0.376917	1.37692	no	IAR3	miR167a-5p:IAR3	0.0895927
AT3G11290.1	miR4239	1170	5.5	6.03505	7.03505	no	NA	miR4239:AT3G11290.1	0.0915914
AT1G15340.2	miR773a	736	6	12.3199	13.3199	no	MBD10	miR773a:MBD10	0.0965273
AT5G01430.2	miR5021	59	3	1.99415	2.99415	no	NA	miR5021:AT5G01430.2	0.0968589
AT5G67180.1	miR172a	1308	3	0.311176	1.31118	yes	TOE3	miR172a:TOE3	0.106082
AT5G41170.1	miR161.2	891	3	0.433893	1.43389	yes	NA	miR161.2:AT5G41170.1	0.120805
AT1G48490.3	miR4239	4035	5	2.29656	3.29656	no	NA	miR4239:AT1G48490.3	0.146262
AT1G69170.1	miR157a-5p	1307	2.5	0.376917	0.718643	no	SPL6	miR157a-5p:SPL6	0.146262
AT5G09420.1	miR8180	1250	4	0.845872	1.84587	no	AtmtOM64	miR8180:AtmtOM64	0.146262
AT5G53660.1	miR396a-5p	539	4	0.543462	1.54346	yes	AtGRF7	miR396a-5p:AtGRF7	0.146262
AT4G37740.1	miR396a-5p	920	4	0.420744	1.42074	yes	AtGRF2	miR396a-5p:AtGRF2	0.15912
AT3G12480.1	miR5637	1198	6	15.5895	9.82737	no	NF-YC11	miR5637:NF-YC11	0.179954
AT4G20440.4	miR5633	960	6	4.28633	5.28633	no	smB	miR5633:smB	0.181779
AT1G18090.2	miR1888a	1814	4	1.94156	2.94156	no	NA	miR1888a:AT1G18090.2	0.183781
AT3G49601.1	miR414	738	4.5	1.626	2.61454	no	NA	miR414:AT3G49601.1	0.187822
AT2G39800.4	miR397a	858	5.5	4.63695	5.63695	no	ATP5CS	miR397a:ATP5CS	0.18979
AT3G26200.1	miR870-3p	1143	4	0.60482	1.60482	no	CYP71B22	miR870-3p:CYP71B22	0.207968
AT4G02930.1	miR8172	214	6	5.439	4.96061	no	NA	miR8172:AT4G02930.1	0.207968
AT5G28320.1	miR841a-3p	1765	4	0.135865	1.13586	no	NA	miR841a-3p:AT5G28320.1	0.241453
AT5G28400.1	miR841a-3p	1951	4	0.135865	1.13586	no	NA	miR841a-3p:AT5G28400.1	0.241453
AT2G24450.1	miR5644	577	5	1.63915	2.63915	no	FLA3	miR5644:FLA3	0.244672
AT1G09795.1	miR5021	118	3	0.359386	1.35939	no	ATATP-PRT2	miR5021:ATATP-PRT2	0.246406
AT5G66420.2	miR396b-5p	1636	5	1.87582	2.87582	no	NA	miR396b-5p:AT5G66420.2	0.251821
AT3G26810.1	miR393a-5p	2009	4	0.205989	1.20599	yes	AFB2	miR393a-5p:AFB2	0.268571
AT2G20990.3	miR5014a-5p	2069	4	12.1709	1.10681	no	ATSYTA	miR5014a-5p:ATSYTA	0.291343
AT2G27050.1	miR172e-3p	160	6	3.34842	4.34842	no	AtEIL1	miR172e-3p:AtEIL1	0.293167
AT5G38610.1	miR156h	588	3	1.42001	0.375326	no	NA	miR156h:AT5G38610.1	0.312868
AT3G61780.1	miR841a-3p	2281	4	0.135865	1.13586	no	emb1703	miR841a-3p:emb1703	0.325637
AT3G52230.1	miR414	512	4	1.38057	1.38858	no	NA	miR414:AT3G52230.1	0.330552
AT5G06510.3	miR399a	1237	5	1.10445	2.10445	no	NF-YA10	miR399a:NF-YA10	0.331326
AT5G54430.1	miR414	735	3.5	1.7531	0.285509	no	ATPHOS32	miR414:ATPHOS32	0.342282
AT2G39810.1	miR5023	2270	5	1.02118	2.02118	no	ESD6	miR5023:ESD6	0.347854
AT2G37920.1	miR5021	741	6	4.26004	3.57015	no	emb1513	miR5021:emb1513	0.353379
AT3G26570.2	miR5021	212	3	1.51643	1.15256	no	ORF02	miR5021:ORF02	0.356
AT2G18960.1	miR419	2243	5.5	1.66545	2.66545	no	AHA1	miR419:AHA1	0.362948
AT3G48610.1	miR166a-3p	1620	5	0.626734	1.62673	no	NPC6	miR166a-3p:NPC6	0.388707
AT2G26780.1	miR5021	203	6	1.60847	2.60847	no	NA	miR5021:AT2G26780.1	0.417725
AT2G47850.3	miR5021	138	4	0.674944	1.65321	no	NA	miR5021:AT2G47850.3	0.417725
AT3G07760.2	miR172d-5p	266	4.5	2.05989	1.05756	no	NA	miR172d-5p:AT3G07760.2	0.417725
AT3G26630.1	miR164b-3p	859	5	1.10884	2.10884	no	NA	miR164b-3p:AT3G26630.1	0.420097
AT5G03060.1	miR5658	931	4	0.0657413	0.910169	no	NA	miR5658:AT5G03060.1	0.429125
AT3G20720.2	miR830-3p	1387	5.5	1.88458	2.52978	no	NA	miR830-3p:AT3G20720.2	0.448895
AT3G57660.1	miR414	4024	4.5	0.955441	1.20858	no	NRPA1	miR414:NRPA1	0.453883
AT5G02050.1	miR414	500	4.5	0.933527	1.52565	no	NA	miR414:AT5G02050.1	0.482012
AT4G19700.1	miR837-3p	1000	5	1.24909	2.24909	no	AtILP	miR837-3p:AtILP	0.495923
AT2G04842.1	miR850	1664	6	2.27903	2.51766	no	EMB2761	miR850:EMB2761	0.504461
AT3G15840.5	miR867	393	5.5	1.5515	2.5515	no	PIFI	miR867:PIFI	0.504461
AT5G18940.2	miR857	753	5.5	2.41928	2.62535	no	NA	miR857:AT5G18940.2	0.504461
AT2G18840.1	miR5021	253	3	0.425127	0.332085	no	NA	miR5021:AT2G18840.1	0.505153
AT2G32260.1	miR5595a	846	6	1.34551	2.34551	no	ATCCT1	miR5595a:ATCCT1	0.505153
AT3G52930.1	miR863-5p	351	4.5	0.60482	0.717738	no	AtFBA8	miR863-5p:AtFBA8	0.505153
AT5G64030.1	miR162a-5p	2071	5	1.34989	1.32007	no	NA	miR162a-5p:AT5G64030.1	0.505153
AT1G75880.2	miR5634	408	5.5	1.05624	2.05624	no	NA	miR5634:AT1G75880.2	0.509691
AT2G10970.1	miR867	380	5	0.442658	1.44266	no	NA	miR867:AT2G10970.1	0.509691
AT3G01090.3	miR5021	1795	5	3.15997	1.76699	no	AKIN10	miR5021:AKIN10	0.509691
AT4G10030.1	miR5641	1259	5.5	0.885316	1.88532	no	NA	miR5641:AT4G10030.1	0.509691
AT2G36880.2	miR5021	1600	5.5	1.32797	2.32797	no	MAT3	miR5021:MAT3	0.519036
AT5G61440.1	miR396b-5p	718	5	0.889699	1.8897	no	ACHT5	miR396b-5p:ACHT5	0.521401
AT2G16900.3	miR5654-5p	1508	4.5	1.68298	0.947383	no	NA	miR5654-5p:AT2G16900.3	0.522879
AT5G54160.1	miR5634	591	5.5	2.24835	2.50253	no	ATOMT1	miR5634:ATOMT1	0.535403
AT4G32260.1	miR5021	895	3	8.77427	0.202023	no	PDE334	miR5021:PDE334	0.53912
AT3G29075.1	miR842	423	5	1.0168	2.0168	no	NA	miR842:AT3G29075.1	0.543978
AT3G27200.1	miR398a-3p	268	5.5	2.19138	2.13434	no	NA	miR398a-3p:AT3G27200.1	0.552963
AT3G60380.1	miR843	898	6	1.08692	2.08692	no	NA	miR843:AT3G60380.1	0.55362
AT1G10120.1	miR396a-5p	1316	5.5	0.867785	1.86779	yes	NA	miR396a-5p:AT1G10120.1	0.569447
AT5G65380.1	miR5649a	250	5	0.674944	1.67494	no	NA	miR5649a:AT5G65380.1	0.578356
AT4G18596.1	miR5021	123	6	1.28415	2.28415	no	NA	miR5021:AT4G18596.1	0.583621
AT1G30530.1	miR773b-3p	1144	4.5	2.18699	0.664583	no	UGT78D1	miR773b-3p:UGT78D1	0.594127
AT2G32000.2	miR417	2002	5.5	0.924761	1.92476	no	NA	miR417:AT2G32000.2	0.594127
AT3G04730.1	miR391-3p	784	4.5	1.22279	0.623694	no	IAA16	miR391-3p:IAA16	0.594127
AT3G11830.2	miR5021	1811	3	0.3813	0.0613026	no	NA	miR5021:AT3G11830.2	0.594127
AT1G14670.1	miR156h	1102	4	0.705624	0.669631	no	NA	miR156h:AT1G14670.1	0.600596
AT4G24290.2	miR5021	73	4	0.885316	1.02137	no	NA	miR5021:AT4G24290.2	0.611045
AT5G55280.1	miR5641	170	6	0.920378	1.92038	no	ATFTSZ1-1	miR5641:ATFTSZ1-1	0.611045
AT2G37990.1	miR838	954	5	3.68151	1.28669	no	NA	miR838:AT2G37990.1	0.612639
AT5G51910.2	miR849	774	5.5	0.705624	1.70562	no	NA	miR849:AT5G51910.2	0.612639
AT5G53530.1	miR773b-3p	671	5	1.47699	1.0886	no	VPS26A	miR773b-3p:VPS26A	0.625052
AT5G23940.1	miR3440b-3p	713	4.5	1.59532	0.699823	no	DCR	miR3440b-3p:DCR	0.627423
AT2G42380.2	miR5021	23	5	0.42951	1.42951	no	ATBZIP34	miR5021:ATBZIP34	0.635209
AT3G24080.2	miR780.2	1336	5	0.0219138	1.02191	no	NA	miR780.2:AT3G24080.2	0.639707
AT1G08470.1	miR5661	637	6	0.736303	1.7363	no	SSL3	miR5661:SSL3	0.668612
AT3G27160.1	miR5021	31	4	2.19576	0.721829	no	GHS1	miR5021:GHS1	0.668612
AT5G42470.1	miR164b-3p	1117	6	1.09569	2.09569	no	NA	miR164b-3p:AT5G42470.1	0.668612
AT2G23820.2	miR5021	279	5	0.666179	1.52575	no	NA	miR5021:AT2G23820.2	0.682102
AT4G13615.1	miR774b-5p	14	5.5	4.7027	1.7253	no	NA	miR774b-5p:AT4G13615.1	0.682102
AT4G37200.1	miR5021	375	4	1.00365	0.927002	no	HCF164	miR5021:HCF164	0.682102
AT3G58730.1	miR861-3p	884	4.5	1.65668	0.230293	no	NA	miR861-3p:AT3G58730.1	0.69231
AT1G80410.2	miR823	1178	6	0.749451	1.74945	no	EMB2753	miR823:EMB2753	0.699347
AT1G24793.2	miR861-3p	671	5	0.0657413	1.06574	no	AtLpxC1	miR861-3p:AtLpxC1	0.709294
AT1G25054.2	miR861-3p	934	5	0.0657413	1.06574	no	AtLpxC3	miR861-3p:AtLpxC3	0.709294
AT1G25145.1	miR861-3p	654	5	0.0657413	1.06574	no	AtLpxC4	miR861-3p:AtLpxC4	0.709294
AT1G25210.2	miR861-3p	789	5	0.0657413	1.06574	no	AtLpxC5	miR861-3p:AtLpxC5	0.709294
AT4G16760.2	miR5021	2235	3.5	0.346238	0.164951	no	ACX1	miR5021:ACX1	0.709294
AT5G62570.2	miR156h	1611	4	0.298027	0.149869	no	NA	miR156h:AT5G62570.2	0.714199
AT3G20520.1	miR5017-5p	2205	5	1.57779	1.23781	no	GDPDL5	miR5017-5p:GDPDL5	0.720276
AT5G62210.1	miR2112-5p	659	6	6.29364	1.90809	no	NA	miR2112-5p:AT5G62210.1	0.721327
AT1G61890.1	miR5021	557	4	0.85902	0.599812	no	NA	miR5021:AT1G61890.1	0.727943
AT2G18400.1	miR831-5p	463	4.5	0.539079	0.19325	no	NA	miR831-5p:AT2G18400.1	0.727943
AT5G11740.1	miR5020b	190	5	7.31482	1.14001	no	AGP15	miR5020b:AGP15	0.727943
AT5G27850.1	miR396b-5p	541	5	14.6428	0.811142	no	NA	miR396b-5p:AT5G27850.1	0.727943
AT5G39850.1	miR414	599	5.5	1.09569	1.50288	no	NA	miR414:AT5G39850.1	0.745703
AT5G07530.2	miR164b-3p	1497	5	10.2031	0.720424	no	ATGRP-7	miR164b-3p:ATGRP-7	0.75116
AT1G60590.1	miR5021	29	6	0.447041	1.36904	no	NA	miR5021:AT1G60590.1	0.753359
AT4G31590.1	miR5012	317	6	0.591672	1.59167	no	ATCSLC05	miR5012:ATCSLC05	0.753359
AT5G54430.1	miR8167a	126	5	0.495251	0.63869	no	ATPHOS32	miR8167a:ATPHOS32	0.753359
AT2G01450.4	miR5021	1686	4	1.81884	0.391419	no	ATMPK17	miR5021:ATMPK17	0.762963
AT5G11670.1	miR156j	2112	5	2.44558	0.735998	no	ATNADP-ME2	miR156j:ATNADP-ME2	0.762963
AT1G63020.2	miR415	4723	5	0.648648	0.565523	no	NRPD1	miR415:NRPD1	0.778385
AT4G32340.1	miR160c-3p	804	5	5.27245	0.697733	no	NA	miR160c-3p:AT4G32340.1	0.786665
AT3G02820.1	miR3434-5p	591	5.5	0.433893	1.43389	no	NA	miR3434-5p:AT3G02820.1	0.787828
AT3G01130.2	miR5021	290	5	1.31483	1.17067	no	NA	miR5021:AT3G01130.2	0.788775
AT2G38550.1	miR5658	1219	5.5	2.25274	0.846096	no	NA	miR5658:AT2G38550.1	0.813172
AT5G07590.1	miR5019	1589	5.5	1.19211	0.825131	no	NA	miR5019:AT5G07590.1	0.813172
AT2G21600.1	miR159a	913	5	0.626734	0.279669	no	ATRER1B	miR159a:ATRER1B	0.829498
AT4G11800.1	miR5021	604	6	0.407596	1.4076	no	NA	miR5021:AT4G11800.1	0.844397
AT3G48740.1	miR5021	65	6	0.98612	1.14968	no	AtSWEET11	miR5021:AtSWEET11	0.847313
AT3G11120.1	miR831-3p	105	5	2.11687	0.192043	no	NA	miR831-3p:AT3G11120.1	0.848048
AT4G00800.1	miR5012	5776	6	0.298027	1.29803	no	SETH5	miR5012:SETH5	0.848048
AT2G31960.2	miR860	5964	5	0.2542	0.415236	no	ATGSL03	miR860:ATGSL03	0.862357
AT3G47370.3	miR867	603	5	0.219138	0.364969	no	NA	miR867:AT3G47370.3	0.864718
AT5G45670.1	miR167a-3p	1107	5	0.547844	0.351352	no	NA	miR167a-3p:AT5G45670.1	0.864718
AT2G16600.2	miR773b-5p	405	5	13.5865	0.410014	no	ROC3	miR773b-5p:ROC3	0.864846
AT1G62500.1	miR161.2	778	5	1.56026	0.218203	no	NA	miR161.2:AT1G62500.1	0.876037
AT4G14220.1	miR5021	101	6	0.460189	1.01215	no	RHF1A	miR5021:RHF1A	0.876037
AT1G76490.1	miR781a	1146	5.5	0.574141	0.723883	no	AtHMGR1	miR781a:AtHMGR1	0.881189
AT3G12610.1	miR3932a	1000	6	1.74872	0.881885	no	DRT100	miR3932a:DRT100	0.881189
AT5G37780.3	miR414	560	5	2.30095	0.160996	no	ACAM-1	miR414:ACAM-1	0.881189
AT5G53500.1	miR447c-3p	2130	6	0.149014	1.14901	no	NA	miR447c-3p:AT5G53500.1	0.881189
AT5G60360.3	miR396b-5p	627	5.5	4.07158	0.594282	no	AALP	miR396b-5p:AALP	0.881189
AT1G10290.1	miR172a	2877	6	0.157779	1.15778	no	ADL6	miR172a:ADL6	0.899701
AT4G09670.1	miR415	1278	5	0.692475	0.336041	no	NA	miR415:AT4G09670.1	0.943966
AT4G24960.3	miR414	695	5.5	11.1629	0.373953	no	ATHVA22D	miR414:ATHVA22D	0.955608
AT5G12140.1	miR846-5p	430	6	3.06793	0.723906	no	ATCYS1	miR846-5p:ATCYS1	0.955608
AT1G20693.3	miR414	583	5.5	3.36157	0.344687	no	HMG BETA 1	miR414:HMG BETA 1	0.960571
AT1G49910.1	miR3434-5p	1036	5.5	0.525931	0.428162	no	BUB3.2	miR3434-5p:BUB3.2	0.965546
AT1G60950.1	miR773b-3p	423	5.5	3.92695	0.356746	no	ATFD2	miR773b-3p:ATFD2	0.965546
AT1G12810.2	miR5640	395	6	1.30168	0.649825	no	NA	miR5640:AT1G12810.2	0.973801
AT1G16890.3	miR5998a	491	5.5	0.293645	0.387274	no	UBC13B	miR5998a:UBC13B	0.973801
AT1G17745.2	miR839-5p	1917	6	1.55588	0.374746	no	PGDH	miR839-5p:PGDH	0.973801
AT1G49910.1	miR169f-3p	1050	6	2.56391	0.478005	no	BUB3.2	miR169f-3p:BUB3.2	0.973801
AT1G55670.1	miR157d	654	5.5	27.6114	0.37477	no	PSAG	miR157d:PSAG	0.973801
AT1G65230.1	miR5640	883	5.5	2.65157	0.192856	no	NA	miR5640:AT1G65230.1	0.973801
AT1G68300.1	miR2939	621	6	9.65959	0.538309	no	NA	miR2939:AT1G68300.1	0.973801
AT2G04030.2	miR831-5p	1986	6	0.696858	0.506652	no	AtHsp90.5	miR831-5p:AtHsp90.5	0.973801
AT2G22980.4	miR846-5p	1289	5.5	1.26223	0.230414	no	SCPL13	miR846-5p:SCPL13	0.973801
AT2G23350.1	miR854a	2192	5.5	1.51643	0.521417	no	PAB4	miR854a:PAB4	0.973801
AT2G26910.1	miR2937	1863	5.5	0.560993	0.414549	no	ABCG32	miR2937:ABCG32	0.973801
AT2G31585.2	miR849	526	5.5	0.990503	0.0953297	no	NA	miR849:AT2G31585.2	0.973801
AT2G35020.1	miR857	998	6	2.53761	0.614671	no	GlcNAc1pUT2	miR857:GlcNAc1pUT2	0.973801
AT3G04290.1	miR5661	669	5.5	0.863403	0.179914	no	ATLTL1	miR5661:ATLTL1	0.973801
AT3G09840.1	miR861-3p	590	6	0.394448	0.689918	no	ATCDC48	miR861-3p:ATCDC48	0.973801
AT3G56020.1	miR831-3p	71	6	20.0467	0.67549	no	NA	miR831-3p:AT3G56020.1	0.973801
AT3G61130.1	miR774b-5p	2340	6	0.784513	0.541326	no	GAUT1	miR774b-5p:GAUT1	0.973801
AT4G15410.1	miR869.1	1273	5.5	0.359386	0.221838	no	PUX5	miR869.1:PUX5	0.973801
AT4G21660.2	miR847	1356	6	0.0876551	0.470757	no	NA	miR847:AT4G21660.2	0.973801
AT4G22190.1	miR845a	1059	6	6.10956	0.67361	no	NA	miR845a:AT4G22190.1	0.973801
AT4G35300.5	miR3932a	2239	5.5	0.872168	0.148881	no	TMT2	miR3932a:TMT2	0.973801
AT4G39330.2	miR841b-5p	348	6	0.736303	0.420485	no	ATCAD9	miR841b-5p:ATCAD9	0.973801
AT5G01350.1	miR172b-5p	447	5.5	2.12125	0.265817	no	NA	miR172b-5p:AT5G01350.1	0.973801
AT5G08690.1	miR3434-3p	385	6	1.1439	0.510524	no	NA	miR3434-3p:AT5G08690.1	0.973801
AT5G15210.1	miR847	819	6	0.880934	0.540399	no	ATHB30	miR847:ATHB30	0.973801
AT5G20170.1	miR156f-3p	1817	6	0.530313	0.485516	no	NA	miR156f-3p:AT5G20170.1	0.973801
AT5G43760.1	miR854a	313	5.5	0.236669	0.357098	no	KCS20	miR854a:KCS20	0.973801
AT5G65670.2	miR390a-3p	939	5.5	3.07669	0.228645	no	IAA9	miR390a-3p:IAA9	0.973801
AT1G17730.1	miR779.1	595	6	0.534696	0.500119	no	CHMP1B	miR779.1:CHMP1B	0.980674
AT1G30230.2	miR5665	662	6	1.58217	0.369576	no	eEF-1Bb1	miR5665:eEF-1Bb1	0.982631
AT2G35620.2	miR5652	2133	6	1.33674	0.401733	no	FEI2	miR5652:FEI2	0.982631
AT3G19820.3	miR5658	126	6	0.666179	0.374119	no	CBB1	miR5658:CBB1	0.982631
AT3G22968.1	miR779.2	1207	6	0.473338	0.44398	no	CPuORF59	miR779.2:CPuORF59	0.982631
AT3G22970.2	miR779.2	1205	6	0.473338	0.44398	no	NA	miR779.2:AT3G22970.2	0.982631
AT3G48930.1	miR5020c	437	6	1.09131	0.433723	no	EMB1080	miR5020c:EMB1080	0.982631
AT3G62250.1	miR838	281	6	1.18773	0.415915	no	UBQ5	miR838:UBQ5	0.982631
AT4G29030.1	miR841b-5p	609	6	4.69393	0.342321	no	NA	miR841b-5p:AT4G29030.1	0.982631
AT1G53310.3	miR5640	3152	6	1.21402	0.297653	no	ATPEPC1	miR5640:ATPEPC1	0.990861
AT1G14320.2	miR447c-3p	453	6	0.425127	0.333106	no	RPL10	miR447c-3p:RPL10	0.997361
AT1G13280.1	miR172b-5p	973	6	0.951058	0.204659	no	AOC4	miR172b-5p:AOC4	0.99771
AT1G30530.1	miR773a	584	6	0.416362	0.305981	no	UGT78D1	miR773a:UGT78D1	0.99771
AT2G10940.2	miR862-5p	726	6	1.76625	0.257707	no	NA	miR862-5p:AT2G10940.2	0.99771
AT2G19730.3	miR8168	455	6	1.51205	0.725374	no	NA	miR8168:AT2G19730.3	0.99771
AT3G19130.1	miR830-5p	1638	6	1.86267	0.22957	no	ATRBP47B	miR830-5p:ATRBP47B	0.99771
AT3G22440.1	miR2936	1793	6	0.73192	0.401525	no	NA	miR2936:AT3G22440.1	0.99771
AT4G04640.1	miR5021	1310	6	0.455806	0.195603	no	ATPC1	miR5021:ATPC1	0.99771
AT5G64310.1	miR417	426	6	0.534696	0.30392	no	AGP1	miR417:AGP1	0.99771
AT1G78830.1	miR5024-3p	1279	6	0.219138	0.130035	no	NA	miR5024-3p:AT1G78830.1	0.997931
AT5G28640.1	miR779.1	944	6	2.32724	0.201736	no	AN3	miR779.1:AN3	0.997931

## Sheet: GSM280226
Target transcript	miRNA	miRNA slice site position in target transcript	Allen score of sRNA:target duplex	Slice site RPM	Slice site RPM + 1/Maximum adjacent site RPM + 1	Previously verified by 5' RACE?	Target gene common name	Interaction name	P-value adjusted for multiple testing
AT1G06580.1	miR400	1095	0	0.40809	1.40809	no	PPR1	miR400:PPR1	0
AT1G06580.1	miR161.1	874	3.5	1.24273	2.24273	yes	PPR1	miR161.1:PPR1	0
AT1G10120.1	miR396a-5p	1316	5.5	7.23386	8.23386	yes	NA	miR396a-5p:AT1G10120.1	0
AT1G12520.3	miR398a-3p	820	6	32.6247	21.4017	no	ATCCS	miR398a-3p:ATCCS	0
AT1G12820.1	miR393a-5p	1894	4	33.9289	24.1038	yes	AFB3	miR393a-5p:AFB3	0
AT1G17590.4	miR169h	1515	2.5	2.95814	3.95814	yes	NF-YA8	miR169h:NF-YA8	0
AT1G27340.1	miR394a	1382	1	4.62844	3.03732	yes	LCR	miR394a:LCR	0
AT1G27360.4	miR156j	1309	0	6.37052	5.0399	no	SPL11	miR156j:SPL11	0
AT1G27370.4	miR156j	1324	0	10.9077	7.69461	no	SPL10	miR156j:SPL10	0
AT1G30210.2	miR319a	1022	2.5	4.48489	5.48489	yes	ATTCP24	miR319a:ATTCP24	0
AT1G30490.1	miR165a-3p	805	3	7.48713	7.46189	yes	ATHB9	miR165a-3p:ATHB9	0
AT1G31280.1	miR403-3p	3232	1	44.6633	34.6227	yes	AGO2	miR403-3p:AGO2	0
AT1G33120.1	miR5630a	309	0	0.449105	0.655425	no	NA	miR5630a:AT1G33120.1	0
AT1G33140.1	miR5630a	309	0	1.52675	0.493815	no	PGY2	miR5630a:PGY2	0
AT1G47970.1	miR414	401	2	0.815156	0.976286	no	NA	miR414:AT1G47970.1	0
AT1G48410.3	miR168a-5p	531	5	4.55257	4.94422	yes	AGO1	miR168a-5p:AGO1	0
AT1G50055.1	miR173-5p	373	4.5	39.2372	28.2466	yes	TAS1b	miR173-5p:TAS1b	0
AT1G52150.3	miR166a-3p	1278	3	11.1681	8.64786	yes	ATHB-15	miR166a-3p:ATHB-15	0
AT1G53230.1	miR319c	1194	3.5	14.8717	12.4105	yes	TCP3	miR319c:TCP3	0
AT1G53910.3	miR396a-5p	591	6	8.09208	4.14887	no	RAP2.12	miR396a-5p:RAP2.12	0
AT1G54160.1	miR169h	1294	1.5	1.48061	2.30128	yes	NF-YA5	miR169h:NF-YA5	0
AT1G56010.2	miR164a	812	2	12.4047	12.5913	yes	anac021	miR164a:anac021	0
AT1G62590.1	miR161.2	1049	1	0.329138	1.15607	no	NA	miR161.2:AT1G62590.1	0
AT1G62720.1	miR400	995	1	0.314783	1.0347	no	AtNG1	miR400:AtNG1	0
AT1G63150.1	miR161.2	996	2.5	6.41051	3.18625	yes	NA	miR161.2:AT1G63150.1	0
AT1G63330.1	miR161.2	774	1	0.318885	1.13301	no	NA	miR161.2:AT1G63330.1	0
AT1G69170.1	miR156j	1306	0	0.120992	0.876531	yes	SPL6	miR156j:SPL6	0
AT1G72230.1	miR408-3p	823	6	43.4985	20.7918	no	NA	miR408-3p:AT1G72230.1	0
AT1G72830.3	miR169h	1423	2.5	4.78737	5.78737	yes	ATHAP2C	miR169h:ATHAP2C	0
AT1G77850.1	miR160a-5p	1419	0.5	91.5794	69.8153	yes	ARF17	miR160a-5p:ARF17	0
AT2G02850.1	miR408-3p	107	1	10.03	6.47532	yes	ARPN	miR408-3p:ARPN	0
AT2G18780.1	miR859	745	1.5	0.230704	1.2307	no	NA	miR859:AT2G18780.1	0
AT2G22740.2	miR778	1185	1.5	0.106637	0.658386	yes	SDG23	miR778:SDG23	0
AT2G22840.1	miR396a-5p	791	4	55.1158	33.8189	yes	AtGRF1	miR396a-5p:AtGRF1	0
AT2G27400.1	miR173-5p	378	2.5	74.4191	63.0678	yes	TAS1a	miR173-5p:TAS1a	0
AT2G28350.1	miR160a-5p	1339	2	33.4245	24.6813	yes	ARF10	miR160a-5p:ARF10	0
AT2G28550.3	miR172a	1612	3	3.50671	4.50671	no	RAP2.7	miR172a:RAP2.7	0
AT2G29130.1	miR397a	739	1.5	2.37472	3.37472	yes	ATLAC2	miR397a:ATLAC2	0
AT2G31070.1	miR319c	1390	2.5	1.173	2.173	yes	TCP10	miR319c:TCP10	0
AT2G33770.1	miR399a	617	1.5	0.506524	1.50652	yes	ATUBC24	miR399a:ATUBC24	0
AT2G33770.1	miR399a	750	1.5	1.60263	2.60263	yes	ATUBC24	miR399a:ATUBC24	0
AT2G33770.1	miR399f	839	1	0.287099	1.2871	yes	ATUBC24	miR399f:ATUBC24	0
AT2G33770.1	miR399e	896	1	1.39038	2.04449	yes	ATUBC24	miR399e:ATUBC24	0
AT2G33770.1	miR399a	953	1.5	0.838739	1.53235	yes	ATUBC24	miR399a:ATUBC24	0
AT2G33810.1	miR156a-5p	796	1.5	16.6794	8.46342	yes	SPL3	miR156a-5p:SPL3	0
AT2G34710.1	miR165a-3p	880	3	25.0176	20.811	yes	ATHB-14	miR165a-3p:ATHB-14	0
AT2G36400.1	miR396a-5p	756	4	7.68297	8.68297	yes	AtGRF3	miR396a-5p:AtGRF3	0
AT2G39675.1	miR173-5p	378	2.5	579.559	318.939	yes	TAS1c	miR173-5p:TAS1c	0
AT2G39681.1	miR173-5p	417	2.5	232.478	153.93	yes	TAS2	miR173-5p:TAS2	0
AT2G42200.1	miR156j	946	0	0.692113	1.45236	no	AtSPL9	miR156j:AtSPL9	0
AT2G45160.1	miR171a-3p	1013	0	102.076	3.97682	yes	ATHAM1	miR171a-3p:ATHAM1	0
AT2G45480.1	miR396a-5p	524	4	5.74813	4.74062	yes	AtGRF9	miR396a-5p:AtGRF9	0
AT2G46800.2	miR856	435	2	0.107662	0.925467	no	ATCDF1	miR856:ATCDF1	0
AT2G47460.1	miR858b	400	2.5	3.59899	3.07997	yes	ATMYB12	miR858b:ATMYB12	0
AT3G15030.3	miR319c	1310	3	6.80219	7.08977	yes	MEE35	miR319c:MEE35	0
AT3G15170.1	miR164a	674	2.5	2.31832	3.31832	yes	ANAC054	miR164a:ANAC054	0
AT3G15640.2	miR398a-3p	105	3	1.32578	2.32578	yes	NA	miR398a-3p:AT3G15640.2	0
AT3G17185.2	miR390a-5p	863	4.5	312.758	154.759	yes	TAS3a	miR390a-5p:TAS3a	0
AT3G19890.1	miR2939	321	1.5	1.27656	2.27656	no	NA	miR2939:AT3G19890.1	0
AT3G19910.1	miR414	634	1	0.0963832	0.650697	no	NA	miR414:AT3G19910.1	0
AT3G20910.1	miR169a-5p	1045	4	1.42934	1.95763	yes	NF-YA9	miR169a-5p:NF-YA9	0
AT3G23690.1	miR393a-5p	416	3	1.50419	2.50419	yes	NA	miR393a-5p:AT3G23690.1	0
AT3G25795.1	miR828	887	1	0.63982	1.63982	yes	TAS4	miR828:TAS4	0
AT3G26810.1	miR393a-5p	2009	4	9.9531	9.21462	yes	AFB2	miR393a-5p:AFB2	0
AT3G27200.1	miR398a-3p	268	5.5	41.0961	20.1719	no	NA	miR398a-3p:AT3G27200.1	0
AT3G52910.1	miR396a-5p	752	4	1.61391	2.07044	yes	AtGRF4	miR396a-5p:AtGRF4	0
AT3G57230.2	miR824-5p	596	0.5	42.2004	31.3187	yes	AGL16	miR824-5p:AGL16	0
AT3G57920.1	miR156j	854	0	0.825409	1.39163	yes	SPL15	miR156j:SPL15	0
AT3G58900.4	miR164c-3p	594	5	0.724924	1.72492	no	NA	miR164c-3p:AT3G58900.4	0
AT3G60250.2	miR397b	242	4	19.7842	11.4698	yes	CKB3	miR397b:CKB3	0
AT3G60630.1	miR171a-3p	1055	0	37.7453	1.53356	yes	ATHAM2	miR171a-3p:ATHAM2	0
AT3G62980.1	miR393a-5p	1721	2	16.2724	15.8429	yes	AtTIR1	miR393a-5p:AtTIR1	0
AT4G00150.1	miR171a-3p	866	0	22.6285	4.93847	yes	ATHAM3	miR171a-3p:ATHAM3	0
AT4G03190.1	miR393a-5p	1597	3	9.91209	8.7499	yes	AFB1	miR393a-5p:AFB1	0
AT4G04630.1	miR414	465	0	0.423471	1.42347	no	NA	miR414:AT4G04630.1	0
AT4G18390.2	miR319a	1136	2.5	7.77628	8.0575	yes	TCP2	miR319a:TCP2	0
AT4G24150.1	miR396a-5p	847	4	22.0389	15.7538	yes	AtGRF8	miR396a-5p:AtGRF8	0
AT4G26110.2	miR414	1111	2	0.16098	0.760796	no	ATNAP1;1	miR414:ATNAP1;1	0
AT4G30080.1	miR160a-5p	1518	2.5	80.1959	52.4678	yes	ARF16	miR160a-5p:ARF16	0
AT4G32880.1	miR165a-3p	944	3	0.329138	1.32914	no	ATHB-8	miR165a-3p:ATHB-8	0
AT4G36920.2	miR172c	1303	1	46.5777	33.1137	yes	AP2	miR172c:AP2	0
AT4G37740.1	miR396a-5p	920	4	6.71299	7.71299	yes	AtGRF2	miR396a-5p:AtGRF2	0
AT5G07680.2	miR164a	661	2.5	3.06683	3.62126	yes	ANAC079	miR164a:ANAC079	0
AT5G37020.2	miR167a-5p	2380	4	7.51584	5.46661	yes	ARF8	miR167a-5p:ARF8	0
AT5G39610.1	miR164c-5p	780	3	5.39848	5.71834	no	ANAC092	miR164c-5p:ANAC092	0
AT5G43270.3	miR156j	1111	0	9.31533	6.47682	yes	SPL2	miR156j:SPL2	0
AT5G43740.2	miR472-3p	642	1	1.89895	2.67159	yes	NA	miR472-3p:AT5G43740.2	0
AT5G43780.1	miR395a	405	1.5	0.714671	1.34398	yes	APS4	miR395a:APS4	0
AT5G49330.1	miR858a	385	3	14.1929	7.12275	yes	ATMYB111	miR858a:ATMYB111	0
AT5G50570.2	miR156j	976	0	2.0343	2.15177	no	SPL13	miR156j:SPL13	0
AT5G50670.1	miR156j	1111	0	2.0343	2.15177	no	SPL13	miR156j:SPL13	0
AT5G53660.1	miR396a-5p	539	4	2.49468	3.30171	yes	AtGRF7	miR396a-5p:AtGRF7	0
AT5G53950.1	miR164a	811	2.5	2.41368	3.41368	yes	ANAC098	miR164a:ANAC098	0
AT5G57735.1	miR390a-5p	428	4.5	24.7448	19.1919	yes	TAS3c	miR390a-5p:TAS3c	0
AT5G60120.2	miR172a	1820	1	53.3655	33.6584	yes	TOE2	miR172a:TOE2	0
AT5G60690.1	miR165a-3p	1272	3	3.90762	3.87467	yes	IFL	miR165a-3p:IFL	0
AT5G67180.1	miR172a	1308	3	11.6193	12.1341	yes	TOE3	miR172a:TOE3	0
AT5G60020.1	miR397a	752	2.5	0.972035	1.97203	yes	ATLAC17	miR397a:ATLAC17	9.59029e-05
AT1G06180.1	miR858a	402	3	3.38572	3.63939	yes	ATMYB13	miR858a:ATMYB13	0.00033303
AT1G64583.1	miR161.1	738	2.5	1.19043	2.19043	no	NA	miR161.1:AT1G64583.1	0.000548487
AT2G38080.1	miR397a	759	2.5	0.553691	1.55369	yes	ATLMCO4	miR397a:ATLMCO4	0.000657266
AT1G69770.1	miR823	2036	2.5	3.25344	2.55392	yes	CMT3	miR823:CMT3	0.00112106
AT2G39250.1	miR172e-3p	1054	2.5	0.74133	1.74133	yes	SNZ	miR172e-3p:SNZ	0.00121059
AT3G15270.1	miR156i	654	2	1.20787	1.57142	yes	SPL5	miR156i:SPL5	0.00141413
AT3G11440.1	miR159a	1165	3.5	12.1258	11.2462	yes	ATMYB65	miR159a:ATMYB65	0.00179146
AT5G06100.3	miR159a	1259	3.5	12.4355	12.3701	yes	ATMYB33	miR159a:ATMYB33	0.00179146
AT5G41170.1	miR161.2	891	3	1.98816	2.21403	yes	NA	miR161.2:AT5G41170.1	0.00245579
AT5G05700.1	miR414	1749	2.5	0.281972	1.21236	no	ATATE1	miR414:ATATE1	0.00370078
AT5G61430.1	miR164a	850	2.5	0.718772	1.71877	yes	ANAC100	miR164a:ANAC100	0.00382399
AT1G66230.1	miR858a	468	3	1.011	1.52715	yes	AtMYB20	miR858a:AtMYB20	0.00471358
AT5G10180.1	miR395a	135	2.5	0.0994592	1.09946	yes	AST68	miR395a:AST68	0.00544768
AT5G48380.1	miR5658	159	1	0.5096	1.4487	no	BIR1	miR5658:BIR1	0.00668631
AT1G62670.1	miR161.1	978	2.5	0.40809	1.40809	no	RPF2	miR161.1:RPF2	0.00705153
AT1G04530.1	miR414	809	2.5	1.26631	1.05287	no	TPR4	miR414:TPR4	0.0102681
AT3G24660.1	miR390a-5p	484	3.5	0.540361	1.54036	no	TMKL1	miR390a-5p:TMKL1	0.010449
AT1G51760.1	miR167a-5p	862	3	1.36167	1.38312	no	IAR3	miR167a-5p:IAR3	0.0112012
AT1G54740.1	miR5658	870	3	0.781319	1.78132	no	NA	miR5658:AT1G54740.1	0.0112512
AT3G19890.1	miR4243	502	2.5	0.28915	1.17692	no	NA	miR4243:AT3G19890.1	0.0146362
AT1G02860.2	miR827	268	1	0.351696	1.16943	yes	BAH1	miR827:BAH1	0.015076
AT5G63740.1	miR414	295	2.5	0.0902311	0.978827	no	NA	miR414:AT5G63740.1	0.0153987
AT3G14560.1	miR824-5p	294	4.5	2.20553	2.22784	no	NA	miR824-5p:AT3G14560.1	0.0165296
AT2G41720.2	miR161.2	962	4.5	1.34526	1.71424	no	EMB2654	miR161.2:EMB2654	0.0177262
AT2G35670.1	miR414	211	2.5	0.00102535	0.913025	no	FIE2	miR414:FIE2	0.0198402
AT5G43060.1	miR396b-5p	518	3	0.897184	1.24575	no	RD21B	miR396b-5p:RD21B	0.0235629
AT4G32590.4	miR5021	211	2	0.481916	1.48192	no	NA	miR5021:AT4G32590.4	0.024412
AT1G61260.1	miR414	324	3.5	0.451155	1.45115	no	NA	miR414:AT1G61260.1	0.0303867
AT1G03530.1	miR414	1032	2.5	0.135347	0.817615	no	ATNAF1	miR414:ATNAF1	0.0313906
AT1G30330.2	miR167a-5p	3246	5	2.24347	1.9463	no	ARF6	miR167a-5p:ARF6	0.0329411
AT2G39020.1	miR414	909	2.5	0.569071	0.901607	no	NA	miR414:AT2G39020.1	0.0331509
AT4G18905.2	miR414	564	2.5	0.18969	0.77389	no	NA	miR414:AT4G18905.2	0.0375843
AT1G70700.2	miR169d	787	2.5	0.253262	0.85219	no	JAZ9	miR169d:JAZ9	0.0413463
AT1G03530.1	miR414	1026	2.5	0.0194817	0.734175	no	ATNAF1	miR414:ATNAF1	0.0426227
AT5G65060.2	miR2112-3p	717	5	1.22632	1.89751	no	AGL70	miR2112-3p:AGL70	0.043748
AT1G17940.1	miR5021	72	2	0.366051	1.36605	no	NA	miR5021:AT1G17940.1	0.0438276
AT5G13630.2	miR395a	3577	2.5	1.89485	0.514044	no	ABAR	miR395a:ABAR	0.045553
AT3G62610.1	miR858a	300	3.5	0.642896	1.22848	no	ATMYB11	miR858a:ATMYB11	0.0468937
AT3G25910.1	miR414	1319	2.5	0.146625	0.787365	no	NA	miR414:AT3G25910.1	0.0471014
AT1G47970.1	miR414	371	2.5	0.649048	0.665876	no	NA	miR414:AT1G47970.1	0.0508849
AT1G62500.1	miR161.2	778	5	1.28169	1.5903	no	NA	miR161.2:AT1G62500.1	0.0508849
AT2G26550.3	miR414	368	3	0.657251	1.09483	no	HO2	miR414:HO2	0.0508849
AT5G49400.1	miR414	565	2.5	0.0738254	0.667788	no	NA	miR414:AT5G49400.1	0.0508849
AT1G59710.1	miR414	926	2.5	0.237882	0.657817	no	NA	miR414:AT1G59710.1	0.0516362
AT1G63980.2	miR414	889	2.5	0.133296	0.658186	no	NA	miR414:AT1G63980.2	0.0516362
AT3G05690.1	miR169d	1194	3	0.775167	1.23638	yes	ATHAP2B	miR169d:ATHAP2B	0.0521556
AT1G27630.1	miR165a-5p	238	5.5	0.648023	1.64802	no	CYCT1;3	miR165a-5p:CYCT1;3	0.053714
AT1G55760.1	miR838	449	3.5	0.17431	1.17431	no	NA	miR838:AT1G55760.1	0.0611115
AT1G62930.1	miR400	1196	2	0.0533183	0.873329	no	RPF3	miR400:RPF3	0.0613773
AT1G63130.1	miR400	1323	2	0.0533183	0.873329	no	TAS8	miR400:TAS8	0.0613773
AT5G12840.4	miR169b-5p	1129	3	0.307606	1.09159	yes	ATHAP2A	miR169b-5p:ATHAP2A	0.0614233
AT3G56150.2	miR414	688	2.5	0.0625465	0.539368	no	ATEIF3C-1	miR414:ATEIF3C-1	0.0627715
AT1G60120.1	miR396b-5p	869	3.5	0.191741	1.19174	no	NA	miR396b-5p:AT1G60120.1	0.0642864
AT1G05310.1	miR5658	241	2	0.052293	1.04799	no	NA	miR5658:AT1G05310.1	0.0646071
AT4G12650.1	miR4227	625	3.5	0.529082	1.1531	no	NA	miR4227:AT4G12650.1	0.0725021
AT5G37780.3	miR414	638	2.5	0.196868	0.371356	no	ACAM-1	miR414:ACAM-1	0.0725021
AT3G22890.1	miR395a	452	3.5	0.724924	1.12883	yes	APS1	miR395a:APS1	0.0728353
AT2G32250.4	miR775	2733	4	0.437826	1.26986	no	FRS2	miR775:FRS2	0.0783173
AT1G19500.1	miR397b	281	3.5	0.334265	1.03417	no	NA	miR397b:AT1G19500.1	0.082883
AT3G53760.1	miR395b	2129	4	0.519854	1.21074	no	ATGCP4	miR395b:ATGCP4	0.082883
AT1G60140.1	miR396b-5p	2296	3.5	0.18764	1.10811	no	ATTPS10	miR396b-5p:ATTPS10	0.086388
AT2G34530.2	miR396b-5p	783	3.5	0.087155	1.08716	no	NA	miR396b-5p:AT2G34530.2	0.0958181
AT1G02660.1	miR393b-3p	2054	4	0.615212	1.42138	no	NA	miR393b-3p:AT1G02660.1	0.0968733
AT1G63070.1	miR161.2	969	3.5	0.113814	1.11381	no	NA	miR161.2:AT1G63070.1	0.107011
AT1G75150.1	miR414	1640	3	0.00205071	0.917392	no	NA	miR414:AT1G75150.1	0.111092
AT5G44200.2	miR414	905	3.5	0.514727	1.19398	no	ATCBP20	miR414:ATCBP20	0.111422
AT5G09410.3	miR159b-3p	2769	5	0.948451	1.42956	no	CAMTA1	miR159b-3p:CAMTA1	0.114448
AT1G53290.1	miR775	524	3.5	0.46551	1.01491	yes	NA	miR775:AT1G53290.1	0.119097
AT5G17800.1	miR773b-3p	309	5	0.390659	1.39066	no	AtMYB56	miR773b-3p:AtMYB56	0.126032
AT5G57870.2	miR5021	54	2	0.0861296	0.942185	no	eIFiso4G1	miR5021:eIFiso4G1	0.131273
AT4G02510.1	miR837-5p	1901	4.5	0.824384	1.33853	no	ATTOC159	miR837-5p:ATTOC159	0.133207
AT3G27580.2	miR5021	68	3	0.235831	1.23583	no	ATPK7	miR5021:ATPK7	0.13385
AT5G21930.3	miR408-3p	2211	6	0.910513	1.48082	no	ATHMA8	miR408-3p:ATHMA8	0.137725
AT5G26020.1	miR414	550	3.5	0.0194817	1.00709	no	NA	miR414:AT5G26020.1	0.137725
AT4G22190.1	miR156i	180	3.5	0.74133	1.34861	no	NA	miR156i:AT4G22190.1	0.139367
AT3G43686.1	miR414	217	3.5	0.0194817	0.998995	no	NA	miR414:AT3G43686.1	0.141709
AT1G62910.1	miR161.1	987	2.5	0.488068	0.449273	yes	RFL9	miR161.1:RFL9	0.142133
AT1G62930.1	miR161.1	975	2.5	0.488068	0.449273	no	RPF3	miR161.1:RPF3	0.142133
AT4G06567.1	miR414	395	3.5	0.0194817	0.994996	no	NA	miR414:AT4G06567.1	0.143058
AT4G35310.1	miR169f-3p	541	5	1.2212	1.64953	no	ATCPK5	miR169f-3p:ATCPK5	0.143898
AT5G60890.1	miR858a	638	4.5	0.499347	1.25811	no	ATMYB34	miR858a:ATMYB34	0.144419
AT1G63010.5	miR827	214	5	0.695189	1.37398	no	NA	miR827:AT1G63010.5	0.1468
AT3G48430.1	miR414	3190	5	0.731077	1.53163	no	JMJ12	miR414:JMJ12	0.151048
AT3G14110.3	miR396b-5p	773	4.5	1.08277	1.28296	no	FLU	miR396b-5p:FLU	0.154713
AT2G02810.1	miR407	1239	2.5	0.410141	0.777749	no	ATUTR1	miR407:ATUTR1	0.155205
AT1G63400.1	miR161.2	999	2	0.500372	0.596944	yes	NA	miR161.2:AT1G63400.1	0.16559
AT5G04590.1	miR172e-3p	376	4.5	0.936147	1.30471	no	SIR	miR172e-3p:SIR	0.16559
AT5G06510.3	miR169d	1239	3	0.111763	0.811416	yes	NF-YA10	miR169d:NF-YA10	0.16559
AT3G02830.1	miR5658	240	4	0.33529	1.22709	no	PNT1	miR5658:PNT1	0.166555
AT1G62680.1	miR5658	1915	2.5	0.00512676	0.757979	no	NA	miR5658:AT1G62680.1	0.168757
AT2G43850.2	miR5014a-3p	1687	5	1.5329	1.49417	no	NA	miR5014a-3p:AT2G43850.2	0.169393
AT3G01500.3	miR5658	1175	2	1.30322	0.629159	no	ATBCA1	miR5658:ATBCA1	0.172002
AT3G04260.1	miR414	2008	3	0.534209	0.906133	no	PDE324	miR414:PDE324	0.172002
AT1G75840.1	miR865-3p	200	6	1.21607	1.50688	no	ARAC5	miR865-3p:ARAC5	0.177978
AT4G10380.1	miR5021	34	1.5	0.225578	0.446954	no	AtNIP5;1	miR5021:AtNIP5;1	0.177978
AT3G57870.1	miR397b	279	3.5	0.502423	0.956899	no	AHUS5	miR397b:AHUS5	0.178954
AT1G30450.3	miR157d	1091	3	0.265566	0.870265	no	ATCCC1	miR157d:ATCCC1	0.17956
AT1G66730.1	miR172d-5p	2882	5.5	0.426547	1.42655	no	AtLIG6	miR172d-5p:AtLIG6	0.17956
AT4G21510.1	miR403-3p	379	4	0.192766	1.09097	no	AtFBS2	miR403-3p:AtFBS2	0.185341
AT3G04820.1	miR3434-5p	1403	3.5	0.0922818	1.09228	no	NA	miR3434-5p:AT3G04820.1	0.185706
AT1G56130.1	miR390a-5p	347	5	0.301454	1.30145	no	NA	miR390a-5p:AT1G56130.1	0.18596
AT1G06950.1	miR414	2122	3	0.177386	0.760812	no	ATTIC110	miR414:ATTIC110	0.185963
AT1G71030.1	miR858a	342	4.5	0.350671	1.35067	no	ATMYBL2	miR858a:ATMYBL2	0.186956
AT3G26370.1	miR5021	1892	2	0.0820282	0.975955	no	NA	miR5021:AT3G26370.1	0.187789
AT2G06050.3	miR844-3p	988	3	0.0851043	0.84847	no	AtOPR3	miR844-3p:AtOPR3	0.19063
AT2G04842.1	miR850	1664	6	1.46523	1.65438	no	EMB2761	miR850:EMB2761	0.193754
AT5G22080.2	miR847	594	4.5	0.85822	1.15559	no	NA	miR847:AT5G22080.2	0.200455
AT5G11240.1	miR854a	1281	5.5	0.640846	1.64085	no	NA	miR854a:AT5G11240.1	0.202095
AT4G21520.1	miR414	1192	5.5	0.893082	1.36028	no	NA	miR414:AT4G21520.1	0.202921
AT1G60870.1	miR414	693	3	0.764913	0.726191	no	MEE9	miR414:MEE9	0.203451
AT5G28400.1	miR414	1096	4	0.0645972	1.0646	no	NA	miR414:AT5G28400.1	0.205231
AT1G20100.2	miR5021	24	4.5	0.537285	1.53729	no	NA	miR5021:AT1G20100.2	0.205907
AT3G20770.1	miR5021	79	2	0.00102535	0.916453	no	AtEIN3	miR5021:AtEIN3	0.205907
AT5G63950.1	miR414	1046	4	0.221476	1.21154	no	CHR24	miR414:CHR24	0.205907
AT1G52710.2	miR414	367	5.5	0.533183	1.53318	no	NA	miR414:AT1G52710.2	0.20717
AT1G67350.2	miR854a	355	5	1.69696	1.50536	no	NA	miR854a:AT1G67350.2	0.209556
AT4G38480.1	miR414	1407	3.5	0.00615212	0.869712	no	NA	miR414:AT4G38480.1	0.21199
AT3G45850.2	miR830-5p	2711	3.5	0.170209	0.928413	no	NA	miR830-5p:AT3G45850.2	0.213063
AT5G64640.1	miR156a-5p	1370	5	0.484992	1.3419	no	NA	miR156a-5p:AT5G64640.1	0.220825
AT3G06130.2	miR414	855	3	0.561893	0.681166	no	NA	miR414:AT3G06130.2	0.225404
AT5G61010.2	miR414	2589	4	0.318885	1.04213	no	ATEXO70E2	miR414:ATEXO70E2	0.234133
AT3G13200.1	miR414	505	3	0.977161	0.716757	no	EMB2769	miR414:EMB2769	0.251061
AT4G12610.2	miR414	898	3	0.154828	0.718161	no	ATRAP74	miR414:ATRAP74	0.251061
AT3G14770.1	miR172a	1276	3.5	0.186614	0.967399	no	AtSWEET2	miR172a:AtSWEET2	0.252723
AT4G16660.1	miR157c-3p	947	6	1.22735	1.57266	no	NA	miR157c-3p:AT4G16660.1	0.253311
AT1G15280.2	miR414	188	3.5	0.0840789	0.925587	no	NA	miR414:AT1G15280.2	0.253417
AT3G56150.2	miR414	682	3	0.228654	0.623687	no	ATEIF3C-1	miR414:ATEIF3C-1	0.258816
AT1G18880.1	miR5628	734	6	0.745432	1.52633	no	NRT1.9	miR5628:NRT1.9	0.259754
AT5G20190.1	miR414	448	3.5	0.428598	0.91767	no	NA	miR414:AT5G20190.1	0.260869
AT3G14900.1	miR2939	544	4.5	0.274795	1.27479	no	EMB3120	miR2939:EMB3120	0.260991
AT5G45500.2	miR5016	1591	4.5	0.239933	1.23993	no	NA	miR5016:AT5G45500.2	0.260991
AT1G62910.1	miR161.2	996	3	2.31217	0.724233	yes	RFL9	miR161.2:RFL9	0.264365
AT1G62930.1	miR161.2	984	3	2.31217	0.724233	no	RPF3	miR161.2:RPF3	0.264365
AT3G58220.2	miR774b-3p	1154	4	0.469612	1.17263	no	NA	miR774b-3p:AT3G58220.2	0.264578
AT4G03550.1	miR396a-5p	1168	5.5	0.326062	1.32606	no	ATGSL05	miR396a-5p:ATGSL05	0.267753
AT2G47940.2	miR1886.1	47	4	1.02228	1.09372	no	DEG2	miR1886.1:DEG2	0.269222
AT5G55840.1	miR161.2	1128	4.5	0.268642	1.26864	no	NA	miR161.2:AT5G55840.1	0.269677
AT3G20898.1	miR8181	235	4.5	0.102535	1.10254	no	NA	miR8181:AT3G20898.1	0.271739
AT4G27330.1	miR159a	547	4.5	0.627516	1.09598	no	NZZ	miR159a:NZZ	0.271739
AT1G69670.1	miR858a	1751	4.5	0.375279	1.23361	no	ATCUL3B	miR858a:ATCUL3B	0.27217
AT5G04810.1	miR414	2809	3	0.0974085	0.625425	no	NA	miR414:AT5G04810.1	0.279552
AT1G04210.1	miR415	2635	3	0.107662	0.833369	no	NA	miR415:AT1G04210.1	0.282128
AT4G19112.1	miR426	456	5	0.724924	1.24403	no	CPuORF25	miR426:CPuORF25	0.288841
AT2G11910.2	miR414	502	3	0.299403	0.579385	no	NA	miR414:AT2G11910.2	0.288971
AT2G46915.1	miR854a	473	5.5	0.488068	1.48807	no	NA	miR854a:AT2G46915.1	0.288971
AT5G57170.2	miR8183	150	6	0.815156	1.535	no	NA	miR8183:AT5G57170.2	0.288971
AT2G35170.1	miR5021	11	5	0.358874	1.35887	no	NA	miR5021:AT2G35170.1	0.289966
AT5G53440.1	miR414	3427	3	0.0994592	0.572712	no	NA	miR414:AT5G53440.1	0.290373
AT2G11910.2	miR414	313	3	0.162006	0.567125	no	NA	miR414:AT2G11910.2	0.291629
AT2G03220.1	miR158a-3p	1500	4	0.312733	1.03643	no	ATFT1	miR158a-3p:ATFT1	0.292144
AT2G25760.2	miR773a	2002	4.5	0.390659	1.06939	no	NA	miR773a:AT2G25760.2	0.293054
AT3G63400.3	miR4221	1343	4	0.373228	0.904136	no	NA	miR4221:AT3G63400.3	0.293829
AT5G10380.1	miR415	151	5	0.847967	1.26451	no	ATRING1	miR415:ATRING1	0.293829
AT4G09730.1	miR399d	1928	3.5	0.18969	0.858017	no	RH39	miR399d:RH39	0.297734
AT5G46720.1	miR414	330	4	0.087155	1.08716	no	NA	miR414:AT5G46720.1	0.308953
AT5G41600.1	miR5021	68	2.5	0.0922818	0.802603	no	BTI3	miR5021:BTI3	0.309649
AT5G01430.2	miR5021	59	3	0.396812	0.989109	no	NA	miR5021:AT5G01430.2	0.322233
AT4G31770.1	miR171c-5p	477	5	0.184564	1.18456	no	ATDBR1	miR171c-5p:ATDBR1	0.335278
AT2G16600.2	miR773b-5p	405	5	14.3406	1.19516	no	ROC3	miR773b-5p:ROC3	0.339531
AT4G37730.1	miR413	920	6	0.677758	1.31822	no	AtbZIP7	miR413:AtbZIP7	0.339531
AT5G62680.1	miR158a-5p	2178	4.5	0.488068	1.06768	no	GTR2	miR158a-5p:GTR2	0.339531
AT3G11330.1	miR5658	200	3	0.172259	0.674787	no	PIRL9	miR5658:PIRL9	0.340867
AT3G06500.1	miR399b	1890	5	0.631617	1.09798	no	A/N-InvC	miR399b:A/N-InvC	0.344325
AT2G18220.1	miR414	1980	4	0.244034	0.910679	no	NA	miR414:AT2G18220.1	0.347536
AT1G18800.1	miR414	830	3.5	0.666479	0.777914	no	NRP2	miR414:NRP2	0.360513
AT2G27500.3	miR415	965	4.5	0.221476	1.12461	no	NA	miR415:AT2G27500.3	0.362631
AT1G19870.1	miR4227	2242	4	0.766964	0.904476	no	iqd32	miR4227:iqd32	0.363879
AT2G48110.1	miR167d	3382	5	0.163031	1.16303	no	MED33B	miR167d:MED33B	0.363879
AT4G09460.1	miR858a	353	4	0.556767	0.870434	no	AtMYB6	miR858a:AtMYB6	0.363879
AT5G45950.1	miR159a	876	3.5	1.09303	0.502248	no	NA	miR159a:AT5G45950.1	0.364349
AT2G32810.2	miR857	1117	4.5	0.562919	1.06201	no	BGAL9	miR857:BGAL9	0.364773
AT2G41530.1	miR5021	101	4	0.407065	1.15485	no	ATSFGH	miR5021:ATSFGH	0.364773
AT3G44680.1	miR5021	18	4.5	0.215324	1.21532	no	HDA09	miR5021:HDA09	0.364773
AT3G55190.1	miR5020b	121	4.5	0.0953578	1.09536	no	NA	miR5020b:AT3G55190.1	0.364773
AT1G06040.2	miR1886.1	706	3.5	1.51342	0.778609	no	BBX24	miR1886.1:BBX24	0.371864
AT1G50200.2	miR160a-5p	1150	5	0.394761	1.09675	no	ACD	miR160a-5p:ACD	0.384274
AT2G35510.1	miR172b-5p	1150	5	0.237882	1.12695	no	SRO1	miR172b-5p:SRO1	0.384274
AT2G39810.1	miR2937	1582	4	0.105611	0.908959	no	ESD6	miR2937:ESD6	0.384274
AT3G19400.2	miR396b-5p	489	4	0.345544	0.838367	no	NA	miR396b-5p:AT3G19400.2	0.384274
AT4G22200.1	miR838	2759	4	0.297352	0.855334	no	AKT2	miR838:AKT2	0.384274
AT5G48600.2	miR837-5p	2731	4	0.356823	0.854677	no	ATCAP-C	miR837-5p:ATCAP-C	0.384274
AT2G33430.1	miR414	783	3.5	0.087155	0.752889	no	DAL	miR414:DAL	0.384694
AT1G72175.1	miR156h	724	5	0.324012	1.32401	no	NA	miR156h:AT1G72175.1	0.39887
AT2G31060.3	miR773b-3p	1561	5.5	0.339392	1.33939	no	EMB2785	miR773b-3p:EMB2785	0.39887
AT5G45930.1	miR2111a-5p	1052	4	0.228654	0.850278	no	CHL I2	miR2111a-5p:CHL I2	0.398906
AT5G56930.1	miR396b-5p	411	6	0.393736	1.29298	no	EMB1789	miR396b-5p:EMB1789	0.409114
AT3G50240.1	miR774b-3p	902	5	0.117916	1.11792	no	KICP-02	miR774b-3p:KICP-02	0.411099
AT1G68790.1	miR773b-3p	1588	4.5	0.366051	0.952118	no	CRWN3	miR773b-3p:CRWN3	0.41478
AT3G15355.1	miR5025	2109	4	0.196868	0.890183	no	PFU1	miR5025:PFU1	0.41478
AT4G37000.1	miR838	799	4.5	0.598806	0.975599	no	ACD2	miR838:ACD2	0.41478
AT1G23040.1	miR8181	290	4.5	0.113814	1.11381	no	NA	miR8181:AT1G23040.1	0.414878
AT5G61790.1	miR414	1023	4	0.578299	0.846092	no	ATCNX1	miR414:ATCNX1	0.418897
AT2G33580.1	miR824-5p	847	4	0.371178	0.886038	no	LYK5	miR824-5p:LYK5	0.421752
AT5G58870.1	miR397b	2081	4	0.270693	0.784215	no	ftsh9	miR397b:ftsh9	0.421922
AT1G13730.1	miR858b	800	4.5	0.452181	0.934049	no	NA	miR858b:AT1G13730.1	0.425744
AT1G69870.1	miR838	1244	5	1.16275	1.07986	no	NRT1.7	miR838:NRT1.7	0.425744
AT2G07050.1	miR5654-5p	671	5.5	0.473713	1.18658	no	CAS1	miR5654-5p:CAS1	0.425744
AT2G19740.1	miR847	414	3.5	0.110738	0.476945	no	NA	miR847:AT2G19740.1	0.425744
AT2G43018.1	miR5651	1458	3.5	0.146625	0.414441	no	CPuORF17	miR5651:CPuORF17	0.425744
AT2G43020.1	miR5651	1459	3.5	0.146625	0.414441	no	ATPAO2	miR5651:ATPAO2	0.425744
AT3G29075.1	miR414	531	3.5	0.104586	0.527745	no	NA	miR414:AT3G29075.1	0.425744
AT3G51150.2	miR166a-5p	835	5.5	0.804902	1.1733	no	NA	miR166a-5p:AT3G51150.2	0.425744
AT5G44450.1	miR5662	38	5	0.234806	1.1231	no	NA	miR5662:AT5G44450.1	0.425744
AT4G00450.1	miR5029	6403	6	0.476789	1.47679	no	CCT	miR5029:CCT	0.427641
AT4G31390.2	miR773b-3p	419	5	0.214299	1.2143	no	ACDO1	miR773b-3p:ACDO1	0.427641
AT2G16710.3	miR866-3p	455	5	0.778243	1.26288	no	NA	miR866-3p:AT2G16710.3	0.433733
AT5G08650.1	miR157c-3p	22	5	0.227628	1.22763	no	NA	miR157c-3p:AT5G08650.1	0.433733
AT4G32200.1	miR408-3p	3766	5.5	0.194817	1.10111	no	ASY2	miR408-3p:ASY2	0.434202
AT3G07050.1	miR172b-5p	1235	4.5	0.890006	0.990329	no	NSN1	miR172b-5p:NSN1	0.435329
AT1G69980.1	miR831-3p	128	4.5	0.534209	0.907783	no	NA	miR831-3p:AT1G69980.1	0.436783
AT2G34670.2	miR169f-3p	1995	6	0.46551	1.46551	no	NA	miR169f-3p:AT2G34670.2	0.438631
AT2G06990.1	miR157c-3p	3107	4	0.0799775	0.887136	no	HEN2	miR157c-3p:HEN2	0.438864
AT1G76550.1	miR5020a	1898	4.5	0.432699	0.997146	no	NA	miR5020a:AT1G76550.1	0.440059
AT1G80780.3	miR5658	209	3.5	0.190716	0.68744	no	NA	miR5658:AT1G80780.3	0.441116
AT3G42670.1	miR398a-3p	839	6	0.277871	1.16881	no	CHR38	miR398a-3p:CHR38	0.441116
AT4G20320.2	miR826b	912	6	0.88693	1.29663	no	NA	miR826b:AT4G20320.2	0.441116
AT1G77400.1	miR3933	700	4	0.369127	0.872572	no	NA	miR3933:AT1G77400.1	0.441457
AT1G62380.1	miR2939	1182	3.5	2.07019	0.674041	no	ACO2	miR2939:ACO2	0.442795
AT5G54190.2	miR5658	117	6	0.322986	1.32299	no	PORA	miR5658:PORA	0.457047
AT3G53110.1	miR5648-3p	1674	4	0.517803	0.860487	no	LOS4	miR5648-3p:LOS4	0.465557
AT3G59370.1	miR838	208	5	0.337341	1.0457	no	NA	miR838:AT3G59370.1	0.465557
AT5G06220.2	miR399f	792	5.5	0.122017	1.12202	no	NA	miR399f:AT5G06220.2	0.465557
AT1G47970.1	miR414	638	3.5	0.714671	0.334436	no	NA	miR414:AT1G47970.1	0.466702
AT3G08943.1	miR156j	2893	3.5	0.123042	0.748509	no	NA	miR156j:AT3G08943.1	0.466702
AT3G25520.2	miR414	699	3.5	0.484992	0.330635	no	ATL5	miR414:ATL5	0.466702
AT4G35630.1	miR5021	1530	3	0.17431	0.814403	no	PSAT	miR5021:PSAT	0.472095
AT2G19572.1	miR847	390	4.5	0.119966	0.891453	no	NA	miR847:AT2G19572.1	0.47901
AT5G51840.1	miR839-5p	776	4	0.143549	0.796468	no	NA	miR839-5p:AT5G51840.1	0.479177
AT1G20696.3	miR5021	727	2.5	0.338366	0.45302	no	HMGB3	miR5021:HMGB3	0.487014
AT5G52280.1	miR869.2	829	4.5	0.226603	0.894561	no	NA	miR869.2:AT5G52280.1	0.487944
AT2G39570.1	miR156f-3p	1310	4.5	0.293251	1.01366	no	ACR9	miR156f-3p:ACR9	0.49381
AT5G07680.2	miR399e	360	6	0.354772	1.35477	no	ANAC079	miR399e:ANAC079	0.49381
AT3G48185.1	miR5021	34	6	0.357848	1.23964	no	NA	miR5021:AT3G48185.1	0.495859
AT4G22190.1	miR5021	149	5	0.490119	1.33417	no	NA	miR5021:AT4G22190.1	0.496584
AT5G52650.1	miR866-3p	155	5	0.415268	1.21048	no	NA	miR866-3p:AT5G52650.1	0.497954
AT1G73660.1	miR842	2708	4.5	0.245059	1.06117	no	NA	miR842:AT1G73660.1	0.498074
AT1G43620.3	miR5014a-5p	1437	4.5	0.37733	1.08305	no	TT15	miR5014a-5p:TT15	0.49926
AT5G64640.1	miR866-3p	1669	3.5	0.154828	0.620785	no	NA	miR866-3p:AT5G64640.1	0.500251
AT2G18670.1	miR169f-3p	711	6	0.369127	1.36913	no	NA	miR169f-3p:AT2G18670.1	0.505152
AT1G16720.1	miR868-3p	1851	4	0.388609	0.763714	no	HCF173	miR868-3p:HCF173	0.513089
AT1G62800.2	miR390a-5p	568	5.5	0.0984339	1.09843	no	ASP4	miR390a-5p:ASP4	0.521279
AT3G07870.1	miR5021	24	3	0.0102535	0.777475	no	NA	miR5021:AT3G07870.1	0.521279
AT3G26300.1	miR837-5p	454	4.5	0.556767	0.877476	no	CYP71B34	miR837-5p:CYP71B34	0.524973
AT5G35715.1	miR159a	401	5.5	0.311707	1.11505	no	CYP71B8	miR159a:CYP71B8	0.524973
AT1G69200.1	miR414	1816	5.5	0.506524	1.26197	no	FLN2	miR414:FLN2	0.52573
AT5G49760.1	miR5643a	1881	4	0.0953578	0.869736	no	NA	miR5643a:AT5G49760.1	0.52573
AT5G01090.1	miR838	1282	4	0.15893	0.828481	no	NA	miR838:AT5G01090.1	0.525789
AT3G18240.2	miR5645a	684	4.5	0.244034	0.91411	no	NA	miR5645a:AT3G18240.2	0.525857
AT5G08280.1	miR847	1357	4.5	1.24888	0.8634	no	HEMC	miR847:HEMC	0.525857
AT5G28770.3	miR837-5p	429	6	0.466536	1.36181	no	AtbZIP63	miR837-5p:AtbZIP63	0.526412
AT2G33830.2	miR823	129	6	0.836688	1.38186	no	NA	miR823:AT2G33830.2	0.527748
AT3G06860.1	miR780.1	353	4.5	0.0625465	0.948731	no	ATMFP2	miR780.1:ATMFP2	0.527748
AT3G24180.2	miR5017-5p	2545	5	0.463459	1.21133	no	NA	miR5017-5p:AT3G24180.2	0.527748
AT5G07460.1	miR413	590	5	0.257364	0.996749	no	ATMSRA2	miR413:ATMSRA2	0.53786
AT2G16750.1	miR159b-3p	711	5.5	0.10151	1.10151	no	NA	miR159b-3p:AT2G16750.1	0.538214
AT2G25520.1	miR829-5p	332	4	0.287099	0.709085	no	NA	miR829-5p:AT2G25520.1	0.538214
AT2G34140.1	miR5658	194	6	0.236857	1.23686	no	NA	miR5658:AT2G34140.1	0.538214
AT1G10120.1	miR5663-3p	2050	4	0.46551	0.763389	no	NA	miR5663-3p:AT1G10120.1	0.538355
AT2G27030.3	miR5021	34	3	0.246085	0.748195	no	ACAM-2	miR5021:ACAM-2	0.538355
AT5G14740.5	miR5658	1342	3.5	0.206096	0.526939	no	BETA CA2	miR5658:BETA CA2	0.538355
AT5G40690.1	miR414	626	4.5	0.546513	0.87473	no	NA	miR414:AT5G40690.1	0.538355
AT1G47530.1	miR158a-3p	447	4	0.207121	0.915971	no	NA	miR158a-3p:AT1G47530.1	0.539601
AT1G55690.3	miR832-3p	1115	5	0.394761	1.12024	no	NA	miR832-3p:AT1G55690.3	0.539601
AT2G39770.2	miR773b-3p	378	4	0.10151	0.767188	no	CYT1	miR773b-3p:CYT1	0.539601
AT4G24520.2	miR835-5p	728	6	0.904361	1.33303	no	AR1	miR835-5p:AR1	0.539601
AT4G26400.2	miR5658	555	5	0.311707	1.19864	no	NA	miR5658:AT4G26400.2	0.539601
AT5G56950.1	miR414	1097	4	0.256338	0.836208	no	NAP1;3	miR414:NAP1;3	0.539601
AT5G65430.3	miR5021	128	3.5	0.135347	1.04334	no	14-3-3KAPPA	miR5021:14-3-3KAPPA	0.539601
AT5G67510.1	miR5021	504	3.5	0.540361	1.04305	no	NA	miR5021:AT5G67510.1	0.539601
AT3G09200.2	miR5662	663	3.5	0.430648	0.249411	no	NA	miR5662:AT3G09200.2	0.548235
AT3G23810.1	miR172d-5p	976	3.5	0.6552	0.191986	no	ATSAHH2	miR172d-5p:ATSAHH2	0.549287
AT1G14750.2	miR838	541	6	0.152778	1.15278	no	SDS	miR838:SDS	0.551822
AT2G39830.1	miR5658	1522	6	0.359899	1.22206	no	DAR2	miR5658:DAR2	0.552653
AT3G53630.1	miR838	560	4.5	0.316834	0.855456	no	NA	miR838:AT3G53630.1	0.552653
AT4G16120.1	miR5014b	1220	5	0.238907	0.984518	no	ATSEB1	miR5014b:ATSEB1	0.552653
AT1G80410.2	miR157c-3p	429	6	0.439876	1.14984	no	EMB2753	miR157c-3p:EMB2753	0.552849
AT1G27370.4	miR4245	1614	6	2.73359	1.15111	no	SPL10	miR4245:SPL10	0.555859
AT4G25370.1	miR824-3p	564	4	0.151752	0.610384	no	NA	miR824-3p:AT4G25370.1	0.555859
AT5G57700.4	miR5014a-3p	1021	4.5	0.309657	0.880712	no	NA	miR5014a-3p:AT5G57700.4	0.555859
AT1G07170.3	miR5021	80	6	0.359899	1.3599	no	NA	miR5021:AT1G07170.3	0.562566
AT1G14670.1	miR156h	1102	4	0.263516	0.984816	no	NA	miR156h:AT1G14670.1	0.565665
AT3G02885.1	miR863-3p	458	4.5	0.371178	1.02688	no	GASA5	miR863-3p:GASA5	0.565665
AT1G15690.2	miR414	2086	4	0.976136	0.698978	no	AtAVP1	miR414:AtAVP1	0.567261
AT2G21470.3	miR4221	1796	4.5	0.443978	0.813903	no	ATSAE2	miR4221:ATSAE2	0.567513
AT1G80020.1	miR167a-3p	1188	5.5	0.352721	1.06198	no	NA	miR167a-3p:AT1G80020.1	0.567631
AT3G62360.1	miR5632-3p	3485	4.5	0.48089	0.888087	no	NA	miR5632-3p:AT3G62360.1	0.567631
AT3G45090.2	miR5021	131	4	0.351696	0.985055	no	NA	miR5021:AT3G45090.2	0.568043
AT4G02510.1	miR5644	3748	4	0.119966	0.789059	no	ATTOC159	miR5644:ATTOC159	0.573007
AT1G30530.1	miR773b-3p	1144	4.5	1.47548	0.917531	no	UGT78D1	miR773b-3p:UGT78D1	0.579833
AT1G14650.2	miR173-5p	3009	6	0.28915	1.28915	no	NA	miR173-5p:AT1G14650.2	0.581684
AT1G10720.1	miR414	1135	5.5	0.256338	1.19507	no	NA	miR414:AT1G10720.1	0.582522
AT5G40250.1	miR172b-5p	692	4.5	0.164056	0.884669	no	NA	miR172b-5p:AT5G40250.1	0.582777
AT5G02820.1	miR8165	501	4	0.222502	0.768578	no	BIN5	miR8165:BIN5	0.583425
AT3G51880.4	miR414	542	4	0.286073	0.679722	no	AtHMGB1	miR414:AtHMGB1	0.583473
AT1G63840.1	miR156i	270	4	0.561893	0.975661	no	NA	miR156i:AT1G63840.1	0.586261
AT1G67580.2	miR8166	25	5	0.325037	0.964186	no	NA	miR8166:AT1G67580.2	0.587317
AT2G38610.2	miR1886.1	178	6	0.613161	1.19707	no	NA	miR1886.1:AT2G38610.2	0.587317
AT3G01500.3	miR5658	1200	4	3.54977	0.745475	no	ATBCA1	miR5658:ATBCA1	0.587317
AT3G05530.1	miR5641	1555	4.5	0.690062	0.885086	no	ATS6A.2	miR5641:ATS6A.2	0.587317
AT4G35080.3	miR169d	703	4.5	0.159955	0.809629	no	NA	miR169d:AT4G35080.3	0.587317
AT5G19320.1	miR414	1714	4.5	0.378355	0.838979	no	RANGAP2	miR414:RANGAP2	0.587317
AT5G19680.1	miR780.2	380	4.5	0.257364	0.815193	no	NA	miR780.2:AT5G19680.1	0.587317
AT1G60070.2	miR846-3p	1319	4.5	0.0922818	0.970837	no	NA	miR846-3p:AT1G60070.2	0.587332
AT1G22070.1	miR8170-3p	1275	5	0.306581	0.970304	no	TGA3	miR8170-3p:TGA3	0.588087
AT1G56190.2	miR164c-5p	217	4.5	0.288124	0.806714	no	NA	miR164c-5p:AT1G56190.2	0.588087
AT2G23900.1	miR845b	875	6	0.26044	1.17491	no	NA	miR845b:AT2G23900.1	0.588087
AT4G00830.4	miR414	488	4	0.271719	0.664929	no	LIF2	miR414:LIF2	0.588087
AT5G65670.2	miR172b-5p	1057	3.5	0.0820282	0.234179	no	IAA9	miR172b-5p:IAA9	0.588087
AT1G55680.1	miR5021	70	4	0.109713	1.10971	no	NA	miR5021:AT1G55680.1	0.589461
AT1G18090.2	miR1888a	1814	4	0.328113	0.777815	no	NA	miR1888a:AT1G18090.2	0.590998
AT2G30910.3	miR4221	810	5	0.0748508	0.919318	no	ARPC1	miR4221:ARPC1	0.591414
AT2G31300.1	miR4221	686	5	0.156879	0.915603	no	ARPC1	miR4221:ARPC1	0.592369
AT1G69060.1	miR396b-5p	511	5.5	0.171234	1.17123	no	NA	miR396b-5p:AT1G69060.1	0.592496
AT4G14830.1	miR5650	493	5.5	0.210197	1.2102	no	HSP1	miR5650:HSP1	0.592496
AT5G40400.1	miR158a-5p	1002	5	0.104586	1.10459	no	NA	miR158a-5p:AT5G40400.1	0.592496
AT5G58690.1	miR159b-3p	827	6	0.253262	1.25326	no	ATPLC5	miR159b-3p:ATPLC5	0.592496
AT1G12430.2	miR837-5p	2418	5	0.50755	1.07612	no	ARK3	miR837-5p:ARK3	0.595877
AT1G15340.2	miR773a	1048	5.5	0.532158	1.17357	no	MBD10	miR773a:MBD10	0.595877
AT3G14120.3	miR157a-5p	2944	4	0.375279	0.745868	no	NA	miR157a-5p:AT3G14120.3	0.596854
AT3G15480.1	miR849	733	4	0.249161	0.709423	no	NA	miR849:AT3G15480.1	0.596854
AT1G63000.1	miR396a-5p	683	4.5	0.526006	0.9174	no	NRS/ER	miR396a-5p:NRS/ER	0.59731
AT4G25640.2	miR854a	478	5	0.40604	1.18389	no	ATDTX35	miR854a:ATDTX35	0.59731
AT5G02840.3	miR5656	37	5	0.239933	1.11017	no	LCL1	miR5656:LCL1	0.59731
AT5G03650.1	miR847	344	5	0.429623	1.07477	no	SBE2.2	miR847:SBE2.2	0.59731
AT5G65020.2	miR8182	88	4.5	0.714671	0.857456	no	ANNAT2	miR8182:ANNAT2	0.59731
AT3G49260.3	miR156d-3p	946	6	0.703392	1.12837	no	iqd21	miR156d-3p:iqd21	0.597804
AT1G63670.3	miR172d-5p	2209	4.5	0.312733	0.81016	no	TRM12	miR172d-5p:TRM12	0.606307
AT4G16350.1	miR773a	476	5	0.258389	0.921187	no	CBL6	miR773a:CBL6	0.608882
AT5G54760.3	miR5998a	93	4	0.176361	0.554432	no	NA	miR5998a:AT5G54760.3	0.609063
AT1G25470.2	miR5021	175	5.5	0.264541	1.26454	no	CRF12	miR5021:CRF12	0.609456
AT1G25472.1	miR5021	181	5.5	0.264541	1.26454	no	CPuORF54	miR5021:CPuORF54	0.609456
AT1G52380.1	miR156i	45	4	0.217375	0.811937	no	NA	miR156i:AT1G52380.1	0.609562
AT3G09000.1	miR5021	108	4	0.125093	0.935224	no	NA	miR5021:AT3G09000.1	0.61113
AT5G24690.1	miR414	701	4	0.111763	0.62269	no	NA	miR414:AT5G24690.1	0.613153
AT5G14120.1	miR861-5p	1610	5.5	0.190716	1.19072	no	NA	miR861-5p:AT5G14120.1	0.613738
AT1G68300.1	miR2939	621	6	1.39345	1.09268	no	NA	miR2939:AT1G68300.1	0.615159
AT5G20350.1	miR156i	1602	4.5	0.18764	0.910397	no	TIP1	miR156i:TIP1	0.618085
AT1G30890.2	miR417	762	4.5	0.104586	0.906587	no	NA	miR417:AT1G30890.2	0.619135
AT1G70780.1	miR172d-5p	414	4	1.32681	0.722408	no	NA	miR172d-5p:AT1G70780.1	0.624183
AT1G70782.1	miR172d-5p	414	4	1.32681	0.722408	no	CPuORF28	miR172d-5p:CPuORF28	0.624183
AT2G17265.1	miR845a	548	6	1.28067	1.21394	no	DMR1	miR845a:DMR1	0.62437
AT2G19480.3	miR414	1181	4	0.168158	0.681272	no	NAP1;2	miR414:NAP1;2	0.62437
AT3G11250.1	miR5662	764	4	0.276845	0.743325	no	NA	miR5662:AT3G11250.1	0.62437
AT1G80280.1	miR856	316	6	0.48089	1.11935	no	NA	miR856:AT1G80280.1	0.627037
AT3G60380.1	miR843	898	6	0.290175	1.08353	no	NA	miR843:AT3G60380.1	0.627037
AT4G26400.2	miR414	518	4.5	0.0902311	0.79809	no	NA	miR414:AT4G26400.2	0.627423
AT5G49470.4	miR841a-5p	2355	5.5	0.386558	1.02891	no	NA	miR841a-5p:AT5G49470.4	0.628448
AT1G18090.2	miR863-5p	1714	6	0.661353	1.09606	no	NA	miR863-5p:AT1G18090.2	0.628905
AT1G21590.1	miR5635a	2371	5.5	0.171234	1.03629	no	NA	miR5635a:AT1G21590.1	0.628905
AT3G07760.2	miR172d-5p	266	4.5	0.052293	0.790491	no	NA	miR172d-5p:AT3G07760.2	0.628905
AT4G36648.1	miR414	289	4	0.229679	0.670257	no	NA	miR414:AT4G36648.1	0.631635
AT4G25770.2	miR868-3p	1416	4.5	0.069724	0.877974	no	NA	miR868-3p:AT4G25770.2	0.635622
AT3G02870.3	miR830-3p	928	5.5	0.724924	1.16802	no	VTC4	miR830-3p:VTC4	0.645164
AT3G29290.1	miR447a.2-3p	972	4.5	0.250186	0.820356	no	emb2076	miR447a.2-3p:emb2076	0.647275
AT1G14000.1	miR5012	805	4.5	0.427572	0.851401	no	VIK	miR5012:VIK	0.647468
AT5G57460.1	miR5021	348	4	0.0953578	0.898257	no	NA	miR5021:AT5G57460.1	0.652968
AT3G03960.1	miR159b-5p	281	4.5	0.402964	0.819682	no	NA	miR159b-5p:AT3G03960.1	0.654924
AT4G29905.1	miR5021	78	3.5	0.255313	0.883777	no	NA	miR5021:AT4G29905.1	0.654924
AT1G30090.1	miR838	219	5.5	0.0943325	1	no	NA	miR838:AT1G30090.1	0.65676
AT3G55250.1	miR863-3p	609	5	0.415268	0.931187	no	PDE329	miR863-3p:PDE329	0.657397
AT2G35110.2	miR861-3p	3346	4.5	0.0820282	0.780947	no	GRL	miR861-3p:GRL	0.660378
AT1G47740.2	miR5641	1192	5	0.439876	1.10288	no	NA	miR5641:AT1G47740.2	0.666195
AT1G74560.3	miR414	863	5	0.28915	1.02195	no	NRP1	miR414:NRP1	0.666195
AT3G29360.2	miR172d-5p	226	5	0.46551	1.03325	no	UGD2	miR172d-5p:UGD2	0.666195
AT5G46030.1	miR838	405	4	0.0963832	0.501706	no	NA	miR838:AT5G46030.1	0.666195
AT5G57370.1	miR414	572	4.5	0.390659	0.764841	no	NA	miR414:AT5G57370.1	0.667036
AT3G07740.4	miR870-3p	1194	4.5	0.110738	0.750048	no	ADA2A	miR870-3p:ADA2A	0.671563
AT5G01400.1	miR780.1	1255	6	0.0717747	1.07177	no	ESP4	miR780.1:ESP4	0.671563
AT4G37820.1	miR837-5p	1643	5.5	0.240958	1.11518	no	NA	miR837-5p:AT4G37820.1	0.673616
AT5G19670.1	miR5631	188	5.5	0.159955	1.15996	no	NA	miR5631:AT5G19670.1	0.673616
AT5G45960.1	miR2934-5p	706	6	1.17095	1.20968	no	NA	miR2934-5p:AT5G45960.1	0.675531
AT4G33300.2	miR160c-3p	1806	5	0.34862	1.02096	no	ADR1-L1	miR160c-3p:ADR1-L1	0.676457
AT1G62480.1	miR838	428	4	0.159955	0.403411	no	NA	miR838:AT1G62480.1	0.680983
AT3G47500.1	miR4239	213	4.5	0.177386	0.728474	no	CDF3	miR4239:CDF3	0.681308
AT5G13220.4	miR841a-5p	464	4	0.162006	0.623269	no	JAS1	miR841a-5p:JAS1	0.684507
AT1G67230.1	miR399f	3651	4.5	0.237882	0.708796	no	CRWN1	miR399f:CRWN1	0.690351
AT2G22980.4	miR846-5p	1289	5.5	0.311707	0.978581	no	SCPL13	miR846-5p:SCPL13	0.690351
AT4G26230.1	miR414	332	5	1.29707	0.879824	no	NA	miR414:AT4G26230.1	0.690351
AT5G26000.2	miR4227	851	4	0.477814	0.541165	no	AtTGG1	miR4227:AtTGG1	0.690351
AT1G07320.4	miR414	870	4	0.0738254	0.445406	no	EMB2784	miR414:EMB2784	0.694559
AT1G27510.1	miR838	1128	6	0.375279	1.05673	no	EX2	miR838:EX2	0.694559
AT5G26600.2	miR5021	30	5	0.109713	1.01691	no	NA	miR5021:AT5G26600.2	0.694559
AT3G24506.1	miR837-5p	440	5	0.0984339	0.85478	no	NA	miR837-5p:AT3G24506.1	0.703052
AT1G09340.1	miR399d	408	5.5	0.817206	1.09112	no	CRB	miR399d:CRB	0.705126
AT1G51730.1	miR835-5p	965	4.5	0.177386	0.790129	no	NA	miR835-5p:AT1G51730.1	0.705126
AT1G45130.1	miR5643a	769	5	0.358874	0.862094	no	AtBGAL5	miR5643a:AtBGAL5	0.705417
AT1G14670.1	miR5658	1537	4	0.220451	0.564574	no	NA	miR5658:AT1G14670.1	0.706262
AT2G17390.1	miR167d	363	4.5	0.185589	0.578635	no	AKR2B	miR167d:AKR2B	0.706262
AT3G03940.1	miR413	1223	6	0.749533	1.04342	no	NA	miR413:AT3G03940.1	0.706262
AT3G17160.1	miR414	344	5	0.721848	0.867271	no	NA	miR414:AT3G17160.1	0.706262
AT5G16340.1	miR2936	212	5	0.0963832	0.916044	no	NA	miR2936:AT5G16340.1	0.706262
AT5G16370.1	miR2936	242	5	0.0963832	0.916044	no	AAE5	miR2936:AAE5	0.706262
AT5G63880.2	miR868-3p	348	6	0.339392	1.07135	no	VPS20.1	miR868-3p:VPS20.1	0.706262
AT3G55800.1	miR854a	344	4.5	0.355797	0.956593	no	SBPASE	miR854a:SBPASE	0.70737
AT2G46890.1	miR159a	150	5.5	0.0984339	1.09843	no	NA	miR159a:AT2G46890.1	0.70917
AT3G17170.1	miR414	807	4.5	0.190716	0.814202	no	RFC3	miR414:RFC3	0.70917
AT3G15840.5	miR4239	802	6	0.98844	1.04247	no	PIFI	miR4239:PIFI	0.711269
AT5G18620.2	miR172d-5p	250	6	0.236857	1.05511	no	CHR17	miR172d-5p:CHR17	0.711269
AT1G48750.1	miR5658	469	4	0.489093	0.633551	no	NA	miR5658:AT1G48750.1	0.71149
AT1G63150.1	miR161.1	987	4	0.186614	0.160126	yes	NA	miR161.1:AT1G63150.1	0.71149
AT1G64690.1	miR157a-3p	386	6	0.168158	1.16816	no	BLT	miR157a-3p:BLT	0.71149
AT5G18310.2	miR5021	246	4	0.1456	0.984145	no	NA	miR5021:AT5G18310.2	0.71149
AT5G27850.1	miR396b-5p	541	5	1.30015	0.956101	no	NA	miR396b-5p:AT5G27850.1	0.71149
AT5G44660.1	miR5998a	1339	4.5	0.364	0.773292	no	NA	miR5998a:AT5G44660.1	0.71149
AT5G55850.3	miR396b-3p	208	4.5	0.182513	0.897997	no	NOI	miR396b-3p:NOI	0.71149
AT5G57685.1	miR4239	490	6	0.792598	1.17549	no	ATGDU3	miR4239:ATGDU3	0.71149
AT5G26230.1	miR5636	371	5.5	0.432699	0.973524	no	MAKR1	miR5636:MAKR1	0.713787
AT5G41700.5	miR5658	966	4	0.28915	0.618959	no	ATUBC8	miR5658:ATUBC8	0.714197
AT3G53610.3	miR172c	589	4.5	0.447054	0.715195	no	ATRAB8	miR172c:ATRAB8	0.714244
AT5G40490.1	miR4227	1194	5	0.0851043	0.954885	no	NA	miR4227:AT5G40490.1	0.714689
AT1G08560.1	miR5650	755	5	0.245059	0.972762	no	ATSYP111	miR5650:ATSYP111	0.714803
AT4G17640.2	miR5640	1227	4.5	0.00820282	0.83806	no	CKB2	miR5640:CKB2	0.714803
AT4G32260.1	miR5021	895	3	0.238907	0.30892	no	PDE334	miR5021:PDE334	0.714803
AT5G12010.1	miR169g-3p	1088	6	0.142524	1.14252	no	NA	miR169g-3p:AT5G12010.1	0.714803
AT5G61440.1	miR396b-5p	718	5	0.53626	0.842071	no	ACHT5	miR396b-5p:ACHT5	0.71498
AT3G61530.2	miR844-5p	457	6	0.183538	1.18354	no	PANB2	miR844-5p:PANB2	0.716259
AT1G23390.1	miR775	540	4.5	0.105611	0.699599	no	NA	miR775:AT1G23390.1	0.718151
AT3G12860.1	miR838	1575	5	0.117916	0.848942	no	NA	miR838:AT3G12860.1	0.718151
AT3G20390.1	miR5021	47	5	0.502423	0.99457	no	NA	miR5021:AT3G20390.1	0.718151
AT5G49100.1	miR5021	1308	4	0.415268	0.834873	no	NA	miR5021:AT5G49100.1	0.718151
AT5G04600.1	miR5021	125	4	0.279921	0.833698	no	NA	miR5021:AT5G04600.1	0.718846
AT4G09040.2	miR5021	32	3.5	0.108687	0.672319	no	NA	miR5021:AT4G09040.2	0.719
AT5G18620.2	miR838	2614	5	0.244034	0.842391	no	CHR17	miR838:CHR17	0.720932
AT5G55400.1	miR829-5p	1615	5.5	0.16098	0.974188	no	NA	miR829-5p:AT5G55400.1	0.72286
AT2G32810.2	miR852	1777	4.5	0.0984339	0.750574	no	BGAL9	miR852:BGAL9	0.723542
AT2G29560.1	miR838	63	6	0.0410141	1.02836	no	ENOC	miR838:ENOC	0.725967
AT5G57000.2	miR5658	361	5	0.172259	0.89579	no	NA	miR5658:AT5G57000.2	0.725967
AT5G60920.1	miR5021	1552	4.5	0.201995	0.898795	no	COB	miR5021:COB	0.725967
AT1G54370.1	miR414	1553	5.5	0.0758761	1.07588	no	ATNHX5	miR414:ATNHX5	0.726825
AT3G20050.1	miR5645a	1735	4.5	0.320935	0.712827	no	ATTCP-1	miR5645a:ATTCP-1	0.727771
AT5G49550.1	miR830-5p	143	5	0.722874	0.835426	no	BLOS2	miR830-5p:BLOS2	0.727771
AT1G60890.2	miR861-5p	597	6	0.273769	1.03155	no	NA	miR861-5p:AT1G60890.2	0.729072
AT5G42950.1	miR4239	4315	6	0.385533	1.14975	no	NA	miR4239:AT5G42950.1	0.733512
AT5G45940.2	miR1886.3	538	5.5	0.60906	0.979405	no	AtNUDT11	miR1886.3:AtNUDT11	0.735423
AT3G61250.1	miR858b	603	5	0.0205071	0.802463	no	AtMYB17	miR858b:AtMYB17	0.746907
AT5G66950.1	miR414	2461	5.5	0.0830536	1.05916	no	NA	miR414:AT5G66950.1	0.751439
AT1G02880.4	miR5021	31	4	0.107662	0.802418	no	TPK1	miR5021:TPK1	0.757636
AT4G39520.1	miR869.2	106	5.5	0.197893	1.07549	no	NA	miR869.2:AT4G39520.1	0.757893
AT3G09560.3	miR825	2590	5	0.243009	0.928751	no	ATPAH1	miR825:ATPAH1	0.758381
AT5G07530.2	miR164b-3p	1497	5	4.48489	0.82331	no	ATGRP-7	miR164b-3p:ATGRP-7	0.75883
AT5G51340.1	miR5636	1035	5.5	0.11484	0.933865	no	NA	miR5636:AT5G51340.1	0.75883
AT5G22650.2	miR414	587	4.5	2.74589	0.658926	no	ATHD2	miR414:ATHD2	0.765562
AT1G62750.1	miR842	2095	5	0.339392	0.922331	no	ATSCO1	miR842:ATSCO1	0.766829
AT4G21990.2	miR414	1442	5.5	0.495245	0.921632	no	2018-04-03	miR414:APR3	0.767097
AT4G32330.3	miR837-5p	833	5	0.106637	0.798118	no	NA	miR837-5p:AT4G32330.3	0.767097
AT1G09530.2	miR838	1205	6	0.10151	1.00468	no	PAP3	miR838:PAP3	0.76877
AT3G20800.1	miR832-5p	179	6	0.31991	1.00156	no	NA	miR832-5p:AT3G20800.1	0.771489
AT1G56020.1	miR5021	1162	5	0.0994592	1.09946	no	NA	miR5021:AT1G56020.1	0.773815
AT1G64625.3	miR408-5p	1106	6	0.108687	1.10869	no	NA	miR408-5p:AT1G64625.3	0.776738
AT1G68320.1	miR5021	519	5	0.0974085	1.09741	no	AtMYB62	miR5021:AtMYB62	0.776738
AT3G22070.1	miR5021	200	4	0.00410141	0.903995	no	NA	miR5021:AT3G22070.1	0.777894
AT3G23910.1	miR5643a	450	5.5	0.2912	1.04049	no	NA	miR5643a:AT3G23910.1	0.777894
AT3G53460.4	miR403-5p	1385	5	1.61185	0.849296	no	CP29	miR403-5p:CP29	0.777894
AT3G54820.1	miR5020c	648	5	0.255313	0.942276	no	PIP2;5	miR5020c:PIP2;5	0.777894
AT3G52890.2	miR390a-5p	2954	5.5	0.217375	1.02415	no	KIPK	miR390a-5p:KIPK	0.778025
AT2G22000.1	miR838	128	6	0.117916	1.11792	no	PROPEP6	miR838:PROPEP6	0.779251
AT1G04590.2	miR5998a	1209	5.5	0.775167	0.930656	no	NA	miR5998a:AT1G04590.2	0.783926
AT1G77840.1	miR5663-5p	425	5	0.223527	0.803944	no	NA	miR5663-5p:AT1G77840.1	0.784851
AT4G14030.2	miR393b-3p	471	4.5	0.278896	0.623241	no	SBP1	miR393b-3p:SBP1	0.784851
AT4G24090.1	miR2112-5p	860	6	0.574198	1.09018	no	NA	miR2112-5p:AT4G24090.1	0.786324
AT1G07110.1	miR167c-5p	2066	5	0.286073	0.887495	no	ATF2KP	miR167c-5p:ATF2KP	0.78678
AT4G20930.1	miR868-3p	747	5	0.0881803	0.896896	no	NA	miR868-3p:AT4G20930.1	0.78678
AT4G31160.1	miR414	5640	6	0.447054	1.11451	no	DCAF1	miR414:DCAF1	0.787344
AT1G65370.1	miR5655	1157	4	0.537285	0.568493	no	NA	miR5655:AT1G65370.1	0.787545
AT2G33810.1	miR5021	287	4	1.78309	0.773237	no	SPL3	miR5021:SPL3	0.787545
AT3G29075.1	miR414	714	4.5	0.389634	0.62911	no	NA	miR414:AT3G29075.1	0.787545
AT3G45780.2	miR5012	2727	6	0.338366	0.99089	no	JK224	miR5012:JK224	0.787545
AT1G33810.1	miR774b-5p	377	5.5	0.31991	0.938059	no	NA	miR774b-5p:AT1G33810.1	0.792649
AT1G24560.1	miR3434-5p	1996	5	0.0820282	0.897133	no	NA	miR3434-5p:AT1G24560.1	0.796194
AT4G32020.1	miR5021	87	4	0.212248	0.876879	no	NA	miR5021:AT4G32020.1	0.798738
AT2G19080.1	miR414	1002	5	0.345544	0.801499	no	NA	miR414:AT2G19080.1	0.800009
AT2G27170.2	miR414	3344	4.5	0.109713	0.605884	no	SMC3	miR414:SMC3	0.800009
AT3G29075.1	miR414	867	4.5	0.0235831	0.601996	no	NA	miR414:AT3G29075.1	0.800009
AT3G47390.2	miR5021	85	5	0.0974085	0.928837	no	PHS1	miR5021:PHS1	0.800009
AT4G26582.1	miR780.1	342	5.5	0.390659	0.879969	no	NA	miR780.1:AT4G26582.1	0.800009
AT5G11860.4	miR5643a	929	4.5	0.552665	0.601314	no	SSP5	miR5643a:SSP5	0.800009
AT4G05330.1	miR829-5p	1047	5.5	0.457307	1.02747	no	AGD13	miR829-5p:AGD13	0.800165
AT2G23950.1	miR5012	1414	6	0.0922818	0.980668	no	NA	miR5012:AT2G23950.1	0.80029
AT3G21400.1	miR863-5p	559	5	0.0922818	0.77685	no	NA	miR863-5p:AT3G21400.1	0.80029
AT1G15860.3	miR829-5p	851	5	0.226603	0.886606	no	NA	miR829-5p:AT1G15860.3	0.801915
AT1G18580.1	miR5021	124	6	0.107662	1.02175	no	GAUT11	miR5021:GAUT11	0.811136
AT5G61410.2	miR3434-3p	568	5.5	0.550614	1.01272	no	EMB2728	miR3434-3p:EMB2728	0.812365
AT5G23940.1	miR3440b-3p	713	4.5	0.446029	0.530522	no	DCR	miR3440b-3p:DCR	0.812537
AT2G04350.2	miR845a	2168	5.5	0.563944	1.0086	no	LACS8	miR845a:LACS8	0.814303
AT3G51160.1	miR839-5p	782	6	0.499347	1.10088	no	GMD2	miR839-5p:GMD2	0.814303
AT3G55760.3	miR8183	548	5.5	0.183538	0.882287	no	NA	miR8183:AT3G55760.3	0.816528
AT1G44575.2	miR5998a	38	6	0.477814	1.1391	no	CP22	miR5998a:CP22	0.817217
AT5G40830.2	miR778	694	5	0.103561	0.816427	no	NA	miR778:AT5G40830.2	0.817217
AT1G76030.1	miR865-3p	1462	5.5	0.552665	0.892706	no	AtVAB1	miR865-3p:AtVAB1	0.817598
AT3G27470.2	miR5997	545	6	0.350671	0.978459	no	NA	miR5997:AT3G27470.2	0.817598
AT5G58130.1	miR414	1430	5.5	0.175335	1.00262	no	ROS3	miR414:ROS3	0.81927
AT3G02520.1	miR868-3p	1078	5	0.358874	0.850476	no	GF14 NU	miR868-3p:GF14 NU	0.824989
AT3G50920.2	miR5628	577	6	0.105611	1.10561	no	LPPepsilon1	miR5628:LPPepsilon1	0.824989
AT5G26660.1	miR858b	429	5.5	0.321961	0.97137	no	ATMYB86	miR858b:ATMYB86	0.824989
AT1G05180.3	miR859	1727	4.5	0.686986	0.557668	no	AXR1	miR859:AXR1	0.827208
AT1G03770.3	miR865-3p	692	5.5	0.249161	0.883913	no	ATRING1B	miR865-3p:ATRING1B	0.828792
AT2G16890.2	miR773a	1241	6	0.30453	0.949264	no	NA	miR773a:AT2G16890.2	0.828792
AT2G29960.2	miR5632-5p	378	5	0.359899	0.749191	no	ATCYP5	miR5632-5p:ATCYP5	0.828792
AT3G07700.3	miR391-3p	1845	5.5	0.463459	0.862258	no	NA	miR391-3p:AT3G07700.3	0.828792
AT3G16640.1	miR414	276	4.5	2.59414	0.543177	no	TCTP	miR414:TCTP	0.828792
AT4G08810.1	miR5658	326	5	0.128169	0.807674	no	SUB1	miR5658:SUB1	0.828792
AT4G14147.2	miR840-3p	600	6	0.281972	0.971257	no	ARPC4	miR840-3p:ARPC4	0.828792
AT4G14410.2	miR1886.3	332	5	0.120992	0.785808	no	bHLH104	miR1886.3:bHLH104	0.828792
AT4G14500.2	miR5021	64	5	0.636744	0.907864	no	NA	miR5021:AT4G14500.2	0.828792
AT5G45670.1	miR167a-3p	1107	5	1.27656	0.778149	no	NA	miR167a-3p:AT5G45670.1	0.830338
AT5G50840.2	miR782	1038	5.5	0.415268	0.876212	no	NA	miR782:AT5G50840.2	0.830338
AT5G60160.1	miR5020b	161	5	0.33324	0.811518	no	NA	miR5020b:AT5G60160.1	0.830338
AT3G61640.1	miR1886.1	70	5	0.343493	0.920605	no	AGP20	miR1886.1:AGP20	0.832096
AT1G53070.1	miR833a-5p	666	5	0.836688	0.723083	no	NA	miR833a-5p:AT1G53070.1	0.835457
AT4G01590.3	miR413	750	5	0.125093	0.82361	no	NA	miR413:AT4G01590.3	0.83948
AT1G16890.3	miR5998a	491	5.5	1.23247	0.886411	no	UBC13B	miR5998a:UBC13B	0.839982
AT3G08620.1	miR1888b	427	5	0.0994592	0.752328	no	NA	miR1888b:AT3G08620.1	0.842093
AT2G36250.2	miR5645c	2094	4.5	0.111763	0.602952	no	ATFTSZ2-1	miR5645c:ATFTSZ2-1	0.845305
AT5G24930.1	miR847	1463	4.5	0.194817	0.442518	no	ATCOL4	miR847:ATCOL4	0.849028
AT2G04280.1	miR1886.2	357	5	0.110738	0.867123	no	NA	miR1886.2:AT2G04280.1	0.85074
AT1G01620.2	miR157c-3p	320	5.5	1.21812	0.834507	no	PIP1;3	miR157c-3p:PIP1;3	0.852075
AT3G15790.1	miR156i	881	4.5	0.276845	0.690563	no	ATMBD11	miR156i:ATMBD11	0.852192
AT5G60790.1	miR157a-3p	602	5	0.250186	0.719644	no	ABCF1	miR157a-3p:ABCF1	0.852192
AT2G17450.1	miR5658	612	5.5	0.454231	1.02161	no	RHA3A	miR5658:RHA3A	0.85491
AT5G14320.2	miR5021	78	4	0.227628	0.698414	no	EMB3137	miR5021:EMB3137	0.85551
AT2G10410.1	miR846-5p	545	5.5	0.398862	0.847231	no	SADHU1-1	miR846-5p:SADHU1-1	0.855801
AT5G27950.1	miR781a	2119	5.5	0.53831	0.853265	no	NA	miR781a:AT5G27950.1	0.855801
AT5G53530.1	miR773b-3p	671	5	0.0861296	0.795684	no	VPS26A	miR773b-3p:VPS26A	0.85668
AT2G22300.2	miR168b-3p	2990	5.5	0.33324	0.97306	no	CAMTA3	miR168b-3p:CAMTA3	0.857232
AT2G26450.1	miR837-5p	1796	5.5	0.322986	0.852074	no	NA	miR837-5p:AT2G26450.1	0.85786
AT1G35310.1	miR414	288	4.5	3.08221	0.458922	no	MLP168	miR414:MLP168	0.859013
AT2G16640.1	miR4243	3245	6	0.435775	0.947236	no	ATTOC132	miR4243:ATTOC132	0.859013
AT3G27160.1	miR5021	31	4	0.272744	0.691027	no	GHS1	miR5021:GHS1	0.859013
AT4G02450.2	miR414	735	4.5	0.109713	0.474208	no	NA	miR414:AT4G02450.2	0.859013
AT4G32250.3	miR396a-5p	1759	5	0.273769	0.717549	no	NA	miR396a-5p:AT4G32250.3	0.859013
AT5G10560.1	miR8172	2439	4.5	0.100485	0.476741	no	NA	miR8172:AT5G10560.1	0.859013
AT5G01350.1	miR156j	459	4.5	0.587527	0.754051	no	NA	miR156j:AT5G01350.1	0.860549
AT1G10630.1	miR2111a-5p	455	4.5	0.431674	0.426048	no	ARFA1F	miR2111a-5p:ARFA1F	0.865298
AT4G35920.3	miR868-3p	820	5	0.389634	0.721169	no	MCA1	miR868-3p:MCA1	0.867714
AT3G28050.1	miR5998a	83	5	0.169183	0.725238	no	UMAMIT41	miR5998a:UMAMIT41	0.868835
AT1G20910.1	miR831-3p	866	5	0.0963832	0.679649	no	NA	miR831-3p:AT1G20910.1	0.870191
AT1G22910.3	miR5020a	1205	5	0.347595	0.758699	no	NA	miR5020a:AT1G22910.3	0.870191
AT1G55330.1	miR414	96	4.5	0.221476	0.398382	no	AGP21	miR414:AGP21	0.870191
AT2G43750.2	miR854a	243	4.5	0.15893	0.623677	no	ACS1	miR854a:ACS1	0.870191
AT3G01820.1	miR167c-5p	834	5	0.0820282	0.720189	no	NA	miR167c-5p:AT3G01820.1	0.870191
AT3G04730.1	miR391-3p	784	4.5	0.365026	0.351698	no	IAA16	miR391-3p:IAA16	0.870191
AT3G44750.2	miR414	472	4.5	0.873601	0.386457	no	ATHD2A	miR414:ATHD2A	0.870191
AT4G00893.1	miR5021	1368	6	0.127144	0.96489	no	NA	miR5021:AT4G00893.1	0.870191
AT4G05020.2	miR2111b-3p	2181	5.5	0.214299	0.809885	no	NDB2	miR2111b-3p:NDB2	0.870191
AT5G66510.2	miR838	96	6	0.707493	0.92914	no	GAMMA CA3	miR838:GAMMA CA3	0.870191
AT1G78150.3	miR5021	42	5	0.100485	1.00374	no	NA	miR5021:AT1G78150.3	0.870767
AT2G15430.1	miR1886.1	314	5.5	0.222502	1.01533	no	NRPB3	miR1886.1:NRPB3	0.870767
AT3G16840.1	miR172b-5p	796	5.5	0.15893	0.95119	no	NA	miR172b-5p:AT3G16840.1	0.870767
AT3G50060.1	miR414	817	6	0.618288	1.0619	no	MYB77	miR414:MYB77	0.870767
AT3G58580.1	miR8169	2416	5	0.193792	0.869982	no	NA	miR8169:AT3G58580.1	0.870767
AT4G19170.1	miR5021	68	6	0.107662	1.10766	no	CCD4	miR5021:CCD4	0.870767
AT4G19700.1	miR5650	415	6	0.374254	1.07456	no	AtILP	miR5650:AtILP	0.870767
AT4G20960.1	miR865-3p	1203	5.5	0.0830536	0.939516	no	PyrD	miR865-3p:PyrD	0.870767
AT5G62690.1	miR774a	179	5	0.123042	0.782185	no	TUB2	miR774a:TUB2	0.870767
AT1G29930.1	miR842	223	4.5	0.95768	0.303528	no	AB140	miR842:AB140	0.871048
AT3G01720.1	miR858b	2000	5.5	0.170209	0.817371	no	NA	miR858b:AT3G01720.1	0.87198
AT2G17120.1	miR156a-5p	809	5	0.405014	0.772736	no	CL-1	miR156a-5p:CL-1	0.873714
AT2G34250.2	miR159b-5p	470	5.5	0.608034	0.80372	no	NA	miR159b-5p:AT2G34250.2	0.875195
AT3G10050.1	miR865-3p	1093	4.5	0.0943325	0.386656	no	OMR1	miR865-3p:OMR1	0.875195
AT5G57370.1	miR845a	647	5.5	0.381431	0.830485	no	NA	miR845a:AT5G57370.1	0.875412
AT1G07920.1	miR414	1280	4.5	0.167133	0.290504	no	NA	miR414:AT1G07920.1	0.877576
AT1G07930.2	miR414	1061	4.5	0.156879	0.299812	no	NA	miR414:AT1G07930.2	0.877576
AT1G07940.2	miR414	1411	4.5	0.419369	0.207684	no	NA	miR414:AT1G07940.2	0.878358
AT2G29700.1	miR831-3p	205	6	0.184564	0.900958	no	ATPH1	miR831-3p:ATPH1	0.878358
AT3G18680.1	miR5638a	1094	6	0.855144	0.915036	no	NA	miR5638a:AT3G18680.1	0.878358
AT3G58730.1	miR861-3p	884	4.5	0.0861296	0.323119	no	NA	miR861-3p:AT3G58730.1	0.878358
AT4G01330.2	miR835-5p	1823	5.5	0.169183	0.829728	no	NA	miR835-5p:AT4G01330.2	0.878358
AT4G23400.1	miR157c-3p	37	5.5	0.328113	0.803882	no	PIP1;5	miR157c-3p:PIP1;5	0.878358
AT5G51910.2	miR413	523	6	0.529082	0.899835	no	NA	miR413:AT5G51910.2	0.878358
AT5G52882.1	miR824-5p	765	5.5	0.338366	0.844688	no	NA	miR824-5p:AT5G52882.1	0.878358
AT1G53460.1	miR835-5p	503	5.5	0.293251	0.823138	no	NA	miR835-5p:AT1G53460.1	0.880799
AT2G03220.1	miR774b-5p	852	5	0.105611	0.728429	no	ATFT1	miR774b-5p:ATFT1	0.880799
AT3G01540.4	miR781a	466	6	0.618288	0.926068	no	ATDRH1	miR781a:ATDRH1	0.880799
AT1G03210.1	miR414	361	5.5	0.0963832	0.821713	no	NA	miR414:AT1G03210.1	0.882964
AT2G46640.3	miR847	215	6	0.2912	0.892928	no	NA	miR847:AT2G46640.3	0.882964
AT3G21810.1	miR167c-5p	632	5.5	0.207121	0.81288	no	NA	miR167c-5p:AT3G21810.1	0.882964
AT5G58710.1	miR8172	706	5	0.379381	0.698744	no	ROC7	miR8172:ROC7	0.882964
AT1G43770.2	miR169a-3p	333	5.5	0.0974085	0.803344	no	NA	miR169a-3p:AT1G43770.2	0.883114
AT5G22000.3	miR2937	305	5.5	0.243009	0.835317	no	RHF2A	miR2937:RHF2A	0.883114
AT1G70190.2	miR165a-5p	96	5	0.253262	0.665627	no	NA	miR165a-5p:AT1G70190.2	0.883622
AT1G62870.1	miR5658	689	5	0.00307606	0.835936	no	NA	miR5658:AT1G62870.1	0.884134
AT5G18670.1	miR8170-5p	799	5	0.397837	0.84661	no	BAM9	miR8170-5p:BAM9	0.885018
AT1G02840.3	miR864-5p	1081	5	0.641871	0.686573	no	At-SR34	miR864-5p:At-SR34	0.891648
AT2G22720.3	miR414	280	5	0.0338366	0.683912	no	NA	miR414:AT2G22720.3	0.891648
AT3G13490.1	miR414	1656	5	0.125093	0.683117	no	ATKRS-2	miR414:ATKRS-2	0.891648
AT1G07430.1	miR838	558	6	0.269668	1.03424	no	AIP1	miR838:AIP1	0.891785
AT2G27470.1	miR156f-3p	840	5.5	0.490119	0.788848	no	NF-YB11	miR156f-3p:NF-YB11	0.891995
AT3G56480.1	miR5021	233	6	0.127144	0.930583	no	NA	miR5021:AT3G56480.1	0.891995
AT1G54460.1	miR863-5p	315	5.5	0.192766	0.796068	no	NA	miR863-5p:AT1G54460.1	0.896594
AT2G06050.3	miR5646	286	6	0.397837	0.882793	no	AtOPR3	miR5646:AtOPR3	0.896594
AT4G25010.1	miR5641	1129	6	0.407065	1.06603	no	AtSWEET14	miR5641:AtSWEET14	0.90481
AT5G42270.1	miR390b-3p	1256	5	0.365026	0.776582	no	FTSH5	miR390b-3p:FTSH5	0.90481
AT1G15000.1	miR5661	869	5.5	0.169183	0.81724	no	scpl50	miR5661:scpl50	0.908974
AT1G27930.1	miR5657	563	5.5	0.108687	0.823969	no	NA	miR5657:AT1G27930.1	0.908974
AT1G53290.1	miR156g	966	5	0.216349	0.713216	no	NA	miR156g:AT1G53290.1	0.909201
AT1G68410.2	miR5021	192	5	0.405014	0.809245	no	NA	miR5021:AT1G68410.2	0.909201
AT3G62700.1	miR870-3p	2312	5.5	0.0943325	0.815788	no	ABCC14	miR870-3p:ABCC14	0.909201
AT1G58290.1	miR2934-3p	253	5.5	0.329138	0.807006	no	AtHEMA1	miR2934-3p:AtHEMA1	0.910902
AT1G68320.1	miR858a	321	6	0.00307606	0.877161	no	AtMYB62	miR858a:AtMYB62	0.910902
AT3G04670.2	miR396a-5p	1635	5.5	0.264541	0.771146	no	ATWRKY39	miR396a-5p:ATWRKY39	0.910902
AT3G04790.1	miR1886.1	13	5.5	0.0943325	0.82781	no	EMB3119	miR1886.1:EMB3119	0.910902
AT3G18790.1	miR5650	335	5.5	0.584451	0.812757	no	NA	miR5650:AT3G18790.1	0.910902
AT3G20870.1	miR5998a	1013	5.5	0.431674	0.804178	no	ZTP29	miR5998a:ZTP29	0.910902
AT3G27850.1	miR5020c	191	5	0.306581	0.685361	no	RPL12-C	miR5020c:RPL12-C	0.910902
AT3G49470.1	miR414	244	5	0.0943325	0.661968	no	NACA2	miR414:NACA2	0.910902
AT4G17090.1	miR5645a	1469	5	0.306581	0.66359	no	AtBAM3	miR5645a:AtBAM3	0.910902
AT4G29030.1	miR841b-5p	609	6	0.544462	0.858142	no	NA	miR841b-5p:AT4G29030.1	0.910902
AT4G37510.1	miR2111a-5p	1033	5.5	0.707493	0.80205	no	NA	miR2111a-5p:AT4G37510.1	0.910902
AT5G64170.2	miR860	1488	5.5	0.205071	0.802085	no	NA	miR860:AT5G64170.2	0.910902
AT3G11120.1	miR831-3p	105	5	4.01426	0.715134	no	NA	miR831-3p:AT3G11120.1	0.913086
AT1G22640.1	miR858a	394	5	0.556767	0.61787	no	ATMYB3	miR858a:ATMYB3	0.914481
AT1G11130.1	miR419	2413	6	0.555741	0.886634	no	SCM	miR419:SCM	0.914614
AT4G32590.4	miR396a-5p	429	5	0.252237	0.632367	no	NA	miR396a-5p:AT4G32590.4	0.914755
AT1G51630.1	miR393b-3p	330	5.5	0.0851043	0.90662	no	AtMSR2	miR393b-3p:AtMSR2	0.917017
AT3G21465.2	miR773b-3p	764	6	0.105611	0.997226	no	NA	miR773b-3p:AT3G21465.2	0.917017
AT2G20480.1	miR5998a	72	6	0.2912	0.898664	no	NA	miR5998a:AT2G20480.1	0.918548
AT1G16490.1	miR858a	457	6	0.0933071	0.865289	no	ATMYB58	miR858a:ATMYB58	0.919927
AT1G20190.1	miR5640	924	5	0.111763	0.661435	no	ATEXP11	miR5640:ATEXP11	0.919927
AT1G80920.1	miR8176	122	5.5	0.0840789	0.72952	no	AtJ8	miR8176:AtJ8	0.919927
AT2G36190.1	miR5998a	1784	5.5	0.172259	0.791591	no	AtCWIN4	miR5998a:AtCWIN4	0.919927
AT2G36570.1	miR391-3p	1650	5	0.125093	0.631243	no	NA	miR391-3p:AT2G36570.1	0.919927
AT2G47110.2	miR5024-3p	149	6	0.481916	0.856574	no	UBI6	miR5024-3p:UBI6	0.919927
AT2G47920.1	miR837-5p	560	5.5	0.411167	0.771336	no	NET3C	miR837-5p:NET3C	0.919927
AT5G37850.3	miR865-3p	550	6	0.303504	0.883274	no	ATSOS4	miR865-3p:ATSOS4	0.919927
AT1G12240.1	miR775	1483	5	0.618288	0.745075	no	ATBETAFRUCT4	miR775:ATBETAFRUCT4	0.919992
AT2G33730.1	miR390a-5p	2200	5	0.199944	0.74149	no	NA	miR390a-5p:AT2G33730.1	0.922773
AT5G43760.1	miR854a	313	5.5	0.270693	0.99279	no	KCS20	miR854a:KCS20	0.922821
AT1G07040.1	miR5657	1219	5.5	0.420395	0.786519	no	NA	miR5657:AT1G07040.1	0.923424
AT1G11820.2	miR5021	131	5	0.224552	0.758619	no	NA	miR5021:AT1G11820.2	0.923424
AT1G48380.2	miR396a-5p	1173	6	0.216349	0.852653	no	HYP7	miR396a-5p:HYP7	0.923424
AT1G55250.4	miR8170-3p	677	5	0.0943325	0.594491	no	HUB2	miR8170-3p:HUB2	0.923424
AT1G66350.1	miR5021	39	6	0.313758	0.881646	no	RGL	miR5021:RGL	0.923424
AT1G68560.1	miR5650	2677	5	0.996643	0.618521	no	ATXYL1	miR5650:ATXYL1	0.923424
AT1G68720.1	miR5658	3992	5	0.087155	0.663802	no	ATTADA	miR5658:ATTADA	0.923424
AT1G75780.1	miR414	1350	5	0.17431	0.61334	no	TUB1	miR414:TUB1	0.923424
AT2G28830.1	miR414	521	5.5	0.0963832	0.763618	no	AtPUB12	miR414:AtPUB12	0.923424
AT2G36680.4	miR2111a-5p	234	6	0.122017	0.865535	no	NA	miR2111a-5p:AT2G36680.4	0.923424
AT3G22220.2	miR5021	2600	5	0.0256338	0.757626	no	NA	miR5021:AT3G22220.2	0.923424
AT3G22790.1	miR156c-3p	5200	6	0.0963832	0.849794	no	NET1A	miR156c-3p:NET1A	0.923424
AT4G10480.2	miR414	216	5	0.0933071	0.594265	no	NA	miR414:AT4G10480.2	0.923424
AT4G11420.1	miR773a	2668	5	0.215324	0.602188	no	ATEIF3A-1	miR773a:ATEIF3A-1	0.923424
AT4G14160.3	miR156h	1290	6	0.603933	0.855602	no	NA	miR156h:AT4G14160.3	0.923424
AT4G35830.2	miR5021	3068	4	0.11689	0.504697	no	ACO1	miR5021:ACO1	0.923424
AT4G39330.2	miR5656	20	5	0.730051	0.629751	no	ATCAD9	miR5656:ATCAD9	0.923424
AT5G11380.2	miR447a-3p	1816	5	0.353747	0.538608	no	DXPS3	miR447a-3p:DXPS3	0.923424
AT5G22650.2	miR414	638	5	1.8036	0.59347	no	ATHD2	miR414:ATHD2	0.923424
AT5G23540.2	miR8121	558	5	0.27582	0.476865	no	NA	miR8121:AT5G23540.2	0.923424
AT5G50920.1	miR173-3p	1539	5	0.943325	0.621345	no	ATHSP93-V	miR173-3p:ATHSP93-V	0.923424
AT5G52520.1	miR840-3p	1615	5	0.0902311	0.574968	no	OVA6	miR840-3p:OVA6	0.923424
AT5G57960.1	miR773a	1346	5.5	0.156879	0.741664	no	NA	miR773a:AT5G57960.1	0.923424
AT4G12420.2	miR414	2007	5	0.26249	0.589049	no	SKU5	miR414:SKU5	0.92668
AT4G16900.1	miR396b-5p	1714	5	0.15893	0.5679	no	NA	miR396b-5p:AT4G16900.1	0.92668
AT5G60160.1	miR393a-3p	1282	5	0.420395	0.559872	no	NA	miR393a-3p:AT5G60160.1	0.92668
AT1G66330.2	miR394b-3p	215	5.5	0.0676733	0.744685	no	NA	miR394b-3p:AT1G66330.2	0.926769
AT4G02530.1	miR870-3p	96	5.5	1.57289	0.764726	no	NA	miR870-3p:AT4G02530.1	0.928252
AT4G16530.1	miR414	2242	6	0.173285	1.00439	no	NA	miR414:AT4G16530.1	0.929298
AT3G16310.1	miR5017-3p	1316	5	0.306581	0.639609	no	NA	miR5017-3p:AT3G16310.1	0.933656
AT3G03540.1	miR398a-5p	1545	6	0.219426	0.833833	no	NPC5	miR398a-5p:NPC5	0.936861
AT1G50010.1	miR5641	96	6	0.371178	1.02139	no	TUA2	miR5641:TUA2	0.938455
AT1G02090.3	miR5648-5p	438	5	0.337341	0.507249	no	ATCSN7	miR5648-5p:ATCSN7	0.938945
AT1G11410.1	miR864-5p	1480	6	0.322986	0.847596	no	NA	miR864-5p:AT1G11410.1	0.938945
AT1G06220.2	miR780.1	1203	6	0.154828	0.960759	no	CLO	miR780.1:CLO	0.940055
AT1G45688.2	miR172b-5p	546	6	0.256338	0.983939	no	NA	miR172b-5p:AT1G45688.2	0.940055
AT5G15740.1	miR835-5p	1922	5.5	0.0676733	0.869704	no	NA	miR835-5p:AT5G15740.1	0.940055
AT5G55660.1	miR414	693	5	0.172259	0.701707	no	NA	miR414:AT5G55660.1	0.940055
AT5G66420.2	miR396b-5p	1636	5	0.197893	0.677153	no	NA	miR396b-5p:AT5G66420.2	0.940055
AT2G43560.1	miR773a	631	5	0.326062	0.548631	no	NA	miR773a:AT2G43560.1	0.940073
AT5G50920.1	miR858b	387	5.5	0.290175	0.714817	no	ATHSP93-V	miR858b:ATHSP93-V	0.941066
AT5G14910.1	miR5647	548	5	0.412192	0.568586	no	NA	miR5647:AT5G14910.1	0.945968
AT1G75790.1	miR3440b-3p	306	5.5	0.00717747	0.711651	no	sks18	miR3440b-3p:sks18	0.947268
AT1G78040.2	miR415	511	4.5	1.26221	0.377188	no	NA	miR415:AT1G78040.2	0.947268
AT1G80920.1	miR5658	210	5	0.111763	0.595992	no	AtJ8	miR5658:AtJ8	0.947268
AT2G29180.1	miR5021	281	6	0.280947	0.852587	no	NA	miR5021:AT2G29180.1	0.947268
AT3G01440.1	miR3434-3p	757	5.5	0.200969	0.744955	no	PnsL3	miR3434-3p:PnsL3	0.947268
AT3G46740.1	miR414	405	5.5	0.2184	0.730672	no	2018-03-01	miR414:MAR1	0.947268
AT3G52380.1	miR859	1111	5.5	0.234806	0.720572	no	CP33	miR859:CP33	0.947268
AT4G09670.1	miR415	1278	5	0.109713	0.642576	no	NA	miR415:AT4G09670.1	0.947268
AT5G10400.1	miR414	488	5	2.33063	0.539736	no	NA	miR414:AT5G10400.1	0.947268
AT5G12370.3	miR840-3p	1749	6	0.166107	0.832391	no	SEC10	miR840-3p:SEC10	0.947268
AT1G04210.1	miR5641	3897	5	0.211223	0.576156	no	NA	miR5641:AT1G04210.1	0.949555
AT1G07320.4	miR865-3p	595	5	0.998694	0.528362	no	EMB2784	miR865-3p:EMB2784	0.949555
AT1G07340.1	miR5638b	1117	5.5	0.0943325	0.667349	no	ATSTP2	miR5638b:ATSTP2	0.949555
AT1G09130.3	miR5021	123	5	0.23173	0.724412	no	NA	miR5021:AT1G09130.3	0.949555
AT1G18070.3	miR172b-5p	1600	5	0.150727	0.553314	no	NA	miR172b-5p:AT1G18070.3	0.949555
AT1G20010.1	miR847	1426	5	0.184564	0.460769	no	TUB5	miR847:TUB5	0.949555
AT1G20450.2	miR5632-5p	918	5	0.471662	0.464449	no	ERD10	miR5632-5p:ERD10	0.949555
AT1G21160.1	miR840-3p	3584	6	0.28915	0.821601	no	NA	miR840-3p:AT1G21160.1	0.949555
AT1G26920.1	miR3434-3p	78	6	0.588553	0.814005	no	NA	miR3434-3p:AT1G26920.1	0.949555
AT1G47970.1	miR414	263	5	0.197893	0.49247	no	NA	miR414:AT1G47970.1	0.949555
AT1G52300.1	miR778	330	6	2.30192	0.819144	no	NA	miR778:AT1G52300.1	0.949555
AT1G68010.2	miR5646	1243	5.5	0.634693	0.683572	no	ATHPR1	miR5646:ATHPR1	0.949555
AT1G68330.1	miR5641	619	6	0.00102535	0.820209	no	NA	miR5641:AT1G68330.1	0.949555
AT1G80410.2	miR823	1178	6	0.316834	0.825754	no	EMB2753	miR823:EMB2753	0.949555
AT2G02470.2	miR413	1001	6	0.60906	0.812559	no	AL6	miR413:AL6	0.949555
AT2G05220.2	miR847	336	5	0.0666479	0.448149	no	NA	miR847:AT2G05220.2	0.949555
AT2G21520.2	miR5998a	2156	5	0.0994592	0.456429	no	NA	miR5998a:AT2G21520.2	0.949555
AT2G24360.1	miR5021	56	6	0.510626	0.844151	no	NA	miR5021:AT2G24360.1	0.949555
AT2G24830.1	miR847	810	6	0.0810029	0.810809	no	NA	miR847:AT2G24830.1	0.949555
AT2G27030.3	miR837-5p	445	5	0.125093	0.481414	no	ACAM-2	miR837-5p:ACAM-2	0.949555
AT2G35040.2	miR5998a	1945	5	0.115865	0.436309	no	NA	miR5998a:AT2G35040.2	0.949555
AT2G41540.3	miR396b-5p	447	5.5	0.401938	0.698204	no	GPDHC1	miR396b-5p:GPDHC1	0.949555
AT3G04260.1	miR414	1975	5	0.0892057	0.517356	no	PDE324	miR414:PDE324	0.949555
AT3G18490.1	miR847	1195	5	0.866423	0.423588	no	ASPG1	miR847:ASPG1	0.949555
AT3G26180.2	miR8184	1200	5.5	0.156879	0.70726	no	CYP71B20	miR8184:CYP71B20	0.949555
AT3G27810.1	miR858a	499	5	0.0851043	0.387182	no	ATMYB21	miR858a:ATMYB21	0.949555
AT3G43860.1	miR398a-3p	668	6	0.33324	0.769268	no	AtGH9A4	miR398a-3p:AtGH9A4	0.949555
AT3G45310.2	miR167a-5p	639	5.5	0.104586	0.702139	no	NA	miR167a-5p:AT3G45310.2	0.949555
AT3G55010.2	miR156h	1370	5	0.0994592	0.655315	no	ATPURM	miR156h:ATPURM	0.949555
AT4G03180.1	miR414	458	5.5	0.0758761	0.708359	no	NA	miR414:AT4G03180.1	0.949555
AT4G17620.3	miR4239	340	6	0.0840789	0.809381	no	NA	miR4239:AT4G17620.3	0.949555
AT4G22220.1	miR172b-5p	545	5	0.107662	0.553626	no	ATISU1	miR172b-5p:ATISU1	0.949555
AT4G22820.2	miR394a	1026	5	0.106637	0.517074	no	NA	miR394a:AT4G22820.2	0.949555
AT4G30210.2	miR414	581	5.5	0.0943325	0.705741	no	AR2	miR414:AR2	0.949555
AT5G04810.1	miR5658	2747	5.5	0.473713	0.7347	no	NA	miR5658:AT5G04810.1	0.949555
AT5G37780.3	miR838	530	5	0.935122	0.450609	no	ACAM-1	miR838:ACAM-1	0.949555
AT5G37780.3	miR414	560	5	1.19556	0.511254	no	ACAM-1	miR414:ACAM-1	0.949555
AT5G38470.2	miR826b	297	5	0.173285	0.571774	no	RAD23D	miR826b:RAD23D	0.949555
AT5G57520.1	miR5021	161	6	0.169183	0.823734	no	ATZFP2	miR5021:ATZFP2	0.949555
AT5G63220.1	miR780.1	970	5.5	0.0512676	0.698761	no	NA	miR780.1:AT5G63220.1	0.949555
AT3G11330.1	miR776	467	6	0.30453	0.975465	no	PIRL9	miR776:PIRL9	0.949608
AT2G04570.1	miR834	401	5	0.342468	0.369406	no	NA	miR834:AT2G04570.1	0.950817
AT4G21150.3	miR396b-3p	1941	6	0.557792	0.811026	no	HAP6	miR396b-3p:HAP6	0.952109
AT4G37830.2	miR390a-5p	282	5	0.11689	0.687988	no	NA	miR390a-5p:AT4G37830.2	0.952651
AT1G80930.1	miR5641	2854	6	0.292226	0.807209	no	NA	miR5641:AT1G80930.1	0.953341
AT1G74450.1	miR865-3p	1331	6	0.0953578	0.807296	no	NA	miR865-3p:AT1G74450.1	0.954362
AT2G43710.2	miR157a-3p	517	5	0.177386	0.389341	no	FAB2	miR157a-3p:FAB2	0.954362
AT3G20520.1	miR5017-5p	2205	5	0.585476	0.44075	no	GDPDL5	miR5017-5p:GDPDL5	0.954362
AT3G44880.1	miR5021	177	5	0.0861296	0.687718	no	ACD1	miR5021:ACD1	0.954362
AT4G29020.2	miR172b-5p	319	5.5	0.315809	0.687245	no	NA	miR172b-5p:AT4G29020.2	0.954362
AT1G07990.1	miR472-5p	1914	5	0.326062	0.718376	no	NA	miR472-5p:AT1G07990.1	0.95459
AT1G18480.1	miR847	318	6	0.188665	0.959447	no	AtSLP2	miR847:AtSLP2	0.955094
AT1G21730.1	miR169a-3p	1938	6	0.228654	0.941837	no	NA	miR169a-3p:AT1G21730.1	0.955094
AT1G53850.2	miR5632-5p	954	6	0.577274	0.958263	no	ATPAE1	miR5632-5p:ATPAE1	0.955094
AT1G56290.1	miR865-3p	472	6	0.196868	0.963675	no	NA	miR865-3p:AT1G56290.1	0.955094
AT1G76030.1	miR859	1241	6	0.367076	0.964551	no	AtVAB1	miR859:AtVAB1	0.955094
AT2G04390.1	miR847	328	5	0.0369127	0.630755	no	NA	miR847:AT2G04390.1	0.955094
AT2G27050.1	miR5021	1226	6	0.0974085	1.01807	no	AtEIL1	miR5021:AtEIL1	0.955094
AT2G37180.1	miR5638b	802	6	0.052293	0.964295	no	PIP2;3	miR5638b:PIP2;3	0.955094
AT5G60548.1	miR838	638	6	0.00410141	0.953274	no	CPuORF62	miR838:CPuORF62	0.955094
AT5G60550.1	miR838	638	6	0.00410141	0.953274	no	ATSNAK1	miR838:ATSNAK1	0.955094
AT2G21600.1	miR159a	913	5	0.386558	0.368439	no	ATRER1B	miR159a:ATRER1B	0.958267
AT5G42400.1	miR8174	3347	6	0.276845	0.818035	no	ATXR7	miR8174:ATXR7	0.958267
AT2G16600.2	miR414	538	5.5	2.34703	0.821351	no	ROC3	miR414:ROC3	0.958746
AT1G80770.2	miR169d	807	5	0.270693	0.358351	no	PDE318	miR169d:PDE318	0.962101
AT1G19570.2	miR842	467	5	0.100485	0.420847	no	ATDHAR1	miR842:ATDHAR1	0.96309
AT1G27400.1	miR773a	591	5	0.375279	0.355655	no	NA	miR773a:AT1G27400.1	0.96309
AT5G15780.1	miR866-5p	837	6	0.488068	0.804353	no	NA	miR866-5p:AT5G15780.1	0.96309
AT2G31890.1	miR865-3p	717	5.5	0.0184564	0.677414	no	ATRAP	miR865-3p:ATRAP	0.963191
AT3G53920.1	miR157d	1879	5.5	0.466536	0.702744	no	SIG3	miR157d:SIG3	0.963191
AT4G13250.2	miR156i	1600	5	0.45013	0.591183	no	NYC1	miR156i:NYC1	0.963191
AT4G28660.2	miR157a-5p	159	5	0.106637	0.511196	no	PSB28	miR157a-5p:PSB28	0.963191
AT5G24850.1	miR830-5p	609	6	0.390659	0.791165	no	CRY3	miR830-5p:CRY3	0.963191
AT4G30530.1	miR861-3p	451	5.5	0.656226	0.661924	no	GGP1	miR861-3p:GGP1	0.963863
AT4G28780.1	miR156i	1327	5	0.0902311	0.582528	no	NA	miR156i:AT4G28780.1	0.96563
AT1G11700.1	miR164b-3p	318	6	0.124068	0.921027	no	NA	miR164b-3p:AT1G11700.1	0.967981
AT4G29130.1	miR3434-3p	415	5.5	0.0881803	0.806884	no	ATHXK1	miR3434-3p:ATHXK1	0.967981
AT2G16720.1	miR858a	330	6	0.0317859	0.908785	no	ATMYB7	miR858a:ATMYB7	0.969712
AT2G20260.1	miR834	241	6	0.483967	0.932357	no	PSAE-2	miR834:PSAE-2	0.969712
AT5G23730.1	miR164b-3p	855	5.5	0.124068	0.76809	no	EFO2	miR164b-3p:EFO2	0.969712
AT1G10940.2	miR847	1460	5.5	0.0851043	0.640883	no	ASK1	miR847:ASK1	0.970874
AT1G19520.2	miR4227	683	6	0.301454	0.772406	no	NFD5	miR4227:NFD5	0.970874
AT1G27310.1	miR8174	187	5.5	0.2912	0.663378	no	NTF2A	miR8174:NTF2A	0.970874
AT1G31550.2	miR401	206	6	0.0779268	0.771705	no	NA	miR401:AT1G31550.2	0.970874
AT1G57750.2	miR414	1303	5	0.0994592	0.303136	no	CYP96A15	miR414:CYP96A15	0.970874
AT2G23080.2	miR774b-5p	1139	5.5	0.185589	0.684075	no	CKA3	miR774b-5p:CKA3	0.970874
AT2G37170.1	miR5638b	797	6	0.141499	0.789403	no	PIP2;2	miR5638b:PIP2;2	0.970874
AT2G38040.2	miR396a-5p	1994	5.5	0.166107	0.650885	no	CAC3	miR396a-5p:CAC3	0.970874
AT3G01550.1	miR4228-5p	1027	5.5	0.168158	0.644286	no	ATPPT2	miR4228-5p:ATPPT2	0.970874
AT3G13960.1	miR5658	1067	6	0.192766	0.804881	no	AtGRF5	miR5658:AtGRF5	0.970874
AT3G51670.1	miR156g	1209	5.5	0.0840789	0.658625	no	NA	miR156g:AT3G51670.1	0.970874
AT3G52300.2	miR5021	56	6	0.714671	0.790572	no	ATPQ	miR5021:ATPQ	0.970874
AT4G19160.3	miR417	862	5	0.47884	0.36181	no	NA	miR417:AT4G19160.3	0.970874
AT4G21210.2	miR390b-3p	434	5	0.155854	0.3761	no	ATRP1	miR390b-3p:ATRP1	0.970874
AT4G23820.1	miR870-5p	1356	5	0.539336	0.526342	no	NA	miR870-5p:AT4G23820.1	0.970874
AT4G26230.1	miR398a-3p	115	5.5	0.477814	0.609089	no	NA	miR398a-3p:AT4G26230.1	0.970874
AT4G34120.1	miR5021	293	5	0.329138	0.642906	no	CBSX2	miR5021:CBSX2	0.970874
AT5G09225.1	miR415	463	6	0.204045	0.737482	no	NA	miR415:AT5G09225.1	0.970874
AT5G52440.1	miR5021	167	6	0.18764	0.786725	no	HCF106	miR5021:HCF106	0.970874
AT1G15390.1	miR391-3p	620	5.5	0.191741	0.733632	no	ATDEF1	miR391-3p:ATDEF1	0.973296
AT1G20693.3	miR414	583	5.5	0.82746	0.760915	no	HMG BETA 1	miR414:HMG BETA 1	0.973296
AT1G33680.1	miR5661	2446	6	0.201995	0.898106	no	NA	miR5661:AT1G33680.1	0.973296
AT1G47900.2	miR158a-5p	2298	6	0.132271	0.894676	no	NA	miR158a-5p:AT1G47900.2	0.973296
AT2G11910.2	miR414	286	6	0.799775	0.888173	no	NA	miR414:AT2G11910.2	0.973296
AT2G33800.1	miR3434-5p	760	6	0.596755	0.889223	no	EMB3113	miR3434-5p:EMB3113	0.973296
AT2G44100.2	miR865-3p	596	6	0.458333	0.882702	no	AT-GDI1	miR865-3p:AT-GDI1	0.973296
AT3G01390.2	miR837-5p	470	5.5	0.458333	0.746102	no	AVMA10	miR837-5p:AVMA10	0.973296
AT3G11710.1	miR780.1	1042	5.5	0.342468	0.712618	no	ATKRS-1	miR780.1:ATKRS-1	0.973296
AT3G50820.1	miR782	1083	6	1.14327	0.885232	no	OEC33	miR782:OEC33	0.973296
AT4G35300.5	miR837-5p	2294	5.5	0.214299	0.734993	no	TMT2	miR837-5p:TMT2	0.973296
AT4G38400.1	miR852	166	6	0.0215324	0.85497	no	ATEXLA2	miR852:ATEXLA2	0.973296
AT5G04140.2	miR773b-3p	3494	6	0.330164	0.875192	no	FD-GOGAT	miR773b-3p:FD-GOGAT	0.973296
AT5G07900.1	miR5020b	341	6	0.0933071	0.898843	no	NA	miR5020b:AT5G07900.1	0.973296
AT5G23290.1	miR5646	286	6	0.0902311	0.882185	no	PFD5	miR5646:PFD5	0.973296
AT5G59850.1	miR776	311	6	1.22735	0.871956	no	NA	miR776:AT5G59850.1	0.973296
AT5G67250.1	miR826b	1752	6	0.113814	0.889459	no	SKIP2	miR826b:SKIP2	0.973296
AT1G66670.1	miR397a	819	5.5	0.368102	0.639548	no	CLPP3	miR397a:CLPP3	0.973655
AT5G46070.1	miR844-5p	1450	5.5	0.190716	0.646851	no	NA	miR844-5p:AT5G46070.1	0.976125
AT2G42500.3	miR835-5p	294	6	0.173285	0.875313	no	PP2A-3	miR835-5p:PP2A-3	0.978603
AT1G64090.2	miR5021	412	5	0.0963832	0.629995	no	RTNLB3	miR5021:RTNLB3	0.980086
AT2G04570.1	miR1888b	104	6	0.300428	0.875714	no	NA	miR1888b:AT2G04570.1	0.980708
AT3G18960.1	miR838	707	6	0.252237	0.864145	no	NA	miR838:AT3G18960.1	0.980708
AT3G28730.1	miR396b-5p	181	6	0.0810029	0.850033	no	ATHMG	miR396b-5p:ATHMG	0.980708
AT5G48360.1	miR8166	2269	6	0.179437	0.88737	no	NA	miR8166:AT5G48360.1	0.980708
AT5G49100.1	miR5021	1170	6	0.2184	0.902756	no	NA	miR5021:AT5G49100.1	0.980708
AT5G64310.1	miR417	426	6	0.290175	0.879743	no	AGP1	miR417:AGP1	0.980708
AT1G79920.2	miR397a	732	6	0.0574198	0.841668	no	AtHsp70-15	miR397a:AtHsp70-15	0.98161
AT1G80870.1	miR838	1560	6	0.128169	0.755022	no	NA	miR838:AT1G80870.1	0.981658
AT5G45670.1	miR5014b	979	5.5	0.279921	0.644013	no	NA	miR5014b:AT5G45670.1	0.981658
AT5G55730.2	miR5658	100	6	0.199944	0.783172	no	FLA1	miR5658:FLA1	0.981658
AT1G66180.1	miR5021	391	5	0.175335	0.731847	no	NA	miR5021:AT1G66180.1	0.981917
AT1G79930.2	miR397a	787	6	0.0594705	0.839873	no	AtHsp70-14	miR397a:AtHsp70-14	0.983072
AT3G05970.1	miR414	1626	5.5	0.107662	0.712453	no	ATLACS6	miR414:ATLACS6	0.983338
AT3G53580.1	miR397a	1110	6	0.250186	0.748814	no	NA	miR397a:AT3G53580.1	0.983624
AT3G15830.1	miR5021	617	6	0.0789522	0.895343	no	NA	miR5021:AT3G15830.1	0.983799
AT3G55630.3	miR397b	792	6	0.108687	0.753882	no	ATDFD	miR397b:ATDFD	0.984895
AT3G11650.1	miR5027	739	6	0.208147	0.848733	no	NHL2	miR5027:NHL2	0.985167
AT2G21960.1	miR775	780	5.5	0.200969	0.605224	no	NA	miR775:AT2G21960.1	0.986227
AT2G44060.2	miR414	1037	5.5	0.961781	0.626631	no	NA	miR414:AT2G44060.2	0.986227
AT4G09000.2	miR5641	153	5.5	0.39271	0.616481	no	GF14 CHI	miR5641:GF14 CHI	0.986227
AT5G02830.1	miR870-3p	1911	5.5	0.151752	0.638124	no	NA	miR870-3p:AT5G02830.1	0.986227
AT5G23210.4	miR168b-3p	978	6	0.192766	0.75622	no	SCPL34	miR168b-3p:SCPL34	0.986227
AT3G02468.1	miR854a	813	5	0.0810029	0.475268	no	CPuORF9	miR854a:CPuORF9	0.987312
AT3G02470.4	miR854a	866	5	0.0810029	0.475268	no	SAMDC	miR854a:SAMDC	0.987312
AT1G79050.2	miR868-3p	1065	5.5	0.120992	0.612728	no	RECA1	miR868-3p:RECA1	0.987407
AT3G23810.1	miR408-5p	709	5	2.4106	0.438574	no	ATSAHH2	miR408-5p:ATSAHH2	0.987709
AT1G12080.2	miR4221	353	5.5	0.33529	0.655966	no	NA	miR4221:AT1G12080.2	0.98881
AT1G44750.3	miR157d	953	6	0.2912	0.861175	no	ATPUP11	miR157d:ATPUP11	0.98881
AT4G17270.1	miR5663-5p	1285	6	0.18764	0.842214	no	NA	miR5663-5p:AT4G17270.1	0.98881
AT5G12150.2	miR2937	2773	6	0.608034	0.852196	no	NA	miR2937:AT5G12150.2	0.98881
AT5G23730.1	miR396a-5p	836	6	0.215324	0.830446	no	EFO2	miR396a-5p:EFO2	0.98881
AT5G38650.1	miR866-3p	315	6	0.65315	0.844002	no	NA	miR866-3p:AT5G38650.1	0.98881
AT5G38660.2	miR866-3p	1157	6	0.65315	0.844002	no	APE1	miR866-3p:APE1	0.98881
AT5G48655.3	miR4221	578	6	0.107662	0.841811	no	NA	miR4221:AT5G48655.3	0.98898
AT1G20260.1	miR859	1238	6	0.441927	0.834944	no	AtVAB3	miR859:AtVAB3	0.989107
AT4G26670.1	miR5659	666	5.5	0.0922818	0.61638	no	NA	miR5659:AT4G26670.1	0.989113
AT3G58660.1	miR414	1016	5.5	0.0799775	0.676358	no	NA	miR414:AT3G58660.1	0.989627
AT4G09650.1	miR159b-3p	88	5.5	0.207121	0.643926	no	ATPD	miR159b-3p:ATPD	0.989627
AT5G05750.1	miR870-3p	1272	6	0.181487	0.846467	no	NA	miR870-3p:AT5G05750.1	0.989627
AT5G11740.1	miR5020b	190	5	0.539336	0.356066	no	AGP15	miR5020b:AGP15	0.990172
AT1G01080.2	miR447c-3p	513	5.5	0.234806	0.575308	no	NA	miR447c-3p:AT1G01080.2	0.993024
AT1G13940.1	miR414	2418	6	0.0861296	0.756476	no	NA	miR414:AT1G13940.1	0.993971
AT5G62390.1	miR838	878	6	0.204045	0.738874	no	ATBAG7	miR838:ATBAG7	0.993971
AT2G18160.1	miR5633	829	5.5	0.548564	0.693972	no	ATBZIP2	miR5633:ATBZIP2	0.994348
AT2G18162.1	miR5633	829	5.5	0.548564	0.693972	no	CPuORF1	miR5633:CPuORF1	0.994348
AT1G65060.2	miR859	1368	5.5	0.37733	0.575951	no	4CL3	miR859:4CL3	0.995876
AT2G32760.2	miR5998a	923	6	0.087155	0.762088	no	NA	miR5998a:AT2G32760.2	0.995876
AT2G37050.3	miR169g-3p	2744	6	0.195842	0.716704	no	NA	miR169g-3p:AT2G37050.3	0.995876
AT3G15840.5	miR867	393	5.5	0.466536	0.624773	no	PIFI	miR867:PIFI	0.995876
AT3G52560.4	miR414	259	5.5	0.178411	0.58718	no	MMZ4	miR414:MMZ4	0.995876
AT4G34110.1	miR4243	473	5.5	0.106637	0.613826	no	ATPAB2	miR4243:ATPAB2	0.995876
AT5G03660.2	miR840-3p	491	5.5	0.226603	0.576441	no	NA	miR840-3p:AT5G03660.2	0.995876
AT5G23940.1	miR5645a	976	5.5	0.17431	0.595172	no	DCR	miR5645a:DCR	0.995876
AT5G25760.2	miR395b	586	6	0.437826	0.731771	no	PEX4	miR395b:PEX4	0.995876
AT5G45428.1	miR8175	1659	6	0.206096	0.705084	no	CPuORF24	miR8175:CPuORF24	0.995876
AT5G45430.2	miR8175	1711	6	0.206096	0.705084	no	NA	miR8175:AT5G45430.2	0.995876
AT5G55920.1	miR5649a	1541	5.5	0.205071	0.615239	no	OLI2	miR5649a:OLI2	0.995876
AT5G55940.1	miR156i	825	6	0.251211	0.741233	no	emb2731	miR156i:emb2731	0.995876
AT5G63840.1	miR5019	1722	6	0.271719	0.735512	no	PSL5	miR5019:PSL5	0.995876
AT1G43690.1	miR396b-5p	556	6	0.0717747	0.796536	no	NA	miR396b-5p:AT1G43690.1	0.99622
AT1G52600.1	miR868-5p	592	5.5	0.273769	0.659285	no	NA	miR868-5p:AT1G52600.1	0.99622
AT2G03820.1	miR414	1623	6	0.278896	0.819888	no	AtNMD3	miR414:AtNMD3	0.99622
AT3G14900.1	miR774b-3p	1260	6	0.103561	0.809062	no	EMB3120	miR774b-3p:EMB3120	0.99622
AT4G20320.2	miR172d-5p	924	5.5	0.178411	0.624512	no	NA	miR172d-5p:AT4G20320.2	0.99622
AT4G24960.3	miR414	695	5.5	0.154828	0.640192	no	ATHVA22D	miR414:ATHVA22D	0.99622
AT5G12140.1	miR846-5p	430	6	0.393736	0.805604	no	ATCYS1	miR846-5p:ATCYS1	0.99622
AT5G20020.1	miR5665	647	5.5	0.13022	0.650588	no	RAN2	miR5665:RAN2	0.99622
AT2G32060.3	miR5666	435	5.5	0.383482	0.633083	no	NA	miR5666:AT2G32060.3	0.996814
AT1G48920.1	miR414	1280	5.5	0.518829	0.579239	no	ATNUC-L1	miR414:ATNUC-L1	0.99883
AT1G01550.2	miR5665	146	6	0.103561	0.683664	no	BPS1	miR5665:BPS1	0.999993
AT1G02205.3	miR774b-3p	1614	6	0.10151	0.204418	no	CER1	miR774b-3p:CER1	0.999993
AT1G02280.2	miR5650	645	6	0.39271	0.68521	no	ATTOC33	miR5650:ATTOC33	0.999993
AT1G04120.2	miR156g	5166	6	0.415268	0.558527	no	ABCC5	miR156g:ABCC5	0.999993
AT1G04410.1	miR171c-5p	666	6	0.673657	0.517644	no	c-NAD-MDH1	miR171c-5p:c-NAD-MDH1	0.999993
AT1G07920.1	miR861-5p	491	6	0.442952	0.537893	no	NA	miR861-5p:AT1G07920.1	0.999993
AT1G07930.2	miR861-5p	503	6	0.774141	0.450091	no	NA	miR861-5p:AT1G07930.2	0.999993
AT1G07940.2	miR861-5p	622	6	0.552665	0.410565	no	NA	miR861-5p:AT1G07940.2	0.999993
AT1G07960.3	miR156h	19	6	0.10151	0.66631	no	ATPDIL5-1	miR156h:ATPDIL5-1	0.999993
AT1G09200.1	miR4221	102	6	0.442952	0.702837	no	NA	miR4221:AT1G09200.1	0.999993
AT1G10630.1	miR866-5p	325	6	0.290175	0.634763	no	ARFA1F	miR866-5p:ARFA1F	0.999993
AT1G10850.1	miR837-5p	2217	6	0.106637	0.745729	no	NA	miR837-5p:AT1G10850.1	0.999993
AT1G11660.1	miR414	2002	6	0.0810029	0.57289	no	NA	miR414:AT1G11660.1	0.999993
AT1G11860.3	miR843	518	6	0.181487	0.499842	no	NA	miR843:AT1G11860.3	0.999993
AT1G11910.1	miR172d-5p	1558	6	0.157904	0.464097	no	APA1	miR172d-5p:APA1	0.999993
AT1G13280.1	miR172b-5p	973	6	0.296327	0.61068	no	AOC4	miR172b-5p:AOC4	0.999993
AT1G14320.2	miR447c-3p	453	6	2.8956	0.585109	no	RPL10	miR447c-3p:RPL10	0.999993
AT1G15500.1	miR172e-3p	1904	6	0.0902311	0.728632	no	ATNTT2	miR172e-3p:ATNTT2	0.999993
AT1G16880.2	miR5021	47	5	0.211223	0.240621	no	ACR11	miR5021:ACR11	0.999993
AT1G17745.2	miR839-5p	1917	6	0.464485	0.555906	no	PGDH	miR839-5p:PGDH	0.999993
AT1G18190.1	miR844-3p	1923	6	0.109713	0.628034	no	GC2	miR844-3p:GC2	0.999993
AT1G20100.2	miR5641	746	6	0.143549	0.712055	no	NA	miR5641:AT1G20100.2	0.999993
AT1G20693.3	miR390a-3p	589	5.5	0.124068	0.503276	no	HMG BETA 1	miR390a-3p:HMG BETA 1	0.999993
AT1G23280.1	miR5645a	856	6	0.0943325	0.714721	no	NA	miR5645a:AT1G23280.1	0.999993
AT1G27350.1	miR835-3p	104	6	0.341443	0.804461	no	NA	miR835-3p:AT1G27350.1	0.999993
AT1G29880.1	miR835-5p	1997	6	0.208147	0.75084	no	NA	miR835-5p:AT1G29880.1	0.999993
AT1G30230.2	miR5665	662	6	0.68391	0.377077	no	eEF-1Bb1	miR5665:eEF-1Bb1	0.999993
AT1G30230.2	miR5021	834	5	0.564969	0.368819	no	eEF-1Bb1	miR5021:eEF-1Bb1	0.999993
AT1G30690.2	miR414	832	6	0.170209	0.474686	no	NA	miR414:AT1G30690.2	0.999993
AT1G33980.2	miR824-3p	1236	5.5	0.0707493	0.54609	no	ATUPF3	miR824-3p:ATUPF3	0.999993
AT1G33980.2	miR160a-3p	1296	6	0.220451	0.686324	no	ATUPF3	miR160a-3p:ATUPF3	0.999993
AT1G44920.1	miR418	600	6	0.281972	0.726366	no	NA	miR418:AT1G44920.1	0.999993
AT1G50450.1	miR4221	1316	6	0.104586	0.651206	no	NA	miR4221:AT1G50450.1	0.999993
AT1G51560.1	miR843	1068	6	0.105611	0.609789	no	NA	miR843:AT1G51560.1	0.999993
AT1G52030.2	miR4239	1548	6	1.11558	0.476366	no	F-ATMBP	miR4239:F-ATMBP	0.999993
AT1G55670.1	miR157d	654	5.5	2.30909	0.485065	no	PSAG	miR157d:PSAG	0.999993
AT1G60940.2	miR858a	1020	6	0.0943325	0.753047	no	SNRK2-10	miR858a:SNRK2-10	0.999993
AT1G60950.1	miR773b-3p	423	5.5	0.369127	0.28751	no	ATFD2	miR773b-3p:ATFD2	0.999993
AT1G61680.2	miR393a-3p	1146	6	0.112789	0.582456	no	ATTPS14	miR393a-3p:ATTPS14	0.999993
AT1G61900.3	miR854a	1474	6	0.505499	0.803973	no	NA	miR854a:AT1G61900.3	0.999993
AT1G62390.1	miR847	1421	5.5	0.177386	0.541058	no	CLMP1	miR847:CLMP1	0.999993
AT1G62480.1	miR838	473	5.5	0.190716	0.604115	no	NA	miR838:AT1G62480.1	0.999993
AT1G64090.2	miR5658	1173	6	0.6552	0.718007	no	RTNLB3	miR5658:RTNLB3	0.999993
AT1G64770.3	miR2111a-5p	848	6	0.144575	0.492776	no	NDF2	miR2111a-5p:NDF2	0.999993
AT1G64980.1	miR2111b-3p	567	6	0.100485	0.653928	no	CDI	miR2111b-3p:CDI	0.999993
AT1G65840.1	miR5021	1998	5.5	0.398862	0.386012	no	ATPAO4	miR5021:ATPAO4	0.999993
AT1G66240.3	miR5020a	57	6	0.208147	0.614557	no	ATATX1	miR5020a:ATATX1	0.999993
AT1G66260.2	miR394a	983	5.5	0.0912564	0.566925	no	NA	miR394a:AT1G66260.2	0.999993
AT1G67080.1	miR774b-5p	213	6	0.0912564	0.752523	no	ABA4	miR774b-5p:ABA4	0.999993
AT1G68590.2	miR869.1	351	6	0.470637	0.68225	no	PSRP3/1	miR869.1:PSRP3/1	0.999993
AT1G70490.3	miR866-5p	435	6	1.14532	0.435231	no	ARFA1D	miR866-5p:ARFA1D	0.999993
AT1G72020.1	miR5651	278	6	0.424496	0.577114	no	NA	miR5651:AT1G72020.1	0.999993
AT1G74060.1	miR835-3p	810	5.5	0.18764	0.244709	no	NA	miR835-3p:AT1G74060.1	0.999993
AT1G75990.1	miR172e-3p	364	6	0.181487	0.606053	no	NA	miR172e-3p:AT1G75990.1	0.999993
AT1G77840.1	miR3434-5p	1017	6	0.0799775	0.66525	no	NA	miR3434-5p:AT1G77840.1	0.999993
AT1G80380.4	miR5661	829	5.5	0.407065	0.493931	no	NA	miR5661:AT1G80380.4	0.999993
AT1G80750.1	miR838	227	5.5	0.0851043	0.363884	no	NA	miR838:AT1G80750.1	0.999993
AT2G02910.1	miR865-3p	632	6	0.0830536	0.731353	no	NA	miR865-3p:AT2G02910.1	0.999993
AT2G03470.2	miR5013	978	6	0.193792	0.653619	no	NA	miR5013:AT2G03470.2	0.999993
AT2G10940.2	miR862-5p	726	6	1.10123	0.568095	no	NA	miR862-5p:AT2G10940.2	0.999993
AT2G13360.2	miR5021	1381	5.5	0.656226	0.45293	no	AGT	miR5021:AGT	0.999993
AT2G17350.1	miR865-3p	261	6	0.0902311	0.643132	no	NA	miR865-3p:AT2G17350.1	0.999993
AT2G17390.1	miR5014a-5p	691	6	0.164056	0.633426	no	AKR2B	miR5014a-5p:AKR2B	0.999993
AT2G17420.1	miR414	817	6	0.167133	0.594935	no	ATNTRA	miR414:ATNTRA	0.999993
AT2G19730.3	miR8168	455	6	0.102535	0.48408	no	NA	miR8168:AT2G19730.3	0.999993
AT2G20140.1	miR172b-5p	552	6	0.0369127	0.591986	no	RPT2b	miR172b-5p:RPT2b	0.999993
AT2G20260.1	miR5631	141	5.5	0.477814	0.514875	no	PSAE-2	miR5631:PSAE-2	0.999993
AT2G23120.1	miR8176	270	5.5	0.433724	0.521108	no	NA	miR8176:AT2G23120.1	0.999993
AT2G23350.1	miR854a	2192	5.5	0.628541	0.72515	no	PAB4	miR854a:PAB4	0.999993
AT2G25430.1	miR863-3p	433	6	0.0820282	0.530749	no	NA	miR863-3p:AT2G25430.1	0.999993
AT2G28910.1	miR414	876	5.5	0.152778	0.350212	no	CXIP4	miR414:CXIP4	0.999993
AT2G31380.1	miR5021	43	6	0.232755	0.678379	no	BBX25	miR5021:BBX25	0.999993
AT2G31670.1	miR396b-5p	685	5.5	0.368102	0.526908	no	NA	miR396b-5p:AT2G31670.1	0.999993
AT2G32260.1	miR5595a	846	6	0.0851043	0.651136	no	ATCCT1	miR5595a:ATCCT1	0.999993
AT2G32730.1	miR5650	2059	6	0.0728001	0.456235	no	NA	miR5650:AT2G32730.1	0.999993
AT2G33040.1	miR824-5p	475	5.5	0.0851043	0.462477	no	ATP3	miR824-5p:ATP3	0.999993
AT2G35490.1	miR399c-5p	1185	6	0.576248	0.611176	no	NA	miR399c-5p:AT2G35490.1	0.999993
AT2G36145.1	miR396b-5p	563	6	0.176361	0.697315	no	NA	miR396b-5p:AT2G36145.1	0.999993
AT2G36470.1	miR837-5p	1524	6	0.103561	0.603877	no	NA	miR837-5p:AT2G36470.1	0.999993
AT2G36810.1	miR868-3p	4556	6	0.0728001	0.618265	no	NA	miR868-3p:AT2G36810.1	0.999993
AT2G36880.2	miR5021	1600	5.5	0.0892057	0.445908	no	MAT3	miR5021:MAT3	0.999993
AT2G37110.1	miR5014a-5p	463	6	0.177386	0.589986	no	NA	miR5014a-5p:AT2G37110.1	0.999993
AT2G39730.3	miR5640	123	6	0.105611	0.34152	no	RCA	miR5640:RCA	0.999993
AT2G39730.3	miR863-5p	420	6	1.96765	0.282747	no	RCA	miR863-5p:RCA	0.999993
AT2G40190.1	miR5996	670	6	0.198918	0.786186	no	LEW3	miR5996:LEW3	0.999993
AT2G41430.5	miR3434-5p	702	5.5	0.332214	0.533084	no	CID1	miR3434-5p:CID1	0.999993
AT2G43710.2	miR5632-5p	1274	6	0.303504	0.575166	no	FAB2	miR5632-5p:FAB2	0.999993
AT2G44100.2	miR156i	1564	6	0.214299	0.506473	no	AT-GDI1	miR156i:AT-GDI1	0.999993
AT2G45580.1	miR447c-3p	1499	5.5	0.221476	0.561849	no	CYP76C3	miR447c-3p:CYP76C3	0.999993
AT2G46490.1	miR447a-3p	240	6	0.100485	0.696808	no	NA	miR447a-3p:AT2G46490.1	0.999993
AT2G47110.2	miR838	303	6	0.495245	0.492281	no	UBI6	miR838:UBI6	0.999993
AT3G01120.1	miR8177	1768	6	0.679809	0.794401	no	AtCGS1	miR8177:AtCGS1	0.999993
AT3G04290.1	miR5661	669	5.5	1.29092	0.445761	no	ATLTL1	miR5661:ATLTL1	0.999993
AT3G05590.1	miR773a	398	6	0.466536	0.587799	no	RPL18	miR773a:RPL18	0.999993
AT3G07820.1	miR833a-5p	992	6	0.113814	0.667952	no	NA	miR833a-5p:AT3G07820.1	0.999993
AT3G09980.1	miR5021	909	6	0.0984339	0.629319	no	NA	miR5021:AT3G09980.1	0.999993
AT3G10060.1	miR390a-5p	697	6	0.192766	0.689849	no	NA	miR390a-5p:AT3G10060.1	0.999993
AT3G11170.1	miR5663-5p	796	6	0.594705	0.650396	no	AtFAD7	miR5663-5p:AtFAD7	0.999993
AT3G12320.1	miR5021	25	6	0.0512676	0.476368	no	NA	miR5021:AT3G12320.1	0.999993
AT3G12610.1	miR3932a	1000	6	0.622389	0.283853	no	DRT100	miR3932a:DRT100	0.999993
AT3G12610.1	miR172d-5p	646	5.5	0.327088	0.453134	no	DRT100	miR172d-5p:DRT100	0.999993
AT3G13470.1	miR833b	336	6	0.0953578	0.586875	no	Cpn60beta2	miR833b:Cpn60beta2	0.999993
AT3G15480.1	miR858b	227	5.5	0.0830536	0.498178	no	NA	miR858b:AT3G15480.1	0.999993
AT3G17160.1	miR847	291	6	0.115865	0.693489	no	NA	miR847:AT3G17160.1	0.999993
AT3G19820.3	miR397b	1251	5.5	0.18969	0.33186	no	CBB1	miR397b:CBB1	0.999993
AT3G22190.2	miR5998a	1690	6	0.170209	0.678815	no	IQD5	miR5998a:IQD5	0.999993
AT3G23390.1	miR832-3p	416	6	0.394761	0.495859	no	NA	miR832-3p:AT3G23390.1	0.999993
AT3G24200.2	miR5648-3p	1720	6	0.0974085	0.762698	no	NA	miR5648-3p:AT3G24200.2	0.999993
AT3G28500.1	miR2936	237	6	0.40604	0.546048	no	NA	miR2936:AT3G28500.1	0.999993
AT3G46780.1	miR828	1591	6	0.209172	0.652515	no	PTAC16	miR828:PTAC16	0.999993
AT3G48930.1	miR5020c	437	6	0.822333	0.290344	no	EMB1080	miR5020c:EMB1080	0.999993
AT3G49910.1	miR172b-5p	606	5.5	0.892057	0.359263	no	NA	miR172b-5p:AT3G49910.1	0.999993
AT3G52590.1	miR5024-3p	122	6	0.26044	0.564594	no	EMB2167	miR5024-3p:EMB2167	0.999993
AT3G54050.2	miR169a-3p	783	6	0.403989	0.290329	no	HCEF1	miR169a-3p:HCEF1	0.999993
AT3G54080.1	miR172b-5p	584	6	0.0789522	0.775285	no	NA	miR172b-5p:AT3G54080.1	0.999993
AT3G56020.1	miR831-3p	71	6	2.45059	0.512119	no	NA	miR831-3p:AT3G56020.1	0.999993
AT3G62250.1	miR838	281	6	0.296327	0.485274	no	UBQ5	miR838:UBQ5	0.999993
AT4G01050.1	miR397b	911	6	0.259414	0.513004	no	TROL	miR397b:TROL	0.999993
AT4G01150.2	miR3440b-3p	252	5.5	0.26249	0.544264	no	NA	miR3440b-3p:AT4G01150.2	0.999993
AT4G02930.1	miR1886.2	871	6	0.330164	0.498133	no	NA	miR1886.2:AT4G02930.1	0.999993
AT4G09730.1	miR868-5p	1016	6	0.198918	0.682081	no	RH39	miR868-5p:RH39	0.999993
AT4G14880.4	miR5998a	890	6	0.364	0.664714	no	ATCYS-3A	miR5998a:ATCYS-3A	0.999993
AT4G15790.1	miR854a	256	6	0.178411	0.869165	no	NA	miR854a:AT4G15790.1	0.999993
AT4G15790.1	miR834	691	6	0.110738	0.723498	no	NA	miR834:AT4G15790.1	0.999993
AT4G18970.2	miR862-5p	1262	6	0.1456	0.41254	no	NA	miR862-5p:AT4G18970.2	0.999993
AT4G21150.3	miR8166	1711	5.5	0.245059	0.575958	no	HAP6	miR8166:HAP6	0.999993
AT4G21660.2	miR779.1	1804	6	0.0953578	0.789983	no	NA	miR779.1:AT4G21660.2	0.999993
AT4G23470.3	miR4245	1039	6	0.33324	0.702747	no	NA	miR4245:AT4G23470.3	0.999993
AT4G24770.1	miR854a	1111	5.5	0.72595	0.509886	no	ATRBP31	miR854a:ATRBP31	0.999993
AT4G24770.1	miR156a-3p	492	6	0.531133	0.562592	no	ATRBP31	miR156a-3p:ATRBP31	0.999993
AT4G24820.2	miR160c-3p	269	6	0.373228	0.637362	no	NA	miR160c-3p:AT4G24820.2	0.999993
AT4G26180.1	miR2111b-3p	638	6	0.10151	0.603432	no	NA	miR2111b-3p:AT4G26180.1	0.999993
AT4G26370.2	miR846-5p	947	6	0.109713	0.742161	no	NA	miR846-5p:AT4G26370.2	0.999993
AT4G26630.2	miR414	2451	6	0.186614	0.706829	no	NA	miR414:AT4G26630.2	0.999993
AT4G27130.1	miR5632-3p	173	6	0.0912564	0.566925	no	NA	miR5632-3p:AT4G27130.1	0.999993
AT4G29040.1	miR172b-5p	582	6	0.0974085	0.555907	no	RPT2a	miR172b-5p:RPT2a	0.999993
AT4G30660.2	miR2111b-3p	224	6	0.23173	0.772885	no	NA	miR2111b-3p:AT4G30660.2	0.999993
AT4G30960.1	miR842	378	6	0.10151	0.499368	no	ATCIPK6	miR842:ATCIPK6	0.999993
AT4G33680.1	miR5658	1468	6	0.123042	0.587507	no	AGD2	miR5658:AGD2	0.999993
AT4G34100.2	miR773a	2994	5.5	0.0994592	0.525554	no	CER9	miR773a:CER9	0.999993
AT4G38740.1	miR776	534	6	1.12584	0.760758	no	ROC1	miR776:ROC1	0.999993
AT4G39330.2	miR841b-5p	348	6	0.100485	0.35477	no	ATCAD9	miR841b-5p:ATCAD9	0.999993
AT4G39350.1	miR8166	3338	6	0.239933	0.688938	no	ATCESA2	miR8166:ATCESA2	0.999993
AT5G01530.1	miR5662	896	5.5	0.126118	0.323186	no	LHCB4.1	miR5662:LHCB4.1	0.999993
AT5G03530.1	miR870-3p	306	6	0.236857	0.567584	no	ATRAB	miR870-3p:ATRAB	0.999993
AT5G05010.2	miR841b-3p	1436	6	0.899234	0.70341	no	NA	miR841b-3p:AT5G05010.2	0.999993
AT5G06290.1	miR5021	192	6	0.0974085	0.775969	no	2-Cys Prx B	miR5021:2-Cys Prx B	0.999993
AT5G13630.2	miR773a	3940	6	0.169183	0.255996	no	ABAR	miR773a:ABAR	0.999993
AT5G15220.1	miR5662	222	6	0.135347	0.61884	no	NA	miR5662:AT5G15220.1	0.999993
AT5G15530.1	miR3434-3p	762	6	0.673657	0.646886	no	BCCP2	miR3434-3p:BCCP2	0.999993
AT5G20070.1	miR2936	1339	6	0.123042	0.641534	no	ATNUDT19	miR2936:ATNUDT19	0.999993
AT5G20890.1	miR5663-5p	866	6	0.184564	0.646751	no	NA	miR5663-5p:AT5G20890.1	0.999993
AT5G23740.1	miR399f	552	6	1.41704	0.352081	no	RPS11-BETA	miR399f:RPS11-BETA	0.999993
AT5G26360.1	miR3434-5p	556	6	0.0769015	0.587969	no	NA	miR3434-5p:AT5G26360.1	0.999993
AT5G28640.1	miR779.1	944	6	0.384507	0.62447	no	AN3	miR779.1:AN3	0.999993
AT5G30510.1	miR167a-5p	616	6	1.65184	0.598358	no	ARRPS1	miR167a-5p:ARRPS1	0.999993
AT5G30510.1	miR169f-3p	850	6	2.27013	0.555016	no	ARRPS1	miR169f-3p:ARRPS1	0.999993
AT5G33320.1	miR394b-3p	556	6	0.407065	0.70544	no	ARAPPT	miR394b-3p:ARAPPT	0.999993
AT5G37300.1	miR2939	582	6	0.165082	0.487197	no	WSD1	miR2939:WSD1	0.999993
AT5G39320.1	miR5645a	1515	5.5	0.0748508	0.500303	no	UDG4	miR5645a:UDG4	0.999993
AT5G40950.1	miR841a-3p	261	5.5	0.0707493	0.332754	no	RPL27	miR841a-3p:RPL27	0.999993
AT5G43330.1	miR171c-5p	640	5.5	0.270693	0.500054	no	c-NAD-MDH2	miR171c-5p:c-NAD-MDH2	0.999993
AT5G43460.1	miR829-3p.2	770	5.5	0.0851043	0.514406	no	NA	miR829-3p.2:AT5G43460.1	0.999993
AT5G43940.2	miR839-5p	372	6	0.684936	0.593609	no	ADH2	miR839-5p:ADH2	0.999993
AT5G47210.3	miR771	816	6	0.0779268	0.539039	no	NA	miR771:AT5G47210.3	0.999993
AT5G49360.1	miR782	2163	5.5	0.0758761	0.539952	no	ATBXL1	miR782:ATBXL1	0.999993
AT5G50920.1	miR5663-5p	1022	6	0.345544	0.527383	no	ATHSP93-V	miR5663-5p:ATHSP93-V	0.999993
AT5G50920.1	miR838	2666	5.5	1.24273	0.473101	no	ATHSP93-V	miR838:ATHSP93-V	0.999993
AT5G51010.1	miR413	526	6	0.225578	0.541517	no	NA	miR413:AT5G51010.1	0.999993
AT5G53540.1	miR157a-5p	1201	6	0.235831	0.507639	no	NA	miR157a-5p:AT5G53540.1	0.999993
AT5G54160.1	miR5634	591	5.5	0.0851043	0.494689	no	ATOMT1	miR5634:ATOMT1	0.999993
AT5G55660.1	miR847	1804	6	0.0481916	0.600887	no	NA	miR847:AT5G55660.1	0.999993
AT5G57120.1	miR414	690	6	0.156879	0.478433	no	NA	miR414:AT5G57120.1	0.999993
AT5G60340.1	miR8173	583	5.5	0.223527	0.463898	no	AAK6	miR8173:AAK6	0.999993
AT5G60360.3	miR396b-5p	627	5.5	0.916665	0.416851	no	AALP	miR396b-5p:AALP	0.999993
AT5G60360.3	miR167a-5p	738	5.5	0.380406	0.391441	no	AALP	miR167a-5p:AALP	0.999993
AT5G60400.3	miR157c-3p	351	6	0.162006	0.577237	no	NA	miR157c-3p:AT5G60400.3	0.999993
AT5G62210.1	miR2112-5p	659	6	0.182513	0.29055	no	NA	miR2112-5p:AT5G62210.1	0.999993
AT5G62530.1	miR5017-5p	1483	6	0.290175	0.612218	no	ALDH12A1	miR5017-5p:ALDH12A1	0.999993
AT5G63530.2	miR4221	68	6	0.148676	0.525143	no	ATFP3	miR4221:ATFP3	0.999993
AT5G65140.2	miR8172	535	6	0.146625	0.666721	no	TPPJ	miR8172:TPPJ	0.999993
AT5G65670.2	miR5998a	817	6	0.518829	0.725307	no	IAA9	miR5998a:IAA9	0.999993

## Sheet: GSM280227
Target transcript	miRNA	miRNA slice site position in target transcript	Allen score of sRNA:target duplex	Slice site RPM	Slice site RPM + 1/Maximum adjacent site RPM + 1	Previously verified by 5' RACE?	Target gene common name	Interaction name	P-value adjusted for multiple testing
AT1G06580.1	miR400	1095	0	0.25792	1.25792	no	PPR1	miR400:PPR1	0
AT1G10120.1	miR396a-5p	1316	5.5	40.994	36.0046	yes	NA	miR396a-5p:AT1G10120.1	0
AT1G12520.3	miR398a-3p	820	6	264.453	202.194	no	ATCCS	miR398a-3p:ATCCS	0
AT1G12820.1	miR393a-5p	1894	4	40.765	35.6218	yes	AFB3	miR393a-5p:AFB3	0
AT1G17590.4	miR169h	1515	2.5	6.59908	5.41079	yes	NF-YA8	miR169h:NF-YA8	0
AT1G27340.1	miR394a	1382	1	7.98788	5.32846	yes	LCR	miR394a:LCR	0
AT1G27360.4	miR156j	1309	0	22.0605	14.36	no	SPL11	miR156j:SPL11	0
AT1G27370.4	miR156j	1324	0	48.7819	20.5638	no	SPL10	miR156j:SPL10	0
AT1G30210.2	miR319a	1022	2.5	27.0571	22.2235	yes	ATTCP24	miR319a:ATTCP24	0
AT1G30330.2	miR167a-5p	3246	5	6.81579	6.16837	no	ARF6	miR167a-5p:ARF6	0
AT1G30490.1	miR165a-3p	805	3	28.9145	12.826	no	ATHB9	miR165a-3p:ATHB9	0
AT1G31280.1	miR403-3p	3232	1	98.9343	67.629	yes	AGO2	miR403-3p:AGO2	0
AT1G33120.1	miR5630a	309	0	0.760023	0.636361	no	NA	miR5630a:AT1G33120.1	0
AT1G33140.1	miR5630a	309	0	0.378486	0.733008	no	PGY2	miR5630a:PGY2	0
AT1G48410.3	miR168a-5p	531	5	16.1436	10.5353	yes	AGO1	miR168a-5p:AGO1	0
AT1G50055.1	miR173-5p	373	4.5	86.3359	75.772	yes	TAS1b	miR173-5p:TAS1b	0
AT1G52150.3	miR166a-3p	1278	3	47.2542	19.4664	yes	ATHB-15	miR166a-3p:ATHB-15	0
AT1G53230.1	miR319c	1194	3.5	23.4615	21.0553	yes	TCP3	miR319c:TCP3	0
AT1G54160.1	miR169h	1294	1.5	6.37473	6.01592	yes	NF-YA5	miR169h:NF-YA5	0
AT1G56010.2	miR164a	812	2	10.1977	11.1977	yes	anac021	miR164a:anac021	0
AT1G63150.1	miR161.2	996	2.5	3.7467	3.12511	yes	NA	miR161.2:AT1G63150.1	0
AT1G66690.1	miR163	341	1	0.170929	1.17093	yes	NA	miR163:AT1G66690.1	0
AT1G66700.3	miR163	345	1	3.36822	4.36822	yes	PXMT1	miR163:PXMT1	0
AT1G66720.1	miR163	345	2	0.140406	1.14041	yes	NA	miR163:AT1G66720.1	0
AT1G69170.1	miR156j	1306	0	6.10155	7.10155	yes	SPL6	miR156j:SPL6	0
AT1G72230.1	miR408-3p	823	6	32.2277	28.0482	no	NA	miR408-3p:AT1G72230.1	0
AT1G72830.3	miR169h	1423	2.5	7.07371	6.68599	yes	ATHAP2C	miR169h:ATHAP2C	0
AT1G77850.1	miR160a-5p	1419	0.5	82.5968	83.5968	yes	ARF17	miR160a-5p:ARF17	0
AT2G02850.1	miR408-3p	107	1	15.0417	13.6289	yes	ARPN	miR408-3p:ARPN	0
AT2G22840.1	miR396a-5p	791	4	161.607	135.342	yes	AtGRF1	miR396a-5p:AtGRF1	0
AT2G27400.1	miR173-5p	378	2.5	76.7425	73.5872	yes	TAS1a	miR173-5p:TAS1a	0
AT2G28350.1	miR160a-5p	1339	2	81.498	60.5168	yes	ARF10	miR160a-5p:ARF10	0
AT2G28550.3	miR172a	1612	3	9.14623	10.1462	no	RAP2.7	miR172a:RAP2.7	0
AT2G29130.1	miR397a	739	1.5	1.6864	2.6864	yes	ATLAC2	miR397a:ATLAC2	0
AT2G31070.1	miR319c	1390	2.5	19.489	16.3276	yes	TCP10	miR319c:TCP10	0
AT2G33250.1	miR414	335	1	0.122092	0.935134	no	NA	miR414:AT2G33250.1	0
AT2G33400.1	miR414	658	1.5	0.0137354	0.884192	no	NA	miR414:AT2G33400.1	0
AT2G33770.1	miR399a	750	1.5	2.16713	3.16713	yes	ATUBC24	miR399a:ATUBC24	0
AT2G33770.1	miR399f	839	1	0.524996	1.525	yes	ATUBC24	miR399f:ATUBC24	0
AT2G33770.1	miR399e	896	1	0.270129	1.11824	yes	ATUBC24	miR399e:ATUBC24	0
AT2G33770.1	miR399a	953	1.5	0.306756	1.30676	yes	ATUBC24	miR399a:ATUBC24	0
AT2G33810.1	miR156a-5p	796	1.5	38.5887	20.5022	yes	SPL3	miR156a-5p:SPL3	0
AT2G34710.1	miR165a-3p	880	3	102.139	12.4202	yes	ATHB-14	miR165a-3p:ATHB-14	0
AT2G36400.1	miR396a-5p	756	4	11.115	11.5007	yes	AtGRF3	miR396a-5p:AtGRF3	0
AT2G39675.1	miR173-5p	378	2.5	558.353	297.677	yes	TAS1c	miR173-5p:TAS1c	0
AT2G39681.1	miR173-5p	417	2.5	264.249	156.827	yes	TAS2	miR173-5p:TAS2	0
AT2G42200.1	miR156j	946	0	0.70966	1.47353	no	AtSPL9	miR156j:AtSPL9	0
AT2G45160.1	miR171a-3p	1013	0	133.436	4.69673	yes	ATHAM1	miR171a-3p:ATHAM1	0
AT2G45480.1	miR396a-5p	524	4	29.354	22.7503	yes	AtGRF9	miR396a-5p:AtGRF9	0
AT2G47020.2	miR408-3p	1500	0	0.882115	1.43027	no	NA	miR408-3p:AT2G47020.2	0
AT2G47020.2	miR408-5p	1567	0	0.354067	0.84641	no	NA	miR408-5p:AT2G47020.2	0
AT3G14110.3	miR396b-5p	773	4.5	4.95999	4.94809	no	FLU	miR396b-5p:FLU	0
AT3G14560.1	miR824-5p	294	4.5	3.75891	4.01193	no	NA	miR824-5p:AT3G14560.1	0
AT3G15030.3	miR319c	1310	3	14.6266	12.7632	yes	MEE35	miR319c:MEE35	0
AT3G15170.1	miR164a	674	2.5	8.66701	8.39814	yes	ANAC054	miR164a:ANAC054	0
AT3G15640.2	miR398a-3p	105	3	10.0177	9.89968	yes	NA	miR398a-3p:AT3G15640.2	0
AT3G17185.2	miR390a-5p	863	4.5	953.33	309.526	yes	TAS3a	miR390a-5p:TAS3a	0
AT3G20910.1	miR169a-5p	1045	4	11.1424	10.7919	yes	NF-YA9	miR169a-5p:NF-YA9	0
AT3G22890.1	miR395a	452	3.5	2.16713	2.32848	yes	APS1	miR395a:APS1	0
AT3G25795.1	miR828	887	1	1.47579	2.17972	yes	TAS4	miR828:TAS4	0
AT3G26810.1	miR393a-5p	2009	4	6.85089	7.57349	yes	AFB2	miR393a-5p:AFB2	0
AT3G27200.1	miR398a-3p	268	5.5	76.2679	66.0747	no	NA	miR398a-3p:AT3G27200.1	0
AT3G44860.1	miR163	330	3	0.726448	1.72645	yes	FAMT	miR163:FAMT	0
AT3G49140.1	miR414	813	1.5	0.144984	0.834305	no	NA	miR414:AT3G49140.1	0
AT3G52910.1	miR396a-5p	752	4	5.33695	5.63212	yes	AtGRF4	miR396a-5p:AtGRF4	0
AT3G57230.2	miR824-5p	596	0.5	99.8515	51.6977	yes	AGL16	miR824-5p:AGL16	0
AT3G57920.1	miR156j	854	0	1.78102	2.42564	yes	SPL15	miR156j:SPL15	0
AT3G60250.2	miR397b	242	4	30.1934	27.6115	yes	CKB3	miR397b:CKB3	0
AT3G60630.1	miR171a-3p	1055	0	38.4682	2.79393	yes	ATHAM2	miR171a-3p:ATHAM2	0
AT3G62980.1	miR393a-5p	1721	2	23.5195	18.252	yes	AtTIR1	miR393a-5p:AtTIR1	0
AT4G00150.1	miR171a-3p	866	0	14.5503	4.25928	yes	ATHAM3	miR171a-3p:ATHAM3	0
AT4G03190.1	miR393a-5p	1597	3	13.8788	11.8281	yes	AFB1	miR393a-5p:AFB1	0
AT4G18390.2	miR319a	1136	2.5	32.0293	29.5561	yes	TCP2	miR319a:TCP2	0
AT4G24150.1	miR396a-5p	847	4	133.665	118.243	yes	AtGRF8	miR396a-5p:AtGRF8	0
AT4G29520.1	miR414	779	1.5	0.102252	0.69032	no	NA	miR414:AT4G29520.1	0
AT4G30080.1	miR160a-5p	1518	2.5	119.73	66.8565	yes	ARF16	miR160a-5p:ARF16	0
AT4G30760.2	miR5634	12	2	0.201452	0.0121934	no	NA	miR5634:AT4G30760.2	0
AT4G36920.2	miR172c	1303	1	50.3035	42.0601	yes	AP2	miR172c:AP2	0
AT4G37740.1	miR396a-5p	920	4	53.2001	54.2001	yes	AtGRF2	miR396a-5p:AtGRF2	0
AT4G38480.1	miR414	1416	1.5	0.134301	0.968719	no	NA	miR414:AT4G38480.1	0
AT5G06510.3	miR169d	1239	3	3.71923	3.86896	yes	NF-YA10	miR169d:NF-YA10	0
AT5G21930.3	miR408-3p	2211	6	5.62845	5.03715	no	ATHMA8	miR408-3p:ATHMA8	0
AT5G24890.1	miR414	772	1	0.213661	0.797441	no	NA	miR414:AT5G24890.1	0
AT5G27660.1	miR5657	1534	0	1.42237	0.262691	no	DEG14	miR5657:DEG14	0
AT5G37020.2	miR167a-5p	2380	4	38.1736	23.479	yes	ARF8	miR167a-5p:ARF8	0
AT5G39610.1	miR164c-5p	780	3	20.5389	18.6623	no	ANAC092	miR164c-5p:ANAC092	0
AT5G41170.1	miR161.2	891	3	16.1421	6.67694	yes	NA	miR161.2:AT5G41170.1	0
AT5G43270.3	miR156j	1111	0	18.2863	9.77172	yes	SPL2	miR156j:SPL2	0
AT5G43740.2	miR472-3p	642	1	0.276233	1.13892	yes	NA	miR472-3p:AT5G43740.2	0
AT5G50570.2	miR156j	976	0	4.32511	4.87159	no	SPL13	miR156j:SPL13	0
AT5G50670.1	miR156j	1111	0	4.32511	4.87159	no	SPL13	miR156j:SPL13	0
AT5G53660.1	miR396a-5p	539	4	6.66012	7.60211	yes	AtGRF7	miR396a-5p:AtGRF7	0
AT5G53950.1	miR164a	811	2.5	7.05235	6.85011	yes	ANAC098	miR164a:ANAC098	0
AT5G57735.1	miR390a-5p	428	4.5	9.05466	8.7932	yes	TAS3c	miR390a-5p:TAS3c	0
AT5G60020.1	miR397a	752	2.5	2.00994	3.00994	yes	ATLAC17	miR397a:ATLAC17	0
AT5G60120.2	miR172a	1820	1	92.5031	42.9571	yes	TOE2	miR172a:TOE2	0
AT5G60690.1	miR165a-3p	1272	3	12.6106	10.8068	yes	IFL	miR165a-3p:IFL	0
AT5G67180.1	miR172a	1308	3	26.3612	23.3976	yes	TOE3	miR172a:TOE3	0
AT5G07680.2	miR164a	661	2.5	3.13166	3.53775	yes	ANAC079	miR164a:ANAC079	0.000179577
AT5G61430.1	miR164a	850	2.5	4.42737	4.89677	yes	ANAC100	miR164a:ANAC100	0.000179577
AT5G49330.1	miR858a	385	3	5.62539	4.25094	yes	ATMYB111	miR858a:ATMYB111	0.000277672
AT2G38080.1	miR397a	759	2.5	0.782916	1.78292	yes	ATLMCO4	miR397a:ATLMCO4	0.000510387
AT1G06180.1	miR858a	402	3	2.77302	3.16046	yes	ATMYB13	miR858a:ATMYB13	0.000518901
AT2G22740.2	miR778	1185	1.5	0.337279	1.33728	yes	SDG23	miR778:SDG23	0.000612517
AT5G43060.1	miR396b-5p	518	3	3.60172	3.34937	no	RD21B	miR396b-5p:RD21B	0.000617817
AT1G63330.1	miR161.2	774	1	0.409009	1.30541	no	NA	miR161.2:AT1G63330.1	0.000629774
AT1G62670.1	miR161.1	978	2.5	1.44221	2.13581	no	RPF2	miR161.1:RPF2	0.000698121
AT1G69770.1	miR823	2036	2.5	3.24002	3.57909	yes	CMT3	miR823:CMT3	0.000911286
AT1G62590.1	miR161.2	1049	1	0.567728	1.2478	no	NA	miR161.2:AT1G62590.1	0.000981823
AT2G34010.1	miR159a	448	3	7.6506	6.5209	yes	TIE4	miR159a:TIE4	0.00125247
AT3G15270.1	miR156i	654	2	4.11756	4.10312	yes	SPL5	miR156i:SPL5	0.00125247
AT1G66230.1	miR858a	468	3	1.19345	2.01508	yes	AtMYB20	miR858a:AtMYB20	0.00135546
AT4G34060.2	miR402	265	3	0.52347	1.34309	no	DML3	miR402:DML3	0.00136612
AT2G39250.1	miR172e-3p	1054	2.5	1.04236	2.04236	yes	SNZ	miR172e-3p:SNZ	0.00145394
AT4G29900.1	miR391-5p	196	2.5	0.894325	1.89433	no	ACA10	miR391-5p:ACA10	0.00159741
AT5G43780.1	miR395a	405	1.5	0.34491	1.19695	yes	APS4	miR395a:APS4	0.00161145
AT4G32880.1	miR165a-3p	944	3	1.61009	2.61009	no	ATHB-8	miR165a-3p:ATHB-8	0.0021195
AT2G47460.1	miR858b	400	2.5	0.651667	1.37998	yes	ATMYB12	miR858b:ATMYB12	0.00220992
AT3G05690.1	miR169d	1194	3	1.78254	2.22552	yes	ATHAP2B	miR169d:ATHAP2B	0.00221442
AT3G11440.1	miR159a	1165	3.5	18.149	16.5916	yes	ATMYB65	miR159a:ATMYB65	0.00258205
AT5G06100.3	miR159a	1259	3.5	20.3054	15.9501	yes	ATMYB33	miR159a:ATMYB33	0.00258205
AT1G02860.2	miR827	268	1	0.552467	1.25085	yes	BAH1	miR827:BAH1	0.00290644
AT1G64583.1	miR161.1	738	2.5	0.985894	1.49871	no	NA	miR161.1:AT1G64583.1	0.0031008
AT1G62720.1	miR400	995	1	0.128197	1.1282	no	AtNG1	miR400:AtNG1	0.00315143
AT5G12840.4	miR169b-5p	1129	3	2.37469	2.66658	yes	ATHAP2A	miR169b-5p:ATHAP2A	0.00321872
AT1G06580.1	miR161.1	874	3.5	1.52463	1.97112	yes	PPR1	miR161.1:PPR1	0.00325598
AT2G34530.2	miR396b-5p	783	3.5	0.863802	1.8638	no	NA	miR396b-5p:AT2G34530.2	0.00481917
AT2G46800.2	miR856	435	2	0.314387	1.11093	no	ATCDF1	miR856:ATCDF1	0.00571918
AT1G62910.1	miR161.2	996	3	2.976	1.48596	yes	RFL9	miR161.2:RFL9	0.00595284
AT1G62930.1	miR161.2	984	3	2.976	1.48596	no	RPF3	miR161.2:RPF3	0.00595284
AT1G63130.1	miR161.2	1111	3	1.88327	1.35115	yes	TAS8	miR161.2:TAS8	0.00595284
AT3G24660.1	miR390a-5p	484	3.5	0.396799	1.2183	no	TMKL1	miR390a-5p:TMKL1	0.00769063
AT5G10180.1	miR395a	135	2.5	0.120566	1.12057	yes	AST68	miR395a:AST68	0.00769063
AT2G47940.2	miR1886.1	47	4	20.2383	2.72267	no	DEG2	miR1886.1:DEG2	0.00790804
AT4G15530.6	miR159b-3p	877	3	0.511261	1.25627	no	PPDK	miR159b-3p:PPDK	0.00825831
AT5G47040.1	miR414	929	2	0.122092	0.936325	no	LON2	miR414:LON2	0.00825831
AT4G19440.2	miR400	1248	2	0.117514	1.11751	no	NA	miR400:AT4G19440.2	0.00858375
AT4G26110.2	miR414	1111	2	0.405956	0.926577	no	ATNAP1;1	miR414:ATNAP1;1	0.00880842
AT3G07780.1	miR773a	1504	3.5	1.37048	1.49172	no	OBE1	miR773a:OBE1	0.00889532
AT1G53290.1	miR775	524	3.5	1.021	1.51128	yes	NA	miR775:AT1G53290.1	0.00972582
AT4G21400.1	miR866-3p	2174	2	0.422744	1.18119	no	CRK28	miR866-3p:CRK28	0.00984229
AT4G00760.1	miR2112-3p	2078	2	0.576885	1.01773	no	APRR8	miR2112-3p:APRR8	0.00988816
AT5G09860.2	miR414	476	2	0.184664	0.89507	no	AtHPR1	miR414:AtHPR1	0.0107509
AT3G62610.1	miR858a	300	3.5	0.521944	1.33814	no	ATMYB11	miR858a:ATMYB11	0.0114734
AT5G01430.2	miR5021	59	3	2.58377	2.15387	no	NA	miR5021:AT5G01430.2	0.0115539
AT5G55840.1	miR161.2	1128	4.5	1.27586	1.97452	no	NA	miR161.2:AT5G55840.1	0.0158596
AT1G51760.1	miR167a-5p	862	3	0.521944	1.20115	no	IAR3	miR167a-5p:IAR3	0.0178031
AT5G24660.1	miR396b-5p	158	3.5	0.616565	1.2898	yes	LSU2	miR396b-5p:LSU2	0.0188542
AT2G20280.1	miR414	1015	2	0.16635	0.809371	no	NA	miR414:AT2G20280.1	0.0205292
AT1G71030.1	miR858a	342	4.5	1.15682	1.77266	no	ATMYBL2	miR858a:ATMYBL2	0.0221927
AT1G63400.1	miR161.2	999	2	0.930952	1.04029	yes	NA	miR161.2:AT1G63400.1	0.0222749
AT1G63800.1	miR414	594	2	0.152615	0.687683	no	UBC5	miR414:UBC5	0.0225551
AT1G47970.1	miR414	401	2	0.148037	0.670901	no	NA	miR414:AT1G47970.1	0.0230527
AT1G66880.1	miR5650	3556	2	0.195347	1	no	NA	miR5650:AT1G66880.1	0.0230527
AT5G23420.2	miR414	390	2	0.152615	0.590383	no	HMGB6	miR414:HMGB6	0.0257167
AT3G09220.1	miR857	156	3	0.128197	1.1282	no	LAC7	miR857:LAC7	0.0286553
AT5G09670.2	miR394a	987	3	0.195347	1.19535	no	NA	miR394a:AT5G09670.2	0.0305821
AT5G09672.1	miR394a	987	3	0.195347	1.19535	no	CPuORF21	miR394a:CPuORF21	0.0305821
AT4G33240.3	miR414	1389	3	0.108357	1.10836	no	FAB1A	miR414:FAB1A	0.0330221
AT3G48610.1	miR166a-3p	1620	5	1.66198	2.08581	no	NPC6	miR166a-3p:NPC6	0.0340131
AT1G43060.1	miR1886.1	12632	2.5	0.102252	1.10225	no	NA	miR1886.1:AT1G43060.1	0.0376013
AT1G53910.3	miR396a-5p	591	6	8.26716	4.62738	no	RAP2.12	miR396a-5p:RAP2.12	0.0381297
AT1G62914.1	miR161.2	978	3	0.27776	1.12345	no	NA	miR161.2:AT1G62914.1	0.0425705
AT3G23690.1	miR393a-5p	416	3	0.395273	1.18235	yes	NA	miR393a-5p:AT3G23690.1	0.0431667
AT4G27310.1	miR414	636	2.5	0.111409	0.905501	no	BBX28	miR414:BBX28	0.0435041
AT1G64880.1	miR414	933	2.5	0.0930952	0.961086	no	NA	miR414:AT1G64880.1	0.0443961
AT5G37420.1	miR414	1693	2.5	0.0228923	0.961276	no	NA	miR414:AT5G37420.1	0.0443961
AT1G73850.1	miR414	665	2.5	0.157194	0.901337	no	NA	miR414:AT1G73850.1	0.0447271
AT1G66620.1	miR414	1013	2.5	0.143458	0.95294	no	NA	miR414:AT1G66620.1	0.0466519
AT2G16900.3	miR414	965	2.5	0.0976737	0.889885	no	NA	miR414:AT2G16900.3	0.0470025
AT3G56050.2	miR831-3p	1524	4	0.459372	1.17584	no	NA	miR831-3p:AT3G56050.2	0.0470025
AT3G55940.1	miR414	901	2.5	0.0213661	0.886129	no	NA	miR414:AT3G55940.1	0.0478851
AT4G19100.1	miR414	345	2.5	0.141932	0.881071	no	PAM68	miR414:PAM68	0.0491075
AT2G47590.1	miR156i	304	3	0.450215	1.17569	no	PHR2	miR156i:PHR2	0.0492182
AT1G03530.1	miR414	1032	2.5	0.0213661	0.870002	no	ATNAF1	miR414:ATNAF1	0.0514884
AT2G34970.1	miR414	2194	2.5	0.0030523	0.865655	no	NA	miR414:AT2G34970.1	0.05152
AT5G63740.1	miR414	295	2.5	0.126671	0.867253	no	NA	miR414:AT5G63740.1	0.05152
AT1G03530.1	miR414	1026	2.5	0.0137354	0.863502	no	ATNAF1	miR414:ATNAF1	0.0516856
AT1G63980.2	miR414	889	2.5	0.143458	0.938615	no	NA	miR414:AT1G63980.2	0.05247
AT3G18520.2	miR414	382	2.5	0.123618	0.935217	no	ATHDA15	miR414:ATHDA15	0.0532127
AT4G31610.1	miR414	595	2.5	0.106831	0.931898	no	ATREM1	miR414:ATREM1	0.053725
AT2G32250.4	miR775	2733	4	0.448689	1.21973	no	FRS2	miR775:FRS2	0.0537902
AT2G41720.2	miR161.2	962	4.5	0.618091	1.27703	no	EMB2654	miR161.2:EMB2654	0.0537902
AT2G32810.2	miR857	1117	4.5	0.76918	1.4688	no	BGAL9	miR857:BGAL9	0.0557205
AT1G58210.1	miR414	667	2.5	0.0396799	0.922789	no	EMB1674	miR414:EMB1674	0.0561303
AT1G54440.2	miR414	1932	2.5	0.129723	0.829643	no	NA	miR414:AT1G54440.2	0.0594692
AT5G23480.1	miR781a	1247	3	0.151089	1.0148	no	NA	miR781a:AT5G23480.1	0.0605604
AT5G44200.2	miR414	905	3.5	0.648614	1.10427	no	ATCBP20	miR414:ATCBP20	0.0605604
AT5G43780.1	miR5661	935	3	0.193821	1.00643	no	APS4	miR5661:APS4	0.0610514
AT5G65670.2	miR172b-5p	1057	3.5	1.63909	1.24117	no	IAA9	miR172b-5p:IAA9	0.0614571
AT3G28030.1	miR414	3963	2.5	0.128197	0.813927	no	UVH3	miR414:UVH3	0.0618066
AT4G08870.2	miR2938	778	2.5	0.210609	0.840974	no	ARGAH2	miR2938:ARGAH2	0.0626802
AT3G56150.2	miR414	688	2.5	0.0381538	0.800057	no	ATEIF3C-1	miR414:ATEIF3C-1	0.0643004
AT3G25910.1	miR414	1319	2.5	0.239606	0.796127	no	NA	miR414:AT3G25910.1	0.0650588
AT3G18390.1	miR414	2524	2.5	0.129723	0.865536	no	EMB1865	miR414:EMB1865	0.0671173
AT3G24770.1	miR5021	114	5	1.66045	2.22283	no	CLE41	miR5021:CLE41	0.0684993
AT3G06370.1	miR398b-3p	2030	4.5	0.244184	1.24418	no	ATNHX4	miR398b-3p:ATNHX4	0.0715495
AT5G08620.1	miR157d	1433	2.5	0.128197	0.997302	no	ATRH25	miR157d:ATRH25	0.0751478
AT3G28970.1	miR5025	672	5	0.952318	1.51705	no	AAR3	miR5025:AAR3	0.0781484
AT5G45950.1	miR159a	876	3.5	0.972158	1.16393	no	NA	miR159a:AT5G45950.1	0.0790905
AT3G61250.1	miR858a	604	4	0.467002	1.13859	no	AtMYB17	miR858a:AtMYB17	0.0824966
AT1G04530.1	miR414	809	2.5	0.505156	0.683826	no	TPR4	miR414:TPR4	0.0843685
AT1G47970.1	miR414	371	2.5	0.132775	0.685837	no	NA	miR414:AT1G47970.1	0.0843685
AT1G05090.1	miR5638a	964	2.5	0.0167877	0.907388	no	NA	miR5638a:AT1G05090.1	0.0859561
AT4G20720.1	miR5638a	1124	2.5	0.0167877	0.907388	no	NA	miR5638a:AT4G20720.1	0.0859561
AT4G00450.1	miR5633	6797	3	0.254867	1.09597	no	CCT	miR5633:CCT	0.0900828
AT1G70700.2	miR169d	787	2.5	0.167877	0.674079	no	JAZ9	miR169d:JAZ9	0.091214
AT5G13630.2	miR395a	3577	2.5	0.550941	0.807027	no	ABAR	miR395a:ABAR	0.0920703
AT5G37780.3	miR414	638	2.5	1.08815	0.614599	no	ACAM-1	miR414:ACAM-1	0.0924501
AT4G30720.1	miR414	2193	2.5	0.129723	0.591134	no	PDE327	miR414:PDE327	0.0949984
AT5G49400.1	miR414	565	2.5	0.108357	0.573995	no	NA	miR414:AT5G49400.1	0.0959881
AT5G17580.1	miR415	1674	3	1.12935	1.0364	no	NA	miR415:AT5G17580.1	0.0967275
AT1G48380.2	miR396a-5p	1173	6	1.15988	1.60415	no	HYP7	miR396a-5p:HYP7	0.0998118
AT5G40910.1	miR5648-3p	2182	4	0.15872	1.15872	no	NA	miR5648-3p:AT5G40910.1	0.102803
AT5G55920.1	miR414	1841	2.5	0.167877	0.477906	no	OLI2	miR414:OLI2	0.102803
AT4G32250.3	miR396a-5p	1759	5	1.04389	1.31525	no	NA	miR396a-5p:AT4G32250.3	0.102846
AT4G17330.1	miR397b	1442	4.5	0.262498	1.2625	no	ATG2484-1	miR397b:ATG2484-1	0.103542
AT4G27120.2	miR414	350	3	0.88822	0.967168	no	NA	miR414:AT4G27120.2	0.104425
AT1G10570.2	miR831-3p	57	5	1.15682	1.3691	no	OTS2	miR831-3p:OTS2	0.104807
AT5G35715.1	miR847	444	4	0.184664	1.17569	no	CYP71B8	miR847:CYP71B8	0.106455
AT4G36648.1	miR414	289	4	3.70092	1.18688	no	NA	miR414:AT4G36648.1	0.107939
AT4G21510.1	miR403-3p	379	4	0.317439	1.13102	no	AtFBS2	miR403-3p:AtFBS2	0.111552
AT4G36900.1	miR5658	614	2.5	0.0427322	0.892844	no	DEAR4	miR5658:DEAR4	0.11213
AT5G20190.1	miR414	448	3.5	0.328123	1.11535	no	NA	miR414:AT5G20190.1	0.113187
AT4G02780.1	miR169g-3p	1978	4.5	0.161772	1.16177	no	ABC33	miR169g-3p:ABC33	0.118141
AT4G00755.2	miR8172	150	3	0.149563	0.962927	no	NA	miR8172:AT4G00755.2	0.118556
AT1G11440.1	miR172d-5p	221	3	0.0991998	0.947385	no	NA	miR172d-5p:AT1G11440.1	0.11889
AT5G01881.1	miR838	13	5	0.25792	1.21347	no	NA	miR838:AT5G01881.1	0.121556
AT1G77320.2	miR837-5p	2539	5.5	0.633353	1.42274	no	MEI1	miR837-5p:MEI1	0.124605
AT3G15790.1	miR156i	881	4.5	0.892799	1.43673	no	ATMBD11	miR156i:ATMBD11	0.124605
AT3G01500.3	miR5658	1175	2	1.1263	0.925593	no	ATBCA1	miR5658:ATBCA1	0.125491
AT1G69670.1	miR858a	1751	4.5	0.228923	1.22892	no	ATCUL3B	miR858a:ATCUL3B	0.125527
AT3G14770.1	miR172a	1276	3.5	0.228923	1.02286	no	AtSWEET2	miR172a:AtSWEET2	0.127392
AT5G62690.1	miR774a	179	5	0.314387	1.24413	no	TUB2	miR774a:TUB2	0.12817
AT4G27330.1	miR159a	547	4.5	0.389169	1.21488	no	NZZ	miR159a:NZZ	0.133143
AT1G06950.1	miR414	2122	3	0.129723	0.942693	no	ATTIC110	miR414:ATTIC110	0.133206
AT4G12350.1	miR858b	299	4	0.164824	1.156	no	AtMYB42	miR858b:AtMYB42	0.133221
AT1G50890.1	miR780.1	2553	4	0.315913	1.07748	no	NA	miR780.1:AT1G50890.1	0.1349
AT2G02810.1	miR407	1239	2.5	0.114461	0.91942	no	ATUTR1	miR407:ATUTR1	0.135286
AT1G45160.2	miR5658	87	3	0.123618	1.03661	no	NA	miR5658:AT1G45160.2	0.136391
AT1G12880.1	miR408-3p	824	5	0.544836	1.30235	no	atnudt12	miR408-3p:atnudt12	0.140319
AT3G56860.5	miR414	332	3.5	0.148037	0.992087	no	UBA2A	miR414:UBA2A	0.142439
AT5G15540.2	miR414	1189	3.5	0.129723	0.993291	no	ATSCC2	miR414:ATSCC2	0.142439
AT1G70620.3	miR865-3p	1317	6	0.807334	1.36868	no	NA	miR865-3p:AT1G70620.3	0.148621
AT2G31380.1	miR5021	43	6	1.73829	1.59738	no	BBX25	miR5021:BBX25	0.153074
AT2G06050.3	miR844-3p	988	3	0.122092	0.918775	no	AtOPR3	miR844-3p:AtOPR3	0.153145
AT5G07580.1	miR5658	450	3	0.129723	0.957323	no	NA	miR5658:AT5G07580.1	0.155817
AT2G20340.1	miR862-3p	899	4	0.267076	1.08352	no	AAS	miR862-3p:AAS	0.159837
AT4G40070.1	miR169g-3p	992	4.5	0.123618	1.12362	no	NA	miR169g-3p:AT4G40070.1	0.160069
AT5G63950.1	miR414	1046	4	0.181612	1.05592	no	CHR24	miR414:CHR24	0.16106
AT1G53720.1	miR847	1311	3	0.187717	0.948796	no	ATCYP59	miR847:ATCYP59	0.161363
AT4G38170.1	miR172a	974	6	0.575359	1.57536	no	FRS9	miR172a:FRS9	0.163551
AT5G03170.1	miR5641	59	3	0.108357	0.973199	no	ATFLA11	miR5641:ATFLA11	0.163683
AT2G04842.1	miR850	1664	6	1.31859	1.31851	no	EMB2761	miR850:EMB2761	0.163746
AT3G23900.3	miR5021	11	2	0.0976737	0.85093	no	NA	miR5021:AT3G23900.3	0.166337
AT5G61440.1	miR396b-5p	718	5	0.528048	1.31011	no	ACHT5	miR396b-5p:ACHT5	0.166688
AT1G63130.1	miR161.1	1102	2.5	0.373907	0.47651	yes	TAS8	miR161.1:TAS8	0.169552
AT2G16730.1	miR2938	140	5	0.167877	1.16788	no	BGAL13	miR2938:BGAL13	0.169552
AT2G22230.1	miR5658	117	2	0.149563	0.711787	no	NA	miR5658:AT2G22230.1	0.169779
AT2G33490.1	miR5024-3p	834	3	0.122092	0.856684	no	NA	miR5024-3p:AT2G33490.1	0.170695
AT3G16620.1	miR172d-5p	2998	4.5	0.355593	1.20156	no	ATTOC120	miR172d-5p:ATTOC120	0.172559
AT1G32490.2	miR414	535	3.5	0.109883	0.971934	no	EMB2733	miR414:EMB2733	0.172695
AT5G23250.2	miR171b-3p	1102	3.5	0.140406	1.01219	no	NA	miR171b-3p:AT5G23250.2	0.173202
AT1G21550.1	miR165a-5p	270	5	0.30523	1.17278	no	NA	miR165a-5p:AT1G21550.1	0.173451
AT4G29160.3	miR773a	207	5	0.373907	1.1826	no	SNF7.1	miR773a:SNF7.1	0.173451
AT1G62910.1	miR161.1	987	2.5	0.552467	0.39046	yes	RFL9	miR161.1:RFL9	0.173957
AT1G62930.1	miR161.1	975	2.5	0.552467	0.39046	no	RPF3	miR161.1:RPF3	0.173957
AT2G48070.3	miR854a	195	3	0.210609	0.896074	no	RPH1	miR854a:RPH1	0.179245
AT2G38790.1	miR5641	1038	5	0.196874	1.19687	no	NA	miR5641:AT2G38790.1	0.181422
AT3G20770.1	miR5021	79	2	0.00152615	0.819031	no	AtEIN3	miR5021:AtEIN3	0.181422
AT1G80000.2	miR414	363	3.5	0.132775	0.963648	no	NA	miR414:AT1G80000.2	0.182592
AT1G09730.2	miR838	1770	4	0.212135	1.01925	no	NA	miR838:AT1G09730.2	0.183278
AT3G52940.2	miR2112-5p	1440	4.5	0.233501	1.2335	no	ELL1	miR2112-5p:ELL1	0.183386
AT1G05090.1	miR5638a	901	3	0.0366276	0.92008	no	NA	miR5638a:AT1G05090.1	0.186941
AT4G20720.1	miR5638a	1061	3	0.0366276	0.92008	no	NA	miR5638a:AT4G20720.1	0.186941
AT4G23680.1	miR5658	557	2	0.276233	0.627225	no	NA	miR5658:AT4G23680.1	0.186941
AT5G56510.1	miR779.1	1538	6	0.334227	1.33423	no	APUM12	miR779.1:APUM12	0.186941
AT5G58782.1	miR415	958	4	0.398326	1.09045	no	AtcPT6	miR415:AtcPT6	0.186941
AT5G14050.1	miR414	455	4	0.131249	1.13125	no	NA	miR414:AT5G14050.1	0.187022
AT4G08580.1	miR414	459	3	0.137354	0.864308	no	NA	miR414:AT4G08580.1	0.189914
AT3G55630.3	miR397b	792	6	1.22397	1.61513	no	ATDFD	miR397b:ATDFD	0.191225
AT1G61260.1	miR414	324	3.5	0.151089	1.0148	no	NA	miR414:AT1G61260.1	0.194853
AT5G53440.1	miR414	3427	3	0.122092	0.933947	no	NA	miR414:AT5G53440.1	0.197199
AT1G23240.3	miR5021	569	3.5	0.547888	1.17085	no	NA	miR5021:AT1G23240.3	0.200629
AT5G63020.1	miR846-5p	2566	3.5	0.122092	1.00823	no	NA	miR846-5p:AT5G63020.1	0.200629
AT5G24520.3	miR5645c	1250	5	0.479212	1.22187	no	ATTTG1	miR5645c:ATTTG1	0.209441
AT4G22350.2	miR414	581	4	0.17856	1.01846	no	NA	miR414:AT4G22350.2	0.211082
AT5G18420.3	miR397a	1070	3.5	0.163298	0.984501	no	NA	miR397a:AT5G18420.3	0.213861
AT3G50690.1	miR414	508	3	0.154141	0.90759	no	NA	miR414:AT3G50690.1	0.214929
AT1G15170.1	miR413	1161	5.5	0.415113	1.2663	no	NA	miR413:AT1G15170.1	0.218077
AT1G48500.2	miR169h	974	4	0.163298	1.0901	no	JAZ4	miR169h:JAZ4	0.218077
AT4G12610.2	miR414	898	3	0.112935	0.90003	no	ATRAP74	miR414:ATRAP74	0.21831
AT1G62680.1	miR5658	1933	2	0.380012	0.58179	no	NA	miR5658:AT1G62680.1	0.22024
AT5G01880.1	miR838	952	5	0.25792	1.21347	no	NA	miR838:AT5G01880.1	0.22067
AT3G23750.1	miR838	2602	5.5	0.454793	1.1794	no	NA	miR838:AT3G23750.1	0.22106
AT4G23800.2	miR1886.1	35	6	1.37811	1.66792	no	3xHMG-box2	miR1886.1:3xHMG-box2	0.222938
AT2G24500.1	miR414	904	3.5	0.2976	0.938207	no	FZF	miR414:FZF	0.22874
AT3G48900.2	miR835-5p	1764	3	0.0930952	0.724031	no	NA	miR835-5p:AT3G48900.2	0.229864
AT3G56450.1	miR5663-5p	851	4.5	0.950792	1.08395	no	ALPHA-SNAP1	miR5663-5p:ALPHA-SNAP1	0.23
AT2G31170.2	miR779.2	684	3.5	0.163298	0.903942	no	FIONA	miR779.2:FIONA	0.230571
AT5G64640.1	miR156a-5p	1370	5	0.459372	1.19345	no	NA	miR156a-5p:AT5G64640.1	0.232174
AT3G56150.2	miR414	682	3	0.0457845	0.805937	no	ATEIF3C-1	miR414:ATEIF3C-1	0.233754
AT4G30190.2	miR773b-3p	1307	3.5	0.169403	0.901205	no	AHA2	miR773b-3p:AHA2	0.236392
AT5G54810.1	miR5642a	470	4	0.180086	1.0887	no	ATTSB1	miR5642a:ATTSB1	0.238045
AT1G62680.1	miR5658	1915	2.5	0.0595199	0.446676	no	NA	miR5658:AT1G62680.1	0.238458
AT3G06130.2	miR414	855	3	0.128197	0.797249	no	NA	miR414:AT3G06130.2	0.238458
AT1G09200.1	miR4221	102	6	0.819543	1.35599	no	NA	miR4221:AT1G09200.1	0.238593
AT2G18960.1	miR773b-3p	1396	4	0.231975	1.07454	no	AHA1	miR773b-3p:AHA1	0.244144
AT2G23910.1	miR835-5p	404	4	0.149563	1.05608	no	NA	miR835-5p:AT2G23910.1	0.245404
AT3G24760.1	miR414	906	3	0.13888	0.8497	no	NA	miR414:AT3G24760.1	0.250839
AT4G16442.1	miR5021	763	4	0.471581	1.19449	no	NA	miR5021:AT4G16442.1	0.250839
AT4G32590.4	miR5021	211	2	0.129723	0.66375	no	NA	miR5021:AT4G32590.4	0.251163
AT1G24440.1	miR5658	265	4.5	0.170929	1.17093	no	NA	miR5658:AT1G24440.1	0.251674
AT2G11910.2	miR414	313	3	0.850066	0.773487	no	NA	miR414:AT2G11910.2	0.251844
AT3G01040.2	miR396a-5p	1286	4	0.184664	1.01173	no	GAUT13	miR396a-5p:GAUT13	0.254031
AT2G22980.4	miR846-5p	1289	5.5	0.700503	1.26297	no	SCPL13	miR846-5p:SCPL13	0.265887
AT4G09000.2	miR5021	130	3	0.375433	1.06499	no	GF14 CHI	miR5021:GF14 CHI	0.267905
AT2G01290.1	miR5021	27	2	0.157194	0.606962	no	RPI2	miR5021:RPI2	0.2696
AT3G02940.1	miR858a	389	5	0.115988	1.10586	no	AtMYB107	miR858a:AtMYB107	0.274872
AT2G43060.1	miR5658	553	4	0.11904	1.11057	no	IBH1	miR5658:IBH1	0.27953
AT1G52827.1	miR1887	256	3.5	0.410535	0.945766	no	ATCDT1	miR1887:ATCDT1	0.281789
AT4G13495.2	miR863-3p	755	3	0.117514	0.819758	no	NA	miR863-3p:AT4G13495.2	0.281789
AT3G05220.2	miR414	638	3	0.132775	0.716974	no	NA	miR414:AT3G05220.2	0.285559
AT3G23400.1	miR5021	28	3	0.189243	0.974976	no	FIB4	miR5021:FIB4	0.285559
AT1G63910.1	miR858a	449	5.5	0.15872	1.14821	no	AtMYB103	miR858a:AtMYB103	0.286682
AT4G02940.1	miR415	1936	3	0.173981	0.876887	no	NA	miR415:AT4G02940.1	0.286682
AT3G26300.1	miR837-5p	454	4.5	0.256393	1.04176	no	CYP71B34	miR837-5p:CYP71B34	0.287649
AT4G35890.1	miR5658	789	4.5	0.222818	1.08387	no	AtLARP1c	miR5658:AtLARP1c	0.287649
AT3G52180.2	miR5021	222	4	0.308283	1.10577	no	ATPTPKIS1	miR5021:ATPTPKIS1	0.287758
AT1G21560.3	miR414	442	3.5	0.125144	0.886916	no	NA	miR414:AT1G21560.3	0.289926
AT4G31850.1	miR161.1	879	5.5	0.215187	1.21519	no	PGR3	miR161.1:PGR3	0.291074
AT1G35910.1	miR390b-3p	841	6	0.352541	1.18602	no	TPPD	miR390b-3p:TPPD	0.291473
AT2G44270.2	miR866-5p	701	6	0.824122	1.42589	no	ROL5	miR866-5p:ROL5	0.293801
AT5G18570.1	miR414	470	4.5	0.199926	1.03284	no	ATOBGC	miR414:ATOBGC	0.293801
AT3G20050.1	miR5645a	1735	4.5	0.74171	1.05549	no	ATTCP-1	miR5645a:ATTCP-1	0.296122
AT4G38480.1	miR414	1407	3.5	0.0610461	0.879784	no	NA	miR414:AT4G38480.1	0.296122
AT4G36980.4	miR414	639	3	0.164824	0.749568	no	NA	miR414:AT4G36980.4	0.298571
AT2G16580.1	miR1888a	246	4	0.112935	1.11294	no	NA	miR1888a:AT2G16580.1	0.299367
AT3G23930.1	miR156a-3p	429	4	0.129723	0.956086	no	NA	miR156a-3p:AT3G23930.1	0.300873
AT2G19540.1	miR414	429	4	0.213661	0.974273	no	NA	miR414:AT2G19540.1	0.303417
AT3G50050.1	miR5012	607	4	0.154141	1.02161	no	NA	miR5012:AT3G50050.1	0.307614
AT5G41340.1	miR414	697	3	0.173981	0.631955	no	ATUBC4	miR414:ATUBC4	0.309511
AT3G13200.1	miR414	505	3	0.224344	0.717414	no	EMB2769	miR414:EMB2769	0.310847
AT3G50000.1	miR5021	1267	2.5	0.141932	0.81221	no	ATCKA2	miR5021:ATCKA2	0.311663
AT4G09730.1	miR399d	1928	3.5	0.141932	0.874889	no	RH39	miR399d:RH39	0.311663
AT4G17570.3	miR414	720	5	0.164824	1.16482	no	GATA26	miR414:GATA26	0.311828
AT3G06868.1	miR5021	305	5	0.149563	1.14956	no	NA	miR5021:AT3G06868.1	0.313926
AT3G17880.2	miR414	315	5.5	0.387642	1.13479	no	ATHIP2	miR414:ATHIP2	0.316242
AT5G07870.1	miR396b-5p	1413	5	0.227397	1.09983	no	NA	miR396b-5p:AT5G07870.1	0.317916
AT1G12220.2	miR5025	1855	5.5	0.189243	1.18924	no	RPS5	miR5025:RPS5	0.321203
AT2G42830.2	miR159b-5p	594	4	0.164824	1.02141	no	AGL5	miR159b-5p:AGL5	0.321336
AT1G13220.2	miR414	3310	3.5	0.128197	0.85339	no	CRWN2	miR414:CRWN2	0.323454
AT4G09460.1	miR858a	353	4	0.135827	0.960012	no	AtMYB6	miR858a:AtMYB6	0.323454
AT4G31980.1	miR832-3p	1074	5	0.175507	1.17551	no	NA	miR832-3p:AT4G31980.1	0.324015
AT3G20150.1	miR838	3258	4	0.187717	1.00908	no	NA	miR838:AT3G20150.1	0.325528
AT2G42790.1	miR5021	24	4	0.601304	1.15144	no	CSY3	miR5021:CSY3	0.329105
AT5G58150.1	miR5021	305	6	0.213661	1.21366	no	NA	miR5021:AT5G58150.1	0.337175
AT5G46030.1	miR414	453	3	0.46395	0.505066	no	NA	miR414:AT5G46030.1	0.337691
AT2G11910.2	miR414	502	3	0.140406	0.489277	no	NA	miR414:AT2G11910.2	0.339528
AT2G34900.2	miR865-3p	639	3	0.141932	0.641584	no	GTE01	miR865-3p:GTE01	0.339528
AT4G37650.1	miR5021	284	2	0.369329	0.160502	no	SGR7	miR5021:SGR7	0.340016
AT4G31990.4	miR869.2	1822	5	0.15872	1.15872	no	AAT3	miR869.2:AAT3	0.341162
AT4G27950.1	miR164a	386	5	0.0976737	1.09767	no	CRF4	miR164a:CRF4	0.341946
AT2G04842.1	miR5021	35	5	0.660824	1.22379	no	EMB2761	miR5021:EMB2761	0.342615
AT4G19610.1	miR5021	59	3	0.13888	1.01221	no	NA	miR5021:AT4G19610.1	0.342615
AT4G00340.1	miR824-3p	2066	4	0.129723	0.941494	no	RLK4	miR824-3p:RLK4	0.344049
AT3G11030.1	miR1886.1	199	3.5	0.167877	0.972055	no	TBL32	miR1886.1:TBL32	0.345038
AT5G10070.2	miR414	830	3.5	0.115988	0.831674	no	NA	miR414:AT5G10070.2	0.347357
AT5G08185.4	miR162a-3p	231	5	0.506682	1.07164	no	MIR162A	miR162a-3p:MIR162A	0.348887
AT3G05530.1	miR5641	1555	4.5	0.593673	1.05347	no	ATS6A.2	miR5641:ATS6A.2	0.350468
AT5G08330.1	miR5021	34	3	0.106831	0.937924	no	AtTCP11	miR5021:AtTCP11	0.351279
AT2G04660.1	miR833b	2158	5.5	0.129723	1.12972	no	APC2	miR833b:APC2	0.351369
AT1G78420.2	miR166e-5p	993	4	0.131249	0.9488	no	NA	miR166e-5p:AT1G78420.2	0.357898
AT3G25740.1	miR5998a	1120	3.5	0.137354	0.810714	no	MAP1B	miR5998a:MAP1B	0.35892
AT1G67230.1	miR837-5p	1211	3.5	0.236553	0.804416	no	CRWN1	miR837-5p:CRWN1	0.3611
AT5G08280.1	miR397b	652	3.5	0.340332	0.764193	no	HEMC	miR397b:HEMC	0.3611
AT5G41990.1	miR5658	22	3	0.129723	0.639109	no	ATWNK8	miR5658:ATWNK8	0.3611
AT5G41992.1	miR5658	22	3	0.129723	0.639109	no	CPuORF58	miR5658:CPuORF58	0.3611
AT5G19680.1	miR780.2	380	4.5	0.167877	0.998695	no	NA	miR780.2:AT5G19680.1	0.362639
AT2G38760.1	miR5024-5p	1095	6	0.383064	1.18271	no	ANN3	miR5024-5p:ANN3	0.363906
AT5G06680.1	miR5646	818	5.5	0.338806	1.1345	no	ATGCP3	miR5646:ATGCP3	0.365228
AT5G55920.1	miR414	281	3.5	0.149563	0.801968	no	OLI2	miR414:OLI2	0.370608
AT1G43710.1	miR865-3p	777	3.5	0.0869906	0.909352	no	ATSDC1	miR865-3p:ATSDC1	0.370976
AT1G48090.1	miR319c	6908	5	0.129723	1.12972	no	NA	miR319c:AT1G48090.1	0.370976
AT3G13340.2	miR161.1	1285	4.5	0.106831	1.10683	no	NA	miR161.1:AT3G13340.2	0.370976
AT4G32300.1	miR156i	33	5	0.1984	1.19657	no	SD2-5	miR156i:SD2-5	0.370976
AT5G63180.1	miR416	859	5	0.293021	1.06272	no	NA	miR416:AT5G63180.1	0.37626
AT5G59000.1	miR414	761	3.5	0.0137354	0.792423	no	NA	miR414:AT5G59000.1	0.380043
AT1G23860.4	miR164c-5p	1050	5	0.338806	1.08003	no	At-RSZ21	miR164c-5p:At-RSZ21	0.381218
AT2G46680.2	miR865-3p	796	3.5	0.0946214	0.897403	no	ATHB-7	miR865-3p:ATHB-7	0.381997
AT3G44280.1	miR5655	295	5	0.181612	1.18161	no	NA	miR5655:AT3G44280.1	0.381997
AT2G17930.1	miR169b-5p	7361	5	0.105304	1.1053	no	NA	miR169b-5p:AT2G17930.1	0.38544
AT2G25430.1	miR825	2300	3.5	0.123618	0.840227	no	NA	miR825:AT2G25430.1	0.386155
AT3G48430.1	miR414	3190	5	0.210609	1.04893	no	JMJ12	miR414:JMJ12	0.386155
AT1G61010.3	miR156f-3p	2048	4	0.151089	0.944879	no	CPSF73-I	miR156f-3p:CPSF73-I	0.387411
AT3G05040.1	miR169a-5p	3343	5	0.0915691	1.09157	no	HST	miR169a-5p:HST	0.387411
AT3G18240.2	miR5645a	684	4.5	0.172455	1.0013	no	NA	miR5645a:AT3G18240.2	0.388884
AT3G50690.1	miR414	652	3.5	0.117514	0.773843	no	NA	miR414:AT3G50690.1	0.389189
AT5G61210.1	miR5021	118	3	0.224344	0.90624	no	ATSNAP33	miR5021:ATSNAP33	0.392103
AT2G24500.1	miR774b-3p	561	5	0.363224	1.13899	no	FZF	miR774b-3p:FZF	0.393826
AT4G30190.2	miR837-5p	566	5.5	0.117514	1.11751	no	AHA2	miR837-5p:AHA2	0.394184
AT1G20696.3	miR5021	727	2.5	0.140406	0.664073	no	HMGB3	miR5021:HMGB3	0.395841
AT1G17130.2	miR414	1116	4.5	0.367802	0.986788	no	NA	miR414:AT1G17130.2	0.396492
AT1G78110.1	miR414	593	3.5	0.120566	0.763848	no	NA	miR414:AT1G78110.1	0.396492
AT2G19470.1	miR399a	889	4.5	0.380012	0.992318	no	ckl5	miR399a:ckl5	0.396492
AT5G46170.1	miR835-3p	42	3	0.224344	0.581233	no	NA	miR835-3p:AT5G46170.1	0.396492
AT4G37590.1	miR5658	1091	4	0.106831	0.957742	no	MEL1	miR5658:MEL1	0.397087
AT4G26180.1	miR2111b-3p	638	6	0.441058	1.14977	no	NA	miR2111b-3p:AT4G26180.1	0.397812
AT1G78950.1	miR396a-5p	1781	6	0.456319	1.25189	no	AtBAS	miR396a-5p:AtBAS	0.400358
AT1G05030.1	miR396b-5p	898	3.5	0.129723	0.743034	no	NA	miR396b-5p:AT1G05030.1	0.401424
AT1G47970.1	miR414	638	3.5	0.375433	0.752765	no	NA	miR414:AT1G47970.1	0.401424
AT2G34190.1	miR8166	1786	4	0.126671	0.941345	no	NA	miR8166:AT2G34190.1	0.401424
AT3G16785.1	miR166a-5p	744	4.5	0.163298	0.97568	no	PLD ZETA 1	miR166a-5p:PLD ZETA 1	0.401424
AT3G22960.1	miR5658	320	3.5	0.282338	0.805414	no	PKP-ALPHA	miR5658:PKP-ALPHA	0.401424
AT3G58220.2	miR774b-3p	1154	4	0.189243	0.934072	no	NA	miR774b-3p:AT3G58220.2	0.401424
AT4G02460.1	miR414	2955	3.5	0.144984	0.748563	no	AtPMS1	miR414:AtPMS1	0.401424
AT4G11100.2	miR5658	942	3.5	0.250289	0.808536	no	NA	miR5658:AT4G11100.2	0.401424
AT5G09350.1	miR2111b-3p	2745	6	0.337279	1.14207	no	PI-4KBETA2	miR2111b-3p:PI-4KBETA2	0.401424
AT5G42110.1	miR5021	267	3	0.135827	0.895337	no	NA	miR5021:AT5G42110.1	0.401424
AT5G67570.1	miR167a-3p	1556	4.5	0.154141	0.985663	no	DG1	miR167a-3p:DG1	0.401424
AT2G25810.1	miR417	229	6	0.164824	1.16482	no	TIP4;1	miR417:TIP4;1	0.402473
AT5G56350.1	miR835-5p	1654	4.5	0.244184	1.04889	no	NA	miR835-5p:AT5G56350.1	0.404107
AT5G60910.2	miR159b-5p	196	3.5	0.15872	0.700252	no	AGL8	miR159b-5p:AGL8	0.411262
AT3G14410.1	miR5656	720	6	0.457845	1.21649	no	NA	miR5656:AT3G14410.1	0.412809
AT3G54270.1	miR166a-5p	481	5	0.120566	1.02086	no	NA	miR166a-5p:AT3G54270.1	0.423943
AT1G47900.2	miR414	2767	5	0.128197	1.1282	no	NA	miR414:AT1G47900.2	0.423984
AT1G30530.1	miR773b-3p	1144	4.5	0.96758	1.04119	no	UGT78D1	miR773b-3p:UGT78D1	0.424278
AT3G07050.1	miR172b-5p	1235	4.5	0.470055	1.08934	no	NSN1	miR172b-5p:NSN1	0.424278
AT5G05930.2	miR5658	1131	4	0.239606	1.00869	no	ATGC1	miR5658:ATGC1	0.424278
AT4G18030.1	miR5999	2119	3.5	0.106831	0.713651	no	NA	miR5999:AT4G18030.1	0.425127
AT3G13430.3	miR414	545	5	0.141932	1.02746	no	NA	miR414:AT3G13430.3	0.425999
AT5G17580.1	miR5021	1570	3	0.202978	0.876563	no	NA	miR5021:AT5G17580.1	0.425999
AT1G15280.2	miR414	188	3.5	0.184664	0.696655	no	NA	miR414:AT1G15280.2	0.427918
AT5G18520.1	miR414	1334	3.5	0.135827	0.692807	no	Cand7	miR414:Cand7	0.427918
AT5G42240.1	miR865-5p	682	3.5	0.0732553	0.792616	no	scpl42	miR865-5p:scpl42	0.427918
AT1G54960.1	miR414	1195	5.5	0.15872	1.15872	no	ANP2	miR414:ANP2	0.429729
AT3G58850.1	miR414	181	4	0.215187	0.974303	no	HLH2	miR414:HLH2	0.429729
AT3G42850.1	miR5665	371	6	0.202978	1.20298	no	NA	miR5665:AT3G42850.1	0.429925
AT3G51830.2	miR5658	28	3	0.157194	0.4395	no	ATG5	miR5658:ATG5	0.429925
AT5G03650.1	miR2111a-5p	2043	3.5	0.193821	0.821474	no	SBE2.2	miR2111a-5p:SBE2.2	0.429925
AT5G59350.1	miR5021	1158	3	0.157194	0.96932	no	NA	miR5021:AT5G59350.1	0.429925
AT3G26932.2	miR5658	1270	5	0.2976	1.14089	no	DRB3	miR5658:DRB3	0.430069
AT1G53230.1	miR5658	1252	3	0.2976	0.0988166	no	TCP3	miR5658:TCP3	0.436648
AT3G04910.3	miR847	1606	4	0.128197	0.959754	no	ATWNK1	miR847:ATWNK1	0.441175
AT5G62570.2	miR5021	1618	3.5	0.151089	1.01891	no	NA	miR5021:AT5G62570.2	0.441175
AT3G15990.1	miR866-3p	1740	4	0.193821	1.00128	no	SULTR3;4	miR866-3p:SULTR3;4	0.444022
AT5G41770.1	miR837-5p	183	6	0.134301	1.1343	no	NA	miR837-5p:AT5G41770.1	0.445987
AT3G61130.1	miR5595a	1208	5	0.108357	1.10836	no	GAUT1	miR5595a:GAUT1	0.44786
AT2G43018.1	miR5651	1458	3.5	0.112935	0.734204	no	CPuORF17	miR5651:CPuORF17	0.448658
AT2G43020.1	miR5651	1459	3.5	0.112935	0.734204	no	ATPAO2	miR5651:ATPAO2	0.448658
AT1G15290.1	miR167a-3p	946	5.5	0.193821	1.05817	no	NA	miR167a-3p:AT1G15290.1	0.449384
AT3G56190.2	miR5663-5p	872	4.5	0.396799	0.980712	no	ALPHA-SNAP2	miR5663-5p:ALPHA-SNAP2	0.450546
AT3G29075.1	miR414	531	3.5	0.485316	0.645282	no	NA	miR414:AT3G29075.1	0.450839
AT1G66150.1	miR165a-5p	1865	4	0.141932	0.932689	no	TMK1	miR165a-5p:TMK1	0.45999
AT2G28350.1	miR172d-5p	1768	6	0.882115	1.18326	no	ARF10	miR172d-5p:ARF10	0.460446
AT1G47970.1	miR414	233	3.5	0.0442584	0.611345	no	NA	miR414:AT1G47970.1	0.46624
AT4G27310.1	miR414	624	4	0.0930952	0.89058	no	BBX28	miR414:BBX28	0.46624
AT5G65430.3	miR5021	128	3.5	0.1984	1.00512	no	14-3-3KAPPA	miR5021:14-3-3KAPPA	0.466329
AT5G43330.1	miR171c-5p	640	5.5	0.610461	1.10584	no	c-NAD-MDH2	miR171c-5p:c-NAD-MDH2	0.46921
AT2G36060.3	miR414	299	5.5	0.970632	1.05473	no	MMZ3	miR414:MMZ3	0.469973
AT2G32320.3	miR419	1792	4.5	0.822596	0.965246	no	NA	miR419:AT2G32320.3	0.471554
AT5G60890.1	miR858a	638	4.5	0.111409	0.957908	no	ATMYB34	miR858a:ATMYB34	0.474722
AT3G42790.1	miR414	725	3.5	0.270129	0.573865	no	AL3	miR414:AL3	0.477987
AT5G62260.1	miR414	1287	4.5	0.117514	0.960643	no	NA	miR414:AT5G62260.1	0.478735
AT2G19600.1	miR5638b	1239	6	0.430375	1.22157	no	ATKEA4	miR5638b:ATKEA4	0.479765
AT2G25760.2	miR773a	2002	4.5	0.268603	1.00972	no	NA	miR773a:AT2G25760.2	0.479765
AT4G39640.2	miR2111a-5p	996	5	0.0991998	1.0992	no	GGT1	miR2111a-5p:GGT1	0.485162
AT3G27160.1	miR5021	31	4	0.253341	1.07038	no	GHS1	miR5021:GHS1	0.487596
AT5G41070.1	miR5658	820	4	0.163298	0.90825	no	DRB5	miR5658:DRB5	0.48785
AT1G76810.1	miR158a-5p	4352	5	0.392221	0.998905	no	NA	miR158a-5p:AT1G76810.1	0.489372
AT2G31585.2	miR1886.1	36	5	0.315913	1.04737	no	NA	miR1886.1:AT2G31585.2	0.489372
AT3G25520.2	miR414	699	3.5	1.55667	0.524949	no	ATL5	miR414:ATL5	0.489853
AT3G47990.1	miR833a-3p	439	6	0.303704	1.11194	no	SIS3	miR833a-3p:SIS3	0.489853
AT5G05700.1	miR414	1719	4	0.0152615	0.87389	no	ATATE1	miR414:ATATE1	0.490609
AT5G09460.1	miR838	2121	3.5	0.134301	0.367171	no	NA	miR838:AT5G09460.1	0.491194
AT5G09461.1	miR838	2121	3.5	0.134301	0.367171	no	CPuORF43	miR838:CPuORF43	0.491194
AT5G09462.1	miR838	2121	3.5	0.134301	0.367171	no	CPuORF42	miR838:CPuORF42	0.491194
AT5G09463.1	miR838	2121	3.5	0.134301	0.367171	no	CPuORF41	miR838:CPuORF41	0.491194
AT1G48210.2	miR774b-5p	1179	5	0.302178	1.02647	no	NA	miR774b-5p:AT1G48210.2	0.493131
AT3G02750.3	miR5024-5p	2114	4	0.141932	0.973967	no	NA	miR5024-5p:AT3G02750.3	0.493215
AT3G59710.1	miR5021	1067	5	0.173981	1.04624	no	NA	miR5021:AT3G59710.1	0.495917
AT5G22130.2	miR5640	483	6	0.189243	1.18924	no	PNT1	miR5640:PNT1	0.496714
AT2G47420.1	miR414	977	4	0.282338	0.938564	no	DIM1A	miR414:DIM1A	0.496779
AT5G22020.1	miR5021	67	5	0.143458	1.14346	no	NA	miR5021:AT5G22020.1	0.496779
AT4G00830.4	miR414	488	4	0.27776	0.865598	no	LIF2	miR414:LIF2	0.498913
AT5G16650.1	miR158a-5p	882	3.5	0.216713	0.155643	no	NA	miR158a-5p:AT5G16650.1	0.498913
AT1G06040.2	miR1886.1	706	3.5	0.267076	0.713118	no	BBX24	miR1886.1:BBX24	0.499435
AT1G30290.1	miR837-5p	2323	6	0.169403	1.1694	no	NA	miR837-5p:AT1G30290.1	0.499546
AT2G21470.3	miR4221	1796	4.5	0.20603	0.99122	no	ATSAE2	miR4221:ATSAE2	0.499546
AT5G35670.1	miR166e-5p	1013	4	0.175507	0.925502	no	iqd33	miR166e-5p:iqd33	0.499546
AT3G09200.2	miR5662	663	3.5	0.181612	0.456177	no	NA	miR5662:AT3G09200.2	0.501747
AT1G13245.1	miR859	490	4.5	0.169403	0.957513	no	DVL4	miR859:DVL4	0.502119
AT3G51075.1	miR5638b	1357	4	0.111409	0.820793	no	NA	miR5638b:AT3G51075.1	0.502119
AT4G03205.2	miR390a-5p	469	4	0.0228923	0.860121	no	hemf2	miR390a-5p:hemf2	0.502119
AT1G26310.1	miR773b-3p	448	6	0.16635	1.16635	no	AGL10	miR773b-3p:AGL10	0.502247
AT4G00238.1	miR866-5p	655	4.5	0.18619	1.00778	no	NA	miR866-5p:AT4G00238.1	0.502628
AT1G12570.1	miR156i	153	4.5	0.1984	1.00127	no	NA	miR156i:AT1G12570.1	0.505342
AT3G49800.1	miR414	1286	4	0.123618	0.923486	no	NA	miR414:AT3G49800.1	0.508683
AT2G30500.2	miR413	1510	4	0.163298	0.90717	no	NET4B	miR413:NET4B	0.509297
AT2G24755.3	miR2934-5p	1253	4	0.172455	0.920886	no	NA	miR2934-5p:AT2G24755.3	0.51024
AT1G03457.2	miR2934-5p	1168	5	0.105304	1.00277	no	NA	miR2934-5p:AT1G03457.2	0.510279
AT3G14400.1	miR169f-3p	794	5.5	0.195347	1.05809	no	UBP25	miR169f-3p:UBP25	0.510303
AT4G14930.1	miR5021	197	4	0.282338	1.04867	no	NA	miR5021:AT4G14930.1	0.510401
AT5G06770.1	miR414	35	3.5	0.247237	0.346989	no	NA	miR414:AT5G06770.1	0.514514
AT1G31650.1	miR830-3p	596	5.5	0.210609	1.04204	no	ATROPGEF14	miR830-3p:ATROPGEF14	0.516315
AT3G18810.1	miR2111a-5p	1681	6	0.152615	1.15261	no	AtPERK6	miR2111a-5p:AtPERK6	0.517741
AT2G33430.1	miR414	783	3.5	0.256393	0.0574719	no	DAL	miR414:DAL	0.519501
AT2G47850.3	miR857	1220	4.5	0.134301	1.0027	no	NA	miR857:AT2G47850.3	0.519501
AT1G67230.1	miR399f	3651	4.5	0.26555	0.994006	no	CRWN1	miR399f:CRWN1	0.521231
AT1G78420.2	miR156i	50	6	0.180086	1.18009	no	NA	miR156i:AT1G78420.2	0.521231
AT5G11380.2	miR447a-3p	1816	5	0.196874	1.05659	no	DXPS3	miR447a-3p:DXPS3	0.521231
AT2G22370.1	miR157a-5p	515	3.5	0.132775	0.757203	no	NA	miR157a-5p:AT2G22370.1	0.521367
AT5G25220.2	miR156f-3p	582	4.5	0.137354	0.937127	no	KNAT3	miR156f-3p:KNAT3	0.521367
AT4G18820.1	miR5658	2762	4	0.148037	0.875472	no	NA	miR5658:AT4G18820.1	0.521711
AT5G35750.1	miR840-3p	1069	5	0.135827	0.992003	no	AHK2	miR840-3p:AHK2	0.521741
AT1G62380.1	miR2939	1182	3.5	0.62267	0.60164	no	ACO2	miR2939:ACO2	0.52192
AT1G12830.1	miR414	562	4	0.13888	0.845848	no	NA	miR414:AT1G12830.1	0.522302
AT2G35680.1	miR8172	765	5.5	0.221292	1.04711	no	NA	miR8172:AT2G35680.1	0.522302
AT2G47900.3	miR5013	1440	4.5	0.134301	0.935788	no	AtTLP3	miR5013:AtTLP3	0.522302
AT3G07740.4	miR870-3p	1194	4.5	0.253341	0.930858	no	ADA2A	miR870-3p:ADA2A	0.522302
AT4G08580.1	miR847	574	4.5	0.0595199	0.935331	no	NA	miR847:AT4G08580.1	0.522302
AT5G40270.1	miR8177	618	5	0.131249	0.994632	no	NA	miR8177:AT5G40270.1	0.522302
AT1G56560.1	miR1886.2	281	5	0.161772	1	no	A/N-InvA	miR1886.2:A/N-InvA	0.522848
AT5G56380.1	miR5021	17	5.5	0.561624	1.05354	no	NA	miR5021:AT5G56380.1	0.522848
AT3G23810.1	miR172d-5p	976	3.5	0.164824	0.315358	no	ATSAHH2	miR172d-5p:ATSAHH2	0.52455
AT1G24160.2	miR396a-5p	786	4.5	0.140406	0.950397	no	NA	miR396a-5p:AT1G24160.2	0.525282
AT1G62800.2	miR390a-5p	568	5.5	0.21824	1.03905	no	ASP4	miR390a-5p:ASP4	0.525282
AT2G23350.1	miR156f-3p	1923	4	0.227397	0.852636	no	PAB4	miR156f-3p:PAB4	0.525447
AT1G71840.1	miR5650	1410	4.5	0.308283	0.994202	no	NA	miR5650:AT1G71840.1	0.527715
AT1G14670.1	miR5658	1537	4	0.170929	0.866703	no	NA	miR5658:AT1G14670.1	0.530177
AT4G02280.1	miR866-5p	1175	6	0.157194	1.15719	no	ATSUS3	miR866-5p:ATSUS3	0.531283
AT5G58610.1	miR837-5p	2620	6	0.157194	1.15719	no	NA	miR837-5p:AT5G58610.1	0.533996
AT3G62360.1	miR5632-3p	3485	4.5	0.180086	0.943851	no	NA	miR5632-3p:AT3G62360.1	0.53459
AT4G00760.1	miR5645a	3010	5.5	0.40443	1.04189	no	APRR8	miR5645a:APRR8	0.53459
AT4G33240.3	miR776	4633	5	0.177034	0.983423	no	FAB1A	miR776:FAB1A	0.53459
AT5G52060.1	miR5022	1452	4	0.108357	0.839352	no	ATBAG1	miR5022:ATBAG1	0.53459
AT5G53620.3	miR5632-5p	1867	6	0.215187	1.08444	no	NA	miR5632-5p:AT5G53620.3	0.53459
AT2G32235.1	miR5658	1945	5	0.102252	1.10225	no	NA	miR5658:AT2G32235.1	0.534676
AT3G01530.1	miR858a	992	5.5	0.544836	1.11944	no	ATMYB57	miR858a:ATMYB57	0.534676
AT3G19050.1	miR4221	7806	5.5	0.120566	1.12057	no	POK2	miR4221:POK2	0.534676
AT1G69640.1	miR5021	750	5	0.195347	1.01556	no	SBH1	miR5021:SBH1	0.535399
AT1G79530.1	miR447c-3p	1239	4	0.155667	0.705565	no	GAPCP-1	miR447c-3p:GAPCP-1	0.535399
AT4G34240.2	miR824-3p	505	4.5	0.135827	0.91741	no	ALDH3	miR824-3p:ALDH3	0.535399
AT1G31910.2	miR8170-5p	145	5	0.16635	1.00131	no	NA	miR8170-5p:AT1G31910.2	0.537558
AT5G01260.2	miR5012	1037	5.5	0.340332	1.0245	no	NA	miR5012:AT5G01260.2	0.540689
AT3G42170.1	miR870-5p	2043	5.5	0.294547	1.01193	no	DAYSLEEPER	miR870-5p:DAYSLEEPER	0.544137
AT3G14830.2	miR8165	1734	5	0.219766	1.01267	no	NA	miR8165:AT3G14830.2	0.544224
AT4G21450.3	miR5658	358	4	0.221292	0.853826	no	NA	miR5658:AT4G21450.3	0.544224
AT1G62760.1	miR5658	159	5	0.0259446	1	no	NA	miR5658:AT1G62760.1	0.547077
AT1G62760.1	miR5658	306	5	0.0259446	1	no	NA	miR5658:AT1G62760.1	0.547077
AT4G36840.1	miR824-3p	1020	5.5	0.250289	1.11729	no	NA	miR824-3p:AT4G36840.1	0.547138
AT5G02540.1	miR164c-5p	345	5.5	0.311335	1.12726	no	NA	miR164c-5p:AT5G02540.1	0.550693
AT5G40770.1	miR5021	60	4	0.195347	1.0262	no	ATPHB3	miR5021:ATPHB3	0.550693
AT3G53610.3	miR172c	589	4.5	0.291495	0.986018	no	ATRAB8	miR172c:ATRAB8	0.551769
AT4G31410.2	miR396b-5p	1105	5	0.216713	1.05422	no	NA	miR396b-5p:AT4G31410.2	0.551769
AT5G07350.2	miR8184	2667	4	0.137354	0.812482	no	AtTudor1	miR8184:AtTudor1	0.554557
AT1G60070.2	miR846-3p	1319	4.5	0.106831	0.98506	no	NA	miR846-3p:AT1G60070.2	0.556253
AT4G31410.2	miR5021	1293	5	0.120566	1.12057	no	NA	miR5021:AT4G31410.2	0.558068
AT1G76580.1	miR774a	2103	5	0.213661	1.04193	no	NA	miR774a:AT1G76580.1	0.558512
AT3G09350.3	miR5013	1323	4.5	0.152615	0.9174	no	Fes1A	miR5013:Fes1A	0.560191
AT5G23405.2	miR414	475	4.5	0.148037	0.975364	no	NA	miR414:AT5G23405.2	0.561169
AT2G36070.1	miR5021	1760	4.5	0.120566	0.978674	no	ATTIM44-2	miR5021:ATTIM44-2	0.563875
AT5G09590.1	miR5638a	2225	4	0.132775	0.918341	no	HSC70-5	miR5638a:HSC70-5	0.566991
AT2G17390.1	miR167d	363	4.5	0.244184	0.958835	no	AKR2B	miR167d:AKR2B	0.568267
AT1G55530.1	miR5021	121	4	0.338806	0.948122	no	NA	miR5021:AT1G55530.1	0.569342
AT2G17900.1	miR8166	1519	4	0.143458	0.829503	no	ASHR1	miR8166:ASHR1	0.569342
AT2G35040.2	miR396a-5p	1662	5.5	0.376959	1.03203	no	NA	miR396a-5p:AT2G35040.2	0.570758
AT2G27470.1	miR156f-3p	840	5.5	0.378486	1.02264	no	NF-YB11	miR156f-3p:NF-YB11	0.571364
AT5G60960.1	miR161.2	998	5	0.163298	0.97568	no	PNM1	miR161.2:PNM1	0.571364
AT5G57720.1	miR414	458	5.5	0.109883	1.10988	no	NA	miR414:AT5G57720.1	0.574542
AT5G23000.1	miR858a	402	5.5	0.15872	1.10477	no	ATMYB37	miR858a:ATMYB37	0.57733
AT3G47680.1	miR779.1	1031	4	0.137354	0.751827	no	NA	miR779.1:AT3G47680.1	0.57775
AT1G28250.1	miR838	36	4	0.123618	0.845049	no	NA	miR838:AT1G28250.1	0.578098
AT1G37130.1	miR3434-5p	2652	4.5	0.105304	0.919973	no	ATNR2	miR3434-5p:ATNR2	0.579001
AT4G32360.1	miR773a	1532	4	0.155667	0.844908	no	NA	miR773a:AT4G32360.1	0.580637
AT1G49750.1	miR854a	271	5	0.115988	1.11599	no	NA	miR854a:AT1G49750.1	0.581847
AT3G56800.1	miR5021	80	5	0.419692	1.11374	no	ACAM-3	miR5021:ACAM-3	0.581847
AT4G35920.3	miR5662	148	4.5	0.144984	0.930542	no	MCA1	miR5662:MCA1	0.582591
AT1G27530.1	miR5645a	398	5	0.207557	1.05185	no	NA	miR5645a:AT1G27530.1	0.583699
AT1G13710.1	miR5657	1269	4.5	0.0976737	0.915949	no	CYP78A5	miR5657:CYP78A5	0.584196
AT3G04590.2	miR5658	1065	4	0.157194	0.82396	no	NA	miR5658:AT3G04590.2	0.584196
AT3G09740.1	miR833b	248	5	0.135827	0.975106	no	ATSYP71	miR833b:ATSYP71	0.584196
AT5G46570.1	miR870-3p	1181	5	0.11904	0.974742	no	BSK2	miR870-3p:BSK2	0.584196
AT2G41790.1	miR832-5p	2229	4.5	0.247237	0.980798	no	NA	miR832-5p:AT2G41790.1	0.584796
AT5G50920.1	miR858b	387	5.5	0.433427	1.10598	no	ATHSP93-V	miR858b:ATHSP93-V	0.584796
AT1G20010.1	miR774a	135	5	0.151089	0.974168	no	TUB5	miR774a:TUB5	0.588008
AT3G08600.1	miR5658	1225	4	0.148037	0.81922	no	NA	miR5658:AT3G08600.1	0.590761
AT5G07410.1	miR5654-5p	1349	3.5	0.256393	0.61655	no	NA	miR5654-5p:AT5G07410.1	0.590761
AT5G26230.1	miR5021	214	6	0.326596	1.05459	no	MAKR1	miR5021:MAKR1	0.591797
AT5G43960.2	miR847	1450	6	0.552467	1.13374	no	NA	miR847:AT5G43960.2	0.593939
AT5G67130.1	miR5021	307	4	0.283864	1.00718	no	NA	miR5021:AT5G67130.1	0.594283
AT1G63670.3	miR172d-5p	2209	4.5	0.18619	0.904567	no	TRM12	miR172d-5p:TRM12	0.59644
AT1G65440.3	miR414	246	4	0.224344	0.771207	no	GTB1	miR414:GTB1	0.59644
AT1G63000.1	miR780.1	315	4.5	0.126671	0.894577	no	NRS/ER	miR780.1:NRS/ER	0.597569
AT1G68790.1	miR773b-3p	1588	4.5	0.175507	0.88306	no	CRWN3	miR773b-3p:CRWN3	0.597873
AT2G40730.1	miR5019	1379	5	0.190769	0.986098	no	CTEXP	miR5019:CTEXP	0.597873
AT5G16880.3	miR844-3p	1434	4	0.16635	0.753511	no	NA	miR844-3p:AT5G16880.3	0.597873
AT3G59040.2	miR5021	35	3.5	0.163298	0.838327	no	NA	miR5021:AT3G59040.2	0.597911
AT1G09840.6	miR840-3p	1478	5	0.236553	1.02922	no	AtHIR1	miR840-3p:AtHIR1	0.598165
AT5G16000.1	miR831-3p	1771	6	0.189243	1.04143	no	AtNIK1	miR831-3p:AtNIK1	0.598874
AT1G16720.1	miR868-3p	1851	4	0.17856	0.760649	no	HCF173	miR868-3p:HCF173	0.600271
AT2G32810.2	miR852	1777	4.5	0.128197	0.964763	no	BGAL9	miR852:BGAL9	0.606071
AT3G28860.1	miR156h	2900	5	0.22587	1.08511	no	ABCB19	miR156h:ABCB19	0.607119
AT5G61530.3	miR172d-5p	300	5	0.140406	1.02892	no	NA	miR172d-5p:AT5G61530.3	0.607119
AT2G40300.1	miR5655	886	3.5	0.169403	0.570018	no	ATFER4	miR5655:ATFER4	0.608659
AT1G03475.1	miR390a-5p	476	4	0.0991998	0.746952	no	ATCPO-I	miR390a-5p:ATCPO-I	0.609044
AT3G51120.1	miR5650	2219	5	0.137354	0.972594	no	NA	miR5650:AT3G51120.1	0.609044
AT1G12920.1	miR856	1359	4	0.433427	0.795805	no	ERF1-2	miR856:ERF1-2	0.613926
AT5G24735.1	miR1886.1	63	3.5	0.2976	0.136361	no	NA	miR1886.1:AT5G24735.1	0.613926
AT2G44950.1	miR5637	2074	4.5	0.161772	0.88082	no	HUB1	miR5637:HUB1	0.61436
AT4G36140.1	miR5656	3047	5	0.18619	0.978596	no	NA	miR5656:AT4G36140.1	0.614514
AT4G36530.2	miR5021	354	4	0.227397	0.925223	no	NA	miR5021:AT4G36530.2	0.615261
AT1G49670.2	miR5021	2114	3	0.125144	0.79338	no	NQR	miR5021:NQR	0.616648
AT3G06380.1	miR396a-5p	1297	4.5	0.135827	0.964991	no	ATTLP9	miR396a-5p:ATTLP9	0.616648
AT5G50150.1	miR5026	955	4	0.125144	0.862027	no	NA	miR5026:AT5G50150.1	0.616648
AT3G49410.1	miR414	1527	4.5	0.0030523	0.953572	no	NA	miR414:AT3G49410.1	0.616952
AT4G17170.1	miR156c-3p	526	4.5	0.248763	0.921193	no	AT-RAB2	miR156c-3p:AT-RAB2	0.619375
AT5G53000.1	miR414	1239	4	0.120566	0.810205	no	TAP46	miR414:TAP46	0.620095
AT4G36980.4	miR838	830	4.5	0.111409	0.944245	no	NA	miR838:AT4G36980.4	0.620947
AT3G53710.2	miR867	1477	4.5	0.22587	0.893243	no	AGD6	miR867:AGD6	0.629829
AT1G48760.3	miR169d	1747	6	0.195347	1.03983	no	delta-ADR	miR169d:delta-ADR	0.630336
AT2G36290.1	miR419	1344	4.5	0.148037	0.879567	no	NA	miR419:AT2G36290.1	0.632472
AT2G46030.1	miR414	561	4.5	0.639457	0.883247	no	UBC6	miR414:UBC6	0.632472
AT1G67580.2	miR169f-3p	2334	5.5	0.239606	1.01121	no	NA	miR169f-3p:AT1G67580.2	0.633605
AT5G18610.2	miR835-5p	1880	5.5	0.157194	0.994753	no	NA	miR835-5p:AT5G18610.2	0.633605
AT1G20910.1	miR837-5p	468	5	0.143458	0.95537	no	NA	miR837-5p:AT1G20910.1	0.634946
AT5G26000.2	miR4227	851	4	0.576885	0.728538	no	AtTGG1	miR4227:AtTGG1	0.634946
AT5G56950.1	miR414	1097	4	0.106831	0.716472	no	NAP1;3	miR414:NAP1;3	0.638323
AT2G11910.2	miR414	442	4	0.541784	0.710817	no	NA	miR414:AT2G11910.2	0.638548
AT3G26570.2	miR5021	212	3	0.135827	0.598149	no	ORF02	miR5021:ORF02	0.638548
AT4G37030.1	miR408-5p	382	4.5	0.17856	0.932387	no	NA	miR408-5p:AT4G37030.1	0.638548
AT5G51840.1	miR839-5p	776	4	0.0961475	0.691121	no	NA	miR839-5p:AT5G51840.1	0.638548
AT5G46030.1	miR838	405	4	0.680664	0.751064	no	NA	miR838:AT5G46030.1	0.644841
AT3G53380.1	miR5021	13	4	0.149563	0.907257	no	NA	miR5021:AT3G53380.1	0.646597
AT1G70280.2	miR3434-3p	712	4.5	0.0427322	0.953926	no	NA	miR3434-3p:AT1G70280.2	0.646756
AT3G01500.3	miR5658	1200	4	0.648614	0.860585	no	ATBCA1	miR5658:ATBCA1	0.646756
AT3G18680.1	miR822-5p	712	4.5	0.155667	0.93806	no	NA	miR822-5p:AT3G18680.1	0.646756
AT5G43280.2	miR399e	807	4.5	0.149563	0.928505	no	ATDCI1	miR399e:ATDCI1	0.646756
AT1G79790.2	miR394a	277	4	0.131249	0.712567	no	AtcpFHy1	miR394a:AtcpFHy1	0.647595
AT2G03220.1	miR158a-3p	1500	4	0.274707	0.830061	no	ATFT1	miR158a-3p:ATFT1	0.647595
AT3G51880.4	miR414	542	4	0.306756	0.693739	no	AtHMGB1	miR414:AtHMGB1	0.647595
AT4G19112.1	miR426	456	5	0.901955	0.946816	no	CPuORF25	miR426:CPuORF25	0.647595
AT5G08020.1	miR5019	1291	4	0.114461	0.778309	no	ATRPA70B	miR5019:ATRPA70B	0.647595
AT5G58140.4	miR829-5p	1056	4	0.15872	0.700898	no	NPL1	miR829-5p:NPL1	0.647595
AT3G52560.4	miR414	259	5.5	0.433427	1.0634	no	MMZ4	miR414:MMZ4	0.648721
AT2G45660.1	miR173-3p	226	4	0.170929	0.67584	no	AGL20	miR173-3p:AGL20	0.649356
AT1G27070.1	miR5021	164	5	0.141932	0.980347	no	NA	miR5021:AT1G27070.1	0.654997
AT3G20250.1	miR2112-5p	2569	5	0.167877	0.962276	no	APUM5	miR2112-5p:APUM5	0.654997
AT4G29450.1	miR858b	2511	6	0.122092	1.12209	no	NA	miR858b:AT4G29450.1	0.662565
AT5G66440.1	miR414	614	5	0.123618	0.952149	no	NA	miR414:AT5G66440.1	0.66375
AT3G20780.1	miR5632-3p	1696	5	0.210609	1.01277	no	ATTOP6B	miR5632-3p:ATTOP6B	0.665201
AT4G22200.1	miR838	2759	4	0.154141	0.696842	no	AKT2	miR838:AKT2	0.666133
AT3G25890.2	miR829-3p.2	1224	5	0.105304	0.956421	no	CRF11	miR829-3p.2:CRF11	0.668818
AT1G10850.1	miR5021	494	4	0.141932	0.895839	no	NA	miR5021:AT1G10850.1	0.670196
AT3G44940.1	miR3440b-3p	21	4	0.154141	0.533226	no	NA	miR3440b-3p:AT3G44940.1	0.670196
AT3G07760.2	miR172d-5p	266	4.5	0.0824122	0.932916	no	NA	miR172d-5p:AT3G07760.2	0.671524
AT3G52230.1	miR414	512	4	0.651667	0.657003	no	NA	miR414:AT3G52230.1	0.672195
AT5G38460.2	miR774b-5p	1517	6	0.155667	1.04412	no	NA	miR774b-5p:AT5G38460.2	0.673089
AT1G48650.2	miR161.2	3562	5	0.140406	1.00268	no	NA	miR161.2:AT1G48650.2	0.674226
AT1G74850.1	miR3440b-5p	2044	5.5	0.143458	1.05047	no	PDE343	miR3440b-5p:PDE343	0.674226
AT4G25280.1	miR773b-3p	364	4	0.11904	0.675649	no	NA	miR773b-3p:AT4G25280.1	0.674226
AT5G17900.1	miR847	643	4.5	0.140406	0.923385	no	NA	miR847:AT5G17900.1	0.674226
AT5G19320.1	miR414	1714	4.5	0.105304	0.921143	no	RANGAP2	miR414:RANGAP2	0.674226
AT5G42240.1	miR3434-3p	779	4.5	0.125144	0.940069	no	scpl42	miR3434-3p:scpl42	0.674226
AT5G42780.1	miR5021	45	3	0.0885168	0.6621	no	AtHB27	miR5021:AtHB27	0.674226
AT5G61340.1	miR415	506	6	0.0930952	1.0931	no	NA	miR415:AT5G61340.1	0.674226
AT5G23730.1	miR164b-3p	855	5.5	0.230449	1.03068	no	EFO2	miR164b-3p:EFO2	0.674961
AT5G06670.1	miR5025	1102	5	0.405956	0.998916	no	NA	miR5025:AT5G06670.1	0.67523
AT4G08350.1	miR414	538	5	0.126671	0.947385	no	GTA02	miR414:GTA02	0.675908
AT1G51350.1	miR5021	438	5	0.163298	0.97568	no	NA	miR5021:AT1G51350.1	0.676106
AT1G60160.1	miR2937	2025	4.5	0.108357	0.86846	no	NA	miR2937:AT1G60160.1	0.678052
AT1G79750.1	miR837-3p	2249	3.5	0.108357	0.59614	no	ATNADP-ME4	miR837-3p:ATNADP-ME4	0.678796
AT2G32600.1	miR5021	1138	5.5	0.349489	0.986611	no	NA	miR5021:AT2G32600.1	0.678796
AT3G23050.2	miR8177	903	5	0.148037	0.942373	no	AXR2	miR8177:AXR2	0.678796
AT3G56590.2	miR5658	1261	4	0.161772	0.720708	no	NA	miR5658:AT3G56590.2	0.678796
AT3G59760.3	miR5642a	377	4.5	0.163298	0.851437	no	ATCS-C	miR5642a:ATCS-C	0.678796
AT4G32260.1	miR5021	895	3	0.181612	0.475507	no	PDE334	miR5021:PDE334	0.678796
AT4G36660.1	miR171a-3p	587	4.5	0.154141	0.854277	no	NA	miR171a-3p:AT4G36660.1	0.678796
AT2G35510.1	miR5998a	1177	5	0.131249	0.940374	no	SRO1	miR5998a:SRO1	0.679723
AT1G78480.1	miR5021	63	3.5	0.157194	0.864348	no	NA	miR5021:AT1G78480.1	0.681565
AT3G47820.1	miR5656	517	6	0.140406	1.03605	no	PUB39	miR5656:PUB39	0.683143
AT5G65140.2	miR8172	535	6	0.2976	1.02905	no	TPPJ	miR8172:TPPJ	0.683143
AT1G28960.5	miR859	781	5	0.184664	1	no	ATNUDT15	miR859:ATNUDT15	0.683402
AT2G30120.2	miR773a	710	5	0.135827	0.988051	no	NA	miR773a:AT2G30120.2	0.686429
AT1G28580.2	miR837-5p	899	4.5	0.13888	0.842981	no	NA	miR837-5p:AT1G28580.2	0.687806
AT5G43320.1	miR399e	1217	4.5	0.080886	0.824264	no	ckl8	miR399e:ckl8	0.687806
AT1G06530.1	miR414	827	4.5	0.1984	0.84322	no	PMD2	miR414:PMD2	0.692035
AT1G69030.1	miR414	856	4	0.122092	0.596187	no	NA	miR414:AT1G69030.1	0.692035
AT2G35010.2	miR780.1	747	4.5	0.125144	0.889055	no	ATO1	miR780.1:ATO1	0.694403
AT3G13445.2	miR5643a	380	5	0.157194	0.936979	no	TBP1	miR5643a:TBP1	0.695211
AT5G40690.1	miR414	626	4.5	0.137354	0.840902	no	NA	miR414:AT5G40690.1	0.695913
AT1G52020.1	miR5642a	4885	6	0.01984	1.01984	no	NA	miR5642a:AT1G52020.1	0.697195
AT2G25110.1	miR5658	173	5	0.149563	0.947186	no	AtSDF2	miR5658:AtSDF2	0.697195
AT5G49100.1	miR5021	1308	4	0.259446	0.876759	no	NA	miR5021:AT5G49100.1	0.697195
AT5G52830.1	miR854a	88	5	0.172455	0.975865	no	ATWRKY27	miR854a:ATWRKY27	0.697195
AT5G12250.1	miR397a	481	5	0.201452	0.983755	no	TUB6	miR397a:TUB6	0.699954
AT4G29220.1	miR5658	248	5	0.114461	0.945612	no	PFK1	miR5658:PFK1	0.701492
AT5G04060.1	miR5028	2178	6	0.144984	1.02458	no	NA	miR5028:AT5G04060.1	0.703907
AT1G72440.1	miR414	2884	4	0.161772	0.555553	no	EDA25	miR414:EDA25	0.705176
AT4G38350.2	miR164a	980	5	0.0930952	0.948361	no	NA	miR164a:AT4G38350.2	0.705176
AT2G19480.3	miR414	1205	4	1.55667	0.542985	no	NAP1;2	miR414:NAP1;2	0.705458
AT5G04280.1	miR414	455	4.5	0.152615	0.832459	no	AtRZ-1c	miR414:AtRZ-1c	0.705458
AT1G21400.1	miR5021	33	3	0.247237	0.352984	no	NA	miR5021:AT1G21400.1	0.707924
AT1G75860.1	miR841a-3p	473	5	0.144984	0.923668	no	NA	miR841a-3p:AT1G75860.1	0.707924
AT2G20990.3	miR5014a-5p	2069	4	0.221292	0.431573	no	ATSYTA	miR5014a-5p:ATSYTA	0.708358
AT2G44020.1	miR414	1596	5	0.241132	0.932358	no	NA	miR414:AT2G44020.1	0.708358
AT3G15095.3	miR5021	50	3	0.111409	0.471585	no	HCF243	miR5021:HCF243	0.709358
AT1G62480.1	miR838	428	4	0.427322	0.414697	no	NA	miR838:AT1G62480.1	0.710543
AT3G43220.2	miR5021	24	4	0.0030523	0.957741	no	NA	miR5021:AT3G43220.2	0.710543
AT2G29960.2	miR5632-5p	378	5	0.567728	0.931112	no	ATCYP5	miR5632-5p:ATCYP5	0.711042
AT1G73660.1	miR842	2708	4.5	0.17856	0.888409	no	NA	miR842:AT1G73660.1	0.711657
AT2G35340.1	miR5630a	2505	5.5	0.515839	0.980261	no	MEE29	miR5630a:MEE29	0.712373
AT3G54720.1	miR4239	667	4.5	0.125144	0.809052	no	AMP1	miR4239:AMP1	0.715238
AT3G56408.1	miR5020b	229	5	0.175507	0.957724	no	NA	miR5020b:AT3G56408.1	0.715238
AT3G60220.1	miR5021	245	3	0.492947	0.294985	no	ATL4	miR5021:ATL4	0.715238
AT1G10120.1	miR5663-3p	2050	4	0.901955	0.601108	no	NA	miR5663-3p:AT1G10120.1	0.716627
AT1G15690.2	miR414	2086	4	0.482264	0.448975	no	AtAVP1	miR414:AtAVP1	0.716627
AT1G58070.1	miR5021	385	5	0.148037	0.957975	no	NA	miR5021:AT1G58070.1	0.716627
AT2G19480.3	miR414	1181	4	1.20719	0.468762	no	NAP1;2	miR414:NAP1;2	0.716627
AT2G22080.1	miR414	598	4	0.111409	0.46055	no	NA	miR414:AT2G22080.1	0.716627
AT3G47000.1	miR2938	1129	6	0.267076	1.01219	no	NA	miR2938:AT3G47000.1	0.716627
AT4G33950.2	miR5021	106	4	0.11904	0.861379	no	ATOST1	miR5021:ATOST1	0.716627
AT4G34030.1	miR5663-5p	1743	4.5	0.129723	0.838096	no	MCCB	miR5663-5p:MCCB	0.716627
AT5G61200.3	miR837-5p	862	5.5	0.163298	0.978184	no	NA	miR837-5p:AT5G61200.3	0.716627
AT1G32500.1	miR157a-3p	988	6	0.294547	1.00236	no	ABCI7	miR157a-3p:ABCI7	0.717233
AT5G22320.2	miR414	1109	4.5	0.175507	0.811428	no	NA	miR414:AT5G22320.2	0.717919
AT5G26710.1	miR414	2123	5	0.172455	0.92421	no	NA	miR414:AT5G26710.1	0.717919
AT5G40480.1	miR4239	5837	6	0.470055	1.00312	no	EMB3012	miR4239:EMB3012	0.717919
AT3G52890.2	miR390a-5p	2954	5.5	0.169403	1.04075	no	KIPK	miR390a-5p:KIPK	0.718657
AT1G47395.1	miR414	195	5.5	0.0915691	1.02435	no	NA	miR414:AT1G47395.1	0.720235
AT1G76030.1	miR859	1241	6	0.515839	1.09238	no	AtVAB1	miR859:AtVAB1	0.720235
AT2G18193.1	miR773b-3p	1034	6	0.0915691	1.09157	no	NA	miR773b-3p:AT2G18193.1	0.720235
AT2G37920.1	miR414	606	5	0.120566	0.976071	no	emb1513	miR414:emb1513	0.720235
AT3G16840.1	miR5998a	1285	5	0.141932	0.982923	no	NA	miR5998a:AT3G16840.1	0.720235
AT4G14760.1	miR172d-5p	5156	5	0.146511	0.979146	no	NET1B	miR172d-5p:NET1B	0.720235
AT5G16880.3	miR869.2	767	5	0.148037	0.984299	no	NA	miR869.2:AT5G16880.3	0.720235
AT5G57960.1	miR773a	1346	5.5	0.383064	1.02026	no	NA	miR773a:AT5G57960.1	0.720235
AT5G65220.1	miR5021	49	6	0.373907	1.09753	no	NA	miR5021:AT5G65220.1	0.720235
AT1G26110.2	miR414	1686	4.5	0.177034	0.867303	no	DCP5	miR414:DCP5	0.720784
AT4G25730.1	miR414	1554	4.5	0.0289969	0.867481	no	NA	miR414:AT4G25730.1	0.720784
AT4G26700.3	miR865-3p	169	5	0.192295	0.975039	no	ATFIM1	miR865-3p:ATFIM1	0.720784
AT1G63150.1	miR161.1	987	4	0.21824	0.25665	yes	NA	miR161.1:AT1G63150.1	0.722241
AT1G68440.1	miR414	419	4.5	0.0976737	0.807917	no	NA	miR414:AT1G68440.1	0.722366
AT2G25010.1	miR157c-3p	1514	5.5	0.134301	0.972522	no	NA	miR157c-3p:AT2G25010.1	0.722366
AT5G03940.1	miR831-3p	16	5.5	5.56282	0.964343	no	54CP	miR831-3p:54CP	0.722366
AT5G67360.1	miR5021	32	4	0.283864	0.852977	no	ARA12	miR5021:ARA12	0.722366
AT1G07110.1	miR167c-5p	2066	5	0.518891	0.975496	no	ATF2KP	miR167c-5p:ATF2KP	0.722548
AT5G65720.2	miR172b-5p	1019	5.5	0.355593	1.02421	no	ATNFS1	miR172b-5p:ATNFS1	0.724339
AT1G64470.1	miR841a-5p	724	5	0.146511	0.920368	no	NA	miR841a-5p:AT1G64470.1	0.725939
AT1G64500.1	miR4239	896	6	0.231975	1	no	NA	miR4239:AT1G64500.1	0.726606
AT5G44450.1	miR5662	38	5	0.66998	0.939068	no	NA	miR5662:AT5G44450.1	0.72805
AT5G63850.1	miR414	1720	4.5	0.11904	0.801146	no	AAP4	miR414:AAP4	0.730083
AT1G27300.1	miR854a	292	5	0.11904	0.958183	no	NA	miR854a:AT1G27300.1	0.730577
AT1G64680.1	miR5657	733	4.5	0.169403	0.793013	no	NA	miR5657:AT1G64680.1	0.730577
AT1G68600.1	miR773b-3p	1679	6	0.335753	1.00114	no	NA	miR773b-3p:AT1G68600.1	0.730577
AT3G01120.1	miR847	722	4.5	0.134301	0.796409	no	AtCGS1	miR847:AtCGS1	0.730577
AT5G61010.2	miR414	2589	4	0.169403	0.24147	no	ATEXO70E2	miR414:ATEXO70E2	0.734646
AT3G13930.1	miR5658	83	4	0.154141	0.555554	no	NA	miR5658:AT3G13930.1	0.736363
AT5G02050.1	miR414	500	4.5	0.129723	0.791498	no	NA	miR414:AT5G02050.1	0.738468
AT1G47400.1	miR414	213	5.5	0.0625722	1.01605	no	NA	miR414:AT1G47400.1	0.74115
AT5G55660.1	miR414	693	5	0.805808	0.911419	no	NA	miR414:AT5G55660.1	0.743262
AT1G08450.3	miR835-5p	1058	4.5	0.195347	0.756578	no	AtCRT3	miR835-5p:AtCRT3	0.744073
AT1G70780.1	miR172d-5p	414	4	0.256393	0.279421	no	NA	miR172d-5p:AT1G70780.1	0.744073
AT1G70782.1	miR172d-5p	414	4	0.256393	0.279421	no	CPuORF28	miR172d-5p:CPuORF28	0.744073
AT5G22080.2	miR847	594	4.5	0.256393	0.782369	no	NA	miR847:AT5G22080.2	0.744073
AT2G33730.1	miR390a-5p	2200	5	0.157194	0.925541	no	NA	miR390a-5p:AT2G33730.1	0.745327
AT3G10050.1	miR865-3p	1093	4.5	0.122092	0.786993	no	OMR1	miR865-3p:OMR1	0.747914
AT4G39210.1	miR834	340	5	0.143458	0.922437	no	APL3	miR834:APL3	0.747914
AT1G16890.3	miR5998a	491	5.5	1.0912	0.963438	no	UBC13B	miR5998a:UBC13B	0.748446
AT5G65930.3	miR393a-3p	3734	6	0.36475	1.08493	no	KCBP	miR393a-3p:KCBP	0.749217
AT5G19390.4	miR834	1404	5	0.141932	0.975236	no	NA	miR834:AT5G19390.4	0.752548
AT2G37400.1	miR838	729	6	0.175507	0.990994	no	NA	miR838:AT2G37400.1	0.754039
AT1G80640.2	miR390b-3p	1060	5.5	0.151089	0.962975	no	NA	miR390b-3p:AT1G80640.2	0.754563
AT3G04450.2	miR156j	214	5	0.0839383	0.941663	no	NA	miR156j:AT3G04450.2	0.754563
AT3G11540.2	miR158a-3p	1779	6	0.141932	0.985512	no	SPY	miR158a-3p:SPY	0.754563
AT5G40580.3	miR5015	315	5.5	0.135827	0.958776	no	PBB2	miR5015:PBB2	0.756992
AT4G29030.1	miR841b-5p	609	6	0.802756	1.08746	no	NA	miR841b-5p:AT4G29030.1	0.757545
AT3G50690.1	miR414	898	5	0.161772	0.962085	no	NA	miR414:AT3G50690.1	0.757724
AT3G45090.2	miR858b	2073	5	0.123618	0.954618	no	NA	miR858b:AT3G45090.2	0.758427
AT1G66400.1	miR395b	177	6	0.0915691	1.09157	no	CML23	miR395b:CML23	0.759451
AT1G50840.1	miR5021	22	6	0.152615	0.9818	no	POLGAMMA2	miR5021:POLGAMMA2	0.761455
AT4G25290.1	miR863-5p	2132	6	1.21634	0.988427	no	NA	miR863-5p:AT4G25290.1	0.765268
AT2G05812.1	miR156f-3p	1622	6	0.135827	0.989364	no	NA	miR156f-3p:AT2G05812.1	0.765824
AT2G04940.1	miR776	1179	5	0.161772	0.892176	no	NA	miR776:AT2G04940.1	0.765876
AT5G45560.1	miR5024-5p	2208	4.5	0.160246	0.788435	no	NA	miR5024-5p:AT5G45560.1	0.765876
AT1G13140.2	miR5656	1434	5.5	0.175507	0.968563	no	CYP86C3	miR5656:CYP86C3	0.767632
AT3G11330.1	miR5020a	128	6	0.209083	0.998739	no	PIRL9	miR5020a:PIRL9	0.767632
AT5G13010.1	miR773a	3992	4.5	0.134301	0.743806	no	EMB3011	miR773a:EMB3011	0.767632
AT1G07990.1	miR399b	2752	5.5	0.428849	1.00537	no	NA	miR399b:AT1G07990.1	0.768534
AT1G72175.1	miR156h	724	5	0.16635	0.998692	no	NA	miR156h:AT1G72175.1	0.768534
AT5G27430.1	miR5028	808	5	0.0732553	0.963026	no	NA	miR5028:AT5G27430.1	0.768534
AT1G08125.3	miR390a-3p	887	5	0.334227	0.892774	no	NA	miR390a-3p:AT1G08125.3	0.771092
AT1G75040.1	miR166a-5p	791	5.5	0.117514	0.956876	no	PR-5	miR166a-5p:PR-5	0.771102
AT2G35605.1	miR447a.2-3p	643	5.5	0.148037	1.01621	no	NA	miR447a.2-3p:AT2G35605.1	0.772698
AT4G39960.1	miR396a-5p	758	4.5	0.112935	0.842818	no	NA	miR396a-5p:AT4G39960.1	0.772765
AT4G37000.1	miR838	799	4.5	0.120566	0.726798	no	ACD2	miR838:ACD2	0.77489
AT3G17170.1	miR414	807	4.5	0.392221	0.75005	no	RFC3	miR414:RFC3	0.777806
AT1G22910.3	miR5658	1276	6	0.753919	1.07382	no	NA	miR5658:AT1G22910.3	0.779222
AT3G20790.1	miR4239	201	5.5	0.137354	1.00404	no	NA	miR4239:AT3G20790.1	0.779222
AT2G33040.1	miR824-5p	475	5.5	0.651667	1.01883	no	ATP3	miR824-5p:ATP3	0.781865
AT3G04790.1	miR396a-5p	213	4.5	0.172455	0.834826	no	EMB3119	miR396a-5p:EMB3119	0.782328
AT2G16900.3	miR5654-5p	1508	4.5	0.112935	0.799395	no	NA	miR5654-5p:AT2G16900.3	0.783762
AT4G28600.1	miR855	198	6	0.161772	1.04819	no	NPGR2	miR855:NPGR2	0.783984
AT1G53910.3	miR156i	1315	6	0.383064	0.995605	no	RAP2.12	miR156i:RAP2.12	0.78426
AT1G55960.1	miR5012	1176	4.5	0.122092	0.72207	no	NA	miR5012:AT1G55960.1	0.78426
AT1G62914.1	miR5654-5p	1550	6	0.0228923	0.992595	no	NA	miR5654-5p:AT1G62914.1	0.78426
AT1G75540.1	miR5021	396	5	0.173981	0.926528	no	AtBBX21	miR5021:AtBBX21	0.78426
AT3G06710.1	miR406	836	4.5	0.100726	0.768717	no	NA	miR406:AT3G06710.1	0.78426
AT4G27310.1	miR414	582	5	0.030523	0.889363	no	BBX28	miR414:BBX28	0.78426
AT4G31500.1	miR5024-3p	911	6	0.149563	0.980475	no	ATR4	miR5024-3p:ATR4	0.78426
AT1G12530.1	miR4239	495	4.5	0.108357	0.719592	no	NA	miR4239:AT1G12530.1	0.785368
AT3G58100.1	miR4243	471	5.5	0.161772	0.956044	no	PDCB5	miR4243:PDCB5	0.785368
AT3G62240.1	miR172e-3p	1929	5.5	0.189243	0.96412	no	NA	miR172e-3p:AT3G62240.1	0.785368
AT3G23605.1	miR5017-5p	419	6	0.163298	0.993483	no	NA	miR5017-5p:AT3G23605.1	0.785388
AT5G58800.2	miR839-5p	609	5	0.189243	0.945404	no	NA	miR839-5p:AT5G58800.2	0.789223
AT5G50310.1	miR414	1651	4.5	0.0930952	0.806359	no	NA	miR414:AT5G50310.1	0.79096
AT2G42670.2	miR5021	239	4	0.242658	0.795747	no	NA	miR5021:AT2G42670.2	0.792555
AT5G04040.1	miR5021	517	6	0.181612	0.971151	no	SDP1	miR5021:SDP1	0.792555
AT2G33830.2	miR823	129	6	0.462424	1.00104	no	NA	miR823:AT2G33830.2	0.793193
AT2G45580.1	miR447c-3p	1499	5.5	0.241132	0.946464	no	CYP76C3	miR447c-3p:CYP76C3	0.793193
AT5G02830.1	miR870-3p	1911	5.5	0.248763	0.948971	no	NA	miR870-3p:AT5G02830.1	0.793193
AT1G05180.3	miR859	1727	4.5	0.111409	0.747496	no	AXR1	miR859:AXR1	0.797363
AT2G30260.1	miR857	329	4.5	0.288443	0.695283	no	U2B''	miR857:U2B''	0.797363
AT1G74050.1	miR859	113	5	0.180086	0.959069	no	NA	miR859:AT1G74050.1	0.797582
AT5G35620.2	miR838	995	5	0.112935	0.940664	no	EIF(ISO)4E	miR838:EIF(ISO)4E	0.797582
AT3G51990.1	miR5998a	1291	5.5	0.117514	1.00965	no	NA	miR5998a:AT3G51990.1	0.797673
AT3G61640.1	miR1886.1	70	5	0.13888	0.97901	no	AGP20	miR1886.1:AGP20	0.797673
AT5G16940.2	miR161.1	377	5.5	0.253341	0.95245	no	NA	miR161.1:AT5G16940.2	0.797924
AT1G61930.1	miR414	544	5	0.173981	0.879896	no	NA	miR414:AT1G61930.1	0.800921
AT3G44750.2	miR414	472	4.5	0.322018	0.716351	no	ATHD2A	miR414:ATHD2A	0.800936
AT1G70190.2	miR165a-5p	96	5	0.160246	0.941777	no	NA	miR165a-5p:AT1G70190.2	0.801198
AT2G47450.1	miR5021	194	4	0.141932	0.899068	no	CAO	miR5021:CAO	0.801198
AT1G14510.1	miR414	839	4.5	0.187717	0.706695	no	AL7	miR414:AL7	0.803348
AT1G60640.5	miR414	259	4.5	0.254867	0.711133	no	NA	miR414:AT1G60640.5	0.803348
AT1G77840.1	miR173-5p	1055	6	0.169403	0.97209	no	NA	miR173-5p:AT1G77840.1	0.803348
AT3G16560.1	miR173-3p	1175	5	0.0915691	0.890444	no	NA	miR173-3p:AT3G16560.1	0.803348
AT4G11080.1	miR5648-3p	11	5.5	0.129723	0.94752	no	3xHMG-box1	miR5648-3p:3xHMG-box1	0.803348
AT5G58130.1	miR414	1430	5.5	0.154141	0.943837	no	ROS3	miR414:ROS3	0.803348
AT5G65685.2	miR415	111	4	0.340332	0.648993	no	NA	miR415:AT5G65685.2	0.803348
AT5G27270.1	miR400	2333	4.5	0.0976737	0.738258	no	EMB976	miR400:EMB976	0.804313
AT5G42230.1	miR865-5p	728	4.5	0.0259446	0.833797	no	scpl41	miR865-5p:scpl41	0.806823
AT5G59290.2	miR2112-5p	630	4.5	0.184664	0.859395	no	ATUXS3	miR2112-5p:ATUXS3	0.807588
AT1G70610.1	miR827	1502	4.5	0.163298	0.7784	no	ABCB26	miR827:ABCB26	0.807955
AT1G72440.1	miR414	2929	4.5	0.782916	0.693631	no	EDA25	miR414:EDA25	0.809572
AT3G22070.1	miR5021	200	4	0.00763076	0.774712	no	NA	miR5021:AT3G22070.1	0.809572
AT3G29075.1	miR414	714	4.5	0.262498	0.694437	no	NA	miR414:AT3G29075.1	0.809572
AT2G06000.2	miR773a	1738	5	0.335753	0.859562	no	NA	miR773a:AT2G06000.2	0.809961
AT2G42790.1	miR8178	1264	4.5	0.0778337	0.729407	no	CSY3	miR8178:CSY3	0.810426
AT5G02840.3	miR1886.1	15	5.5	1.85733	0.951711	no	LCL1	miR1886.1:LCL1	0.810426
AT3G50690.1	miR414	1096	5.5	0.395273	0.939378	no	NA	miR414:AT3G50690.1	0.81048
AT5G06350.1	miR165a-5p	1072	4.5	0.131249	0.59146	no	NA	miR165a-5p:AT5G06350.1	0.81048
AT3G03702.1	miR5658	1364	6	0.117514	0.981239	no	NA	miR5658:AT3G03702.1	0.810912
AT1G53090.2	miR5021	124	5	0.0366276	0.905364	no	SPA4	miR5021:SPA4	0.812955
AT3G48760.1	miR779.1	1498	5	0.219766	0.859176	no	NA	miR779.1:AT3G48760.1	0.812955
AT1G76810.1	miR414	511	4.5	0.18619	0.677488	no	NA	miR414:AT1G76810.1	0.81449
AT2G42680.1	miR869.1	79	5	0.11904	0.866469	no	ATMBF1A	miR869.1:ATMBF1A	0.81449
AT1G08340.1	miR5637	1200	6	0.148037	0.976631	no	NA	miR5637:AT1G08340.1	0.816327
AT1G19700.3	miR403-3p	1505	6	0.180086	0.979728	no	BEL10	miR403-3p:BEL10	0.816327
AT1G79970.2	miR390a-5p	542	5	0.131249	0.879039	no	NA	miR390a-5p:AT1G79970.2	0.816327
AT5G11160.1	miR5660	498	6	0.135827	0.978954	no	APT5	miR5660:APT5	0.816327
AT3G46590.3	miR775	988	4.5	0.0930952	0.691192	no	ATTRP2	miR775:ATTRP2	0.819908
AT3G17340.2	miR414	3014	6	0.177034	1.03767	no	NA	miR414:AT3G17340.2	0.820534
AT5G22650.2	miR414	587	4.5	1.54599	0.767982	no	ATHD2	miR414:ATHD2	0.820534
AT2G31580.1	miR4239	826	6	0.209083	1.03528	no	NA	miR4239:AT2G31580.1	0.821679
AT3G59490.2	miR4239	841	6	0.260972	1.03508	no	NA	miR4239:AT3G59490.2	0.821679
AT5G64740.1	miR773b-3p	3248	6	0.346436	1.04254	no	CESA6	miR773b-3p:CESA6	0.821828
AT1G12370.2	miR5638b	1567	5.5	0.13888	0.997327	no	PHR1	miR5638b:PHR1	0.822443
AT2G22730.1	miR5640	130	6	0.117514	0.979926	no	NA	miR5640:AT2G22730.1	0.822958
AT5G46170.1	miR414	567	5.5	0.131249	0.93327	no	NA	miR414:AT5G46170.1	0.824771
AT3G29075.1	miR414	867	4.5	0.103778	0.657946	no	NA	miR414:AT3G29075.1	0.825257
AT3G17230.1	miR165a-5p	678	6	0.050363	0.989932	no	NA	miR165a-5p:AT3G17230.1	0.827868
AT1G33810.1	miR774b-5p	377	5.5	0.169403	1.00789	no	NA	miR774b-5p:AT1G33810.1	0.828585
AT4G04700.1	miR2934-3p	859	5.5	0.132775	0.993309	no	CPK27	miR2934-3p:CPK27	0.82925
AT5G08280.1	miR847	1357	4.5	1.50021	0.642137	no	HEMC	miR847:HEMC	0.830134
AT3G55410.1	miR840-3p	2449	5.5	0.163298	0.922541	no	NA	miR840-3p:AT3G55410.1	0.831597
AT4G09010.1	miR5021	203	4	0.190769	0.745045	no	APX4	miR5021:APX4	0.833271
AT1G69550.1	miR396b-5p	2232	5	0.129723	0.854544	no	NA	miR396b-5p:AT1G69550.1	0.834883
AT3G25150.2	miR171c-5p	1118	6	0.141932	1.04614	no	NA	miR171c-5p:AT3G25150.2	0.835071
AT1G49620.1	miR5658	736	6	0.152615	0.974202	no	ICK5	miR5658:ICK5	0.83532
AT2G40430.3	miR773b-3p	766	5	0.129723	0.831507	no	NA	miR773b-3p:AT2G40430.3	0.837073
AT1G20980.1	miR831-5p	3804	4.5	0.152615	0.667622	no	ATSPL14	miR831-5p:ATSPL14	0.837479
AT1G48480.1	miR5021	51	4	0.0167877	0.870629	no	RKL1	miR5021:RKL1	0.841402
AT4G34920.1	miR5021	35	4	0.132775	0.869908	no	NA	miR5021:AT4G34920.1	0.841402
AT2G41540.3	miR396b-5p	447	5.5	0.128197	0.929582	no	GPDHC1	miR396b-5p:GPDHC1	0.841454
AT1G68890.1	miR393a-3p	602	5.5	0.117514	0.926605	no	PHYLLO	miR393a-3p:PHYLLO	0.842041
AT4G27690.2	miR773b-3p	529	6	0.213661	1.03649	no	VPS26B	miR773b-3p:VPS26B	0.84226
AT3G58730.1	miR861-3p	884	4.5	0.0976737	0.640327	no	NA	miR861-3p:AT3G58730.1	0.844694
AT5G60030.1	miR773a	424	4.5	0.2976	0.729045	no	NA	miR773a:AT5G60030.1	0.845332
AT5G15540.2	miR5028	3233	5.5	0.117514	0.987859	no	ATSCC2	miR5028:ATSCC2	0.847356
AT5G52520.1	miR840-3p	1615	5	0.112935	0.828456	no	OVA6	miR840-3p:OVA6	0.849664
AT3G15840.5	miR4239	802	6	0.541784	1.02642	no	PIFI	miR4239:PIFI	0.850047
AT1G80070.1	miR5649a	7278	6	0.192295	1.03306	no	EMB14	miR5649a:EMB14	0.850911
AT2G04842.1	miR837-5p	1717	4.5	0.180086	0.68779	no	EMB2761	miR837-5p:EMB2761	0.850911
AT2G19860.2	miR5016	1393	5.5	0.143458	0.977813	no	ATHXK2	miR5016:ATHXK2	0.850911
AT2G35490.1	miR865-3p	476	6	0.213661	1.02184	no	NA	miR865-3p:AT2G35490.1	0.850911
AT2G39340.1	miR860	3066	5.5	0.111409	0.987793	no	AtSAC3A	miR860:AtSAC3A	0.850911
AT3G07320.1	miR5021	78	6	0.210609	1.02454	no	NA	miR5021:AT3G07320.1	0.850911
AT4G38800.1	miR3434-3p	767	5.5	0.289969	0.978015	no	ATMTAN1	miR3434-3p:ATMTAN1	0.850911
AT4G39890.1	miR156h	47	4	0.11904	0.711719	no	AtRABH1c	miR156h:AtRABH1c	0.850911
AT5G18310.2	miR5021	246	4	0.172455	0.86006	no	NA	miR5021:AT5G18310.2	0.850911
AT5G25040.3	miR823	1030	6	0.135827	1.04055	no	NA	miR823:AT5G25040.3	0.850911
AT5G35680.3	miR414	514	4.5	0.114461	0.704702	no	NA	miR414:AT5G35680.3	0.850911
AT1G10390.2	miR5028	2626	6	0.181612	0.979753	no	NA	miR5028:AT1G10390.2	0.851686
AT1G55820.1	miR5645a	771	6	0.132775	0.967416	no	NA	miR5645a:AT1G55820.1	0.851686
AT1G62750.1	miR842	2095	5	0.405956	0.839598	no	ATSCO1	miR842:ATSCO1	0.851686
AT2G36990.1	miR390a-3p	1611	5	0.134301	0.841493	no	ATSIG6	miR390a-3p:ATSIG6	0.851686
AT2G44940.1	miR5021	989	6	0.140406	0.94919	no	NA	miR5021:AT2G44940.1	0.851686
AT3G53710.2	miR4221	1038	5.5	0.173981	0.913327	no	AGD6	miR4221:AGD6	0.851686
AT4G04320.2	miR4221	1366	5.5	0.148037	0.913756	no	NA	miR4221:AT4G04320.2	0.851686
AT5G12150.2	miR5021	2722	4	0.302178	0.716865	no	NA	miR5021:AT5G12150.2	0.851686
AT5G22010.1	miR414	445	5.5	0.131249	0.920521	no	AtRFC1	miR414:AtRFC1	0.851686
AT5G27430.1	miR5021	26	5.5	0.201452	0.914078	no	NA	miR5021:AT5G27430.1	0.851686
AT5G39660.2	miR5021	119	5.5	0.235027	0.912087	no	CDF2	miR5021:CDF2	0.851686
AT5G45170.1	miR416	767	6	0.279286	0.973295	no	NA	miR416:AT5G45170.1	0.851686
AT5G65560.1	miR161.2	1207	5	0.160246	0.84355	no	NA	miR161.2:AT5G65560.1	0.851686
AT1G65370.1	miR5655	1157	4	0.27776	0.215272	no	NA	miR5655:AT1G65370.1	0.852684
AT1G75660.1	miR5658	3168	5	0.282338	0.845108	no	AtXRN3	miR5658:AtXRN3	0.852684
AT2G43710.2	miR157a-3p	517	5	0.0946214	0.824187	no	FAB2	miR157a-3p:FAB2	0.852684
AT3G16640.1	miR414	276	4.5	0.966054	0.580488	no	TCTP	miR414:TCTP	0.852684
AT3G17160.1	miR414	344	5	0.427322	0.8386	no	NA	miR414:AT3G17160.1	0.852684
AT4G22200.1	miR5650	1678	6	0.367802	0.974979	no	AKT2	miR5650:AKT2	0.852684
AT4G38590.2	miR414	2566	5	0.00152615	0.839999	no	BGAL14	miR414:BGAL14	0.852684
AT1G15860.3	miR829-5p	851	5	0.192295	0.845279	no	NA	miR829-5p:AT1G15860.3	0.856085
AT5G23940.1	miR3440b-3p	713	4.5	0.190769	0.541369	no	DCR	miR3440b-3p:DCR	0.856678
AT3G03710.1	miR156j	149	5	0.01984	0.881304	no	PDE326	miR156j:PDE326	0.857322
AT4G37270.1	miR5658	386	6	0.0946214	0.965018	no	ATHMA1	miR5658:ATHMA1	0.857322
AT1G73760.1	miR5022	834	5	0.123618	0.841187	no	NA	miR5022:AT1G73760.1	0.859614
AT3G15395.4	miR5021	63	4	0.148037	0.697656	no	NA	miR5021:AT3G15395.4	0.859846
AT4G28190.2	miR831-3p	636	5.5	0.172455	0.977106	no	ULT	miR831-3p:ULT	0.862322
AT1G76550.1	miR5020c	1903	5.5	0.137354	0.992013	no	NA	miR5020c:AT1G76550.1	0.862517
AT4G37470.1	miR860	1002	5	0.17856	0.910403	no	KAI2	miR860:KAI2	0.862986
AT1G80770.2	miR169d	807	5	0.819543	0.843025	no	PDE318	miR169d:PDE318	0.865584
AT2G33810.1	miR5021	287	4	7.3179	0.691108	no	SPL3	miR5021:SPL3	0.865584
AT2G47220.1	miR156j	260	5	0.105304	0.877611	no	ATDUF5	miR156j:ATDUF5	0.865584
AT3G16170.1	miR858b	1565	4.5	0.296073	0.385452	no	AAE13	miR858b:AAE13	0.865584
AT3G49601.1	miR414	738	4.5	0.105304	0.540784	no	NA	miR414:AT3G49601.1	0.865584
AT5G11540.1	miR5663-3p	1722	6	0.128197	0.968556	no	AtGulLO3	miR5663-3p:AtGulLO3	0.865584
AT2G43465.1	miR865-5p	1156	5	0.262498	0.904839	no	NA	miR865-5p:AT2G43465.1	0.86828
AT5G65630.1	miR774b-5p	1042	5.5	0.152615	0.986932	no	GTE7	miR774b-5p:GTE7	0.86828
AT2G46900.1	miR393b-3p	282	5.5	0.0869906	0.974016	no	NA	miR393b-3p:AT2G46900.1	0.868447
AT1G10650.2	miR5021	215	6	0.291495	0.941062	no	NA	miR5021:AT1G10650.2	0.870288
AT1G22850.1	miR414	1074	4.5	0.361698	0.522011	no	NA	miR414:AT1G22850.1	0.870288
AT2G25670.2	miR414	655	4.5	0.456319	0.519672	no	NA	miR414:AT2G25670.2	0.870288
AT3G55605.1	miR414	472	5.5	0.132775	0.909341	no	NA	miR414:AT3G55605.1	0.870288
AT3G03720.2	miR832-3p	2046	5	0.137354	0.817831	no	CAT4	miR832-3p:CAT4	0.870554
AT3G45930.1	miR172d-5p	506	4.5	0.154141	0.510201	no	NA	miR172d-5p:AT3G45930.1	0.870554
AT4G16155.1	miR158a-5p	1815	5.5	0.514313	0.908445	no	NA	miR158a-5p:AT4G16155.1	0.871882
AT5G03160.1	miR172c	1436	5	0.170929	0.820368	no	ATP58IPK	miR172c:ATP58IPK	0.871882
AT2G03470.2	miR5013	978	6	0.413587	0.956623	no	NA	miR5013:AT2G03470.2	0.872734
AT5G44660.1	miR5998a	1339	4.5	0.221292	0.250135	no	NA	miR5998a:AT5G44660.1	0.873591
AT1G29930.1	miR842	223	4.5	0.152615	0.387058	no	AB140	miR842:AB140	0.874876
AT2G16485.1	miR773b-3p	4806	6	0.152615	0.954502	no	NERD	miR773b-3p:NERD	0.877768
AT1G01510.1	miR5633	1715	5	0.167877	0.907501	no	AN	miR5633:AN	0.877858
AT1G43910.1	miR414	985	5.5	0.170929	0.904509	no	NA	miR414:AT1G43910.1	0.878068
AT1G57750.2	miR414	1303	5	1.4529	0.817004	no	CYP96A15	miR414:CYP96A15	0.878068
AT2G27030.3	miR837-5p	445	5	0.724922	0.807177	no	ACAM-2	miR837-5p:ACAM-2	0.878068
AT3G02170.1	miR5998a	2941	5	0.16635	0.806808	no	LNG2	miR5998a:LNG2	0.878068
AT3G04730.1	miR391-3p	784	4.5	0.306756	0.282659	no	IAA16	miR391-3p:IAA16	0.878068
AT3G16260.1	miR779.1	2704	5.5	0.199926	0.901404	no	TRZ4	miR779.1:TRZ4	0.878068
AT3G24480.1	miR854a	35	5.5	0.0839383	0.941663	no	NA	miR854a:AT3G24480.1	0.878068
AT4G02450.2	miR414	735	4.5	0.648614	0.465573	no	NA	miR414:AT4G02450.2	0.878068
AT5G09410.3	miR159b-3p	2769	5	0.0946214	0.793197	no	CAMTA1	miR159b-3p:CAMTA1	0.878068
AT5G24930.1	miR847	1463	4.5	0.144984	0.455177	no	ATCOL4	miR847:ATCOL4	0.878068
AT3G63460.3	miR838	1766	6	0.140406	0.950397	no	NA	miR838:AT3G63460.3	0.878123
AT3G52370.1	miR854a	100	5.5	0.126671	1.00272	no	FLA15	miR854a:FLA15	0.878647
AT3G11964.1	miR5998a	4849	5.5	0.115988	0.905853	no	NA	miR5998a:AT3G11964.1	0.881345
AT3G16565.2	miR773a	561	5.5	0.196874	0.891953	no	NA	miR773a:AT3G16565.2	0.881345
AT3G24200.2	miR5648-3p	1720	6	0.354067	0.952751	no	NA	miR5648-3p:AT3G24200.2	0.881345
AT3G59280.1	miR159c	478	5	0.25792	0.822398	no	TXR1	miR159c:TXR1	0.881345
AT4G06634.3	miR4221	1187	6	0.117514	0.954382	no	AtYY1	miR4221:AtYY1	0.881345
AT4G20440.4	miR5633	960	6	0.250289	0.951234	no	smB	miR5633:smB	0.881345
AT4G36980.4	miR773a	1571	6	0.173981	0.948227	no	NA	miR773a:AT4G36980.4	0.881345
AT5G24735.1	miR849	477	4.5	0.537205	0.582475	no	NA	miR849:AT5G24735.1	0.881345
AT5G64560.2	miR5015	1058	6	0.141932	0.956535	no	ATMGT9	miR5015:ATMGT9	0.881345
AT3G09000.1	miR5021	108	4	0.192295	0.815287	no	NA	miR5021:AT3G09000.1	0.881351
AT4G29900.1	miR5016	3175	5.5	0.17856	0.965011	no	ACA10	miR5016:ACA10	0.884951
AT1G01940.1	miR169a-5p	419	5.5	0.131249	0.903687	no	NA	miR169a-5p:AT1G01940.1	0.886069
AT3G11130.1	miR390b-3p	3787	5	0.167877	0.898971	no	NA	miR390b-3p:AT3G11130.1	0.886228
AT5G44620.1	miR396a-5p	864	5.5	0.346436	0.972444	no	CYP706A3	miR396a-5p:CYP706A3	0.886228
AT1G07930.2	miR414	1061	4.5	0.100726	0.384203	no	NA	miR414:AT1G07930.2	0.886617
AT1G20010.1	miR847	1426	5	0.259446	0.795612	no	TUB5	miR847:TUB5	0.886617
AT1G10940.2	miR847	1460	5.5	0.274707	0.961992	no	ASK1	miR847:ASK1	0.887373
AT2G31800.1	miR781a	1747	5	0.163298	0.802156	no	NA	miR781a:AT2G31800.1	0.888172
AT3G22220.2	miR5021	2600	5	0.00152615	0.857561	no	NA	miR5021:AT3G22220.2	0.888172
AT3G50690.1	miR414	577	5.5	0.122092	0.896372	no	NA	miR414:AT3G50690.1	0.888172
AT4G14500.2	miR5021	64	5	0.173981	0.855434	no	NA	miR5021:AT4G14500.2	0.888172
AT4G38430.1	miR397a	1701	5.5	0.381538	0.901418	no	ATROPGEF1	miR397a:ATROPGEF1	0.888172
AT5G01880.1	miR5658	1106	6	0.160246	0.947647	no	NA	miR5658:AT5G01880.1	0.888172
AT5G01881.1	miR5658	167	6	0.160246	0.947647	no	NA	miR5658:AT5G01881.1	0.888172
AT5G40580.3	miR5021	41	5.5	0.144984	0.885511	no	PBB2	miR5021:PBB2	0.888172
AT1G07940.2	miR414	1411	4.5	0.190769	0.3296	no	NA	miR414:AT1G07940.2	0.888542
AT1G63130.1	miR5654-5p	1684	6	0.0900429	0.949484	no	TAS8	miR5654-5p:TAS8	0.888542
AT2G16600.2	miR773b-5p	405	5	4.12366	0.847522	no	ROC3	miR773b-5p:ROC3	0.888542
AT3G04260.1	miR414	1975	5	0.137354	0.798552	no	PDE324	miR414:PDE324	0.888542
AT3G21300.1	miR156g	1248	4.5	0.125144	0.670073	no	NA	miR156g:AT3G21300.1	0.888542
AT4G27270.1	miR858a	578	5.5	0.152615	0.892466	no	NA	miR858a:AT4G27270.1	0.888542
AT5G11600.1	miR414	772	5	0.13888	0.802202	no	NA	miR414:AT5G11600.1	0.888542
AT5G58130.1	miR829-5p	2363	5.5	0.128197	0.897965	no	ROS3	miR829-5p:ROS3	0.888542
AT5G59720.1	miR826a	252	5.5	0.192295	0.897729	no	HSP18.2	miR826a:HSP18.2	0.888542
AT4G37200.1	miR5021	375	4	0.135827	0.800913	no	HCF164	miR5021:HCF164	0.889245
AT1G07920.1	miR414	1280	4.5	0.183138	0.269066	no	NA	miR414:AT1G07920.1	0.891136
AT4G23820.1	miR870-5p	1356	5	0.157194	0.814227	no	NA	miR870-5p:AT4G23820.1	0.891136
AT1G63320.1	miR5654-5p	237	6	0.01984	0.947536	no	NA	miR5654-5p:AT1G63320.1	0.892622
AT2G01470.1	miR5021	194	4	0.146511	0.623313	no	ATSEC12	miR5021:ATSEC12	0.892622
AT4G20930.1	miR868-3p	747	5	0.283864	0.889975	no	NA	miR868-3p:AT4G20930.1	0.89301
AT4G22840.1	miR171c-5p	885	6	0.21824	0.959147	no	NA	miR171c-5p:AT4G22840.1	0.893528
AT5G50970.1	miR774b-5p	1541	5.5	0.105304	0.907296	no	NA	miR774b-5p:AT5G50970.1	0.893528
AT5G25900.1	miR8167a	75	6	0.15872	0.96566	no	ATKO1	miR8167a:ATKO1	0.893869
AT3G58570.1	miR394a	1144	6	0.131249	0.94517	no	NA	miR394a:AT3G58570.1	0.894498
AT5G12890.1	miR865-3p	1125	5	0.080886	0.796456	no	NA	miR865-3p:AT5G12890.1	0.89685
AT4G33350.2	miR4228-3p	215	6	0.140406	0.95282	no	AtTic22-IV	miR4228-3p:AtTic22-IV	0.897372
AT1G06180.1	miR1886.2	482	5.5	0.103778	0.900404	no	ATMYB13	miR1886.2:ATMYB13	0.898511
AT2G39260.1	miR414	3009	5	0.108357	0.787475	no	NA	miR414:AT2G39260.1	0.898511
AT4G38510.5	miR5654-3p	1550	6	0.346436	0.961842	no	AtVAB2	miR5654-3p:AtVAB2	0.898511
AT2G19710.1	miR5641	10	5	0.122092	0.809522	no	NA	miR5641:AT2G19710.1	0.89875
AT5G45940.2	miR1886.3	538	5.5	0.230449	0.893599	no	AtNUDT11	miR1886.3:AtNUDT11	0.902429
AT2G28600.1	miR162a-5p	1576	5.5	0.132775	0.86889	no	NA	miR162a-5p:AT2G28600.1	0.902493
AT2G47350.2	miR5658	375	6	0.134301	0.93815	no	NA	miR5658:AT2G47350.2	0.902493
AT3G50690.1	miR865-3p	12	5.5	0.11904	0.887442	no	NA	miR865-3p:AT3G50690.1	0.902493
AT3G55520.1	miR780.1	724	5	0.418165	0.760899	no	NA	miR780.1:AT3G55520.1	0.902493
AT5G36880.2	miR857	1913	6	0.30523	0.954254	no	ACS	miR857:ACS	0.902493
AT5G42770.2	miR837-5p	691	5.5	0.157194	0.88762	no	NA	miR837-5p:AT5G42770.2	0.902493
AT1G10890.1	miR5641	1086	5.5	0.144984	0.891827	no	NA	miR5641:AT1G10890.1	0.903077
AT3G03050.1	miR773b-5p	3531	6	0.140406	0.998664	no	ATCSLD3	miR773b-5p:ATCSLD3	0.903418
AT4G26080.1	miR838	1104	6	0.1984	0.998728	no	ABI1	miR838:ABI1	0.903418
AT4G30210.2	miR414	581	5.5	0.148037	0.955541	no	AR2	miR414:AR2	0.903418
AT5G04140.2	miR773b-3p	3494	6	0.425796	1.00646	no	FD-GOGAT	miR773b-3p:FD-GOGAT	0.903418
AT5G05570.2	miR390a-5p	1989	5.5	0.132775	0.896166	no	NA	miR390a-5p:AT5G05570.2	0.904646
AT2G31060.3	miR773b-3p	1561	5.5	0.0976737	0.868396	no	EMB2785	miR773b-3p:EMB2785	0.904836
AT3G07830.1	miR833a-5p	983	6	0.122092	0.942326	no	NA	miR833a-5p:AT3G07830.1	0.904836
AT3G08550.1	miR5021	49	4	0.11904	0.575886	no	ABI8	miR5021:ABI8	0.904836
AT3G11700.1	miR5021	200	6	0.123618	0.912046	no	FLA18	miR5021:FLA18	0.904836
AT4G18930.1	miR4221	475	5.5	0.144984	0.872129	no	NA	miR4221:AT4G18930.1	0.904836
AT4G39480.1	miR5021	1108	6	0.177034	0.912451	no	CYP96A9	miR5021:CYP96A9	0.904836
AT5G50830.2	miR414	783	5.5	0.117514	0.878787	no	NA	miR414:AT5G50830.2	0.904836
AT2G41530.1	miR5021	101	4	0.209083	0.57068	no	ATSFGH	miR5021:ATSFGH	0.905031
AT2G17790.1	miR5661	876	5	0.274707	0.769637	no	VPS35A	miR5661:VPS35A	0.905263
AT5G53800.1	miR396b-5p	854	5.5	0.534153	0.880831	no	NA	miR396b-5p:AT5G53800.1	0.905263
AT1G73110.1	miR865-3p	765	5.5	0.112935	0.881534	no	NA	miR865-3p:AT1G73110.1	0.907551
AT3G23310.1	miR169a-3p	1604	6	0.148037	0.934181	no	NA	miR169a-3p:AT3G23310.1	0.907551
AT5G41170.1	miR161.1	882	4.5	0.468528	0.0856679	yes	NA	miR161.1:AT5G41170.1	0.907551
AT4G31290.1	miR167a-3p	649	5.5	0.294547	0.87246	no	NA	miR167a-3p:AT4G31290.1	0.90803
AT2G04690.2	miR5021	172	4	0.357119	0.77108	no	NA	miR5021:AT2G04690.2	0.908256
AT2G47830.2	miR396b-3p	1135	5.5	0.111409	0.965528	no	NA	miR396b-3p:AT2G47830.2	0.90853
AT5G55920.1	miR396a-5p	231	5.5	0.105304	0.961499	no	OLI2	miR396a-5p:OLI2	0.90853
AT1G73430.2	miR5021	132	4	0.262498	0.552511	no	NA	miR5021:AT1G73430.2	0.910724
AT2G22010.2	miR5021	127	6	0.68982	0.90517	no	RKP	miR5021:RKP	0.911595
AT3G19780.2	miR833a-3p	3184	5	0.590621	0.761737	no	NA	miR833a-3p:AT3G19780.2	0.911595
AT4G30200.4	miR8171	1181	5.5	0.50363	0.885021	no	VEL1	miR8171:VEL1	0.911595
AT5G06410.1	miR413	653	5.5	0.146511	0.877372	no	NA	miR413:AT5G06410.1	0.911595
AT3G18820.1	miR472-3p	252	5.5	0.126671	0.928324	no	ATRAB7B	miR472-3p:ATRAB7B	0.916772
AT4G31580.2	miR157a-3p	269	6	0.270129	0.996409	no	At-RSZ22	miR157a-3p:At-RSZ22	0.916772
AT1G64530.1	miR156i	27	5	0.180086	0.836623	no	NA	miR156i:AT1G64530.1	0.917581
AT3G26180.2	miR8184	1200	5.5	0.216713	0.873937	no	CYP71B20	miR8184:CYP71B20	0.917581
AT5G23090.4	miR5655	872	5	0.125144	0.80728	no	NF-YB13	miR5655:NF-YB13	0.917581
AT1G07040.1	miR5657	1219	5.5	0.230449	0.870444	no	NA	miR5657:AT1G07040.1	0.920778
AT1G63070.1	miR5654-5p	1440	6	0.0274707	0.929582	no	NA	miR5654-5p:AT1G63070.1	0.920778
AT3G59040.2	miR414	2005	6	0.103778	0.935337	no	NA	miR414:AT3G59040.2	0.920778
AT5G01350.1	miR156j	459	4.5	0.511261	0.591105	no	NA	miR156j:AT5G01350.1	0.920778
AT2G20835.1	miR5019	291	6	0.129723	0.998651	no	NA	miR5019:AT2G20835.1	0.921417
AT3G06580.1	miR397a	1212	6	0.135827	0.939412	no	GAL1	miR397a:GAL1	0.922245
AT1G01080.2	miR5021	321	6	0.161772	0.99218	no	NA	miR5021:AT1G01080.2	0.922269
AT4G30720.1	miR773b-5p	2245	5.5	0.227397	0.956018	no	PDE327	miR773b-5p:PDE327	0.923553
AT1G21900.1	miR839-5p	569	6	0.148037	0.99078	no	p24delta5	miR839-5p:p24delta5	0.925392
AT2G43240.2	miR5640	1580	5	0.126671	0.876521	no	NA	miR5640:AT2G43240.2	0.927462
AT1G32160.1	miR390b-3p	1108	5	0.135827	0.866161	no	NA	miR390b-3p:AT1G32160.1	0.928526
AT1G35420.2	miR414	323	5	0.114461	0.84593	no	NA	miR414:AT1G35420.2	0.928526
AT5G20350.1	miR5021	1437	5.5	0.143458	0.959039	no	TIP1	miR5021:TIP1	0.929365
AT5G23540.2	miR8121	558	5	0.0824122	0.741697	no	NA	miR8121:AT5G23540.2	0.929365
AT1G62930.1	miR5654-5p	1557	6	0.0351015	0.989785	no	RPF3	miR5654-5p:RPF3	0.931567
AT3G44590.2	miR156a-3p	153	5	0.18619	0.825762	no	NA	miR156a-3p:AT3G44590.2	0.931567
AT1G75330.1	miR829-5p	305	5	0.190769	0.74221	no	OTC	miR829-5p:OTC	0.931854
AT2G02230.1	miR161.2	151	5.5	0.141932	0.857838	no	AtPP2-B1	miR161.2:AtPP2-B1	0.931854
AT3G23710.1	miR5648-3p	761	5.5	0.184664	0.868045	no	AtTic22-III	miR5648-3p:AtTic22-III	0.931854
AT4G35830.2	miR5021	3068	4	0.170929	0.504022	no	ACO1	miR5021:ACO1	0.931854
AT5G26960.1	miR416	893	6	0.160246	0.933681	no	NA	miR416:AT5G26960.1	0.931854
AT1G12080.2	miR838	461	5.5	1.0912	0.937724	no	NA	miR838:AT1G12080.2	0.933679
AT1G22910.3	miR5020a	1205	5	0.177034	0.86053	no	NA	miR5020a:AT1G22910.3	0.933679
AT3G02520.1	miR868-3p	1078	5	0.131249	0.850788	no	GF14 NU	miR868-3p:GF14 NU	0.933679
AT1G28060.1	miR5658	2410	4.5	0.0991998	0.252341	no	NA	miR5658:AT1G28060.1	0.937169
AT1G47970.1	miR414	263	5	0.25792	0.736429	no	NA	miR414:AT1G47970.1	0.937346
AT1G56200.2	miR414	377	5	0.146511	0.828965	no	EMB1303	miR414:EMB1303	0.939298
AT1G79930.2	miR397a	787	6	0.0732553	0.988752	no	AtHsp70-14	miR397a:AtHsp70-14	0.939298
AT5G17700.1	miR8168	1416	6	0.24571	0.998776	no	NA	miR8168:AT5G17700.1	0.939298
AT1G75630.2	miR5658	743	5.5	0.222818	0.845869	no	AVA-P4	miR5658:AVA-P4	0.940203
AT4G01290.2	miR835-5p	3216	6	0.132775	0.92521	no	NA	miR835-5p:AT4G01290.2	0.940203
AT3G05490.1	miR868-3p	316	6	0.160246	0.924597	no	RALFL22	miR868-3p:RALFL22	0.940861
AT3G04790.1	miR1886.1	13	5.5	0.558571	0.873422	no	EMB3119	miR1886.1:EMB3119	0.94105
AT3G24200.2	miR773b-3p	958	6	0.0885168	0.920025	no	NA	miR773b-3p:AT3G24200.2	0.94105
AT1G47970.1	miR414	206	5	0.126671	0.824629	no	NA	miR414:AT1G47970.1	0.942042
AT1G63080.1	miR5654-5p	1600	6	0.0167877	0.983758	no	NA	miR5654-5p:AT1G63080.1	0.942069
AT4G22220.1	miR172b-5p	545	5	0.447162	0.775188	no	ATISU1	miR172b-5p:ATISU1	0.94345
AT4G28780.1	miR829-5p	831	6	0.268603	0.92541	no	NA	miR829-5p:AT4G28780.1	0.94345
AT1G51940.1	miR4228-5p	1603	5.5	0.152615	0.847404	no	LYK3	miR4228-5p:LYK3	0.943839
AT3G07630.2	miR158a-5p	525	5	0.114461	0.718571	no	ADT2	miR158a-5p:ADT2	0.943839
AT3G26740.1	miR5658	208	5	0.23808	0.732008	no	CCL	miR5658:CCL	0.943839
AT3G45140.1	miR319c	938	6	0.204504	0.919603	no	ATLOX2	miR319c:ATLOX2	0.94441
AT3G01740.1	miR863-3p	602	5	0.122092	0.754681	no	NA	miR863-3p:AT3G01740.1	0.944922
AT5G58100.1	miR5998a	1488	5	0.221292	0.688533	no	NA	miR5998a:AT5G58100.1	0.944922
AT1G14650.2	miR173-5p	3009	6	0.155667	0.927718	no	NA	miR173-5p:AT1G14650.2	0.945347
AT1G34418.1	miR5628	200	5.5	0.128197	0.846549	no	NA	miR5628:AT1G34418.1	0.945347
AT1G62330.1	miR156a-5p	1382	4.5	0.132775	0.323243	no	NA	miR156a-5p:AT1G62330.1	0.945347
AT1G68890.1	miR834	1413	5.5	0.123618	0.873109	no	PHYLLO	miR834:PHYLLO	0.945347
AT1G76490.1	miR781a	1146	5.5	0.184664	0.863218	no	AtHMGR1	miR781a:AtHMGR1	0.945347
AT1G78490.1	miR863-5p	1202	5.5	0.209083	0.847099	no	CYP708A3	miR863-5p:CYP708A3	0.945347
AT2G31585.2	miR849	526	5.5	0.0106831	0.863146	no	NA	miR849:AT2G31585.2	0.945347
AT3G14200.1	miR5021	60	4	0.172455	0.441966	no	NA	miR5021:AT3G14200.1	0.945347
AT4G09000.2	miR5641	153	5.5	0.213661	0.858568	no	GF14 CHI	miR5641:GF14 CHI	0.945347
AT5G53130.1	miR5021	70	6	0.167877	0.887503	no	ATCNGC1	miR5021:ATCNGC1	0.945347
AT5G65060.2	miR2112-3p	717	5	0.537205	0.686488	no	AGL70	miR2112-3p:AGL70	0.945347
AT1G74430.1	miR5021	693	6	0.17856	0.885353	no	ATMYB95	miR5021:ATMYB95	0.946204
AT2G28320.1	miR826b	1707	5	0.172455	0.708552	no	NA	miR826b:AT2G28320.1	0.946204
AT2G32510.1	miR869.1	793	6	0.0991998	0.935086	no	MAPKKK17	miR869.1:MAPKKK17	0.946204
AT4G05410.1	miR778	1322	6	0.164824	0.923751	no	YAO	miR778:YAO	0.946204
AT5G53900.2	miR161.2	1147	5	0.151089	0.70938	no	NA	miR161.2:AT5G53900.2	0.946204
AT1G07320.4	miR865-3p	595	5	0.604356	0.703529	no	EMB2784	miR865-3p:EMB2784	0.946433
AT1G73110.1	miR869.1	602	6	0.244184	0.930385	no	NA	miR869.1:AT1G73110.1	0.946433
AT1G79050.2	miR868-3p	1065	5.5	0.0885168	0.848853	no	RECA1	miR868-3p:RECA1	0.946433
AT2G06050.3	miR5646	286	6	0.126671	0.924835	no	AtOPR3	miR5646:AtOPR3	0.946433
AT2G30110.1	miR414	3313	5	0.11904	0.699497	no	ATUBA1	miR414:ATUBA1	0.946433
AT3G51150.2	miR166a-5p	835	5.5	0.448689	0.833223	no	NA	miR166a-5p:AT3G51150.2	0.946433
AT3G53460.4	miR403-5p	1385	5	0.567728	0.612095	no	CP29	miR403-5p:CP29	0.946433
AT4G09965.1	miR164a	184	5	0.109883	0.6951	no	NA	miR164a:AT4G09965.1	0.946433
AT4G14160.3	miR156h	1290	6	0.663876	0.910628	no	NA	miR156h:AT4G14160.3	0.946433
AT4G35580.3	miR8179	625	5.5	0.160246	0.846367	no	CBNAC	miR8179:CBNAC	0.946433
AT5G16290.2	miR826b	1353	5.5	0.293021	0.844504	no	VAT1	miR826b:VAT1	0.946433
AT5G26230.1	miR5636	371	5.5	0.117514	0.844335	no	MAKR1	miR5636:MAKR1	0.946433
AT5G53540.1	miR157d	1200	5	0.109883	0.781777	no	NA	miR157d:AT5G53540.1	0.946433
AT5G57860.4	miR5663-5p	369	5.5	0.0824122	0.846107	no	NA	miR5663-5p:AT5G57860.4	0.946433
AT5G65290.2	miR414	2614	5.5	0.115988	0.846108	no	NA	miR414:AT5G65290.2	0.946433
AT5G11740.1	miR5020b	190	5	0.691347	0.75481	no	AGP15	miR5020b:AGP15	0.946578
AT1G21160.1	miR397b	2512	6	0.135827	0.91403	no	NA	miR397b:AT1G21160.1	0.947226
AT1G59600.1	miR172b-5p	716	5	0.0854645	0.744568	no	ZCW7	miR172b-5p:ZCW7	0.948039
AT1G77840.1	miR5663-5p	425	5	0.155667	0.694563	no	NA	miR5663-5p:AT1G77840.1	0.948039
AT3G07220.1	miR414	584	5.5	0.11904	0.839678	no	AtFHA2	miR414:AtFHA2	0.948039
AT4G14900.1	miR414	429	6	0.0930952	0.914458	no	NA	miR414:AT4G14900.1	0.948039
AT2G44610.1	miR4221	598	6	0.160246	0.9883	no	ATRAB6A	miR4221:ATRAB6A	0.948068
AT3G26070.1	miR5655	130	5.5	0.108357	0.94533	no	NA	miR5655:AT3G26070.1	0.948074
AT1G10522.2	miR3434-3p	685	6	0.289969	0.976885	no	PRIN2	miR3434-3p:PRIN2	0.948771
AT1G68540.2	miR5028	1029	5.5	0.137354	0.933604	no	CCRL6	miR5028:CCRL6	0.948803
AT2G25670.2	miR414	796	5	0.352541	0.684758	no	NA	miR414:AT2G25670.2	0.950412
AT1G75270.1	miR832-3p	731	5	0.114461	0.674126	no	DHAR2	miR832-3p:DHAR2	0.950591
AT1G79920.2	miR397a	732	6	0.0824122	0.922001	no	AtHsp70-15	miR397a:AtHsp70-15	0.950591
AT4G19110.3	miR164c-3p	1176	5	0.134301	0.707013	no	NA	miR164c-3p:AT4G19110.3	0.950591
AT4G19112.1	miR164c-3p	2260	5	0.134301	0.707013	no	CPuORF25	miR164c-3p:CPuORF25	0.950591
AT4G30930.1	miR414	297	5	0.115988	0.681975	no	NFD1	miR414:NFD1	0.950591
AT4G33740.3	miR414	583	6	0.248763	0.912971	no	NA	miR414:AT4G33740.3	0.950591
AT2G41530.1	miR5021	315	5	0.151089	0.776575	no	ATSFGH	miR5021:ATSFGH	0.950797
AT2G42730.2	miR5021	61	6	0.157194	0.874315	no	NA	miR5021:AT2G42730.2	0.950797
AT2G30432.1	miR158a-5p	486	5.5	0.148037	0.840267	no	TCL1	miR158a-5p:TCL1	0.957591
AT5G65630.1	miR828	2151	5	0.813439	0.610218	no	GTE7	miR828:GTE7	0.957591
AT5G07600.1	miR849	437	6	0.108357	0.914384	no	NA	miR849:AT5G07600.1	0.960491
AT1G02680.1	miR5647	328	5	0.169403	0.827259	no	TAF13	miR5647:TAF13	0.962269
AT1G24793.2	miR861-3p	671	5	0.126671	0.808376	no	AtLpxC1	miR861-3p:AtLpxC1	0.962311
AT1G25054.2	miR861-3p	934	5	0.126671	0.808376	no	AtLpxC3	miR861-3p:AtLpxC3	0.962311
AT1G25145.1	miR861-3p	654	5	0.126671	0.808376	no	AtLpxC4	miR861-3p:AtLpxC4	0.962311
AT1G25210.2	miR861-3p	789	5	0.126671	0.808376	no	AtLpxC5	miR861-3p:AtLpxC5	0.962311
AT1G64583.1	miR161.2	747	5	0.32507	0.667241	no	NA	miR161.2:AT1G64583.1	0.963202
AT3G11710.1	miR780.1	1042	5.5	0.300652	0.914186	no	ATKRS-1	miR780.1:ATKRS-1	0.963295
AT3G52960.1	miR2933a	45	6	0.132775	0.963648	no	NA	miR2933a:AT3G52960.1	0.96449
AT4G02760.3	miR5658	1530	5	0.161772	0.674118	no	NA	miR5658:AT4G02760.3	0.964505
AT3G29360.2	miR172d-5p	226	5	0.126671	0.77936	no	UGD2	miR172d-5p:UGD2	0.964789
AT4G27580.1	miR774b-5p	677	5.5	0.141932	0.843335	no	NA	miR774b-5p:AT4G27580.1	0.965598
AT1G02680.1	miR5658	62	5	0.13888	0.809161	no	TAF13	miR5658:TAF13	0.96595
AT1G74560.3	miR414	827	5	0.143458	0.771427	no	NRP1	miR414:NRP1	0.96595
AT4G18120.2	miR870-3p	844	5.5	0.143458	0.916793	no	AML3	miR870-3p:AML3	0.96595
AT5G16540.3	miR5638a	152	5.5	0.323544	0.912654	no	ZFN3	miR5638a:ZFN3	0.96595
AT4G01690.2	miR170-3p	1412	5	0.193821	0.654463	no	HEMG1	miR170-3p:HEMG1	0.966861
AT1G02880.4	miR5021	31	4	0.160246	0.163239	no	TPK1	miR5021:TPK1	0.97069
AT1G15390.1	miR391-3p	620	5.5	0.280812	0.816192	no	ATDEF1	miR391-3p:ATDEF1	0.97069
AT1G20300.1	miR400	1373	5.5	0.123618	0.827013	no	NA	miR400:AT1G20300.1	0.97069
AT1G21560.3	miR5633	432	6	0.132775	0.892931	no	NA	miR5633:AT1G21560.3	0.97069
AT1G21590.1	miR5658	2614	6	0.221292	0.883034	no	NA	miR5658:AT1G21590.1	0.97069
AT1G22640.1	miR858a	394	5	0.309809	0.618222	no	ATMYB3	miR858a:ATMYB3	0.97069
AT1G74710.2	miR828	947	5.5	0.114461	0.819353	no	ATICS1	miR828:ATICS1	0.97069
AT1G75180.3	miR414	1321	5.5	0.146511	0.824416	no	NA	miR414:AT1G75180.3	0.97069
AT1G75860.1	miR5013	737	6	0.137354	0.892247	no	NA	miR5013:AT1G75860.1	0.97069
AT1G77550.1	miR841b-3p	2134	6	0.213661	0.899349	no	NA	miR841b-3p:AT1G77550.1	0.97069
AT1G78040.2	miR415	511	4.5	0.735605	0.270434	no	NA	miR415:AT1G78040.2	0.97069
AT2G20585.3	miR5021	73	5.5	0.131249	0.795118	no	NFD6	miR5021:NFD6	0.97069
AT2G21520.2	miR5998a	2156	5	0.16635	0.522652	no	NA	miR5998a:AT2G21520.2	0.97069
AT2G21600.1	miR159a	913	5	0.109883	0.613064	no	ATRER1B	miR159a:ATRER1B	0.97069
AT2G29560.1	miR838	63	6	0.105304	0.893859	no	ENOC	miR838:ENOC	0.97069
AT2G36145.1	miR396b-5p	563	6	0.242658	0.90447	no	NA	miR396b-5p:AT2G36145.1	0.97069
AT2G42760.1	miR413	403	5.5	0.16635	0.823322	no	NA	miR413:AT2G42760.1	0.97069
AT3G03340.1	miR5632-5p	1100	5	0.175507	0.598366	no	UNE6	miR5632-5p:UNE6	0.97069
AT3G06180.1	miR840-3p	670	6	0.132775	0.897249	no	NA	miR840-3p:AT3G06180.1	0.97069
AT3G17170.1	miR414	768	5	0.18619	0.635395	no	RFC3	miR414:RFC3	0.97069
AT3G24490.1	miR414	937	5.5	0.115988	0.809575	no	NA	miR414:AT3G24490.1	0.97069
AT3G49730.1	miR838	957	6	0.120566	0.887578	no	NA	miR838:AT3G49730.1	0.97069
AT3G55250.1	miR863-3p	609	5	0.244184	0.673619	no	PDE329	miR863-3p:PDE329	0.97069
AT4G10480.2	miR414	216	5	0.24571	0.646661	no	NA	miR414:AT4G10480.2	0.97069
AT4G12420.2	miR414	2007	5	0.109883	0.648026	no	SKU5	miR414:SKU5	0.97069
AT4G15080.1	miR780.1	2604	6	0.213661	0.903436	no	NA	miR780.1:AT4G15080.1	0.97069
AT4G22820.2	miR394a	1026	5	0.131249	0.630178	no	NA	miR394a:AT4G22820.2	0.97069
AT4G32590.4	miR396a-5p	429	5	0.712713	0.625468	no	NA	miR396a-5p:AT4G32590.4	0.97069
AT5G11670.1	miR156j	2112	5	0.154141	0.729793	no	ATNADP-ME2	miR156j:ATNADP-ME2	0.97069
AT5G14910.1	miR5647	548	5	0.15872	0.652695	no	NA	miR5647:AT5G14910.1	0.97069
AT5G23310.1	miR166e-5p	708	5.5	0.129723	0.821358	no	FSD3	miR166e-5p:FSD3	0.97069
AT5G24150.2	miR847	1018	5.5	0.144984	0.806502	no	SQE5	miR847:SQE5	0.97069
AT5G27990.1	miR414	543	6	0.332701	0.900025	no	NA	miR414:AT5G27990.1	0.97069
AT5G45670.1	miR167a-3p	1107	5	0.135827	0.616481	no	NA	miR167a-3p:AT5G45670.1	0.97069
AT5G49550.1	miR830-5p	143	5	0.155667	0.526505	no	BLOS2	miR830-5p:BLOS2	0.97069
AT5G59050.2	miR415	65	6	0.0961475	0.855822	no	NA	miR415:AT5G59050.2	0.97069
AT5G63880.2	miR868-3p	348	6	0.122092	0.897466	no	VPS20.1	miR868-3p:VPS20.1	0.97069
AT5G64630.3	miR161.1	1516	5.5	0.115988	0.819556	no	FAS2	miR161.1:FAS2	0.97069
AT1G12240.1	miR775	1483	5	0.161772	0.683807	no	ATBETAFRUCT4	miR775:ATBETAFRUCT4	0.970909
AT1G27310.1	miR8174	187	5.5	0.129723	0.880987	no	NTF2A	miR8174:NTF2A	0.970909
AT1G29950.2	miR414	1510	5.5	0.239606	0.8836	no	NA	miR414:AT1G29950.2	0.970909
AT1G29951.1	miR414	1495	5.5	0.239606	0.8836	no	CPuORF35	miR414:CPuORF35	0.970909
AT1G29952.1	miR414	1510	5.5	0.239606	0.8836	no	CPuORF34	miR414:CPuORF34	0.970909
AT1G41830.1	miR390b-3p	1502	5	0.11904	0.776541	no	SKS6	miR390b-3p:SKS6	0.970909
AT1G49010.1	miR5658	914	5	0.169403	0.711961	no	NA	miR5658:AT1G49010.1	0.970909
AT1G52700.1	miR169a-3p	234	6	0.140406	0.961402	no	NA	miR169a-3p:AT1G52700.1	0.970909
AT1G59980.1	miR773b-3p	1464	6	0.216713	0.953363	no	ARL2	miR773b-3p:ARL2	0.970909
AT1G62330.1	miR5021	1062	6	0.0915691	0.948293	no	NA	miR5021:AT1G62330.1	0.970909
AT1G71340.1	miR837-5p	1447	5	0.335753	0.601441	no	AtGDPD4	miR837-5p:AtGDPD4	0.970909
AT1G72750.1	miR5996	445	6	0.239606	0.953065	no	ATTIM23-2	miR5996:ATTIM23-2	0.970909
AT1G77440.2	miR867	451	5.5	0.144984	0.895018	no	PBC2	miR867:PBC2	0.970909
AT2G01450.4	miR5021	1686	4	0.288443	0.0812068	no	ATMPK17	miR5021:ATMPK17	0.970909
AT2G04390.1	miR847	328	5	0.267076	0.681508	no	NA	miR847:AT2G04390.1	0.970909
AT2G05220.2	miR847	336	5	0.36475	0.652142	no	NA	miR847:AT2G05220.2	0.970909
AT2G17640.1	miR5637	695	6	0.131249	0.953683	no	ATSERAT3;1	miR5637:ATSERAT3;1	0.970909
AT2G36190.1	miR5998a	1784	5.5	0.318966	0.90379	no	AtCWIN4	miR5998a:AtCWIN4	0.970909
AT2G36850.1	miR838	5971	5	0.439532	0.64243	no	ATGSL08	miR838:ATGSL08	0.970909
AT2G43850.2	miR5014a-3p	1687	5	0.180086	0.697091	no	NA	miR5014a-3p:AT2G43850.2	0.970909
AT3G12610.1	miR172d-5p	646	5.5	0.30523	0.872481	no	DRT100	miR172d-5p:DRT100	0.970909
AT3G14610.1	miR447a-3p	1595	6	0.129723	0.962301	no	CYP72A7	miR447a-3p:CYP72A7	0.970909
AT3G18035.1	miR834	910	5.5	0.126671	0.919079	no	HON4	miR834:HON4	0.970909
AT3G48420.1	miR5021	148	5	0.0030523	0.865655	no	NA	miR5021:AT3G48420.1	0.970909
AT3G52060.2	miR5021	215	4	0.183138	0.291309	no	NA	miR5021:AT3G52060.2	0.970909
AT3G61980.1	miR3434-5p	563	6	0.146511	0.957921	no	NA	miR3434-5p:AT3G61980.1	0.970909
AT4G13250.2	miR156i	1600	5	0.204504	0.85209	no	NYC1	miR156i:NYC1	0.970909
AT4G14270.2	miR831-3p	273	6	0.363224	0.971716	no	NA	miR831-3p:AT4G14270.2	0.970909
AT4G17420.3	miR156i	578	5.5	0.0656245	0.900676	no	NA	miR156i:AT4G17420.3	0.970909
AT4G25730.1	miR5024-3p	2176	5.5	0.13888	0.88392	no	NA	miR5024-3p:AT4G25730.1	0.970909
AT4G27700.1	miR846-3p	296	5.5	0.160246	0.889961	no	NA	miR846-3p:AT4G27700.1	0.970909
AT4G29380.1	miR773a	4476	6	0.183138	0.965141	no	AtVPS15	miR773a:AtVPS15	0.970909
AT4G32910.1	miR773a	1415	6	0.181612	0.966302	no	NA	miR773a:AT4G32910.1	0.970909
AT4G38740.1	miR5632-3p	18	5.5	0.114461	0.90686	no	ROC1	miR5632-3p:ROC1	0.970909
AT5G10400.1	miR414	488	5	0.154141	0.654618	no	NA	miR414:AT5G10400.1	0.970909
AT5G22700.1	miR167a-3p	1438	5	0.196874	0.690207	no	NA	miR167a-3p:AT5G22700.1	0.970909
AT5G42950.1	miR5015	4990	5.5	0.190769	0.897612	no	NA	miR5015:AT5G42950.1	0.970909
AT5G45670.1	miR5014b	979	5.5	0.714239	0.900581	no	NA	miR5014b:AT5G45670.1	0.970909
AT5G49720.1	miR5021	41	5	0.146511	0.88879	no	ATGH9A1	miR5021:ATGH9A1	0.970909
AT5G51950.2	miR5024-3p	972	6	0.144984	0.953	no	NA	miR5024-3p:AT5G51950.2	0.970909
AT5G55180.2	miR172b-5p	1367	5.5	0.465476	0.884004	no	NA	miR172b-5p:AT5G55180.2	0.970909
AT5G57350.2	miR840-3p	2854	5.5	0.109883	0.882316	no	AHA3	miR840-3p:AHA3	0.970909
AT5G57590.1	miR396a-5p	2295	5.5	0.0839383	0.894239	no	BIO1	miR396a-5p:BIO1	0.970909
AT5G58710.1	miR8172	706	5	0.230449	0.671733	no	ROC7	miR8172:ROC7	0.970909
AT5G66540.1	miR847	569	6	0.0488368	0.952859	no	NA	miR847:AT5G66540.1	0.970909
AT1G68010.2	miR5646	1243	5.5	1.15224	0.813643	no	ATHPR1	miR5646:ATHPR1	0.971001
AT3G02290.2	miR413	1340	5	0.151089	0.546457	no	NA	miR413:AT3G02290.2	0.971001
AT5G22650.2	miR414	638	5	1.53378	0.605212	no	ATHD2	miR414:ATHD2	0.971001
AT5G64080.2	miR854a	151	5.5	0.120566	0.836036	no	AtXYP1	miR854a:AtXYP1	0.971001
AT1G08750.3	miR3434-3p	242	6	0.100726	0.885784	no	NA	miR3434-3p:AT1G08750.3	0.971196
AT1G52150.3	miR835-5p	2648	5.5	0.105304	0.797411	no	ATHB-15	miR835-5p:ATHB-15	0.971196
AT1G60420.1	miR865-3p	1652	5.5	0.189243	0.80814	no	NA	miR865-3p:AT1G60420.1	0.971196
AT1G67350.2	miR854a	355	5	0.387642	0.635725	no	NA	miR854a:AT1G67350.2	0.971196
AT2G04350.2	miR845a	2168	5.5	0.199926	0.804552	no	LACS8	miR845a:LACS8	0.971196
AT2G29700.1	miR831-3p	205	6	0.318966	0.887092	no	ATPH1	miR831-3p:ATPH1	0.971196
AT2G37050.3	miR826a	1664	6	0.0824122	0.894106	no	NA	miR826a:AT2G37050.3	0.971196
AT2G44100.2	miR865-3p	596	6	0.1984	0.897172	no	AT-GDI1	miR865-3p:AT-GDI1	0.971196
AT3G07050.1	miR171b-5p	866	6	0.395273	0.891733	no	NSN1	miR171b-5p:NSN1	0.971196
AT3G56800.1	miR837-5p	536	5	0.189243	0.527142	no	ACAM-3	miR837-5p:ACAM-3	0.971196
AT4G01210.1	miR774b-3p	3197	5.5	0.122092	0.806857	no	NA	miR774b-3p:AT4G01210.1	0.971196
AT5G02580.2	miR854a	48	5.5	0.117514	0.828102	no	NA	miR854a:AT5G02580.2	0.971196
AT1G30690.2	miR414	832	6	0.219766	0.88584	no	NA	miR414:AT1G30690.2	0.971756
AT1G45145.1	miR837-5p	390	5	0.129723	0.47658	no	ATH5	miR837-5p:ATH5	0.971756
AT1G68560.1	miR5650	2677	5	0.438005	0.477026	no	ATXYL1	miR5650:ATXYL1	0.971756
AT1G80460.2	miR869.2	1095	6	0.152615	0.89777	no	GLI1	miR869.2:GLI1	0.971756
AT3G19720.3	miR8182	2335	5.5	0.169403	0.769906	no	ARC5	miR8182:ARC5	0.971756
AT3G53420.2	miR5020c	764	5	0.169403	0.573861	no	AtPIP2;1	miR5020c:AtPIP2;1	0.971756
AT3G58990.1	miR5998a	684	6	0.0946214	0.891823	no	IPMI1	miR5998a:IPMI1	0.971756
AT4G30930.1	miR395b	417	5.5	0.112935	0.784771	no	NFD1	miR395b:NFD1	0.971756
AT5G03910.1	miR865-3p	1472	5.5	0.363224	0.799506	no	ABCB29	miR865-3p:ABCB29	0.971756
AT5G41790.1	miR156a-3p	1510	6	0.0183138	0.879985	no	CIP1	miR156a-3p:CIP1	0.971756
AT5G56190.2	miR3434-5p	468	5.5	0.202978	0.804951	no	NA	miR3434-5p:AT5G56190.2	0.971756
AT3G53560.1	miR776	1115	6	0.152615	0.950897	no	NA	miR776:AT3G53560.1	0.972036
AT2G20260.1	miR5631	141	5.5	0.122092	0.780312	no	PSAE-2	miR5631:PSAE-2	0.972249
AT3G61320.1	miR156i	1132	5	0.128197	0.703209	no	NA	miR156i:AT3G61320.1	0.972249
AT4G02590.3	miR1886.1	961	5.5	0.157194	0.809014	no	UNE12	miR1886.1:UNE12	0.972249
AT4G20980.4	miR5651	1477	5.5	0.106831	0.78215	no	NA	miR5651:AT4G20980.4	0.972249
AT5G54160.1	miR5634	591	5.5	0.137354	0.878573	no	ATOMT1	miR5634:ATOMT1	0.973887
AT2G13360.2	miR5021	1381	5.5	0.711187	0.765748	no	AGT	miR5021:AGT	0.975293
AT1G27400.1	miR773a	591	5	0.312861	0.454136	no	NA	miR773a:AT1G27400.1	0.976005
AT2G31960.2	miR860	5964	5	0.131249	0.506229	no	ATGSL03	miR860:ATGSL03	0.976005
AT3G58110.2	miR414	979	5.5	0.0335753	0.783625	no	NA	miR414:AT3G58110.2	0.976005
AT4G36900.1	miR157c-3p	334	6	0.0991998	0.878085	no	DEAR4	miR157c-3p:DEAR4	0.976005
AT1G64150.1	miR835-3p	593	5	0.120566	0.759895	no	NA	miR835-3p:AT1G64150.1	0.976233
AT5G40770.1	miR842	254	6	0.122092	0.947182	no	ATPHB3	miR842:ATPHB3	0.976233
AT3G27810.1	miR858a	499	5	0.253341	0.418736	no	ATMYB21	miR858a:ATMYB21	0.977838
AT3G29075.1	miR842	423	5	0.160246	0.447928	no	NA	miR842:AT3G29075.1	0.977838
AT3G59760.3	miR837-5p	1558	5.5	0.148037	0.793302	no	ATCS-C	miR837-5p:ATCS-C	0.977838
AT5G57050.2	miR781a	92	5	0.132775	0.392048	no	ABI2	miR781a:ABI2	0.977838
AT1G52300.1	miR778	330	6	2.99584	0.883574	no	NA	miR778:AT1G52300.1	0.978518
AT1G63295.1	miR829-5p	403	6	0.125144	0.877416	no	NA	miR829-5p:AT1G63295.1	0.978518
AT1G66580.1	miR158a-5p	795	5	0.140406	0.391587	no	RPL10C	miR158a-5p:RPL10C	0.978518
AT1G68300.1	miR2939	621	6	0.326596	0.874276	no	NA	miR2939:AT1G68300.1	0.978518
AT1G77610.1	miR400	1081	5.5	0.152615	0.788154	no	NA	miR400:AT1G77610.1	0.978518
AT2G17265.1	miR418	424	5.5	0.114461	0.778309	no	DMR1	miR418:DMR1	0.978518
AT3G11120.1	miR831-3p	105	5	1.16751	0.35083	no	NA	miR831-3p:AT3G11120.1	0.978518
AT3G18490.1	miR847	1195	5	0.201452	0.405954	no	ASPG1	miR847:ASPG1	0.978518
AT3G51630.2	miR5021	1724	6	0.108357	0.82787	no	ATWNK5	miR5021:ATWNK5	0.978518
AT3G51632.1	miR5021	1892	6	0.108357	0.82787	no	CPuORF44	miR5021:CPuORF44	0.978518
AT4G38920.1	miR156a-5p	404	5	0.13888	0.64877	no	ATVHA-C3	miR156a-5p:ATVHA-C3	0.978518
AT4G39970.1	miR5636	670	5.5	0.123618	0.774794	no	NA	miR5636:AT4G39970.1	0.978518
AT5G02840.3	miR5656	37	5	0.308283	0.435759	no	LCL1	miR5656:LCL1	0.978518
AT5G14660.2	miR8168	446	5.5	0.105304	0.7511	no	ATDEF2	miR8168:ATDEF2	0.978518
AT5G50960.1	miR838	788	5.5	0.0915691	0.764767	no	ATNBP35	miR838:ATNBP35	0.978518
AT5G64580.1	miR838	1620	6	0.108357	0.866387	no	EMB3144	miR838:EMB3144	0.978518
AT1G19570.2	miR842	467	5	0.276233	0.397976	no	ATDHAR1	miR842:ATDHAR1	0.978658
AT5G08710.1	miR5643a	579	6	0.122092	0.880274	no	RUG1	miR5643a:RUG1	0.978658
AT4G03080.1	miR158a-3p	2586	6	0.0976737	0.863185	no	BSL1	miR158a-3p:BSL1	0.979388
AT5G07530.2	miR164b-3p	1497	5	4.23507	0.379735	no	ATGRP-7	miR164b-3p:ATGRP-7	0.979388
AT2G22370.1	miR408-5p	672	6	0.213661	0.941959	no	NA	miR408-5p:AT2G22370.1	0.980662
AT1G08520.1	miR5595a	1103	5	0.0961475	0.26307	no	ALB-1V	miR5595a:ALB-1V	0.980778
AT1G27710.2	miR170-3p	661	6	0.268603	0.868372	no	NA	miR170-3p:AT1G27710.2	0.980778
AT1G68320.1	miR858a	321	6	0.00152615	0.864338	no	AtMYB62	miR858a:AtMYB62	0.980778
AT1G74560.3	miR414	863	5	0.0854645	0.391385	no	NRP1	miR414:NRP1	0.980778
AT1G79650.4	miR858a	682	6	0.112935	0.862761	no	AtAO1	miR858a:AtAO1	0.980778
AT2G31070.1	miR5021	1600	6	0.306756	0.820751	no	TCP10	miR5021:TCP10	0.980778
AT2G43560.1	miR773a	631	5	3.69939	0.308132	no	NA	miR773a:AT2G43560.1	0.980778
AT3G15530.2	miR5021	41	6	0.129723	0.818633	no	NA	miR5021:AT3G15530.2	0.980778
AT4G19160.3	miR417	862	5	0.352541	0.325915	no	NA	miR417:AT4G19160.3	0.980778
AT5G15948.1	miR851-3p	440	5	0.294547	0.530072	no	CPuORF10	miR851-3p:CPuORF10	0.980778
AT5G15950.2	miR851-3p	519	5	0.294547	0.530072	no	NA	miR851-3p:AT5G15950.2	0.980778
AT5G37780.3	miR414	560	5	0.430375	0.376064	no	ACAM-1	miR414:ACAM-1	0.980778
AT5G66005.3	miR5664	63	5	0.131249	0.183148	no	NA	miR5664:AT5G66005.3	0.980778
AT1G20450.2	miR5632-5p	918	5	2.46473	0.284804	no	ERD10	miR5632-5p:ERD10	0.980795
AT3G47390.2	miR5021	85	5	0.616565	0.662755	no	PHS1	miR5021:PHS1	0.980795
AT5G40170.1	miR5021	2414	6	0.167877	0.817355	no	AtRLP54	miR5021:AtRLP54	0.980795
AT2G31890.1	miR838	317	6	0.128197	0.855365	no	ATRAP	miR838:ATRAP	0.98158
AT1G10740.4	miR5658	1758	5.5	0.152615	0.827897	no	NA	miR5658:AT1G10740.4	0.981595
AT1G15340.2	miR773a	1048	5.5	0.109883	0.851331	no	MBD10	miR773a:MBD10	0.981595
AT1G31300.2	miR5663-5p	1133	5.5	0.120566	0.843722	no	NA	miR5663-5p:AT1G31300.2	0.981595
AT2G23390.1	miR447a.2-3p	794	6	0.23808	0.931133	no	NA	miR447a.2-3p:AT2G23390.1	0.981595
AT2G31390.1	miR865-3p	319	6	0.106831	0.937924	no	NA	miR865-3p:AT2G31390.1	0.981595
AT2G40190.1	miR835-5p	997	5.5	0.199926	0.844294	no	LEW3	miR835-5p:LEW3	0.981595
AT3G02468.1	miR854a	813	5	0.196874	0.657237	no	CPuORF9	miR854a:CPuORF9	0.981595
AT3G02470.4	miR854a	866	5	0.196874	0.657237	no	SAMDC	miR854a:SAMDC	0.981595
AT3G04290.1	miR5661	669	5.5	0.318966	0.85043	no	ATLTL1	miR5661:ATLTL1	0.981595
AT3G54380.3	miR162a-5p	1102	5.5	0.32507	0.805239	no	AtSAC3C	miR162a-5p:AtSAC3C	0.981595
AT3G55420.1	miR854a	385	6	0.129723	0.954853	no	NA	miR854a:AT3G55420.1	0.981595
AT4G21660.2	miR779.1	1804	6	0.781389	0.937362	no	NA	miR779.1:AT4G21660.2	0.981595
AT4G31300.3	miR447c-3p	126	6	0.112935	0.935835	no	PBA1	miR447c-3p:PBA1	0.981595
AT5G10820.1	miR169a-3p	1326	5.5	0.123618	0.842149	no	NA	miR169a-3p:AT5G10820.1	0.981595
AT5G23210.4	miR168b-3p	978	6	0.140406	0.936109	no	SCPL34	miR168b-3p:SCPL34	0.981595
AT5G23730.1	miR396a-5p	836	6	0.155667	0.939224	no	EFO2	miR396a-5p:EFO2	0.981595
AT5G47190.1	miR5020a	60	5.5	0.117514	0.871466	no	NA	miR5020a:AT5G47190.1	0.981595
AT3G63500.2	miR840-3p	3372	6	0.122092	0.858685	no	TTA2	miR840-3p:TTA2	0.983335
AT5G05540.2	miR397b	1717	5	0.347963	0.137722	no	SDN2	miR397b:SDN2	0.985667
AT1G02840.3	miR864-5p	1081	5	0.143458	0.359653	no	At-SR34	miR864-5p:At-SR34	0.985724
AT1G30130.2	miR5021	123	6	0.161772	0.908141	no	NA	miR5021:AT1G30130.2	0.985724
AT1G76170.1	miR414	351	5	0.322018	0.190122	no	NA	miR414:AT1G76170.1	0.985724
AT2G41500.1	miR5645a	1726	6	0.0976737	0.924188	no	EMB2776	miR5645a:EMB2776	0.985724
AT3G20520.1	miR5017-5p	2205	5	0.1984	0.246758	no	GDPDL5	miR5017-5p:GDPDL5	0.985724
AT3G26420.1	miR167a-3p	398	5.5	0.163298	0.818522	no	ATRZ-1A	miR167a-3p:ATRZ-1A	0.985724
AT3G26430.1	miR167a-3p	395	5.5	0.163298	0.818522	no	NA	miR167a-3p:AT3G26430.1	0.985724
AT3G46030.1	miR4243	261	5.5	0.248763	0.831343	no	HTB11	miR4243:HTB11	0.985724
AT4G00420.3	miR5021	44	6	0.352541	0.906881	no	NA	miR5021:AT4G00420.3	0.985724
AT4G25340.2	miR5634	1533	5.5	0.438005	0.840355	no	ATFKBP53	miR5634:ATFKBP53	0.985724
AT4G26230.1	miR414	332	5	0.102252	0.26688	no	NA	miR414:AT4G26230.1	0.985724
AT5G53440.1	miR396b-5p	3164	6	0.120566	0.924456	no	NA	miR396b-5p:AT5G53440.1	0.985724
AT5G64340.1	miR414	1395	5.5	0.111409	0.807147	no	SAC51	miR414:SAC51	0.985724
AT5G64341.1	miR414	1395	5.5	0.111409	0.807147	no	CPuORF40	miR414:CPuORF40	0.985724
AT5G64342.1	miR414	1395	5.5	0.111409	0.807147	no	CPuORF39	miR414:CPuORF39	0.985724
AT5G64343.1	miR414	1395	5.5	0.111409	0.807147	no	CPuORF38	miR414:CPuORF38	0.985724
AT1G64150.1	miR854a	191	6	0.111409	0.866705	no	NA	miR854a:AT1G64150.1	0.98583
AT1G66260.2	miR838	318	6	0.27776	0.852379	no	NA	miR838:AT1G66260.2	0.98583
AT5G28640.1	miR779.1	944	6	0.129723	0.925023	no	AN3	miR779.1:AN3	0.985914
AT3G17185.2	miR390a-5p	619	5	0.122092	0.251516	yes	TAS3a	miR390a-5p:TAS3a	0.986299
AT4G19880.3	miR870-3p	181	6	0.117514	0.931319	no	NA	miR870-3p:AT4G19880.3	0.986299
AT2G26210.3	miR5645a	742	5.5	0.215187	0.751	no	NA	miR5645a:AT2G26210.3	0.987589
AT1G67840.2	miR396b-3p	412	6	0.100726	0.920842	no	CSK	miR396b-3p:CSK	0.987861
AT1G04630.1	miR414	591	5.5	0.314387	0.728482	no	MEE4	miR414:MEE4	0.988761
AT1G11860.3	miR843	518	6	0.274707	0.855568	no	NA	miR843:AT1G11860.3	0.988761
AT1G27510.1	miR1888a	404	5.5	0.318966	0.735374	no	EX2	miR1888a:EX2	0.988761
AT1G30490.1	miR841a-3p	975	5.5	0.180086	0.722493	yes	ATHB9	miR841a-3p:ATHB9	0.988761
AT1G80750.1	miR838	227	5.5	0.120566	0.72824	no	NA	miR838:AT1G80750.1	0.988761
AT2G16720.1	miR858a	330	6	0.00152615	0.851995	no	ATMYB7	miR858a:ATMYB7	0.988761
AT2G33510.2	miR847	509	6	0.00763076	0.845119	no	NA	miR847:AT2G33510.2	0.988761
AT2G39940.1	miR5021	31	5	0.160246	0.639804	no	COI1	miR5021:COI1	0.988761
AT3G19820.3	miR397b	1251	5.5	0.459372	0.721561	no	CBB1	miR397b:CBB1	0.988761
AT3G51520.1	miR829-3p.2	1148	6	0.190769	0.841466	no	DGAT2	miR829-3p.2:DGAT2	0.988761
AT3G53650.1	miR4243	160	5.5	0.0824122	0.747167	no	NA	miR4243:AT3G53650.1	0.988761
AT3G60080.1	miR5641	699	6	0.117514	0.839494	no	NA	miR5641:AT3G60080.1	0.988761
AT4G02530.1	miR870-3p	96	5.5	0.274707	0.735092	no	NA	miR870-3p:AT4G02530.1	0.988761
AT5G14210.1	miR5652	1858	5.5	0.109883	0.756565	no	NA	miR5652:AT5G14210.1	0.988761
AT5G27560.1	miR5640	1190	5.5	0.167877	0.713685	no	NA	miR5640:AT5G27560.1	0.988761
AT5G38650.1	miR866-3p	315	6	0.256393	0.841552	no	NA	miR866-3p:AT5G38650.1	0.988761
AT5G38660.2	miR866-3p	1157	6	0.256393	0.841552	no	APE1	miR866-3p:APE1	0.988761
AT5G39320.1	miR5645a	1515	5.5	0.125144	0.734128	no	UDG4	miR5645a:UDG4	0.988761
AT5G52010.1	miR5634	278	6	0.135827	0.863147	no	NA	miR5634:AT5G52010.1	0.988761
AT5G58960.3	miR159b-5p	568	6	0.183138	0.84611	no	GIL1	miR159b-5p:GIL1	0.988761
AT5G62390.1	miR838	878	6	0.271655	0.848307	no	ATBAG7	miR838:ATBAG7	0.988761
AT5G63640.1	miR5021	67	5.5	0.38459	0.703702	no	NA	miR5021:AT5G63640.1	0.988761
AT5G67380.2	miR5021	60	5	0.140406	0.637447	no	ATCKA1	miR5021:ATCKA1	0.988761
AT1G65370.1	miR8178	1144	5	0.109883	0.186988	no	NA	miR8178:AT1G65370.1	0.98887
AT2G32000.2	miR417	2002	5.5	0.0915691	0.708692	no	NA	miR417:AT2G32000.2	0.989782
AT3G48870.2	miR835-3p	138	6	0.0946214	0.836685	no	ATCLPC	miR835-3p:ATCLPC	0.989782
AT5G45190.2	miR5643a	1315	5.5	0.125144	0.729046	no	NA	miR5643a:AT5G45190.2	0.989782
AT1G49300.2	miR165a-5p	464	5.5	0.131249	0.76319	no	ATRAB7	miR165a-5p:ATRAB7	0.990412
AT4G22220.1	miR5654-3p	444	6	0.48379	0.858688	no	ATISU1	miR5654-3p:ATISU1	0.992038
AT5G17920.2	miR870-5p	816	6	0.247237	0.80339	no	ATCIMS	miR870-5p:ATCIMS	0.992038
AT1G61100.2	miR5021	131	5	0.477685	0.59429	no	NA	miR5021:AT1G61100.2	0.995173
AT3G20390.1	miR5021	47	5	0.373907	0.593732	no	NA	miR5021:AT3G20390.1	0.995173
AT3G22968.1	miR779.2	1207	6	0.143458	0.854088	no	CPuORF59	miR779.2:CPuORF59	0.995173
AT3G22970.2	miR779.2	1205	6	0.143458	0.854088	no	NA	miR779.2:AT3G22970.2	0.995173
AT3G56490.1	miR5663-5p	197	5.5	0.0885168	0.72246	no	HINT1	miR5663-5p:HINT1	0.995173
AT2G19950.2	miR4239	1597	6	0.16635	0.836845	no	GC1	miR4239:GC1	0.99606
AT3G44680.1	miR5021	18	4.5	0.627248	0.123476	no	HDA09	miR5021:HDA09	0.99606
AT3G22440.1	miR2936	1793	6	0.497525	0.832802	no	NA	miR2936:AT3G22440.1	0.996211
AT1G32990.1	miR5021	82	6	0.26555	0.89431	no	PRPL11	miR5021:PRPL11	0.996418
AT4G17270.1	miR5663-5p	1285	6	0.161772	0.913591	no	NA	miR5663-5p:AT4G17270.1	0.996418
AT3G17750.1	miR8167a	3627	6	0.146511	0.9249	no	NA	miR8167a:AT3G17750.1	0.998165
AT2G23290.1	miR414	867	6	0.192295	0.90501	no	AtMYB70	miR414:AtMYB70	0.998392
AT1G01140.3	miR8121	1213	6	0.122092	0.675003	no	CIPK9	miR8121:CIPK9	0.999996
AT1G01800.2	miR171c-5p	925	5.5	0.167877	0.454894	no	NA	miR171c-5p:AT1G01800.2	0.999996
AT1G02110.1	miR396a-3p	1438	6	0.103778	0.738573	no	NA	miR396a-3p:AT1G02110.1	0.999996
AT1G02280.2	miR5650	645	6	0.120566	0.23419	no	ATTOC33	miR5650:ATTOC33	0.999996
AT1G02305.1	miR5014b	956	6	0.100726	0.583415	no	NA	miR5014b:AT1G02305.1	0.999996
AT1G03280.1	miR414	1447	6	0.115988	0.57978	no	NA	miR414:AT1G03280.1	0.999996
AT1G03420.1	miR5028	990	6	0.0763076	0.797567	no	Sadhu4-2	miR5028:Sadhu4-2	0.999996
AT1G04120.2	miR156g	5166	6	0.479212	0.543528	no	ABCC5	miR156g:ABCC5	0.999996
AT1G04340.1	miR172d-5p	483	6	0.0991998	0.611286	no	NA	miR172d-5p:AT1G04340.1	0.999996
AT1G04410.1	miR171c-5p	666	6	0.515839	0.677406	no	c-NAD-MDH1	miR171c-5p:c-NAD-MDH1	0.999996
AT1G04590.2	miR5998a	1209	5.5	0.123618	0.460658	no	NA	miR5998a:AT1G04590.2	0.999996
AT1G06580.1	miR161.2	883	6	0.280812	0.507327	yes	PPR1	miR161.2:PPR1	0.999996
AT1G06720.1	miR414	2026	6	0.192295	0.799436	no	NA	miR414:AT1G06720.1	0.999996
AT1G07110.1	miR5640	2548	6	0.964528	0.552644	no	ATF2KP	miR5640:ATF2KP	0.999996
AT1G07320.4	miR1886.1	100	6	0.114461	0.813874	no	EMB2784	miR1886.1:EMB2784	0.999996
AT1G07440.2	miR773a	70	5.5	0.163298	0.389647	no	NA	miR773a:AT1G07440.2	0.999996
AT1G07920.1	miR861-5p	491	6	0.01984	0.604065	no	NA	miR861-5p:AT1G07920.1	0.999996
AT1G07930.2	miR861-5p	503	6	0.244184	0.583883	no	NA	miR861-5p:AT1G07930.2	0.999996
AT1G07940.2	miR861-5p	622	6	0.0106831	0.705082	no	NA	miR861-5p:AT1G07940.2	0.999996
AT1G07960.3	miR156h	19	6	0.236553	0.115944	no	ATPDIL5-1	miR156h:ATPDIL5-1	0.999996
AT1G08470.1	miR5661	637	6	0.15872	0.663533	no	SSL3	miR5661:SSL3	0.999996
AT1G09340.1	miR850	1381	6	0.676085	0.300786	no	CRB	miR850:CRB	0.999996
AT1G09340.1	miR399d	408	5.5	0.11904	0.580445	no	CRB	miR399d:CRB	0.999996
AT1G10510.1	miR5658	11	6	0.154141	0.358029	no	emb2004	miR5658:emb2004	0.999996
AT1G11130.1	miR419	2413	6	0.184664	0.826456	no	SCM	miR419:SCM	0.999996
AT1G11310.2	miR5021	92	5	0.00457845	0.530309	no	ATMLO2	miR5021:ATMLO2	0.999996
AT1G11700.1	miR164b-3p	318	6	0.184664	0.651078	no	NA	miR164b-3p:AT1G11700.1	0.999996
AT1G12080.2	miR4221	353	5.5	0.453267	0.400398	no	NA	miR4221:AT1G12080.2	0.999996
AT1G12500.1	miR865-3p	1349	6	0.15872	0.620174	no	NA	miR865-3p:AT1G12500.1	0.999996
AT1G13190.1	miR414	1606	6	0.125144	0.802884	no	NA	miR414:AT1G13190.1	0.999996
AT1G13350.2	miR4221	487	5.5	0.26555	0.294764	no	NA	miR4221:AT1G13350.2	0.999996
AT1G14320.2	miR447c-3p	453	6	1.03931	0.296269	no	RPL10	miR447c-3p:RPL10	0.999996
AT1G14810.1	miR157d	22	6	0.137354	0.380373	no	NA	miR157d:AT1G14810.1	0.999996
AT1G15810.1	miR413	1239	6	0.247237	0.543293	no	NA	miR413:AT1G15810.1	0.999996
AT1G16880.2	miR5021	47	5	0.56315	0.170416	no	ACR11	miR5021:ACR11	0.999996
AT1G17100.1	miR854a	131	6	0.210609	0.394994	no	AtHBP1	miR854a:AtHBP1	0.999996
AT1G17720.2	miR5021	2305	5	0.195347	0.398547	no	ATB BETA	miR5021:ATB BETA	0.999996
AT1G17730.1	miR417	319	6	0.125144	0.719793	no	CHMP1B	miR417:CHMP1B	0.999996
AT1G17745.2	miR839-5p	1917	6	0.453267	0.661628	no	PGDH	miR839-5p:PGDH	0.999996
AT1G20260.1	miR859	1238	6	0.367802	0.763251	no	AtVAB3	miR859:AtVAB3	0.999996
AT1G20540.1	miR5663-3p	543	5.5	0.155667	0.242454	no	NA	miR5663-3p:AT1G20540.1	0.999996
AT1G20693.3	miR414	583	5.5	0.578411	0.307696	no	HMG BETA 1	miR414:HMG BETA 1	0.999996
AT1G20693.3	miR390a-3p	589	5.5	0.228923	0.239567	no	HMG BETA 1	miR390a-3p:HMG BETA 1	0.999996
AT1G20810.1	miR390a-5p	609	6	0.946214	0.139109	no	NA	miR390a-5p:AT1G20810.1	0.999996
AT1G21600.2	miR5638b	688	6	0.190769	0.216359	no	PTAC6	miR5638b:PTAC6	0.999996
AT1G22380.1	miR157a-3p	1302	6	0.0534153	0.677876	no	AtUGT85A3	miR157a-3p:AtUGT85A3	0.999996
AT1G22400.1	miR157a-3p	1371	6	0.202978	0.430207	no	ATUGT85A1	miR157a-3p:ATUGT85A1	0.999996
AT1G23280.1	miR5645a	856	6	0.160246	0.717046	no	NA	miR5645a:AT1G23280.1	0.999996
AT1G24260.3	miR398a-5p	743	6	0.164824	0.569905	no	AGL9	miR398a-5p:AGL9	0.999996
AT1G27370.4	miR4245	1614	6	6.55329	0.692372	no	SPL10	miR4245:SPL10	0.999996
AT1G28960.5	miR5025	1084	6	0.0991998	0.674863	no	ATNUDT15	miR5025:ATNUDT15	0.999996
AT1G29320.1	miR396b-3p	1053	6	0.131249	0.479383	no	NA	miR396b-3p:AT1G29320.1	0.999996
AT1G29880.1	miR835-5p	1997	6	0.181612	0.792273	no	NA	miR835-5p:AT1G29880.1	0.999996
AT1G29950.2	miR5014b	1047	6	0.141932	0.819325	no	NA	miR5014b:AT1G29950.2	0.999996
AT1G29951.1	miR5014b	1032	6	0.141932	0.819325	no	CPuORF35	miR5014b:CPuORF35	0.999996
AT1G29952.1	miR5014b	1047	6	0.141932	0.819325	no	CPuORF34	miR5014b:CPuORF34	0.999996
AT1G30230.2	miR5665	662	6	1.41322	0.499881	no	eEF-1Bb1	miR5665:eEF-1Bb1	0.999996
AT1G30520.1	miR781a	1195	6	0.222818	0.818227	no	AAE14	miR781a:AAE14	0.999996
AT1G30530.1	miR773a	584	6	0.201452	0.754611	no	UGT78D1	miR773a:UGT78D1	0.999996
AT1G30590.1	miR5021	30	6	0.187717	0.597618	no	NA	miR5021:AT1G30590.1	0.999996
AT1G30820.1	miR166a-5p	1990	6	0.144984	0.639461	no	NA	miR166a-5p:AT1G30820.1	0.999996
AT1G31910.2	miR413	1839	6	0.164824	0.389958	no	NA	miR413:AT1G31910.2	0.999996
AT1G32070.3	miR5021	52	5	0.636405	0.292543	no	ATNSI	miR5021:ATNSI	0.999996
AT1G33680.1	miR5661	2446	6	0.103778	0.211398	no	NA	miR5661:AT1G33680.1	0.999996
AT1G35680.1	miR159a	28	5.5	0.453267	0.332343	no	RPL21C	miR159a:RPL21C	0.999996
AT1G36160.2	miR5998a	5888	6	0.132775	0.705391	no	ACC1	miR5998a:ACC1	0.999996
AT1G44900.2	miR780.2	2954	5.5	0.154141	0.591627	no	ATMCM2	miR780.2:ATMCM2	0.999996
AT1G48920.1	miR414	1280	5.5	0.418165	0.636362	no	ATNUC-L1	miR414:ATNUC-L1	0.999996
AT1G51070.2	miR840-3p	715	6	0.160246	0.580674	no	bHLH115	miR840-3p:bHLH115	0.999996
AT1G52030.2	miR4239	1548	6	0.201452	0.457635	no	F-ATMBP	miR4239:F-ATMBP	0.999996
AT1G52600.1	miR868-5p	592	5.5	0.0778337	0.50618	no	NA	miR868-5p:AT1G52600.1	0.999996
AT1G52670.1	miR5658	22	5.5	0.128197	0.293905	no	NA	miR5658:AT1G52670.1	0.999996
AT1G53290.1	miR156g	966	5	0.173981	0.413739	no	NA	miR156g:AT1G53290.1	0.999996
AT1G53310.3	miR5640	3152	6	0.122092	0.593779	no	ATPEPC1	miR5640:ATPEPC1	0.999996
AT1G53645.1	miR837-5p	1450	6	0.102252	0.778075	no	NA	miR837-5p:AT1G53645.1	0.999996
AT1G55670.1	miR157d	654	5.5	1.05304	0.386203	no	PSAG	miR157d:PSAG	0.999996
AT1G60870.1	miR5021	212	5	0.141932	0.148778	no	MEE9	miR5021:MEE9	0.999996
AT1G60940.2	miR858a	1020	6	0.148037	0.603609	no	SNRK2-10	miR858a:SNRK2-10	0.999996
AT1G60950.1	miR773b-3p	423	5.5	3.5071	0.494993	no	ATFD2	miR773b-3p:ATFD2	0.999996
AT1G62480.1	miR838	473	5.5	0.273181	0.364101	no	NA	miR838:AT1G62480.1	0.999996
AT1G62640.2	miR5013	667	6	0.100726	0.828783	no	KAS III	miR5013:KAS III	0.999996
AT1G64520.1	miR156i	907	6	0.213661	0.636071	no	RPN12a	miR156i:RPN12a	0.999996
AT1G64770.3	miR2111a-5p	848	6	0.114461	0.707433	no	NDF2	miR2111a-5p:NDF2	0.999996
AT1G65060.2	miR859	1368	5.5	0.143458	0.698762	no	4CL3	miR859:4CL3	0.999996
AT1G65220.1	miR847	1319	6	0.395273	0.259489	no	NA	miR847:AT1G65220.1	0.999996
AT1G65230.1	miR5640	883	5.5	0.691347	0.172241	no	NA	miR5640:AT1G65230.1	0.999996
AT1G65840.1	miR5021	1998	5.5	0.651667	0.222581	no	ATPAO4	miR5021:ATPAO4	0.999996
AT1G66260.2	miR394a	983	5.5	0.248763	0.622598	no	NA	miR394a:AT1G66260.2	0.999996
AT1G68890.1	miR160a-5p	4656	5.5	0.0961475	0.554096	no	PHYLLO	miR160a-5p:PHYLLO	0.999996
AT1G72040.1	miR834	1722	6	0.123618	0.848946	no	AtdNK	miR834:AtdNK	0.999996
AT1G72510.2	miR5021	209	6	0.323544	0.430341	no	NA	miR5021:AT1G72510.2	0.999996
AT1G74060.1	miR835-3p	810	5.5	0.11904	0.376941	no	NA	miR835-3p:AT1G74060.1	0.999996
AT1G75500.2	miR164a	1284	6	0.148037	0.628838	no	UMAMIT5	miR164a:UMAMIT5	0.999996
AT1G76030.1	miR865-3p	1462	5.5	0.155667	0.629858	no	AtVAB1	miR865-3p:AtVAB1	0.999996
AT1G77090.1	miR157a-3p	321	6	0.167877	0.339619	no	NA	miR157a-3p:AT1G77090.1	0.999996
AT1G77260.1	miR159b-5p	1929	6	0.134301	0.374951	no	NA	miR159b-5p:AT1G77260.1	0.999996
AT1G78040.2	miR5641	20	5	0.180086	0.107183	no	NA	miR5641:AT1G78040.2	0.999996
AT1G78080.1	miR5021	653	6	0.115988	0.67505	no	RAP2.4	miR5021:RAP2.4	0.999996
AT1G80380.4	miR5661	829	5.5	0.0885168	0.656615	no	NA	miR5661:AT1G80380.4	0.999996
AT1G80930.1	miR5641	2854	6	0.129723	0.5434	no	NA	miR5641:AT1G80930.1	0.999996
AT2G01320.4	miR866-5p	2270	6	0.518891	0.747045	no	ABCG7	miR866-5p:ABCG7	0.999996
AT2G01490.1	miR5655	1039	6	0.169403	0.633132	no	PAHX	miR5655:PAHX	0.999996
AT2G01970.1	miR5021	39	5.5	0.201452	0.498809	no	NA	miR5021:AT2G01970.1	0.999996
AT2G02160.1	miR838	1952	6	0.13888	0.738677	no	NA	miR838:AT2G02160.1	0.999996
AT2G02470.2	miR413	1001	6	0.248763	0.733033	no	AL6	miR413:AL6	0.999996
AT2G03150.1	miR157d	4243	5.5	1.3598	0.0940808	no	emb1579	miR157d:emb1579	0.999996
AT2G04030.2	miR831-5p	1986	6	0.311335	0.624338	no	AtHsp90.5	miR831-5p:AtHsp90.5	0.999996
AT2G10940.2	miR862-5p	726	6	0.456319	0.55698	no	NA	miR862-5p:AT2G10940.2	0.999996
AT2G11910.2	miR414	286	6	0.471581	0.615248	no	NA	miR414:AT2G11910.2	0.999996
AT2G11910.2	miR837-5p	371	5.5	0.241132	0.654657	no	NA	miR837-5p:AT2G11910.2	0.999996
AT2G13975.2	miR5021	13	6	0.0259446	0.201075	no	NA	miR5021:AT2G13975.2	0.999996
AT2G16600.2	miR414	538	5.5	2.36859	0.405204	no	ROC3	miR414:ROC3	0.999996
AT2G16640.1	miR4243	3245	6	0.163298	0.793802	no	ATTOC132	miR4243:ATTOC132	0.999996
AT2G16940.3	miR847	334	6	0.114461	0.812968	no	NA	miR847:AT2G16940.3	0.999996
AT2G17350.1	miR865-3p	261	6	0.169403	0.758474	no	NA	miR865-3p:AT2G17350.1	0.999996
AT2G17390.1	miR5014a-5p	691	6	0.0427322	0.663186	no	AKR2B	miR5014a-5p:AKR2B	0.999996
AT2G17420.1	miR414	817	6	0.25792	0.760202	no	ATNTRA	miR414:ATNTRA	0.999996
AT2G18160.1	miR5633	829	5.5	1.13088	0.0508682	no	ATBZIP2	miR5633:ATBZIP2	0.999996
AT2G18162.1	miR5633	829	5.5	1.13088	0.0508682	no	CPuORF1	miR5633:CPuORF1	0.999996
AT2G19480.3	miR5012	1319	5.5	0.132775	0.523722	no	NAP1;2	miR5012:NAP1;2	0.999996
AT2G19730.3	miR8168	455	6	0.445636	0.523269	no	NA	miR8168:AT2G19730.3	0.999996
AT2G20140.1	miR172b-5p	552	6	0.0351015	0.809124	no	RPT2b	miR172b-5p:RPT2b	0.999996
AT2G21370.2	miR869.2	475	6	0.499051	0.29336	no	XK-1	miR869.2:XK-1	0.999996
AT2G21790.1	miR838	2624	6	0.154141	0.789197	no	ATRNR1	miR838:ATRNR1	0.999996
AT2G22795.1	miR4221	656	6	0.270129	0.585162	no	NA	miR4221:AT2G22795.1	0.999996
AT2G22795.1	miR4221	722	6	0.334227	0.51449	no	NA	miR4221:AT2G22795.1	0.999996
AT2G22840.1	miR834	1660	6	0.526522	0.554998	no	AtGRF1	miR834:AtGRF1	0.999996
AT2G23350.1	miR854a	2192	5.5	0.189243	0.348929	no	PAB4	miR854a:PAB4	0.999996
AT2G23940.1	miR396b-5p	664	5.5	0.0976737	0.690091	no	NA	miR396b-5p:AT2G23940.1	0.999996
AT2G24360.1	miR5021	56	6	0.0488368	0.426795	no	NA	miR5021:AT2G24360.1	0.999996
AT2G24690.1	miR3434-5p	1249	6	0.134301	0.778067	no	NA	miR3434-5p:AT2G24690.1	0.999996
AT2G24990.1	miR5021	14	6	0.123618	0.329527	no	NA	miR5021:AT2G24990.1	0.999996
AT2G25350.1	miR837-5p	1624	6	0.25792	0.442132	no	NA	miR837-5p:AT2G25350.1	0.999996
AT2G26060.2	miR781a	1250	5.5	0.114461	0.48225	no	emb1345	miR781a:emb1345	0.999996
AT2G28350.1	miR8168	2064	6	0.518891	0.705726	no	ARF10	miR8168:ARF10	0.999996
AT2G28370.1	miR5021	934	6	0.134301	0.688671	no	NA	miR5021:AT2G28370.1	0.999996
AT2G28910.1	miR414	876	5.5	0.199926	0.508157	no	CXIP4	miR414:CXIP4	0.999996
AT2G30105.1	miR5643a	824	6	0.111409	0.459389	no	NA	miR5643a:AT2G30105.1	0.999996
AT2G31750.1	miR5645a	870	5.5	0.161772	0.484177	no	UGT74D1	miR5645a:UGT74D1	0.999996
AT2G32060.3	miR5666	435	5.5	0.784442	0.562341	no	NA	miR5666:AT2G32060.3	0.999996
AT2G32760.2	miR5998a	923	6	0.131249	0.32099	no	NA	miR5998a:AT2G32760.2	0.999996
AT2G32950.1	miR837-5p	540	6	0.154141	0.51931	no	ATCOP1	miR837-5p:ATCOP1	0.999996
AT2G35490.1	miR399c-5p	1185	6	0.15872	0.69576	no	NA	miR399c-5p:AT2G35490.1	0.999996
AT2G35500.1	miR5017-3p	55	6	0.416639	0.267409	no	SKL2	miR5017-3p:SKL2	0.999996
AT2G35680.1	miR414	1517	5.5	0.369329	0.158825	no	NA	miR414:AT2G35680.1	0.999996
AT2G36530.1	miR414	723	5.5	0.289969	0.594302	no	ENO2	miR414:ENO2	0.999996
AT2G36880.2	miR5021	1600	5.5	0.125144	0.385136	no	MAT3	miR5021:MAT3	0.999996
AT2G37050.3	miR169g-3p	2744	6	0.148037	0.553837	no	NA	miR169g-3p:AT2G37050.3	0.999996
AT2G37110.1	miR5014a-5p	463	6	0.134301	0.684233	no	NA	miR5014a-5p:AT2G37110.1	0.999996
AT2G37170.1	miR5638b	797	6	0.0183138	0.592977	no	PIP2;2	miR5638b:PIP2;2	0.999996
AT2G37180.1	miR5638b	802	6	0.160246	0.762345	no	PIP2;3	miR5638b:PIP2;3	0.999996
AT2G37340.3	miR5655	1252	6	0.44411	0.416619	no	AT-RS2Z33	miR5655:AT-RS2Z33	0.999996
AT2G37478.1	miR5021	26	5	0.140406	0.469303	no	CPuORF52	miR5021:CPuORF52	0.999996
AT2G37480.2	miR5021	26	5	0.140406	0.469303	no	NA	miR5021:AT2G37480.2	0.999996
AT2G37920.1	miR5021	741	6	0.134301	0.69059	no	emb1513	miR5021:emb1513	0.999996
AT2G38170.3	miR5636	1179	6	0.135827	0.718212	no	ATCAX1	miR5636:ATCAX1	0.999996
AT2G38185.4	miR837-5p	1407	5.5	0.131249	0.245751	no	APD1	miR837-5p:APD1	0.999996
AT2G38195.2	miR837-5p	254	5.5	0.131249	0.245751	no	APD4	miR837-5p:APD4	0.999996
AT2G39730.3	miR5640	123	6	0.172455	0.0939603	no	RCA	miR5640:RCA	0.999996
AT2G39730.3	miR863-5p	420	6	0.74934	0.458086	no	RCA	miR863-5p:RCA	0.999996
AT2G39800.4	miR397a	858	5.5	0.262498	0.397094	no	ATP5CS	miR397a:ATP5CS	0.999996
AT2G41430.5	miR3434-5p	702	5.5	0.373907	0.497856	no	CID1	miR3434-5p:CID1	0.999996
AT2G43010.2	miR5021	45	5	0.134301	0.518936	no	AtPIF4	miR5021:AtPIF4	0.999996
AT2G43235.1	miR5021	44	5	0.157194	0.259918	no	NA	miR5021:AT2G43235.1	0.999996
AT2G43710.2	miR5632-5p	1274	6	0.453267	0.811633	no	FAB2	miR5632-5p:FAB2	0.999996
AT2G44060.2	miR414	1037	5.5	1.47884	0.505641	no	NA	miR414:AT2G44060.2	0.999996
AT2G45245.4	miR846-5p	939	5.5	0.253341	0.719604	no	NA	miR846-5p:AT2G45245.4	0.999996
AT2G45260.1	miR846-5p	1466	5.5	0.253341	0.719604	no	NA	miR846-5p:AT2G45260.1	0.999996
AT2G46250.1	miR836	172	6	0.0824122	0.305676	no	NA	miR836:AT2G46250.1	0.999996
AT2G46670.1	miR5021	662	5.5	0.392221	0.482096	no	NA	miR5021:AT2G46670.1	0.999996
AT2G46790.2	miR5021	1750	5.5	0.175507	0.462818	no	APRR9	miR5021:APRR9	0.999996
AT2G46790.2	miR5021	43	5	0.279286	0.460765	no	APRR9	miR5021:APRR9	0.999996
AT2G47110.2	miR5024-3p	149	6	0.267076	0.533149	no	UBI6	miR5024-3p:UBI6	0.999996
AT2G47850.3	miR846-5p	1757	6	0.144984	0.759168	no	NA	miR846-5p:AT2G47850.3	0.999996
AT3G01390.2	miR837-5p	470	5.5	0.129723	0.416044	no	AVMA10	miR837-5p:AVMA10	0.999996
AT3G01690.1	miR390b-3p	850	5.5	0.341858	0.675695	no	NA	miR390b-3p:AT3G01690.1	0.999996
AT3G05220.2	miR847	1234	6	0.120566	0.781739	no	NA	miR847:AT3G05220.2	0.999996
AT3G05220.2	miR414	460	5.5	0.105304	0.690252	no	NA	miR414:AT3G05220.2	0.999996
AT3G05590.1	miR773a	398	6	0.2976	0.366446	no	RPL18	miR773a:RPL18	0.999996
AT3G05760.2	miR774b-5p	731	5.5	0.177034	0.663011	no	NA	miR774b-5p:AT3G05760.2	0.999996
AT3G06010.1	miR403-3p	66	6	0.286916	0.460224	no	ATCHR12	miR403-3p:ATCHR12	0.999996
AT3G07700.3	miR160a-3p	2070	6	0.129723	0.77009	no	NA	miR160a-3p:AT3G07700.3	0.999996
AT3G08520.1	miR831-3p	29	6	3.76959	0.825856	no	NA	miR831-3p:AT3G08520.1	0.999996
AT3G08730.1	miR854a	60	6	1.23923	0.0395288	no	ATPK1	miR854a:ATPK1	0.999996
AT3G09410.3	miR5024-3p	1737	6	0.111409	0.686864	no	NA	miR5024-3p:AT3G09410.3	0.999996
AT3G10060.1	miR390a-5p	697	6	9.31715	0.676956	no	NA	miR390a-5p:AT3G10060.1	0.999996
AT3G11210.1	miR843	648	6	0.260972	0.363465	no	NA	miR843:AT3G11210.1	0.999996
AT3G12320.1	miR5021	25	6	0.0869906	0.228558	no	NA	miR5021:AT3G12320.1	0.999996
AT3G12610.1	miR3932a	1000	6	0.114461	0.634308	no	DRT100	miR3932a:DRT100	0.999996
AT3G13470.1	miR5012	1294	6	0.251815	0.764979	no	Cpn60beta2	miR5012:Cpn60beta2	0.999996
AT3G13750.1	miR5014a-5p	2675	6	0.11904	0.553706	no	BGAL1	miR5014a-5p:BGAL1	0.999996
AT3G13860.1	miR162a-3p	1132	6	0.0824122	0.825428	no	HSP60-3A	miR162a-3p:HSP60-3A	0.999996
AT3G13960.1	miR774b-5p	1068	5.5	0.438005	0.343353	no	AtGRF5	miR774b-5p:AtGRF5	0.999996
AT3G15354.1	miR5021	2892	5	0.143458	0.489303	no	SPA3	miR5021:SPA3	0.999996
AT3G16190.1	miR869.2	549	6	0.202978	0.678208	no	NA	miR869.2:AT3G16190.1	0.999996
AT3G16200.1	miR835-5p	515	6	0.148037	0.506477	no	NA	miR835-5p:AT3G16200.1	0.999996
AT3G16850.1	miR395a	815	6	0.271655	0.336903	no	NA	miR395a:AT3G16850.1	0.999996
AT3G17160.1	miR847	291	6	0.0747814	0.606456	no	NA	miR847:AT3G17160.1	0.999996
AT3G18680.1	miR5638a	1094	6	0.137354	0.552752	no	NA	miR5638a:AT3G18680.1	0.999996
AT3G19220.1	miR5638a	296	6	0.109883	0.791994	no	CYO1	miR5638a:CYO1	0.999996
AT3G19420.1	miR2939	2166	5.5	0.140406	0.64404	no	ATPEN2	miR2939:ATPEN2	0.999996
AT3G21465.2	miR773b-3p	764	6	0.152615	0.629766	no	NA	miR773b-3p:AT3G21465.2	0.999996
AT3G23390.1	miR832-3p	416	6	0.131249	0.37641	no	NA	miR832-3p:AT3G23390.1	0.999996
AT3G23480.2	miR826b	1537	6	0.322018	0.430486	no	NA	miR826b:AT3G23480.2	0.999996
AT3G23590.1	miR172b-5p	3945	6	0.367802	0.772461	no	MED33A	miR172b-5p:MED33A	0.999996
AT3G26430.1	miR859	2214	6	0.050363	0.824003	no	NA	miR859:AT3G26430.1	0.999996
AT3G27160.1	miR1886.1	90	6	0.534153	0.689352	no	GHS1	miR1886.1:GHS1	0.999996
AT3G27810.1	miR5654-3p	481	6	0.358646	0.0677389	no	ATMYB21	miR5654-3p:ATMYB21	0.999996
AT3G28500.1	miR2936	237	6	0.598251	0.490457	no	NA	miR2936:AT3G28500.1	0.999996
AT3G29075.1	miR414	489	5.5	0.239606	0.529755	no	NA	miR414:AT3G29075.1	0.999996
AT3G29075.1	miR164b-3p	496	6	0.442584	0.616499	no	NA	miR164b-3p:AT3G29075.1	0.999996
AT3G29185.2	miR862-3p	1006	6	0.103778	0.38445	no	NA	miR862-3p:AT3G29185.2	0.999996
AT3G43610.1	miR780.2	3196	6	0.128197	0.467507	no	NA	miR780.2:AT3G43610.1	0.999996
AT3G45780.2	miR5012	2727	6	0.169403	0.823702	no	JK224	miR5012:JK224	0.999996
AT3G48930.1	miR5020c	437	6	0.889746	0.377025	no	EMB1080	miR5020c:EMB1080	0.999996
AT3G49910.1	miR172b-5p	606	5.5	1.28197	0.161382	no	NA	miR172b-5p:AT3G49910.1	0.999996
AT3G50240.1	miR414	3210	6	0.152615	0.512292	no	KICP-02	miR414:KICP-02	0.999996
AT3G50820.1	miR782	1083	6	0.288443	0.559383	no	OEC33	miR782:OEC33	0.999996
AT3G51950.2	miR5021	472	6	0.160246	0.730131	no	NA	miR5021:AT3G51950.2	0.999996
AT3G52300.2	miR5021	56	6	0.531101	0.545169	no	ATPQ	miR5021:ATPQ	0.999996
AT3G52560.4	miR414	784	6	0.341858	0.764398	no	MMZ4	miR414:MMZ4	0.999996
AT3G52570.1	miR2938	694	5.5	0.187717	0.514288	no	NA	miR2938:AT3G52570.1	0.999996
AT3G53420.2	miR5638b	946	6	0.128197	0.392955	no	AtPIP2;1	miR5638b:AtPIP2;1	0.999996
AT3G53580.1	miR397a	1110	6	0.125144	0.780776	no	NA	miR397a:AT3G53580.1	0.999996
AT3G53890.2	miR5021	39	6	0.108357	0.0690591	no	NA	miR5021:AT3G53890.2	0.999996
AT3G54050.2	miR169a-3p	783	6	0.227397	0.375071	no	HCEF1	miR169a-3p:HCEF1	0.999996
AT3G55020.1	miR863-5p	2846	5.5	0.792073	0.567474	no	NA	miR863-5p:AT3G55020.1	0.999996
AT3G57520.3	miR396b-5p	474	6	0.103778	0.776642	no	AtSIP2	miR396b-5p:AtSIP2	0.999996
AT3G57550.2	miR5998a	1230	6	0.296073	0.825917	no	AGK2	miR5998a:AGK2	0.999996
AT3G58490.2	miR173-5p	46	6	0.219766	0.685315	no	AtSPP1	miR173-5p:AtSPP1	0.999996
AT3G58660.1	miR414	1016	5.5	0.120566	0.549895	no	NA	miR414:AT3G58660.1	0.999996
AT3G58730.1	miR168b-3p	814	6	0.123618	0.655462	no	NA	miR168b-3p:AT3G58730.1	0.999996
AT3G59660.1	miR5021	2042	5.5	0.351015	0.435599	no	NA	miR5021:AT3G59660.1	0.999996
AT3G59780.1	miR866-3p	2261	5.5	0.141932	0.540153	no	NA	miR866-3p:AT3G59780.1	0.999996
AT3G60210.1	miR397b	626	6	0.164824	0.755504	no	NA	miR397b:AT3G60210.1	0.999996
AT3G61490.3	miR157a-3p	1262	6	0.108357	0.640854	no	NA	miR157a-3p:AT3G61490.3	0.999996
AT3G62250.1	miR838	281	6	0.183138	0.435716	no	UBQ5	miR838:UBQ5	0.999996
AT4G01050.1	miR397b	911	6	0.271655	0.502485	no	TROL	miR397b:TROL	0.999996
AT4G01150.2	miR3440b-3p	252	5.5	0.193821	0.451839	no	NA	miR3440b-3p:AT4G01150.2	0.999996
AT4G01370.1	miR415	1315	5.5	0.160246	0.641965	no	ATMPK4	miR415:ATMPK4	0.999996
AT4G02940.1	miR5021	1812	6	0.0885168	0.602278	no	NA	miR5021:AT4G02940.1	0.999996
AT4G02940.1	miR8172	1827	6	0.123618	0.621699	no	NA	miR8172:AT4G02940.1	0.999996
AT4G04210.1	miR399c-5p	542	5.5	0.167877	0.220135	no	PUX4	miR399c-5p:PUX4	0.999996
AT4G05180.1	miR8171	365	5.5	0.170929	0.488926	no	PSBQ	miR8171:PSBQ	0.999996
AT4G06634.3	miR414	1250	6	0.144984	0.828775	no	AtYY1	miR414:AtYY1	0.999996
AT4G09350.1	miR5628	697	6	0.135827	0.684523	no	CRRJ	miR5628:CRRJ	0.999996
AT4G10090.1	miR5021	63	6	0.271655	0.389322	no	ELP6	miR5021:ELP6	0.999996
AT4G10430.3	miR865-3p	854	6	0.0351015	0.701213	no	NA	miR865-3p:AT4G10430.3	0.999996
AT4G10450.1	miR5630a	310	5.5	0.117514	0.66979	no	NA	miR5630a:AT4G10450.1	0.999996
AT4G11160.1	miR413	991	6	0.18619	0.728272	no	NA	miR413:AT4G11160.1	0.999996
AT4G12680.1	miR5998a	949	5.5	0.193821	0.260206	no	NA	miR5998a:AT4G12680.1	0.999996
AT4G13590.2	miR158a-5p	707	5.5	0.181612	0.347624	no	NA	miR158a-5p:AT4G13590.2	0.999996
AT4G13710.2	miR5641	18	5.5	0.0213661	0.636016	no	NA	miR5641:AT4G13710.2	0.999996
AT4G14240.2	miR159b-3p	1398	5.5	0.291495	0.329246	no	NA	miR159b-3p:AT4G14240.2	0.999996
AT4G15790.1	miR854a	256	6	0.129723	0.750569	no	NA	miR854a:AT4G15790.1	0.999996
AT4G15790.1	miR172d-5p	457	6	0.103778	0.645613	no	NA	miR172d-5p:AT4G15790.1	0.999996
AT4G16530.1	miR414	2242	6	0.0351015	0.685618	no	NA	miR414:AT4G16530.1	0.999996
AT4G16720.1	miR5644	520	5.5	0.123618	0.364613	no	NA	miR5644:AT4G16720.1	0.999996
AT4G16830.3	miR842	739	6	0.146511	0.808447	no	NA	miR842:AT4G16830.3	0.999996
AT4G16840.1	miR5021	233	6	0.144984	0.320583	no	NA	miR5021:AT4G16840.1	0.999996
AT4G17620.3	miR5641	203	6	0.0152615	0.796467	no	NA	miR5641:AT4G17620.3	0.999996
AT4G18370.1	miR832-3p	768	6	0.209083	0.347438	no	DEG5	miR832-3p:DEG5	0.999996
AT4G18501.1	miR854a	68	6	0.242658	0.464422	no	NA	miR854a:AT4G18501.1	0.999996
AT4G18580.2	miR858a	321	6	0.112935	0.694356	no	NA	miR858a:AT4G18580.2	0.999996
AT4G18970.2	miR862-5p	1262	6	0.148037	0.546591	no	NA	miR862-5p:AT4G18970.2	0.999996
AT4G19610.1	miR156i	79	6	0.115988	0.504917	no	NA	miR156i:AT4G19610.1	0.999996
AT4G20320.2	miR172d-5p	924	5.5	0.152615	0.52185	no	NA	miR172d-5p:AT4G20320.2	0.999996
AT4G21520.1	miR414	1192	5.5	0.259446	0.553022	no	NA	miR414:AT4G21520.1	0.999996
AT4G21540.3	miR398a-3p	1145	6	0.473107	0.528541	no	SPHK1	miR398a-3p:SPHK1	0.999996
AT4G22190.1	miR845a	1059	6	0.0976737	0.720509	no	NA	miR845a:AT4G22190.1	0.999996
AT4G23250.1	miR5021	41	5	0.134301	0.472427	no	CRK17	miR5021:CRK17	0.999996
AT4G23470.3	miR4245	1039	6	0.497525	0.796953	no	NA	miR4245:AT4G23470.3	0.999996
AT4G23890.1	miR5662	83	5.5	0.132775	0.323948	no	CRR31	miR5662:CRR31	0.999996
AT4G24690.1	miR159b-5p	2026	5.5	0.106831	0.566932	no	AtNBR1	miR159b-5p:AtNBR1	0.999996
AT4G24770.1	miR854a	1111	5.5	0.434953	0.497682	no	ATRBP31	miR854a:ATRBP31	0.999996
AT4G24770.1	miR156a-3p	492	6	0.132775	0.620997	no	ATRBP31	miR156a-3p:ATRBP31	0.999996
AT4G26230.1	miR398a-3p	115	5.5	0.70966	0.550963	no	NA	miR398a-3p:AT4G26230.1	0.999996
AT4G26555.1	miR773a	537	6	0.502104	0.0610487	no	NA	miR773a:AT4G26555.1	0.999996
AT4G27830.1	miR773b-3p	476	6	0.114461	0.661306	no	BGLU10	miR773b-3p:BGLU10	0.999996
AT4G27860.2	miR5021	1905	6	0.16635	0.658125	no	MEB1	miR5021:MEB1	0.999996
AT4G28080.1	miR837-5p	3356	6	0.112935	0.580033	no	NA	miR837-5p:AT4G28080.1	0.999996
AT4G29020.2	miR172b-5p	319	5.5	0.141932	0.523524	no	NA	miR172b-5p:AT4G29020.2	0.999996
AT4G29040.1	miR172b-5p	582	6	0.0793599	0.66895	no	RPT2a	miR172b-5p:RPT2a	0.999996
AT4G29540.2	miR840-3p	813	5.5	0.143458	0.472636	no	AtLpxA	miR840-3p:AtLpxA	0.999996
AT4G30067.1	miR172e-3p	103	6	0.108357	0.833571	no	LCR63	miR172e-3p:LCR63	0.999996
AT4G30690.2	miR863-5p	402	6	0.128197	0.266274	no	NA	miR863-5p:AT4G30690.2	0.999996
AT4G30960.1	miR842	378	6	0.352541	0.206283	no	ATCIPK6	miR842:ATCIPK6	0.999996
AT4G31000.2	miR5021	37	6	0.132775	0.69875	no	NA	miR5021:AT4G31000.2	0.999996
AT4G31560.1	miR173-3p	150	6	0.247237	0.651583	no	HCF153	miR173-3p:HCF153	0.999996
AT4G32551.2	miR5021	50	5	0.143458	0.38937	no	LUG	miR5021:LUG	0.999996
AT4G33270.1	miR2934-3p	592	6	0.170929	0.782707	no	AtCDC20.1	miR2934-3p:AtCDC20.1	0.999996
AT4G33490.2	miR5022	1550	6	0.11904	0.425996	no	NA	miR5022:AT4G33490.2	0.999996
AT4G34540.1	miR173-3p	2366	6	0.193821	0.750538	no	NA	miR173-3p:AT4G34540.1	0.999996
AT4G34555.1	miR774b-3p	592	6	0.149563	0.759132	no	NA	miR774b-3p:AT4G34555.1	0.999996
AT4G34630.1	miR414	316	5.5	0.129723	0.652632	no	NA	miR414:AT4G34630.1	0.999996
AT4G35020.3	miR413	477	6	0.15872	0.620174	no	ARAC3	miR413:ARAC3	0.999996
AT4G35090.2	miR5629	858	6	0.299126	0.440546	no	CAT2	miR5629:CAT2	0.999996
AT4G35090.2	miR169a-3p	957	6	0.135827	0.474874	no	CAT2	miR169a-3p:CAT2	0.999996
AT4G36648.1	miR164c-5p	586	6	0.131249	0.166264	no	NA	miR164c-5p:AT4G36648.1	0.999996
AT4G37180.2	miR847	1082	6	0.170929	0.722286	no	NA	miR847:AT4G37180.2	0.999996
AT4G37730.1	miR413	920	6	0.157194	0.784734	no	AtbZIP7	miR413:AtbZIP7	0.999996
AT4G38600.2	miR5629	5466	5.5	0.102252	0.574923	no	KAK	miR5629:KAK	0.999996
AT4G38740.1	miR776	534	6	1.39948	0.700255	no	ROC1	miR776:ROC1	0.999996
AT5G01075.1	miR5021	360	6	0.0320492	0.719222	no	NA	miR5021:AT5G01075.1	0.999996
AT5G01595.1	miR393a-3p	724	6	0.105304	0.698238	no	NA	miR393a-3p:AT5G01595.1	0.999996
AT5G04440.1	miR1886.1	31	5.5	0.558571	0.19257	no	NA	miR1886.1:AT5G04440.1	0.999996
AT5G04810.1	miR5658	2747	5.5	0.410535	0.401627	no	NA	miR5658:AT5G04810.1	0.999996
AT5G05010.2	miR841b-3p	1436	6	0.144984	0.411714	no	NA	miR841b-3p:AT5G05010.2	0.999996
AT5G05750.1	miR870-3p	1272	6	0.149563	0.705123	no	NA	miR870-3p:AT5G05750.1	0.999996
AT5G07350.2	miR773a	2848	6	0.106831	0.606267	no	AtTudor1	miR773a:AtTudor1	0.999996
AT5G08185.4	miR5663-3p	326	5.5	0.0961475	0.120728	no	MIR162A	miR5663-3p:MIR162A	0.999996
AT5G09880.1	miR5021	1798	6	0.386116	0.243873	no	NA	miR5021:AT5G09880.1	0.999996
AT5G10080.1	miR782	1094	6	0.163298	0.537834	no	NA	miR782:AT5G10080.1	0.999996
AT5G11040.1	miR415	3653	6	0.120566	0.486498	no	AtTRS120	miR415:AtTRS120	0.999996
AT5G11850.1	miR5658	2924	6	0.15872	0.629428	no	NA	miR5658:AT5G11850.1	0.999996
AT5G12140.1	miR846-5p	430	6	0.111409	0.536957	no	ATCYS1	miR846-5p:ATCYS1	0.999996
AT5G12240.2	miR8176	126	6	0.137354	0.767309	no	NA	miR8176:AT5G12240.2	0.999996
AT5G12480.2	miR773b-3p	1338	6	0.16635	0.775689	no	CPK7	miR773b-3p:CPK7	0.999996
AT5G13480.2	miR5634	1165	6	0.115988	0.221976	no	FY	miR5634:FY	0.999996
AT5G15530.1	miR3434-3p	762	6	0.135827	0.561165	no	BCCP2	miR3434-3p:BCCP2	0.999996
AT5G19760.1	miR5640	75	6	0.141932	0.783301	no	NA	miR5640:AT5G19760.1	0.999996
AT5G20165.3	miR8172	536	6	0.131249	0.753876	no	NA	miR8172:AT5G20165.3	0.999996
AT5G20240.1	miR840-3p	402	6	0.392221	0.731995	no	PI	miR840-3p:PI	0.999996
AT5G21930.3	miR164a	2576	5.5	0.514313	0.0821991	no	ATHMA8	miR164a:ATHMA8	0.999996
AT5G23740.1	miR399f	552	6	0.819543	0.29767	no	RPS11-BETA	miR399f:RPS11-BETA	0.999996
AT5G23940.1	miR5645a	976	5.5	0.190769	0.626579	no	DCR	miR5645a:DCR	0.999996
AT5G26360.1	miR3434-5p	556	6	0.13888	0.831707	no	NA	miR3434-5p:AT5G26360.1	0.999996
AT5G27700.1	miR417	258	5.5	0.122092	0.354805	no	NA	miR417:AT5G27700.1	0.999996
AT5G28500.2	miR846-3p	431	6	0.146511	0.657116	no	NA	miR846-3p:AT5G28500.2	0.999996
AT5G30510.1	miR167a-5p	616	6	0.309809	0.480206	no	ARRPS1	miR167a-5p:ARRPS1	0.999996
AT5G30510.1	miR169f-3p	850	6	0.555519	0.444649	no	ARRPS1	miR169f-3p:ARRPS1	0.999996
AT5G35210.2	miR865-3p	4946	5.5	0.111409	0.682999	no	PTM	miR865-3p:PTM	0.999996
AT5G36890.2	miR414	1316	6	0.117514	0.728424	no	BGLU42	miR414:BGLU42	0.999996
AT5G37300.1	miR2939	582	6	0.143458	0.74981	no	WSD1	miR2939:WSD1	0.999996
AT5G38480.2	miR167d	721	6	0.122092	0.556477	no	GRF3	miR167d:GRF3	0.999996
AT5G40150.1	miR1886.1	268	5	1.73829	0.384351	no	NA	miR1886.1:AT5G40150.1	0.999996
AT5G40340.1	miR406	1083	5.5	0.151089	0.666738	no	NA	miR406:AT5G40340.1	0.999996
AT5G41760.2	miR3434-3p	826	6	0.129723	0.356016	no	NA	miR3434-3p:AT5G41760.2	0.999996
AT5G42100.2	miR156i	96	5	2.2526	0.21789	no	ATBG_PPAP	miR156i:ATBG_PPAP	0.999996
AT5G42470.1	miR164b-3p	1117	6	0.195347	0.162659	no	NA	miR164b-3p:AT5G42470.1	0.999996
AT5G43460.1	miR829-3p.2	770	5.5	0.155667	0.331653	no	NA	miR829-3p.2:AT5G43460.1	0.999996
AT5G43940.2	miR839-5p	372	6	0.15872	0.497458	no	ADH2	miR839-5p:ADH2	0.999996
AT5G43960.2	miR390a-3p	1535	6	0.152615	0.781628	no	NA	miR390a-3p:AT5G43960.2	0.999996
AT5G45190.2	miR5021	40	5	0.163298	0.0921001	no	NA	miR5021:AT5G45190.2	0.999996
AT5G45390.1	miR5021	36	6	0.106831	0.694516	no	CLPP4	miR5021:CLPP4	0.999996
AT5G45680.1	miR169d	472	6	0.526522	0.72732	no	ATFKBP13	miR169d:ATFKBP13	0.999996
AT5G47210.3	miR771	816	6	0.456319	0.789777	no	NA	miR771:AT5G47210.3	0.999996
AT5G47550.1	miR833a-5p	188	6	0.108357	0.585093	no	NA	miR833a-5p:AT5G47550.1	0.999996
AT5G47840.1	miR156a-3p	31	6	0.718817	0.334173	no	AMK2	miR156a-3p:AMK2	0.999996
AT5G48412.1	miR849	639	5.5	0.129723	0.594457	no	NA	miR849:AT5G48412.1	0.999996
AT5G49550.1	miR5658	376	5.5	0.141932	0.279796	no	BLOS2	miR5658:BLOS2	0.999996
AT5G49615.1	miR390a-5p	166	6	0.120566	0.54218	yes	TAS3b	miR390a-5p:TAS3b	0.999996
AT5G52280.1	miR5998a	809	6	0.11904	0.718695	no	NA	miR5998a:AT5G52280.1	0.999996
AT5G54750.2	miR838	245	6	0.115988	0.739195	no	NA	miR838:AT5G54750.2	0.999996
AT5G55660.1	miR837-5p	436	5.5	0.141932	0.421963	no	NA	miR837-5p:AT5G55660.1	0.999996
AT5G57180.3	miR824-3p	1400	5.5	0.105304	0.639089	no	CIA2	miR824-3p:CIA2	0.999996
AT5G57685.1	miR414	435	6	0.157194	0.579146	no	ATGDU3	miR414:ATGDU3	0.999996
AT5G57685.1	miR4239	490	6	0.128197	0.581512	no	ATGDU3	miR4239:ATGDU3	0.999996
AT5G57960.1	miR396b-5p	195	5.5	0.111409	0.177307	no	NA	miR396b-5p:AT5G57960.1	0.999996
AT5G58270.1	miR5638b	2046	5.5	0.13888	0.645403	no	ABCB25	miR5638b:ABCB25	0.999996
AT5G58420.1	miR1887	960	6	0.161772	0.428811	no	NA	miR1887:AT5G58420.1	0.999996
AT5G59850.1	miR776	311	6	0.251815	0.563647	no	NA	miR776:AT5G59850.1	0.999996
AT5G60340.1	miR397b	369	6	0.140406	0.79389	no	AAK6	miR397b:AAK6	0.999996
AT5G60360.3	miR396b-5p	627	5.5	0.114461	0.54243	no	AALP	miR396b-5p:AALP	0.999996
AT5G60690.1	miR408-5p	2441	6	0.114461	0.695308	no	IFL	miR408-5p:IFL	0.999996
AT5G61770.3	miR172e-3p	727	5.5	0.152615	0.536682	no	PPAN	miR172e-3p:PPAN	0.999996
AT5G61770.3	miR833b	852	6	0.180086	0.621957	no	PPAN	miR833b:PPAN	0.999996
AT5G62210.1	miR2112-5p	659	6	0.114461	0.344091	no	NA	miR2112-5p:AT5G62210.1	0.999996
AT5G63530.2	miR4221	68	6	0.282338	0.509781	no	ATFP3	miR4221:ATFP3	0.999996
AT5G63550.2	miR840-3p	1365	6	0.126671	0.691082	no	NA	miR840-3p:AT5G63550.2	0.999996
AT5G64310.1	miR417	426	6	0.148037	0.791632	no	AGP1	miR417:AGP1	0.999996
AT5G65670.2	miR5998a	817	6	0.1984	0.768157	no	IAA9	miR5998a:IAA9	0.999996
AT5G65670.2	miR390a-3p	939	5.5	0.473107	0.679155	no	IAA9	miR390a-3p:IAA9	0.999996
AT5G65940.3	miR169a-3p	1165	6	0.347963	0.601976	no	CHY1	miR169a-3p:CHY1	0.999996
AT5G66510.2	miR838	96	6	0.134301	0.711753	no	GAMMA CA3	miR838:GAMMA CA3	0.999996
AT5G67580.2	miR156i	1174	6	0.0976737	0.5415	no	ATTBP3	miR156i:ATTBP3	0.999996

## Sheet: SRX003076
Target transcript	miRNA	miRNA slice site position in target transcript	Allen score of sRNA:target duplex	Slice site RPM	Slice site RPM + 1/Maximum adjacent site RPM + 1	Previously verified by 5' RACE?	Target gene common name	Interaction name	P-value adjusted for multiple testing
AT1G30210.2	miR319a	1022	2.5	1.45129	2.45129	yes	ATTCP24	miR319a:ATTCP24	0
AT1G54160.1	miR169h	1294	1.5	2.02506	3.02506	yes	NF-YA5	miR169h:NF-YA5	0
AT1G59710.1	miR414	926	2.5	3.94887	4.94887	no	NA	miR414:AT1G59710.1	0
AT1G77610.1	miR400	1081	5.5	2.00818	3.00818	no	NA	miR400:AT1G77610.1	0
AT2G27400.1	miR173-5p	378	2.5	1.83943	2.83943	yes	TAS1a	miR173-5p:TAS1a	0
AT2G31770.1	miR868-5p	1623	6	2.66633	3.66633	no	ARI9	miR868-5p:ARI9	0
AT2G33810.1	miR156a-5p	796	1.5	5.19765	1.09545	yes	SPL3	miR156a-5p:SPL3	0
AT2G39675.1	miR173-5p	378	2.5	7.12146	2.746	yes	TAS1c	miR173-5p:TAS1c	0
AT2G39681.1	miR173-5p	417	2.5	17.2299	7.54068	yes	TAS2	miR173-5p:TAS2	0
AT2G45160.1	miR171a-3p	1013	0	1.55255	2.55255	yes	ATHAM1	miR171a-3p:ATHAM1	0
AT3G01500.3	miR5658	1175	2	1.48504	0.662552	no	ATBCA1	miR5658:ATBCA1	0
AT3G17185.2	miR390a-5p	863	4.5	21.5331	22.5331	yes	TAS3a	miR390a-5p:TAS3a	0
AT3G44860.1	miR163	330	3	1.83943	2.83943	yes	FAMT	miR163:FAMT	0
AT3G57230.2	miR824-5p	596	0.5	1.02941	2.02941	yes	AGL16	miR824-5p:AGL16	0
AT4G23680.1	miR5658	557	2	4.40451	0.411506	no	NA	miR5658:AT4G23680.1	0
AT4G36920.2	miR172c	1303	1	5.97393	1.91983	yes	AP2	miR172c:AP2	0
AT5G23420.2	miR414	390	2	1.14753	0.56746	no	HMGB6	miR414:HMGB6	0
AT5G24890.1	miR414	772	1	1.68755	0.287335	no	NA	miR414:AT5G24890.1	0
AT5G39740.2	miR414	997	1.5	2.14319	0.428911	no	OLI7	miR414:OLI7	0
AT5G43270.3	miR157a-5p	1112	2	6.95271	7.95271	no	SPL2	miR157a-5p:SPL2	0
AT5G43330.1	miR171c-5p	640	5.5	2.43007	3.43007	no	c-NAD-MDH2	miR171c-5p:c-NAD-MDH2	0
AT5G57735.1	miR390a-5p	428	4.5	18.9174	9.57553	yes	TAS3c	miR390a-5p:TAS3c	0
AT1G79500.5	miR414	1832	3	2.93634	3.93634	no	AtkdsA1	miR414:AtkdsA1	0.00445917
AT5G01430.2	miR5021	59	3	1.95756	2.95756	no	NA	miR5021:AT5G01430.2	0.0257939
AT2G03750.1	miR156h	1113	2.5	1.83943	1.19963	no	NA	miR156h:AT2G03750.1	0.0455107
AT3G11440.1	miR159a	1165	3.5	1.92381	2.92381	yes	ATMYB65	miR159a:ATMYB65	0.0455107
AT3G11200.2	miR414	1081	2.5	2.46382	0.719551	no	AL2	miR414:AL2	0.0573753
AT1G33060.2	miR5658	1822	3.5	1.50192	2.50192	no	ANAC014	miR5658:ANAC014	0.0865862
AT3G52770.1	miR2936	44	4	1.7213	2.7213	no	ZPR3	miR2936:ZPR3	0.0899993
AT5G37780.3	miR414	638	2.5	1.99131	0.266448	no	ACAM-1	miR414:ACAM-1	0.0899993
AT3G60250.2	miR397b	242	4	1.97443	2.97443	yes	CKB3	miR397b:CKB3	0.0964699
AT5G10080.1	miR5658	1506	3	1.21504	2.21504	no	NA	miR5658:AT5G10080.1	0.0964699
AT2G33810.1	miR5021	287	4	2.26132	3.26132	no	SPL3	miR5021:SPL3	0.118183
AT1G14670.1	miR5658	1537	4	1.36692	2.36692	no	NA	miR5658:AT1G14670.1	0.201191
AT2G44130.1	miR414	1246	3	1.7213	0.879951	no	NA	miR414:AT2G44130.1	0.201191
AT1G31730.1	miR5658	3131	3	1.5188	0.828024	no	NA	miR5658:AT1G31730.1	0.209111
AT1G59980.1	miR773b-3p	1464	6	2.12631	3.12631	no	ARL2	miR773b-3p:ARL2	0.270872
AT1G29880.1	miR835-5p	1997	6	2.22757	3.22757	no	NA	miR835-5p:AT1G29880.1	0.276398
AT2G40430.3	miR773b-3p	766	5	1.67067	2.67067	no	NA	miR773b-3p:AT2G40430.3	0.331396
AT5G41340.1	miR414	697	3	0.843775	0.385718	no	ATUBC4	miR414:ATUBC4	0.340471
AT2G36290.1	miR419	1344	4.5	1.63692	2.63692	no	NA	miR419:AT2G36290.1	0.341511
AT4G01883.1	miR173-3p	836	5	1.67067	2.67067	no	NA	miR173-3p:AT4G01883.1	0.341511
AT4G13120.1	miR829-3p.2	2353	5	1.5863	2.5863	no	NA	miR829-3p.2:AT4G13120.1	0.341511
AT4G34180.1	miR5021	828	4	1.68755	2.68755	no	NA	miR5021:AT4G34180.1	0.341511
AT5G04810.1	miR414	2809	3	1.41754	0.359711	no	NA	miR414:AT5G04810.1	0.341511
AT5G44200.2	miR414	905	3.5	3.52698	0.873071	no	ATCBP20	miR414:ATCBP20	0.344408
AT3G01120.1	miR773b-3p	1665	4	3.02071	1.33659	no	AtCGS1	miR773b-3p:AtCGS1	0.350122
AT4G07990.2	miR173-5p	1191	6	3.72949	4.72949	no	NA	miR173-5p:AT4G07990.2	0.359919
AT1G20696.3	miR5021	727	2.5	2.12631	0.365935	no	HMGB3	miR5021:HMGB3	0.364563
AT3G47620.1	miR414	1602	5.5	1.73818	2.73818	no	AtTCP14	miR414:AtTCP14	0.386104
AT5G14740.5	miR5658	1342	3.5	1.77193	0.516116	no	BETA CA2	miR5658:BETA CA2	0.387863
AT5G47560.1	miR840-3p	1259	5.5	1.73818	2.73818	no	ATSDAT	miR840-3p:ATSDAT	0.412366
AT1G52827.1	miR1887	256	3.5	3.4426	0.734828	no	ATCDT1	miR1887:ATCDT1	0.43259
AT4G36790.1	miR415	1559	6	1.68755	2.68755	no	NA	miR415:AT4G36790.1	0.475381
AT3G25520.2	miR414	699	3.5	3.78011	0.481519	no	ATL5	miR414:ATL5	0.494988
AT5G55230.2	miR172c	2003	4	1.18129	0.843402	no	ATMAP65-1	miR172c:ATMAP65-1	0.501154
AT2G41410.1	miR830-3p	953	4	1.26566	0.709389	no	NA	miR830-3p:AT2G41410.1	0.501234
AT1G18800.1	miR414	830	3.5	1.62005	0.384056	no	NRP2	miR414:NRP2	0.504804
AT1G69220.2	miR4221	1778	6	1.70443	2.70443	no	SIK1	miR4221:SIK1	0.52331
AT5G65670.2	miR172b-5p	1057	3.5	1.31629	0.573681	no	IAA9	miR172b-5p:IAA9	0.52331
AT1G16635.1	miR414	199	3.5	1.11378	0.0133107	no	NA	miR414:AT1G16635.1	0.524012
AT1G70780.1	miR172d-5p	414	4	1.83943	0.677754	no	NA	miR172d-5p:AT1G70780.1	0.524012
AT1G70782.1	miR172d-5p	414	4	1.83943	0.677754	no	CPuORF28	miR172d-5p:CPuORF28	0.524012
AT2G11910.2	miR414	442	4	1.41754	0.841416	no	NA	miR414:AT2G11910.2	0.524012
AT5G11380.2	miR447a-3p	1816	5	1.09691	2.09691	no	DXPS3	miR447a-3p:DXPS3	0.529979
AT5G59010.2	miR868-5p	1285	5.5	1.23191	2.23191	no	BSK5	miR868-5p:BSK5	0.541723
AT4G08900.1	miR868-5p	1114	5	1.19816	2.19816	no	ARGAH1	miR868-5p:ARGAH1	0.547721
AT1G63770.5	miR158a-3p	3322	4	3.89824	0.669942	no	NA	miR158a-3p:AT1G63770.5	0.602336
AT1G54270.2	miR838	1447	4	2.34569	0.461861	no	EIF4A-2	miR838:EIF4A-2	0.610724
AT1G71030.1	miR858a	342	4.5	1.62005	0.885882	no	ATMYBL2	miR858a:ATMYBL2	0.62349
AT5G58003.1	miR844-3p	685	6	1.45129	2.45129	no	CPL4	miR844-3p:CPL4	0.62349
AT5G23100.1	miR414	975	5	1.89006	1.06864	no	NA	miR414:AT5G23100.1	0.6307
AT1G80920.1	miR5658	210	5	1.24879	0.963839	no	AtJ8	miR5658:AtJ8	0.653807
AT1G02090.3	miR5648-5p	438	5	1.73818	0.910245	no	ATCSN7	miR5648-5p:ATCSN7	0.682648
AT2G20990.3	miR5014a-5p	2069	4	1.13066	0.222184	no	ATSYTA	miR5014a-5p:ATSYTA	0.687124
AT2G43850.2	miR5014a-3p	1687	5	1.7888	0.821124	no	NA	miR5014a-3p:AT2G43850.2	0.687124
AT3G01460.1	miR3440b-5p	6792	4.5	1.7213	0.706472	no	ATMBD9	miR3440b-5p:ATMBD9	0.687124
AT4G24770.1	miR854a	1111	5.5	14.3104	1.05586	no	ATRBP31	miR854a:ATRBP31	0.687124
AT5G43460.1	miR829-3p.2	770	5.5	4.23575	1.02987	no	NA	miR829-3p.2:AT5G43460.1	0.687124
AT1G48750.1	miR5658	469	4	1.14753	0.223158	no	NA	miR5658:AT1G48750.1	0.706191
AT5G04500.1	miR5021	2560	4	1.7888	0.571315	no	NA	miR5021:AT5G04500.1	0.706191
AT1G72230.1	miR408-3p	823	6	1.33316	2.33316	no	NA	miR408-3p:AT1G72230.1	0.710063
AT3G02290.2	miR413	1340	5	2.00818	0.872708	no	NA	miR413:AT3G02290.2	0.723488
AT1G22850.1	miR414	1074	4.5	1.5863	0.507043	no	NA	miR414:AT1G22850.1	0.755299
AT1G51730.1	miR835-5p	965	4.5	0.978779	0.412504	no	NA	miR835-5p:AT1G51730.1	0.755299
AT1G57750.2	miR414	1303	5	1.89006	1.07535	no	CYP96A15	miR414:CYP96A15	0.761549
AT5G14910.1	miR5647	548	5	1.85631	0.933798	no	NA	miR5647:AT5G14910.1	0.769614
AT3G04670.2	miR396a-5p	1635	5.5	1.6538	1.01288	no	ATWRKY39	miR396a-5p:ATWRKY39	0.780194
AT5G24735.1	miR849	477	4.5	2.93634	0.36546	no	NA	miR849:AT5G24735.1	0.791783
AT2G36850.1	miR838	5971	5	2.22757	0.712963	no	ATGSL08	miR838:ATGSL08	0.803643
AT5G24930.1	miR847	1463	4.5	1.26566	0.366565	no	ATCOL4	miR847:ATCOL4	0.803643
AT1G11840.6	miR156h	1209	4	2.09256	0.0932011	no	ATGLX1	miR156h:ATGLX1	0.826812
AT1G33680.1	miR5661	2446	6	1.63692	1.07573	no	NA	miR5661:AT1G33680.1	0.826812
AT4G08310.1	miR414	1506	4.5	1.46817	0.173856	no	NA	miR414:AT4G08310.1	0.826812
AT4G17240.2	miR393a-3p	1139	5.5	2.27819	0.89827	no	NA	miR393a-3p:AT4G17240.2	0.826812
AT4G24820.2	miR5636	1326	4.5	1.41754	0.206347	no	NA	miR5636:AT4G24820.2	0.826812
AT4G30280.1	miR5025	994	6	1.7213	1.01256	no	ATXTH18	miR5025:ATXTH18	0.826812
AT5G02560.2	miR857	532	5.5	1.77193	0.79253	no	HTA12	miR857:HTA12	0.826812
AT5G51010.1	miR413	526	6	16.1667	1.24016	no	NA	miR413:AT5G51010.1	0.826812
AT1G67590.2	miR5021	1176	6	2.24444	1.12262	no	NA	miR5021:AT1G67590.2	0.841312
AT1G10522.2	miR3434-3p	685	6	0.945028	1.94503	no	PRIN2	miR3434-3p:PRIN2	0.844123
AT2G23080.2	miR774b-5p	1139	5.5	1.82255	0.752538	no	CKA3	miR774b-5p:CKA3	0.851587
AT4G38600.2	miR5629	5466	5.5	1.06316	0.777436	no	KAK	miR5629:KAK	0.861854
AT1G15340.2	miR773a	994	5.5	2.64945	0.777185	no	MBD10	miR773a:MBD10	0.907148
AT1G54850.1	miR3932a	772	5	1.33316	0.451441	no	NA	miR3932a:AT1G54850.1	0.907148
AT2G01450.4	miR5021	1686	4	1.04628	0.121347	no	ATMPK17	miR5021:ATMPK17	0.907148
AT2G21600.1	miR159a	913	5	3.07134	0.443278	no	ATRER1B	miR159a:ATRER1B	0.907148
AT3G10960.1	miR8170-5p	2100	6	1.83943	0.831897	no	ATAZG1	miR8170-5p:ATAZG1	0.907148
AT3G56160.1	miR777	1343	5	1.45129	0.404326	no	NA	miR777:AT3G56160.1	0.907148
AT4G38600.2	miR5021	5771	5	1.04628	0.500531	no	KAK	miR5021:KAK	0.907148
AT5G10400.1	miR414	488	5	1.75505	0.451914	no	NA	miR414:AT5G10400.1	0.907148
AT5G47520.1	miR396b-5p	1041	5.5	3.02071	0.753365	no	AtRABA5a	miR396b-5p:AtRABA5a	0.907148
AT3G18850.5	miR5662	1004	6	1.19816	0.756179	no	LPAT5	miR5662:LPAT5	0.911421
AT5G21940.1	miR5658	806	6	1.50192	0.755424	no	NA	miR5658:AT5G21940.1	0.911421
AT5G65630.1	miR828	2151	5	1.24879	0.26479	no	GTE7	miR828:GTE7	0.911421
AT2G21520.2	miR5998a	2156	5	1.50192	0.268944	no	NA	miR5998a:AT2G21520.2	0.914943
AT2G33630.1	miR870-3p	1490	5.5	3.2401	0.592229	no	NA	miR870-3p:AT2G33630.1	0.914943
AT2G35620.2	miR5652	2133	6	4.55639	0.859104	no	FEI2	miR5652:FEI2	0.914943
AT3G11120.1	miR831-3p	105	5	1.83943	0.104491	no	NA	miR831-3p:AT3G11120.1	0.914943
AT5G48412.1	miR5021	505	6	1.11378	0.62548	no	NA	miR5021:AT5G48412.1	0.914943
AT1G56190.2	miR5021	1580	6	1.53567	0.595651	no	NA	miR5021:AT1G56190.2	0.921466
AT5G26220.1	miR415	838	5.5	2.07569	0.436799	no	NA	miR415:AT5G26220.1	0.924618
AT1G79230.3	miR864-5p	1530	5	0.995655	0.170582	no	ATMST1	miR864-5p:ATMST1	0.929537
AT2G17190.1	miR5662	1924	5.5	2.24444	0.438686	no	NA	miR5662:AT2G17190.1	0.939483
AT3G11590.1	miR173-5p	2133	6	1.92381	0.706432	no	NA	miR173-5p:AT3G11590.1	0.939483
AT1G20693.3	miR390a-3p	589	5.5	1.29941	0.747608	no	HMG BETA 1	miR390a-3p:HMG BETA 1	0.968792
AT5G48412.1	miR849	639	5.5	1.18129	0.473025	no	NA	miR849:AT5G48412.1	0.968792
AT1G49910.1	miR3434-5p	1036	5.5	1.5188	0.442563	no	BUB3.2	miR3434-5p:BUB3.2	0.969668
AT4G17090.1	miR5998a	1652	6	1.5863	0.715297	no	AtBAM3	miR5998a:AtBAM3	0.985835
AT1G68590.2	miR869.1	351	6	0.928153	0.659466	no	PSRP3/1	miR869.1:PSRP3/1	0.98923
AT2G16600.2	miR773b-5p	405	5	3.27385	0.0823802	no	ROC3	miR773b-5p:ROC3	0.98923
AT2G27470.1	miR156f-3p	840	5.5	1.55255	0.426971	no	NF-YB11	miR156f-3p:NF-YB11	0.98923
AT3G61130.1	miR774b-5p	2340	6	2.12631	0.512812	no	GAUT1	miR774b-5p:GAUT1	0.98923
AT1G30230.2	miR5021	834	5	2.21069	0.0968105	no	eEF-1Bb1	miR5021:eEF-1Bb1	0.990575
AT1G31130.1	miR776	1216	5.5	2.07569	0.273145	no	NA	miR776:AT1G31130.1	0.990575
AT2G16600.2	miR414	538	5.5	2.80133	0.0980976	no	ROC3	miR414:ROC3	0.990575
AT3G02080.1	miR5021	569	5.5	1.21504	0.257238	no	NA	miR5021:AT3G02080.1	0.990575
AT3G07820.1	miR833a-5p	992	6	1.83943	0.581687	no	NA	miR833a-5p:AT3G07820.1	0.990575
AT3G49910.1	miR172b-5p	606	5.5	10.6653	0.219568	no	NA	miR172b-5p:AT3G49910.1	0.990575
AT4G15630.1	miR863-3p	641	6	1.19816	0.444174	no	NA	miR863-3p:AT4G15630.1	0.990575
AT5G24450.1	miR414	1813	6	2.14319	0.602273	no	NA	miR414:AT5G24450.1	0.990575
AT1G19310.1	miR844-3p	940	6	1.28254	0.381806	no	NA	miR844-3p:AT1G19310.1	0.998325
AT1G30230.2	miR5665	662	6	2.53133	0.479666	no	eEF-1Bb1	miR5665:eEF-1Bb1	0.998325
AT1G52300.1	miR778	330	6	0.945028	0.229937	no	NA	miR778:AT1G52300.1	0.998325
AT2G13360.2	miR5021	1381	5.5	1.40067	0.191655	no	AGT	miR5021:AGT	0.998325
AT2G37340.3	miR5655	1252	6	0.860651	0.341083	no	AT-RS2Z33	miR5655:AT-RS2Z33	0.998325
AT2G47110.2	miR838	303	6	2.71696	0.411499	no	UBI6	miR838:UBI6	0.998325
AT3G05590.1	miR773a	398	6	1.35004	0.409271	no	RPL18	miR773a:RPL18	0.998325
AT3G50240.1	miR414	3210	6	1.5188	0.474954	no	KICP-02	miR414:KICP-02	0.998325
AT3G52560.4	miR414	784	6	1.63692	0.273054	no	MMZ4	miR414:MMZ4	0.998325
AT3G61980.1	miR3434-5p	563	6	2.93634	0.478716	no	NA	miR3434-5p:AT3G61980.1	0.998325
AT4G33680.1	miR5658	1468	6	0.978779	0.347679	no	AGD2	miR5658:AGD2	0.998325
AT5G12140.1	miR846-5p	430	6	1.7888	0.410825	no	ATCYS1	miR846-5p:ATCYS1	0.998325
AT5G17210.2	miR776	837	6	1.75505	0.231159	no	NA	miR776:AT5G17210.2	0.998325
AT5G28640.1	miR779.1	944	6	1.90693	0.293325	no	AN3	miR779.1:AN3	0.998325

## Sheet: SRX003078
Target transcript	miRNA	miRNA slice site position in target transcript	Allen score of sRNA:target duplex	Slice site RPM	Slice site RPM + 1/Maximum adjacent site RPM + 1	Previously verified by 5' RACE?	Target gene common name	Interaction name	P-value adjusted for multiple testing
AT1G12520.3	miR398a-3p	820	6	1.62108	2.62108	no	ATCCS	miR398a-3p:ATCCS	0
AT1G17590.4	miR169h	1515	2.5	2.32497	2.12908	yes	NF-YA8	miR169h:NF-YA8	0
AT1G27340.1	miR394a	1382	1	1.94814	2.94814	yes	LCR	miR394a:LCR	0
AT1G27360.4	miR156j	1309	0	2.18988	1.68888	no	SPL11	miR156j:SPL11	0
AT1G31280.1	miR403-3p	3232	1	0.62568	0.387769	yes	AGO2	miR403-3p:AGO2	0
AT1G51480.1	miR472-3p	810	1	0.4977	1.4977	yes	NA	miR472-3p:AT1G51480.1	0
AT1G54160.1	miR169h	1294	1.5	4.6926	3.10753	yes	NF-YA5	miR169h:NF-YA5	0
AT1G72830.3	miR169h	1423	2.5	4.73526	3.02515	yes	ATHAP2C	miR169h:ATHAP2C	0
AT1G77850.1	miR160a-5p	1419	0.5	0.63279	1.63279	yes	ARF17	miR160a-5p:ARF17	0
AT2G24550.1	miR414	895	1	1.59264	2.59264	no	NA	miR414:AT2G24550.1	0
AT2G33810.1	miR156a-5p	796	1.5	6.64074	1.81944	yes	SPL3	miR156a-5p:SPL3	0
AT2G39675.1	miR173-5p	378	2.5	5.06943	6.06943	yes	TAS1c	miR173-5p:TAS1c	0
AT2G39681.1	miR173-5p	417	2.5	10.7077	6.39112	yes	TAS2	miR173-5p:TAS2	0
AT2G47020.2	miR408-5p	1567	0	0.62568	0.970295	no	NA	miR408-5p:AT2G47020.2	0
AT3G17185.2	miR390a-5p	863	4.5	14.1702	8.75711	yes	TAS3a	miR390a-5p:TAS3a	0
AT3G27200.1	miR398a-3p	268	5.5	3.59766	2.68712	no	NA	miR398a-3p:AT3G27200.1	0
AT3G57230.2	miR824-5p	596	0.5	2.94354	3.94354	yes	AGL16	miR824-5p:AGL16	0
AT4G29520.1	miR414	779	1.5	1.09494	1.11758	no	NA	miR414:AT4G29520.1	0
AT4G36920.2	miR172c	1303	1	13.5161	6.88241	yes	AP2	miR172c:AP2	0
AT5G06510.3	miR169h	1238	3	1.4931	2.4931	yes	NF-YA10	miR169h:NF-YA10	0
AT5G19590.1	miR854a	60	2	0.71811	1.71811	no	NA	miR854a:AT5G19590.1	0
AT5G39740.2	miR414	997	1.5	0.62568	0.250257	no	OLI7	miR414:OLI7	0
AT5G50570.2	miR156j	976	0	0.44793	1.05164	no	SPL13	miR156j:SPL13	0
AT5G50670.1	miR156j	1111	0	0.44793	1.05164	no	SPL13	miR156j:SPL13	0
AT5G57735.1	miR390a-5p	428	4.5	8.92305	5.37517	yes	TAS3c	miR390a-5p:TAS3c	0
AT5G60120.2	miR172a	1820	1	5.70933	3.85718	yes	TOE2	miR172a:TOE2	0
AT3G15270.1	miR156i	654	2	0.91719	1.91719	yes	SPL5	miR156i:SPL5	0.00208375
AT1G27370.4	miR157a-5p	1325	2	0.73944	1.73944	no	SPL10	miR157a-5p:SPL10	0.0109582
AT5G67180.1	miR172a	1308	3	3.67587	2.53285	yes	TOE3	miR172a:TOE3	0.0131866
AT2G27400.1	miR173-5p	378	2.5	1.46466	2.46466	yes	TAS1a	miR173-5p:TAS1a	0.0156163
AT4G24150.1	miR396a-5p	847	4	1.45755	2.45755	yes	AtGRF8	miR396a-5p:AtGRF8	0.0181696
AT3G11440.1	miR159a	1165	3.5	0.75366	1.75366	yes	ATMYB65	miR159a:ATMYB65	0.0543667
AT5G49330.1	miR858a	385	3	0.53325	1.53325	yes	ATMYB111	miR858a:ATMYB111	0.0714594
AT1G59710.1	miR414	926	2.5	0.68256	0.9673	no	NA	miR414:AT1G59710.1	0.0714748
AT3G21790.1	miR778	615	4	0.77499	1.77499	no	NA	miR778:AT3G21790.1	0.071766
AT5G23420.2	miR414	390	2	0.79632	0.581269	no	HMGB6	miR414:HMGB6	0.071766
AT5G39610.1	miR164c-5p	780	3	0.75366	1.06937	no	ANAC092	miR164c-5p:ANAC092	0.0841117
AT3G25910.1	miR414	1319	2.5	0.67545	0.940155	no	NA	miR414:AT3G25910.1	0.111891
AT5G08280.1	miR397b	652	3.5	0.84609	1.11606	no	HEMC	miR397b:HEMC	0.129028
AT3G05690.1	miR169h	1193	3	0.74655	0.942451	yes	ATHAP2B	miR169h:ATHAP2B	0.139771
AT1G50055.1	miR173-5p	373	4.5	1.97658	2.97658	yes	TAS1b	miR173-5p:TAS1b	0.15254
AT4G23680.1	miR5658	557	2	2.31075	0.392737	no	NA	miR5658:AT4G23680.1	0.175309
AT1G09330.1	miR5021	151	5.5	1.04517	2.04517	no	NA	miR5021:AT1G09330.1	0.181758
AT5G37370.4	miR5998a	1363	2.5	1.64952	0.582582	no	ATSRL1	miR5998a:ATSRL1	0.188614
AT3G50830.1	miR5020b	310	5.5	0.81054	1.81054	no	ATCOR413-PM2	miR5020b:ATCOR413-PM2	0.189668
AT3G60630.1	miR171b-3p	1052	4	0.61857	1.61857	yes	ATHAM2	miR171b-3p:ATHAM2	0.191419
AT5G37780.3	miR414	638	2.5	1.4931	0.347297	no	ACAM-1	miR414:ACAM-1	0.191419
AT2G39020.1	miR414	909	2.5	1.23003	0.265432	no	NA	miR414:AT2G39020.1	0.198608
AT1G08105.1	miR1886.1	2450	4	0.41949	1.16994	no	NA	miR1886.1:AT1G08105.1	0.265068
AT1G62766.1	miR1886.1	1778	4	0.41949	1.16994	no	NA	miR1886.1:AT1G62766.1	0.265068
AT1G63000.1	miR396a-5p	683	4.5	0.65412	1.65412	no	NRS/ER	miR396a-5p:NRS/ER	0.265068
AT5G39060.1	miR1886.1	1394	4	0.41949	1.16994	no	NA	miR1886.1:AT5G39060.1	0.265068
AT3G23810.1	miR172d-5p	976	3.5	0.63279	0.927316	no	ATSAHH2	miR172d-5p:ATSAHH2	0.265444
AT3G29120.1	miR1886.1	243	4	0.3555	1.12379	no	NA	miR1886.1:AT3G29120.1	0.270405
AT1G12820.1	miR393a-5p	1894	4	0.65412	1.65412	yes	AFB3	miR393a-5p:AFB3	0.320325
AT2G31280.4	miR776	2591	5.5	0.72522	1.72522	no	CPUORF7	miR776:CPUORF7	0.33767
AT5G44650.1	miR414	524	4	0.62568	1.62568	no	AtCEST	miR414:AtCEST	0.340888
AT3G50000.1	miR5021	1267	2.5	0.77499	0.950504	no	ATCKA2	miR5021:ATCKA2	0.357807
AT5G01430.2	miR5021	59	3	0.88164	1.14246	no	NA	miR5021:AT5G01430.2	0.359097
AT5G48710.1	miR405a	71	5	0.79632	1.79632	no	NA	miR405a:AT5G48710.1	0.363743
AT1G52590.1	miR837-5p	316	4.5	0.61857	1.61857	no	NA	miR837-5p:AT1G52590.1	0.38078
AT1G05890.2	miR824-5p	2200	3.5	0.5688	0.8433	no	ARI5	miR824-5p:ARI5	0.424393
AT5G16650.1	miR158a-5p	882	3.5	0.79632	0.624364	no	NA	miR158a-5p:AT5G16650.1	0.424393
AT3G13450.1	miR5654-5p	335	5	0.75366	1.75366	no	DIN4	miR5654-5p:DIN4	0.455991
AT1G16880.2	miR5021	47	5	2.48139	1.42485	no	ACR11	miR5021:ACR11	0.457799
AT1G22030.1	miR1886.1	20	4	0.63279	0.94254	no	NA	miR1886.1:AT1G22030.1	0.457799
AT2G23140.2	miR414	2828	3.5	1.01673	0.813565	no	AtPUB4	miR414:AtPUB4	0.457799
AT3G16200.1	miR5021	1454	3	0.65412	0.828967	no	NA	miR5021:AT3G16200.1	0.457799
AT3G28820.1	miR5998a	1362	3.5	0.74655	0.657431	no	NA	miR5998a:AT3G28820.1	0.457799
AT5G18910.1	miR837-5p	867	6	0.73944	1.73944	no	NA	miR837-5p:AT5G18910.1	0.457799
AT5G44200.2	miR414	905	3.5	4.57884	0.813403	no	ATCBP20	miR414:ATCBP20	0.457799
AT1G79750.1	miR837-3p	2249	3.5	1.10916	0.831766	no	ATNADP-ME4	miR837-3p:ATNADP-ME4	0.462256
AT1G60870.1	miR414	693	3	1.2798	0.570905	no	MEE9	miR414:MEE9	0.469185
AT5G04810.1	miR414	2809	3	2.08323	0.286491	no	NA	miR414:AT5G04810.1	0.511576
AT2G36410.3	miR5029	1006	3	0.7821	0.456014	no	NA	miR5029:AT2G36410.3	0.544815
AT1G22850.1	miR414	1074	4.5	2.19699	1.02508	no	NA	miR414:AT1G22850.1	0.588329
AT5G64610.1	miR8165	965	4.5	0.73233	0.995912	no	HAM1	miR8165:HAM1	0.588329
AT4G14270.2	miR831-3p	273	6	0.73944	1.73944	no	NA	miR831-3p:AT4G14270.2	0.60659
AT1G52827.1	miR1887	256	3.5	1.48599	0.489944	no	ATCDT1	miR1887:ATCDT1	0.625544
AT5G14480.1	miR156i	1686	4	0.76077	1.03338	no	NA	miR156i:AT5G14480.1	0.625544
AT1G20696.3	miR5021	727	2.5	0.72522	0.269414	no	HMGB3	miR5021:HMGB3	0.635256
AT5G62680.1	miR158a-5p	2178	4.5	1.19448	1.02661	no	GTR2	miR158a-5p:GTR2	0.639837
AT1G71030.1	miR858a	342	4.5	0.76788	1.01221	no	ATMYBL2	miR858a:ATMYBL2	0.646087
AT5G24735.1	miR1886.1	63	3.5	0.91719	0.194881	no	NA	miR1886.1:AT5G24735.1	0.646087
AT1G62500.1	miR161.2	778	5	0.83898	1.04022	no	NA	miR161.2:AT1G62500.1	0.652589
AT3G25520.2	miR414	699	3.5	4.51485	0.382346	no	ATL5	miR414:ATL5	0.675671
AT3G52230.1	miR414	512	4	1.21581	0.795734	no	NA	miR414:AT3G52230.1	0.675671
AT5G61240.2	miR5028	1191	4.5	0.71811	0.906243	no	NA	miR5028:AT5G61240.2	0.675671
AT1G48160.1	miR782	883	4	0.59724	0.725494	no	NA	miR782:AT1G48160.1	0.695214
AT1G68720.1	miR5658	3992	5	1.37223	1.21482	no	ATTADA	miR5658:ATTADA	0.695214
AT3G22320.1	miR5021	57	4	0.88875	0.89249	no	ATRPABC24.3	miR5021:ATRPABC24.3	0.713312
AT2G23350.1	miR854a	2192	5.5	1.36512	1.22456	no	PAB4	miR854a:PAB4	0.714004
AT2G39770.2	miR865-3p	646	5	0.7821	1.01622	no	CYT1	miR865-3p:CYT1	0.714004
AT3G54190.1	miR5658	1689	5	0.73944	0.976062	no	NA	miR5658:AT3G54190.1	0.723231
AT5G06430.1	miR774b-5p	608	6	0.94563	1.26896	no	NA	miR774b-5p:AT5G06430.1	0.723231
AT1G20693.3	miR414	583	5.5	2.12589	1.18297	no	HMG BETA 1	miR414:HMG BETA 1	0.725752
AT1G14000.1	miR5021	1676	4.5	0.77499	0.936245	no	VIK	miR5021:VIK	0.7264
AT2G19480.3	miR414	1205	4	0.67545	0.673957	no	NAP1;2	miR414:NAP1;2	0.7264
AT3G44750.2	miR414	472	4.5	0.54747	0.900682	no	ATHD2A	miR414:ATHD2A	0.741993
AT3G51880.4	miR414	542	4	1.45044	0.653177	no	AtHMGB1	miR414:AtHMGB1	0.741993
AT5G64990.2	miR774b-5p	641	4.5	0.79632	0.780625	no	AtRABH1a	miR774b-5p:AtRABH1a	0.767153
AT1G17130.2	miR414	1116	4.5	0.59724	0.858588	no	NA	miR414:AT1G17130.2	0.790935
AT5G08280.1	miR847	1357	4.5	1.86993	0.859469	no	HEMC	miR847:HEMC	0.790935
AT1G13280.1	miR172b-5p	973	6	1.4931	1.07347	no	AOC4	miR172b-5p:AOC4	0.791009
AT1G20590.1	miR447a.2-3p	325	6	0.3555	0.989618	no	NA	miR447a.2-3p:AT1G20590.1	0.791009
AT1G20610.1	miR447a.2-3p	1299	6	0.3555	0.989618	no	CYCB2;3	miR447a.2-3p:CYCB2;3	0.791009
AT1G54270.2	miR838	1447	4	1.3509	0.372498	no	EIF4A-2	miR838:EIF4A-2	0.791009
AT1G54850.1	miR3932a	772	5	0.76077	0.915018	no	NA	miR3932a:AT1G54850.1	0.791009
AT1G58410.1	miR162a-3p	2632	6	1.40778	1.37859	no	NA	miR162a-3p:AT1G58410.1	0.791009
AT1G63770.5	miR158a-3p	3322	4	0.711	0.434658	no	NA	miR158a-3p:AT1G63770.5	0.791009
AT1G71340.1	miR837-5p	1447	5	0.6399	0.878163	no	AtGDPD4	miR837-5p:AtGDPD4	0.791009
AT1G71840.1	miR5650	1410	4.5	0.8532	0.690187	no	NA	miR5650:AT1G71840.1	0.791009
AT1G79050.2	miR868-3p	1065	5.5	0.64701	0.974752	no	RECA1	miR868-3p:RECA1	0.791009
AT2G11910.2	miR414	442	4	0.57591	0.571775	no	NA	miR414:AT2G11910.2	0.791009
AT2G21600.1	miR159a	913	5	3.00753	0.892345	no	ATRER1B	miR159a:ATRER1B	0.791009
AT2G27470.1	miR156f-3p	840	5.5	2.17566	1.29221	no	NF-YB11	miR156f-3p:NF-YB11	0.791009
AT2G35490.1	miR399c-5p	1185	6	6.09327	1.30814	no	NA	miR399c-5p:AT2G35490.1	0.791009
AT3G01500.3	miR5658	1200	4	0.75366	0.200258	no	ATBCA1	miR5658:ATBCA1	0.791009
AT3G15480.1	miR849	733	4	0.57591	0.338058	no	NA	miR849:AT3G15480.1	0.791009
AT3G22910.1	miR830-5p	2796	5	0.89586	0.940066	no	NA	miR830-5p:AT3G22910.1	0.791009
AT3G23810.1	miR5021	1697	4	0.72522	0.706094	no	ATSAHH2	miR5021:ATSAHH2	0.791009
AT3G46000.1	miR5021	131	6	0.86742	0.94258	no	ADF2	miR5021:ADF2	0.791009
AT3G53370.2	miR866-3p	263	5	1.58553	0.947869	no	NA	miR866-3p:AT3G53370.2	0.791009
AT3G55210.1	miR838	544	5.5	0.09954	1.04036	no	anac063	miR838:anac063	0.791009
AT3G61130.1	miR774b-5p	2340	6	2.55249	1.05267	no	GAUT1	miR774b-5p:GAUT1	0.791009
AT3G61790.1	miR5657	1272	6	0.89586	1.0944	no	NA	miR5657:AT3G61790.1	0.791009
AT3G62010.2	miR835-5p	3849	5.5	0.93852	0.992718	no	NA	miR835-5p:AT3G62010.2	0.791009
AT4G00238.1	miR3434-5p	1321	4.5	0.75366	0.661878	no	NA	miR3434-5p:AT4G00238.1	0.791009
AT4G16760.2	miR5021	2235	3.5	0.711	0.411611	no	ACX1	miR5021:ACX1	0.791009
AT4G20530.1	miR5638a	669	5.5	0.10665	0.98109	no	NA	miR5638a:AT4G20530.1	0.791009
AT4G20540.1	miR5638a	669	5.5	0.10665	0.98109	no	NA	miR5638a:AT4G20540.1	0.791009
AT4G20550.1	miR5638a	714	5.5	0.10665	0.98109	no	NA	miR5638a:AT4G20550.1	0.791009
AT4G20560.1	miR5638a	714	5.5	0.10665	0.98109	no	NA	miR5638a:AT4G20560.1	0.791009
AT4G20570.1	miR5638a	714	5.5	0.10665	0.98109	no	NA	miR5638a:AT4G20570.1	0.791009
AT4G20580.1	miR5638a	714	5.5	0.10665	0.98109	no	NA	miR5638a:AT4G20580.1	0.791009
AT4G20590.1	miR5638a	714	5.5	0.10665	0.98109	no	NA	miR5638a:AT4G20590.1	0.791009
AT4G20600.1	miR5638a	714	5.5	0.10665	0.98109	no	NA	miR5638a:AT4G20600.1	0.791009
AT4G20610.1	miR5638a	714	5.5	0.10665	0.98109	no	NA	miR5638a:AT4G20610.1	0.791009
AT4G20620.1	miR5638a	714	5.5	0.10665	0.98109	no	NA	miR5638a:AT4G20620.1	0.791009
AT4G20630.1	miR5638a	669	5.5	0.10665	0.98109	no	NA	miR5638a:AT4G20630.1	0.791009
AT4G20640.1	miR5638a	714	5.5	0.10665	0.98109	no	NA	miR5638a:AT4G20640.1	0.791009
AT4G20650.1	miR5638a	669	5.5	0.10665	0.98109	no	NA	miR5638a:AT4G20650.1	0.791009
AT4G21160.4	miR829-5p	1267	5	0.73233	0.920649	no	AGD12	miR829-5p:AGD12	0.791009
AT4G25770.2	miR868-3p	1416	4.5	0.60435	0.591245	no	NA	miR868-3p:AT4G25770.2	0.791009
AT4G30935.1	miR3434-5p	1487	4.5	0.73944	0.744407	no	ATWRKY32	miR3434-5p:ATWRKY32	0.791009
AT4G32260.1	miR5021	895	3	2.43162	0.0799527	no	PDE334	miR5021:PDE334	0.791009
AT4G32880.1	miR858a	2831	5.5	0.9243	1.19943	no	ATHB-8	miR858a:ATHB-8	0.791009
AT5G03320.1	miR172b-5p	1498	5.5	0.68967	0.92959	no	NA	miR172b-5p:AT5G03320.1	0.791009
AT5G20070.1	miR2936	1339	6	0.95985	1.04552	no	ATNUDT19	miR2936:ATNUDT19	0.791009
AT5G46915.1	miR414	844	5.5	1.64952	0.98938	no	NA	miR414:AT5G46915.1	0.791009
AT5G58710.1	miR8172	706	5	2.11878	0.865784	no	ROC7	miR8172:ROC7	0.791009
AT5G65060.2	miR2112-3p	717	5	2.844	0.894153	no	AGL70	miR2112-3p:AGL70	0.791009
AT3G17185.2	miR390a-5p	619	5	1.81305	0.868319	yes	TAS3a	miR390a-5p:TAS3a	0.812259
AT1G11840.6	miR156h	1209	4	8.0343	0.404324	no	ATGLX1	miR156h:ATGLX1	0.815907
AT1G30860.1	miR837-5p	2442	6	0.76077	1.04648	no	NA	miR837-5p:AT1G30860.1	0.815907
AT3G02290.2	miR413	1340	5	1.32957	0.860763	no	NA	miR413:AT3G02290.2	0.81816
AT1G10740.4	miR5658	1758	5.5	1.64241	0.894141	no	NA	miR5658:AT1G10740.4	0.820333
AT2G35010.2	miR780.1	747	4.5	0.78921	0.332582	no	ATO1	miR780.1:ATO1	0.820333
AT2G46030.1	miR172b-5p	328	5.5	0.72522	0.913419	no	UBC6	miR172b-5p:UBC6	0.820333
AT3G20520.1	miR5017-5p	2205	5	0.81765	0.680551	no	GDPDL5	miR5017-5p:GDPDL5	0.820333
AT3G51940.1	miR8173	1624	5	0.50481	0.799733	no	NA	miR8173:AT3G51940.1	0.820333
AT4G27860.2	miR5021	1905	6	0.59013	0.895853	no	MEB1	miR5021:MEB1	0.820333
AT5G65650.1	miR5658	806	4.5	0.63279	0.505111	no	NA	miR5658:AT5G65650.1	0.820333
AT4G38620.1	miR858a	615	5.5	0.72522	0.968083	no	ATMYB4	miR858a:ATMYB4	0.823032
AT5G24930.1	miR847	1463	4.5	1.29402	0.442196	no	ATCOL4	miR847:ATCOL4	0.82395
AT5G56360.1	miR776	2115	5.5	2.37474	1.43118	no	PSL4	miR776:PSL4	0.844335
AT4G35830.2	miR5021	3068	4	0.77499	0.506746	no	ACO1	miR5021:ACO1	0.845012
AT3G20650.2	miR407	978	5.5	0.49059	0.849988	no	NA	miR407:AT3G20650.2	0.848573
AT1G14440.2	miR5645a	1093	5	0.70389	0.718265	no	AtHB31	miR5645a:AtHB31	0.861112
AT1G60870.1	miR5021	212	5	0.83187	0.710462	no	MEE9	miR5021:MEE9	0.861112
AT2G27980.1	miR773a	3423	6	0.66834	1	no	NA	miR773a:AT2G27980.1	0.861112
AT3G53920.1	miR157d	1879	5.5	0.86742	0.80407	no	SIG3	miR157d:SIG3	0.861112
AT5G07350.2	miR773a	2848	6	0.711	1	no	AtTudor1	miR773a:AtTudor1	0.861112
AT1G14310.1	miR829-5p	770	4.5	0.88875	0.290755	no	NA	miR829-5p:AT1G14310.1	0.865094
AT3G12860.1	miR838	1575	5	0.62568	0.683248	no	NA	miR838:AT3G12860.1	0.865094
AT5G27300.2	miR824-3p	536	6	0.68256	0.991619	no	NA	miR824-3p:AT5G27300.2	0.867024
AT1G14010.1	miR4228-5p	487	5.5	1.19448	1.25647	no	NA	miR4228-5p:AT1G14010.1	0.873338
AT1G17780.2	miR774b-3p	1069	6	0.61146	1.61146	no	NA	miR774b-3p:AT1G17780.2	0.873338
AT1G57620.1	miR4245	870	4.5	0.80343	0.751219	no	NA	miR4245:AT1G57620.1	0.873338
AT1G68560.1	miR5650	2677	5	1.44333	0.737999	no	ATXYL1	miR5650:ATXYL1	0.873338
AT1G80930.1	miR5641	2854	6	0.7821	1.00804	no	NA	miR5641:AT1G80930.1	0.873338
AT2G28600.1	miR162a-5p	1576	5.5	0.96696	1.15439	no	NA	miR162a-5p:AT2G28600.1	0.873338
AT2G40290.3	miR837-5p	1038	6	0.59724	1.59724	no	NA	miR837-5p:AT2G40290.3	0.873338
AT3G49880.1	miR157d	1913	5.5	0.75366	1.01648	no	NA	miR157d:AT3G49880.1	0.873338
AT4G01370.1	miR415	1315	5.5	0.65412	0.896013	no	ATMPK4	miR415:ATMPK4	0.873338
AT4G24830.2	miR5641	1579	5	0.6399	0.891744	no	NA	miR5641:AT4G24830.2	0.873338
AT4G39960.1	miR835-5p	1511	5.5	0.78921	0.980518	no	NA	miR835-5p:AT4G39960.1	0.873338
AT5G23290.1	miR5646	286	6	0.5688	1.5688	no	PFD5	miR5646:PFD5	0.873338
AT1G14320.2	miR447c-3p	453	6	1.6353	1.1109	no	RPL10	miR447c-3p:RPL10	0.874678
AT2G43850.2	miR5014a-3p	1687	5	1.20159	0.782635	no	NA	miR5014a-3p:AT2G43850.2	0.874678
AT2G16710.3	miR866-3p	455	5	1.42911	0.673001	no	NA	miR866-3p:AT2G16710.3	0.877541
AT5G13630.2	miR773a	3940	6	0.73233	0.983848	no	ABAR	miR773a:ABAR	0.877541
AT2G02050.1	miR5640	379	5.5	0.8532	0.825755	no	NA	miR5640:AT2G02050.1	0.883561
AT2G22840.1	miR834	1660	6	1.35801	1.29223	no	AtGRF1	miR834:AtGRF1	0.883561
AT2G36850.1	miR838	5971	5	1.66374	0.7182	no	ATGSL08	miR838:ATGSL08	0.883561
AT4G08310.1	miR414	1506	4.5	0.9954	0.269168	no	NA	miR414:AT4G08310.1	0.883561
AT4G24820.2	miR5636	1326	4.5	0.66123	0.296263	no	NA	miR5636:AT4G24820.2	0.883561
AT5G10400.1	miR414	488	5	3.15684	0.779896	no	NA	miR414:AT5G10400.1	0.883561
AT5G23740.1	miR399f	552	6	7.50105	1.04914	no	RPS11-BETA	miR399f:RPS11-BETA	0.883561
AT2G19080.1	miR414	1002	5	0.66123	0.749717	no	NA	miR414:AT2G19080.1	0.884098
AT5G24735.1	miR849	477	4.5	0.65412	0.165156	no	NA	miR849:AT5G24735.1	0.884098
AT1G22970.1	miR841b-5p	1122	5.5	0.64701	0.913265	no	NA	miR841b-5p:AT1G22970.1	0.887901
AT1G07370.1	miR5998a	618	6	0.76788	0.965068	no	ATPCNA1	miR5998a:ATPCNA1	0.887969
AT4G23040.1	miR5021	1751	6	0.95985	0.799795	no	NA	miR5021:AT4G23040.1	0.887969
AT2G21520.2	miR5998a	2156	5	3.15684	0.589572	no	NA	miR5998a:AT2G21520.2	0.893426
AT2G17420.1	miR414	817	6	0.68256	0.963362	no	ATNTRA	miR414:ATNTRA	0.900378
AT3G03630.1	miR5021	1470	5	0.90297	0.797406	no	CS26	miR5021:CS26	0.905401
AT3G56160.1	miR777	1343	5	0.81765	0.528582	no	NA	miR777:AT3G56160.1	0.905401
AT5G11420.1	miR393b-3p	1440	6	1.91259	1.03539	no	NA	miR393b-3p:AT5G11420.1	0.905401
AT5G65630.1	miR828	2151	5	1.00962	0.497927	no	GTE7	miR828:GTE7	0.907297
AT2G29720.1	miR776	1405	5.5	0.68256	0.887492	no	CTF2B	miR776:CTF2B	0.907456
AT5G01350.1	miR156j	459	4.5	0.9243	0.449843	no	NA	miR156j:AT5G01350.1	0.907456
AT5G18550.1	miR5021	1819	5	0.88875	0.791448	no	NA	miR5021:AT5G18550.1	0.907456
AT1G68590.2	miR869.1	351	6	0.6399	0.954479	no	PSRP3/1	miR869.1:PSRP3/1	0.908164
AT1G10650.2	miR5014a-3p	1416	5.5	0.64701	0.72019	no	NA	miR5014a-3p:AT1G10650.2	0.91334
AT2G36145.1	miR396b-5p	563	6	0.74655	0.96846	no	NA	miR396b-5p:AT2G36145.1	0.916654
AT4G17240.2	miR393a-3p	1139	5.5	0.55458	0.882898	no	NA	miR393a-3p:AT4G17240.2	0.922785
AT1G79230.3	miR864-5p	1530	5	0.80343	0.506638	no	ATMST1	miR864-5p:ATMST1	0.9257
AT5G50840.2	miR782	1038	5.5	0.52614	0.808016	no	NA	miR782:AT5G50840.2	0.927178
AT5G58250.1	miR4245	718	5	0.65412	0.485038	no	EMB3143	miR4245:EMB3143	0.927178
AT2G35040.2	miR5998a	1945	5	0.81765	0.455174	no	NA	miR5998a:AT2G35040.2	0.933031
AT5G08300.1	miR171b-3p	1090	5	0.71811	0.413321	no	NA	miR171b-3p:AT5G08300.1	0.933031
AT3G49910.1	miR172b-5p	606	5.5	15.9548	0.744353	no	NA	miR172b-5p:AT3G49910.1	0.93848
AT2G01450.4	miR5021	1686	4	0.75366	0.29765	no	ATMPK17	miR5021:ATMPK17	0.939388
AT3G27810.1	miR858a	499	5	0.73944	0.54897	no	ATMYB21	miR858a:ATMYB21	0.939388
AT4G20670.1	miR5638a	756	5.5	0.6399	0.759589	no	NA	miR5638a:AT4G20670.1	0.940002
AT5G14910.1	miR5647	548	5	0.62568	0.630495	no	NA	miR5647:AT5G14910.1	0.940488
AT3G53460.4	miR403-5p	1385	5	0.79632	0.1822	no	CP29	miR403-5p:CP29	0.972703
AT4G12420.2	miR414	2007	5	0.64701	0.485993	no	SKU5	miR414:SKU5	0.972703
AT5G04810.1	miR5658	2747	5.5	0.81765	0.595016	no	NA	miR5658:AT5G04810.1	0.978966
AT1G61780.1	miR5633	575	5	0.61857	0.431438	no	NA	miR5633:AT1G61780.1	0.979413
AT2G20420.1	miR3434-3p	1577	6	0.73233	0.762238	no	NA	miR3434-3p:AT2G20420.1	0.979413
AT2G20890.1	miR838	906	5.5	0.5688	0.615221	no	PSB29	miR838:PSB29	0.979413
AT2G33120.3	miR824-3p	577	5.5	0.49059	0.749684	no	ATVAMP722	miR824-3p:ATVAMP722	0.979413
AT2G45245.4	miR846-5p	939	5.5	0.87453	0.628259	no	NA	miR846-5p:AT2G45245.4	0.979413
AT2G45260.1	miR846-5p	1466	5.5	0.98118	0.615594	no	NA	miR846-5p:AT2G45260.1	0.979413
AT3G16260.1	miR779.1	2704	5.5	0.74655	0.710687	no	TRZ4	miR779.1:TRZ4	0.979413
AT4G23820.1	miR870-5p	1356	5	0.711	0.396684	no	NA	miR870-5p:AT4G23820.1	0.979413
AT5G22700.1	miR167a-3p	1438	5	2.2041	0.346213	no	NA	miR167a-3p:AT5G22700.1	0.979413
AT5G25560.4	miR396a-3p	2650	5	4.23756	0.219787	no	NA	miR396a-3p:AT5G25560.4	0.979413
AT5G37780.3	miR414	560	5	0.76077	0.389598	no	ACAM-1	miR414:ACAM-1	0.979413
AT3G11120.1	miR831-3p	105	5	0.73944	0.22329	no	NA	miR831-3p:AT3G11120.1	0.980298
AT3G46030.1	miR4243	261	5.5	0.68967	0.641168	no	HTB11	miR4243:HTB11	0.980298
AT1G27400.1	miR773a	591	5	2.75157	0.139713	no	NA	miR773a:AT1G27400.1	0.982298
AT1G65840.1	miR5021	1998	5.5	0.82476	0.513657	no	ATPAO4	miR5021:ATPAO4	0.982298
AT2G45820.1	miR5021	738	6	0.7821	0.591641	no	NA	miR5021:AT2G45820.1	0.982298
AT3G15840.5	miR4239	802	6	0.51192	0.848392	no	PIFI	miR4239:PIFI	0.982298
AT5G05750.1	miR870-3p	1272	6	1.422	0.78554	no	NA	miR870-3p:AT5G05750.1	0.982298
AT1G02840.3	miR864-5p	1081	5	0.66834	0.0708337	no	At-SR34	miR864-5p:At-SR34	0.984426
AT3G26740.1	miR5658	208	5	0.69678	0.254246	no	CCL	miR5658:CCL	0.984426
AT5G37370.4	miR5012	1257	5.5	2.16855	0.556609	no	ATSRL1	miR5012:ATSRL1	0.984426
AT1G48380.2	miR396a-5p	1173	6	0.49059	0.897281	no	HYP7	miR396a-5p:HYP7	0.987683
AT1G56190.2	miR5021	1580	6	0.80343	0.751219	no	NA	miR5021:AT1G56190.2	0.987683
AT2G20270.2	miR773a	617	6	0.66834	0.900248	no	NA	miR773a:AT2G20270.2	0.987683
AT5G47520.1	miR396b-5p	1041	5.5	0.53325	0.681033	no	AtRABA5a	miR396b-5p:AtRABA5a	0.987683
AT5G48412.1	miR849	639	5.5	0.71811	0.666342	no	NA	miR849:AT5G48412.1	0.987683
AT1G19310.1	miR844-3p	940	6	2.95776	0.742545	no	NA	miR844-3p:AT1G19310.1	0.992272
AT2G27470.1	miR414	850	5.5	0.7821	0.561175	no	NF-YB11	miR414:NF-YB11	0.99359
AT3G03540.1	miR414	1489	5.5	0.71811	0.537415	no	NPC5	miR414:NPC5	0.99359
AT3G03540.1	miR398a-5p	1545	6	1.34379	0.620049	no	NPC5	miR398a-5p:NPC5	0.99359
AT4G35300.5	miR3932a	2239	5.5	0.71811	0.474146	no	TMT2	miR3932a:TMT2	0.99359
AT5G27700.1	miR164c-5p	50	6	1.55709	0.798068	no	NA	miR164c-5p:AT5G27700.1	0.99359
AT1G02560.1	miR5998a	928	6	0.62568	0.635754	no	CLPP5	miR5998a:CLPP5	0.99524
AT1G04590.2	miR5998a	1209	5.5	0.7821	0.260643	no	NA	miR5998a:AT1G04590.2	0.99524
AT1G07110.1	miR5640	2548	6	3.1284	0.541322	no	ATF2KP	miR5640:ATF2KP	0.99524
AT1G09340.1	miR850	1381	6	1.84149	0.525404	no	CRB	miR850:CRB	0.99524
AT1G18090.2	miR863-5p	1714	6	0.65412	0.629376	no	NA	miR863-5p:AT1G18090.2	0.99524
AT1G18260.1	miR416	2259	6	0.59724	0.794797	no	EBS5	miR416:EBS5	0.99524
AT1G30230.2	miR5021	834	5	2.32497	0.191686	no	eEF-1Bb1	miR5021:eEF-1Bb1	0.99524
AT1G31130.1	miR776	1216	5.5	1.9197	0.305849	no	NA	miR776:AT1G31130.1	0.99524
AT1G44900.2	miR780.2	2954	5.5	0.83898	0.459697	no	ATMCM2	miR780.2:ATMCM2	0.99524
AT1G49975.1	miR414	455	5.5	0.61146	0.372378	no	NA	miR414:AT1G49975.1	0.99524
AT1G69340.1	miR5021	2040	6	0.81054	0.523268	no	NA	miR5021:AT1G69340.1	0.99524
AT1G78650.1	miR5650	1545	5.5	1.47888	0.431682	no	POLD3	miR5650:POLD3	0.99524
AT2G13360.2	miR5021	1381	5.5	2.133	0.375771	no	AGT	miR5021:AGT	0.99524
AT2G16600.2	miR773b-5p	405	5	1.36512	0.107945	no	ROC3	miR773b-5p:ROC3	0.99524
AT2G16600.2	miR414	538	5.5	4.27311	0.319724	no	ROC3	miR414:ROC3	0.99524
AT2G17190.1	miR5662	1924	5.5	0.46215	0.404302	no	NA	miR5662:AT2G17190.1	0.99524
AT2G19480.3	miR5012	1319	5.5	0.73944	0.318283	no	NAP1;2	miR5012:NAP1;2	0.99524
AT2G22980.4	miR846-5p	1289	5.5	0.74655	0.301168	no	SCPL13	miR846-5p:SCPL13	0.99524
AT2G37400.1	miR838	729	6	0.78921	0.707575	no	NA	miR838:AT2G37400.1	0.99524
AT2G48120.2	miR824-3p	587	6	0.50481	0.720753	no	PAC	miR824-3p:PAC	0.99524
AT3G01130.2	miR5021	290	5	0.93141	0.305	no	NA	miR5021:AT3G01130.2	0.99524
AT3G10060.1	miR390a-5p	697	6	0.711	0.565368	no	NA	miR390a-5p:AT3G10060.1	0.99524
AT4G24770.1	miR854a	1111	5.5	3.19239	0.329293	no	ATRBP31	miR854a:ATRBP31	0.99524
AT4G24960.3	miR414	695	5.5	1.39356	0.432905	no	ATHVA22D	miR414:ATHVA22D	0.99524
AT4G25340.2	miR5634	1533	5.5	0.74655	0.375236	no	ATFKBP53	miR5634:ATFKBP53	0.99524
AT4G39850.3	miR838	4600	5.5	0.60435	0.3763	no	ABCD1	miR838:ABCD1	0.99524
AT5G20240.1	miR840-3p	402	6	0.59013	0.715334	no	PI	miR840-3p:PI	0.99524
AT5G24450.1	miR414	1813	6	1.46466	0.685551	no	NA	miR414:AT5G24450.1	0.99524
AT1G30230.2	miR5665	662	6	1.00962	0.423348	no	eEF-1Bb1	miR5665:eEF-1Bb1	0.999065
AT1G49910.1	miR169f-3p	1050	6	0.86031	0.448297	no	BUB3.2	miR169f-3p:BUB3.2	0.999065
AT1G50450.1	miR4221	1316	6	1.51443	0.203403	no	NA	miR4221:AT1G50450.1	0.999065
AT1G53850.2	miR5632-5p	954	6	0.66123	0.279935	no	ATPAE1	miR5632-5p:ATPAE1	0.999065
AT1G68300.1	miR2939	621	6	0.67545	0.442407	no	NA	miR2939:AT1G68300.1	0.999065
AT2G01490.1	miR5655	1039	6	1.02384	0.340631	no	PAHX	miR5655:PAHX	0.999065
AT2G03150.1	miR157d	4243	5.5	1.34379	0.10852	no	emb1579	miR157d:emb1579	0.999065
AT2G28350.1	miR8168	2064	6	0.65412	0.350558	no	ARF10	miR8168:ARF10	0.999065
AT2G37340.3	miR5655	1252	6	0.76077	0.180284	no	AT-RS2Z33	miR5655:AT-RS2Z33	0.999065
AT2G47110.2	miR838	303	6	1.72773	0.577219	no	UBI6	miR838:UBI6	0.999065
AT3G08520.1	miR831-3p	29	6	0.65412	0.501776	no	NA	miR831-3p:AT3G08520.1	0.999065
AT3G09410.3	miR5024-3p	1737	6	0.5688	0.511175	no	NA	miR5024-3p:AT3G09410.3	0.999065
AT3G09980.1	miR5021	909	6	1.83438	0.302315	no	NA	miR5021:AT3G09980.1	0.999065
AT3G18680.1	miR5638a	1094	6	0.57591	0.458283	no	NA	miR5638a:AT3G18680.1	0.999065
AT3G51520.1	miR829-3p.2	1148	6	0.66834	0.391962	no	DGAT2	miR829-3p.2:DGAT2	0.999065
AT3G52560.4	miR414	784	6	0.73233	0.239657	no	MMZ4	miR414:MMZ4	0.999065
AT3G56020.1	miR831-3p	71	6	2.68758	0.246781	no	NA	miR831-3p:AT3G56020.1	0.999065
AT3G61980.1	miR3434-5p	563	6	1.47888	0.462	no	NA	miR3434-5p:AT3G61980.1	0.999065
AT4G04640.1	miR5021	1310	6	0.73944	0.076104	no	ATPC1	miR5021:ATPC1	0.999065
AT4G09620.1	miR837-5p	922	6	0.59013	0.513367	no	NA	miR837-5p:AT4G09620.1	0.999065
AT4G17270.1	miR5663-5p	1285	6	1.41489	0.316644	no	NA	miR5663-5p:AT4G17270.1	0.999065
AT4G29380.1	miR773a	4476	6	0.61857	0.520161	no	AtVPS15	miR773a:AtVPS15	0.999065
AT4G31170.4	miR403-3p	1058	6	0.64701	0.392192	no	NA	miR403-3p:AT4G31170.4	0.999065
AT5G01350.1	miR172b-5p	447	5.5	2.16144	0.124215	no	NA	miR172b-5p:AT5G01350.1	0.999065
AT5G09880.1	miR5021	1798	6	1.74906	0.180201	no	NA	miR5021:AT5G09880.1	0.999065
AT5G17210.2	miR776	837	6	2.4174	0.408836	no	NA	miR776:AT5G17210.2	0.999065
AT5G28640.1	miR779.1	944	6	2.10456	0.565131	no	AN3	miR779.1:AN3	0.999065
AT5G40480.1	miR4239	5837	6	0.69678	0.199597	no	EMB3012	miR4239:EMB3012	0.999065
AT5G41140.2	miR5659	2899	6	0.78921	0.541587	no	NA	miR5659:AT5G41140.2	0.999065
AT5G42030.1	miR5014a-5p	976	6	0.5688	0.385985	no	ABIL4	miR5014a-5p:ABIL4	0.999065
AT5G51010.1	miR413	526	6	3.15684	0.480145	no	NA	miR413:AT5G51010.1	0.999065

## Sheet: SRX283759
Target transcript	miRNA	miRNA slice site position in target transcript	Allen score of sRNA:target duplex	Slice site RPM	Slice site RPM + 1/Maximum adjacent site RPM + 1	Previously verified by 5' RACE?	Target gene common name	Interaction name	P-value adjusted for multiple testing
AT1G12820.1	miR393a-5p	1894	4	274.222	21.2	yes	AFB3	miR393a-5p:AFB3	0
AT1G27360.4	miR156j	1309	0	4.1082	4.3616	no	SPL11	miR156j:SPL11	0
AT1G27370.4	miR156j	1324	0	0.684699	1.6847	no	SPL10	miR156j:SPL10	0
AT1G30490.1	miR165a-3p	805	3	23.6221	15.3974	yes	ATHB9	miR165a-3p:ATHB9	0
AT1G31280.1	miR403-3p	3232	1	2.39645	3.39645	yes	AGO2	miR403-3p:AGO2	0
AT1G48410.3	miR168a-5p	531	5	26.8745	23.8005	yes	AGO1	miR168a-5p:AGO1	0
AT1G53230.1	miR319c	1194	3.5	3.25232	3.63082	yes	TCP3	miR319c:TCP3	0
AT1G62720.1	miR400	995	1	0.684699	1.6847	no	AtNG1	miR400:AtNG1	0
AT1G69170.1	miR156j	1306	0	0.684699	1.6847	yes	SPL6	miR156j:SPL6	0
AT1G72830.3	miR169h	1423	2.5	3.08115	3.48466	yes	ATHAP2C	miR169h:ATHAP2C	0
AT1G77850.1	miR160a-5p	1419	0.5	1.71175	2.31541	yes	ARF17	miR160a-5p:ARF17	0
AT2G02850.1	miR408-3p	107	1	0.171175	0.872481	yes	ARPN	miR408-3p:ARPN	0
AT2G27400.1	miR173-5p	378	2.5	6.50464	7.50464	yes	TAS1a	miR173-5p:TAS1a	0
AT2G28350.1	miR160a-5p	1339	2	0.855874	1.58463	yes	ARF10	miR160a-5p:ARF10	0
AT2G29130.1	miR397a	739	1.5	0.855874	1.38256	yes	ATLAC2	miR397a:ATLAC2	0
AT2G31070.1	miR319c	1390	2.5	2.0541	2.60772	yes	TCP10	miR319c:TCP10	0
AT2G33770.1	miR399a	750	1.5	0.171175	1	yes	ATUBC24	miR399a:ATUBC24	0
AT2G33770.1	miR399e	896	1	0.171175	1.17118	yes	ATUBC24	miR399e:ATUBC24	0
AT2G33810.1	miR156a-5p	796	1.5	8.90109	5.87707	yes	SPL3	miR156a-5p:SPL3	0
AT2G34710.1	miR165a-3p	880	3	9.92814	9.33092	yes	ATHB-14	miR165a-3p:ATHB-14	0
AT2G39675.1	miR173-5p	378	2.5	10.4417	11.4417	yes	TAS1c	miR173-5p:TAS1c	0
AT2G42200.1	miR156j	946	0	0.34235	1	no	AtSPL9	miR156j:AtSPL9	0
AT2G45160.1	miR171a-3p	1013	0	44.8478	2.62997	yes	ATHAM1	miR171a-3p:ATHAM1	0
AT3G15030.3	miR319c	1310	3	11.2975	10.5001	yes	MEE35	miR319c:MEE35	0
AT3G17185.2	miR390a-5p	863	4.5	1.88292	2.46156	yes	TAS3a	miR390a-5p:TAS3a	0
AT3G25795.1	miR828	887	1	0.34235	1.34235	yes	TAS4	miR828:TAS4	0
AT3G26810.1	miR393a-5p	2009	4	7.87404	5.86316	yes	AFB2	miR393a-5p:AFB2	0
AT3G57230.2	miR824-5p	596	0.5	4.62172	4.80007	yes	AGL16	miR824-5p:AGL16	0
AT3G57920.1	miR156j	854	0	6.67582	5.07149	yes	SPL15	miR156j:SPL15	0
AT3G60630.1	miR171a-3p	1055	0	10.784	0.214566	yes	ATHAM2	miR171a-3p:ATHAM2	0
AT4G00150.1	miR171a-3p	866	0	1.71175	1.33778	yes	ATHAM3	miR171a-3p:ATHAM3	0
AT4G03190.1	miR393a-5p	1597	3	1.54057	2.16925	yes	AFB1	miR393a-5p:AFB1	0
AT4G24520.2	miR2937	884	6	2.90997	1.7787	no	AR1	miR2937:AR1	0
AT4G29520.1	miR414	779	1.5	0.171175	0.773806	no	NA	miR414:AT4G29520.1	0
AT4G32880.1	miR165a-3p	944	3	7.01817	8.01817	no	ATHB-8	miR165a-3p:ATHB-8	0
AT4G36920.2	miR172c	1303	1	5.99112	6.99112	yes	AP2	miR172c:AP2	0
AT5G39740.2	miR414	997	1.5	0.171175	1	no	OLI7	miR414:OLI7	0
AT5G43270.3	miR156j	1111	0	3.25232	2.52408	yes	SPL2	miR156j:SPL2	0
AT5G50570.2	miR156j	976	0	0.0855874	1.08559	no	SPL13	miR156j:SPL13	0
AT5G50670.1	miR156j	1111	0	0.0855874	1.08559	no	SPL13	miR156j:SPL13	0
AT5G60120.2	miR172a	1820	1	89.8668	60.0365	yes	TOE2	miR172a:TOE2	0
AT5G60690.1	miR165a-3p	1272	3	1.54057	2.34027	yes	IFL	miR165a-3p:IFL	0
AT5G61430.1	miR164a	850	2.5	5.99112	5.20812	yes	ANAC100	miR164a:ANAC100	0
AT1G27340.1	miR394a	1382	1	0.855874	1.58463	yes	LCR	miR394a:LCR	0.000416223
AT2G22740.2	miR778	1185	1.5	2.90997	2.10681	yes	SDG23	miR778:SDG23	0.000541695
AT4G30080.1	miR160a-5p	1518	2.5	0.855874	1.85587	yes	ARF16	miR160a-5p:ARF16	0.000562742
AT1G30210.2	miR319a	1022	2.5	1.54057	2.16925	yes	ATTCP24	miR319a:ATTCP24	0.000894931
AT1G56010.2	miR164a	812	2	0.855874	1.58463	yes	anac021	miR164a:anac021	0.00118342
AT5G07680.2	miR164a	661	2.5	0.855874	1.58463	yes	ANAC079	miR164a:ANAC079	0.00118342
AT5G53950.1	miR164a	811	2.5	1.3694	2.3694	yes	ANAC098	miR164a:ANAC098	0.00118342
AT4G18390.2	miR319a	1136	2.5	0.513525	1.51353	yes	TCP2	miR319a:TCP2	0.00156495
AT1G62670.1	miR161.1	978	2.5	2.0541	2.60772	no	RPF2	miR161.1:RPF2	0.00218749
AT2G47460.1	miR858b	400	2.5	1.02705	1.73078	yes	ATMYB12	miR858b:ATMYB12	0.00218749
AT5G49330.1	miR858a	385	3	4.96407	5.09238	yes	ATMYB111	miR858a:ATMYB111	0.00218749
AT3G15270.1	miR156i	654	2	1.71175	1.79168	yes	SPL5	miR156i:SPL5	0.00240894
AT5G67180.1	miR172a	1308	3	2.90997	3.90997	yes	TOE3	miR172a:TOE3	0.00298079
AT1G62590.1	miR161.2	1049	1	0.34235	1.34235	no	NA	miR161.2:AT1G62590.1	0.0031884
AT1G63330.1	miR161.2	774	1	0.34235	1.34235	no	NA	miR161.2:AT1G63330.1	0.0031884
AT2G39681.1	miR173-5p	417	2.5	2.56762	3.04619	yes	TAS2	miR173-5p:TAS2	0.00337086
AT3G62980.1	miR393a-5p	1721	2	0.684699	1.43847	yes	AtTIR1	miR393a-5p:AtTIR1	0.00370062
AT5G20670.1	miR8175	466	2.5	0.171175	1.17118	no	NA	miR8175:AT5G20670.1	0.00377576
AT4G08870.2	miR2938	778	2.5	3.93702	1.32048	no	ARGAH2	miR2938:ARGAH2	0.00478425
AT5G06100.3	miR159a	1259	3.5	1.88292	2.46156	yes	ATMYB33	miR159a:ATMYB33	0.00478425
AT5G63020.1	miR472-3p	552	2.5	0.34235	1.14616	no	NA	miR472-3p:AT5G63020.1	0.00703183
AT3G05690.1	miR169d	1194	3	0.171175	1.17118	yes	ATHAP2B	miR169d:ATHAP2B	0.00731312
AT3G52910.1	miR396a-5p	752	4	8.55874	6.31555	yes	AtGRF4	miR396a-5p:AtGRF4	0.00731312
AT4G24150.1	miR396a-5p	847	4	8.90109	8.45398	yes	AtGRF8	miR396a-5p:AtGRF8	0.00731312
AT5G39610.1	miR164c-5p	780	3	0.855874	1.85587	no	ANAC092	miR164c-5p:ANAC092	0.00743764
AT3G11440.1	miR159a	1165	3.5	1.71175	2.02015	yes	ATMYB65	miR159a:ATMYB65	0.00826718
AT2G28550.3	miR172a	1612	3	0.513525	1.51353	no	RAP2.7	miR172a:RAP2.7	0.00857176
AT3G25910.1	miR414	1319	2.5	0.513525	1	no	NA	miR414:AT3G25910.1	0.0120395
AT4G10380.1	miR5021	34	1.5	0.171175	1.17118	no	AtNIP5;1	miR5021:AtNIP5;1	0.0120921
AT3G22470.1	miR400	1231	2	0.171175	1	no	NA	miR400:AT3G22470.1	0.0121088
AT4G30600.1	miR5658	2024	2	0.513525	1.29231	no	NA	miR5658:AT4G30600.1	0.0124687
AT1G77405.1	miR400	965	3	0.34235	1.34235	no	NA	miR400:AT1G77405.1	0.013953
AT1G66230.1	miR858a	468	3	0.171175	1.17118	yes	AtMYB20	miR858a:AtMYB20	0.0161188
AT4G12350.1	miR858a	300	3	0.171175	1.17118	no	AtMYB42	miR858a:AtMYB42	0.0161188
AT4G37740.1	miR396a-5p	920	4	3.59467	3.92313	yes	AtGRF2	miR396a-5p:AtGRF2	0.0167211
AT1G63150.1	miR161.2	996	2.5	0.684699	1.25504	yes	NA	miR161.2:AT1G63150.1	0.0184025
AT4G13330.1	miR5663-3p	932	2.5	0.171175	1	no	NA	miR5663-3p:AT4G13330.1	0.0184025
AT3G15640.2	miR398a-3p	105	3	0.34235	1.14616	yes	NA	miR398a-3p:AT3G15640.2	0.0204493
AT5G23420.2	miR414	390	2	0.684699	0.711023	no	HMGB6	miR414:HMGB6	0.0204557
AT2G16920.1	miR414	273	2.5	0.684699	1.1131	no	PFU2	miR414:PFU2	0.0211033
AT3G46540.1	miR844-3p	474	2	0.171175	1	no	NA	miR844-3p:AT3G46540.1	0.0211033
AT1G47970.1	miR414	401	2	4.7929	0.828608	no	NA	miR414:AT1G47970.1	0.0215664
AT3G58110.2	miR414	1000	2.5	1.02705	1	no	NA	miR414:AT3G58110.2	0.0215664
AT3G47010.2	miR160a-3p	1457	3.5	0.171175	1.17118	no	NA	miR160a-3p:AT3G47010.2	0.022682
AT5G05100.1	miR854a	830	1	0.171175	0.577773	no	NA	miR854a:AT5G05100.1	0.0243021
AT3G11100.1	miR414	512	2	0.34235	0.610653	no	NA	miR414:AT3G11100.1	0.0250169
AT5G19900.1	miR414	790	2	0.171175	0.577773	no	NA	miR414:AT5G19900.1	0.0253062
AT3G23690.1	miR393a-5p	416	3	0.171175	1.17118	yes	NA	miR393a-5p:AT3G23690.1	0.0269413
AT1G06580.1	miR161.1	874	3.5	0.34235	1.34235	yes	PPR1	miR161.1:PPR1	0.0278496
AT1G17590.4	miR169h	1515	2.5	0.34235	1.14616	yes	NF-YA8	miR169h:NF-YA8	0.0281591
AT1G60140.1	miR396b-5p	2296	3.5	1.19822	1.45238	no	ATTPS10	miR396b-5p:ATTPS10	0.0290822
AT1G30330.2	miR167c-5p	3245	3	0.171175	1.17118	no	ARF6	miR167c-5p:ARF6	0.0298968
AT2G22840.1	miR396a-5p	791	4	1.19822	1.87694	yes	AtGRF1	miR396a-5p:AtGRF1	0.0302738
AT5G08620.1	miR157a-5p	1434	2.5	0.171175	1	no	ATRH25	miR157a-5p:ATRH25	0.0302738
AT5G57735.1	miR390a-5p	428	4.5	1.02705	1.73078	yes	TAS3c	miR390a-5p:TAS3c	0.0305622
AT1G10120.1	miR396a-5p	1316	5.5	5.13525	5.23854	yes	NA	miR396a-5p:AT1G10120.1	0.0316219
AT4G33495.1	miR414	1344	2.5	0.171175	0.872481	no	RPD1	miR414:RPD1	0.0327645
AT2G36400.1	miR396a-5p	756	4	1.02705	2.02705	yes	AtGRF3	miR396a-5p:AtGRF3	0.0328373
AT5G49850.1	miR846-3p	798	3	0.171175	1.17118	yes	NA	miR846-3p:AT5G49850.1	0.0328373
AT1G53230.1	miR5658	1252	3	0.171175	1.17118	no	TCP3	miR5658:TCP3	0.0328455
AT2G33810.1	miR5021	287	4	1.88292	1.5534	no	SPL3	miR5021:SPL3	0.0338288
AT5G06510.3	miR169d	1239	3	0.171175	1.17118	yes	NF-YA10	miR169d:NF-YA10	0.0347125
AT4G32710.1	miR158a-5p	778	5	3.4235	3.29534	no	PERK14	miR158a-5p:PERK14	0.0371196
AT5G37370.4	miR5998a	1363	2.5	0.171175	1	no	ATSRL1	miR5998a:ATSRL1	0.0371196
AT3G14560.1	miR824-5p	294	4.5	3.93702	2.93051	no	NA	miR824-5p:AT3G14560.1	0.0394138
AT1G69770.1	miR823	2036	2.5	0.34235	1.14616	yes	CMT3	miR823:CMT3	0.0445827
AT2G30350.2	miR414	635	2.5	0.171175	0.872481	no	NA	miR414:AT2G30350.2	0.0445827
AT4G31610.1	miR414	595	2.5	0.171175	0.872481	no	ATREM1	miR414:ATREM1	0.0445827
AT5G12840.4	miR169b-5p	1129	3	0.171175	1.17118	yes	ATHAP2A	miR169b-5p:ATHAP2A	0.0445827
AT1G50055.1	miR173-5p	373	4.5	2.22527	3.22527	yes	TAS1b	miR173-5p:TAS1b	0.0455957
AT1G70320.1	miR414	6532	3.5	1.19822	1.18447	no	UPL2	miR414:UPL2	0.047396
AT3G07820.1	miR833a-5p	992	6	3.76585	3.55038	no	NA	miR833a-5p:AT3G07820.1	0.047396
AT1G62680.1	miR5658	1933	2	0.171175	1	no	NA	miR5658:AT1G62680.1	0.0479445
AT5G01370.1	miR396b-5p	635	3	0.171175	1	no	ACI1	miR396b-5p:ACI1	0.0479445
AT5G09670.2	miR394a	987	3	0.34235	1	no	NA	miR394a:AT5G09670.2	0.0479445
AT5G09672.1	miR394a	987	3	0.34235	1	no	CPuORF21	miR394a:CPuORF21	0.0479445
AT5G40340.1	miR414	1045	2.5	0.171175	0.773806	no	NA	miR414:AT5G40340.1	0.0479445
AT1G69935.1	miR414	306	3	0.171175	1	no	SHW1	miR414:SHW1	0.0484804
AT2G28240.1	miR8180	1194	3	0.171175	1	no	NA	miR8180:AT2G28240.1	0.0484804
AT1G75430.1	miR838	388	4	0.171175	1.17118	no	BLH11	miR838:BLH11	0.0590957
AT5G37780.3	miR414	638	2.5	0.171175	0.695184	no	ACAM-1	miR414:ACAM-1	0.0590957
AT5G63950.1	miR414	1607	2.5	0.171175	0.695184	no	CHR24	miR414:CHR24	0.0590957
AT1G62910.1	miR400	1208	3	0.171175	1	no	RFL9	miR400:RFL9	0.0613982
AT5G35550.1	miR858b	369	4	0.171175	1.17118	no	ATMYB123	miR858b:ATMYB123	0.0613982
AT1G63980.2	miR414	898	2.5	0.0102705	0.667495	no	NA	miR414:AT1G63980.2	0.063859
AT3G07870.1	miR5021	24	3	0.171175	1.17118	no	NA	miR5021:AT3G07870.1	0.0741966
AT1G64880.1	miR414	933	2.5	0.171175	0.695184	no	NA	miR414:AT1G64880.1	0.0746224
AT2G39810.1	miR2937	1582	4	0.171175	1.17118	no	ESD6	miR2937:ESD6	0.0756932
AT2G47940.2	miR1886.1	47	4	0.34235	1.34235	no	DEG2	miR1886.1:DEG2	0.0756932
AT5G65640.2	miR5658	195	2	0.171175	1	no	bHLH093	miR5658:bHLH093	0.0761718
AT5G55920.1	miR414	1841	2.5	0.34235	0.662218	no	OLI2	miR414:OLI2	0.0784729
AT2G29620.1	miR414	583	4	0.171175	1.17118	no	NA	miR414:AT2G29620.1	0.0796139
AT1G47970.1	miR414	371	2.5	5.13525	0.478901	no	NA	miR414:AT1G47970.1	0.0805597
AT2G45480.1	miR396a-5p	524	4	0.171175	1.17118	yes	AtGRF9	miR396a-5p:AtGRF9	0.0805597
AT5G16640.1	miR161.1	823	3.5	0.171175	1	no	NA	miR161.1:AT5G16640.1	0.0805597
AT2G11910.2	miR414	502	3	1.19822	1	no	NA	miR414:AT2G11910.2	0.0840336
AT4G04630.1	miR5658	786	4	0.171175	1.17118	no	NA	miR5658:AT4G04630.1	0.0873851
AT3G23900.3	miR5021	11	2	0.171175	1	no	NA	miR5021:AT3G23900.3	0.0947991
AT5G63580.1	miR5632-5p	767	3.5	0.171175	1	no	ATFLS2	miR5632-5p:ATFLS2	0.09609
AT1G31485.1	miR166a-5p	284	5	0.34235	1.34235	no	NA	miR166a-5p:AT1G31485.1	0.0988531
AT1G63130.1	miR161.1	1102	2.5	0.34235	0.886903	yes	TAS8	miR161.1:TAS8	0.102201
AT4G22190.1	miR156i	180	3.5	0.171175	1.17118	no	NA	miR156i:AT4G22190.1	0.105499
AT5G51620.3	miR5021	46	3.5	0.171175	1.17118	no	NA	miR5021:AT5G51620.3	0.105925
AT1G16720.1	miR868-3p	1851	4	0.171175	1.17118	no	HCF173	miR868-3p:HCF173	0.109624
AT3G58780.3	miR159b-5p	803	3	0.171175	0.872481	no	AGL1	miR159b-5p:AGL1	0.111243
AT2G25760.2	miR8170-5p	2275	3	0.171175	1	no	NA	miR8170-5p:AT2G25760.2	0.123742
AT2G43360.1	miR5021	72	3	0.171175	1.17118	no	BIO2	miR5021:BIO2	0.123742
AT4G30190.2	miR773b-3p	1307	3.5	0.513525	1.12752	no	AHA2	miR773b-3p:AHA2	0.123742
AT5G66005.3	miR5664	63	5	0.513525	1.51353	no	NA	miR5664:AT5G66005.3	0.123742
AT4G30760.2	miR5634	12	2	0.171175	0.202174	no	NA	miR5634:AT4G30760.2	0.128267
AT1G01160.2	miR837-5p	431	3.5	0.171175	1	no	GIF2	miR837-5p:GIF2	0.139743
AT1G69070.1	miR414	1237	3.5	0.171175	1	no	NA	miR414:AT1G69070.1	0.141433
AT5G18520.1	miR414	1334	3.5	0.34235	1	no	Cand7	miR414:Cand7	0.141433
AT5G66540.1	miR414	775	3.5	0.171175	1	no	NA	miR414:AT5G66540.1	0.141433
AT5G42360.1	miR396a-5p	1645	3.5	0.474154	1.00702	no	NA	miR396a-5p:AT5G42360.1	0.147537
AT5G53660.1	miR396a-5p	539	4	0.34235	1.14616	yes	AtGRF7	miR396a-5p:AtGRF7	0.148523
AT3G51290.2	miR156j	1137	5	0.171175	1.17118	no	NA	miR156j:AT3G51290.2	0.148886
AT3G62610.1	miR858b	299	4.5	0.171175	1.17118	no	ATMYB11	miR858b:ATMYB11	0.156842
AT3G14810.2	miR858a	838	4.5	0.171175	1.17118	no	MSL5	miR858a:MSL5	0.159599
AT3G17850.1	miR2936	2255	5	0.171175	1.17118	no	NA	miR2936:AT3G17850.1	0.165899
AT1G33060.2	miR5658	1822	3.5	0.171175	1	no	ANAC014	miR5658:ANAC014	0.167811
AT1G76900.2	miR774b-5p	642	3.5	0.171175	1	no	AtTLP1	miR774b-5p:AtTLP1	0.168673
AT2G24230.1	miR5012	1984	4	0.171175	1	no	NA	miR5012:AT2G24230.1	0.171246
AT3G01780.1	miR399c-5p	1363	4.5	0.171175	1.17118	no	TPLATE	miR399c-5p:TPLATE	0.172141
AT1G25430.1	miR172d-5p	1600	5	0.171175	1.17118	no	NA	miR172d-5p:AT1G25430.1	0.173648
AT5G62320.1	miR5021	30	3.5	0.171175	1.17118	no	ATMYB99	miR5021:ATMYB99	0.176095
AT1G32160.1	miR5021	121	5	0.34235	1.34235	no	NA	miR5021:AT1G32160.1	0.178346
AT4G08900.1	miR2938	890	3.5	1.54057	0.936875	no	ARGAH1	miR2938:ARGAH1	0.178574
AT2G46900.1	miR414	265	4.5	0.171175	1.17118	no	NA	miR414:AT2G46900.1	0.184627
AT3G16560.1	miR173-3p	1175	5	0.171175	1.17118	no	NA	miR173-3p:AT3G16560.1	0.186752
AT1G52827.1	miR1887	256	3.5	0.171175	1	no	ATCDT1	miR1887:ATCDT1	0.193974
AT4G28660.2	miR157d	158	5	0.513525	1.29231	no	PSB28	miR157d:PSB28	0.193974
AT1G62910.1	miR161.2	996	3	0.599112	0.903307	yes	RFL9	miR161.2:RFL9	0.195562
AT1G62930.1	miR161.2	984	3	0.599112	0.903307	no	RPF3	miR161.2:RPF3	0.195562
AT1G63400.1	miR161.1	990	2.5	0.171175	0.695184	yes	NA	miR161.1:AT1G63400.1	0.198517
AT3G14810.2	miR847	1055	6	0.855874	1.38256	no	MSL5	miR847:MSL5	0.199589
AT3G24760.1	miR414	906	3	0.171175	0.773806	no	NA	miR414:AT3G24760.1	0.199589
AT1G63400.1	miR161.2	999	2	0.684699	0.766392	yes	NA	miR161.2:AT1G63400.1	0.200102
AT3G15120.1	miR4227	5760	4	0.171175	1	no	NA	miR4227:AT3G15120.1	0.205636
AT1G62910.1	miR161.1	987	2.5	0.0855874	0.678869	yes	RFL9	miR161.1:RFL9	0.207289
AT1G62930.1	miR161.1	975	2.5	0.0855874	0.678869	no	RPF3	miR161.1:RPF3	0.207289
AT2G34090.3	miR4228-5p	454	5.5	0.171175	1.17118	no	MEE18	miR4228-5p:MEE18	0.20751
AT1G27900.1	miR5661	442	4	0.171175	1	no	NA	miR5661:AT1G27900.1	0.209938
AT2G40820.1	miR414	269	3.5	0.171175	0.872481	no	NA	miR414:AT2G40820.1	0.211909
AT3G25520.2	miR414	699	3.5	0.171175	0.872481	no	ATL5	miR414:ATL5	0.211909
AT5G44200.2	miR414	905	3.5	0.171175	0.872481	no	ATCBP20	miR414:ATCBP20	0.211909
AT5G48330.2	miR171a-3p	929	5.5	0.34235	1.34235	no	RUG2	miR171a-3p:RUG2	0.212961
AT3G24740.2	miR170-5p	1598	5	0.171175	1.17118	no	NA	miR170-5p:AT3G24740.2	0.219432
AT5G22080.2	miR847	594	4.5	2.90997	1.04578	no	NA	miR847:AT5G22080.2	0.22292
AT2G34900.2	miR865-3p	639	3	0.171175	0.695184	no	GTE01	miR865-3p:GTE01	0.224075
AT2G44130.1	miR414	1246	3	0.171175	0.695184	no	NA	miR414:AT2G44130.1	0.235035
AT2G39810.1	miR5023	2270	5	0.171175	1.17118	no	ESD6	miR5023:ESD6	0.235314
AT1G21160.1	miR844-5p	3140	6	1.19822	1.63759	no	NA	miR844-5p:AT1G21160.1	0.237031
AT3G06400.3	miR838	2587	3	0.171175	0.631064	no	CHR11	miR838:CHR11	0.237031
AT4G12610.2	miR414	898	3	0.34235	0.796789	no	ATRAP74	miR414:ATRAP74	0.241888
AT1G66350.1	miR5021	39	6	0.34235	1.34235	no	RGL	miR5021:RGL	0.249017
AT3G47500.1	miR4239	213	4.5	0.34235	1	no	CDF3	miR4239:CDF3	0.25015
AT2G22850.2	miR5021	70	4	0.171175	1.17118	no	AtbZIP6	miR5021:AtbZIP6	0.250175
AT3G01500.3	miR5658	1175	2	0.171175	0.363125	no	ATBCA1	miR5658:ATBCA1	0.250175
AT3G17980.1	miR5640	761	5	0.855874	1.22619	no	AtC2	miR5640:AtC2	0.250175
AT3G62770.3	miR5021	78	4	0.171175	1.17118	no	AtATG18a	miR5021:AtATG18a	0.250175
AT5G14320.2	miR5021	78	4	0.171175	1.17118	no	EMB3137	miR5021:EMB3137	0.250175
AT5G20350.1	miR5021	18	4	0.171175	1.17118	no	TIP1	miR5021:TIP1	0.250175
AT5G43130.2	miR838	1767	4	0.34235	1	no	TAF4	miR838:TAF4	0.250175
AT5G49215.2	miR833a-3p	675	5	0.171175	1.17118	no	NA	miR833a-3p:AT5G49215.2	0.250175
AT5G52840.1	miR838	281	5.5	0.513525	1.29231	no	NA	miR838:AT5G52840.1	0.250175
AT1G68910.3	miR403-5p	1315	4	0.171175	1	no	WIT2	miR403-5p:WIT2	0.251724
AT4G05160.1	miR5021	14	5	0.171175	1.17118	no	NA	miR5021:AT4G05160.1	0.25343
AT4G38600.2	miR5021	5771	5	0.171175	1.17118	no	KAK	miR5021:KAK	0.25343
AT5G43060.1	miR396b-5p	518	3	2.22527	0.591733	no	RD21B	miR396b-5p:RD21B	0.257077
AT1G06950.1	miR414	2122	3	0.171175	0.631064	no	ATTIC110	miR414:ATTIC110	0.257769
AT1G31730.1	miR5658	3131	3	0.171175	0.872481	no	NA	miR5658:AT1G31730.1	0.257769
AT1G55110.1	miR5658	818	3	0.171175	0.872481	no	AtIDD7	miR5658:AtIDD7	0.257769
AT4G36890.1	miR844-3p	634	3.5	0.171175	0.872481	no	IRX14	miR844-3p:IRX14	0.259228
AT3G13200.1	miR414	505	3	1.54057	0.622513	no	EMB2769	miR414:EMB2769	0.266329
AT2G17510.2	miR861-3p	1689	5	0.171175	1.17118	no	EMB2763	miR861-3p:EMB2763	0.268195
AT2G48070.3	miR854a	195	3	0.171175	0.872481	no	RPH1	miR854a:RPH1	0.268195
AT3G50690.1	miR414	508	3	0.513525	0.688523	no	NA	miR414:AT3G50690.1	0.268195
AT5G20190.1	miR414	448	3.5	0.171175	0.872481	no	NA	miR414:AT5G20190.1	0.268195
AT5G42350.1	miR396a-5p	1642	3.5	0.0393702	0.990215	no	NA	miR396a-5p:AT5G42350.1	0.268195
AT5G56950.1	miR414	1124	4	0.513525	1	no	NAP1;3	miR414:NAP1;3	0.268195
AT5G60980.2	miR829-5p	1306	5	0.171175	1.17118	no	NA	miR829-5p:AT5G60980.2	0.268195
AT3G02830.1	miR5658	240	4	0.171175	1	no	PNT1	miR5658:PNT1	0.269837
AT2G27500.3	miR773b-5p	753	4	0.171175	1	no	NA	miR773b-5p:AT2G27500.3	0.274461
AT5G55960.1	miR5021	265	5.5	0.171175	1.17118	no	NA	miR5021:AT5G55960.1	0.274461
AT5G56380.1	miR5021	17	5.5	0.171175	1.17118	no	NA	miR5021:AT5G56380.1	0.274461
AT2G39020.1	miR8181	26	4	0.171175	1	no	NA	miR8181:AT2G39020.1	0.278598
AT3G47860.1	miR414	416	4.5	0.34235	1	no	CHL	miR414:CHL	0.281163
AT4G27120.2	miR414	350	3	0.513525	0.524997	no	NA	miR414:AT4G27120.2	0.284918
AT5G18800.2	miR5656	140	4.5	0.171175	1	no	NA	miR5656:AT5G18800.2	0.284918
AT2G05170.1	miR397a	2740	4	0.171175	1	no	ATVPS11	miR397a:ATVPS11	0.287145
AT1G70570.2	miR5663-3p	1224	4.5	0.34235	1.14616	no	NA	miR5663-3p:AT1G70570.2	0.288151
AT3G07780.1	miR773a	1504	3.5	0.34235	0.796789	no	OBE1	miR773a:OBE1	0.288151
AT4G24470.3	miR865-3p	679	6	0.171175	1.17118	no	GATA25	miR865-3p:GATA25	0.288151
AT4G04570.2	miR5661	749	5.5	0.171175	1.17118	no	CRK40	miR5661:CRK40	0.288228
AT5G19090.3	miR414	885	3.5	0.171175	0.773806	no	NA	miR414:AT5G19090.3	0.288228
AT5G37020.2	miR167c-5p	2379	3.5	0.171175	0.872481	yes	ARF8	miR167c-5p:ARF8	0.294365
AT2G41060.2	miR414	244	5	0.34235	1.14616	no	NA	miR414:AT2G41060.2	0.297076
AT5G27750.1	miR5996	645	5.5	0.171175	1.17118	no	NA	miR5996:AT5G27750.1	0.297076
AT2G11910.2	miR414	313	3	3.25232	0.498415	no	NA	miR414:AT2G11910.2	0.300145
AT2G35150.1	miR3440b-5p	838	5.5	0.171175	1.17118	no	EXL7	miR3440b-5p:EXL7	0.300145
AT3G33067.1	miR398b-3p	1644	6	0.171175	1.17118	no	NA	miR398b-3p:AT3G33067.1	0.307819
AT1G22070.1	miR8170-3p	1275	5	0.34235	1.14616	no	TGA3	miR8170-3p:TGA3	0.317045
AT3G51895.1	miR865-5p	1923	3.5	0.171175	0.872481	no	AST12	miR865-5p:AST12	0.321562
AT3G24840.1	miR5021	15	6	0.171175	1.17118	no	NA	miR5021:AT3G24840.1	0.323234
AT4G21610.1	miR847	149	3.5	0.34235	0.723298	no	LOL2	miR847:LOL2	0.323655
AT2G41540.3	miR866-3p	656	4	0.34235	1	no	GPDHC1	miR866-3p:GPDHC1	0.33106
AT3G05220.2	miR414	638	3	0.171175	0.313249	no	NA	miR414:AT3G05220.2	0.33106
AT3G20770.1	miR5015	1976	3.5	0.171175	0.695184	no	AtEIN3	miR5015:AtEIN3	0.332196
AT1G50450.1	miR4221	1316	6	0.855874	1.22619	no	NA	miR4221:AT1G50450.1	0.339341
AT5G39660.2	miR414	342	3.5	0.34235	0.723298	no	CDF2	miR414:CDF2	0.339341
AT5G57960.1	miR396b-5p	195	5.5	1.02705	1.20321	no	NA	miR396b-5p:AT5G57960.1	0.339575
AT3G21220.1	miR854a	298	6	0.171175	1.17118	no	ATMAP2K_ALPHA	miR854a:ATMAP2K_ALPHA	0.340128
AT1G66490.1	miR859	623	6	0.171175	1.17118	no	NA	miR859:AT1G66490.1	0.340984
AT2G19660.1	miR5025	100	6	0.171175	1.17118	no	NA	miR5025:AT2G19660.1	0.340984
AT2G43850.2	miR5014a-3p	1687	5	0.34235	1.14616	no	NA	miR5014a-3p:AT2G43850.2	0.340984
AT3G54760.2	miR414	424	3.5	0.171175	0.695184	no	NA	miR414:AT3G54760.2	0.340984
AT4G36980.4	miR414	639	3	0.34235	0.0946617	no	NA	miR414:AT4G36980.4	0.340984
AT5G63520.1	miR157a-3p	439	5	0.171175	1	no	NA	miR157a-3p:AT5G63520.1	0.346041
AT1G67230.1	miR837-5p	1211	3.5	0.171175	0.695184	no	CRWN1	miR837-5p:CRWN1	0.346899
AT3G01120.1	miR847	722	4.5	0.684699	1	no	AtCGS1	miR847:AtCGS1	0.349672
AT3G61250.1	miR858b	603	5	0.171175	1	no	AtMYB17	miR858b:AtMYB17	0.35186
AT5G20110.1	miR838	241	4	0.171175	0.872481	no	NA	miR838:AT5G20110.1	0.35186
AT1G63130.1	miR161.2	1111	3	0.513525	0.495572	yes	TAS8	miR161.2:TAS8	0.356186
AT1G80930.1	miR414	860	4	0.855874	0.915554	no	NA	miR414:AT1G80930.1	0.356186
AT2G06000.2	miR773a	1738	5	0.171175	1	no	NA	miR773a:AT2G06000.2	0.356186
AT2G23350.1	miR156f-3p	1923	4	0.171175	0.872481	no	PAB4	miR156f-3p:PAB4	0.356186
AT2G43560.1	miR773a	631	5	0.34235	1	no	NA	miR773a:AT2G43560.1	0.356186
AT1G15280.2	miR414	188	3.5	1.02705	0.663714	no	NA	miR414:AT1G15280.2	0.358903
AT3G21060.1	miR414	2009	3.5	1.19822	0.681562	no	RBL	miR414:RBL	0.358903
AT1G60860.1	miR5021	2702	5	0.171175	1.17118	no	AGD2	miR5021:AGD2	0.364792
AT5G62730.1	miR5633	65	4	0.34235	1	no	NA	miR5633:AT5G62730.1	0.364816
AT1G13220.2	miR414	3310	3.5	0.171175	0.631064	no	CRWN2	miR414:CRWN2	0.368202
AT1G50830.1	miR779.1	2105	5	0.171175	1	no	NA	miR779.1:AT1G50830.1	0.368202
AT3G51120.1	miR5650	2219	5	0.171175	1	no	NA	miR5650:AT3G51120.1	0.368202
AT3G56110.2	miR854a	472	3.5	0.171175	0.872481	no	PRA1.B1	miR854a:PRA1.B1	0.368202
AT1G23090.1	miR826a	1051	4	0.171175	0.872481	no	AST91	miR826a:AST91	0.368916
AT2G25760.2	miR773a	2002	4.5	0.34235	1	no	NA	miR773a:AT2G25760.2	0.370581
AT5G10960.1	miR5654-5p	926	3	0.171175	0.695184	no	NA	miR5654-5p:AT5G10960.1	0.370581
AT1G26790.1	miR447c-3p	1111	5	0.171175	1	no	NA	miR447c-3p:AT1G26790.1	0.371824
AT5G59390.1	miR824-3p	346	5	0.171175	1	no	NA	miR824-3p:AT5G59390.1	0.371824
AT2G17390.1	miR167d	363	4.5	0.171175	1	no	AKR2B	miR167d:AKR2B	0.372854
AT4G25640.2	miR843	1053	4.5	0.171175	1	no	ATDTX35	miR843:ATDTX35	0.373825
AT3G50690.1	miR414	652	3.5	0.684699	0.621259	no	NA	miR414:AT3G50690.1	0.376167
AT5G49100.1	miR5658	1219	4	0.171175	1	no	NA	miR5658:AT5G49100.1	0.376878
AT1G30610.2	miR414	479	5.5	0.34235	1.14616	no	EMB2279	miR414:EMB2279	0.377817
AT1G56423.1	miR5638a	662	5.5	0.513525	1.12752	no	NA	miR5638a:AT1G56423.1	0.377817
AT2G24830.1	miR414	800	5	0.171175	1	no	NA	miR414:AT2G24830.1	0.377817
AT3G54140.1	miR414	1668	5	0.171175	1	no	ATPTR1	miR414:ATPTR1	0.377817
AT4G00340.1	miR414	1183	5	0.171175	1	no	RLK4	miR414:RLK4	0.377817
AT5G40450.1	miR414	8596	5	0.171175	1	no	NA	miR414:AT5G40450.1	0.377817
AT1G29400.2	miR5021	130	5.5	0.171175	1.17118	no	AML5	miR5021:AML5	0.384434
AT1G54740.1	miR5658	885	3.5	0.34235	0.886903	no	NA	miR5658:AT1G54740.1	0.384434
AT1G61140.3	miR830-5p	4030	4	0.513525	0.898395	no	EDA16	miR830-5p:EDA16	0.384434
AT1G73960.2	miR5638a	217	4.5	0.171175	1	no	TAF2	miR5638a:TAF2	0.384434
AT3G47990.1	miR833a-3p	439	6	0.171175	1.17118	no	SIS3	miR833a-3p:SIS3	0.384434
AT4G00450.1	miR5633	6797	3	0.34235	0.662218	no	CCT	miR5633:CCT	0.384434
AT5G07180.1	miR390a-5p	2710	4.5	0.513525	1.12752	no	ERL2	miR390a-5p:ERL2	0.384434
AT5G09460.1	miR838	2121	3.5	0.34235	0.723298	no	NA	miR838:AT5G09460.1	0.384434
AT5G09461.1	miR838	2121	3.5	0.34235	0.723298	no	CPuORF43	miR838:CPuORF43	0.384434
AT5G09462.1	miR838	2121	3.5	0.34235	0.723298	no	CPuORF42	miR838:CPuORF42	0.384434
AT5G09463.1	miR838	2121	3.5	0.34235	0.723298	no	CPuORF41	miR838:CPuORF41	0.384434
AT5G19680.1	miR780.2	380	4.5	0.171175	1	no	NA	miR780.2:AT5G19680.1	0.384434
AT2G29700.1	miR831-3p	205	6	0.855874	1.22619	no	ATPH1	miR831-3p:ATPH1	0.392318
AT1G15670.1	miR414	1019	4.5	0.34235	1	no	NA	miR414:AT1G15670.1	0.392489
AT1G32870.2	miR414	625	4.5	0.171175	1	no	ANAC013	miR414:ANAC013	0.392489
AT1G78420.2	miR166e-5p	993	4	0.171175	0.872481	no	NA	miR166e-5p:AT1G78420.2	0.398101
AT1G59600.1	miR172b-5p	716	5	0.171175	1	no	ZCW7	miR172b-5p:ZCW7	0.40035
AT4G37510.1	miR2111a-5p	1033	5.5	0.34235	1.14616	no	NA	miR2111a-5p:AT4G37510.1	0.400946
AT1G60160.1	miR5633	1391	5.5	0.171175	1.17118	no	NA	miR5633:AT1G60160.1	0.402475
AT4G21430.1	miR831-3p	187	6	0.171175	1.17118	no	B160	miR831-3p:B160	0.402475
AT5G52280.1	miR869.2	829	4.5	0.34235	1	no	NA	miR869.2:AT5G52280.1	0.402475
AT4G17090.1	miR5998a	1652	6	0.855874	1.22619	no	AtBAM3	miR5998a:AtBAM3	0.406066
AT3G54190.1	miR841b-3p	755	4	0.171175	0.872481	no	NA	miR841b-3p:AT3G54190.1	0.41321
AT2G41530.1	miR5021	101	4	0.34235	1.14616	no	ATSFGH	miR5021:ATSFGH	0.414837
AT5G03320.1	miR172b-5p	1498	5.5	0.34235	1.14616	no	NA	miR172b-5p:AT5G03320.1	0.414837
AT4G36660.1	miR171a-3p	587	4.5	0.34235	1	no	NA	miR171a-3p:AT4G36660.1	0.415994
AT2G28150.1	miR773a	180	6	0.171175	1.17118	no	NA	miR773a:AT2G28150.1	0.418906
AT2G23980.1	miR776	2047	5.5	0.34235	1.14616	no	ATCNGC6	miR776:ATCNGC6	0.41894
AT2G25730.2	miR2111a-5p	7751	5	0.171175	1	no	NA	miR2111a-5p:AT2G25730.2	0.41894
AT3G46720.1	miR847	1157	5.5	0.171175	1	no	NA	miR847:AT3G46720.1	0.41894
AT3G50890.1	miR414	678	3.5	1.71175	0.468116	no	AtHB28	miR414:AtHB28	0.41894
AT5G38880.1	miR780.1	2678	5	0.171175	1	no	2018-08-05	miR780.1:AUG5	0.41894
AT5G40440.1	miR419	1362	5	0.171175	1	no	ATMKK3	miR419:ATMKK3	0.41894
AT5G54430.1	miR414	735	3.5	0.171175	0.460989	no	ATPHOS32	miR414:ATPHOS32	0.41894
AT1G73960.2	miR775	2718	4.5	0.171175	1	no	TAF2	miR775:TAF2	0.420086
AT1G07990.1	miR414	2351	3.5	0.34235	0.528366	no	NA	miR414:AT1G07990.1	0.421799
AT1G56510.1	miR5021	125	6	0.171175	1.17118	no	ADR2	miR5021:ADR2	0.421799
AT1G75460.1	miR5021	254	6	0.171175	1.17118	no	NA	miR5021:AT1G75460.1	0.421799
AT3G01560.1	miR5021	351	6	0.171175	1.17118	no	NA	miR5021:AT3G01560.1	0.421799
AT3G06180.1	miR840-3p	670	6	0.171175	1.17118	no	NA	miR840-3p:AT3G06180.1	0.421799
AT3G55420.1	miR854a	385	6	0.171175	1.17118	no	NA	miR854a:AT3G55420.1	0.421799
AT3G61070.3	miR862-3p	679	3.5	0.34235	0.359032	no	PEX11E	miR862-3p:PEX11E	0.421799
AT4G00800.1	miR5012	5776	6	0.171175	1.17118	no	SETH5	miR5012:SETH5	0.421799
AT4G32360.1	miR773a	1532	4	0.171175	0.872481	no	NA	miR773a:AT4G32360.1	0.421799
AT5G57280.1	miR5021	29	6	0.171175	1.17118	no	RID2	miR5021:RID2	0.421799
AT1G47970.1	miR414	233	3.5	2.39645	0.45258	no	NA	miR414:AT1G47970.1	0.424279
AT1G18800.1	miR414	830	3.5	0.171175	0.431889	no	NRP2	miR414:NRP2	0.424967
AT3G09840.1	miR861-3p	590	6	1.19822	1.18447	no	ATCDC48	miR861-3p:ATCDC48	0.426738
AT1G15860.3	miR829-5p	851	5	0.171175	1	no	NA	miR829-5p:AT1G15860.3	0.430789
AT3G12280.2	miR2112-5p	2420	6	0.171175	1.17118	no	ATRBR1	miR2112-5p:ATRBR1	0.435886
AT1G27460.1	miR2112-5p	270	5	0.171175	1	no	NPGR1	miR2112-5p:NPGR1	0.435921
AT1G21980.1	miR5999	1326	5	0.171175	1	no	ATPIP5K1	miR5999:ATPIP5K1	0.438363
AT2G32415.2	miR164b-3p	2554	6	0.171175	1.17118	no	NA	miR164b-3p:AT2G32415.2	0.439439
AT1G06590.1	miR842	1211	6	0.171175	1.17118	no	NA	miR842:AT1G06590.1	0.439852
AT1G10657.4	miR830-5p	370	6	0.34235	1.14616	no	NA	miR830-5p:AT1G10657.4	0.445115
AT1G27940.1	miR842	3150	5.5	0.171175	1	no	ABCB13	miR842:ABCB13	0.445115
AT1G32750.1	miR165a-3p	1808	6	0.171175	1	no	GTD1	miR165a-3p:GTD1	0.445115
AT1G52150.3	miR835-5p	2648	5.5	0.171175	1	no	ATHB-15	miR835-5p:ATHB-15	0.445115
AT1G52980.1	miR865-3p	567	5.5	0.171175	1	no	AtNug2	miR865-3p:AtNug2	0.445115
AT2G10410.1	miR846-5p	545	5.5	0.171175	1	no	SADHU1-1	miR846-5p:SADHU1-1	0.445115
AT2G23460.1	miR865-3p	805	5.5	0.171175	1	no	ATXLG1	miR865-3p:ATXLG1	0.445115
AT2G42490.1	miR5021	193	4	0.171175	1	no	NA	miR5021:AT2G42490.1	0.445115
AT2G42670.2	miR5021	239	4	0.171175	1	no	NA	miR5021:AT2G42670.2	0.445115
AT3G23810.1	miR172d-5p	976	3.5	0.34235	0.528366	no	ATSAHH2	miR172d-5p:ATSAHH2	0.445115
AT3G53110.1	miR5648-3p	1674	4	0.513525	0.898395	no	LOS4	miR5648-3p:LOS4	0.445115
AT4G08580.1	miR847	574	4.5	0.0445055	0.889245	no	NA	miR847:AT4G08580.1	0.445115
AT4G22720.2	miR8170-5p	601	5.5	0.34235	1.14616	no	NA	miR8170-5p:AT4G22720.2	0.445115
AT4G35783.1	miR5021	94	4	0.171175	1	no	DVL17	miR5021:DVL17	0.445115
AT5G09990.1	miR5021	152	4	0.171175	1	no	PROPEP5	miR5021:PROPEP5	0.445115
AT5G22830.1	miR5021	416	4	0.171175	1	no	ATMGT10	miR5021:ATMGT10	0.445115
AT5G65670.2	miR172b-5p	1057	3.5	3.93702	0.673217	no	IAA9	miR172b-5p:IAA9	0.445115
AT4G09730.1	miR399d	1928	3.5	0.34235	0.465622	no	RH39	miR399d:RH39	0.454131
AT1G20696.3	miR5021	727	2.5	0.171175	0.577773	no	HMGB3	miR5021:HMGB3	0.458988
AT1G76810.1	miR837-5p	2416	5.5	0.171175	1	no	NA	miR837-5p:AT1G76810.1	0.459332
AT2G04842.1	miR850	1664	6	0.34235	1.14616	no	EMB2761	miR850:EMB2761	0.459332
AT2G16940.3	miR414	1441	4	0.34235	0.796789	no	NA	miR414:AT2G16940.3	0.459332
AT4G23710.1	miR837-5p	324	5.5	0.684699	1	no	VAG2	miR837-5p:VAG2	0.459332
AT1G16010.3	miR8175	1492	4.5	0.513525	0.898395	no	AtMGT2	miR8175:AtMGT2	0.461296
AT1G69030.1	miR414	856	4	0.171175	0.872481	no	NA	miR414:AT1G69030.1	0.463508
AT2G34790.1	miR839-5p	1550	5	0.171175	1	no	EDA28	miR839-5p:EDA28	0.46554
AT2G38040.2	miR396a-5p	1994	5.5	0.513525	1	no	CAC3	miR396a-5p:CAC3	0.4768
AT3G22960.1	miR5658	320	3.5	0.171175	0.631064	no	PKP-ALPHA	miR5658:PKP-ALPHA	0.477636
AT3G60110.1	miR414	1698	4	0.171175	0.773806	no	NA	miR414:AT3G60110.1	0.477636
AT4G12240.1	miR396b-5p	955	4.5	0.513525	0.898395	no	NA	miR396b-5p:AT4G12240.1	0.481177
AT1G71030.1	miR858a	342	4.5	0.513525	0.898395	no	ATMYBL2	miR858a:ATMYBL2	0.48227
AT5G64360.4	miR835-5p	1005	4.5	0.171175	0.872481	no	EIP9	miR835-5p:EIP9	0.482424
AT1G09850.1	miR396b-5p	460	5.5	0.171175	1	no	XBCP3	miR396b-5p:XBCP3	0.482624
AT1G69440.1	miR5021	61	3	0.171175	0.872481	no	AGO7	miR5021:AGO7	0.482624
AT3G60220.1	miR5021	245	3	0.171175	0.872481	no	ATL4	miR5021:ATL4	0.482624
AT4G32620.2	miR775	1656	6	0.34235	1.14616	no	NA	miR775:AT4G32620.2	0.482624
AT5G55830.1	miR396b-5p	1787	5.5	0.171175	1	no	NA	miR396b-5p:AT5G55830.1	0.482624
AT2G01680.1	miR169g-3p	1323	4	0.171175	0.695184	no	NA	miR169g-3p:AT2G01680.1	0.483946
AT1G30690.2	miR4221	613	5	0.34235	1	no	NA	miR4221:AT1G30690.2	0.485856
AT4G33080.2	miR3932b-5p	594	5	0.171175	1	no	NA	miR3932b-5p:AT4G33080.2	0.485856
AT5G64816.2	miR5021	491	2.5	0.171175	0.631064	no	NA	miR5021:AT5G64816.2	0.485856
AT3G28040.1	miR867	2916	6	0.171175	1.17118	no	NA	miR867:AT3G28040.1	0.493564
AT5G12120.1	miR5012	703	5	0.171175	1	no	NA	miR5012:AT5G12120.1	0.494652
AT5G62700.1	miR774a	138	5	0.171175	1	no	TUB3	miR774a:TUB3	0.49575
AT3G24506.1	miR837-5p	440	5	0.171175	1	no	NA	miR837-5p:AT3G24506.1	0.497364
AT2G24830.1	miR847	810	6	0.171175	1	no	NA	miR847:AT2G24830.1	0.500557
AT3G16480.1	miR173-3p	1295	5.5	0.34235	1	no	MPPalpha	miR173-3p:MPPalpha	0.500557
AT5G24735.1	miR1886.1	63	3.5	0.171175	0.406246	no	NA	miR1886.1:AT5G24735.1	0.500557
AT2G32950.1	miR169a-3p	1802	5.5	0.171175	1	no	ATCOP1	miR169a-3p:ATCOP1	0.504844
AT1G12920.1	miR856	1359	4	0.513525	0.815532	no	ERF1-2	miR856:ERF1-2	0.507921
AT1G17220.1	miR414	1677	4.5	0.171175	0.872481	no	FUG1	miR414:FUG1	0.508268
AT1G33811.1	miR158a-5p	958	5.5	0.171175	1	no	NA	miR158a-5p:AT1G33811.1	0.508268
AT2G20920.1	miR159c	307	5.5	0.171175	1	no	NA	miR159c:AT2G20920.1	0.508268
AT2G46030.1	miR414	561	4.5	0.171175	0.872481	no	UBC6	miR414:UBC6	0.508268
AT4G33400.1	miR414	487	4.5	0.171175	0.872481	no	NA	miR414:AT4G33400.1	0.508268
AT3G19350.1	miR417	351	6	0.171175	1.17118	no	MPC	miR417:MPC	0.51023
AT3G61130.1	miR5595a	1208	5	0.171175	1	no	GAUT1	miR5595a:GAUT1	0.51023
AT4G09340.1	miR164b-3p	403	5	0.171175	1	no	NA	miR164b-3p:AT4G09340.1	0.511293
AT1G50200.2	miR160a-5p	1150	5	0.171175	1	no	ACD	miR160a-5p:ACD	0.515225
AT1G77250.1	miR390b-3p	1285	5	0.171175	1	no	NA	miR390b-3p:AT1G77250.1	0.515225
AT4G10480.2	miR414	216	5	0.34235	1	no	NA	miR414:AT4G10480.2	0.515225
AT4G12420.2	miR414	2007	5	0.34235	1	no	SKU5	miR414:SKU5	0.515225
AT4G38950.2	miR414	1661	5	0.171175	1	no	NA	miR414:AT4G38950.2	0.515225
AT5G23270.1	miR414	1745	5	0.171175	1	no	ATSTP11	miR414:ATSTP11	0.515225
AT5G57380.1	miR414	1449	5	0.171175	1	no	VIN3	miR414:VIN3	0.515225
AT1G74600.1	miR776	2408	5	0.171175	1	no	OTP87	miR776:OTP87	0.515786
AT2G28260.1	miR776	1818	5	0.171175	1	no	ATCNGC15	miR776:ATCNGC15	0.515786
AT5G59720.1	miR826a	252	5.5	0.171175	1	no	HSP18.2	miR826a:HSP18.2	0.516365
AT4G12670.1	miR156f-3p	957	6	0.171175	1	no	NA	miR156f-3p:AT4G12670.1	0.519795
AT1G06040.2	miR1886.1	706	3.5	2.39645	0.196763	no	BBX24	miR1886.1:BBX24	0.521473
AT1G67730.1	miR5654-5p	608	6	0.34235	1	no	ATKCR1	miR5654-5p:ATKCR1	0.521473
AT2G31270.1	miR396b-3p	1736	5.5	0.171175	1	no	ATCDT1A	miR396b-3p:ATCDT1A	0.521473
AT3G63460.3	miR838	1766	6	0.171175	1	no	NA	miR838:AT3G63460.3	0.521636
AT2G28350.1	miR172d-5p	1768	6	0.513525	1	no	ARF10	miR172d-5p:ARF10	0.524936
AT3G19870.1	miR4243	1682	5.5	0.171175	1	no	NA	miR4243:AT3G19870.1	0.527157
AT1G07200.2	miR5658	2978	3.5	0.171175	0.532783	no	NA	miR5658:AT1G07200.2	0.527397
AT4G08220.1	miR5637	420	6	0.855874	1.10161	no	NA	miR5637:AT4G08220.1	0.528256
AT2G44100.2	miR5014a-5p	870	5	0.34235	1	no	AT-GDI1	miR5014a-5p:AT-GDI1	0.52972
AT1G52600.1	miR868-5p	592	5.5	0.34235	1	no	NA	miR868-5p:AT1G52600.1	0.533203
AT2G03430.1	miR2112-3p	719	6	0.513525	1.12752	no	NA	miR2112-3p:AT2G03430.1	0.533203
AT2G35010.2	miR780.1	747	4.5	0.171175	0.872481	no	ATO1	miR780.1:ATO1	0.533203
AT5G27270.1	miR400	2333	4.5	1.19822	0.927754	no	EMB976	miR400:EMB976	0.533203
AT2G22475.2	miR5657	236	5.5	0.171175	1	no	GEM	miR5657:GEM	0.533313
AT2G30260.1	miR857	329	4.5	0.34235	0.886903	no	U2B''	miR857:U2B''	0.533313
AT2G33585.1	miR394a	370	6	0.171175	1	no	NA	miR394a:AT2G33585.1	0.533313
AT3G13780.1	miR414	586	4	0.171175	0.695184	no	NA	miR414:AT3G13780.1	0.533313
AT3G16910.1	miR168b-3p	794	6	0.171175	1	no	AAE7	miR168b-3p:AAE7	0.533313
AT3G52230.1	miR414	512	4	0.171175	0.695184	no	NA	miR414:AT3G52230.1	0.533313
AT4G17910.1	miR1886.2	340	5.5	0.171175	1	no	NA	miR1886.2:AT4G17910.1	0.533313
AT4G30935.1	miR3434-5p	1487	4.5	0.171175	0.872481	no	ATWRKY32	miR3434-5p:ATWRKY32	0.533313
AT5G26670.2	miR157c-3p	610	6	0.171175	1	no	NA	miR157c-3p:AT5G26670.2	0.533313
AT5G37070.1	miR5664	326	5.5	0.34235	1	no	NA	miR5664:AT5G37070.1	0.533313
AT2G11910.2	miR414	286	6	14.721	1.12218	no	NA	miR414:AT2G11910.2	0.534563
AT2G03150.1	miR4239	1327	6	0.34235	1	no	emb1579	miR4239:emb1579	0.537291
AT2G38120.1	miR5640	246	5.5	0.34235	1	no	AtAUX1	miR5640:AtAUX1	0.539564
AT4G14410.2	miR1886.3	332	5	0.171175	1	no	bHLH104	miR1886.3:bHLH104	0.540342
AT1G26260.3	miR2934-5p	365	6	0.171175	1	no	CIB5	miR2934-5p:CIB5	0.540374
AT1G62380.1	miR2939	1182	3.5	1.02705	0.156141	no	ACO2	miR2939:ACO2	0.540374
AT5G51840.1	miR839-5p	776	4	0.855874	0.684382	no	NA	miR839-5p:AT5G51840.1	0.540374
AT5G13680.1	miR158a-3p	2017	6	0.171175	1	no	ABO1	miR158a-3p:ABO1	0.54085
AT1G05590.1	miR8184	1689	6	0.513525	1.12752	no	ATHEX3	miR8184:ATHEX3	0.541796
AT1G19870.1	miR4227	2242	4	0.171175	0.695184	no	iqd32	miR4227:iqd32	0.541796
AT2G32000.2	miR417	2002	5.5	0.171175	1	no	NA	miR417:AT2G32000.2	0.541796
AT3G15840.5	miR867	393	5.5	0.171175	1	no	PIFI	miR867:PIFI	0.541796
AT4G11440.1	miR771	1875	5	0.0890109	0.929845	no	NA	miR771:AT4G11440.1	0.541796
AT5G54910.1	miR837-5p	1771	4	0.684699	0.621259	no	NA	miR837-5p:AT5G54910.1	0.541796
AT2G17640.1	miR5637	695	6	0.171175	1	no	ATSERAT3;1	miR5637:ATSERAT3;1	0.543571
AT4G31500.1	miR5024-3p	911	6	0.171175	1	no	ATR4	miR5024-3p:ATR4	0.543571
AT1G17220.1	miR844-3p	1489	6	0.34235	1	no	FUG1	miR844-3p:FUG1	0.544586
AT1G77122.1	miR158b	901	6	0.171175	1	no	NA	miR158b:AT1G77122.1	0.544586
AT5G17900.1	miR847	643	4.5	0.126669	0.839326	no	NA	miR847:AT5G17900.1	0.547645
AT2G31280.4	miR5650	2668	4	0.171175	0.631064	no	CPUORF7	miR5650:CPUORF7	0.550273
AT3G59280.1	miR159c	478	5	0.34235	1	no	TXR1	miR159c:TXR1	0.552904
AT5G59845.1	miR5021	52	3	0.513525	0.898395	no	NA	miR5021:AT5G59845.1	0.552904
AT4G02070.2	miR414	829	4	0.171175	0.773806	no	ATMSH6	miR414:ATMSH6	0.557128
AT4G22200.1	miR838	2759	4	1.3694	0.734636	no	AKT2	miR838:AKT2	0.557128
AT2G04390.1	miR847	328	5	0.10784	0.932296	no	NA	miR847:AT2G04390.1	0.55749
AT1G23860.4	miR2938	464	5.5	0.34235	1.14616	no	At-RSZ21	miR2938:At-RSZ21	0.562419
AT1G31410.1	miR5634	926	5	0.171175	1	no	NA	miR5634:AT1G31410.1	0.562419
AT2G24440.1	miR847	271	5.5	0.171175	1	no	NA	miR847:AT2G24440.1	0.562419
AT3G01460.1	miR3440b-5p	6792	4.5	1.3694	0.932625	no	ATMBD9	miR3440b-5p:ATMBD9	0.562419
AT3G06490.1	miR172b-5p	1391	5	0.34235	1	no	AtMYB108	miR172b-5p:AtMYB108	0.562419
AT4G22220.1	miR172b-5p	545	5	0.171175	1	no	ATISU1	miR172b-5p:ATISU1	0.562419
AT5G24150.2	miR847	1018	5.5	0.171175	1	no	SQE5	miR847:SQE5	0.562419
AT5G52650.1	miR866-3p	155	5	0.171175	1	no	NA	miR866-3p:AT5G52650.1	0.562419
AT1G09660.2	miR5666	682	4.5	0.171175	0.872481	no	NA	miR5666:AT1G09660.2	0.565513
AT4G29700.1	miR774a	462	6	0.171175	1	no	NA	miR774a:AT4G29700.1	0.565513
AT5G38150.1	miR4221	411	4	0.171175	0.494292	no	PMI15	miR4221:PMI15	0.565577
AT3G20050.1	miR5645a	1735	4.5	0.171175	0.872481	no	ATTCP-1	miR5645a:ATTCP-1	0.567981
AT2G38370.1	miR396b-5p	1139	6	0.171175	1	no	NA	miR396b-5p:AT2G38370.1	0.576152
AT2G03470.2	miR5013	978	6	0.34235	1	no	NA	miR5013:AT2G03470.2	0.578671
AT1G33230.1	miR5021	101	5	0.171175	1	no	NA	miR5021:AT1G33230.1	0.583052
AT3G26070.1	miR5021	125	5	0.171175	1	no	NA	miR5021:AT3G26070.1	0.583052
AT4G32330.3	miR5016	828	6	0.34235	1	no	NA	miR5016:AT4G32330.3	0.583052
AT5G66060.2	miR413	647	4	0.171175	0.695184	no	NA	miR413:AT5G66060.2	0.584539
AT2G44920.2	miR5661	603	5	0.171175	1	no	NA	miR5661:AT2G44920.2	0.589953
AT2G44770.1	miR396b-5p	586	4	0.684699	0.551619	no	NA	miR396b-5p:AT2G44770.1	0.593139
AT3G12550.2	miR159b-5p	1747	6	0.34235	1	no	FDM3	miR159b-5p:FDM3	0.593139
AT3G56370.1	miR159b-5p	3080	6	0.171175	1	no	NA	miR159b-5p:AT3G56370.1	0.593139
AT1G63170.1	miR5021	667	4	0.171175	1	no	NA	miR5021:AT1G63170.1	0.594082
AT4G00270.1	miR414	791	4	0.684699	0.711537	no	NA	miR414:AT4G00270.1	0.594082
AT4G12690.2	miR5021	1060	4	0.171175	1	no	NA	miR5021:AT4G12690.2	0.594082
AT1G76030.1	miR865-3p	1462	5.5	1.02705	1	no	AtVAB1	miR865-3p:AtVAB1	0.594652
AT2G33400.1	miR865-3p	560	5.5	0.34235	1	no	NA	miR865-3p:AT2G33400.1	0.594652
AT4G20960.1	miR865-3p	1203	5.5	0.171175	1	no	PyrD	miR865-3p:PyrD	0.594652
AT5G23405.2	miR414	475	4.5	0.34235	0.886903	no	NA	miR414:AT5G23405.2	0.594652
AT1G27210.1	miR4239	1861	5.5	0.171175	1	no	NA	miR4239:AT1G27210.1	0.595375
AT4G17640.2	miR825	592	5	0.171175	1	no	CKB2	miR825:CKB2	0.595375
AT5G10950.1	miR5998a	56	6	0.171175	1	no	NA	miR5998a:AT5G10950.1	0.597591
AT1G15710.1	miR8177	1187	4.5	0.171175	0.872481	no	NA	miR8177:AT1G15710.1	0.597764
AT5G11860.4	miR5643a	929	4.5	0.34235	0.886903	no	SSP5	miR5643a:SSP5	0.597764
AT1G07470.1	miR414	1112	4	0.0564877	0.550481	no	NA	miR414:AT1G07470.1	0.598705
AT5G60030.1	miR831-3p	777	5	1.54057	0.881249	no	NA	miR831-3p:AT5G60030.1	0.598705
AT1G55460.1	miR414	654	4	0.171175	0.532783	no	NA	miR414:AT1G55460.1	0.599588
AT1G65060.2	miR414	1603	5.5	0.171175	1	no	4CL3	miR414:4CL3	0.599723
AT1G67590.2	miR414	503	4	0.171175	0.631064	no	NA	miR414:AT1G67590.2	0.599723
AT2G04270.5	miR414	1459	5.5	0.171175	1	no	RNE	miR414:RNE	0.599723
AT2G21170.2	miR5021	269	3	0.34235	0.796789	no	PDTPI	miR5021:PDTPI	0.599723
AT2G22080.1	miR414	598	4	0.171175	0.631064	no	NA	miR414:AT2G22080.1	0.599723
AT2G41540.3	miR396b-5p	447	5.5	0.34235	1	no	GPDHC1	miR396b-5p:GPDHC1	0.599723
AT2G44060.2	miR414	1037	5.5	0.513525	1	no	NA	miR414:AT2G44060.2	0.599723
AT2G47460.1	miR5024-3p	1129	5.5	0.171175	1	no	ATMYB12	miR5024-3p:ATMYB12	0.599723
AT3G01390.2	miR837-5p	470	5.5	0.171175	1	no	AVMA10	miR837-5p:AVMA10	0.599723
AT3G49601.1	miR414	738	4.5	0.171175	0.872481	no	NA	miR414:AT3G49601.1	0.599723
AT3G56190.2	miR5663-5p	872	4.5	0.34235	0.928927	no	ALPHA-SNAP2	miR5663-5p:ALPHA-SNAP2	0.599723
AT4G21990.2	miR414	1442	5.5	0.171175	1	no	2018-04-03	miR414:APR3	0.599723
AT4G24960.3	miR414	695	5.5	0.171175	1	no	ATHVA22D	miR414:ATHVA22D	0.599723
AT4G35080.3	miR169d	703	4.5	0.171175	0.872481	no	NA	miR169d:AT4G35080.3	0.599723
AT4G38960.3	miR173-3p	911	4.5	0.171175	0.872481	no	BBX19	miR173-3p:BBX19	0.599723
AT5G02120.1	miR774b-5p	72	4	0.171175	0.773806	no	OHP	miR774b-5p:OHP	0.599723
AT5G42520.3	miR5658	561	5	0.171175	1	no	ATBPC6	miR5658:ATBPC6	0.599723
AT3G47630.2	miR159a	400	6	0.171175	1	no	NA	miR159a:AT3G47630.2	0.607969
AT4G12910.1	miR5637	944	5.5	0.34235	1	no	scpl20	miR5637:scpl20	0.611059
AT4G27310.1	miR414	582	5	0.855874	0.915554	no	BBX28	miR414:BBX28	0.611622
AT1G72310.1	miR3932a	1321	6	0.171175	1	no	ATL3	miR3932a:ATL3	0.612861
AT3G49601.1	miR1886.1	73	4	0.171175	0.773806	no	NA	miR1886.1:AT3G49601.1	0.614059
AT2G18670.1	miR169f-3p	711	6	0.171175	1	no	NA	miR169f-3p:AT2G18670.1	0.614529
AT1G52500.2	miR414	1099	4.5	0.171175	0.773806	no	ATFPG-1	miR414:ATFPG-1	0.617702
AT2G21390.1	miR8170-5p	1505	6	0.171175	1	no	NA	miR8170-5p:AT2G21390.1	0.617702
AT3G52930.1	miR863-5p	351	4.5	0.171175	0.773806	no	AtFBA8	miR863-5p:AtFBA8	0.617702
AT3G56590.2	miR5658	1261	4	0.171175	0.695184	no	NA	miR5658:AT3G56590.2	0.617702
AT4G10630.1	miR5638a	610	4.5	0.171175	0.773806	no	NA	miR5638a:AT4G10630.1	0.617702
AT4G31840.1	miR5021	208	5.5	0.171175	1	no	AtENODL15	miR5021:AtENODL15	0.617702
AT5G04560.2	miR172e-3p	4654	6	0.34235	1	no	DME	miR172e-3p:DME	0.617702
AT5G40610.1	miR854a	128	5.5	0.171175	1	no	GPDHp	miR854a:GPDHp	0.617702
AT5G51980.2	miR854a	324	5.5	0.171175	1	no	NA	miR854a:AT5G51980.2	0.617702
AT5G56950.1	miR414	1097	4	0.171175	0.494292	no	NAP1;3	miR414:NAP1;3	0.617702
AT4G24690.1	miR159b-5p	2026	5.5	0.34235	1	no	AtNBR1	miR159b-5p:AtNBR1	0.624672
AT2G43790.1	miR159c	1335	4.5	0.171175	0.872481	no	ATMAPK6	miR159c:ATMAPK6	0.626884
AT3G24080.2	miR414	1200	4	0.34235	0.566536	no	NA	miR414:AT3G24080.2	0.626884
AT3G52180.2	miR8166	113	4.5	0.171175	0.872481	no	ATPTPKIS1	miR8166:ATPTPKIS1	0.626884
AT5G01020.1	miR169g-3p	1344	5.5	0.171175	1	no	NA	miR169g-3p:AT5G01020.1	0.626884
AT5G46580.1	miR4245	987	4.5	0.513525	0.898395	no	NA	miR4245:AT5G46580.1	0.626884
AT1G65440.3	miR414	246	4	2.56762	0.444942	no	GTB1	miR414:GTB1	0.628618
AT1G55250.4	miR8170-3p	677	5	0.684699	0.907766	no	HUB2	miR8170-3p:HUB2	0.629018
AT1G79750.1	miR837-3p	2249	3.5	0.171175	0.460989	no	ATNADP-ME4	miR837-3p:ATNADP-ME4	0.629018
AT1G20610.1	miR447a.2-3p	1299	6	0.171175	1	no	CYCB2;3	miR447a.2-3p:CYCB2;3	0.629204
AT2G20290.1	miR413	782	5	0.171175	0.872481	no	ATXIG	miR413:ATXIG	0.630817
AT3G11964.1	miR5998a	4849	5.5	0.171175	1	no	NA	miR5998a:AT3G11964.1	0.631145
AT5G42950.1	miR5015	4990	5.5	0.34235	1	no	NA	miR5015:AT5G42950.1	0.631145
AT1G27500.1	miR8184	168	5.5	0.171175	1	no	KLCR3	miR8184:KLCR3	0.63353
AT2G11910.2	miR414	442	4	0.34235	0.528366	no	NA	miR414:AT2G11910.2	0.633755
AT3G16840.1	miR172b-5p	796	5.5	0.171175	1	no	NA	miR172b-5p:AT3G16840.1	0.633755
AT2G33590.1	miR5661	1048	6	0.171175	1	no	AtCRL1	miR5661:AtCRL1	0.63492
AT4G26790.2	miR822-5p	144	5.5	0.171175	1	no	NA	miR822-5p:AT4G26790.2	0.635821
AT2G19870.1	miR3434-5p	694	4	0.34235	0.528366	no	NA	miR3434-5p:AT2G19870.1	0.637587
AT2G47230.2	miR395a	1867	5.5	0.171175	1	no	ATDUF6	miR395a:ATDUF6	0.637587
AT1G15180.2	miR170-5p	1619	5.5	0.171175	1	no	NA	miR170-5p:AT1G15180.2	0.6405
AT2G17420.1	miR5021	121	4.5	0.171175	1	no	ATNTRA	miR5021:ATNTRA	0.642992
AT3G18240.2	miR5645a	684	4.5	0.171175	0.872481	no	NA	miR5645a:AT3G18240.2	0.643171
AT1G14630.1	miR847	473	6	0.171175	1	no	NA	miR847:AT1G14630.1	0.647118
AT1G35680.1	miR159a	28	5.5	0.171175	1	no	RPL21C	miR159a:RPL21C	0.647118
AT2G16640.1	miR2934-3p	3288	5.5	0.171175	1	no	ATTOC132	miR2934-3p:ATTOC132	0.647118
AT2G20990.3	miR5014a-5p	2069	4	0.171175	0.460989	no	ATSYTA	miR5014a-5p:ATSYTA	0.647118
AT3G56910.1	miR5021	151	3.5	0.171175	0.872481	no	PSRP5	miR5021:PSRP5	0.647118
AT4G08460.3	miR847	780	4	1.02705	0.224102	no	NA	miR847:AT4G08460.3	0.647118
AT5G62270.2	miR847	821	6	0.171175	1	no	GCD1	miR847:GCD1	0.647118
AT5G15580.1	miR5014b	3006	5.5	0.171175	1	no	LNG1	miR5014b:LNG1	0.647551
AT1G62750.1	miR842	2095	5	0.171175	0.872481	no	ATSCO1	miR842:ATSCO1	0.648685
AT5G11890.1	miR156i	51	6	0.171175	1	no	EMB3135	miR156i:EMB3135	0.652125
AT4G25340.2	miR5634	1533	5.5	0.171175	1	no	ATFKBP53	miR5634:ATFKBP53	0.652393
AT3G13890.2	miR5658	983	6	0.34235	1	no	ATMYB26	miR5658:ATMYB26	0.65289
AT1G07370.1	miR5998a	618	6	0.34235	1.14616	no	ATPCNA1	miR5998a:ATPCNA1	0.657848
AT2G40000.1	miR5027	1085	5	0.171175	0.872481	no	ATHSPRO2	miR5027:ATHSPRO2	0.658273
AT3G13480.1	miR414	312	4	0.171175	0.299536	no	NA	miR414:AT3G13480.1	0.662426
AT5G33370.2	miR5663-3p	133	5.5	0.171175	1	no	NA	miR5663-3p:AT5G33370.2	0.662426
AT1G63080.1	miR161.2	1027	4	0.171175	0.185712	yes	NA	miR161.2:AT1G63080.1	0.666614
AT1G67350.2	miR854a	355	5	0.684699	1	no	NA	miR854a:AT1G67350.2	0.666614
AT1G72440.1	miR414	2884	4	0.34235	0.238779	no	EDA25	miR414:EDA25	0.666614
AT2G01690.2	miR5658	2466	4.5	0.34235	0.886903	no	NA	miR5658:AT2G01690.2	0.666614
AT3G10680.1	miR3440b-5p	1357	6	0.171175	1	no	NA	miR3440b-5p:AT3G10680.1	0.666614
AT4G02590.3	miR5640	954	4	0.171175	0.577773	no	UNE12	miR5640:UNE12	0.666614
AT5G23920.1	miR157d	804	5.5	0.171175	1	no	NA	miR157d:AT5G23920.1	0.666614
AT1G07480.2	miR414	1195	4	0.457037	0.172057	no	NA	miR414:AT1G07480.2	0.666826
AT5G45940.2	miR401	468	5	0.171175	0.872481	no	AtNUDT11	miR401:AtNUDT11	0.669692
AT2G33730.1	miR390a-5p	2200	5	0.34235	0.886903	no	NA	miR390a-5p:AT2G33730.1	0.674648
AT3G18960.1	miR838	707	6	0.171175	1	no	NA	miR838:AT3G18960.1	0.675612
AT5G53460.3	miR172d-5p	730	5	0.171175	0.872481	no	GLT1	miR172d-5p:GLT1	0.677009
AT1G18480.1	miR8172	1213	5.5	0.34235	1	no	AtSLP2	miR8172:AtSLP2	0.681304
AT1G70850.3	miR773b-3p	556	5	0.00171175	0.998294	no	MLP34	miR773b-3p:MLP34	0.681304
AT1G01230.1	miR156g	264	4	0.171175	0.695184	no	NA	miR156g:AT1G01230.1	0.681305
AT1G09340.1	miR850	1381	6	0.171175	1	no	CRB	miR850:CRB	0.681305
AT3G08520.1	miR831-3p	29	6	0.63677	1.08143	no	NA	miR831-3p:AT3G08520.1	0.681305
AT3G15810.1	miR824-3p	396	6	0.171175	1	no	NA	miR824-3p:AT3G15810.1	0.681305
AT5G09590.1	miR5638a	2225	4	0.513525	0.357079	no	HSC70-5	miR5638a:HSC70-5	0.681305
AT3G03970.3	miR5658	2121	5.5	0.171175	1	no	NA	miR5658:AT3G03970.3	0.681357
AT2G17350.1	miR865-3p	261	6	0.34235	1	no	NA	miR865-3p:AT2G17350.1	0.682844
AT3G56020.1	miR831-3p	71	6	0.219104	1.00993	no	NA	miR831-3p:AT3G56020.1	0.682844
AT4G22580.1	miR167a-3p	924	6	0.34235	1	no	NA	miR167a-3p:AT4G22580.1	0.682844
AT5G01510.1	miR834	615	5.5	0.171175	1	no	RUS5	miR834:RUS5	0.682844
AT3G13780.1	miR831-3p	611	6	0.171175	1	no	NA	miR831-3p:AT3G13780.1	0.683427
AT1G55300.2	miR399c-5p	526	5	0.171175	0.872481	no	TAF7	miR399c-5p:TAF7	0.683519
AT4G27130.1	miR5632-3p	173	6	0.171175	1	no	NA	miR5632-3p:AT4G27130.1	0.683519
AT1G29880.1	miR835-5p	1997	6	0.171175	1	no	NA	miR835-5p:AT1G29880.1	0.684395
AT3G52560.4	miR5652	453	4.5	0.171175	0.773806	no	MMZ4	miR5652:MMZ4	0.685062
AT4G34588.1	miR5021	107	6	0.171175	1	no	CPuORF2	miR5021:CPuORF2	0.687263
AT4G34590.1	miR5021	107	6	0.171175	1	no	ATB2	miR5021:ATB2	0.687263
AT1G26480.1	miR5638b	896	5	0.171175	0.872481	no	GF14 IOTA	miR5638b:GF14 IOTA	0.688472
AT1G68440.1	miR414	419	4.5	0.171175	0.695184	no	NA	miR414:AT1G68440.1	0.688472
AT2G19572.1	miR847	390	4.5	0.171175	0.631064	no	NA	miR847:AT2G19572.1	0.688472
AT2G27170.2	miR414	3359	4.5	0.171175	0.695184	no	SMC3	miR414:SMC3	0.688472
AT4G22285.1	miR414	513	4.5	0.171175	0.695184	no	NA	miR414:AT4G22285.1	0.688472
AT1G14130.1	miR4221	556	6	0.171175	1	no	NA	miR4221:AT1G14130.1	0.690567
AT3G19960.2	miR4221	1159	6	0.34235	1	no	ATM1	miR4221:ATM1	0.690567
AT5G65450.1	miR8183	1967	5	0.171175	0.872481	no	UBP17	miR8183:UBP17	0.690623
AT5G06180.2	miR158a-3p	927	6	0.171175	1	no	NA	miR158a-3p:AT5G06180.2	0.692026
AT1G28420.1	miR8173	1105	5	0.171175	0.872481	no	HB-1	miR8173:HB-1	0.696527
AT3G48760.1	miR779.1	1498	5	0.34235	0.886903	no	NA	miR779.1:AT3G48760.1	0.698625
AT3G45830.1	miR414	1012	6	0.513525	1	no	NA	miR414:AT3G45830.1	0.698801
AT5G40770.1	miR842	254	6	0.171175	1	no	ATPHB3	miR842:ATPHB3	0.698801
AT1G27650.2	miR838	455	5	0.171175	0.872481	no	ATU2AF35A	miR838:ATU2AF35A	0.701648
AT3G04260.1	miR847	1763	5	0.171175	0.872481	no	PDE324	miR847:PDE324	0.701853
AT3G01500.3	miR5658	1200	4	1.02705	0.270106	no	ATBCA1	miR5658:ATBCA1	0.704696
AT1G20770.1	miR780.2	104	4.5	0.34235	0.662218	no	NA	miR780.2:AT1G20770.1	0.707348
AT1G11840.6	miR156h	1209	4	0.171175	0.695184	no	ATGLX1	miR156h:ATGLX1	0.707975
AT1G17470.2	miR5998a	187	6	0.171175	1	no	ATDRG	miR5998a:ATDRG	0.707975
AT1G22970.1	miR414	625	4.5	0.171175	0.695184	no	NA	miR414:AT1G22970.1	0.707975
AT1G26110.2	miR414	1686	4.5	0.171175	0.695184	no	DCP5	miR414:DCP5	0.707975
AT1G36160.2	miR5998a	5888	6	0.513525	1	no	ACC1	miR5998a:ACC1	0.707975
AT1G44575.2	miR5998a	38	6	0.171175	1	no	CP22	miR5998a:CP22	0.707975
AT1G55350.5	miR776	7109	5	0.171175	0.872481	no	ATDEK1	miR776:ATDEK1	0.707975
AT1G68790.1	miR773b-3p	1588	4.5	0.171175	0.631064	no	CRWN3	miR773b-3p:CRWN3	0.707975
AT1G74840.2	miR863-5p	280	6	0.34235	1	no	NA	miR863-5p:AT1G74840.2	0.707975
AT2G27110.3	miR8177	2645	6	0.513525	1	no	FRS3	miR8177:FRS3	0.707975
AT2G32235.1	miR5021	412	5	0.171175	1	no	NA	miR5021:AT2G32235.1	0.707975
AT2G32240.1	miR5021	4034	5	0.171175	1	no	NA	miR5021:AT2G32240.1	0.707975
AT2G34300.2	miR170-5p	390	4.5	0.171175	0.577773	no	NA	miR170-5p:AT2G34300.2	0.707975
AT2G34870.1	miR390a-5p	332	6	1.19822	1	no	MEE26	miR390a-5p:MEE26	0.707975
AT3G17170.1	miR414	807	4.5	0.171175	0.695184	no	RFC3	miR414:RFC3	0.707975
AT3G22790.1	miR776	2725	6	0.171175	1	no	NET1A	miR776:NET1A	0.707975
AT3G50690.1	miR414	898	5	0.34235	0.886903	no	NA	miR414:AT3G50690.1	0.707975
AT4G02720.1	miR3434-5p	212	4.5	0.513525	0.746664	no	NA	miR3434-5p:AT4G02720.1	0.707975
AT4G25835.1	miR4243	806	6	0.171175	1	no	NA	miR4243:AT4G25835.1	0.707975
AT4G39330.2	miR841b-5p	348	6	0.513525	1	no	ATCAD9	miR841b-5p:ATCAD9	0.707975
AT5G28740.1	miR5998a	660	5	0.34235	0.886903	no	NA	miR5998a:AT5G28740.1	0.707975
AT5G43280.2	miR399e	807	4.5	0.34235	0.723298	no	ATDCI1	miR399e:ATDCI1	0.707975
AT5G64360.4	miR414	937	4.5	0.171175	0.695184	no	EIP9	miR414:EIP9	0.707975
AT5G65620.1	miR5021	98	5	0.171175	1	no	NA	miR5021:AT5G65620.1	0.707975
AT1G08450.3	miR835-5p	1058	4.5	0.171175	0.577773	no	AtCRT3	miR835-5p:AtCRT3	0.710211
AT1G08540.1	miR829-5p	1015	6	0.34235	1	no	ABC1	miR829-5p:ABC1	0.710211
AT3G28050.1	miR5998a	83	5	0.171175	0.872481	no	UMAMIT41	miR5998a:UMAMIT41	0.710211
AT4G02600.2	miR829-5p	1722	6	0.34235	1	no	ATMLO1	miR829-5p:ATMLO1	0.710211
AT1G30230.2	miR5665	662	6	0.855874	1	no	eEF-1Bb1	miR5665:eEF-1Bb1	0.715038
AT5G23940.1	miR3440b-3p	713	4.5	0.171175	0.695184	no	DCR	miR3440b-3p:DCR	0.715038
AT4G12390.1	miR161.2	629	6	0.171175	1	no	PME1	miR161.2:PME1	0.716394
AT2G05220.2	miR847	336	5	0.576859	0.857568	no	NA	miR847:AT2G05220.2	0.717224
AT5G07090.2	miR5640	976	4.5	0.171175	0.773806	no	NA	miR5640:AT5G07090.2	0.718404
AT1G27752.2	miR847	2578	5	0.684699	0.831109	no	NA	miR847:AT1G27752.2	0.718678
AT1G77550.1	miR841a-3p	2132	6	0.171175	1	no	NA	miR841a-3p:AT1G77550.1	0.731131
AT1G26090.1	miR5021	1102	5.5	0.171175	1	no	NA	miR5021:AT1G26090.1	0.732316
AT1G30530.1	miR773b-3p	1144	4.5	1.54057	0.533078	no	UGT78D1	miR773b-3p:UGT78D1	0.732316
AT1G78880.1	miR5021	1998	3.5	0.34235	0.662218	no	NA	miR5021:AT1G78880.1	0.732316
AT1G78882.1	miR5021	1998	3.5	0.34235	0.662218	no	CPuORF56	miR5021:CPuORF56	0.732316
AT2G41190.1	miR861-3p	1832	6	0.171175	1	no	NA	miR861-3p:AT2G41190.1	0.732316
AT3G04860.1	miR4228-3p	434	6	0.171175	1	no	NA	miR4228-3p:AT3G04860.1	0.732316
AT3G62360.1	miR5632-3p	3485	4.5	0.171175	0.695184	no	NA	miR5632-3p:AT3G62360.1	0.732316
AT4G10430.3	miR5021	470	5.5	0.171175	1	no	NA	miR5021:AT4G10430.3	0.732316
AT4G21160.4	miR829-5p	1267	5	0.855874	0.915554	no	AGD12	miR829-5p:AGD12	0.732316
AT5G16640.1	miR161.2	832	4.5	0.171175	0.631064	no	NA	miR161.2:AT5G16640.1	0.732316
AT5G22650.2	miR414	587	4.5	1.71175	0.637711	no	ATHD2	miR414:ATHD2	0.732316
AT5G24120.1	miR414	471	4.5	0.171175	0.631064	no	ATSIG5	miR414:ATSIG5	0.732316
AT5G45590.1	miR8180	133	6	0.171175	1	no	NA	miR8180:AT5G45590.1	0.732316
AT5G62220.1	miR3434-3p	164	6	0.171175	1	no	ATGT18	miR3434-3p:ATGT18	0.732316
AT5G63550.2	miR414	1598	4.5	0.34235	0.662218	no	NA	miR414:AT5G63550.2	0.732316
AT1G02020.2	miR5021	281	4	0.171175	0.872481	no	NA	miR5021:AT1G02020.2	0.734299
AT5G66800.1	miR5021	386	4	0.171175	0.872481	no	NA	miR5021:AT5G66800.1	0.734299
AT1G24160.2	miR396a-5p	786	4.5	0.171175	0.577773	no	NA	miR396a-5p:AT1G24160.2	0.735883
AT2G25520.1	miR5029	880	6	0.513525	1.12752	no	NA	miR5029:AT2G25520.1	0.735883
AT1G54380.1	miR5654-3p	126	6	0.171175	1	no	NA	miR5654-3p:AT1G54380.1	0.736206
AT3G10250.2	miR1886.1	1246	6	0.171175	1	no	NA	miR1886.1:AT3G10250.2	0.736206
AT1G01620.2	miR157c-3p	320	5.5	0.34235	0.886903	no	PIP1;3	miR157c-3p:PIP1;3	0.736659
AT4G34090.3	miR5636	515	5	0.171175	0.872481	no	NA	miR5636:AT4G34090.3	0.742122
AT5G13170.1	miR156i	1050	6	0.34235	1	no	AtSWEET15	miR156i:AtSWEET15	0.742122
AT3G04730.1	miR391-3p	784	4.5	0.513525	0.44562	no	IAA16	miR391-3p:IAA16	0.742345
AT4G27700.1	miR835-3p	561	4	0.171175	0.0351156	no	NA	miR835-3p:AT4G27700.1	0.742345
AT1G63770.5	miR862-3p	2600	4.5	0.171175	0.631064	no	NA	miR862-3p:AT1G63770.5	0.742763
AT5G06970.1	miR158a-5p	2528	4.5	0.171175	0.532783	no	NA	miR158a-5p:AT5G06970.1	0.742763
AT5G03670.1	miR859	1586	4.5	0.171175	0.532783	no	TRM28	miR859:TRM28	0.747465
AT1G18610.1	miR160c-3p	1199	5	0.171175	0.872481	no	NA	miR160c-3p:AT1G18610.1	0.748403
AT1G65010.1	miR835-5p	1728	5	0.171175	0.773806	no	NA	miR835-5p:AT1G65010.1	0.748403
AT2G29900.1	miR838	896	5	0.171175	0.773806	no	PS2	miR838:PS2	0.748403
AT3G18490.1	miR847	1195	5	11.4687	0.793124	no	ASPG1	miR847:ASPG1	0.748403
AT1G27660.1	miR831-3p	1354	5.5	0.171175	0.872481	no	NA	miR831-3p:AT1G27660.1	0.753107
AT2G39730.3	miR5640	123	6	0.171175	1	no	RCA	miR5640:RCA	0.754163
AT4G39960.1	miR396a-5p	758	4.5	0.171175	0.494292	no	NA	miR396a-5p:AT4G39960.1	0.754163
AT1G80480.1	miR5658	1065	6	0.171175	1	no	PTAC17	miR5658:PTAC17	0.755559
AT2G45850.2	miR837-5p	1120	4.5	0.171175	0.460989	no	NA	miR837-5p:AT2G45850.2	0.755559
AT3G13890.2	miR5658	1032	6	0.171175	1	no	ATMYB26	miR5658:ATMYB26	0.755559
AT4G35560.2	miR5658	2720	6	0.171175	1	no	DAW1	miR5658:DAW1	0.755559
AT2G39770.2	miR865-3p	646	5	0.171175	0.773806	no	CYT1	miR865-3p:CYT1	0.758209
AT4G08310.1	miR414	1506	4.5	0.171175	0.532783	no	NA	miR414:AT4G08310.1	0.760539
AT4G32520.2	miR393a-3p	1036	4.5	0.171175	0.328279	no	AtSHMT3	miR393a-3p:AtSHMT3	0.760972
AT1G67230.1	miR838	1015	5	0.34235	0.796789	no	CRWN1	miR838:CRWN1	0.763572
AT5G03670.1	miR866-3p	1639	4.5	0.34235	0.662218	no	TRM28	miR866-3p:TRM28	0.764941
AT1G07320.4	miR865-3p	595	5	1.02705	0.797872	no	EMB2784	miR865-3p:EMB2784	0.767083
AT5G19320.1	miR414	1714	4.5	0.513525	0.524997	no	RANGAP2	miR414:RANGAP2	0.768177
AT1G71695.1	miR8180	852	5	0.171175	0.872481	no	NA	miR8180:AT1G71695.1	0.770313
AT5G60030.1	miR773a	424	4.5	0.171175	0.363125	no	NA	miR773a:AT5G60030.1	0.770313
AT3G01370.1	miR396b-5p	447	4.5	0.171175	0.383476	no	ATCFM2	miR396b-5p:ATCFM2	0.7709
AT3G55605.1	miR414	472	5.5	0.171175	0.872481	no	NA	miR414:AT3G55605.1	0.773619
AT2G07050.1	miR5654-5p	671	5.5	0.171175	0.872481	no	CAS1	miR5654-5p:CAS1	0.777417
AT3G02200.2	miR824-3p	539	5	0.171175	0.773806	no	NA	miR824-3p:AT3G02200.2	0.778938
AT1G80920.1	miR5658	210	5	0.34235	0.886903	no	AtJ8	miR5658:AtJ8	0.781229
AT3G58270.2	miR830-5p	885	5	0.171175	0.773806	no	NA	miR830-5p:AT3G58270.2	0.781826
AT3G58220.2	miR837-5p	1224	5.5	0.34235	0.886903	no	NA	miR837-5p:AT3G58220.2	0.782473
AT3G53610.3	miR172c	589	4.5	1.19822	0.538628	no	ATRAB8	miR172c:ATRAB8	0.785736
AT1G15830.1	miR414	1213	5	0.171175	0.773806	no	NA	miR414:AT1G15830.1	0.787159
AT1G23600.2	miR396b-5p	402	5	0.171175	0.773806	no	NA	miR396b-5p:AT1G23600.2	0.787159
AT1G35420.2	miR414	323	5	0.171175	0.773806	no	NA	miR414:AT1G35420.2	0.787159
AT3G17170.1	miR414	768	5	1.3694	0.77581	no	RFC3	miR414:RFC3	0.787159
AT5G13590.1	miR779.1	2580	5.5	0.171175	0.872481	no	NA	miR779.1:AT5G13590.1	0.787159
AT3G07860.1	miR5020b	420	6	0.171175	1	no	NA	miR5020b:AT3G07860.1	0.787895
AT4G02380.2	miR847	350	5	0.171175	0.773806	no	AtLEA5	miR847:AtLEA5	0.787895
AT5G19950.3	miR847	1334	5	0.171175	0.773806	no	NA	miR847:AT5G19950.3	0.787895
AT3G58120.1	miR5658	572	5	0.171175	0.872481	no	ATBZIP61	miR5658:ATBZIP61	0.789822
AT4G02510.1	miR838	883	4.5	0.171175	0.0492788	no	ATTOC159	miR838:ATTOC159	0.789822
AT1G07920.1	miR414	1280	4.5	0.041082	0.427948	no	NA	miR414:AT1G07920.1	0.791012
AT1G13350.2	miR4221	487	5.5	0.513525	0.898395	no	NA	miR4221:AT1G13350.2	0.791803
AT2G22420.1	miR2934-5p	1000	4.5	0.34235	0.262783	no	NA	miR2934-5p:AT2G22420.1	0.791803
AT2G22795.1	miR831-3p	206	5.5	0.855874	0.915554	no	NA	miR831-3p:AT2G22795.1	0.791803
AT3G63130.2	miR829-5p	1814	4.5	2.56762	0.278479	no	ATRANGAP1	miR829-5p:ATRANGAP1	0.791803
AT5G18570.1	miR414	470	4.5	0.513525	0.404816	no	ATOBGC	miR414:ATOBGC	0.791803
AT4G32590.4	miR396a-5p	429	5	0.171175	0.773806	no	NA	miR396a-5p:AT4G32590.4	0.793173
AT5G44620.1	miR396a-5p	864	5.5	0.171175	0.872481	no	CYP706A3	miR396a-5p:CYP706A3	0.79319
AT1G80930.1	miR5641	2854	6	0.684699	1	no	NA	miR5641:AT1G80930.1	0.795661
AT3G27200.1	miR398a-3p	268	5.5	0.513525	0.898395	no	NA	miR398a-3p:AT3G27200.1	0.800108
AT3G58730.1	miR861-3p	884	4.5	0.171175	0.363125	no	NA	miR861-3p:AT3G58730.1	0.801508
AT5G01880.1	miR2939	1267	5.5	0.171175	0.872481	no	NA	miR2939:AT5G01880.1	0.801819
AT5G01881.1	miR2939	328	5.5	0.171175	0.872481	no	NA	miR2939:AT5G01881.1	0.801819
AT1G07940.2	miR414	1411	4.5	0.0838757	0.325351	no	NA	miR414:AT1G07940.2	0.803467
AT3G22310.1	miR773a	1532	5.5	0.34235	0.886903	no	ATRH9	miR773a:ATRH9	0.803467
AT5G45390.1	miR5021	36	6	0.171175	1	no	CLPP4	miR5021:CLPP4	0.803467
AT1G20696.3	miR414	569	4.5	0.855874	0.302494	no	HMGB3	miR414:HMGB3	0.805712
AT4G32250.3	miR396a-5p	1759	5	0.171175	0.773806	no	NA	miR396a-5p:AT4G32250.3	0.805712
AT5G02940.1	miR847	1798	5.5	0.171175	0.872481	no	NA	miR847:AT5G02940.1	0.805712
AT5G22830.1	miR847	1113	5.5	0.171175	0.872481	no	ATMGT10	miR847:ATMGT10	0.805712
AT1G47550.2	miR414	1721	5	0.171175	0.773806	no	SEC3A	miR414:SEC3A	0.806031
AT1G56450.1	miR172d-5p	637	4.5	0.171175	0.27542	no	PBG1	miR172d-5p:PBG1	0.806031
AT1G65440.3	miR414	538	5.5	0.34235	0.886903	no	GTB1	miR414:GTB1	0.806031
AT1G03770.3	miR865-3p	692	5.5	0.171175	0.872481	no	ATRING1B	miR865-3p:ATRING1B	0.810198
AT1G14740.1	miR857	1883	5	0.513525	0.815532	no	TTA1	miR857:TTA1	0.810198
AT5G23410.1	miR865-3p	211	5.5	0.169463	0.873434	no	NA	miR865-3p:AT5G23410.1	0.810198
AT1G22060.1	miR831-3p	2445	5	0.171175	0.695184	no	NA	miR831-3p:AT1G22060.1	0.810631
AT1G49760.2	miR8183	2090	5	0.34235	0.796789	no	PAB8	miR8183:PAB8	0.810631
AT1G35310.1	miR414	288	4.5	1.19822	0.201152	no	MLP168	miR414:MLP168	0.810827
AT1G07930.2	miR414	1061	4.5	0.217392	0.158566	no	NA	miR414:AT1G07930.2	0.813541
AT4G00720.1	miR5021	1908	4	0.513525	0.815532	no	ASKTHETA	miR5021:ASKTHETA	0.813541
AT4G02940.1	miR408-5p	1935	5	0.171175	0.872481	no	NA	miR408-5p:AT4G02940.1	0.813541
AT2G16860.1	miR847	338	6	1.02705	0.922132	no	NA	miR847:AT2G16860.1	0.814246
AT2G30860.2	miR5998a	101	5.5	0.171175	0.872481	no	ATGSTF7	miR5998a:ATGSTF7	0.814246
AT4G30930.1	miR395b	417	5.5	0.171175	0.872481	no	NFD1	miR395b:NFD1	0.814246
AT5G12210.2	miR2938	529	5.5	0.171175	0.872481	no	AtRGTB1	miR2938:AtRGTB1	0.814246
AT5G45670.1	miR5014b	979	5.5	0.513525	0.898395	no	NA	miR5014b:AT5G45670.1	0.814246
AT1G08780.1	miR869.2	148	5	0.855874	0.783267	no	AIP3	miR869.2:AIP3	0.818674
AT1G22882.1	miR835-5p	1794	5	0.171175	0.695184	no	NA	miR835-5p:AT1G22882.1	0.818674
AT1G31580.1	miR5021	173	4	0.171175	0.773806	no	CXC750	miR5021:CXC750	0.818674
AT1G43910.1	miR414	985	5.5	0.171175	0.872481	no	NA	miR414:AT1G43910.1	0.818674
AT1G58250.2	miR773a	6432	5.5	0.171175	0.872481	no	HPS4	miR773a:HPS4	0.818674
AT2G28910.1	miR414	876	5.5	0.171175	0.872481	no	CXIP4	miR414:CXIP4	0.818674
AT2G42790.1	miR8178	1264	4.5	0.171175	0.15258	no	CSY3	miR8178:CSY3	0.818674
AT3G07050.1	miR172b-5p	1235	4.5	0.34235	0.465622	no	NSN1	miR172b-5p:NSN1	0.818674
AT3G15820.1	miR5021	778	4	0.171175	0.773806	no	ROD1	miR5021:ROD1	0.818674
AT3G16940.1	miR857	2128	5	0.171175	0.773806	no	NA	miR857:AT3G16940.1	0.818674
AT3G46740.1	miR414	405	5.5	0.171175	0.872481	no	2018-03-01	miR414:MAR1	0.818674
AT3G57570.2	miR5021	3465	4	0.171175	0.773806	no	NA	miR5021:AT3G57570.2	0.818674
AT4G14342.1	miR5021	68	4	0.171175	0.773806	no	NA	miR5021:AT4G14342.1	0.818674
AT5G03160.1	miR172c	1436	5	0.513525	0.815532	no	ATP58IPK	miR172c:ATP58IPK	0.818674
AT5G58130.1	miR414	1430	5.5	0.171175	0.872481	no	ROS3	miR414:ROS3	0.818674
AT5G65290.2	miR414	2614	5.5	0.171175	0.872481	no	NA	miR414:AT5G65290.2	0.818674
AT3G15270.1	miR847	190	5	0.34235	0.723298	no	SPL5	miR847:SPL5	0.819801
AT2G33120.3	miR824-3p	577	5.5	0.171175	0.872481	no	ATVAMP722	miR824-3p:ATVAMP722	0.821526
AT1G70580.4	miR413	1235	5.5	0.171175	0.872481	no	AOAT2	miR413:AOAT2	0.827164
AT4G36520.1	miR773a	2367	5	0.171175	0.695184	no	NA	miR773a:AT4G36520.1	0.827626
AT2G19860.2	miR5016	1393	5.5	0.171175	0.872481	no	ATHXK2	miR5016:ATHXK2	0.830179
AT1G28060.1	miR5658	2410	4.5	0.171175	0.344823	no	NA	miR5658:AT1G28060.1	0.835456
AT1G14440.2	miR5645a	1093	5	0.171175	0.773806	no	AtHB31	miR5645a:AtHB31	0.841147
AT2G40730.1	miR5019	1379	5	0.34235	0.796789	no	CTEXP	miR5019:CTEXP	0.841147
AT1G71040.1	miR5015	651	5	0.171175	0.695184	no	LPR2	miR5015:LPR2	0.843727
AT4G33230.1	miR837-5p	1622	5.5	0.171175	0.872481	no	NA	miR837-5p:AT4G33230.1	0.843727
AT5G08139.1	miR167a-3p	286	5	0.34235	0.723298	no	NA	miR167a-3p:AT5G08139.1	0.843727
AT5G56190.2	miR837-5p	1361	5.5	0.171175	0.872481	no	NA	miR837-5p:AT5G56190.2	0.843727
AT1G42550.1	miR158a-5p	1290	5	0.171175	0.695184	no	PMI1	miR158a-5p:PMI1	0.844501
AT5G57570.1	miR837-5p	197	5	0.171175	0.695184	no	NA	miR837-5p:AT5G57570.1	0.845273
AT5G61440.1	miR396b-5p	718	5	0.171175	0.695184	no	ACHT5	miR396b-5p:ACHT5	0.848732
AT5G44180.2	miR414	4216	5	1.71175	0.7253	no	RLT2	miR414:RLT2	0.850565
AT3G19850.1	miR846-3p	1473	5.5	0.684699	0.907766	no	NA	miR846-3p:AT3G19850.1	0.855774
AT5G45670.1	miR167a-3p	1107	5	0.171175	0.695184	no	NA	miR167a-3p:AT5G45670.1	0.855774
AT2G03310.1	miR5021	514	4	0.171175	0.695184	no	NA	miR5021:AT2G03310.1	0.858103
AT4G01080.1	miR5021	116	4	0.171175	0.695184	no	TBL26	miR5021:TBL26	0.858103
AT1G30530.1	miR773a	584	6	0.34235	0.886903	no	UGT78D1	miR773a:UGT78D1	0.858116
AT3G19960.2	miR398a-3p	2858	6	0.684699	0.907766	no	ATM1	miR398a-3p:ATM1	0.858116
AT3G14240.1	miR865-5p	1332	5	0.171175	0.773806	no	NA	miR865-5p:AT3G14240.1	0.858516
AT4G10710.1	miR414	3172	5	0.171175	0.695184	no	SPT16	miR414:SPT16	0.860734
AT2G48120.2	miR824-3p	587	6	0.513525	0.898395	no	PAC	miR824-3p:PAC	0.867162
AT3G49601.1	miR840-3p	859	5	0.34235	0.662218	no	NA	miR840-3p:AT3G49601.1	0.868925
AT5G50920.1	miR173-3p	1539	5	0.171175	0.695184	no	ATHSP93-V	miR173-3p:ATHSP93-V	0.868925
AT1G13220.2	miR8168	2205	5.5	0.171175	0.872481	no	CRWN2	miR8168:CRWN2	0.872843
AT1G80770.2	miR169d	807	5	0.171175	0.695184	no	PDE318	miR169d:PDE318	0.875923
AT1G20560.2	miR5654-5p	1050	5	0.34235	0.723298	no	AAE1	miR5654-5p:AAE1	0.878762
AT5G04250.2	miR838	1302	6	0.171175	0.872481	no	NA	miR838:AT5G04250.2	0.878762
AT3G04640.3	miR778	316	5.5	0.171175	0.872481	no	NA	miR778:AT3G04640.3	0.879944
AT3G15790.1	miR156i	881	4.5	0.34235	0.528366	no	ATMBD11	miR156i:ATMBD11	0.879944
AT3G27260.2	miR1886.2	818	5.5	0.171175	0.872481	no	GTE8	miR1886.2:GTE8	0.881115
AT3G51240.2	miR408-3p	430	5	0.34235	0.610653	no	F3'H	miR408-3p:F3'H	0.881115
AT4G29750.1	miR5640	1994	5	1.02705	0.855512	no	NA	miR5640:AT4G29750.1	0.881115
AT5G56000.1	miR837-5p	1653	6	0.171175	0.975756	no	AtHsp90.4	miR837-5p:AtHsp90.4	0.881115
AT3G21480.1	miR391-3p	3032	5	0.171175	0.631064	no	NA	miR391-3p:AT3G21480.1	0.884128
AT1G53070.1	miR833a-5p	666	5	0.171175	0.577773	no	NA	miR833a-5p:AT1G53070.1	0.884522
AT1G80810.2	miR414	2269	6	0.171175	0.872481	no	NA	miR414:AT1G80810.2	0.888373
AT2G36950.1	miR414	1004	6	0.171175	0.872481	no	NA	miR414:AT2G36950.1	0.888373
AT1G07210.1	miR414	857	5.5	0.171175	0.773806	no	NA	miR414:AT1G07210.1	0.890625
AT1G10720.1	miR414	1135	5.5	0.171175	0.773806	no	NA	miR414:AT1G10720.1	0.890625
AT1G70670.1	miR5021	228	5	0.171175	0.872481	no	AtCLO4	miR5021:AtCLO4	0.890625
AT2G19480.3	miR5012	1319	5.5	0.171175	0.773806	no	NAP1;2	miR5012:NAP1;2	0.890625
AT2G29580.1	miR5021	1247	5	0.171175	0.872481	no	MAC5B	miR5021:MAC5B	0.890625
AT2G46020.2	miR414	5308	5.5	0.171175	0.773806	no	ATBRM	miR414:ATBRM	0.890625
AT3G04260.1	miR414	1975	5	0.171175	0.631064	no	PDE324	miR414:PDE324	0.890625
AT3G13160.1	miR865-3p	791	6	0.171175	0.872481	no	NA	miR865-3p:AT3G13160.1	0.890625
AT3G14770.1	miR156i	1380	5.5	0.171175	0.872481	no	AtSWEET2	miR156i:AtSWEET2	0.890625
AT3G24490.1	miR414	937	5.5	0.171175	0.773806	no	NA	miR414:AT3G24490.1	0.890625
AT3G43960.1	miR5654-5p	485	6	0.171175	0.872481	no	NA	miR5654-5p:AT3G43960.1	0.890625
AT3G58110.2	miR414	979	5.5	0.855874	0.783267	no	NA	miR414:AT3G58110.2	0.890625
AT3G62940.3	miR5642a	645	6	0.171175	0.872481	no	NA	miR5642a:AT3G62940.3	0.890625
AT4G18580.2	miR858a	321	6	0.171175	0.872481	no	NA	miR858a:AT4G18580.2	0.890625
AT5G46915.1	miR414	844	5.5	0.171175	0.773806	no	NA	miR414:AT5G46915.1	0.890625
AT5G51010.1	miR413	526	6	0.171175	0.872481	no	NA	miR413:AT5G51010.1	0.890625
AT5G61030.1	miR4221	25	5.5	0.171175	0.773806	no	GR-RBP3	miR4221:GR-RBP3	0.890625
AT3G58680.1	miR869.1	101	5	0.34235	0.610653	no	ATMBF1B	miR869.1:ATMBF1B	0.893045
AT4G34920.1	miR5665	938	5	0.171175	0.695184	no	NA	miR5665:AT4G34920.1	0.893045
AT2G40430.3	miR773b-3p	766	5	0.171175	0.532783	no	NA	miR773b-3p:AT2G40430.3	0.897382
AT2G32950.1	miR837-5p	540	6	0.171175	0.872481	no	ATCOP1	miR837-5p:ATCOP1	0.899257
AT2G23940.1	miR396b-5p	664	5.5	0.171175	0.773806	no	NA	miR396b-5p:AT2G23940.1	0.899973
AT1G20370.1	miR5014b	645	5	0.171175	0.631064	no	NA	miR5014b:AT1G20370.1	0.903197
AT5G12410.1	miR414	321	5	0.513525	0.63878	no	NA	miR414:AT5G12410.1	0.906132
AT1G20450.2	miR5632-5p	918	5	1.54057	0.574335	no	ERD10	miR5632-5p:ERD10	0.911619
AT2G29960.2	miR5632-5p	378	5	0.34235	0.566536	no	ATCYP5	miR5632-5p:ATCYP5	0.912384
AT2G33800.1	miR3434-5p	760	6	0.171175	0.872481	no	EMB3113	miR3434-5p:EMB3113	0.91366
AT5G58710.1	miR8172	706	5	0.34235	0.662218	no	ROC7	miR8172:ROC7	0.91366
AT5G01470.3	miR169a-3p	205	6	0.171175	0.872481	no	NA	miR169a-3p:AT5G01470.3	0.91424
AT3G26420.1	miR167a-3p	398	5.5	10.6128	0.790309	no	ATRZ-1A	miR167a-3p:ATRZ-1A	0.914945
AT3G26430.1	miR167a-3p	395	5.5	10.6128	0.790309	no	NA	miR167a-3p:AT3G26430.1	0.914945
AT5G13770.1	miR414	1280	5	0.34235	0.566536	no	NA	miR414:AT5G13770.1	0.914945
AT5G20350.1	miR5021	1437	5.5	0.34235	0.886903	no	TIP1	miR5021:TIP1	0.914945
AT1G20330.1	miR831-3p	739	5	0.171175	0.431889	no	CVP1	miR831-3p:CVP1	0.92271
AT2G15880.1	miR8181	1502	5.5	0.171175	0.872481	no	NA	miR8181:AT2G15880.1	0.92271
AT1G20970.1	miR847	3798	5.5	0.171175	0.695184	no	NA	miR847:AT1G20970.1	0.922878
AT1G53380.3	miR5650	1686	5	1.71175	0.48237	no	NA	miR5650:AT1G53380.3	0.922878
AT1G72650.2	miR5647	1888	6	0.171175	0.872481	no	TRFL6	miR5647:TRFL6	0.922878
AT3G11170.1	miR5021	270	5.5	0.171175	0.872481	no	AtFAD7	miR5021:AtFAD7	0.922878
AT3G16850.1	miR170-3p	1465	5.5	0.171175	0.773806	no	NA	miR170-3p:AT3G16850.1	0.922878
AT3G17185.2	miR390a-5p	619	5	0.171175	0.577773	yes	TAS3a	miR390a-5p:TAS3a	0.922878
AT3G51150.2	miR166a-5p	835	5.5	0.171175	0.773806	no	NA	miR166a-5p:AT3G51150.2	0.922878
AT4G16070.2	miR4221	1978	5	0.171175	0.406246	no	NA	miR4221:AT4G16070.2	0.922878
AT4G16470.1	miR167c-5p	1117	6	0.171175	0.872481	no	NA	miR167c-5p:AT4G16470.1	0.922878
AT4G32040.1	miR1886.3	877	5.5	0.171175	0.773806	no	KNAT5	miR1886.3:KNAT5	0.922878
AT5G14740.5	miR159b-5p	1243	5.5	0.171175	0.773806	no	BETA CA2	miR159b-5p:BETA CA2	0.922878
AT5G16730.1	miR157c-3p	2352	5.5	0.684699	0.766392	no	NA	miR157c-3p:AT5G16730.1	0.922878
AT5G20890.1	miR5663-5p	866	6	0.171175	0.872481	no	NA	miR5663-5p:AT5G20890.1	0.922878
AT5G40490.1	miR4227	1194	5	0.171175	0.532783	no	NA	miR4227:AT5G40490.1	0.922878
AT1G11940.1	miR5016	865	6	0.171175	0.872481	no	NA	miR5016:AT1G11940.1	0.923203
AT3G22320.1	miR5021	57	4	0.171175	0.460989	no	ATRPABC24.3	miR5021:ATRPABC24.3	0.923203
AT1G64950.1	miR157c-3p	1253	5.5	0.34235	0.723298	no	CYP89A5	miR157c-3p:CYP89A5	0.923705
AT3G19650.1	miR165a-5p	337	5	0.171175	0.631064	no	NA	miR165a-5p:AT3G19650.1	0.925696
AT5G01350.1	miR156j	459	4.5	0.34235	0.359032	no	NA	miR156j:AT5G01350.1	0.925696
AT4G35580.3	miR839-5p	1610	5.5	0.171175	0.773806	no	CBNAC	miR839-5p:CBNAC	0.928775
AT1G21920.1	miR8170-5p	1202	5.5	0.171175	0.872481	no	NA	miR8170-5p:AT1G21920.1	0.934734
AT1G53210.1	miR852	1134	6	0.171175	0.872481	no	NA	miR852:AT1G53210.1	0.939175
AT1G03530.1	miR847	853	5.5	0.171175	0.773806	no	ATNAF1	miR847:ATNAF1	0.940303
AT5G65670.2	miR390a-3p	939	5.5	1.88292	0.808079	no	IAA9	miR390a-3p:IAA9	0.940303
AT5G61040.1	miR837-5p	2230	5	0.171175	0.431889	no	NA	miR837-5p:AT5G61040.1	0.941537
AT1G06410.1	miR406	1883	5.5	0.171175	0.773806	no	ATTPS7	miR406:ATTPS7	0.942633
AT1G74560.3	miR414	827	5	1.02705	0.476693	no	NRP1	miR414:NRP1	0.942633
AT2G14740.2	miR2111a-3p	557	5.5	0.183157	0.772117	no	ATVSR3	miR2111a-3p:ATVSR3	0.942633
AT3G19910.1	miR8183	449	6	0.171175	0.872481	no	NA	miR8183:AT3G19910.1	0.942633
AT4G03290.1	miR414	389	5	1.71175	0.468116	no	NA	miR414:AT4G03290.1	0.942633
AT5G38650.1	miR866-3p	315	6	0.171175	0.872481	no	NA	miR866-3p:AT5G38650.1	0.942633
AT5G38660.2	miR866-3p	1157	6	0.171175	0.872481	no	APE1	miR866-3p:APE1	0.942633
AT4G16270.1	miR472-3p	568	6	0.171175	0.773806	no	NA	miR472-3p:AT4G16270.1	0.946522
AT2G16710.3	miR866-3p	455	5	0.513525	0.595742	no	NA	miR866-3p:AT2G16710.3	0.949457
AT5G67385.1	miR867	1477	5.5	0.171175	0.773806	no	NA	miR867:AT5G67385.1	0.949457
AT1G78140.1	miR5635a	316	5.5	0.171175	0.773806	no	NA	miR5635a:AT1G78140.1	0.949845
AT1G34320.1	miR1886.2	682	6	0.171175	0.872481	no	NA	miR1886.2:AT1G34320.1	0.951894
AT2G35620.2	miR5652	2133	6	0.171175	0.872481	no	FEI2	miR5652:FEI2	0.951894
AT3G56800.1	miR837-5p	536	5	0.171175	0.363125	no	ACAM-3	miR837-5p:ACAM-3	0.951894
AT2G29420.1	miR865-5p	335	5.5	0.171175	0.773806	no	ATGSTU7	miR865-5p:ATGSTU7	0.953296
AT3G50690.1	miR414	577	5.5	0.684699	0.711023	no	NA	miR414:AT3G50690.1	0.953296
AT4G33080.2	miR164b-3p	867	5	0.513525	0.404816	no	NA	miR164b-3p:AT4G33080.2	0.953296
AT4G17090.1	miR5645a	1469	5	0.171175	0.494292	no	AtBAM3	miR5645a:AtBAM3	0.953919
AT5G55660.1	miR414	693	5	1.3694	0.421472	no	NA	miR414:AT5G55660.1	0.953952
AT1G02090.3	miR5648-5p	438	5	0.855874	0.236508	no	ATCSN7	miR5648-5p:ATCSN7	0.956555
AT1G04250.1	miR847	591	6	0.171175	0.773806	no	AXR3	miR847:AXR3	0.956555
AT1G68560.1	miR5650	2677	5	3.08115	0.124279	no	ATXYL1	miR5650:ATXYL1	0.956555
AT1G77800.2	miR5641	140	6	0.171175	0.872481	no	NA	miR5641:AT1G77800.2	0.956555
AT3G01530.1	miR5654-3p	973	6	0.171175	0.872481	no	ATMYB57	miR5654-3p:ATMYB57	0.956555
AT3G02820.1	miR5633	574	5.5	0.171175	0.773806	no	NA	miR5633:AT3G02820.1	0.956555
AT3G27160.1	miR1886.1	90	6	0.171175	0.872481	no	GHS1	miR1886.1:GHS1	0.956555
AT3G27810.1	miR858a	499	5	0.513525	0.306567	no	ATMYB21	miR858a:ATMYB21	0.956555
AT4G24690.1	miR837-5p	2196	5.5	0.171175	0.695184	no	AtNBR1	miR837-5p:AtNBR1	0.956555
AT4G27410.3	miR156f-3p	834	6	0.171175	0.773806	no	ANAC072	miR156f-3p:ANAC072	0.956555
AT5G02830.1	miR870-3p	1911	5.5	0.171175	0.695184	no	NA	miR870-3p:AT5G02830.1	0.956555
AT5G11850.1	miR5658	2924	6	0.171175	0.872481	no	NA	miR5658:AT5G11850.1	0.956555
AT5G58270.1	miR5638b	2046	5.5	0.34235	0.723298	no	ABCB25	miR5638b:ABCB25	0.956555
AT1G15810.1	miR413	1239	6	0.513525	0.898395	no	NA	miR413:AT1G15810.1	0.956939
AT1G21600.2	miR414	245	6	0.171175	0.872481	no	PTAC6	miR414:PTAC6	0.956939
AT2G04570.1	miR834	401	5	0.171175	0.406246	no	NA	miR834:AT2G04570.1	0.956939
AT2G11910.2	miR837-5p	371	5.5	5.30642	0.803674	no	NA	miR837-5p:AT2G11910.2	0.956939
AT2G18730.1	miR826a	1317	5.5	0.171175	0.773806	no	ATDGK3	miR826a:ATDGK3	0.956939
AT2G24500.1	miR414	592	5.5	0.171175	0.773806	no	FZF	miR414:FZF	0.956939
AT3G20640.1	miR5643a	1358	5	0.171175	0.171728	no	NA	miR5643a:AT3G20640.1	0.956939
AT3G26560.1	miR414	606	5.5	0.171175	0.773806	no	NA	miR414:AT3G26560.1	0.956939
AT3G27260.2	miR414	2540	6	0.34235	0.886903	no	GTE8	miR414:GTE8	0.956939
AT3G50060.1	miR779.1	849	6	0.34235	0.886903	no	MYB77	miR779.1:MYB77	0.956939
AT3G54670.3	miR837-5p	951	6	0.34235	0.886903	no	ATSMC1	miR837-5p:ATSMC1	0.956939
AT3G57660.1	miR865-3p	4109	6	0.171175	0.872481	no	NRPA1	miR865-3p:NRPA1	0.956939
AT3G58690.1	miR396a-5p	777	5.5	0.171175	0.773806	no	NA	miR396a-5p:AT3G58690.1	0.956939
AT4G14760.1	miR172d-5p	5156	5	0.34235	0.465622	no	NET1B	miR172d-5p:NET1B	0.956939
AT4G33080.2	miR4221	316	6	0.171175	0.872481	no	NA	miR4221:AT4G33080.2	0.956939
AT4G38430.1	miR397a	1701	5.5	1.02705	0.797872	no	ATROPGEF1	miR397a:ATROPGEF1	0.956939
AT5G07350.2	miR773a	2848	6	0.171175	0.872481	no	AtTudor1	miR773a:AtTudor1	0.956939
AT5G27300.2	miR824-3p	536	6	0.171175	0.872481	no	NA	miR824-3p:AT5G27300.2	0.956939
AT5G28740.1	miR414	1003	6	0.171175	0.872481	no	NA	miR414:AT5G28740.1	0.956939
AT5G36890.2	miR414	1316	6	0.171175	0.872481	no	BGLU42	miR414:BGLU42	0.956939
AT5G47520.1	miR396b-5p	1041	5.5	0.171175	0.773806	no	AtRABA5a	miR396b-5p:AtRABA5a	0.956939
AT2G27020.1	miR5012	124	6	0.171175	0.872481	no	PAG1	miR5012:PAG1	0.958051
AT3G01610.1	miR396b-5p	2542	6	0.171175	0.872481	no	CDC48C	miR396b-5p:CDC48C	0.958051
AT3G02820.1	miR3434-5p	591	5.5	0.171175	0.773806	no	NA	miR3434-5p:AT3G02820.1	0.958051
AT3G13470.1	miR5012	1294	6	0.171175	0.872481	no	Cpn60beta2	miR5012:Cpn60beta2	0.958051
AT4G17620.3	miR4239	340	6	0.171175	0.872481	no	NA	miR4239:AT4G17620.3	0.958051
AT4G35320.1	miR2938	469	5.5	0.171175	0.773806	no	NA	miR2938:AT4G35320.1	0.958051
AT5G12480.2	miR773b-3p	1338	6	0.171175	0.872481	no	CPK7	miR773b-3p:CPK7	0.958051
AT1G47970.1	miR414	263	5	2.56762	0.342559	no	NA	miR414:AT1G47970.1	0.961311
AT2G40460.1	miR8166	1325	6	0.171175	0.872481	no	NA	miR8166:AT2G40460.1	0.961784
AT3G05670.1	miR164b-3p	891	6	0.171175	0.773806	no	NA	miR164b-3p:AT3G05670.1	0.962948
AT5G61330.1	miR414	360	6	0.513525	0.815532	no	NA	miR414:AT5G61330.1	0.962948
AT1G02010.2	miR447c-5p	910	6	0.171175	0.872481	no	SEC1A	miR447c-5p:SEC1A	0.965457
AT4G20980.4	miR5651	1477	5.5	0.171175	0.695184	no	NA	miR5651:AT4G20980.4	0.96625
AT1G26120.1	miR168b-3p	1571	6	0.171175	0.872481	no	ICME-LIKE1	miR168b-3p:ICME-LIKE1	0.967826
AT3G03880.1	miR167a-3p	656	6	0.171175	0.872481	no	NA	miR167a-3p:AT3G03880.1	0.967826
AT3G46030.1	miR4243	261	5.5	0.340638	0.795773	no	HTB11	miR4243:HTB11	0.967826
AT3G29075.1	miR842	423	5	0.684699	0.0336085	no	NA	miR842:AT3G29075.1	0.970425
AT1G01300.1	miR5021	169	6	0.171175	0.872481	no	NA	miR5021:AT1G01300.1	0.97064
AT3G14810.2	miR865-3p	1043	5.5	0.171175	0.631064	no	MSL5	miR865-3p:MSL5	0.97064
AT3G51950.2	miR5021	472	6	0.171175	0.872481	no	NA	miR5021:AT3G51950.2	0.97064
AT4G16500.1	miR8165	186	5	0.171175	0.532783	no	NA	miR8165:AT4G16500.1	0.97064
AT4G25730.1	miR865-3p	2220	6	1.19822	0.810628	no	NA	miR865-3p:AT4G25730.1	0.97064
AT4G28570.1	miR5021	596	6	0.171175	0.872481	no	NA	miR5021:AT4G28570.1	0.97064
AT5G03905.1	miR5021	260	6	0.171175	0.872481	no	NA	miR5021:AT5G03905.1	0.97064
AT5G18610.2	miR835-5p	1880	5.5	0.171175	0.631064	no	NA	miR835-5p:AT5G18610.2	0.97064
AT1G33360.1	miR845a	1626	6	0.171175	0.872481	no	NA	miR845a:AT1G33360.1	0.97156
AT1G49300.2	miR3434-5p	515	6	0.171175	0.872481	no	ATRAB7	miR3434-5p:ATRAB7	0.97156
AT3G62010.2	miR835-5p	3849	5.5	0.171175	0.695184	no	NA	miR835-5p:AT3G62010.2	0.97156
AT4G14760.1	miR838	5258	5.5	0.171175	0.695184	no	NET1B	miR838:NET1B	0.97156
AT4G19160.3	miR417	862	5	0.171175	0.0825905	no	NA	miR417:AT4G19160.3	0.97156
AT3G58660.1	miR414	1016	5.5	0.34235	0.723298	no	NA	miR414:AT3G58660.1	0.97298
AT5G11740.1	miR5020b	190	5	0.34235	0.662218	no	AGP15	miR5020b:AGP15	0.97298
AT5G36790.3	miR1886.1	130	5.5	0.171175	0.773806	no	NA	miR1886.1:AT5G36790.3	0.976954
AT5G36150.1	miR171b-3p	1720	6	0.171175	0.872481	no	ATPEN3	miR171b-3p:ATPEN3	0.977707
AT2G16600.2	miR773b-5p	405	5	0.34235	0.566536	no	ROC3	miR773b-5p:ROC3	0.978802
AT3G23810.1	miR408-5p	709	5	0.171175	0.577773	no	ATSAHH2	miR408-5p:ATSAHH2	0.978802
AT2G35680.1	miR414	1517	5.5	0.171175	0.631064	no	NA	miR414:AT2G35680.1	0.979061
AT5G13140.1	miR5642a	344	6	0.34235	0.796789	no	NA	miR5642a:AT5G13140.1	0.979061
AT1G01950.3	miR414	1421	5.5	0.171175	0.695184	no	ARK2	miR414:ARK2	0.979962
AT3G56990.1	miR414	2048	5.5	0.171175	0.695184	no	EDA7	miR414:EDA7	0.979962
AT5G48240.3	miR172b-5p	665	6	0.171175	0.872481	no	NA	miR172b-5p:AT5G48240.3	0.979962
AT1G04590.2	miR5998a	1209	5.5	0.34235	0.662218	no	NA	miR5998a:AT1G04590.2	0.980254
AT1G20300.1	miR400	1373	5.5	0.171175	0.695184	no	NA	miR400:AT1G20300.1	0.980254
AT3G02930.2	miR5654-5p	1874	6	0.171175	0.773806	no	NA	miR5654-5p:AT3G02930.2	0.980254
AT4G27690.2	miR773b-3p	529	6	0.171175	0.773806	no	VPS26B	miR773b-3p:VPS26B	0.980254
AT5G24590.2	miR833a-3p	1540	5.5	0.171175	0.695184	no	ANAC091	miR833a-3p:ANAC091	0.980254
AT4G16830.3	miR842	739	6	0.171175	0.773806	no	NA	miR842:AT4G16830.3	0.981534
AT2G31280.4	miR776	2591	5.5	0.171175	0.695184	no	CPUORF7	miR776:CPUORF7	0.982084
AT3G12610.1	miR3932a	1000	6	0.171175	0.872481	no	DRT100	miR3932a:DRT100	0.982084
AT5G56360.1	miR776	2115	5.5	0.684699	0.711023	no	PSL4	miR776:PSL4	0.982084
AT1G61900.3	miR854a	1474	6	0.171175	0.872481	no	NA	miR854a:AT1G61900.3	0.982495
AT1G03910.2	miR831-3p	339	5.5	0.171175	0.577773	no	NA	miR831-3p:AT1G03910.2	0.982603
AT2G04620.1	miR5650	2300	5.5	0.34235	0.723298	no	NA	miR5650:AT2G04620.1	0.983342
AT1G62480.1	miR838	473	5.5	0.171175	0.577773	no	NA	miR838:AT1G62480.1	0.984746
AT2G32260.1	miR5595a	846	6	0.171175	0.773806	no	ATCCT1	miR5595a:ATCCT1	0.984746
AT3G11964.1	miR5637	5412	6	0.171175	0.773806	no	NA	miR5637:AT3G11964.1	0.984746
AT3G55000.1	miR5647	593	5.5	0.171175	0.631064	no	TON1	miR5647:TON1	0.984746
AT4G27340.1	miR5662	474	5.5	0.171175	0.695184	no	NA	miR5662:AT4G27340.1	0.984983
AT1G16890.3	miR5998a	491	5.5	1.02705	0.703124	no	UBC13B	miR5998a:UBC13B	0.985742
AT2G32765.1	miR5656	131	5.5	0.171175	0.631064	no	ATSUMO5	miR5656:ATSUMO5	0.985789
AT2G41870.1	miR858b	605	6	0.171175	0.773806	no	NA	miR858b:AT2G41870.1	0.985789
AT3G11710.1	miR780.1	1042	5.5	0.34235	0.662218	no	ATKRS-1	miR780.1:ATKRS-1	0.985789
AT4G19640.1	miR156f-3p	742	5.5	0.513525	0.524997	no	ARA-7	miR156f-3p:ARA-7	0.985789
AT5G18600.1	miR414	204	5.5	0.171175	0.577773	no	NA	miR414:AT5G18600.1	0.985789
AT1G64880.1	miR865-3p	664	5.5	0.34235	0.662218	no	NA	miR865-3p:AT1G64880.1	0.990905
AT3G12480.1	miR848	379	6	0.171175	0.872481	no	NF-YC11	miR848:NF-YC11	0.990905
AT3G29185.2	miR862-3p	1006	6	0.171175	0.872481	no	NA	miR862-3p:AT3G29185.2	0.990905
AT4G37910.1	miR5640	1398	5.5	0.34235	0.723298	no	mtHsc70-1	miR5640:mtHsc70-1	0.991019
AT1G22200.2	miR172b-5p	985	6	0.34235	0.796789	no	NA	miR172b-5p:AT1G22200.2	0.993177
AT1G49300.2	miR165a-5p	464	5.5	0.171175	0.631064	no	ATRAB7	miR165a-5p:ATRAB7	0.993177
AT3G07220.1	miR414	584	5.5	0.34235	0.566536	no	AtFHA2	miR414:AtFHA2	0.993177
AT3G27550.1	miR414	1339	5.5	0.34235	0.566536	no	NA	miR414:AT3G27550.1	0.993177
AT4G03430.1	miR775	1620	6	0.171175	0.773806	no	EMB2770	miR775:EMB2770	0.993177
AT1G64628.1	miR5644	940	6	0.171175	0.872481	no	CPuORF57	miR5644:CPuORF57	0.995411
AT1G64630.1	miR5644	940	6	0.171175	0.872481	no	ATWNK10	miR5644:ATWNK10	0.995411
AT4G02920.2	miR156g	1283	5.5	0.171175	0.773806	no	NA	miR156g:AT4G02920.2	0.995411
AT1G44750.3	miR157d	953	6	0.171175	0.872481	no	ATPUP11	miR157d:ATPUP11	0.995793
AT4G26230.1	miR398a-3p	115	5.5	0.171175	0.631064	no	NA	miR398a-3p:AT4G26230.1	0.995793
AT4G33630.2	miR1886.2	1106	6	0.171175	0.872481	no	EX1	miR1886.2:EX1	0.995793
AT4G35160.1	miR868-3p	1147	6	0.34235	0.796789	no	NA	miR868-3p:AT4G35160.1	0.998124
AT1G01080.2	miR447c-3p	513	5.5	0.171175	0.0628616	no	NA	miR447c-3p:AT1G01080.2	0.999871
AT1G02205.3	miR774b-3p	1614	6	0.255051	0.41094	no	CER1	miR774b-3p:CER1	0.999871
AT1G02305.1	miR5014b	956	6	4.27937	0.0783106	no	NA	miR5014b:AT1G02305.1	0.999871
AT1G02560.1	miR5998a	928	6	0.171175	0.773806	no	CLPP5	miR5998a:CLPP5	0.999871
AT1G04410.1	miR171c-5p	666	6	2.0541	0.597882	no	c-NAD-MDH1	miR171c-5p:c-NAD-MDH1	0.999871
AT1G05260.1	miR2933a	941	6	0.34235	0.495012	no	RCI3	miR2933a:RCI3	0.999871
AT1G06420.2	miR858a	170	6	1.19822	0.562209	no	NA	miR858a:AT1G06420.2	0.999871
AT1G06720.1	miR414	2026	6	0.513525	0.104217	no	NA	miR414:AT1G06720.1	0.999871
AT1G07920.1	miR861-5p	491	6	0.0855874	0.613227	no	NA	miR861-5p:AT1G07920.1	0.999871
AT1G07940.2	miR861-5p	622	6	0.0855874	0.613227	no	NA	miR861-5p:AT1G07940.2	0.999871
AT1G09200.1	miR4221	102	6	0.171175	0.406246	no	NA	miR4221:AT1G09200.1	0.999871
AT1G10850.1	miR837-5p	2217	6	0.171175	0.631064	no	NA	miR837-5p:AT1G10850.1	0.999871
AT1G11910.1	miR172d-5p	1558	6	0.34235	0.328915	no	APA1	miR172d-5p:APA1	0.999871
AT1G12080.2	miR4221	353	5.5	3.08115	0.262455	no	NA	miR4221:AT1G12080.2	0.999871
AT1G12080.2	miR838	461	5.5	0.34235	0.17488	no	NA	miR838:AT1G12080.2	0.999871
AT1G12500.1	miR865-3p	1349	6	0.171175	0.406246	no	NA	miR865-3p:AT1G12500.1	0.999871
AT1G12520.3	miR398a-3p	820	6	0.855874	0.474652	no	ATCCS	miR398a-3p:ATCCS	0.999871
AT1G13640.1	miR447a-3p	1739	6	0.171175	0.631064	no	NA	miR447a-3p:AT1G13640.1	0.999871
AT1G14060.1	miR414	353	6	0.171175	0.494292	no	NA	miR414:AT1G14060.1	0.999871
AT1G14320.2	miR447c-3p	453	6	0.171175	0.431889	no	RPL10	miR447c-3p:RPL10	0.999871
AT1G15340.2	miR773a	736	6	0.684699	0.472219	no	MBD10	miR773a:MBD10	0.999871
AT1G15500.1	miR172e-3p	1904	6	0.171175	0.631064	no	ATNTT2	miR172e-3p:ATNTT2	0.999871
AT1G15940.1	miR830-5p	2482	6	0.171175	0.577773	no	NA	miR830-5p:AT1G15940.1	0.999871
AT1G17745.2	miR839-5p	1917	6	3.25232	0.541905	no	PGDH	miR839-5p:PGDH	0.999871
AT1G20693.3	miR414	583	5.5	0.684699	0.260081	no	HMG BETA 1	miR414:HMG BETA 1	0.999871
AT1G20696.3	miR5021	160	5	0.171175	0.577773	no	HMGB3	miR5021:HMGB3	0.999871
AT1G21160.1	miR397b	2512	6	0.171175	0.773806	no	NA	miR397b:AT1G21160.1	0.999871
AT1G21900.1	miR839-5p	569	6	0.171175	0.532783	no	p24delta5	miR839-5p:p24delta5	0.999871
AT1G22020.1	miR865-3p	1186	6	0.171175	0.532783	no	SHM6	miR865-3p:SHM6	0.999871
AT1G22400.1	miR157a-3p	1371	6	0.34235	0.495012	no	ATUGT85A1	miR157a-3p:ATUGT85A1	0.999871
AT1G22640.1	miR164c-3p	613	6	3.76585	0.570042	no	ATMYB3	miR164c-3p:ATMYB3	0.999871
AT1G25450.1	miR5658	1374	5.5	0.171175	0.631064	no	CER60	miR5658:CER60	0.999871
AT1G30230.2	miR5021	834	5	0.171175	0.27542	no	eEF-1Bb1	miR5021:eEF-1Bb1	0.999871
AT1G31910.2	miR413	1839	6	0.171175	0.27542	no	NA	miR413:AT1G31910.2	0.999871
AT1G34418.1	miR5628	200	5.5	0.171175	0.577773	no	NA	miR5628:AT1G34418.1	0.999871
AT1G42960.1	miR447a.2-3p	70	6	0.171175	0.229274	no	NA	miR447a.2-3p:AT1G42960.1	0.999871
AT1G48920.1	miR414	1280	5.5	0.513525	0.44562	no	ATNUC-L1	miR414:ATNUC-L1	0.999871
AT1G51805.2	miR835-5p	2010	6	0.171175	0.344823	no	NA	miR835-5p:AT1G51805.2	0.999871
AT1G52300.1	miR778	330	6	7.36052	0.251968	no	NA	miR778:AT1G52300.1	0.999871
AT1G54340.1	miR773a	1079	6	0.171175	0.631064	no	ICDH	miR773a:ICDH	0.999871
AT1G55860.2	miR414	6752	6	0.34235	0.662218	no	UPL1	miR414:UPL1	0.999871
AT1G60160.1	miR773b-3p	2203	5.5	0.34235	0.465622	no	NA	miR773b-3p:AT1G60160.1	0.999871
AT1G60940.2	miR858a	1020	6	0.684699	0.247025	no	SNRK2-10	miR858a:SNRK2-10	0.999871
AT1G60950.1	miR773b-3p	423	5.5	0.171175	0.313249	no	ATFD2	miR773b-3p:ATFD2	0.999871
AT1G64500.1	miR4239	896	6	0.513525	0.746664	no	NA	miR4239:AT1G64500.1	0.999871
AT1G64770.3	miR2111a-5p	848	6	0.171175	0.631064	no	NDF2	miR2111a-5p:NDF2	0.999871
AT1G65230.1	miR5640	883	5.5	0.171175	0.127075	no	NA	miR5640:AT1G65230.1	0.999871
AT1G66070.2	miR774b-3p	271	6	0.171175	0.577773	no	NA	miR774b-3p:AT1G66070.2	0.999871
AT1G66240.3	miR5020a	57	6	0.684699	0.253385	no	ATATX1	miR5020a:ATATX1	0.999871
AT1G68010.2	miR5646	1243	5.5	0.171175	0.149251	no	ATHPR1	miR5646:ATHPR1	0.999871
AT1G70290.1	miR8170-3p	2146	6	0.171175	0.494292	no	ATTPS8	miR8170-3p:ATTPS8	0.999871
AT1G70320.1	miR414	6364	6	0.34235	0.566536	no	UPL2	miR414:UPL2	0.999871
AT1G71500.1	miR5021	313	6	0.34235	0.495012	no	NA	miR5021:AT1G71500.1	0.999871
AT1G72750.1	miR5996	445	6	0.171175	0.773806	no	ATTIM23-2	miR5996:ATTIM23-2	0.999871
AT1G73200.1	miR5663-5p	2199	5.5	0.34235	0.528366	no	NA	miR5663-5p:AT1G73200.1	0.999871
AT1G73230.1	miR157a-3p	238	5.5	0.171175	0.494292	no	NA	miR157a-3p:AT1G73230.1	0.999871
AT1G73840.1	miR5663-5p	1170	6	0.171175	0.202174	no	ESP1	miR5663-5p:ESP1	0.999871
AT1G74840.2	miR5998a	394	5.5	0.171175	0.532783	no	NA	miR5998a:AT1G74840.2	0.999871
AT1G74920.2	miR403-5p	548	6	0.171175	0.344823	no	ALDH10A8	miR403-5p:ALDH10A8	0.999871
AT1G76490.1	miR781a	1146	5.5	1.02705	0.56818	no	AtHMGR1	miR781a:AtHMGR1	0.999871
AT1G76880.1	miR414	1814	6	0.171175	0.108876	no	NA	miR414:AT1G76880.1	0.999871
AT1G76890.2	miR847	1687	6	0.171175	0.631064	no	AT-GT2	miR847:AT-GT2	0.999871
AT1G77090.1	miR157a-3p	321	6	0.171175	0.286972	no	NA	miR157a-3p:AT1G77090.1	0.999871
AT1G79830.4	miR773a	3055	6	0.684699	0.621259	no	GC5	miR773a:GC5	0.999871
AT2G03667.1	miR156i	259	6	0.171175	0.773806	no	NA	miR156i:AT2G03667.1	0.999871
AT2G04570.1	miR774b-3p	984	6	0.513525	0.329409	no	NA	miR774b-3p:AT2G04570.1	0.999871
AT2G06210.1	miR846-5p	1449	6	0.171175	0.27542	no	ELF8	miR846-5p:ELF8	0.999871
AT2G07360.2	miR837-5p	2732	6	0.513525	0.688523	no	NA	miR837-5p:AT2G07360.2	0.999871
AT2G10940.2	miR862-5p	726	6	0.171175	0.695184	no	NA	miR862-5p:AT2G10940.2	0.999871
AT2G14660.1	miR838	259	5.5	0.171175	0.214873	no	NA	miR838:AT2G14660.1	0.999871
AT2G16890.2	miR773a	1241	6	1.19822	0.368577	no	NA	miR773a:AT2G16890.2	0.999871
AT2G16940.3	miR847	334	6	0.171175	0.406246	no	NA	miR847:AT2G16940.3	0.999871
AT2G17190.1	miR5662	1924	5.5	0.171175	0.532783	no	NA	miR5662:AT2G17190.1	0.999871
AT2G18160.1	miR5633	829	5.5	0.513525	0.116585	no	ATBZIP2	miR5633:ATBZIP2	0.999871
AT2G18162.1	miR5633	829	5.5	0.513525	0.116585	no	CPuORF1	miR5633:CPuORF1	0.999871
AT2G19730.3	miR8168	455	6	0.513525	0.387094	no	NA	miR8168:AT2G19730.3	0.999871
AT2G21790.1	miR838	2624	6	0.171175	0.532783	no	ATRNR1	miR838:ATRNR1	0.999871
AT2G22795.1	miR4221	656	6	1.3694	0.4665	no	NA	miR4221:AT2G22795.1	0.999871
AT2G22795.1	miR4221	722	6	0.684699	0.341238	no	NA	miR4221:AT2G22795.1	0.999871
AT2G23290.1	miR414	867	6	1.71175	0.418636	no	AtMYB70	miR414:AtMYB70	0.999871
AT2G23390.1	miR447a.2-3p	794	6	0.171175	0.773806	no	NA	miR447a.2-3p:AT2G23390.1	0.999871
AT2G30432.1	miR158a-5p	486	5.5	1.02705	0.496686	no	TCL1	miR158a-5p:TCL1	0.999871
AT2G31670.1	miR396b-5p	685	5.5	0.171175	0.460989	no	NA	miR396b-5p:AT2G31670.1	0.999871
AT2G32760.2	miR5998a	923	6	0.171175	0.577773	no	NA	miR5998a:AT2G32760.2	0.999871
AT2G35490.1	miR399c-5p	1185	6	0.513525	0.63878	no	NA	miR399c-5p:AT2G35490.1	0.999871
AT2G36530.1	miR414	723	5.5	0.684699	0.496018	no	ENO2	miR414:ENO2	0.999871
AT2G37400.1	miR838	729	6	0.34235	0.528366	no	NA	miR838:AT2G37400.1	0.999871
AT2G41430.5	miR3434-5p	702	5.5	0.34235	0.528366	no	CID1	miR3434-5p:CID1	0.999871
AT2G41500.1	miR5645a	1726	6	0.171175	0.185712	no	EMB2776	miR5645a:EMB2776	0.999871
AT2G41890.1	miR416	1996	5.5	0.171175	0.406246	no	NA	miR416:AT2G41890.1	0.999871
[truncated: 160 more rows]

## Sheet: SRX283760
Target transcript	miRNA	miRNA slice site position in target transcript	Allen score of sRNA:target duplex	Slice site RPM	Slice site RPM + 1/Maximum adjacent site RPM + 1	Previously verified by 5' RACE?	Target gene common name	Interaction name	P-value adjusted for multiple testing
[truncated: 1,383 more rows]

[truncated: 6 more sheets: SRX384362, SRX1429178, SRX1429179, SRX1559792, SRX1980216, SRX1980220]
