# Supplementary material for: NanoPARE: parallel analysis of RNA 5′ ends from low-input RNA
Source: Genome Res. 2018 Dec;28(12):1931–42. doi: 10.1101/gr.239202.118 (PMC6280765; doi:10.1101/gr.239202.118)
Supplement: Supplemental Material [file supp_gr.239202.118_Supplemental_Data_S8.xlsx]

## Sheet: GSM278334
Supplemental Data S8. tasiRNA cleavage sites identified from publicly available unmasked degradome/PARE libraries
RPM: Reads per million transcriptome-mapping reads
Target transcript	tasiRNA	tasiRNA slice site position in target transcript	Allen score of sRNA:target duplex	Slice site RPM	Slice site RPM + 1/Maximum adjacent site RPM + 1	Previously verified by 5' RACE?	Target gene common name	Interaction name	P-value adjusted for multiple testing
AT1G63855.3	TAS3C-5'D10[-]	146	4.5	2.01079	3.01079	no	NA	TAS3C-5'D10[-]:AT1G63855.3	0
AT1G68600.1	TAS2-3'D1[+]	1178	4.5	1.88219	2.88219	no	NA	TAS2-3'D1[+]:AT1G68600.1	0
AT4G29770.2	TAS1A-3'D6[+]	780	3	3.07464	4.07464	yes	NA	TAS1A-3'D6[+]:AT4G29770.2	0
AT5G18040.1	TAS1A-3'D2[+]	685	2	60.2419	27.7849	yes	NA	TAS1A-3'D2[+]:AT5G18040.1	0
AT1G70690.1	TAS3B-5'D1[+]	863	4.5	3.96313	2.99946	no	HWI1	TAS3B-5'D1[+]:HWI1	0.495817
AT1G71030.1	TAS1C-3'D1[+]	737	4	1.13399	2.13399	no	ATMYBL2	TAS1C-3'D1[+]:ATMYBL2	0.495817
AT4G31340.2	TAS3C-5'D4[-]	1692	2	0.876798	0.576361	no	NA	TAS3C-5'D4[-]:AT4G31340.2	0.495817
AT5G23400.1	TAS1A-3'D7[+]	2138	5.5	1.69514	2.69514	no	NA	TAS1A-3'D7[+]:AT5G23400.1	0.495817
AT2G19110.1	TAS1A-3'D9[-]	2223	4.5	1.21583	2.21583	no	ATHMA4	TAS1A-3'D9[-]:ATHMA4	0.693557
AT2G43340.1	TAS4-3'D6[+]	643	3.5	1.29766	0.911849	no	NA	TAS4-3'D6[+]:AT2G43340.1	0.693557
AT5G02120.1	TAS2-3'D5[+]	339	6	2.98111	3.98111	no	OHP	TAS2-3'D5[+]:OHP	0.778071
AT5G61480.1	TAS1A-3'D8[-]	3076	5.5	1.55486	2.55486	no	PXY	TAS1A-3'D8[-]:PXY	0.930536
AT4G29020.2	TAS4-3'D5[+]	639	4	1.39119	1.00491	no	NA	TAS4-3'D5[+]:AT4G29020.2	0.933981
AT1G02500.2	TAS3B-5'D7[-]	1326	6	6.60521	0.951722	no	AtSAM1	TAS3B-5'D7[-]:AtSAM1	0.999372
AT1G07320.4	TAS1B-3'D4[-]	853	6	1.04047	0.713748	no	EMB2784	TAS1B-3'D4[-]:EMB2784	0.999372
AT1G09770.1	TAS3A-5'D8[+]	2825	6	0.841726	0.2742	no	ATCDC5	TAS3A-5'D8[+]:ATCDC5	0.999372
AT1G12090.1	TAS4-3'D7[+]	784	5.5	8.51079	0.167756	no	ELP	TAS4-3'D7[+]:ELP	0.999372
AT1G18360.1	TAS1C-3'D10[-]	1209	5.5	1.15737	1.01652	no	NA	TAS1C-3'D10[-]:AT1G18360.1	0.999372
AT1G18540.1	TAS4-3'D8[+]	728	4.5	3.42536	0.206678	no	NA	TAS4-3'D8[+]:AT1G18540.1	0.999372
AT1G20450.2	TAS3C-5'D8[+]	1337	6	1.21583	0.268264	no	ERD10	TAS3C-5'D8[+]:ERD10	0.999372
AT1G21090.1	TAS3A-5'D4[-]	1068	5.5	1.1223	0.598074	no	NA	TAS3A-5'D4[-]:AT1G21090.1	0.999372
AT1G23860.4	TAS3B-5'D7[-]	1467	6	1.41457	0.630578	no	At-RSZ21	TAS3B-5'D7[-]:At-RSZ21	0.999372
AT1G23980.1	TAS2-3'D3[-]	1191	5.5	0.830036	0.45172	no	NA	TAS2-3'D3[-]:AT1G23980.1	0.999372
AT1G24260.3	TAS3B-5'D7[-]	1038	5	3.26169	0.100023	no	AGL9	TAS3B-5'D7[-]:AGL9	0.999372
AT1G24764.1	TAS1A-3'D1[+]	2414	4	1.08723	0.491113	no	ATMAP70-2	TAS1A-3'D1[+]:ATMAP70-2	0.999372
AT1G34350.2	TAS3B-5'D1[-]	809	6	1.33273	0.873106	no	NA	TAS3B-5'D1[-]:AT1G34350.2	0.999372
AT1G48860.2	TAS1C-3'D7[-]	1764	5.5	1.80036	0.673735	no	NA	TAS1C-3'D7[-]:AT1G48860.2	0.999372
AT1G56280.2	TAS3B-5'D7[+]	853	5.5	0.642985	0.110788	no	ATDI19	TAS3B-5'D7[+]:ATDI19	0.999372
AT1G63160.1	TAS4-3'D6[-]	996	4	0.783273	0.530498	no	EMB2811	TAS4-3'D6[-]:EMB2811	0.999372
AT1G70290.1	TAS3B-5'D9[-]	2986	5	1.41457	0.919836	no	ATTPS8	TAS3B-5'D9[-]:ATTPS8	0.999372
AT1G70700.2	TAS1C-3'D5[-]	1014	6	0.607913	0.214055	no	JAZ9	TAS1C-3'D5[-]:JAZ9	0.999372
AT1G74050.1	TAS4-3'D8[+]	822	4.5	0.210432	0.251589	no	NA	TAS4-3'D8[+]:AT1G74050.1	0.999372
AT1G74060.1	TAS4-3'D8[+]	771	4.5	0.91187	0.328036	no	NA	TAS4-3'D8[+]:AT1G74060.1	0.999372
AT1G75940.1	TAS2-3'D3[+]	1613	6	1.20414	0.319808	no	ATA27	TAS2-3'D3[+]:ATA27	0.999372
AT1G76660.1	TAS1B-3'D8[-]	1839	4.5	0.946942	0.864962	no	NA	TAS1B-3'D8[-]:AT1G76660.1	0.999372
AT1G76810.1	TAS3B-5'D9[-]	4210	6	0.888489	0.530437	no	NA	TAS3B-5'D9[-]:AT1G76810.1	0.999372
AT1G79650.4	TAS3C-5'D2[+]	1538	5.5	1.1223	0.88755	no	AtAO1	TAS3C-5'D2[+]:AtAO1	0.999372
AT1G80000.2	TAS1B-3'D10[-]	2378	6	0.759892	0.148969	no	NA	TAS1B-3'D10[-]:AT1G80000.2	0.999372
AT2G02760.1	TAS2-3'D6[+]	773	5	0.73651	0.306556	no	ATUBC2	TAS2-3'D6[+]:ATUBC2	0.999372
AT2G16485.1	TAS2-3'D9[-]	5525	5.5	0.794964	0.39928	no	NERD	TAS2-3'D9[-]:NERD	0.999372
AT2G17020.1	TAS3C-5'D4[-]	2139	4	0.666367	0.350615	no	NA	TAS3C-5'D4[-]:AT2G17020.1	0.999372
AT2G21660.2	TAS4-3'D2[-]	542	5.5	20.8678	0.0372687	no	ATGRP7	TAS4-3'D2[-]:ATGRP7	0.999372
AT2G22840.1	TAS3B-5'D9[-]	1740	5.5	1.42626	0.945339	no	AtGRF1	TAS3B-5'D9[-]:AtGRF1	0.999372
AT2G28000.1	TAS3C-5'D8[-]	2074	6	2.36151	0.322158	no	CH-CPN60A	TAS3C-5'D8[-]:CH-CPN60A	0.999372
AT2G31360.1	TAS3B-5'D9[+]	1005	6	0.865108	0.30415	no	ADS2	TAS3B-5'D9[+]:ADS2	0.999372
AT2G35240.1	TAS1A-3'D9[+]	800	5.5	0.946942	0.458104	no	MORF6	TAS1A-3'D9[+]:MORF6	0.999372
AT2G36160.1	TAS1B-3'D4[-]	536	5.5	1.88219	0.757325	no	NA	TAS1B-3'D4[-]:AT2G36160.1	0.999372
AT2G37630.1	TAS3C-5'D3[-]	1380	6	1.30935	0.58872	no	AS1	TAS3C-5'D3[-]:AS1	0.999372
AT2G39770.2	TAS4-3'D10[-]	1243	6	0.654676	0.132709	no	CYT1	TAS4-3'D10[-]:CYT1	0.999372
AT2G40205.1	TAS3B-5'D9[-]	105	4	4.51259	0.0952692	no	NA	TAS3B-5'D9[-]:AT2G40205.1	0.999372
AT2G41290.1	TAS3C-5'D10[+]	1046	4.5	1.0054	0.552392	no	SSL2	TAS3C-5'D10[+]:SSL2	0.999372
AT2G41790.1	TAS3B-5'D2[+]	2827	4	1.32104	0.846505	no	NA	TAS3B-5'D2[+]:AT2G41790.1	0.999372
AT2G45960.3	TAS1B-3'D4[+]	1185	6	1.05216	0.35	no	ATHH2	TAS1B-3'D4[+]:ATHH2	0.999372
AT2G46820.2	TAS3B-5'D9[-]	803	4.5	0.91187	0.26655	no	PSAP	TAS3B-5'D9[-]:PSAP	0.999372
AT2G47940.2	TAS3C-5'D2[+]	2205	5.5	1.30935	0.45355	no	DEG2	TAS3C-5'D2[+]:DEG2	0.999372
AT3G04400.2	TAS3C-5'D8[+]	574	5.5	20.2365	0.29207	no	emb2171	TAS3C-5'D8[+]:emb2171	0.999372
AT3G06760.2	TAS3C-5'D8[-]	858	6	1.0054	0.435888	no	NA	TAS3C-5'D8[-]:AT3G06760.2	0.999372
AT3G07460.2	TAS3A-5'D4[-]	963	6	1.04047	0.321708	no	NA	TAS3A-5'D4[-]:AT3G07460.2	0.999372
AT3G08920.1	TAS3C-5'D8[+]	717	4.5	1.83543	0.682173	no	NA	TAS3C-5'D8[+]:AT3G08920.1	0.999372
AT3G11510.1	TAS4-3'D9[+]	685	5.5	1.27428	0.165348	no	NA	TAS4-3'D9[+]:AT3G11510.1	0.999372
AT3G12130.1	TAS4-3'D9[-]	1060	4	1.11061	0.371831	no	NA	TAS4-3'D9[-]:AT3G12130.1	0.999372
AT3G16180.1	TAS4-3'D9[+]	1888	5	0.830036	0.39576	no	NA	TAS4-3'D9[+]:AT3G16180.1	0.999372
AT3G26935.1	TAS3C-5'D1[-]	1873	5	0.876798	0.270022	no	NA	TAS3C-5'D1[-]:AT3G26935.1	0.999372
AT3G49910.1	TAS1C-3'D6[+]	581	5	10.9658	0.341118	no	NA	TAS1C-3'D6[+]:AT3G49910.1	0.999372
AT3G51550.1	TAS2-3'D3[-]	2979	6	1.04047	0.418019	no	FER	TAS2-3'D3[-]:FER	0.999372
AT3G57290.1	TAS3C-5'D3[-]	1503	5	0.794964	0.219486	no	ATEIF3E-1	TAS3C-5'D3[-]:ATEIF3E-1	0.999372
AT3G60750.2	TAS3B-5'D7[+]	2144	5.5	1.28597	0.819735	no	NA	TAS3B-5'D7[+]:AT3G60750.2	0.999372
AT4G03260.2	TAS3C-5'D2[-]	2464	6	1.78867	1.04834	no	NA	TAS3C-5'D2[-]:AT4G03260.2	0.999372
AT4G04640.1	TAS4-3'D9[-]	1325	6	11.527	0.962283	no	ATPC1	TAS4-3'D9[-]:ATPC1	0.999372
AT4G20890.1	TAS3C-5'D9[-]	1646	4.5	0.73651	0.0904875	no	TUB9	TAS3C-5'D9[-]:TUB9	0.999372
AT4G22670.1	TAS3C-5'D3[-]	1568	4.5	7.08453	0.739978	no	AtHip1	TAS3C-5'D3[-]:AtHip1	0.999372
AT4G24290.2	TAS3C-5'D3[+]	2072	5	0.841726	0.356794	no	NA	TAS3C-5'D3[+]:AT4G24290.2	0.999372
AT4G28190.2	TAS3B-5'D7[+]	1229	6	1.4964	0.732454	no	ULT	TAS3B-5'D7[+]:ULT	0.999372
AT4G28750.1	TAS3A-5'D7[+]	329	6	3.6241	0.30021	no	PSAE-1	TAS3A-5'D7[+]:PSAE-1	0.999372
AT4G34400.1	TAS3A-5'D9[-]	1402	5	1.33273	0.403484	no	NA	TAS3A-5'D9[-]:AT4G34400.1	0.999372
AT4G34620.1	TAS1C-3'D7[-]	524	5.5	8.52248	0.276533	no	SSR16	TAS1C-3'D7[-]:SSR16	0.999372
AT4G35230.1	TAS1C-3'D7[-]	1743	5	3.7527	0.747949	no	BSK1	TAS1C-3'D7[-]:BSK1	0.999372
AT4G36050.2	TAS1B-3'D10[+]	2096	5.5	1.30935	1.45743	no	NA	TAS1B-3'D10[+]:AT4G36050.2	0.999372
AT4G39480.1	TAS3A-5'D4[-]	1539	6	0.53777	1.53777	no	CYP96A9	TAS3A-5'D4[-]:CYP96A9	0.999372
AT5G01410.1	TAS1C-3'D7[-]	1134	4.5	1.80036	0.350953	no	ATPDX1	TAS1C-3'D7[-]:ATPDX1	0.999372
AT5G03330.2	TAS1A-3'D9[-]	1135	6	1.15737	0.963451	no	NA	TAS1A-3'D9[-]:AT5G03330.2	0.999372
AT5G08410.1	TAS1C-3'D1[+]	683	6	0.596223	0.370487	no	FTRA2	TAS1C-3'D1[+]:FTRA2	0.999372
AT5G09500.1	TAS3C-5'D3[-]	604	5.5	1.32104	0.853788	no	NA	TAS3C-5'D3[-]:AT5G09500.1	0.999372
AT5G09810.1	TAS1C-3'D5[+]	1319	5.5	3.95144	0.319522	no	ACT7	TAS1C-3'D5[+]:ACT7	0.999372
AT5G10860.1	TAS3C-5'D7[-]	800	5.5	1.04047	0.152898	no	CBSX3	TAS3C-5'D7[-]:CBSX3	0.999372
AT5G14030.4	TAS1A-3'D2[-]	645	5	2.6187	0.166998	no	NA	TAS1A-3'D2[-]:AT5G14030.4	0.999372
AT5G14920.2	TAS2-3'D8[+]	1075	4.5	1.19245	0.0869226	no	NA	TAS2-3'D8[+]:AT5G14920.2	0.999372
AT5G15520.1	TAS3B-5'D7[-]	557	6	4.04496	0.772621	no	NA	TAS3B-5'D7[-]:AT5G15520.1	0.999372
AT5G20490.2	TAS1C-3'D7[-]	5028	6	1.78867	0.706701	no	ATXIK	TAS1C-3'D7[-]:ATXIK	0.999372
AT5G22120.1	TAS1B-3'D10[-]	1351	5.5	1.69514	1.20361	no	NA	TAS1B-3'D10[-]:AT5G22120.1	0.999372
AT5G24880.1	TAS3A-5'D1[+]	1047	5	0.0935251	1.09353	no	NA	TAS3A-5'D1[+]:AT5G24880.1	0.999372
AT5G28640.1	TAS2-3'D3[-]	988	5	0.73651	0.234459	no	AN3	TAS2-3'D3[-]:AN3	0.999372
AT5G28750.1	TAS1A-3'D9[-]	319	6	1.0054	0.795863	no	NA	TAS1A-3'D9[-]:AT5G28750.1	0.999372
AT5G35630.3	TAS2-3'D4[+]	1421	6	1.64838	0.214011	no	ATGSL1	TAS2-3'D4[+]:ATGSL1	0.999372
AT5G42530.1	TAS3C-5'D1[-]	333	5	1.80036	0.0408731	no	NA	TAS3C-5'D1[-]:AT5G42530.1	0.999372
AT5G47190.1	TAS1C-3'D7[+]	898	4.5	1.0054	0.369268	no	NA	TAS1C-3'D7[+]:AT5G47190.1	0.999372
AT5G47970.2	TAS3C-5'D8[-]	1557	6	0.970323	0.235871	no	NA	TAS3C-5'D8[-]:AT5G47970.2	0.999372
AT5G62000.4	TAS1B-3'D10[+]	3081	5	0.596223	0.26744	no	ARF1-BP	TAS1B-3'D10[+]:ARF1-BP	0.999372
AT5G62950.3	TAS3C-5'D6[+]	1162	4.5	0.946942	0.359277	no	NA	TAS3C-5'D6[+]:AT5G62950.3	0.999372

## Sheet: GSM278335
Target transcript	tasiRNA	tasiRNA slice site position in target transcript	Allen score of sRNA:target duplex	Slice site RPM	Slice site RPM + 1/Maximum adjacent site RPM + 1	Previously verified by 5' RACE?	Target gene common name	Interaction name	P-value adjusted for multiple testing
AT1G66390.1	TAS4-3'D4[-]	527	2	0.403213	1.40321	yes	ATMYB90	TAS4-3'D4[-]:ATMYB90	0
AT1G74600.1	TAS3A-5'D2[+]	2616	6	9.88311	10.8831	no	OTP87	TAS3A-5'D2[+]:OTP87	0
AT2G33860.1	TAS3A-5'D7[+]	1684	1.5	1.09131	1.51884	yes	ARF3	TAS3A-5'D7[+]:ARF3	0
AT5G18040.1	TAS1A-3'D2[+]	685	2	50.5858	31.0422	yes	NA	TAS1A-3'D2[+]:AT5G18040.1	0
AT5G60450.1	TAS3C-5'D5[+]	1885	1	1.8802	2.8802	yes	ARF4	TAS3C-5'D5[+]:ARF4	0
AT4G29770.2	TAS1A-3'D6[+]	780	3	10.5668	6.88776	yes	NA	TAS1A-3'D6[+]:AT4G29770.2	0.00654491
AT2G05830.4	TAS3C-5'D10[+]	487	4.5	2.71293	3.71293	no	NA	TAS3C-5'D10[+]:AT2G05830.4	0.109688
AT4G38550.1	TAS4-3'D6[-]	2031	3.5	3.51935	4.51935	no	NA	TAS4-3'D6[-]:AT4G38550.1	0.125383
AT1G22640.1	TAS2-3'D9[+]	476	5.5	11.3338	6.15567	no	ATMYB3	TAS2-3'D9[+]:ATMYB3	0.228709
AT4G33000.3	TAS1A-3'D6[-]	991	5.5	1.86267	2.86267	no	ATCBL10	TAS1A-3'D6[-]:ATCBL10	0.497141
AT5G08590.1	TAS1C-3'D6[-]	899	3.5	0.495251	0.460311	no	ASK2	TAS1C-3'D6[-]:ASK2	0.497141
AT4G22670.1	TAS3C-5'D3[-]	1568	4.5	12.2892	3.31685	no	AtHip1	TAS3C-5'D3[-]:AtHip1	0.590302
AT3G22968.1	TAS3C-5'D2[-]	1782	5	2.65157	2.68619	no	CPuORF59	TAS3C-5'D2[-]:CPuORF59	0.598131
AT3G22970.2	TAS3C-5'D2[-]	1780	5	2.65157	2.68619	no	NA	TAS3C-5'D2[-]:AT3G22970.2	0.598131
AT3G59020.2	TAS4-3'D9[-]	3608	6	1.97224	2.97224	no	NA	TAS4-3'D9[-]:AT3G59020.2	0.598131
AT5G47600.1	TAS3A-5'D8[+]	326	4.5	0.407596	1.4076	no	NA	TAS3A-5'D8[+]:AT5G47600.1	0.693221
AT5G47100.1	TAS1A-3'D7[+]	891	5.5	1.30168	2.30168	no	ATCBL9	TAS1A-3'D7[+]:ATCBL9	0.734664
AT1G24764.1	TAS1A-3'D1[+]	2414	4	0.3813	0.421816	no	ATMAP70-2	TAS1A-3'D1[+]:ATMAP70-2	0.749532
AT1G55040.1	TAS2-3'D2[+]	550	5.5	1.95471	2.95471	no	NA	TAS2-3'D2[+]:AT1G55040.1	0.749532
AT1G74470.1	TAS3B-5'D7[+]	560	5	2.59021	2.27441	no	NA	TAS3B-5'D7[+]:AT1G74470.1	0.749532
AT2G24360.1	TAS3C-5'D3[+]	1643	6	3.83053	4.83053	no	NA	TAS3C-5'D3[+]:AT2G24360.1	0.749532
AT4G04460.2	TAS1C-3'D7[-]	904	5	2.05989	2.34941	no	NA	TAS1C-3'D7[-]:AT4G04460.2	0.749532
AT4G29020.2	TAS4-3'D5[+]	639	4	4.48794	1.15923	no	NA	TAS4-3'D5[+]:AT4G29020.2	0.749532
AT1G44160.1	TAS3B-5'D1[-]	1361	6	0.876551	1.87655	no	NA	TAS3B-5'D1[-]:AT1G44160.1	0.885013
AT2G20635.1	TAS3B-5'D9[+]	667	5	0.298027	1.29803	no	NA	TAS3B-5'D9[+]:AT2G20635.1	0.885013
AT3G56860.5	TAS3A-5'D1[+]	66	5.5	0.81081	1.81081	no	UBA2A	TAS3A-5'D1[+]:UBA2A	0.885013
AT4G00570.1	TAS3A-5'D4[+]	304	6	1.84952	2.84952	no	NAD-ME2	TAS3A-5'D4[+]:NAD-ME2	0.885013
AT5G01410.1	TAS1C-3'D7[-]	1134	4.5	7.81883	0.608426	no	ATPDX1	TAS1C-3'D7[-]:ATPDX1	0.885013
AT5G12900.1	TAS3B-5'D7[-]	115	6	0.837106	1.83711	no	NA	TAS3B-5'D7[-]:AT5G12900.1	0.885013
AT5G42270.1	TAS2-3'D6[-]	740	5.5	0.889699	1.53349	no	FTSH5	TAS2-3'D6[-]:FTSH5	0.885013
AT1G12140.2	TAS3C-5'D4[-]	1441	5.5	17.8773	1.0682	no	FMO GS-OX5	TAS3C-5'D4[-]:FMO GS-OX5	0.886182
AT3G18820.1	TAS3A-5'D4[-]	175	6	0.705624	1.70562	no	ATRAB7B	TAS3A-5'D4[-]:ATRAB7B	0.886182
AT5G35450.1	TAS3A-5'D6[+]	2032	5.5	0.245434	1.24543	no	NA	TAS3A-5'D6[+]:AT5G35450.1	0.886182
AT5G48620.1	TAS3A-5'D6[+]	2476	5.5	0.245434	1.24543	no	NA	TAS3A-5'D6[+]:AT5G48620.1	0.886182
AT5G51830.1	TAS3A-5'D4[-]	1023	5.5	0.337472	1.33747	no	NA	TAS3A-5'D4[-]:AT5G51830.1	0.886182
AT1G20330.1	TAS1A-3'D2[-]	182	5.5	0.543462	0.919096	no	CVP1	TAS1A-3'D2[-]:CVP1	0.958267
AT1G20440.1	TAS3C-5'D3[+]	485	5.5	2.52447	0.928421	no	AtCOR47	TAS3C-5'D3[+]:AtCOR47	0.958267
AT1G23570.3	TAS1C-3'D5[-]	373	5.5	1.30606	0.797021	no	NA	TAS1C-3'D5[-]:AT1G23570.3	0.958267
AT2G39660.1	TAS3B-5'D8[+]	591	6	0.271731	1.27173	no	BIK1	TAS3B-5'D8[+]:BIK1	0.958267
AT4G03260.2	TAS1C-3'D4[-]	1313	6	0.688092	1.2663	no	NA	TAS1C-3'D4[-]:AT4G03260.2	0.958267
AT4G30440.1	TAS3B-5'D3[+]	1118	5.5	0.898465	0.790211	no	GAE1	TAS3B-5'D3[+]:GAE1	0.958267
AT5G14920.2	TAS2-3'D8[+]	1075	4.5	0.582906	0.10523	no	NA	TAS2-3'D8[+]:AT5G14920.2	0.958267
AT1G21780.2	TAS1A-3'D7[+]	337	6	1.51643	0.860603	no	NA	TAS1A-3'D7[+]:AT1G21780.2	0.968871
AT2G28000.1	TAS3C-5'D8[-]	2074	6	15.1731	1.23287	no	CH-CPN60A	TAS3C-5'D8[-]:CH-CPN60A	0.968871
AT2G40205.1	TAS3B-5'D9[-]	105	4	3.05478	0.0797272	no	NA	TAS3B-5'D9[-]:AT2G40205.1	0.968871
AT3G57290.1	TAS3C-5'D3[-]	1503	5	1.60409	0.536172	no	ATEIF3E-1	TAS3C-5'D3[-]:ATEIF3E-1	0.968871
AT1G12090.1	TAS4-3'D7[+]	784	5.5	1.69174	0.0497899	no	ELP	TAS4-3'D7[+]:ELP	1
AT1G24260.3	TAS3B-5'D7[-]	1038	5	3.57195	0.175258	no	AGL9	TAS3B-5'D7[-]:AGL9	1
AT1G65060.2	TAS1C-3'D7[-]	1381	6	2.22644	0.571928	no	4CL3	TAS1C-3'D7[-]:4CL3	1
AT1G65960.2	TAS3B-5'D6[+]	1452	6	0.543462	0.00156453	no	GAD2	TAS3B-5'D6[+]:GAD2	1
AT1G72260.1	TAS2-3'D3[+]	140	6	0.626734	0.0974915	no	THI2.1	TAS2-3'D3[+]:THI2.1	1
AT2G21130.1	TAS3B-5'D7[-]	699	6	0.876551	0.667793	no	NA	TAS3B-5'D7[-]:AT2G21130.1	1
AT2G21660.2	TAS4-3'D2[-]	542	5.5	32.2439	0.0455201	no	ATGRP7	TAS4-3'D2[-]:ATGRP7	1
AT2G31360.1	TAS3B-5'D9[+]	1005	6	0.201607	0.748749	no	ADS2	TAS3B-5'D9[+]:ADS2	1
AT2G37340.3	TAS4-3'D5[+]	442	6	0.60482	1.08601	no	AT-RS2Z33	TAS4-3'D5[+]:AT-RS2Z33	1
AT3G04400.2	TAS3C-5'D8[+]	574	5.5	5.20671	0.167908	no	emb2171	TAS3C-5'D8[+]:emb2171	1
AT3G06360.1	TAS3A-5'D1[-]	391	6	0.924761	0.756966	no	AGP27	TAS3A-5'D1[-]:AGP27	1
AT3G49910.1	TAS1C-3'D6[+]	581	5	1.11322	0.0375661	no	NA	TAS1C-3'D6[+]:AT3G49910.1	1
AT3G51550.1	TAS2-3'D3[-]	2979	6	0.670561	0.15313	no	FER	TAS2-3'D3[-]:FER	1
AT3G52300.2	TAS3B-5'D5[+]	377	6	0.661796	0.532414	no	ATPQ	TAS3B-5'D5[+]:ATPQ	1
AT4G11260.1	TAS1A-3'D9[-]	648	6	1.6523	0.923683	no	ATSGT1B	TAS1A-3'D9[-]:ATSGT1B	1
AT4G28750.1	TAS3A-5'D7[+]	329	6	0.972972	0.0410842	no	PSAE-1	TAS3A-5'D7[+]:PSAE-1	1
AT5G20885.1	TAS3C-5'D3[-]	614	5.5	0.990503	0.258172	no	NA	TAS3C-5'D3[-]:AT5G20885.1	1
AT5G44560.2	TAS1C-3'D5[-]	791	6	1.64353	1.39892	no	VPS2.2	TAS1C-3'D5[-]:VPS2.2	1
AT5G67470.1	TAS3B-5'D3[-]	2718	6	0.898465	1.14242	no	ATFH6	TAS3B-5'D3[-]:ATFH6	1

## Sheet: GSM280226
Target transcript	tasiRNA	tasiRNA slice site position in target transcript	Allen score of sRNA:target duplex	Slice site RPM	Slice site RPM + 1/Maximum adjacent site RPM + 1	Previously verified by 5' RACE?	Target gene common name	Interaction name	P-value adjusted for multiple testing
AT1G50055.1	TAS1A-3'D6[-]	487	0	0.514727	0.871921	no	TAS1b	TAS1A-3'D6[-]:TAS1b	0
AT2G33860.1	TAS3C-5'D5[+]	1685	1.5	1.98611	1.7068	yes	ARF3	TAS3C-5'D5[+]:ARF3	0
AT2G33860.1	TAS3C-5'D5[+]	1805	1	0.548564	1.30616	yes	ARF3	TAS3C-5'D5[+]:ARF3	0
AT5G18040.1	TAS1A-3'D2[+]	685	2	17.0506	12.0969	yes	NA	TAS1A-3'D2[+]:AT5G18040.1	0
AT5G60450.1	TAS3A-5'D8[+]	1884	1	0.929995	1.73918	yes	ARF4	TAS3A-5'D8[+]:ARF4	0
AT5G60450.1	TAS3C-5'D5[+]	2095	1.5	0.190716	0.967508	yes	ARF4	TAS3C-5'D5[+]:ARF4	0
AT5G62000.4	TAS3A-5'D7[+]	1745	1.5	12.1566	8.62159	yes	ARF1-BP	TAS3A-5'D7[+]:ARF1-BP	0
AT3G11910.2	TAS3C-5'D3[+]	1933	1	0.133296	0.469875	no	AtUBP13	TAS3C-5'D3[+]:AtUBP13	0.0293376
AT3G28315.1	TAS2-3'D4[-]	3084	6	0.904361	1.90436	no	NA	TAS2-3'D4[-]:AT3G28315.1	0.214094
AT3G17185.2	TAS3C-5'D5[-]	702	1	0.154828	0.379182	no	TAS3a	TAS3C-5'D5[-]:TAS3a	0.333053
AT5G15340.1	TAS3B-5'D7[+]	314	4	0.285048	1.28505	no	NA	TAS3B-5'D7[+]:AT5G15340.1	0.388063
AT4G26800.1	TAS1A-3'D9[-]	1070	5	0.454231	1.45423	no	NA	TAS1A-3'D9[-]:AT4G26800.1	0.399801
AT1G08800.2	TAS3C-5'D9[+]	2183	5.5	0.81413	1.81413	no	NA	TAS3C-5'D9[+]:AT1G08800.2	0.425397
AT3G55750.1	TAS3C-5'D9[-]	22	6	1.34834	1.85107	no	NA	TAS3C-5'D9[-]:AT3G55750.1	0.445768
AT2G25290.3	TAS1A-3'D7[-]	1475	4	0.547538	1.23481	no	Phox1	TAS1A-3'D7[-]:Phox1	0.461143
AT1G48380.2	TAS3B-5'D6[+]	1054	4	0.705443	1.19293	no	HYP7	TAS3B-5'D6[+]:HYP7	0.492973
AT4G10430.3	TAS1C-3'D7[-]	845	5.5	1.33296	1.482	no	NA	TAS1C-3'D7[-]:AT4G10430.3	0.492973
AT1G21980.1	TAS3C-5'D8[-]	2905	5	0.764913	1.41288	no	ATPIP5K1	TAS3C-5'D8[-]:ATPIP5K1	0.523021
AT3G51250.1	TAS4-3'D6[+]	387	4	0.380406	1.38041	no	NA	TAS4-3'D6[+]:AT3G51250.1	0.524704
AT2G27400.1	TAS1B-3'D6[-]	408	4	0.34862	1.2547	no	TAS1a	TAS1B-3'D6[-]:TAS1a	0.607539
AT4G34860.2	TAS3A-5'D6[+]	2012	4	0.28915	1.28915	no	A/N-InvB	TAS3A-5'D6[+]:A/N-InvB	0.607539
AT1G65295.1	TAS4-3'D9[+]	215	4.5	0.375279	1.37528	no	NA	TAS4-3'D9[+]:AT1G65295.1	0.619006
AT5G14620.1	TAS2-3'D1[-]	640	4	0.307606	1.16541	no	DMT7	TAS2-3'D1[-]:DMT7	0.680393
AT5G04910.1	TAS3B-5'D7[+]	56	4	0.172259	1.17226	no	NA	TAS3B-5'D7[+]:AT5G04910.1	0.703151
AT3G23370.2	TAS3B-5'D7[+]	1895	5	0.266592	1.26659	no	NA	TAS3B-5'D7[+]:AT3G23370.2	0.709145
AT4G08790.1	TAS3A-5'D1[+]	349	5	0.786446	1.27427	no	NA	TAS3A-5'D1[+]:AT4G08790.1	0.709145
AT5G44870.1	TAS3A-5'D10[+]	2399	6	0.555741	1.55574	no	LAZ5	TAS3A-5'D10[+]:LAZ5	0.709145
AT3G15750.1	TAS3B-5'D7[+]	464	4	0.0440902	1.04409	no	NA	TAS3B-5'D7[+]:AT3G15750.1	0.755741
AT1G47550.2	TAS3B-5'D7[-]	2929	3	0.113814	1.00555	no	SEC3A	TAS3B-5'D7[-]:SEC3A	0.77944
AT5G04970.1	TAS3B-5'D7[-]	78	5	0.390659	1.39066	no	NA	TAS3B-5'D7[-]:AT5G04970.1	0.77944
AT1G14060.1	TAS1A-3'D5[+]	97	4	0.207121	1.0908	no	NA	TAS1A-3'D5[+]:AT1G14060.1	0.86381
AT2G05920.1	TAS3C-5'D3[+]	2460	3	0.240958	0.309749	no	NA	TAS3C-5'D3[+]:AT2G05920.1	0.86381
AT3G53260.1	TAS4-3'D4[-]	2004	4.5	0.618288	1.21287	no	ATPAL2	TAS4-3'D4[-]:ATPAL2	0.86381
AT3G57180.1	TAS3B-5'D7[+]	1540	5	0.271719	1.27172	no	BPG2	TAS3B-5'D7[+]:BPG2	0.86381
AT4G16780.1	TAS1A-3'D9[-]	644	4.5	0.221476	1.22148	no	ATHB-2	TAS1A-3'D9[-]:ATHB-2	0.86381
AT4G17230.1	TAS3B-5'D7[+]	1570	4.5	0.248135	1.15242	no	SCL13	TAS3B-5'D7[+]:SCL13	0.86381
AT4G31340.2	TAS3C-5'D4[-]	1692	2	0.23378	0.668013	no	NA	TAS3C-5'D4[-]:AT4G31340.2	0.86381
AT5G10520.1	TAS3C-5'D1[+]	1674	6	0.513702	1.5137	no	RBK1	TAS3C-5'D1[+]:RBK1	0.86381
AT5G12840.4	TAS3B-5'D9[+]	960	5	0.427572	1.28525	no	ATHAP2A	TAS3B-5'D9[+]:ATHAP2A	0.86381
AT1G20132.1	TAS1C-3'D8[+]	1002	6	0.409116	1.40912	no	NA	TAS1C-3'D8[+]:AT1G20132.1	0.908139
AT1G21670.1	TAS3B-5'D3[+]	1763	5.5	0.315809	1.31581	no	NA	TAS3B-5'D3[+]:AT1G21670.1	0.908139
AT1G26760.1	TAS1A-3'D5[-]	679	6	0.452181	1.45218	no	ATXR1	TAS1A-3'D5[-]:ATXR1	0.908139
AT1G32750.1	TAS3A-5'D6[+]	5178	4	0.388609	0.89493	no	GTD1	TAS3A-5'D6[+]:GTD1	0.908139
AT1G43850.2	TAS3B-5'D6[+]	1985	4.5	0.2912	1.07239	no	SEU	TAS3B-5'D6[+]:SEU	0.908139
AT1G48050.1	TAS1A-3'D9[-]	1843	5	0.194817	1.19482	no	ATKU80	TAS1A-3'D9[-]:ATKU80	0.908139
AT1G78950.1	TAS4-3'D1[+]	1561	6	0.355797	1.3558	no	AtBAS	TAS4-3'D1[+]:AtBAS	0.908139
AT2G33600.1	TAS3C-5'D3[+]	846	6	0.909488	1.34921	no	AtCRL2	TAS3C-5'D3[+]:AtCRL2	0.908139
AT2G39675.1	TAS1A-3'D10[-]	492	3	0.857195	0.142944	no	TAS1c	TAS1A-3'D10[-]:TAS1c	0.908139
AT2G43650.1	TAS3C-5'D1[+]	1859	5	0.394761	1.2003	no	EMB2777	TAS3C-5'D1[+]:EMB2777	0.908139
AT2G47240.2	TAS1B-3'D3[+]	1187	5.5	1.46113	1.34449	no	CER8	TAS1B-3'D3[+]:CER8	0.908139
AT3G20620.1	TAS3C-5'D8[-]	317	4.5	0.314783	1.04311	no	NA	TAS3C-5'D8[-]:AT3G20620.1	0.908139
AT3G23210.1	TAS1C-3'D7[-]	392	4.5	0.71262	1.15488	no	bHLH34	TAS1C-3'D7[-]:bHLH34	0.908139
AT3G47340.3	TAS3C-5'D9[-]	2225	3.5	0.299403	0.957681	no	ASN1	TAS3C-5'D9[-]:ASN1	0.908139
AT3G55690.1	TAS3C-5'D2[+]	989	4.5	0.10151	1.10151	no	NA	TAS3C-5'D2[+]:AT3G55690.1	0.908139
AT4G32940.1	TAS3B-5'D2[-]	1024	3.5	0.378355	0.794829	no	GAMMA-VPE	TAS3B-5'D2[-]:GAMMA-VPE	0.908139
AT5G11110.1	TAS3B-5'D7[+]	2333	4.5	0.0799775	1.07998	no	ATSPS2F	TAS3B-5'D7[+]:ATSPS2F	0.908139
AT5G42390.1	TAS2-3'D6[-]	1135	5	0.179437	1.17944	no	SPP	TAS2-3'D6[-]:SPP	0.908139
AT5G55900.1	TAS3A-5'D4[-]	19	6	0.407065	1.37741	no	NA	TAS3A-5'D4[-]:AT5G55900.1	0.908139
AT1G18540.1	TAS4-3'D8[+]	728	4.5	4.50745	1.06483	no	NA	TAS4-3'D8[+]:AT1G18540.1	0.914447
AT1G64950.1	TAS3A-5'D4[+]	813	4	0.0451155	0.835968	no	CYP89A5	TAS3A-5'D4[+]:CYP89A5	0.914447
AT2G12190.1	TAS3A-5'D4[+]	787	4	0.052293	0.835542	no	NA	TAS3A-5'D4[+]:AT2G12190.1	0.914447
AT3G06130.2	TAS3B-5'D9[+]	633	4	0.143549	0.867057	no	NA	TAS3B-5'D9[+]:AT3G06130.2	0.914447
AT1G34570.1	TAS3B-5'D7[+]	522	4	0.0389634	0.862894	no	NA	TAS3B-5'D7[+]:AT1G34570.1	0.926074
AT1G74060.1	TAS4-3'D8[+]	771	4.5	0.937173	1.03563	no	NA	TAS4-3'D8[+]:AT1G74060.1	0.926074
AT4G10790.1	TAS3A-5'D6[+]	1076	5	0.250186	1.14888	no	NA	TAS3A-5'D6[+]:AT4G10790.1	0.926074
AT4G17550.1	TAS3C-5'D3[+]	873	5	0.500372	1.12019	no	AtG3Pp4	TAS3C-5'D3[+]:AtG3Pp4	0.926074
AT4G30620.1	TAS3C-5'D7[-]	686	4	0.636744	0.932798	no	NA	TAS3C-5'D7[-]:AT4G30620.1	0.926074
AT1G47870.2	TAS1B-3'D10[+]	768	4	0.191741	0.862686	no	ATE2F2	TAS1B-3'D10[+]:ATE2F2	0.941328
AT1G21160.1	TAS4-3'D9[+]	1465	6	0.313758	1.31376	no	NA	TAS4-3'D9[+]:AT1G21160.1	0.98954
AT3G14720.1	TAS3C-5'D10[-]	1117	6	0.324012	1.32401	no	ATMPK19	TAS3C-5'D10[-]:ATMPK19	0.992453
AT1G02190.2	TAS3A-5'D4[+]	1614	6	0.325037	0.536153	no	NA	TAS3A-5'D4[+]:AT1G02190.2	0.999975
AT1G02780.1	TAS3C-5'D8[-]	70	5.5	0.0912564	0.164309	no	emb2386	TAS3C-5'D8[-]:emb2386	0.999975
AT1G04020.2	TAS3C-5'D1[+]	1862	5.5	0.366051	0.969438	no	ATBARD1	TAS3C-5'D1[+]:ATBARD1	0.999975
AT1G04190.1	TAS4-3'D4[-]	289	5	0.102535	0.759764	no	TPR3	TAS4-3'D4[-]:TPR3	0.999975
AT1G04270.2	TAS1A-3'D5[+]	82	5	0.963832	0.697663	no	RPS15	TAS1A-3'D5[+]:RPS15	0.999975
AT1G04830.2	TAS1C-3'D6[-]	832	6	0.165082	0.796673	no	NA	TAS1C-3'D6[-]:AT1G04830.2	0.999975
AT1G06820.1	TAS3C-5'D4[+]	986	4.5	0.241983	0.794656	no	CCR2	TAS3C-5'D4[+]:CCR2	0.999975
AT1G07940.2	TAS1A-3'D8[+]	1853	6	0.713646	0.401336	no	NA	TAS1A-3'D8[+]:AT1G07940.2	0.999975
AT1G08980.1	TAS3B-5'D5[-]	1198	6	0.364	0.775998	no	AMI1	TAS3B-5'D5[-]:AMI1	0.999975
AT1G09770.1	TAS3C-5'D7[+]	2133	5	0.243009	0.85596	no	ATCDC5	TAS3C-5'D7[+]:ATCDC5	0.999975
AT1G09770.1	TAS3A-5'D8[+]	2825	6	0.182513	0.594081	no	ATCDC5	TAS3A-5'D8[+]:ATCDC5	0.999975
AT1G10490.1	TAS3C-5'D8[-]	2896	6	0.183538	0.821972	no	NA	TAS3C-5'D8[-]:AT1G10490.1	0.999975
AT1G10940.2	TAS1C-3'D5[-]	460	6	0.380406	0.626387	no	ASK1	TAS1C-3'D5[-]:ASK1	0.999975
AT1G11410.1	TAS4-3'D1[-]	1776	6	0.330164	0.839511	no	NA	TAS4-3'D1[-]:AT1G11410.1	0.999975
AT1G11820.2	TAS3C-5'D1[+]	1399	5	0.18764	0.326157	no	NA	TAS3C-5'D1[+]:AT1G11820.2	0.999975
AT1G11840.6	TAS1A-3'D9[+]	390	5.5	0.834637	0.585252	no	ATGLX1	TAS1A-3'D9[+]:ATGLX1	0.999975
AT1G11860.3	TAS3B-5'D1[+]	1447	6	0.182513	0.376238	no	NA	TAS3B-5'D1[+]:AT1G11860.3	0.999975
AT1G12000.1	TAS3A-5'D10[-]	410	5	0.0810029	0.420822	no	NA	TAS3A-5'D10[-]:AT1G12000.1	0.999975
AT1G12080.2	TAS3C-5'D8[-]	300	6	0.306581	0.350916	no	NA	TAS3C-5'D8[-]:AT1G12080.2	0.999975
AT1G12090.1	TAS4-3'D7[+]	784	5.5	0.657251	0.299794	no	ELP	TAS4-3'D7[+]:ELP	0.999975
AT1G12800.1	TAS1C-3'D7[-]	1774	6	0.987415	1.05901	no	NA	TAS1C-3'D7[-]:AT1G12800.1	0.999975
AT1G14710.2	TAS3C-5'D8[-]	2242	6	0.501398	0.678448	no	NA	TAS3C-5'D8[-]:AT1G14710.2	0.999975
AT1G15340.2	TAS3B-5'D9[+]	861	6	0.236857	0.736308	no	MBD10	TAS3B-5'D9[+]:MBD10	0.999975
AT1G17190.1	TAS3A-5'D6[+]	674	6	0.552665	0.969276	no	ATGSTU26	TAS3A-5'D6[+]:ATGSTU26	0.999975
AT1G17280.2	TAS3C-5'D3[+]	708	5	0.0933071	0.685145	no	UBC34	TAS3C-5'D3[+]:UBC34	0.999975
AT1G18070.3	TAS3C-5'D8[-]	926	4.5	0.401938	0.755703	no	NA	TAS3C-5'D8[-]:AT1G18070.3	0.999975
AT1G20670.1	TAS3B-5'D7[+]	31	5.5	0.00615212	0.801515	no	NA	TAS3B-5'D7[+]:AT1G20670.1	0.999975
AT1G20890.1	TAS3A-5'D6[+]	246	6	0.126118	0.676163	no	NA	TAS3A-5'D6[+]:AT1G20890.1	0.999975
AT1G22882.1	TAS1B-3'D4[-]	2017	5	0.252237	0.790329	no	NA	TAS1B-3'D4[-]:AT1G22882.1	0.999975
AT1G25570.1	TAS3B-5'D2[+]	2099	5.5	0.0943325	0.828453	no	NA	TAS3B-5'D2[+]:AT1G25570.1	0.999975
AT1G26460.1	TAS3C-5'D3[-]	2271	4.5	0.236857	0.58126	no	NA	TAS3C-5'D3[-]:AT1G26460.1	0.999975
AT1G30360.1	TAS2-3'D3[+]	2344	5.5	0.341443	0.650469	no	ERD4	TAS2-3'D3[+]:ERD4	0.999975
AT1G30620.3	TAS3A-5'D4[+]	1706	5.5	0.410141	0.915461	no	HSR8	TAS3A-5'D4[+]:HSR8	0.999975
AT1G31330.1	TAS3C-5'D1[+]	358	5	8.54734	0.902931	no	PSAF	TAS3C-5'D1[+]:PSAF	0.999975
AT1G33240.1	TAS1B-3'D10[+]	587	6	0.390659	0.911919	no	AT-GTL1	TAS1B-3'D10[+]:AT-GTL1	0.999975
AT1G34030.1	TAS3C-5'D2[+]	355	6	0.360924	0.519425	no	NA	TAS3C-5'D2[+]:AT1G34030.1	0.999975
AT1G34350.2	TAS3B-5'D1[-]	809	6	0.105611	0.713487	no	NA	TAS3B-5'D1[-]:AT1G34350.2	0.999975
AT1G34770.1	TAS3B-5'D10[+]	764	6	0.445003	0.959164	no	NA	TAS3B-5'D10[+]:AT1G34770.1	0.999975
AT1G36280.2	TAS3B-5'D3[+]	1061	5.5	0.154828	0.695972	no	NA	TAS3B-5'D3[+]:AT1G36280.2	0.999975
AT1G43170.9	TAS2-3'D8[-]	1172	5	1.93792	0.748646	no	ARP1	TAS2-3'D8[-]:ARP1	0.999975
AT1G43710.1	TAS3C-5'D1[-]	1563	5.5	0.379381	0.639915	no	ATSDC1	TAS3C-5'D1[-]:ATSDC1	0.999975
AT1G44110.1	TAS3A-5'D3[-]	839	4	0.318885	0.75077	no	CYCA1;1	TAS3A-5'D3[-]:CYCA1;1	0.999975
AT1G44542.1	TAS1A-3'D7[-]	197	5.5	0.424496	0.833261	no	NA	TAS1A-3'D7[-]:AT1G44542.1	0.999975
AT1G47565.1	TAS3C-5'D7[+]	311	6	0.376305	1.00978	no	NA	TAS3C-5'D7[+]:AT1G47565.1	0.999975
AT1G48630.1	TAS2-3'D4[-]	987	5	0.396812	0.66314	no	RACK1B	TAS2-3'D4[-]:RACK1B	0.999975
AT1G48920.1	TAS4-3'D9[+]	1286	6	0.0851043	0.413829	no	ATNUC-L1	TAS4-3'D9[+]:ATNUC-L1	0.999975
AT1G52280.1	TAS3A-5'D10[-]	391	6	0.100485	0.576015	no	AtRABG3d	TAS3A-5'D10[-]:AtRABG3d	0.999975
AT1G53600.1	TAS2-3'D5[+]	725	6	0.0758761	0.900453	no	NA	TAS2-3'D5[+]:AT1G53600.1	0.999975
AT1G54570.1	TAS3C-5'D4[+]	1791	5	0.562919	0.822921	no	PES1	TAS3C-5'D4[+]:PES1	0.999975
AT1G55110.1	TAS3A-5'D8[+]	1137	6	0.184564	0.755934	no	AtIDD7	TAS3A-5'D8[+]:AtIDD7	0.999975
AT1G55480.1	TAS1A-3'D9[-]	972	5	0.254288	0.735904	no	ZKT	TAS1A-3'D9[-]:ZKT	0.999975
AT1G56070.1	TAS1C-3'D6[-]	2382	5	0.296327	0.329902	no	LOS1	TAS1C-3'D6[-]:LOS1	0.999975
AT1G56110.1	TAS3C-5'D8[-]	1540	5	0.100485	0.516427	no	NOP56	TAS3C-5'D8[-]:NOP56	0.999975
AT1G58025.3	TAS3C-5'D8[-]	1301	6	0.215324	0.70751	no	NA	TAS3C-5'D8[-]:AT1G58025.3	0.999975
AT1G59910.1	TAS2-3'D3[+]	2758	5.5	0.571122	0.939312	no	NA	TAS2-3'D3[+]:AT1G59910.1	0.999975
AT1G62540.1	TAS3C-5'D3[+]	1156	6	0.0912564	0.784126	no	FMO GS-OX2	TAS3C-5'D3[+]:FMO GS-OX2	0.999975
AT1G62930.1	TAS3C-5'D3[+]	1683	4.5	0.0625465	0.872818	no	RPF3	TAS3C-5'D3[+]:RPF3	0.999975
AT1G64230.5	TAS3C-5'D9[+]	777	6	0.0943325	0.684908	no	UBC28	TAS3C-5'D9[+]:UBC28	0.999975
AT1G64330.1	TAS3C-5'D2[-]	1889	4.5	0.211223	0.625584	no	NA	TAS3C-5'D2[-]:AT1G64330.1	0.999975
AT1G65060.2	TAS1C-3'D7[-]	1381	6	0.342468	0.561373	no	4CL3	TAS1C-3'D7[-]:4CL3	0.999975
AT1G65190.1	TAS3C-5'D2[-]	1464	6	0.142524	1.14252	no	NA	TAS3C-5'D2[-]:AT1G65190.1	0.999975
AT1G65250.1	TAS3C-5'D2[-]	1370	6	0.113814	1.11381	no	NA	TAS3C-5'D2[-]:AT1G65250.1	0.999975
AT1G65440.3	TAS1B-3'D4[-]	4568	5.5	0.890006	1.11966	no	GTB1	TAS1B-3'D4[-]:GTB1	0.999975
AT1G65960.2	TAS3B-5'D6[+]	1452	6	0.396812	0.369453	no	GAD2	TAS3B-5'D6[+]:GAD2	0.999975
AT1G66330.2	TAS1A-3'D3[-]	1374	6	0.0963832	0.585495	no	NA	TAS1A-3'D3[-]:AT1G66330.2	0.999975
AT1G66350.1	TAS1C-3'D7[-]	1591	5	0.162006	0.459509	no	RGL	TAS1C-3'D7[-]:RGL	0.999975
AT1G66580.1	TAS3B-5'D7[-]	767	4	0.296327	0.298652	no	RPL10C	TAS3B-5'D7[-]:RPL10C	0.999975
AT1G67630.1	TAS1B-3'D4[+]	1803	5	0.321961	0.882295	no	EMB2814	TAS1B-3'D4[+]:EMB2814	0.999975
AT1G68560.1	TAS1A-3'D7[+]	2201	5.5	0.360924	0.352316	no	ATXYL1	TAS1A-3'D7[+]:ATXYL1	0.999975
AT1G69940.1	TAS3C-5'D2[+]	93	6	0.0635719	0.587933	no	ATPPME1	TAS3C-5'D2[+]:ATPPME1	0.999975
AT1G70700.2	TAS1C-3'D5[-]	1014	6	0.230704	0.48707	no	JAZ9	TAS1C-3'D5[-]:JAZ9	0.999975
AT1G71440.1	TAS3B-5'D5[+]	1289	4.5	1.07457	0.379439	no	PFI	TAS3B-5'D5[+]:PFI	0.999975
AT1G71710.2	TAS1B-3'D4[-]	1847	5	0.219426	0.732639	no	NA	TAS1B-3'D4[-]:AT1G71710.2	0.999975
AT1G72260.1	TAS2-3'D3[+]	140	6	0.370152	0.214687	no	THI2.1	TAS2-3'D3[+]:THI2.1	0.999975
AT1G73590.1	TAS3C-5'D1[+]	1345	5	0.0892057	0.743747	no	ATPIN1	TAS3C-5'D1[+]:ATPIN1	0.999975
AT1G74050.1	TAS4-3'D8[+]	822	4.5	0.897184	0.675955	no	NA	TAS4-3'D8[+]:AT1G74050.1	0.999975
AT1G74470.1	TAS3B-5'D7[+]	560	5	1.35244	0.489782	no	NA	TAS3B-5'D7[+]:AT1G74470.1	0.999975
AT1G75270.1	TAS1C-3'D9[+]	199	6	0.23173	0.562323	no	DHAR2	TAS1C-3'D9[+]:DHAR2	0.999975
AT1G75460.1	TAS3A-5'D6[-]	988	4.5	0.181487	0.627165	no	NA	TAS3A-5'D6[-]:AT1G75460.1	0.999975
AT1G75940.1	TAS2-3'D3[+]	1613	6	0.589578	0.522458	no	ATA27	TAS2-3'D3[+]:ATA27	0.999975
AT1G76490.1	TAS3A-5'D4[+]	2170	5	0.087155	0.494238	no	AtHMGR1	TAS3A-5'D4[+]:AtHMGR1	0.999975
AT1G77130.1	TAS3C-5'D7[+]	1994	4.5	0.0789522	0.631513	no	GUX3	TAS3C-5'D7[+]:GUX3	0.999975
AT1G78290.3	TAS1C-3'D5[-]	166	6	0.472688	0.89528	no	SNRK2-8	TAS1C-3'D5[-]:SNRK2-8	0.999975
AT1G79000.2	TAS3C-5'D3[+]	5723	4	0.100485	0.581949	no	ATHAC1	TAS3C-5'D3[+]:ATHAC1	0.999975
AT1G79050.2	TAS3C-5'D2[+]	855	5	0.0810029	0.98047	no	RECA1	TAS3C-5'D2[+]:RECA1	0.999975
AT1G79280.3	TAS3C-5'D3[+]	4701	6	0.227628	0.898669	no	AtTPR	TAS3C-5'D3[+]:AtTPR	0.999975
AT1G79640.2	TAS1A-3'D7[-]	1382	4.5	0.227628	0.923627	no	NA	TAS1A-3'D7[-]:AT1G79640.2	0.999975
AT1G80000.2	TAS1B-3'D10[-]	2378	6	1.36167	1.11147	no	NA	TAS1B-3'D10[-]:AT1G80000.2	0.999975
AT1G80000.2	TAS3C-5'D10[+]	357	5.5	0.00102535	0.611596	no	NA	TAS3C-5'D10[+]:AT1G80000.2	0.999975
AT1G80270.3	TAS3C-5'D4[+]	1637	4.5	0.115865	0.630053	no	PPR596	TAS3C-5'D4[+]:PPR596	0.999975
AT1G80850.1	TAS3C-5'D8[-]	1247	6	0.292226	0.743405	no	NA	TAS3C-5'D8[-]:AT1G80850.1	0.999975
AT2G01070.2	TAS3C-5'D3[+]	1675	5.5	0.213273	0.784002	no	NA	TAS3C-5'D3[+]:AT2G01070.2	0.999975
AT2G01350.4	TAS1A-3'D7[-]	944	5	0.451155	0.944602	no	QPT	TAS1A-3'D7[-]:QPT	0.999975
AT2G02360.1	TAS3B-5'D10[+]	637	5	0.157904	0.648161	no	AtPP2-B10	TAS3B-5'D10[+]:AtPP2-B10	0.999975
AT2G03740.1	TAS3B-5'D1[+]	301	5.5	0.366051	0.721211	no	NA	TAS3B-5'D1[+]:AT2G03740.1	0.999975
AT2G04030.2	TAS1B-3'D10[+]	1259	6	0.581375	0.592664	no	AtHsp90.5	TAS1B-3'D10[+]:AtHsp90.5	0.999975
AT2G11910.2	TAS3C-5'D3[-]	669	4	0.229679	0.498809	no	NA	TAS3C-5'D3[-]:AT2G11910.2	0.999975
AT2G16900.3	TAS2-3'D6[-]	1506	6	0.281972	0.850368	no	NA	TAS2-3'D6[-]:AT2G16900.3	0.999975
AT2G17420.1	TAS2-3'D2[-]	462	5.5	0.854119	0.711841	no	ATNTRA	TAS2-3'D2[-]:ATNTRA	0.999975
AT2G17840.1	TAS1A-3'D3[-]	614	5.5	0.925894	1.11917	no	ERD7	TAS1A-3'D3[-]:ERD7	0.999975
AT2G17890.1	TAS4-3'D6[+]	1518	5.5	0.115865	0.67166	no	CPK16	TAS4-3'D6[+]:CPK16	0.999975
AT2G18020.1	TAS3C-5'D10[-]	425	6	0.329138	0.342	no	EMB2296	TAS3C-5'D10[-]:EMB2296	0.999975
AT2G18630.1	TAS4-3'D6[+]	1579	6	0.531133	0.785407	no	NA	TAS4-3'D6[+]:AT2G18630.1	0.999975
AT2G19310.1	TAS1A-3'D7[-]	23	5.5	0.382457	1.02743	no	NA	TAS1A-3'D7[-]:AT2G19310.1	0.999975
AT2G19480.3	TAS3A-5'D1[+]	1195	5.5	0.403989	0.591153	no	NAP1;2	TAS3A-5'D1[+]:NAP1;2	0.999975
AT2G19930.1	TAS1C-3'D9[-]	1423	6	0.0963832	0.83065	no	NA	TAS1C-3'D9[-]:AT2G19930.1	0.999975
AT2G20340.1	TAS3B-5'D7[-]	1310	6	0.0840789	0.757211	no	AAS	TAS3B-5'D7[-]:AAS	0.999975
AT2G20890.1	TAS4-3'D2[+]	206	6	0.0943325	0.425501	no	PSB29	TAS4-3'D2[+]:PSB29	0.999975
AT2G21130.1	TAS3B-5'D7[-]	699	6	0.209172	0.554099	no	NA	TAS3B-5'D7[-]:AT2G21130.1	0.999975
AT2G21530.1	TAS3C-5'D9[-]	125	6	0.28915	0.767907	no	NA	TAS3C-5'D9[-]:AT2G21530.1	0.999975
AT2G21660.2	TAS4-3'D2[-]	542	5.5	2.33883	0.235735	no	ATGRP7	TAS4-3'D2[-]:ATGRP7	0.999975
AT2G22080.1	TAS3B-5'D9[+]	441	5.5	0.150727	0.534856	no	NA	TAS3B-5'D9[+]:AT2G22080.1	0.999975
AT2G22795.1	TAS3B-5'D9[+]	1697	5.5	0.0963832	0.543531	no	NA	TAS3B-5'D9[+]:AT2G22795.1	0.999975
AT2G24020.2	TAS1C-3'D1[-]	269	5	0.349645	0.80938	no	NA	TAS1C-3'D1[-]:AT2G24020.2	0.999975
AT2G24200.3	TAS3A-5'D1[-]	777	6	0.106637	0.480047	no	LAP1	TAS3A-5'D1[-]:LAP1	0.999975
AT2G24360.1	TAS3C-5'D3[+]	1643	6	0.281972	0.617639	no	NA	TAS3C-5'D3[+]:AT2G24360.1	0.999975
AT2G25840.3	TAS3B-5'D7[+]	1261	4	0.105611	0.541772	no	OVA4	TAS3B-5'D7[+]:OVA4	0.999975
AT2G27400.1	TAS1C-3'D5[-]	555	4.5	0.123042	0.541873	no	TAS1a	TAS1C-3'D5[-]:TAS1a	0.999975
AT2G27490.2	TAS3C-5'D3[+]	296	4.5	0.183538	0.694395	no	ATCOAE	TAS3C-5'D3[+]:ATCOAE	0.999975
AT2G28910.1	TAS3B-5'D7[+]	560	5.5	0.385533	0.465431	no	CXIP4	TAS3B-5'D7[+]:CXIP4	0.999975
AT2G28910.1	TAS3B-5'D7[+]	809	6	0.0779268	0.385609	no	CXIP4	TAS3B-5'D7[+]:CXIP4	0.999975
AT2G29210.1	TAS3B-5'D6[-]	1936	5.5	0.0943325	0.60528	no	NA	TAS3B-5'D6[-]:AT2G29210.1	0.999975
AT2G29210.1	TAS3C-5'D9[+]	384	6	0.290175	0.967699	no	NA	TAS3C-5'D9[+]:AT2G29210.1	0.999975
AT2G29570.1	TAS1C-3'D6[-]	542	5	0.527031	0.745653	no	ATPCNA2	TAS1C-3'D6[-]:ATPCNA2	0.999975
AT2G30050.1	TAS1C-3'D6[-]	181	6	0.311707	0.848171	no	NA	TAS1C-3'D6[-]:AT2G30050.1	0.999975
AT2G30570.1	TAS3B-5'D7[+]	263	6	4.20702	0.729817	no	PSBW	TAS3B-5'D7[+]:PSBW	0.999975
AT2G33150.1	TAS3B-5'D7[-]	1589	5	0.270693	0.576869	no	KAT2	TAS3B-5'D7[-]:KAT2	0.999975
AT2G33500.2	TAS3C-5'D3[+]	571	6	0.109713	0.685733	no	BBX12	TAS3C-5'D3[+]:BBX12	0.999975
AT2G33590.1	TAS3C-5'D3[+]	1093	5	0.191741	0.651764	no	AtCRL1	TAS3C-5'D3[+]:AtCRL1	0.999975
AT2G35880.1	TAS1A-3'D9[-]	640	6	0.415268	0.654384	no	NA	TAS1A-3'D9[-]:AT2G35880.1	0.999975
AT2G36160.1	TAS1B-3'D4[-]	536	5.5	0.495245	0.404035	no	NA	TAS1B-3'D4[-]:AT2G36160.1	0.999975
AT2G36800.1	TAS1B-3'D4[-]	674	5.5	0.216349	0.700166	no	DOGT1	TAS1B-3'D4[-]:DOGT1	0.999975
AT2G37630.1	TAS3C-5'D3[-]	1380	6	0.293251	0.87028	no	AS1	TAS3C-5'D3[-]:AS1	0.999975
AT2G38170.3	TAS1A-3'D7[-]	104	6	0.0810029	0.582384	no	ATCAX1	TAS1A-3'D7[-]:ATCAX1	0.999975
AT2G38880.8	TAS3B-5'D7[+]	527	6	0.206096	0.751962	no	ATHAP3	TAS3B-5'D7[+]:ATHAP3	0.999975
AT2G39675.1	TAS1A-3'D10[-]	631	4	0.828485	0.207641	no	TAS1c	TAS1A-3'D10[-]:TAS1c	0.999975
AT2G39730.3	TAS2-3'D8[-]	283	5	2.57364	0.63377	no	RCA	TAS2-3'D8[-]:RCA	0.999975
AT2G39770.2	TAS4-3'D10[-]	1243	6	0.88488	0.802644	no	CYT1	TAS4-3'D10[-]:CYT1	0.999975
AT2G40205.1	TAS3B-5'D9[-]	105	4	2.66489	0.452767	no	NA	TAS3B-5'D9[-]:AT2G40205.1	0.999975
AT2G40840.1	TAS3B-5'D7[+]	2693	5.5	0.375279	0.686329	no	DPE2	TAS3B-5'D7[+]:DPE2	0.999975
AT2G41460.2	TAS3B-5'D9[+]	468	5.5	0.115865	0.947748	no	ARP	TAS3B-5'D9[+]:ARP	0.999975
AT2G41905.1	TAS4-3'D9[+]	92	6	0.201995	0.188916	no	NA	TAS4-3'D9[+]:AT2G41905.1	0.999975
AT2G42590.3	TAS1B-3'D8[-]	433	4.5	0.225578	0.440529	no	GF14 MU	TAS1B-3'D8[-]:GF14 MU	0.999975
AT2G44140.2	TAS3A-5'D10[+]	1412	6	0.820282	0.731084	no	NA	TAS3A-5'D10[+]:AT2G44140.2	0.999975
AT2G44670.1	TAS4-3'D5[+]	731	4.5	0.414243	0.347313	no	NA	TAS4-3'D5[+]:AT2G44670.1	0.999975
AT2G44730.1	TAS3C-5'D6[+]	1200	5.5	0.239933	0.753314	no	NA	TAS3C-5'D6[+]:AT2G44730.1	0.999975
AT2G45770.2	TAS3C-5'D3[+]	395	6	0.206096	0.569273	no	CPFTSY	TAS3C-5'D3[+]:CPFTSY	0.999975
AT2G46000.1	TAS3B-5'D6[+]	717	5	0.488068	1.01753	no	NA	TAS3B-5'D6[+]:AT2G46000.1	0.999975
AT2G47070.1	TAS1C-3'D7[-]	2058	6	0.310682	0.800786	no	SPL1	TAS1C-3'D7[-]:SPL1	0.999975
AT3G02080.1	TAS1C-3'D7[-]	447	5	0.33324	0.504908	no	NA	TAS1C-3'D7[-]:AT3G02080.1	0.999975
AT3G02630.1	TAS3C-5'D2[-]	1440	5	0.191741	0.742063	no	NA	TAS3C-5'D2[-]:AT3G02630.1	0.999975
AT3G03800.1	TAS3B-5'D7[+]	583	6	0.182513	0.809728	no	ATSYP131	TAS3B-5'D7[+]:ATSYP131	0.999975
AT3G03940.1	TAS3B-5'D1[+]	2271	5	0.0933071	0.66506	no	NA	TAS3B-5'D1[+]:AT3G03940.1	0.999975
AT3G04400.2	TAS3C-5'D8[+]	574	5.5	0.244034	0.149009	no	emb2171	TAS3C-5'D8[+]:emb2171	0.999975
AT3G04520.2	TAS1A-3'D7[-]	1042	6	0.248135	0.736726	no	THA2	TAS1A-3'D7[-]:THA2	0.999975
AT3G04920.1	TAS3A-5'D8[+]	255	5	4.63972	0.712907	no	NA	TAS3A-5'D8[+]:AT3G04920.1	0.999975
AT3G05060.1	TAS3C-5'D3[+]	1690	6	0.347595	0.601699	no	NA	TAS3C-5'D3[+]:AT3G05060.1	0.999975
AT3G08510.3	TAS1A-3'D7[-]	1515	6	0.0953578	0.624622	no	ATPLC2	TAS1A-3'D7[-]:ATPLC2	0.999975
AT3G08530.1	TAS1B-3'D8[-]	4613	6	0.17431	0.473005	no	NA	TAS1B-3'D8[-]:AT3G08530.1	0.999975
AT3G09860.1	TAS3A-5'D4[-]	455	4	0.112789	0.507072	no	NA	TAS3A-5'D4[-]:AT3G09860.1	0.999975
AT3G10230.2	TAS1A-3'D7[-]	904	6	0.206096	0.609382	no	AtLCY	TAS1A-3'D7[-]:AtLCY	0.999975
AT3G11100.1	TAS3C-5'D4[+]	336	5	0.0953578	0.683357	no	NA	TAS3C-5'D4[+]:AT3G11100.1	0.999975
AT3G11510.1	TAS4-3'D9[+]	685	5.5	1.53085	0.615794	no	NA	TAS4-3'D9[+]:AT3G11510.1	0.999975
AT3G13870.2	TAS3B-5'D5[+]	1944	5.5	0.347595	0.671826	no	GOM8	TAS3B-5'D5[+]:GOM8	0.999975
AT3G14890.2	TAS1B-3'D4[-]	1316	4.5	0.216349	0.532851	no	NA	TAS1B-3'D4[-]:AT3G14890.2	0.999975
AT3G16170.1	TAS1B-3'D9[-]	1409	5.5	0.758761	0.745358	no	AAE13	TAS1B-3'D9[-]:AAE13	0.999975
AT3G16180.1	TAS4-3'D9[+]	1888	5	0.107662	0.461405	no	NA	TAS4-3'D9[+]:AT3G16180.1	0.999975
AT3G16340.2	TAS3C-5'D9[+]	3767	5	0.18969	0.743635	no	ABCG29	TAS3C-5'D9[+]:ABCG29	0.999975
AT3G21670.1	TAS1B-3'D2[+]	297	6	0.215324	0.823522	no	NA	TAS1B-3'D2[+]:AT3G21670.1	0.999975
AT3G24100.1	TAS3C-5'D2[+]	156	6	0.087155	0.690159	no	NA	TAS3C-5'D2[+]:AT3G24100.1	0.999975
AT3G24490.1	TAS3B-5'D7[+]	706	5	0.517803	0.826842	no	NA	TAS3B-5'D7[+]:AT3G24490.1	0.999975
AT3G25290.2	TAS4-3'D7[+]	1246	4	0.113814	0.624915	no	NA	TAS4-3'D7[+]:AT3G25290.2	0.999975
AT3G25410.1	TAS4-3'D7[-]	1600	6	0.706468	1.09328	no	NA	TAS4-3'D7[-]:AT3G25410.1	0.999975
AT3G27820.1	TAS3C-5'D4[+]	1325	6	0.36195	0.663053	no	ATMDAR4	TAS3C-5'D4[+]:ATMDAR4	0.999975
AT3G28730.1	TAS3C-5'D3[+]	1610	5.5	0.256338	0.542812	no	ATHMG	TAS3C-5'D3[+]:ATHMG	0.999975
AT3G42790.1	TAS1C-3'D1[+]	438	5.5	0.429623	0.836762	no	AL3	TAS1C-3'D1[+]:AL3	0.999975
AT3G42950.1	TAS1B-3'D9[-]	1295	5.5	0.822333	1.08089	no	NA	TAS1B-3'D9[-]:AT3G42950.1	0.999975
AT3G44790.1	TAS2-3'D4[-]	493	6	0.0922818	1.09228	no	NA	TAS2-3'D4[-]:AT3G44790.1	0.999975
AT3G46980.3	TAS1A-3'D1[+]	700	6	0.661353	1.10729	no	PHT4;3	TAS1A-3'D1[+]:PHT4;3	0.999975
AT3G48930.1	TAS3B-5'D9[+]	175	5.5	0.28915	0.402937	no	EMB1080	TAS3B-5'D9[+]:EMB1080	0.999975
AT3G49910.1	TAS1C-3'D6[+]	581	5	0.550614	0.209913	no	NA	TAS1C-3'D6[+]:AT3G49910.1	0.999975
AT3G51550.1	TAS2-3'D3[-]	2979	6	0.183538	0.503329	no	FER	TAS2-3'D3[-]:FER	0.999975
AT3G51840.1	TAS3A-5'D9[+]	354	6	0.241983	0.457729	no	ACX4	TAS3A-5'D9[+]:ACX4	0.999975
AT3G51980.1	TAS1B-3'D8[+]	1417	5.5	1.55238	1.1757	no	NA	TAS1B-3'D8[+]:AT3G51980.1	0.999975
AT3G52300.2	TAS3B-5'D5[+]	377	6	0.360924	0.352223	no	ATPQ	TAS3B-5'D5[+]:ATPQ	0.999975
AT3G52570.1	TAS2-3'D9[-]	640	5	0.298378	0.684371	no	NA	TAS2-3'D9[-]:AT3G52570.1	0.999975
AT3G53500.2	TAS3B-5'D7[+]	732	4	0.0994592	0.296596	no	At-RS2Z	TAS3B-5'D7[+]:At-RS2Z	0.999975
AT3G54050.2	TAS3B-5'D7[+]	1280	5.5	0.442952	0.485388	no	HCEF1	TAS3B-5'D7[+]:HCEF1	0.999975
AT3G55430.1	TAS4-3'D6[+]	568	6	0.0902311	0.71252	no	NA	TAS4-3'D6[+]:AT3G55430.1	0.999975
AT3G57290.1	TAS3C-5'D3[-]	1503	5	0.955629	0.39683	no	ATEIF3E-1	TAS3C-5'D3[-]:ATEIF3E-1	0.999975
AT3G57550.2	TAS3C-5'D9[+]	915	5.5	0.087155	0.466819	no	AGK2	TAS3C-5'D9[+]:AGK2	0.999975
AT3G58090.1	TAS3C-5'D2[+]	338	5.5	0.429623	0.816667	no	NA	TAS3C-5'D2[+]:AT3G58090.1	0.999975
AT3G60260.4	TAS3A-5'D5[+]	370	6	0.225578	1.22558	no	NA	TAS3A-5'D5[+]:AT3G60260.4	0.999975
AT3G60750.2	TAS3B-5'D7[+]	2144	5.5	2.98173	0.419938	no	NA	TAS3B-5'D7[+]:AT3G60750.2	0.999975
AT3G61700.2	TAS3B-5'D6[-]	115	6	0.0943325	1.01329	no	NA	TAS3B-5'D6[-]:AT3G61700.2	0.999975
AT3G62360.1	TAS3C-5'D2[+]	3522	6	0.10151	0.660574	no	NA	TAS3C-5'D2[+]:AT3G62360.1	0.999975
AT3G62840.2	TAS3A-5'D1[+]	162	6	0.587527	0.46172	no	NA	TAS3A-5'D1[+]:AT3G62840.2	0.999975
AT3G62940.3	TAS3B-5'D7[+]	679	6	0.288124	0.805163	no	NA	TAS3B-5'D7[+]:AT3G62940.3	0.999975
AT4G01037.1	TAS3B-5'D7[+]	1416	5.5	0.562919	0.849521	no	AtWTF1	TAS3B-5'D7[+]:AtWTF1	0.999975
AT4G01330.2	TAS1A-3'D7[-]	996	6	0.0635719	0.608988	no	NA	TAS1A-3'D7[-]:AT4G01330.2	0.999975
AT4G02530.1	TAS3B-5'D9[+]	298	6	0.545488	0.440302	no	NA	TAS3B-5'D9[+]:AT4G02530.1	0.999975
AT4G04460.2	TAS1C-3'D7[-]	904	5	0.198918	0.448638	no	NA	TAS1C-3'D7[-]:AT4G04460.2	0.999975
AT4G04640.1	TAS4-3'D9[-]	1325	6	2.11633	0.62662	no	ATPC1	TAS4-3'D9[-]:ATPC1	0.999975
AT4G09010.1	TAS3B-5'D7[-]	100	5.5	0.183538	0.771432	no	APX4	TAS3B-5'D7[-]:APX4	0.999975
AT4G09160.1	TAS1A-3'D7[-]	1866	6	0.643922	1.04023	no	NA	TAS1A-3'D7[-]:AT4G09160.1	0.999975
AT4G10280.1	TAS4-3'D1[+]	263	6	0.0676733	0.926174	no	NA	TAS4-3'D1[+]:AT4G10280.1	0.999975
AT4G12420.2	TAS3B-5'D7[+]	1677	4.5	0.782344	0.59443	no	SKU5	TAS3B-5'D7[+]:SKU5	0.999975
AT4G12710.1	TAS3C-5'D7[+]	858	6	0.0758761	0.793538	no	NA	TAS3C-5'D7[+]:AT4G12710.1	0.999975
AT4G14440.1	TAS3C-5'D10[-]	278	5.5	0.105611	0.530315	no	ATECI3	TAS3C-5'D10[-]:ATECI3	0.999975
AT4G14440.1	TAS1B-3'D4[+]	57	5	0.320935	0.798546	no	ATECI3	TAS1B-3'D4[+]:ATECI3	0.999975
AT4G16155.1	TAS3B-5'D9[+]	1564	6	0.311707	0.381727	no	NA	TAS3B-5'D9[+]:AT4G16155.1	0.999975
AT4G16190.1	TAS4-3'D8[+]	577	5.5	0.173285	0.379493	no	NA	TAS4-3'D8[+]:AT4G16190.1	0.999975
AT4G16430.1	TAS2-3'D2[+]	1104	5	0.268642	0.647356	no	NA	TAS2-3'D2[+]:AT4G16430.1	0.999975
AT4G17510.1	TAS4-3'D8[-]	661	6	0.100485	0.758351	no	UCH3	TAS4-3'D8[-]:UCH3	0.999975
AT4G18480.1	TAS3B-5'D3[+]	949	4.5	0.401938	0.721793	no	CH-42	TAS3B-5'D3[+]:CH-42	0.999975
AT4G18970.2	TAS3B-5'D10[-]	824	6	0.517803	0.889976	no	NA	TAS3B-5'D10[-]:AT4G18970.2	0.999975
AT4G19400.1	TAS3A-5'D9[-]	558	5.5	0.087155	0.532995	no	NA	TAS3A-5'D9[-]:AT4G19400.1	0.999975
AT4G19410.2	TAS3A-5'D9[-]	1820	5.5	0.087155	0.532995	no	NA	TAS3A-5'D9[-]:AT4G19410.2	0.999975
AT4G19610.1	TAS4-3'D9[+]	1694	6	0.0892057	0.970757	no	NA	TAS4-3'D9[+]:AT4G19610.1	0.999975
AT4G20890.1	TAS3C-5'D9[-]	1646	4.5	0.300428	0.897401	no	TUB9	TAS3C-5'D9[-]:TUB9	0.999975
AT4G21960.1	TAS3B-5'D7[+]	600	6	0.0953578	0.454145	no	PRXR1	TAS3B-5'D7[+]:PRXR1	0.999975
AT4G22570.1	TAS3C-5'D2[+]	492	6	0.194817	0.477713	no	APT3	TAS3C-5'D2[+]:APT3	0.999975
AT4G22670.1	TAS3C-5'D3[-]	1568	4.5	0.0851043	0.38146	no	AtHip1	TAS3C-5'D3[-]:AtHip1	0.999975
AT4G24780.2	TAS3A-5'D9[+]	73	5	0.177386	0.966338	no	NA	TAS3A-5'D9[+]:AT4G24780.2	0.999975
AT4G25370.1	TAS3B-5'D10[+]	775	5	0.598806	0.679046	no	NA	TAS3B-5'D10[+]:AT4G25370.1	0.999975
AT4G25730.1	TAS3B-5'D7[+]	2386	6	0.311707	0.852125	no	NA	TAS3B-5'D7[+]:AT4G25730.1	0.999975
AT4G26070.3	TAS1A-3'D4[+]	1192	6	0.259414	0.658848	no	ATMEK1	TAS1A-3'D4[+]:ATMEK1	0.999975
AT4G26190.1	TAS4-3'D3[+]	2024	5.5	0.113814	0.651136	no	NA	TAS4-3'D3[+]:AT4G26190.1	0.999975
AT4G26630.2	TAS3C-5'D3[+]	836	6	0.412192	0.685118	no	NA	TAS3C-5'D3[+]:AT4G26630.2	0.999975
AT4G26630.2	TAS3B-5'D9[+]	969	6	0.0851043	0.602911	no	NA	TAS3B-5'D9[+]:AT4G26630.2	0.999975
AT4G26900.1	TAS3B-5'D7[+]	1314	5	0.469612	0.723776	no	AT-HF	TAS3B-5'D7[+]:AT-HF	0.999975
AT4G27900.2	TAS3C-5'D2[+]	877	6	0.488068	0.998624	no	NA	TAS3C-5'D2[+]:AT4G27900.2	0.999975
AT4G28706.4	TAS3C-5'D8[-]	720	5.5	0.10151	0.605472	no	NA	TAS3C-5'D8[-]:AT4G28706.4	0.999975
AT4G28750.1	TAS3A-5'D7[+]	329	6	5.02525	0.532642	no	PSAE-1	TAS3A-5'D7[+]:PSAE-1	0.999975
AT4G28980.2	TAS3C-5'D2[+]	599	5	0.179437	0.808757	no	CAK1AT	TAS3C-5'D2[+]:CAK1AT	0.999975
AT4G29060.2	TAS4-3'D4[+]	1144	6	0.149702	0.66692	no	emb2726	TAS4-3'D4[+]:emb2726	0.999975
AT4G30080.1	TAS1B-3'D5[+]	2211	6	0.593679	0.998715	no	ARF16	TAS1B-3'D5[+]:ARF16	0.999975
AT4G30270.1	TAS3C-5'D1[+]	840	5.5	0.241983	0.327524	no	MERI-5	TAS3C-5'D1[+]:MERI-5	0.999975
AT4G31820.1	TAS3C-5'D3[+]	1409	5.5	0.272744	0.831801	no	ENP	TAS3C-5'D3[+]:ENP	0.999975
AT4G32010.1	TAS1A-3'D3[-]	3246	5	0.0953578	0.713479	no	HSI2-L1	TAS1A-3'D3[-]:HSI2-L1	0.999975
AT4G33060.1	TAS3C-5'D4[+]	1705	6	0.349645	0.785707	no	NA	TAS3C-5'D4[+]:AT4G33060.1	0.999975
AT4G33430.2	TAS2-3'D1[-]	2125	5	0.0933071	0.71935	no	ATBAK1	TAS2-3'D1[-]:ATBAK1	0.999975
AT4G33520.3	TAS3B-5'D5[+]	69	6	0.341443	0.996193	no	AtHMAC6	TAS3B-5'D5[+]:AtHMAC6	0.999975
AT4G33530.1	TAS3C-5'D2[+]	2143	6	0.168158	0.651656	no	KUP5	TAS3C-5'D2[+]:KUP5	0.999975
AT4G33790.1	TAS3C-5'D8[-]	1417	5.5	0.299403	0.559434	no	CER4	TAS3C-5'D8[-]:CER4	0.999975
AT4G34620.1	TAS1C-3'D7[-]	524	5.5	0.908463	0.138475	no	SSR16	TAS1C-3'D7[-]:SSR16	0.999975
AT4G35550.1	TAS3A-5'D9[+]	989	4.5	0.0728001	0.733572	no	ATWOX13	TAS3A-5'D9[+]:ATWOX13	0.999975
AT4G37870.1	TAS3A-5'D4[-]	515	6	0.111763	0.836454	no	PCK1	TAS3A-5'D4[-]:PCK1	0.999975
AT4G38520.2	TAS2-3'D2[+]	2105	5	0.0933071	0.561116	no	NA	TAS2-3'D2[+]:AT4G38520.2	0.999975
AT4G38630.1	TAS3B-5'D7[+]	1203	6	0.185589	0.621561	no	ATMCB1	TAS3B-5'D7[+]:ATMCB1	0.999975
AT4G39040.2	TAS3C-5'D3[+]	330	5.5	0.350671	0.619813	no	NA	TAS3C-5'D3[+]:AT4G39040.2	0.999975
AT4G39040.2	TAS3C-5'D3[+]	432	5.5	0.0943325	0.497501	no	NA	TAS3C-5'D3[+]:AT4G39040.2	0.999975
AT4G39080.1	TAS3A-5'D1[+]	1992	6	0.65315	0.813346	no	VHA-A3	TAS3A-5'D1[+]:VHA-A3	0.999975
AT4G39480.1	TAS3A-5'D4[-]	1539	6	0.222502	0.580951	no	CYP96A9	TAS3A-5'D4[-]:CYP96A9	0.999975
AT4G40030.3	TAS3C-5'D9[-]	826	5	1.01818	0.395771	no	NA	TAS3C-5'D9[-]:AT4G40030.3	0.999975
AT5G01410.1	TAS1C-3'D7[-]	1134	4.5	0.603933	0.474847	no	ATPDX1	TAS1C-3'D7[-]:ATPDX1	0.999975
AT5G01820.1	TAS1A-3'D7[-]	1309	5.5	0.201995	0.726643	no	ATCIPK14	TAS1A-3'D7[-]:ATCIPK14	0.999975
AT5G02120.1	TAS2-3'D5[+]	339	6	0.539336	0.315243	no	OHP	TAS2-3'D5[+]:OHP	0.999975
AT5G02230.2	TAS1A-3'D9[-]	736	6	0.0799775	0.504858	no	NA	TAS1A-3'D9[-]:AT5G02230.2	0.999975
AT5G02590.1	TAS3C-5'D1[+]	695	5.5	0.0943325	0.81083	no	NA	TAS3C-5'D1[+]:AT5G02590.1	0.999975
AT5G05210.2	TAS3B-5'D9[+]	1149	4	0.222502	0.574792	no	NA	TAS3B-5'D9[+]:AT5G05210.2	0.999975
AT5G05250.1	TAS1B-3'D9[-]	596	6	0.1456	1.02665	no	NA	TAS1B-3'D9[-]:AT5G05250.1	0.999975
AT5G06960.2	TAS3C-5'D4[+]	56	5.5	0.104586	0.993544	no	OBF5	TAS3C-5'D4[+]:OBF5	0.999975
AT5G07530.2	TAS3B-5'D6[+]	635	5.5	0.448079	0.194494	no	ATGRP-7	TAS3B-5'D6[+]:ATGRP-7	0.999975
AT5G08680.1	TAS2-3'D10[+]	289	5.5	0.0307606	0.704332	no	NA	TAS2-3'D10[+]:AT5G08680.1	0.999975
AT5G09230.7	TAS1A-3'D9[-]	788	5	0.245059	0.785798	no	AtSRT2	TAS1A-3'D9[-]:AtSRT2	0.999975
AT5G09810.1	TAS1C-3'D5[+]	1319	5.5	0.0830536	0.334553	no	ACT7	TAS1C-3'D5[+]:ACT7	0.999975
AT5G10450.4	TAS4-3'D9[+]	519	6	0.150727	0.52806	no	14-3-3lambda	TAS4-3'D9[+]:14-3-3lambda	0.999975
AT5G10480.3	TAS3C-5'D3[+]	795	5	0.755685	0.70196	no	PAS2	TAS3C-5'D3[+]:PAS2	0.999975
AT5G13610.1	TAS1B-3'D4[-]	884	4	0.343493	0.674956	no	NA	TAS1B-3'D4[-]:AT5G13610.1	0.999975
AT5G14030.4	TAS1A-3'D2[-]	645	5	0.85822	0.88392	no	NA	TAS1A-3'D2[-]:AT5G14030.4	0.999975
AT5G14520.1	TAS3A-5'D9[+]	1204	6	0.195842	0.860545	no	NA	TAS3A-5'D9[+]:AT5G14520.1	0.999975
AT5G15010.1	TAS1C-3'D7[-]	1766	5	0.438851	1.0718	no	NA	TAS1C-3'D7[-]:AT5G15010.1	0.999975
AT5G15310.2	TAS2-3'D3[+]	951	5	0.0902311	0.612388	no	ATMIXTA	TAS2-3'D3[+]:ATMIXTA	0.999975
AT5G16040.1	TAS1A-3'D2[+]	535	5	0.136372	0.819563	no	NA	TAS1A-3'D2[+]:AT5G16040.1	0.999975
AT5G16260.1	TAS3B-5'D7[+]	1456	5	0.113814	0.777424	no	ELF9	TAS3B-5'D7[+]:ELF9	0.999975
AT5G16540.3	TAS3A-5'D3[+]	1521	5	0.546513	0.465908	no	ZFN3	TAS3A-5'D3[+]:ZFN3	0.999975
AT5G16620.1	TAS3C-5'D3[+]	796	6	0.90026	0.802882	no	ATTIC40	TAS3C-5'D3[+]:ATTIC40	0.999975
AT5G20190.1	TAS1A-3'D6[+]	644	5.5	0.113814	0.552734	no	NA	TAS1A-3'D6[+]:AT5G20190.1	0.999975
AT5G23210.4	TAS3A-5'D9[+]	469	6	0.477814	0.635406	no	SCPL34	TAS3A-5'D9[+]:SCPL34	0.999975
AT5G24690.1	TAS1B-3'D4[-]	1035	6	0.197893	0.774577	no	NA	TAS1B-3'D4[-]:AT5G24690.1	0.999975
AT5G24930.1	TAS3A-5'D6[+]	211	5.5	0.833612	0.930775	no	ATCOL4	TAS3A-5'D6[+]:ATCOL4	0.999975
AT5G26000.2	TAS3C-5'D2[+]	823	5.5	0.430648	0.523893	no	AtTGG1	TAS3C-5'D2[+]:AtTGG1	0.999975
AT5G26230.1	TAS4-3'D8[-]	547	5.5	0.127144	0.806349	no	MAKR1	TAS4-3'D8[-]:MAKR1	0.999975
AT5G26742.3	TAS3A-5'D7[+]	1804	6	0.18969	0.444503	no	AtRH3	TAS3A-5'D7[+]:AtRH3	0.999975
AT5G26780.3	TAS3C-5'D8[-]	1698	6	0.301454	0.769129	no	SHM2	TAS3C-5'D8[-]:SHM2	0.999975
AT5G27380.1	TAS3C-5'D8[-]	943	5	0.37733	0.780395	no	GSH2	TAS3C-5'D8[-]:GSH2	0.999975
AT5G28540.1	TAS1B-3'D4[-]	1747	5	0.0471662	0.484413	no	BIP1	TAS1B-3'D4[-]:BIP1	0.999975
AT5G28770.3	TAS4-3'D9[+]	422	6	0.0769015	0.734316	no	AtbZIP63	TAS4-3'D9[+]:AtbZIP63	0.999975
AT5G33370.2	TAS3C-5'D4[-]	1300	3.5	0.711595	0.491502	no	NA	TAS3C-5'D4[-]:AT5G33370.2	0.999975
AT5G35630.3	TAS2-3'D4[+]	1421	6	0.477814	0.209998	no	ATGSL1	TAS2-3'D4[+]:ATGSL1	0.999975
AT5G38410.3	TAS3C-5'D8[-]	100	4.5	0.309657	0.278439	no	RBCS3B	TAS3C-5'D8[-]:RBCS3B	0.999975
AT5G40340.1	TAS3B-5'D7[+]	2199	5.5	0.192766	0.834322	no	NA	TAS3B-5'D7[+]:AT5G40340.1	0.999975
AT5G42530.1	TAS3C-5'D1[-]	333	5	0.201995	0.425312	no	NA	TAS3C-5'D1[-]:AT5G42530.1	0.999975
AT5G42620.2	TAS3A-5'D2[+]	1551	6	0.23173	0.594611	no	NA	TAS3A-5'D2[+]:AT5G42620.2	0.999975
AT5G43960.2	TAS4-3'D3[-]	362	4.5	0.628541	0.776557	no	NA	TAS4-3'D3[-]:AT5G43960.2	0.999975
AT5G45190.2	TAS3C-5'D3[+]	1658	5.5	0.169183	0.718838	no	NA	TAS3C-5'D3[+]:AT5G45190.2	0.999975
AT5G46760.1	TAS3B-5'D7[+]	1268	5.5	0.372203	1.04449	no	MYC3	TAS3B-5'D7[+]:MYC3	0.999975
AT5G48655.3	TAS4-3'D3[+]	801	5.5	0.719798	0.924998	no	NA	TAS4-3'D3[+]:AT5G48655.3	0.999975
AT5G52650.1	TAS3B-5'D7[+]	528	6	0.483967	0.836926	no	NA	TAS3B-5'D7[+]:AT5G52650.1	0.999975
AT5G53880.1	TAS3B-5'D9[+]	241	6	0.407065	0.466876	no	NA	TAS3B-5'D9[+]:AT5G53880.1	0.999975
AT5G54300.1	TAS1A-3'D7[+]	187	5.5	0.144575	1.14457	no	NA	TAS1A-3'D7[+]:AT5G54300.1	0.999975
AT5G57150.4	TAS3C-5'D1[+]	134	6	0.10151	0.386114	no	NA	TAS3C-5'D1[+]:AT5G57150.4	0.999975
AT5G57710.1	TAS3B-5'D7[+]	3022	6	0.277871	1.00565	no	NA	TAS3B-5'D7[+]:AT5G57710.1	0.999975
AT5G57785.1	TAS1B-3'D10[-]	477	5.5	0.561893	1.06577	no	NA	TAS1B-3'D10[-]:AT5G57785.1	0.999975
AT5G58220.3	TAS3B-5'D10[+]	428	5.5	0.302479	0.66358	no	ALNS	TAS3B-5'D10[+]:ALNS	0.999975
AT5G58330.3	TAS3C-5'D10[-]	619	6	0.069724	0.480933	no	NA	TAS3C-5'D10[-]:AT5G58330.3	0.999975
AT5G59000.1	TAS3C-5'D3[+]	739	5.5	0.0922818	0.532031	no	NA	TAS3C-5'D3[+]:AT5G59000.1	0.999975
AT5G60548.1	TAS4-3'D10[-]	612	6	0.443978	1.19723	no	CPuORF62	TAS4-3'D10[-]:CPuORF62	0.999975
AT5G60550.1	TAS4-3'D10[-]	612	6	0.443978	1.19723	no	ATSNAK1	TAS4-3'D10[-]:ATSNAK1	0.999975
AT5G60600.3	TAS3C-5'D9[-]	1048	5	0.110738	0.461111	no	CLB4	TAS3C-5'D9[-]:CLB4	0.999975
AT5G61530.3	TAS4-3'D5[+]	1370	5	0.366051	0.799553	no	NA	TAS4-3'D5[+]:AT5G61530.3	0.999975
AT5G63370.4	TAS3C-5'D3[+]	1450	5	0.266592	0.699367	no	NA	TAS3C-5'D3[+]:AT5G63370.4	0.999975
AT5G63810.1	TAS1A-3'D7[-]	2150	6	0.800801	0.899604	no	AtBGAL10	TAS1A-3'D7[-]:AtBGAL10	0.999975
AT5G64610.1	TAS2-3'D4[-]	1456	5.5	0.641871	0.418713	no	HAM1	TAS2-3'D4[-]:HAM1	0.999975
AT5G65250.1	TAS3C-5'D6[+]	393	6	0.0994592	0.683293	no	NA	TAS3C-5'D6[+]:AT5G65250.1	0.999975
AT5G66210.4	TAS3C-5'D5[+]	1846	6	0.577274	0.827797	no	CPK28	TAS3C-5'D5[+]:CPK28	0.999975
AT5G66720.2	TAS3A-5'D6[+]	424	6	0.194817	0.915179	no	NA	TAS3A-5'D6[+]:AT5G66720.2	0.999975
AT5G66760.1	TAS1C-3'D5[-]	1777	6	0.558817	0.668466	no	SDH1-1	TAS1C-3'D5[-]:SDH1-1	0.999975
AT5G67440.2	TAS3B-5'D7[+]	1607	6	0.0902311	0.800493	no	MEL2	TAS3B-5'D7[+]:MEL2	0.999975
AT5G67570.1	TAS3B-5'D3[+]	673	6	0.292226	0.959643	no	DG1	TAS3B-5'D3[+]:DG1	0.999975

## Sheet: GSM280227
Target transcript	tasiRNA	tasiRNA slice site position in target transcript	Allen score of sRNA:target duplex	Slice site RPM	Slice site RPM + 1/Maximum adjacent site RPM + 1	Previously verified by 5' RACE?	Target gene common name	Interaction name	P-value adjusted for multiple testing
AT2G27400.1	TAS1B-3'D6[-]	492	0	0.395273	0.220765	no	TAS1a	TAS1B-3'D6[-]:TAS1a	0
AT2G27400.1	TAS1C-3'D6[-]	576	1	0.21824	0.783942	no	TAS1a	TAS1C-3'D6[-]:TAS1a	0
AT2G33860.1	TAS3C-5'D5[+]	1685	1.5	3.5773	2.49886	yes	ARF3	TAS3C-5'D5[+]:ARF3	0
AT2G33860.1	TAS3C-5'D5[+]	1805	1	0.380012	0.712989	yes	ARF3	TAS3C-5'D5[+]:ARF3	0
AT2G39675.1	TAS1A-3'D6[-]	429	0	0.416639	0.546589	no	TAS1c	TAS1A-3'D6[-]:TAS1c	0
AT5G18040.1	TAS1A-3'D2[+]	685	2	63.8816	14.8687	yes	NA	TAS1A-3'D2[+]:AT5G18040.1	0
AT5G60450.1	TAS3C-5'D5[+]	1885	1	0.700503	1.13093	yes	ARF4	TAS3C-5'D5[+]:ARF4	0
AT5G60450.1	TAS3C-5'D5[+]	2095	1.5	0.604356	0.829551	yes	ARF4	TAS3C-5'D5[+]:ARF4	0
AT5G62000.4	TAS3A-5'D7[+]	1745	1.5	7.44609	7.42609	yes	ARF1-BP	TAS3A-5'D7[+]:ARF1-BP	0
AT5G18065.1	TAS1A-3'D2[+]	736	2	9.80705	3.94885	no	NA	TAS1A-3'D2[+]:AT5G18065.1	0.000814878
AT2G27400.1	TAS1B-3'D6[-]	450	1.5	0.286916	0.959055	no	TAS1a	TAS1B-3'D6[-]:TAS1a	0.0842468
AT2G39675.1	TAS1A-3'D3[-]	408	3	0.634879	1.24528	no	TAS1c	TAS1A-3'D3[-]:TAS1c	0.100932
AT1G62914.1	TAS2-3'D6[-]	527	2	0.248763	1.06647	no	NA	TAS2-3'D6[-]:AT1G62914.1	0.133768
AT3G27330.1	TAS1A-3'D7[-]	2435	2	0.184664	0.947512	no	NA	TAS1A-3'D7[-]:AT3G27330.1	0.143269
AT1G03560.1	TAS1A-3'D9[-]	1242	5	0.717291	1.42212	no	NA	TAS1A-3'D9[-]:AT1G03560.1	0.221608
AT2G03090.1	TAS3C-5'D3[-]	1151	1.5	0.105304	0.981035	no	ATEXP15	TAS3C-5'D3[-]:ATEXP15	0.221608
AT4G29770.2	TAS1A-3'D6[+]	780	3	0.24571	1.06804	yes	NA	TAS1A-3'D6[+]:AT4G29770.2	0.221608
AT5G27250.1	TAS4-3'D2[-]	654	3	0.184664	0.998714	no	NA	TAS4-3'D2[-]:AT5G27250.1	0.221608
AT2G03410.1	TAS1A-3'D9[-]	1290	3.5	0.296073	1.06123	no	NA	TAS1A-3'D9[-]:AT2G03410.1	0.285825
AT2G30570.1	TAS3B-5'D7[+]	263	6	4.15876	1.56403	no	PSBW	TAS3B-5'D7[+]:PSBW	0.285825
AT3G17185.2	TAS3B-5'D8[-]	705	1	0.787494	0.304595	no	TAS3a	TAS3B-5'D8[-]:TAS3a	0.285825
AT4G21180.1	TAS3C-5'D8[-]	2132	2.5	0.242658	0.851502	no	ATERDJ2B	TAS3C-5'D8[-]:ATERDJ2B	0.285825
AT5G12360.1	TAS1B-3'D10[+]	37	3	0.152615	1.01206	no	NA	TAS1B-3'D10[+]:AT5G12360.1	0.285825
AT4G12420.2	TAS3B-5'D7[+]	1677	4.5	0.607408	1.1831	no	SKU5	TAS3B-5'D7[+]:SKU5	0.328636
AT3G08943.1	TAS1C-3'D6[-]	2552	5	0.361698	1.19086	no	NA	TAS1C-3'D6[-]:AT3G08943.1	0.336083
AT3G14810.2	TAS3B-5'D8[-]	298	5.5	0.894325	1.43456	no	MSL5	TAS3B-5'D8[-]:MSL5	0.336083
AT3G55750.1	TAS3C-5'D9[-]	22	6	3.03857	1.7361	no	NA	TAS3C-5'D9[-]:AT3G55750.1	0.358147
AT4G25600.1	TAS2-3'D8[-]	910	4	0.488368	1.17465	no	NA	TAS2-3'D8[-]:AT4G25600.1	0.410228
AT5G39870.1	TAS3C-5'D3[+]	702	4	0.189243	1.04562	no	NA	TAS3C-5'D3[+]:AT5G39870.1	0.463451
AT3G26932.2	TAS3C-5'D8[-]	912	4	0.309809	1.12891	no	DRB3	TAS3C-5'D8[-]:DRB3	0.530381
AT1G27752.2	TAS4-3'D4[+]	2675	4.5	0.253341	1.08309	no	NA	TAS4-3'D4[+]:AT1G27752.2	0.633033
AT1G29470.2	TAS4-3'D1[-]	1529	4	0.433427	1.12586	no	NA	TAS4-3'D1[-]:AT1G29470.2	0.680379
AT4G04700.1	TAS2-3'D4[-]	721	4	0.117514	1.11751	no	CPK27	TAS2-3'D4[-]:CPK27	0.680379
AT4G31340.2	TAS3C-5'D4[-]	1692	2	0.476159	0.959335	no	NA	TAS3C-5'D4[-]:AT4G31340.2	0.680379
AT1G17500.1	TAS3C-5'D8[-]	3806	3.5	0.187717	0.922917	no	NA	TAS3C-5'D8[-]:AT1G17500.1	0.694659
AT1G42990.1	TAS4-3'D4[-]	63	4	0.16635	1.02138	no	ATBZIP60	TAS4-3'D4[-]:ATBZIP60	0.694659
AT5G06560.1	TAS3C-5'D9[+]	1964	4	0.22587	1.01388	no	NA	TAS3C-5'D9[+]:AT5G06560.1	0.694659
AT5G17760.2	TAS3C-5'D9[-]	1302	2.5	0.20603	0.905989	no	NA	TAS3C-5'D9[-]:AT5G17760.2	0.694659
AT5G22150.1	TAS4-3'D5[+]	834	5.5	0.190769	1.19077	no	NA	TAS4-3'D5[+]:AT5G22150.1	0.694659
AT1G62290.2	TAS2-3'D4[+]	872	5.5	0.201452	1.19962	no	NA	TAS2-3'D4[+]:AT1G62290.2	0.814488
AT1G71440.1	TAS3B-5'D5[+]	1289	4.5	0.831752	1.12779	no	PFI	TAS3B-5'D5[+]:PFI	0.831451
AT2G05920.1	TAS3C-5'D3[+]	2460	3	0.291495	0.789227	no	NA	TAS3C-5'D3[+]:AT2G05920.1	0.831451
AT2G44680.2	TAS1A-3'D5[-]	1254	3	0.210609	0.949716	no	CKB4	TAS1A-3'D5[-]:CKB4	0.831451
AT3G28030.1	TAS3B-5'D9[+]	3901	6	0.584516	1.26116	no	UVH3	TAS3B-5'D9[+]:UVH3	0.831451
AT1G28230.1	TAS3C-5'D8[-]	55	5	0.164824	1.16482	no	ATPUP1	TAS3C-5'D8[-]:ATPUP1	0.83716
AT3G05830.2	TAS3C-5'D3[-]	45	3	0.180086	1.02519	no	NA	TAS3C-5'D3[-]:AT3G05830.2	0.868341
AT1G79529.1	TAS3A-5'D8[+]	419	5.5	0.155667	1.15567	no	NA	TAS3A-5'D8[+]:AT1G79529.1	0.873368
AT5G07530.2	TAS3C-5'D3[+]	165	5.5	1.10188	1.13144	no	ATGRP-7	TAS3C-5'D3[+]:ATGRP-7	0.873368
AT5G48120.1	TAS3A-5'D10[-]	3184	4	0.811913	0.998318	no	MET18	TAS3A-5'D10[-]:MET18	0.873368
AT2G27400.1	TAS1B-3'D6[-]	408	4	0.195347	1.03025	no	TAS1a	TAS1B-3'D6[-]:TAS1a	0.921601
AT5G44610.1	TAS3C-5'D8[-]	286	5	0.151089	1.15109	no	MAP18	TAS3C-5'D8[-]:MAP18	0.921601
AT1G20515.1	TAS3C-5'D3[+]	283	5.5	0.169403	1.1694	no	NA	TAS3C-5'D3[+]:AT1G20515.1	0.941902
AT2G02760.1	TAS2-3'D6[+]	773	5	0.938583	1.12786	no	ATUBC2	TAS2-3'D6[+]:ATUBC2	0.948529
AT2G37290.2	TAS3C-5'D3[+]	2537	6	0.154141	1.15414	no	NA	TAS3C-5'D3[+]:AT2G37290.2	0.948529
AT3G15355.1	TAS4-3'D1[+]	161	5.5	0.132775	1.13278	no	PFU1	TAS4-3'D1[+]:PFU1	0.948529
AT1G05910.1	TAS3A-5'D1[+]	982	5.5	0.105304	1.1053	no	NA	TAS3A-5'D1[+]:AT1G05910.1	0.957943
AT1G49520.1	TAS3A-5'D10[+]	921	4	0.189243	0.948858	no	NA	TAS3A-5'D10[+]:AT1G49520.1	0.960603
AT2G38720.1	TAS3C-5'D8[-]	1575	5	0.219766	1.04992	no	MAP65-5	TAS3C-5'D8[-]:MAP65-5	0.960603
AT4G11820.2	TAS3A-5'D3[-]	161	6	0.250289	1.15673	no	FKP1	TAS3A-5'D3[-]:FKP1	0.960603
AT1G23820.2	TAS3B-5'D9[+]	242	4.5	0.280812	1.07013	no	SPDS1	TAS3B-5'D9[+]:SPDS1	0.971803
AT5G61150.2	TAS3A-5'D8[+]	1407	4	0.363224	0.920638	no	VIP4	TAS3A-5'D8[+]:VIP4	0.977338
AT1G01240.3	TAS2-3'D7[+]	1693	5	0.215187	0.849558	no	NA	TAS2-3'D7[+]:AT1G01240.3	0.999996
AT1G01260.3	TAS3A-5'D5[-]	2526	5	0.146511	0.783163	no	NA	TAS3A-5'D5[-]:AT1G01260.3	0.999996
AT1G02010.2	TAS3C-5'D8[-]	1139	5.5	0.146511	0.759412	no	SEC1A	TAS3C-5'D8[-]:SEC1A	0.999996
AT1G02340.1	TAS3A-5'D9[+]	614	6	0.13888	0.997327	no	FBI1	TAS3A-5'D9[+]:FBI1	0.999996
AT1G02780.1	TAS3C-5'D8[-]	70	5.5	0.334227	0.111266	no	emb2386	TAS3C-5'D8[-]:emb2386	0.999996
AT1G03080.1	TAS1A-3'D9[-]	5175	5.5	0.15872	0.791502	no	NET1D	TAS1A-3'D9[-]:NET1D	0.999996
AT1G03820.1	TAS4-3'D9[+]	518	5	0.102252	0.789127	no	NA	TAS4-3'D9[+]:AT1G03820.1	0.999996
AT1G04250.1	TAS3A-5'D10[-]	935	5	0.112935	0.85971	no	AXR3	TAS3A-5'D10[-]:AXR3	0.999996
AT1G04270.2	TAS1A-3'D5[+]	82	5	0.271655	0.740501	no	RPS15	TAS1A-3'D5[+]:RPS15	0.999996
AT1G04830.2	TAS1C-3'D6[-]	832	6	0.413587	0.629136	no	NA	TAS1C-3'D6[-]:AT1G04830.2	0.999996
AT1G05520.1	TAS1C-3'D10[-]	1369	5	0.0869906	0.846656	no	NA	TAS1C-3'D10[-]:AT1G05520.1	0.999996
AT1G06550.1	TAS3C-5'D10[+]	1260	6	0.17856	0.120885	no	NA	TAS3C-5'D10[+]:AT1G06550.1	0.999996
AT1G07750.1	TAS4-3'D9[+]	870	6	0.149563	0.910546	no	NA	TAS4-3'D9[+]:AT1G07750.1	0.999996
AT1G08110.4	TAS3B-5'D5[+]	663	5	0.108357	0.62865	no	NA	TAS3B-5'D5[+]:AT1G08110.4	0.999996
AT1G08190.1	TAS1B-3'D4[-]	1116	5.5	0.161772	1.04103	no	ATVAM2	TAS1B-3'D4[-]:ATVAM2	0.999996
AT1G08190.1	TAS1C-3'D7[+]	3202	4.5	0.126671	0.694332	no	ATVAM2	TAS1C-3'D7[+]:ATVAM2	0.999996
AT1G08980.1	TAS3B-5'D5[-]	1198	6	0.137354	0.411454	no	AMI1	TAS3B-5'D5[-]:AMI1	0.999996
AT1G09770.1	TAS3C-5'D7[+]	2133	5	0.146511	0.76327	no	ATCDC5	TAS3C-5'D7[+]:ATCDC5	0.999996
AT1G09770.1	TAS3A-5'D8[+]	2825	6	0.151089	0.762444	no	ATCDC5	TAS3A-5'D8[+]:ATCDC5	0.999996
AT1G09770.1	TAS3B-5'D9[+]	768	6	0.170929	0.978323	no	ATCDC5	TAS3B-5'D9[+]:ATCDC5	0.999996
AT1G10490.1	TAS3C-5'D8[-]	2896	6	0.134301	0.787131	no	NA	TAS3C-5'D8[-]:AT1G10490.1	0.999996
AT1G10865.2	TAS2-3'D4[+]	505	4.5	0.244184	0.823275	no	NA	TAS2-3'D4[+]:AT1G10865.2	0.999996
AT1G10940.2	TAS1C-3'D5[-]	460	6	0.111409	0.745201	no	ASK1	TAS1C-3'D5[-]:ASK1	0.999996
AT1G11860.3	TAS3B-5'D1[+]	1447	6	0.163298	0.440795	no	NA	TAS3B-5'D1[+]:AT1G11860.3	0.999996
AT1G12080.2	TAS3C-5'D8[-]	300	6	1.88174	0.691095	no	NA	TAS3C-5'D8[-]:AT1G12080.2	0.999996
AT1G12090.1	TAS4-3'D7[+]	784	5.5	0.120566	0.4967	no	ELP	TAS4-3'D7[+]:ELP	0.999996
AT1G12360.1	TAS3C-5'D3[-]	2337	4.5	0.112935	0.568281	no	KEU	TAS3C-5'D3[-]:KEU	0.999996
AT1G12430.2	TAS1A-3'D3[-]	1957	5	0.128197	0.935463	no	ARK3	TAS1A-3'D3[-]:ARK3	0.999996
AT1G14710.2	TAS3C-5'D8[-]	2242	6	0.235027	0.835785	no	NA	TAS3C-5'D8[-]:AT1G14710.2	0.999996
AT1G15270.1	TAS3B-5'D9[+]	207	6	0.412061	0.375011	no	NA	TAS3B-5'D9[+]:AT1G15270.1	0.999996
AT1G15340.2	TAS3B-5'D9[+]	861	6	0.415113	0.858365	no	MBD10	TAS3B-5'D9[+]:MBD10	0.999996
AT1G15440.2	TAS1A-3'D7[-]	1734	5.5	0.117514	0.911609	no	ATPWP2	TAS1A-3'D7[-]:ATPWP2	0.999996
AT1G15910.1	TAS3A-5'D7[+]	240	6	0.170929	1.00524	no	FDM1	TAS3A-5'D7[+]:FDM1	0.999996
AT1G16630.1	TAS3B-5'D7[+]	2050	5	0.15872	1.00132	no	NA	TAS3B-5'D7[+]:AT1G16630.1	0.999996
AT1G16705.2	TAS2-3'D5[+]	344	6	0.125144	0.869141	no	NA	TAS2-3'D5[+]:AT1G16705.2	0.999996
AT1G17360.1	TAS3C-5'D4[+]	1963	4.5	0.134301	0.973796	no	NA	TAS3C-5'D4[+]:AT1G17360.1	0.999996
AT1G17490.1	TAS1A-3'D5[+]	342	6	0.143458	0.738721	no	NA	TAS1A-3'D5[+]:AT1G17490.1	0.999996
AT1G18335.1	TAS3C-5'D1[+]	1000	6	0.260972	0.837768	no	NA	TAS3C-5'D1[+]:AT1G18335.1	0.999996
AT1G18540.1	TAS4-3'D8[+]	728	4.5	1.31554	0.594008	no	NA	TAS4-3'D8[+]:AT1G18540.1	0.999996
AT1G19270.1	TAS3C-5'D3[+]	1603	6	0.320492	0.780734	no	DA1	TAS3C-5'D3[+]:DA1	0.999996
AT1G19430.1	TAS4-3'D9[+]	1006	6	0.184664	0.831769	no	NA	TAS4-3'D9[+]:AT1G19430.1	0.999996
AT1G19650.2	TAS3A-5'D8[+]	2124	5	0.0961475	0.436292	no	NA	TAS3A-5'D8[+]:AT1G19650.2	0.999996
AT1G19870.1	TAS2-3'D1[-]	238	5.5	0.115988	0.792038	no	iqd32	TAS2-3'D1[-]:iqd32	0.999996
AT1G20220.1	TAS3B-5'D7[+]	691	5	0.0946214	0.73772	no	NA	TAS3B-5'D7[+]:AT1G20220.1	0.999996
AT1G20440.1	TAS3C-5'D3[+]	485	5.5	0.334227	0.42434	no	AtCOR47	TAS3C-5'D3[+]:AtCOR47	0.999996
AT1G20670.1	TAS3B-5'D7[+]	31	5.5	0.100726	0.413973	no	NA	TAS3B-5'D7[+]:AT1G20670.1	0.999996
AT1G20816.1	TAS3C-5'D8[-]	572	4.5	0.181612	0.957934	no	NA	TAS3C-5'D8[-]:AT1G20816.1	0.999996
AT1G20970.1	TAS3B-5'D7[+]	3918	5.5	0.161772	0.870745	no	NA	TAS3B-5'D7[+]:AT1G20970.1	0.999996
AT1G21200.1	TAS3B-5'D5[+]	1318	5.5	0.16635	0.846109	no	NA	TAS3B-5'D5[+]:AT1G21200.1	0.999996
AT1G21780.2	TAS1A-3'D7[+]	337	6	0.236553	0.784174	no	NA	TAS1A-3'D7[+]:AT1G21780.2	0.999996
AT1G22030.1	TAS3C-5'D8[+]	1165	6	0.157194	0.0443514	no	NA	TAS3C-5'D8[+]:AT1G22030.1	0.999996
AT1G22160.1	TAS1A-3'D3[+]	327	5.5	0.167877	0.697424	no	NA	TAS1A-3'D3[+]:AT1G22160.1	0.999996
AT1G22380.1	TAS4-3'D7[+]	903	5.5	0.15872	0.844314	no	AtUGT85A3	TAS4-3'D7[+]:AtUGT85A3	0.999996
AT1G22520.2	TAS3B-5'D9[+]	57	6	0.320492	1.12043	no	NA	TAS3B-5'D9[+]:AT1G22520.2	0.999996
AT1G23740.1	TAS1A-3'D9[-]	603	5	0.22587	0.718308	no	AOR	TAS1A-3'D9[-]:AOR	0.999996
AT1G23860.4	TAS3B-5'D7[-]	1467	6	0.149563	0.865555	no	At-RSZ21	TAS3B-5'D7[-]:At-RSZ21	0.999996
AT1G24260.3	TAS3B-5'D7[-]	1038	5	0.395273	0.913108	no	AGL9	TAS3B-5'D7[-]:AGL9	0.999996
AT1G24764.1	TAS1A-3'D1[+]	2414	4	0.126671	0.583019	no	ATMAP70-2	TAS1A-3'D1[+]:ATMAP70-2	0.999996
AT1G26160.1	TAS1A-3'D9[-]	749	6	0.346436	0.862202	no	NA	TAS1A-3'D9[-]:AT1G26160.1	0.999996
AT1G26290.1	TAS3B-5'D6[+]	485	5	0.137354	0.965037	no	NA	TAS3B-5'D6[+]:AT1G26290.1	0.999996
AT1G26761.1	TAS1B-3'D4[-]	1292	4	0.192295	0.834444	no	NA	TAS1B-3'D4[-]:AT1G26761.1	0.999996
AT1G27850.1	TAS3A-5'D9[+]	3941	6	0.17856	1.00915	no	NA	TAS3A-5'D9[+]:AT1G27850.1	0.999996
AT1G27980.1	TAS3B-5'D9[+]	1352	5.5	0.18619	0.636436	no	ATDPL1	TAS3B-5'D9[+]:ATDPL1	0.999996
AT1G28320.1	TAS3A-5'D4[+]	1223	6	0.422744	1.10686	no	DEG15	TAS3A-5'D4[+]:DEG15	0.999996
AT1G29470.2	TAS3B-5'D7[+]	1806	5.5	0.219766	0.844649	no	NA	TAS3B-5'D7[+]:AT1G29470.2	0.999996
AT1G29470.2	TAS3C-5'D2[+]	2313	5	0.128197	0.579688	no	NA	TAS3C-5'D2[+]:AT1G29470.2	0.999996
AT1G29700.1	TAS1A-3'D7[-]	1231	6	0.111409	0.893283	no	NA	TAS1A-3'D7[-]:AT1G29700.1	0.999996
AT1G30360.1	TAS2-3'D3[+]	2344	5.5	0.154141	0.759095	no	ERD4	TAS2-3'D3[+]:ERD4	0.999996
AT1G31330.1	TAS3C-5'D1[+]	358	5	1.15988	0.431445	no	PSAF	TAS3C-5'D1[+]:PSAF	0.999996
AT1G31830.2	TAS4-3'D9[-]	1814	6	0.169403	0.916293	no	PUT2	TAS4-3'D9[-]:PUT2	0.999996
AT1G32700.2	TAS3A-5'D4[+]	1209	5	0.154141	0.48008	no	NA	TAS3A-5'D4[+]:AT1G32700.2	0.999996
AT1G32730.1	TAS1A-3'D4[+]	1393	5.5	0.169403	0.987118	no	NA	TAS1A-3'D4[+]:AT1G32730.1	0.999996
AT1G34030.1	TAS3C-5'D2[+]	355	6	0.120566	0.491052	no	NA	TAS3C-5'D2[+]:AT1G34030.1	0.999996
AT1G35420.2	TAS4-3'D9[+]	323	6	0.114461	0.739679	no	NA	TAS4-3'D9[+]:AT1G35420.2	0.999996
AT1G42550.1	TAS3A-5'D1[+]	2397	4.5	0.11904	0.677522	no	PMI1	TAS3A-5'D1[+]:PMI1	0.999996
AT1G43170.9	TAS2-3'D8[-]	1172	5	0.544836	0.533534	no	ARP1	TAS2-3'D8[-]:ARP1	0.999996
AT1G43850.2	TAS3B-5'D6[+]	1985	4.5	0.120566	0.781739	no	SEU	TAS3B-5'D6[+]:SEU	0.999996
AT1G44170.3	TAS4-3'D9[+]	870	6	0.15872	0.668205	no	ALDH3H1	TAS4-3'D9[+]:ALDH3H1	0.999996
AT1G44542.1	TAS1A-3'D7[-]	197	5.5	0.0976737	0.615136	no	NA	TAS1A-3'D7[-]:AT1G44542.1	0.999996
AT1G47200.1	TAS3B-5'D7[+]	622	5	0.288443	0.436021	no	WPP2	TAS3B-5'D7[+]:WPP2	0.999996
AT1G47380.1	TAS3C-5'D3[+]	1959	5	0.288443	0.961286	no	NA	TAS3C-5'D3[+]:AT1G47380.1	0.999996
AT1G48350.1	TAS2-3'D1[-]	336	4	0.27776	0.654996	no	EMB3105	TAS2-3'D1[-]:EMB3105	0.999996
AT1G48420.1	TAS1A-3'D7[-]	1066	4.5	0.196874	0.743187	no	ACD1	TAS1A-3'D7[-]:ACD1	0.999996
AT1G48630.1	TAS2-3'D4[-]	987	5	0.132775	0.692234	no	RACK1B	TAS2-3'D4[-]:RACK1B	0.999996
AT1G48860.2	TAS1C-3'D7[-]	1764	5.5	0.482264	0.467339	no	NA	TAS1C-3'D7[-]:AT1G48860.2	0.999996
AT1G48920.1	TAS4-3'D9[+]	1286	6	0.137354	0.510356	no	ATNUC-L1	TAS4-3'D9[+]:ATNUC-L1	0.999996
AT1G49520.1	TAS3B-5'D7[+]	691	6	0.125144	0.89881	no	NA	TAS3B-5'D7[+]:AT1G49520.1	0.999996
AT1G50920.1	TAS4-3'D2[-]	1957	5	0.132775	0.766588	no	NA	TAS4-3'D2[-]:AT1G50920.1	0.999996
AT1G50920.1	TAS3C-5'D2[+]	2029	5.5	0.105304	0.710569	no	NA	TAS3C-5'D2[+]:AT1G50920.1	0.999996
AT1G51745.2	TAS3C-5'D3[-]	2229	4.5	0.164824	0.956153	no	NA	TAS3C-5'D3[-]:AT1G51745.2	0.999996
AT1G52280.1	TAS3A-5'D10[-]	391	6	0.315913	1.02986	no	AtRABG3d	TAS3A-5'D10[-]:AtRABG3d	0.999996
AT1G53570.5	TAS3C-5'D10[-]	1170	6	0.160246	0.685989	no	MAP3KA	TAS3C-5'D10[-]:MAP3KA	0.999996
AT1G54570.1	TAS3C-5'D4[+]	1791	5	0.137354	0.700915	no	PES1	TAS3C-5'D4[+]:PES1	0.999996
AT1G54770.1	TAS3B-5'D7[+]	656	6	0.108357	0.546357	no	NA	TAS3B-5'D7[+]:AT1G54770.1	0.999996
AT1G54850.1	TAS3C-5'D1[+]	681	6	0.128197	0.775503	no	NA	TAS3C-5'D1[+]:AT1G54850.1	0.999996
AT1G55040.1	TAS3A-5'D1[+]	2485	6	0.0900429	0.899275	no	NA	TAS3A-5'D1[+]:AT1G55040.1	0.999996
AT1G55110.1	TAS3A-5'D8[+]	1137	6	0.181612	0.95912	no	AtIDD7	TAS3A-5'D8[+]:AtIDD7	0.999996
AT1G56070.1	TAS1C-3'D6[-]	2382	5	0.538731	0.305321	no	LOS1	TAS1C-3'D6[-]:LOS1	0.999996
AT1G56110.1	TAS3C-5'D8[-]	1540	5	0.773759	0.514439	no	NOP56	TAS3C-5'D8[-]:NOP56	0.999996
AT1G56280.2	TAS3B-5'D7[+]	853	5.5	0.312861	0.618326	no	ATDI19	TAS3B-5'D7[+]:ATDI19	0.999996
AT1G56660.1	TAS3B-5'D7[+]	534	5.5	0.108357	0.744679	no	NA	TAS3B-5'D7[+]:AT1G56660.1	0.999996
AT1G58070.1	TAS3C-5'D3[+]	81	5.5	0.123618	0.805303	no	NA	TAS3C-5'D3[+]:AT1G58070.1	0.999996
AT1G60600.2	TAS1C-3'D7[-]	437	4.5	0.157194	0.833012	no	ABC4	TAS1C-3'D7[-]:ABC4	0.999996
AT1G61100.2	TAS1A-3'D9[-]	710	4.5	0.160246	0.864656	no	NA	TAS1A-3'D9[-]:AT1G61100.2	0.999996
AT1G61100.2	TAS3A-5'D7[+]	823	4	0.0961475	0.498004	no	NA	TAS3A-5'D7[+]:AT1G61100.2	0.999996
AT1G61300.1	TAS4-3'D8[-]	2323	5	0.0137354	0.651702	no	NA	TAS4-3'D8[-]:AT1G61300.1	0.999996
AT1G61680.2	TAS2-3'D5[-]	1305	6	0.126671	0.448714	no	ATTPS14	TAS2-3'D5[-]:ATTPS14	0.999996
AT1G61980.1	TAS4-3'D6[-]	1515	4	0.0976737	0.845926	no	NA	TAS4-3'D6[-]:AT1G61980.1	0.999996
AT1G62540.1	TAS3C-5'D3[+]	1156	6	0.126671	0.827402	no	FMO GS-OX2	TAS3C-5'D3[+]:FMO GS-OX2	0.999996
AT1G63480.1	TAS1C-3'D5[-]	963	6	0.134301	1.1343	no	NA	TAS1C-3'D5[-]:AT1G63480.1	0.999996
AT1G64230.5	TAS3A-5'D4[-]	55	6	0.137354	0.303161	no	UBC28	TAS3A-5'D4[-]:UBC28	0.999996
AT1G64230.5	TAS3C-5'D9[+]	777	6	0.0869906	0.618673	no	UBC28	TAS3C-5'D9[+]:UBC28	0.999996
AT1G65060.2	TAS1C-3'D7[-]	1381	6	0.137354	0.695032	no	4CL3	TAS1C-3'D7[-]:4CL3	0.999996
AT1G65370.1	TAS3A-5'D9[-]	317	5	0.0961475	0.35854	no	NA	TAS3A-5'D9[-]:AT1G65370.1	0.999996
AT1G65960.2	TAS3B-5'D6[+]	1452	6	0.84854	0.556831	no	GAD2	TAS3B-5'D6[+]:GAD2	0.999996
AT1G66350.1	TAS1C-3'D7[-]	1591	5	0.799703	0.171047	no	RGL	TAS1C-3'D7[-]:RGL	0.999996
AT1G66580.1	TAS3B-5'D7[-]	767	4	0.122092	0.333558	no	RPL10C	TAS3B-5'D7[-]:RPL10C	0.999996
AT1G67140.3	TAS3C-5'D3[+]	6105	5.5	0.0122092	0.666413	no	SWEETIE	TAS3C-5'D3[+]:SWEETIE	0.999996
AT1G67310.1	TAS4-3'D9[-]	3042	5	0.134301	0.869043	no	NA	TAS4-3'D9[-]:AT1G67310.1	0.999996
AT1G67840.2	TAS3A-5'D6[-]	1915	6	0.299126	0.907274	no	CSK	TAS3A-5'D6[-]:CSK	0.999996
AT1G68560.1	TAS1A-3'D7[+]	2201	5.5	0.241132	0.589631	no	ATXYL1	TAS1A-3'D7[+]:ATXYL1	0.999996
AT1G69610.1	TAS3C-5'D3[+]	419	5.5	0.144984	0.98555	no	NA	TAS3C-5'D3[+]:AT1G69610.1	0.999996
AT1G70180.2	TAS3B-5'D7[-]	1743	4	0.143458	0.711368	no	NA	TAS3B-5'D7[-]:AT1G70180.2	0.999996
AT1G70690.1	TAS3B-5'D1[+]	863	4.5	0.146511	0.949447	no	HWI1	TAS3B-5'D1[+]:HWI1	0.999996
AT1G70700.2	TAS1C-3'D5[-]	1014	6	0.494473	0.708446	no	JAZ9	TAS1C-3'D5[-]:JAZ9	0.999996
AT1G71030.1	TAS1C-3'D1[+]	737	4	0.122092	0.63534	no	ATMYBL2	TAS1C-3'D1[+]:ATMYBL2	0.999996
AT1G71220.2	TAS1C-3'D7[-]	2368	4.5	0.102252	0.932838	no	EBS1	TAS1C-3'D7[-]:EBS1	0.999996
AT1G71760.2	TAS3A-5'D1[+]	811	5.5	0.143458	0.925857	no	NA	TAS3A-5'D1[+]:AT1G71760.2	0.999996
AT1G71980.1	TAS3A-5'D4[-]	95	6	0.131249	0.744786	no	NA	TAS3A-5'D4[-]:AT1G71980.1	0.999996
AT1G72150.1	TAS3C-5'D2[+]	114	6	0.105304	0.835109	no	PATL1	TAS3C-5'D2[+]:PATL1	0.999996
AT1G72260.1	TAS2-3'D3[+]	140	6	0.537205	0.496853	no	THI2.1	TAS2-3'D3[+]:THI2.1	0.999996
AT1G72610.1	TAS3B-5'D7[+]	54	4.5	0.781389	0.16472	no	ATGER1	TAS3B-5'D7[+]:ATGER1	0.999996
AT1G73480.1	TAS3C-5'D3[+]	1878	5	0.199926	0.888166	no	NA	TAS3C-5'D3[+]:AT1G73480.1	0.999996
AT1G73660.1	TAS1A-3'D9[-]	2845	6	0.207557	0.917657	no	NA	TAS1A-3'D9[-]:AT1G73660.1	0.999996
AT1G73760.1	TAS3A-5'D1[+]	1039	5	0.143458	0.800265	no	NA	TAS3A-5'D1[+]:AT1G73760.1	0.999996
AT1G74050.1	TAS4-3'D8[+]	822	4.5	0.131249	0.461188	no	NA	TAS4-3'D8[+]:AT1G74050.1	0.999996
AT1G74060.1	TAS4-3'D8[+]	771	4.5	0.170929	0.39442	no	NA	TAS4-3'D8[+]:AT1G74060.1	0.999996
AT1G74250.1	TAS3B-5'D7[+]	789	6	0.0824122	0.814994	no	NA	TAS3B-5'D7[+]:AT1G74250.1	0.999996
AT1G74310.1	TAS4-3'D4[+]	2906	6	0.213661	0.87366	no	ATHSP101	TAS4-3'D4[+]:ATHSP101	0.999996
AT1G74470.1	TAS3B-5'D7[+]	560	5	0.421218	0.501412	no	NA	TAS3B-5'D7[+]:AT1G74470.1	0.999996
AT1G74580.1	TAS3C-5'D2[+]	1674	6	0.122092	1.00136	no	NA	TAS3C-5'D2[+]:AT1G74580.1	0.999996
AT1G75010.1	TAS3A-5'D4[-]	2384	5	0.195347	0.532005	no	ARC3	TAS3A-5'D4[-]:ARC3	0.999996
AT1G75460.1	TAS3C-5'D5[+]	541	5.5	0.161772	0.884916	no	NA	TAS3C-5'D5[+]:AT1G75460.1	0.999996
AT1G75460.1	TAS3A-5'D6[-]	988	4.5	0.123618	0.872074	no	NA	TAS3A-5'D6[-]:AT1G75460.1	0.999996
AT1G75550.1	TAS3A-5'D1[+]	289	6	0.0137354	0.78586	no	NA	TAS3A-5'D1[+]:AT1G75550.1	0.999996
AT1G75940.1	TAS2-3'D3[+]	1613	6	2.6845	0.628505	no	ATA27	TAS2-3'D3[+]:ATA27	0.999996
AT1G76820.1	TAS4-3'D9[+]	585	5.5	0.112935	0.577278	no	NA	TAS4-3'D9[+]:AT1G76820.1	0.999996
AT1G76850.1	TAS2-3'D3[+]	2497	6	0.132775	0.691589	no	SEC5A	TAS2-3'D3[+]:SEC5A	0.999996
AT1G76890.2	TAS3A-5'D8[+]	1310	5.5	0.149563	0.819417	no	AT-GT2	TAS3A-5'D8[+]:AT-GT2	0.999996
AT1G77800.2	TAS1B-3'D3[+]	1109	6	0.149563	0.996033	no	NA	TAS1B-3'D3[+]:AT1G77800.2	0.999996
AT1G78110.1	TAS3C-5'D3[+]	625	5.5	0.254867	0.870796	no	NA	TAS3C-5'D3[+]:AT1G78110.1	0.999996
AT1G78660.3	TAS4-3'D6[-]	1094	5	0.366276	0.141044	no	ATGGH1	TAS4-3'D6[-]:ATGGH1	0.999996
AT1G78660.3	TAS1A-3'D9[+]	835	4	0.131249	0.578083	no	ATGGH1	TAS1A-3'D9[+]:ATGGH1	0.999996
AT1G78680.2	TAS4-3'D6[-]	1133	5	1.25297	0.0573316	no	ATGGH2	TAS4-3'D6[-]:ATGGH2	0.999996
AT1G78950.1	TAS4-3'D1[+]	1561	6	0.0976737	0.8134	no	AtBAS	TAS4-3'D1[+]:AtBAS	0.999996
AT1G80000.2	TAS1B-3'D10[-]	2378	6	1.80086	0.487159	no	NA	TAS1B-3'D10[-]:AT1G80000.2	0.999996
AT1G80000.2	TAS3C-5'D10[+]	357	5.5	0.0259446	0.872768	no	NA	TAS3C-5'D10[+]:AT1G80000.2	0.999996
AT1G80360.1	TAS3C-5'D8[-]	1277	5.5	0.175507	0.872062	no	NA	TAS3C-5'D8[-]:AT1G80360.1	0.999996
AT2G01100.3	TAS4-3'D8[-]	952	6	0.120566	0.403598	no	NA	TAS4-3'D8[-]:AT2G01100.3	0.999996
AT2G01270.1	TAS1B-3'D3[-]	1869	5	0.192295	0.0906288	no	AtQSOX2	TAS1B-3'D3[-]:AtQSOX2	0.999996
AT2G01350.4	TAS1A-3'D7[-]	944	5	0.450215	0.56655	no	QPT	TAS1A-3'D7[-]:QPT	0.999996
AT2G03620.2	TAS3B-5'D4[+]	1874	5	0.149563	0.715166	no	AtMGT3	TAS3B-5'D4[+]:AtMGT3	0.999996
AT2G03740.1	TAS3B-5'D1[+]	301	5.5	0.270129	0.873982	no	NA	TAS3B-5'D1[+]:AT2G03740.1	0.999996
AT2G04030.2	TAS3B-5'D9[+]	293	6	0.141932	0.875914	no	AtHsp90.5	TAS3B-5'D9[+]:AtHsp90.5	0.999996
AT2G04350.2	TAS3B-5'D8[+]	1766	6	0.16635	1.00924	no	LACS8	TAS3B-5'D8[+]:LACS8	0.999996
AT2G10410.1	TAS3A-5'D4[-]	62	5	0.175507	0.0727931	no	SADHU1-1	TAS3A-5'D4[-]:SADHU1-1	0.999996
AT2G11910.2	TAS3C-5'D3[-]	669	4	0.370855	0.606823	no	NA	TAS3C-5'D3[-]:AT2G11910.2	0.999996
AT2G13975.2	TAS3A-5'D4[-]	13	4	0.0259446	0.201075	no	NA	TAS3A-5'D4[-]:AT2G13975.2	0.999996
AT2G14680.3	TAS1C-3'D7[-]	981	4.5	0.105304	0.570161	no	MEE13	TAS1C-3'D7[-]:MEE13	0.999996
AT2G16900.3	TAS2-3'D6[-]	1506	6	0.123618	0.807069	no	NA	TAS2-3'D6[-]:AT2G16900.3	0.999996
AT2G17710.1	TAS3C-5'D1[+]	375	5.5	0.146511	0.785619	no	NA	TAS3C-5'D1[+]:AT2G17710.1	0.999996
AT2G18020.1	TAS3C-5'D10[-]	425	6	0.399852	0.500067	no	EMB2296	TAS3C-5'D10[-]:EMB2296	0.999996
AT2G18630.1	TAS4-3'D6[+]	1579	6	0.105304	0.765388	no	NA	TAS4-3'D6[+]:AT2G18630.1	0.999996
AT2G19110.1	TAS1A-3'D9[-]	2223	4.5	0.352541	0.821933	no	ATHMA4	TAS1A-3'D9[-]:ATHMA4	0.999996
AT2G19260.1	TAS3B-5'D1[+]	1186	6	0.149563	0.996033	no	NA	TAS3B-5'D1[+]:AT2G19260.1	0.999996
AT2G19310.1	TAS1A-3'D7[-]	23	5.5	0.177034	0.747877	no	NA	TAS1A-3'D7[-]:AT2G19310.1	0.999996
AT2G19480.3	TAS3A-5'D1[+]	1195	5.5	1.30486	0.489505	no	NAP1;2	TAS3A-5'D1[+]:NAP1;2	0.999996
AT2G19760.1	TAS2-3'D3[-]	645	4	0.637931	0.767565	no	PFN1	TAS2-3'D3[-]:PFN1	0.999996
AT2G19760.1	TAS3C-5'D3[+]	93	5.5	0.172455	0.870784	no	PFN1	TAS3C-5'D3[+]:PFN1	0.999996
AT2G20210.1	TAS3C-5'D1[+]	15	6	0.361698	0.587681	no	NA	TAS3C-5'D1[+]:AT2G20210.1	0.999996
AT2G20280.1	TAS3B-5'D1[+]	410	6	0.0900429	0.666742	no	NA	TAS3B-5'D1[+]:AT2G20280.1	0.999996
AT2G20580.1	TAS3B-5'D7[+]	2900	5.5	0.468528	0.797719	no	ATRPN1A	TAS3B-5'D7[+]:ATRPN1A	0.999996
AT2G20700.1	TAS3B-5'D7[+]	56	5	0.0717291	0.910534	no	LLG2	TAS3B-5'D7[+]:LLG2	0.999996
AT2G21320.1	TAS2-3'D3[+]	772	5.5	0.155667	0.73288	no	BBX18	TAS2-3'D3[+]:BBX18	0.999996
AT2G21385.4	TAS1B-3'D4[+]	826	5	0.694399	0.810252	no	NA	TAS1B-3'D4[+]:AT2G21385.4	0.999996
AT2G21600.1	TAS3C-5'D8[-]	859	6	0.184664	0.656585	no	ATRER1B	TAS3C-5'D8[-]:ATRER1B	0.999996
AT2G21660.2	TAS4-3'D2[-]	542	5.5	1.16598	0.373363	no	ATGRP7	TAS4-3'D2[-]:ATGRP7	0.999996
AT2G21790.1	TAS3B-5'D9[+]	1133	5.5	0.13888	0.944321	no	ATRNR1	TAS3B-5'D9[+]:ATRNR1	0.999996
AT2G22430.1	TAS3C-5'D9[-]	1209	6	0.235027	0.639595	no	ATHB6	TAS3C-5'D9[-]:ATHB6	0.999996
AT2G22795.1	TAS3B-5'D9[+]	1697	5.5	0.0457845	0.680992	no	NA	TAS3B-5'D9[+]:AT2G22795.1	0.999996
AT2G22795.1	TAS3C-5'D3[+]	814	6	0.17856	0.488686	no	NA	TAS3C-5'D3[+]:AT2G22795.1	0.999996
AT2G23610.1	TAS1B-3'D2[+]	535	6	0.105304	0.788727	no	ATMES3	TAS1B-3'D2[+]:ATMES3	0.999996
AT2G24020.2	TAS1C-3'D1[-]	269	5	0.0915691	0.502897	no	NA	TAS1C-3'D1[-]:AT2G24020.2	0.999996
AT2G24360.1	TAS3C-5'D3[+]	1643	6	0.0930952	0.73745	no	NA	TAS3C-5'D3[+]:AT2G24360.1	0.999996
AT2G25210.1	TAS3C-5'D4[-]	298	4	0.1984	0.614796	no	NA	TAS3C-5'D4[-]:AT2G25210.1	0.999996
AT2G25590.1	TAS1B-3'D4[+]	1162	5	0.15872	0.710075	no	NA	TAS1B-3'D4[+]:AT2G25590.1	0.999996
AT2G25730.2	TAS3C-5'D3[+]	540	6	0.0824122	1.08241	no	NA	TAS3C-5'D3[+]:AT2G25730.2	0.999996
AT2G25900.2	TAS2-3'D8[-]	709	5.5	0.326596	0.879584	no	ATCTH	TAS2-3'D8[-]:ATCTH	0.999996
AT2G26430.3	TAS3B-5'D7[+]	1221	6	0.129723	0.84191	no	ATRCY1	TAS3B-5'D7[+]:ATRCY1	0.999996
AT2G27228.1	TAS3B-5'D7[+]	434	6	0.117514	0.701891	no	CPuORF6	TAS3B-5'D7[+]:CPuORF6	0.999996
AT2G27230.2	TAS3B-5'D7[+]	433	6	0.117514	0.701891	no	LHW	TAS3B-5'D7[+]:LHW	0.999996
AT2G27510.1	TAS3A-5'D7[+]	268	6	0.111409	0.61133	no	ATFD3	TAS3A-5'D7[+]:ATFD3	0.999996
AT2G28310.3	TAS3B-5'D9[+]	1103	6	0.163298	0.766657	no	NA	TAS3B-5'D9[+]:AT2G28310.3	0.999996
AT2G28320.1	TAS3A-5'D5[+]	2101	5.5	0.152615	0.810135	no	NA	TAS3A-5'D5[+]:AT2G28320.1	0.999996
AT2G28620.1	TAS3C-5'D1[+]	2943	6	0.108357	0.729715	no	NA	TAS3C-5'D1[+]:AT2G28620.1	0.999996
AT2G28910.1	TAS3B-5'D7[+]	560	5.5	0.74934	0.587141	no	CXIP4	TAS3B-5'D7[+]:CXIP4	0.999996
AT2G28910.1	TAS3B-5'D7[+]	809	6	0.11904	0.461378	no	CXIP4	TAS3B-5'D7[+]:CXIP4	0.999996
AT2G29210.1	TAS3C-5'D9[+]	384	6	0.282338	0.896505	no	NA	TAS3C-5'D9[+]:AT2G29210.1	0.999996
AT2G29570.1	TAS1C-3'D6[-]	542	5	0.192295	0.791338	no	ATPCNA2	TAS1C-3'D6[-]:ATPCNA2	0.999996
AT2G29690.1	TAS3B-5'D9[+]	294	6	0.164824	0.940831	no	ASA2	TAS3B-5'D9[+]:ASA2	0.999996
AT2G32580.2	TAS3C-5'D2[+]	909	5	0.146511	0.81019	no	NA	TAS3C-5'D2[+]:AT2G32580.2	0.999996
AT2G33120.3	TAS3C-5'D10[-]	259	6	0.157194	0.839467	no	ATVAMP722	TAS3C-5'D10[-]:ATVAMP722	0.999996
AT2G33150.1	TAS3B-5'D7[-]	1589	5	0.241132	0.934501	no	KAT2	TAS3B-5'D7[-]:KAT2	0.999996
AT2G33400.1	TAS4-3'D9[+]	777	5.5	0.160246	0.852058	no	NA	TAS4-3'D9[+]:AT2G33400.1	0.999996
AT2G33590.1	TAS3C-5'D3[+]	1093	5	0.132775	0.787741	no	AtCRL1	TAS3C-5'D3[+]:AtCRL1	0.999996
AT2G33860.1	TAS3C-5'D2[-]	2212	4.5	0.125144	0.175985	yes	ARF3	TAS3C-5'D2[-]:ARF3	0.999996
AT2G33980.1	TAS2-3'D4[-]	1633	5.5	0.44411	0.849225	no	atnudt22	TAS2-3'D4[-]:atnudt22	0.999996
AT2G34200.1	TAS3B-5'D9[+]	742	6	0.180086	1.04599	no	NA	TAS3B-5'D9[+]:AT2G34200.1	0.999996
AT2G34450.2	TAS3C-5'D3[+]	37	6	0.268603	0.994021	no	NA	TAS3C-5'D3[+]:AT2G34450.2	0.999996
AT2G34730.2	TAS3B-5'D9[+]	1830	6	0.135827	0.982832	no	NA	TAS3B-5'D9[+]:AT2G34730.2	0.999996
AT2G35260.1	TAS3C-5'D3[+]	1038	6	0.141932	0.68757	no	NA	TAS3C-5'D3[+]:AT2G35260.1	0.999996
AT2G35610.1	TAS1B-3'D1[-]	1705	5.5	0.109883	0.879117	no	XEG113	TAS1B-3'D1[-]:XEG113	0.999996
AT2G35630.1	TAS2-3'D7[+]	6075	5	0.122092	0.788682	no	GEM1	TAS2-3'D7[+]:GEM1	0.999996
AT2G36160.1	TAS1B-3'D4[-]	536	5.5	0.692873	0.559308	no	NA	TAS1B-3'D4[-]:AT2G36160.1	0.999996
AT2G36240.1	TAS2-3'D9[-]	929	6	0.231975	0.826041	no	NA	TAS2-3'D9[-]:AT2G36240.1	0.999996
AT2G37340.3	TAS4-3'D5[+]	442	6	1.17972	0.14794	no	AT-RS2Z33	TAS4-3'D5[+]:AT-RS2Z33	0.999996
AT2G37340.3	TAS3B-5'D7[+]	860	6	0.318966	0.790532	no	AT-RS2Z33	TAS3B-5'D7[+]:AT-RS2Z33	0.999996
AT2G38290.2	TAS4-3'D3[-]	853	6	0.111409	0.975879	no	AMT2	TAS4-3'D3[-]:AMT2	0.999996
AT2G38800.1	TAS1B-3'D3[+]	813	4.5	0.152615	0.914069	no	NA	TAS1B-3'D3[+]:AT2G38800.1	0.999996
AT2G39090.2	TAS3C-5'D8[-]	1369	6	0.2976	0.754938	no	APC7	TAS3C-5'D8[-]:APC7	0.999996
AT2G39260.1	TAS3C-5'D4[+]	903	5	0.24571	0.952172	no	NA	TAS3C-5'D4[+]:AT2G39260.1	0.999996
AT2G39280.2	TAS3C-5'D5[+]	1024	5.5	0.132775	0.897249	no	NA	TAS3C-5'D5[+]:AT2G39280.2	0.999996
AT2G39675.1	TAS1A-3'D9[-]	471	4	0.236553	0.324066	no	TAS1c	TAS1A-3'D9[-]:TAS1c	0.999996
AT2G39675.1	TAS1A-3'D10[-]	492	3	0.1984	0.0670846	no	TAS1c	TAS1A-3'D10[-]:TAS1c	0.999996
AT2G39675.1	TAS1A-3'D10[-]	631	4	1.13698	0.115998	no	TAS1c	TAS1A-3'D10[-]:TAS1c	0.999996
AT2G39730.3	TAS2-3'D8[-]	283	5	0.393747	0.556095	no	RCA	TAS2-3'D8[-]:RCA	0.999996
AT2G39770.2	TAS4-3'D10[-]	1243	6	0.11904	0.805546	no	CYT1	TAS4-3'D10[-]:CYT1	0.999996
AT2G40205.1	TAS3B-5'D9[-]	105	4	0.34491	0.432778	no	NA	TAS3B-5'D9[-]:AT2G40205.1	0.999996
AT2G40590.1	TAS3A-5'D4[+]	59	6	0.108357	0.464872	no	NA	TAS3A-5'D4[+]:AT2G40590.1	0.999996
AT2G40650.1	TAS3C-5'D3[+]	1134	4	0.146511	0.783163	no	NA	TAS3C-5'D3[+]:AT2G40650.1	0.999996
AT2G41220.1	TAS3A-5'D9[-]	2768	3.5	0.123618	0.654879	no	GLU2	TAS3A-5'D9[-]:GLU2	0.999996
AT2G41310.1	TAS3C-5'D1[+]	510	6	0.148037	0.787489	no	ARR8	TAS3C-5'D1[+]:ARR8	0.999996
AT2G41870.1	TAS3C-5'D1[+]	691	6	0.102252	0.710699	no	NA	TAS3C-5'D1[+]:AT2G41870.1	0.999996
AT2G41905.1	TAS4-3'D9[+]	92	6	0.673033	0.818553	no	NA	TAS4-3'D9[+]:AT2G41905.1	0.999996
AT2G42010.1	TAS3C-5'D5[+]	2276	5.5	0.134301	0.944108	no	PLDBETA	TAS3C-5'D5[+]:PLDBETA	0.999996
AT2G42190.1	TAS3C-5'D3[+]	480	5	0.193821	0.929866	no	NA	TAS3C-5'D3[+]:AT2G42190.1	0.999996
AT2G44670.1	TAS4-3'D5[+]	731	4.5	0.163298	0.662104	no	NA	TAS4-3'D5[+]:AT2G44670.1	0.999996
AT2G44798.2	TAS3A-5'D4[-]	820	6	0.135827	0.441623	no	NA	TAS3A-5'D4[-]:AT2G44798.2	0.999996
AT2G45070.4	TAS3C-5'D8[-]	201	5.5	0.213661	0.719519	no	SEC61 BETA	TAS3C-5'D8[-]:SEC61 BETA	0.999996
AT2G45960.3	TAS1B-3'D4[+]	1185	6	0.126671	0.46162	no	ATHH2	TAS1B-3'D4[+]:ATHH2	0.999996
AT2G46000.1	TAS3B-5'D8[+]	614	4.5	0.111409	0.879263	no	NA	TAS3B-5'D8[+]:AT2G46000.1	0.999996
AT2G46450.3	TAS3B-5'D9[+]	1127	5.5	0.239606	0.745011	no	ATCNGC12	TAS3B-5'D9[+]:ATCNGC12	0.999996
AT2G47350.2	TAS3B-5'D7[+]	39	4.5	0.129723	0.153411	no	NA	TAS3B-5'D7[+]:AT2G47350.2	0.999996
AT2G47620.1	TAS1C-3'D9[+]	1485	4.5	0.105304	0.822776	no	ATSWI3A	TAS1C-3'D9[+]:ATSWI3A	0.999996
AT2G47940.2	TAS3C-5'D2[+]	2205	5.5	0.152615	0.469315	no	DEG2	TAS3C-5'D2[+]:DEG2	0.999996
AT3G02080.1	TAS1C-3'D7[-]	447	5	0.694399	0.570747	no	NA	TAS1C-3'D7[-]:AT3G02080.1	0.999996
AT3G02200.2	TAS3C-5'D4[+]	1119	6	0.210609	0.80268	no	NA	TAS3C-5'D4[+]:AT3G02200.2	0.999996
AT3G02660.1	TAS1A-3'D3[-]	1218	6	0.30523	0.912509	no	EMB2768	TAS1A-3'D3[-]:EMB2768	0.999996
AT3G02760.1	TAS3B-5'D6[+]	522	5.5	0.187717	0.907844	no	NA	TAS3B-5'D6[+]:AT3G02760.1	0.999996
AT3G03330.1	TAS3A-5'D8[-]	1174	5	0.117514	0.385747	no	NA	TAS3A-5'D8[-]:AT3G03330.1	0.999996
AT3G03750.2	TAS3C-5'D1[+]	1024	5.5	0.131249	0.867719	no	SDG20	TAS3C-5'D1[+]:SDG20	0.999996
AT3G03940.1	TAS3B-5'D1[+]	2271	5	0.175507	0.876029	no	NA	TAS3B-5'D1[+]:AT3G03940.1	0.999996
AT3G03970.3	TAS2-3'D3[+]	2419	6	0.154141	0.926493	no	NA	TAS2-3'D3[+]:AT3G03970.3	0.999996
AT3G04400.2	TAS3C-5'D8[+]	574	5.5	0.587568	0.228915	no	emb2171	TAS3C-5'D8[+]:emb2171	0.999996
AT3G04920.1	TAS3A-5'D8[+]	255	5	2.17934	0.8156	no	NA	TAS3A-5'D8[+]:AT3G04920.1	0.999996
AT3G05020.1	TAS3C-5'D3[+]	258	5.5	0.190769	0.598234	no	ACP	TAS3C-5'D3[+]:ACP	0.999996
AT3G05060.1	TAS3C-5'D3[+]	1690	6	1.25602	0.939613	no	NA	TAS3C-5'D3[+]:AT3G05060.1	0.999996
AT3G05932.1	TAS4-3'D6[+]	503	6	0.105304	0.808088	no	NA	TAS4-3'D6[+]:AT3G05932.1	0.999996
AT3G06050.1	TAS1A-3'D7[+]	803	5.5	0.106831	0.486335	no	ATPRXIIF	TAS1A-3'D7[+]:ATPRXIIF	0.999996
AT3G06130.2	TAS3B-5'D9[+]	633	4	0.0946214	0.903052	no	NA	TAS3B-5'D9[+]:AT3G06130.2	0.999996
AT3G06350.1	TAS2-3'D6[+]	1341	5.5	0.160246	0.869602	no	EMB3004	TAS2-3'D6[+]:EMB3004	0.999996
AT3G06530.3	TAS2-3'D3[+]	5321	6	0.149563	1.03718	no	NA	TAS2-3'D3[+]:AT3G06530.3	0.999996
AT3G06760.2	TAS3C-5'D8[-]	858	6	0.32507	0.659137	no	NA	TAS3C-5'D8[-]:AT3G06760.2	0.999996
AT3G08610.1	TAS1A-3'D7[-]	32	6	0.143458	0.343966	no	NA	TAS1A-3'D7[-]:AT3G08610.1	0.999996
AT3G09735.1	TAS3C-5'D3[+]	291	5.5	0.109883	0.600907	no	NA	TAS3C-5'D3[+]:AT3G09735.1	0.999996
AT3G09980.1	TAS1B-3'D9[-]	260	5.5	0.15872	0.776923	no	NA	TAS1B-3'D9[-]:AT3G09980.1	0.999996
AT3G10570.1	TAS4-3'D9[+]	1554	6	0.0885168	0.660873	no	CYP77A6	TAS4-3'D9[+]:CYP77A6	0.999996
AT3G11490.1	TAS3C-5'D8[-]	1102	6	0.13888	0.893445	no	NA	TAS3C-5'D8[-]:AT3G11490.1	0.999996
AT3G11500.1	TAS4-3'D9[+]	286	4	0.494473	0.64541	no	NA	TAS4-3'D9[+]:AT3G11500.1	0.999996
AT3G13000.2	TAS1C-3'D6[-]	2259	6	0.250289	0.771966	no	NA	TAS1C-3'D6[-]:AT3G13000.2	0.999996
AT3G13065.1	TAS2-3'D1[+]	2110	6	0.193821	0.896817	no	SRF4	TAS2-3'D1[+]:SRF4	0.999996
AT3G13175.1	TAS3A-5'D4[-]	205	5.5	0.164824	0.938517	no	NA	TAS3A-5'D4[-]:AT3G13175.1	0.999996
AT3G13350.1	TAS4-3'D6[+]	680	6	0.123618	0.250828	no	NA	TAS4-3'D6[+]:AT3G13350.1	0.999996
AT3G13460.4	TAS1B-3'D5[-]	1090	5	0.20603	1.03267	no	ECT2	TAS1B-3'D5[-]:ECT2	0.999996
AT3G14205.1	TAS3B-5'D9[+]	1847	6	0.175507	0.762433	no	NA	TAS3B-5'D9[+]:AT3G14205.1	0.999996
AT3G15550.1	TAS4-3'D8[-]	974	6	0.183138	0.971186	no	NA	TAS4-3'D8[-]:AT3G15550.1	0.999996
AT3G16170.1	TAS1B-3'D9[-]	1409	5.5	1.64672	0.702907	no	AAE13	TAS1B-3'D9[-]:AAE13	0.999996
AT3G17185.2	TAS3C-5'D10[-]	618	6	0.103778	0.111144	no	TAS3a	TAS3C-5'D10[-]:TAS3a	0.999996
AT3G17820.1	TAS3C-5'D2[-]	1272	6	0.216713	0.619341	no	ATGSKB6	TAS3C-5'D2[-]:ATGSKB6	0.999996
AT3G17930.1	TAS3A-5'D5[+]	684	4	0.151089	0.743651	no	DAC	TAS3A-5'D5[+]:DAC	0.999996
AT3G17998.1	TAS3A-5'D1[+]	1550	6	0.434953	0.250649	no	CPuORF30	TAS3A-5'D1[+]:CPuORF30	0.999996
AT3G18000.1	TAS3A-5'D1[+]	1550	6	0.434953	0.250649	no	NMT1	TAS3A-5'D1[+]:NMT1	0.999996
AT3G19180.2	TAS3C-5'D2[+]	2690	6	0.151089	0.907367	no	ARC6H	TAS3C-5'D2[+]:ARC6H	0.999996
AT3G21190.1	TAS1A-3'D8[+]	1329	5.5	0.132775	0.826327	no	AtMSR1	TAS1A-3'D8[+]:AtMSR1	0.999996
AT3G21480.1	TAS3C-5'D2[+]	1041	6	0.108357	0.983745	no	NA	TAS3C-5'D2[+]:AT3G21480.1	0.999996
AT3G22290.1	TAS3C-5'D2[+]	639	5.5	0.126671	0.716572	no	NA	TAS3C-5'D2[+]:AT3G22290.1	0.999996
AT3G22320.1	TAS3B-5'D2[+]	823	5.5	0.13888	0.582892	no	ATRPABC24.3	TAS3B-5'D2[+]:ATRPABC24.3	0.999996
AT3G23400.1	TAS3A-5'D8[+]	729	5.5	0.125144	0.697326	no	FIB4	TAS3A-5'D8[+]:FIB4	0.999996
AT3G23890.2	TAS3C-5'D2[+]	1744	6	0.125144	0.952211	no	ATTOPII	TAS3C-5'D2[+]:ATTOPII	0.999996
AT3G24080.2	TAS3C-5'D3[+]	1027	6	0.181612	0.62832	no	NA	TAS3C-5'D3[+]:AT3G24080.2	0.999996
AT3G24080.2	TAS3C-5'D3[+]	388	5.5	0.270129	0.444516	no	NA	TAS3C-5'D3[+]:AT3G24080.2	0.999996
AT3G24100.1	TAS3C-5'D2[+]	156	6	0.117514	0.722673	no	NA	TAS3C-5'D2[+]:AT3G24100.1	0.999996
AT3G25221.1	TAS1A-3'D4[-]	74	6	0.148037	0.921593	no	NA	TAS1A-3'D4[-]:AT3G25221.1	0.999996
AT3G25410.1	TAS4-3'D7[-]	1600	6	0.13888	0.37345	no	NA	TAS4-3'D7[-]:AT3G25410.1	0.999996
AT3G25440.2	TAS3C-5'D8[-]	1039	6	0.172455	0.857182	no	LOH1	TAS3C-5'D8[-]:LOH1	0.999996
AT3G27260.2	TAS3A-5'D3[+]	1966	5.5	0.131249	0.868736	no	GTE8	TAS3A-5'D3[+]:GTE8	0.999996
AT3G27820.1	TAS3C-5'D4[+]	1325	6	0.155667	0.80881	no	ATMDAR4	TAS3C-5'D4[+]:ATMDAR4	0.999996
AT3G27850.1	TAS3B-5'D7[+]	52	4	0.128197	0.314005	no	RPL12-C	TAS3B-5'D7[+]:RPL12-C	0.999996
AT3G29200.1	TAS4-3'D9[+]	1325	5.5	0.201452	0.696525	no	ATCM1	TAS4-3'D9[+]:ATCM1	0.999996
AT3G44735.2	TAS3C-5'D9[+]	497	6	0.180086	0.851362	no	ATPSK3	TAS3C-5'D9[+]:ATPSK3	0.999996
AT3G44890.1	TAS3C-5'D3[+]	718	6	0.117514	0.593754	no	RPL9	TAS3C-5'D3[+]:RPL9	0.999996
AT3G47000.1	TAS3C-5'D3[+]	20	5.5	0.441058	0.354679	no	NA	TAS3C-5'D3[+]:AT3G47000.1	0.999996
AT3G47340.3	TAS3C-5'D9[-]	2225	3.5	0.140406	0.755368	no	ASN1	TAS3C-5'D9[-]:ASN1	0.999996
AT3G48340.1	TAS1A-3'D9[-]	902	5.5	0.154141	0.848526	no	CEP2	TAS1A-3'D9[-]:CEP2	0.999996
AT3G48570.1	TAS3C-5'D4[-]	367	6	0.190769	0.967752	no	NA	TAS3C-5'D4[-]:AT3G48570.1	0.999996
AT3G48930.1	TAS3B-5'D9[+]	175	5.5	0.172455	0.379521	no	EMB1080	TAS3B-5'D9[+]:EMB1080	0.999996
AT3G49250.1	TAS1C-3'D5[-]	850	6	0.181612	0.879579	no	DMS3	TAS1C-3'D5[-]:DMS3	0.999996
AT3G49800.1	TAS2-3'D1[-]	1202	4	0.132775	0.765796	no	NA	TAS2-3'D1[-]:AT3G49800.1	0.999996
AT3G49910.1	TAS1C-3'D6[+]	581	5	0.723396	0.121879	no	NA	TAS1C-3'D6[+]:AT3G49910.1	0.999996
AT3G50380.1	TAS1A-3'D5[-]	8406	4.5	0.27776	0.791164	no	NA	TAS1A-3'D5[-]:AT3G50380.1	0.999996
AT3G50890.1	TAS3B-5'D7[+]	692	4.5	0.334227	0.692062	no	AtHB28	TAS3B-5'D7[+]:AtHB28	0.999996
AT3G51370.2	TAS4-3'D1[+]	396	5	0.132775	0.683942	no	NA	TAS4-3'D1[+]:AT3G51370.2	0.999996
AT3G51840.1	TAS3A-5'D9[+]	354	6	0.213661	0.92444	no	ACX4	TAS3A-5'D9[+]:ACX4	0.999996
AT3G52260.3	TAS4-3'D5[+]	948	6	0.141932	0.846196	no	NA	TAS4-3'D5[+]:AT3G52260.3	0.999996
AT3G52300.2	TAS3B-5'D5[+]	377	6	0.271655	0.346572	no	ATPQ	TAS3B-5'D5[+]:ATPQ	0.999996
AT3G52870.1	TAS3C-5'D4[+]	603	6	0.120566	0.924456	no	NA	TAS3C-5'D4[+]:AT3G52870.1	0.999996
AT3G53260.1	TAS4-3'D4[-]	2004	4.5	0.135827	0.650424	no	ATPAL2	TAS4-3'D4[-]:ATPAL2	0.999996
AT3G53270.6	TAS4-3'D3[+]	1237	4.5	0.27776	0.859378	no	NA	TAS4-3'D3[+]:AT3G53270.6	0.999996
AT3G53440.2	TAS3C-5'D3[+]	771	6	0.0930952	0.876413	no	NA	TAS3C-5'D3[+]:AT3G53440.2	0.999996
AT3G53580.1	TAS1A-3'D3[+]	875	5.5	0.215187	0.822359	no	NA	TAS1A-3'D3[+]:AT3G53580.1	0.999996
AT3G53750.1	TAS3B-5'D7[-]	1371	4.5	0.289969	0.846731	no	ACT3	TAS3B-5'D7[-]:ACT3	0.999996
AT3G53880.1	TAS4-3'D7[+]	386	5	0.163298	0.772093	no	AKR4C11	TAS4-3'D7[+]:AKR4C11	0.999996
AT3G53930.2	TAS3B-5'D3[-]	1445	5	0.152615	0.915176	no	NA	TAS3B-5'D3[-]:AT3G53930.2	0.999996
AT3G54010.2	TAS3C-5'D3[+]	1569	6	0.103778	0.803386	no	DEI1	TAS3C-5'D3[+]:DEI1	0.999996
AT3G54080.1	TAS1A-3'D10[-]	1213	5	0.132775	0.644172	no	NA	TAS1A-3'D10[-]:AT3G54080.1	0.999996
AT3G54920.1	TAS3B-5'D7[+]	29	6	0.0839383	0.385532	no	PMR6	TAS3B-5'D7[+]:PMR6	0.999996
AT3G55520.1	TAS4-3'D1[-]	255	5	0.128197	0.0865096	no	NA	TAS4-3'D1[-]:AT3G55520.1	0.999996
AT3G56860.5	TAS3A-5'D1[+]	66	5.5	0.639457	0.134968	no	UBA2A	TAS3A-5'D1[+]:UBA2A	0.999996
AT3G57000.1	TAS1C-3'D10[+]	307	6	0.260972	0.851583	no	NA	TAS1C-3'D10[+]:AT3G57000.1	0.999996
AT3G57290.1	TAS3C-5'D3[-]	1503	5	0.212135	0.575855	no	ATEIF3E-1	TAS3C-5'D3[-]:ATEIF3E-1	0.999996
AT3G58140.1	TAS2-3'D9[+]	1136	5.5	0.134301	0.808538	no	NA	TAS2-3'D9[+]:AT3G58140.1	0.999996
AT3G58220.2	TAS3B-5'D2[+]	538	6	0.106831	0.807402	no	NA	TAS3B-5'D2[+]:AT3G58220.2	0.999996
AT3G59020.2	TAS4-3'D9[-]	3608	6	0.215187	0.906631	no	NA	TAS4-3'D9[-]:AT3G59020.2	0.999996
AT3G59830.1	TAS3C-5'D4[+]	1102	6	0.241132	0.872351	no	NA	TAS3C-5'D4[+]:AT3G59830.1	0.999996
AT3G59940.1	TAS3A-5'D2[-]	1325	6	0.11904	0.939762	no	NA	TAS3A-5'D2[-]:AT3G59940.1	0.999996
AT3G60360.1	TAS3C-5'D2[+]	640	5.5	0.309809	0.86148	no	EDA14	TAS3C-5'D2[+]:EDA14	0.999996
AT3G60600.3	TAS3C-5'D9[-]	103	4.5	0.192295	0.921013	no	(AT)VAP	TAS3C-5'D9[-]:(AT)VAP	0.999996
AT3G62940.3	TAS3B-5'D7[+]	679	6	0.160246	0.873598	no	NA	TAS3B-5'D7[+]:AT3G62940.3	0.999996
AT4G00730.2	TAS2-3'D5[-]	3118	5.5	0.146511	0.847672	no	AHDP	TAS2-3'D5[-]:AHDP	0.999996
AT4G00830.4	TAS3C-5'D3[+]	475	5.5	0.0976737	0.523754	no	LIF2	TAS3C-5'D3[+]:LIF2	0.999996
AT4G00990.1	TAS3C-5'D3[+]	184	6	0.0961475	0.922903	no	NA	TAS3C-5'D3[+]:AT4G00990.1	0.999996
AT4G01000.1	TAS3A-5'D4[+]	964	5.5	0.141932	0.786595	no	NA	TAS3A-5'D4[+]:AT4G01000.1	0.999996
AT4G03020.2	TAS4-3'D8[-]	378	5	0.131249	0.870777	no	NA	TAS4-3'D8[-]:AT4G03020.2	0.999996
AT4G04460.2	TAS1C-3'D7[-]	904	5	0.131249	0.68365	no	NA	TAS1C-3'D7[-]:AT4G04460.2	0.999996
AT4G04640.1	TAS4-3'D9[-]	1325	6	0.619617	0.756816	no	ATPC1	TAS4-3'D9[-]:ATPC1	0.999996
AT4G10280.1	TAS4-3'D1[+]	263	6	0.195347	0.923371	no	NA	TAS4-3'D1[+]:AT4G10280.1	0.999996
AT4G10360.2	TAS3B-5'D2[+]	1125	5	0.326596	0.918625	no	NA	TAS3B-5'D2[+]:AT4G10360.2	0.999996
AT4G10790.1	TAS3A-5'D6[+]	1076	5	0.109883	0.911054	no	NA	TAS3A-5'D6[+]:AT4G10790.1	0.999996
AT4G11260.1	TAS3B-5'D9[-]	1239	6	0.181612	0.770205	no	ATSGT1B	TAS3B-5'D9[-]:ATSGT1B	0.999996
AT4G11560.1	TAS3C-5'D3[+]	231	6	0.286916	1.0446	no	NA	TAS3C-5'D3[+]:AT4G11560.1	0.999996
AT4G12960.2	TAS3C-5'D4[+]	304	6	0.282338	0.762303	no	AtGILT	TAS3C-5'D4[+]:AtGILT	0.999996
AT4G13540.1	TAS3B-5'D7[+]	163	5.5	0.190769	0.652245	no	NA	TAS3B-5'D7[+]:AT4G13540.1	0.999996
AT4G13730.3	TAS1C-3'D5[+]	1293	6	0.137354	0.848561	no	NA	TAS1C-3'D5[+]:AT4G13730.3	0.999996
AT4G14110.1	TAS1C-3'D4[-]	735	4	0.18619	0.765573	no	COP9	TAS1C-3'D4[-]:COP9	0.999996
AT4G14360.2	TAS3C-5'D9[+]	2249	5.5	0.184664	0.736304	no	NA	TAS3C-5'D9[+]:AT4G14360.2	0.999996
AT4G15110.1	TAS3C-5'D3[+]	1798	6	0.160246	0.636057	no	CYP97B3	TAS3C-5'D3[+]:CYP97B3	0.999996
AT4G15545.1	TAS3C-5'D3[+]	338	5	0.160246	0.444263	no	NA	TAS3C-5'D3[+]:AT4G15545.1	0.999996
AT4G16141.1	TAS1B-3'D4[+]	153	5	0.183138	0.794923	no	NA	TAS1B-3'D4[+]:AT4G16141.1	0.999996
AT4G16144.1	TAS3B-5'D5[+]	463	5.5	0.163298	0.610164	no	AMSH3	TAS3B-5'D5[+]:AMSH3	0.999996
AT4G16155.1	TAS3B-5'D9[+]	1564	6	0.146511	0.629581	no	NA	TAS3B-5'D9[+]:AT4G16155.1	0.999996
AT4G17240.2	TAS3C-5'D8[-]	1016	6	0.0991998	0.962579	no	NA	TAS3C-5'D8[-]:AT4G17240.2	0.999996
AT4G17240.2	TAS1B-3'D8[-]	1211	4	0.0946214	0.878713	no	NA	TAS1B-3'D8[-]:AT4G17240.2	0.999996
AT4G18480.1	TAS3B-5'D3[+]	949	4.5	0.233501	0.548242	no	CH-42	TAS3B-5'D3[+]:CH-42	0.999996
AT4G19490.2	TAS1C-3'D1[+]	3411	5	0.38459	0.349579	no	ATVPS54	TAS1C-3'D1[+]:ATVPS54	0.999996
AT4G20070.1	TAS3C-5'D3[-]	1754	5	0.280812	0.466962	no	AAH	TAS3C-5'D3[-]:AAH	0.999996
AT4G21430.1	TAS3C-5'D1[+]	1639	5	0.134301	0.554559	no	B160	TAS3C-5'D1[+]:B160	0.999996
AT4G23420.3	TAS3C-5'D2[+]	1645	5	0.140406	0.975204	no	NA	TAS3C-5'D2[+]:AT4G23420.3	0.999996
AT4G23860.3	TAS3B-5'D7[-]	1668	4.5	0.267076	0.909115	no	NA	TAS3B-5'D7[-]:AT4G23860.3	0.999996
AT4G24000.1	TAS3B-5'D7[+]	706	5	0.123618	0.935217	no	ATCSLG2	TAS3B-5'D7[+]:ATCSLG2	0.999996
AT4G25080.5	TAS1A-3'D9[-]	1012	5	0.474633	0.812486	no	CHLM	TAS1A-3'D9[-]:CHLM	0.999996
AT4G25130.1	TAS1B-3'D3[+]	59	6	0.146511	0.893016	no	MSRA4	TAS1B-3'D3[+]:MSRA4	0.999996
AT4G25230.2	TAS1B-3'D3[+]	940	5.5	0.120566	0.842753	no	RIN2	TAS1B-3'D3[+]:RIN2	0.999996
AT4G25370.1	TAS3B-5'D10[+]	775	5	0.149563	0.594395	no	NA	TAS3B-5'D10[+]:AT4G25370.1	0.999996
AT4G25600.1	TAS1B-3'D10[+]	158	6	0.0854645	0.948017	no	NA	TAS1B-3'D10[+]:AT4G25600.1	0.999996
AT4G25650.2	TAS1A-3'D7[-]	1283	6	0.128197	0.835074	no	ACD1-LIKE	TAS1A-3'D7[-]:ACD1-LIKE	0.999996
AT4G26070.3	TAS1A-3'D4[+]	1192	6	0.20603	0.754594	no	ATMEK1	TAS1A-3'D4[+]:ATMEK1	0.999996
AT4G26080.1	TAS3C-5'D3[+]	1464	4	0.306756	0.835161	no	ABI1	TAS3C-5'D3[+]:ABI1	0.999996
AT4G26630.2	TAS3C-5'D3[+]	836	6	0.169403	0.526177	no	NA	TAS3C-5'D3[+]:AT4G26630.2	0.999996
AT4G26630.2	TAS3B-5'D9[+]	969	6	0.347963	0.584447	no	NA	TAS3B-5'D9[+]:AT4G26630.2	0.999996
AT4G26670.1	TAS3A-5'D7[-]	852	5	0.212135	0.934136	no	NA	TAS3A-5'D7[-]:AT4G26670.1	0.999996
AT4G26900.1	TAS3B-5'D7[+]	1314	5	0.105304	0.379733	no	AT-HF	TAS3B-5'D7[+]:AT-HF	0.999996
AT4G26910.3	TAS1C-3'D10[-]	789	4.5	0.120566	0.823841	no	NA	TAS1C-3'D10[-]:AT4G26910.3	0.999996
AT4G27500.1	TAS4-3'D8[-]	1035	5.5	0.241132	0.731174	no	PPI1	TAS4-3'D8[-]:PPI1	0.999996
AT4G27700.1	TAS3C-5'D3[-]	557	5.5	0.546362	0.0990534	no	NA	TAS3C-5'D3[-]:AT4G27700.1	0.999996
AT4G27760.1	TAS1C-3'D7[-]	722	4	0.0946214	0.73021	no	FEY	TAS1C-3'D7[-]:FEY	0.999996
AT4G27900.2	TAS3C-5'D2[+]	877	6	0.195347	0.742943	no	NA	TAS3C-5'D2[+]:AT4G27900.2	0.999996
AT4G28180.1	TAS4-3'D4[-]	197	6	0.173981	1.01585	no	NA	TAS4-3'D4[-]:AT4G28180.1	0.999996
AT4G28190.2	TAS3B-5'D7[+]	1229	6	0.213661	0.483065	no	ULT	TAS3B-5'D7[+]:ULT	0.999996
AT4G28230.1	TAS3B-5'D7[+]	1060	5	0.155667	0.979307	no	NA	TAS3B-5'D7[+]:AT4G28230.1	0.999996
AT4G28540.1	TAS4-3'D10[+]	780	6	0.183138	0.834274	no	CKL6	TAS4-3'D10[+]:CKL6	0.999996
AT4G28710.1	TAS3C-5'D8[-]	1975	6	0.134301	0.901727	no	ATXIH	TAS3C-5'D8[-]:ATXIH	0.999996
AT4G28750.1	TAS3A-5'D7[+]	329	6	1.29265	0.481605	no	PSAE-1	TAS3A-5'D7[+]:PSAE-1	0.999996
AT4G29060.2	TAS4-3'D4[+]	1144	6	0.140406	0.820927	no	emb2726	TAS4-3'D4[+]:emb2726	0.999996
AT4G29480.1	TAS2-3'D3[+]	150	6	0.280812	0.928117	no	NA	TAS2-3'D3[+]:AT4G29480.1	0.999996
AT4G29590.1	TAS1C-3'D8[-]	796	5	0.256393	0.182003	no	NA	TAS1C-3'D8[-]:AT4G29590.1	0.999996
AT4G30270.1	TAS3C-5'D1[+]	840	5.5	0.148037	0.527431	no	MERI-5	TAS3C-5'D1[+]:MERI-5	0.999996
AT4G30620.1	TAS3C-5'D7[-]	686	4	0.1984	0.70347	no	NA	TAS3C-5'D7[-]:AT4G30620.1	0.999996
AT4G30690.2	TAS3A-5'D1[+]	319	5	0.131249	0.634494	no	NA	TAS3A-5'D1[+]:AT4G30690.2	0.999996
AT4G32120.1	TAS1A-3'D5[-]	855	6	0.122092	0.659267	no	NA	TAS1A-3'D5[-]:AT4G32120.1	0.999996
AT4G32420.4	TAS3C-5'D3[+]	2613	5.5	0.338806	0.292196	no	NA	TAS3C-5'D3[+]:AT4G32420.4	0.999996
AT4G32610.1	TAS3C-5'D8[-]	455	5	0.160246	0.841681	no	NA	TAS3C-5'D8[-]:AT4G32610.1	0.999996
AT4G32850.9	TAS1A-3'D9[-]	2713	5	0.152615	0.900983	no	nPAP	TAS1A-3'D9[-]:nPAP	0.999996
AT4G33000.3	TAS3C-5'D8[-]	527	6	0.555519	0.459483	no	ATCBL10	TAS3C-5'D8[-]:ATCBL10	0.999996
AT4G33060.1	TAS3C-5'D4[+]	1705	6	0.419692	0.435458	no	NA	TAS3C-5'D4[+]:AT4G33060.1	0.999996
AT4G33080.2	TAS1C-3'D2[-]	339	6	0.456319	1.03807	no	NA	TAS1C-3'D2[-]:AT4G33080.2	0.999996
AT4G33150.3	TAS3C-5'D3[+]	1710	6	0.367802	0.759372	no	LKR	TAS3C-5'D3[+]:LKR	0.999996
AT4G33430.2	TAS2-3'D1[-]	2125	5	0.123618	0.723052	no	ATBAK1	TAS2-3'D1[-]:ATBAK1	0.999996
AT4G33530.1	TAS3C-5'D2[+]	2143	6	0.509735	0.554123	no	KUP5	TAS3C-5'D2[+]:KUP5	0.999996
AT4G33790.1	TAS3C-5'D8[-]	1417	5.5	0.143458	0.482374	no	CER4	TAS3C-5'D8[-]:CER4	0.999996
AT4G34160.1	TAS3B-5'D7[+]	285	5.5	0.241132	0.972496	no	CYCD3	TAS3B-5'D7[+]:CYCD3	0.999996
AT4G34620.1	TAS1C-3'D7[-]	524	5.5	0.912639	0.0501352	no	SSR16	TAS1C-3'D7[-]:SSR16	0.999996
AT4G34960.1	TAS4-3'D9[+]	621	5.5	0.154141	0.979281	no	NA	TAS4-3'D9[+]:AT4G34960.1	0.999996
AT4G35040.1	TAS3C-5'D2[-]	1304	4	0.148037	0.691245	no	bZIP19	TAS3C-5'D2[-]:bZIP19	0.999996
AT4G35550.1	TAS3B-5'D6[+]	730	6	0.24571	0.883147	no	ATWOX13	TAS3B-5'D6[+]:ATWOX13	0.999996
AT4G35630.1	TAS3C-5'D4[+]	694	5	0.131249	0.860667	no	PSAT	TAS3C-5'D4[+]:PSAT	0.999996
AT4G36050.2	TAS1B-3'D10[+]	2096	5.5	0.163298	0.412193	no	NA	TAS1B-3'D10[+]:AT4G36050.2	0.999996
AT4G36190.1	TAS3C-5'D3[-]	32	5	0.120566	0.270814	no	NA	TAS3C-5'D3[-]:AT4G36190.1	0.999996
AT4G36195.3	TAS1C-3'D10[+]	485	6	0.248763	1.05957	no	NA	TAS1C-3'D10[+]:AT4G36195.3	0.999996
AT4G36648.1	TAS1A-3'D2[-]	1908	6	0.753919	0.501799	no	NA	TAS1A-3'D2[-]:AT4G36648.1	0.999996
AT4G36750.1	TAS3A-5'D4[-]	924	5.5	0.320492	1.10188	no	NA	TAS3A-5'D4[-]:AT4G36750.1	0.999996
AT4G36770.1	TAS3B-5'D7[+]	1319	5.5	0.102252	0.963964	no	NA	TAS3B-5'D7[+]:AT4G36770.1	0.999996
AT4G36810.1	TAS3C-5'D1[-]	1012	5	0.115988	0.627546	no	AtGGPPS11	TAS3C-5'D1[-]:AtGGPPS11	0.999996
AT4G36960.2	TAS3A-5'D4[-]	358	4.5	0.140406	0.6956	no	NA	TAS3A-5'D4[-]:AT4G36960.2	0.999996
AT4G37180.2	TAS3A-5'D1[+]	1077	5.5	0.131249	0.697809	no	NA	TAS3A-5'D1[+]:AT4G37180.2	0.999996
AT4G38430.1	TAS1A-3'D9[-]	1755	5	0.215187	0.792879	no	ATROPGEF1	TAS1A-3'D9[-]:ATROPGEF1	0.999996
AT4G38630.1	TAS3B-5'D7[+]	1203	6	0.183138	0.611273	no	ATMCB1	TAS3B-5'D7[+]:ATMCB1	0.999996
AT4G39040.2	TAS3B-5'D7[+]	276	6	0.30523	0.688467	no	NA	TAS3B-5'D7[+]:AT4G39040.2	0.999996
AT4G39040.2	TAS3C-5'D3[+]	330	5.5	0.183138	0.545084	no	NA	TAS3C-5'D3[+]:AT4G39040.2	0.999996
AT4G39040.2	TAS3C-5'D3[+]	432	5.5	0.235027	0.608343	no	NA	TAS3C-5'D3[+]:AT4G39040.2	0.999996
AT4G39520.1	TAS3A-5'D1[-]	1584	6	0.247237	0.927376	no	NA	TAS3A-5'D1[-]:AT4G39520.1	0.999996
AT4G39520.1	TAS3B-5'D7[+]	592	5	0.222818	0.896001	no	NA	TAS3B-5'D7[+]:AT4G39520.1	0.999996
AT4G40030.3	TAS3C-5'D9[-]	826	5	0.160246	0.331514	no	NA	TAS3C-5'D9[-]:AT4G40030.3	0.999996
AT5G01410.1	TAS1C-3'D7[-]	1134	4.5	0.686768	0.750211	no	ATPDX1	TAS1C-3'D7[-]:ATPDX1	0.999996
AT5G01950.1	TAS3B-5'D8[+]	2376	6	0.149563	0.950773	no	NA	TAS3B-5'D8[+]:AT5G01950.1	0.999996
AT5G02120.1	TAS2-3'D5[+]	339	6	1.85733	0.852866	no	OHP	TAS2-3'D5[+]:OHP	0.999996
AT5G02840.3	TAS2-3'D1[-]	538	4	0.115988	0.661613	no	LCL1	TAS2-3'D1[-]:LCL1	0.999996
AT5G02880.1	TAS3C-5'D3[+]	4606	6	0.111409	0.692745	no	UPL4	TAS3C-5'D3[+]:UPL4	0.999996
AT5G03430.1	TAS3B-5'D1[+]	1366	5	0.129723	0.530167	no	NA	TAS3B-5'D1[+]:AT5G03430.1	0.999996
AT5G03670.1	TAS3A-5'D1[+]	1323	6	0.0412061	0.806202	no	TRM28	TAS3A-5'D1[+]:TRM28	0.999996
AT5G03880.1	TAS1B-3'D4[+]	537	6	0.117514	0.911609	no	NA	TAS1B-3'D4[+]:AT5G03880.1	0.999996
AT5G04140.2	TAS2-3'D4[+]	478	5.5	0.0915691	0.856329	no	FD-GOGAT	TAS2-3'D4[+]:FD-GOGAT	0.999996
AT5G05950.1	TAS2-3'D10[-]	586	4.5	0.173981	0.675816	no	MEE60	TAS2-3'D10[-]:MEE60	0.999996
AT5G06060.1	TAS3C-5'D8[-]	74	6	0.286916	0.106939	no	NA	TAS3C-5'D8[-]:AT5G06060.1	0.999996
AT5G06970.1	TAS3C-5'D6[+]	2526	4.5	0.120566	0.510513	no	NA	TAS3C-5'D6[+]:AT5G06970.1	0.999996
AT5G07130.1	TAS3B-5'D4[+]	797	6	0.114461	0.993199	no	LAC13	TAS3B-5'D4[+]:LAC13	0.999996
AT5G07180.1	TAS3C-5'D10[-]	2709	6	0.126671	0.947385	no	ERL2	TAS3C-5'D10[-]:ERL2	0.999996
AT5G07180.1	TAS3B-5'D1[+]	3246	6	0.149563	0.850888	no	ERL2	TAS3B-5'D1[+]:ERL2	0.999996
AT5G07530.2	TAS3B-5'D6[+]	635	5.5	0.763076	0.125131	no	ATGRP-7	TAS3B-5'D6[+]:ATGRP-7	0.999996
AT5G08680.1	TAS2-3'D10[+]	289	5.5	0.0030523	0.820279	no	NA	TAS2-3'D10[+]:AT5G08680.1	0.999996
AT5G09230.7	TAS1A-3'D9[-]	788	5	0.117514	0.128729	no	AtSRT2	TAS1A-3'D9[-]:AtSRT2	0.999996
AT5G09810.1	TAS1C-3'D5[+]	1319	5.5	0.106831	0.369035	no	ACT7	TAS1C-3'D5[+]:ACT7	0.999996
AT5G10070.2	TAS3C-5'D6[+]	531	4	0.184664	0.868045	no	NA	TAS3C-5'D6[+]:AT5G10070.2	0.999996
AT5G10450.4	TAS4-3'D9[+]	519	6	0.315913	0.584871	no	14-3-3lambda	TAS4-3'D9[+]:14-3-3lambda	0.999996
AT5G10940.2	TAS1B-3'D10[+]	2021	6	0.144984	0.787043	no	ASG2	TAS1B-3'D10[+]:ASG2	0.999996
AT5G11580.1	TAS3B-5'D1[+]	1605	5	0.196874	0.852213	no	NA	TAS3B-5'D1[+]:AT5G11580.1	0.999996
AT5G13020.1	TAS3A-5'D1[+]	1359	5	0.141932	0.716541	no	AtEML3	TAS3A-5'D1[+]:AtEML3	0.999996
AT5G13050.2	TAS1B-3'D7[-]	689	6	0.149563	0.892211	no	5-FCL	TAS1B-3'D7[-]:5-FCL	0.999996
AT5G13460.1	TAS3C-5'D3[+]	407	5.5	0.167877	0.95507	no	IQD11	TAS3C-5'D3[+]:IQD11	0.999996
AT5G13700.1	TAS3C-5'D2[+]	855	5.5	0.0930952	0.944608	no	APAO	TAS3C-5'D2[+]:APAO	0.999996
AT5G13850.1	TAS3B-5'D7[+]	572	5.5	0.184664	0.627397	no	NACA3	TAS3B-5'D7[+]:NACA3	0.999996
AT5G14140.1	TAS3C-5'D9[+]	823	6	0.164824	0.984521	no	NA	TAS3C-5'D9[+]:AT5G14140.1	0.999996
AT5G14920.2	TAS2-3'D8[+]	1075	4.5	0.122092	0.750828	no	NA	TAS2-3'D8[+]:AT5G14920.2	0.999996
AT5G15050.1	TAS1B-3'D2[+]	441	6	0.125144	0.972304	no	NA	TAS1B-3'D2[+]:AT5G15050.1	0.999996
AT5G16540.3	TAS3A-5'D3[+]	1521	5	0.988946	0.161969	no	ZFN3	TAS3A-5'D3[+]:ZFN3	0.999996
AT5G17060.1	TAS3C-5'D2[+]	421	5.5	0.167877	0.982034	no	ARFB1B	TAS3C-5'D2[+]:ARFB1B	0.999996
AT5G17450.2	TAS3A-5'D9[-]	51	5.5	0.0961475	0.837852	no	HIPP21	TAS3A-5'D9[-]:HIPP21	0.999996
AT5G17760.2	TAS3B-5'D7[+]	1727	6	0.157194	0.641903	no	NA	TAS3B-5'D7[+]:AT5G17760.2	0.999996
AT5G17900.1	TAS3C-5'D8[-]	838	6	0.132775	0.758751	no	NA	TAS3C-5'D8[-]:AT5G17900.1	0.999996
AT5G18170.1	TAS3B-5'D1[+]	815	6	0.361698	1.10667	no	GDH1	TAS3B-5'D1[+]:GDH1	0.999996
AT5G18460.1	TAS3C-5'D1[+]	1077	6	0.164824	0.737259	no	NA	TAS3C-5'D1[+]:AT5G18460.1	0.999996
AT5G18520.1	TAS4-3'D9[+]	1334	6	0.135827	0.692807	no	Cand7	TAS4-3'D9[+]:Cand7	0.999996
AT5G18525.1	TAS2-3'D6[+]	4767	5.5	0.228923	0.979325	no	NA	TAS2-3'D6[+]:AT5G18525.1	0.999996
AT5G18610.2	TAS4-3'D1[+]	1791	5	0.132775	0.972486	no	NA	TAS4-3'D1[+]:AT5G18610.2	0.999996
AT5G18670.1	TAS3A-5'D4[-]	1191	6	0.227397	0.943678	no	BAM9	TAS3A-5'D4[-]:BAM9	0.999996
AT5G19990.1	TAS3B-5'D6[+]	963	4.5	0.0717291	0.679649	no	ATSUG1	TAS3B-5'D6[+]:ATSUG1	0.999996
AT5G20000.1	TAS4-3'D9[+]	1491	5	0.132775	0.557139	no	NA	TAS4-3'D9[+]:AT5G20000.1	0.999996
AT5G22000.3	TAS1A-3'D7[-]	1391	6	0.401378	0.526745	no	RHF2A	TAS1A-3'D7[-]:RHF2A	0.999996
AT5G22580.1	TAS3C-5'D3[+]	170	6	1.31707	0.772547	no	NA	TAS3C-5'D3[+]:AT5G22580.1	0.999996
AT5G22700.1	TAS1C-3'D6[-]	1502	5.5	0.334227	0.156052	no	NA	TAS1C-3'D6[-]:AT5G22700.1	0.999996
AT5G22950.1	TAS3A-5'D2[+]	720	6	0.100726	0.611615	no	VPS24.1	TAS3A-5'D2[+]:VPS24.1	0.999996
AT5G23210.4	TAS3A-5'D9[+]	469	6	0.294547	1.00474	no	SCPL34	TAS3A-5'D9[+]:SCPL34	0.999996
AT5G24340.1	TAS2-3'D3[-]	1671	6	0.125144	0.337374	no	NA	TAS2-3'D3[-]:AT5G24340.1	0.999996
AT5G24930.1	TAS3C-5'D9[+]	188	6	0.332701	0.0934127	no	ATCOL4	TAS3C-5'D9[+]:ATCOL4	0.999996
AT5G24930.1	TAS3A-5'D6[+]	211	5.5	0.552467	0.108817	no	ATCOL4	TAS3A-5'D6[+]:ATCOL4	0.999996
AT5G25630.2	TAS3B-5'D7[+]	848	6	0.122092	0.932762	no	NA	TAS3B-5'D7[+]:AT5G25630.2	0.999996
AT5G26000.2	TAS3C-5'D2[+]	823	5.5	0.860749	0.820903	no	AtTGG1	TAS3C-5'D2[+]:AtTGG1	0.999996
AT5G26742.3	TAS3B-5'D8[+]	1802	5.5	0.21824	0.612036	no	AtRH3	TAS3B-5'D8[+]:AtRH3	0.999996
AT5G26749.2	TAS3A-5'D3[+]	531	6	0.114461	0.772545	no	NA	TAS3A-5'D3[+]:AT5G26749.2	0.999996
AT5G26780.3	TAS3C-5'D8[-]	1698	6	0.135827	0.632191	no	SHM2	TAS3C-5'D8[-]:SHM2	0.999996
AT5G27440.1	TAS3A-5'D1[+]	304	6	0.167877	0.855744	no	NA	TAS3A-5'D1[+]:AT5G27440.1	0.999996
AT5G27720.1	TAS3C-5'D6[+]	219	4.5	0.128197	0.846549	no	emb1644	TAS3C-5'D6[+]:emb1644	0.999996
AT5G28540.1	TAS1B-3'D4[-]	1747	5	0.175507	0.62762	no	BIP1	TAS1B-3'D4[-]:BIP1	0.999996
AT5G28640.1	TAS2-3'D3[-]	988	5	0.157194	0.733848	no	AN3	TAS2-3'D3[-]:AN3	0.999996
AT5G30495.2	TAS3B-5'D7[+]	589	5.5	0.128197	0.839817	no	NA	TAS3B-5'D7[+]:AT5G30495.2	0.999996
AT5G33370.2	TAS3C-5'D4[-]	1300	3.5	0.772233	0.614335	no	NA	TAS3C-5'D4[-]:AT5G33370.2	0.999996
AT5G35630.3	TAS2-3'D4[+]	1421	6	0.537205	0.0601295	no	ATGSL1	TAS2-3'D4[+]:ATGSL1	0.999996
AT5G35753.1	TAS1B-3'D10[+]	694	4	0.448689	0.864329	no	NA	TAS1B-3'D10[+]:AT5G35753.1	0.999996
AT5G38410.3	TAS3C-5'D8[-]	100	4.5	0.254867	0.108903	no	RBCS3B	TAS3C-5'D8[-]:RBCS3B	0.999996
AT5G38520.2	TAS3C-5'D8[-]	225	6	0.15872	0.85477	no	NA	TAS3C-5'D8[-]:AT5G38520.2	0.999996
AT5G40450.1	TAS3A-5'D6[+]	2042	6	0.149563	0.779559	no	NA	TAS3A-5'D6[+]:AT5G40450.1	0.999996
AT5G42530.1	TAS3C-5'D1[-]	333	5	0.177034	0.415934	no	NA	TAS3C-5'D1[-]:AT5G42530.1	0.999996
AT5G42660.1	TAS1A-3'D8[-]	656	5.5	0.132775	0.849012	no	NA	TAS1A-3'D8[-]:AT5G42660.1	0.999996
AT5G42790.1	TAS3B-5'D9[-]	1084	4.5	0.541784	0.91075	no	ARS5	TAS3B-5'D9[-]:ARS5	0.999996
AT5G43870.1	TAS1C-3'D5[-]	1510	5.5	0.164824	0.804054	no	NA	TAS1C-3'D5[-]:AT5G43870.1	0.999996
AT5G43880.1	TAS3C-5'D2[+]	2471	6	0.204504	0.866117	no	TRM21	TAS3C-5'D2[+]:TRM21	0.999996
AT5G43960.2	TAS4-3'D3[-]	362	4.5	0.187717	0.78275	no	NA	TAS4-3'D3[-]:AT5G43960.2	0.999996
AT5G45920.1	TAS1A-3'D3[-]	855	5	0.17856	0.908261	no	NA	TAS1A-3'D3[-]:AT5G45920.1	0.999996
AT5G46080.1	TAS3A-5'D4[-]	176	6	0.204504	1.03136	no	NA	TAS3A-5'D4[-]:AT5G46080.1	0.999996
AT5G46250.3	TAS2-3'D6[+]	496	6	0.132775	1.02203	no	AtLARP6a	TAS2-3'D6[+]:AtLARP6a	0.999996
AT5G46420.1	TAS2-3'D4[-]	966	5	0.132775	0.883367	no	NA	TAS2-3'D4[-]:AT5G46420.1	0.999996
AT5G46690.1	TAS3A-5'D8[-]	1135	4.5	0.0869906	0.873657	no	bHLH071	TAS3A-5'D8[-]:bHLH071	0.999996
AT5G47100.1	TAS1A-3'D7[+]	891	5.5	0.173981	0.677602	no	ATCBL9	TAS1A-3'D7[+]:ATCBL9	0.999996
AT5G47190.1	TAS1C-3'D7[+]	898	4.5	0.0961475	0.773766	no	NA	TAS1C-3'D7[+]:AT5G47190.1	0.999996
AT5G47420.1	TAS1A-3'D8[-]	828	6	0.172455	0.431054	no	NA	TAS1A-3'D8[-]:AT5G47420.1	0.999996
AT5G47530.1	TAS1B-3'D10[-]	989	6	0.201452	1.0234	no	NA	TAS1B-3'D10[-]:AT5G47530.1	0.999996
AT5G47600.1	TAS3A-5'D8[+]	326	4.5	0.11904	0.827361	no	NA	TAS3A-5'D8[+]:AT5G47600.1	0.999996
AT5G47760.1	TAS1B-3'D2[+]	802	6	0.131249	0.788353	no	ATPGLP2	TAS1B-3'D2[+]:ATPGLP2	0.999996
AT5G47970.2	TAS3C-5'D8[-]	1557	6	0.17856	0.223953	no	NA	TAS3C-5'D8[-]:AT5G47970.2	0.999996
AT5G48180.1	TAS1B-3'D7[-]	657	5.5	0.441058	0.784097	no	AtNSP5	TAS1B-3'D7[-]:AtNSP5	0.999996
AT5G48220.3	TAS3A-5'D5[-]	1637	6	0.141932	0.257372	no	NA	TAS3A-5'D5[-]:AT5G48220.3	0.999996
AT5G49550.1	TAS3C-5'D8[-]	236	5.5	0.160246	0.79921	no	BLOS2	TAS3C-5'D8[-]:BLOS2	0.999996
AT5G49660.1	TAS3C-5'D8[-]	2812	6	0.0976737	0.892092	no	XIP1	TAS3C-5'D8[-]:XIP1	0.999996
AT5G49910.1	TAS3B-5'D7[+]	1853	5.5	0.317439	0.735148	no	cpHsc70-2	TAS3B-5'D7[+]:cpHsc70-2	0.999996
AT5G49930.1	TAS3C-5'D1[+]	1544	5.5	0.117514	0.986528	no	emb1441	TAS3C-5'D1[+]:emb1441	0.999996
AT5G50460.1	TAS1A-3'D8[-]	189	4	0.143458	0.515566	no	NA	TAS1A-3'D8[-]:AT5G50460.1	0.999996
AT5G51260.1	TAS2-3'D6[-]	977	6	0.170929	0.916392	no	NA	TAS2-3'D6[-]:AT5G51260.1	0.999996
AT5G52010.1	TAS3C-5'D9[+]	589	5	0.157194	0.893899	no	NA	TAS3C-5'D9[+]:AT5G52010.1	0.999996
AT5G52040.4	TAS3C-5'D3[+]	1445	6	0.170929	0.315706	no	At-RS41	TAS3C-5'D3[+]:At-RS41	0.999996
AT5G52470.2	TAS1A-3'D9[-]	188	6	0.167877	0.764293	no	ATFBR1	TAS1A-3'D9[-]:ATFBR1	0.999996
AT5G52920.1	TAS4-3'D1[-]	1531	6	0.228923	0.608999	no	PKP-BETA1	TAS4-3'D1[-]:PKP-BETA1	0.999996
AT5G52920.1	TAS3C-5'D4[+]	629	6	0.131249	0.691301	no	PKP-BETA1	TAS3C-5'D4[+]:PKP-BETA1	0.999996
AT5G53330.1	TAS1A-3'D9[-]	649	5	0.135827	0.688959	no	NA	TAS1A-3'D9[-]:AT5G53330.1	0.999996
AT5G55125.2	TAS2-3'D3[+]	253	5.5	0.204504	0.816816	no	NA	TAS2-3'D3[+]:AT5G55125.2	0.999996
AT5G55220.1	TAS1B-3'D4[-]	185	6	0.15872	0.923381	no	NA	TAS1B-3'D4[-]:AT5G55220.1	0.999996
AT5G56300.1	TAS1A-3'D9[-]	586	5.5	0.122092	1.00961	no	GAMT2	TAS1A-3'D9[-]:GAMT2	0.999996
AT5G57150.4	TAS3C-5'D1[+]	134	6	1.33538	0.432608	no	NA	TAS3C-5'D1[+]:AT5G57150.4	0.999996
AT5G57150.4	TAS1A-3'D7[-]	191	3.5	0.172455	0.33647	no	NA	TAS1A-3'D7[-]:AT5G57150.4	0.999996
AT5G57950.1	TAS3C-5'D8[-]	52	6	0.151089	0.332523	no	NA	TAS3C-5'D8[-]:AT5G57950.1	0.999996
AT5G58220.3	TAS3B-5'D10[+]	428	5.5	0.0869906	0.903583	no	ALNS	TAS3B-5'D10[+]:ALNS	0.999996
AT5G58330.3	TAS3C-5'D10[-]	619	6	0.0885168	0.528232	no	NA	TAS3C-5'D10[-]:AT5G58330.3	0.999996
AT5G58610.1	TAS3C-5'D1[+]	2620	5.5	0.157194	0.951082	no	NA	TAS3C-5'D1[+]:AT5G58610.1	0.999996
AT5G58720.3	TAS3B-5'D10[+]	1689	6	0.193821	0.890691	no	NA	TAS3B-5'D10[+]:AT5G58720.3	0.999996
AT5G59950.5	TAS3B-5'D5[+]	1167	4	0.802756	0.212751	no	NA	TAS3B-5'D5[+]:AT5G59950.5	0.999996
AT5G60548.1	TAS4-3'D10[-]	612	6	0.134301	0.534229	no	CPuORF62	TAS4-3'D10[-]:CPuORF62	0.999996
AT5G60550.1	TAS4-3'D10[-]	612	6	0.134301	0.534229	no	ATSNAK1	TAS4-3'D10[-]:ATSNAK1	0.999996
AT5G60670.1	TAS3C-5'D3[+]	305	6	0.207557	0.837079	no	NA	TAS3C-5'D3[+]:AT5G60670.1	0.999996
AT5G60930.1	TAS3C-5'D2[+]	2014	6	0.134301	0.858999	no	NA	TAS3C-5'D2[+]:AT5G60930.1	0.999996
AT5G61480.1	TAS1A-3'D8[-]	3076	5.5	0.141932	0.754853	no	PXY	TAS1A-3'D8[-]:PXY	0.999996
AT5G62030.1	TAS3C-5'D6[-]	1722	5.5	0.148037	0.992087	no	NA	TAS3C-5'D6[-]:AT5G62030.1	0.999996
AT5G62950.3	TAS3C-5'D6[+]	1162	4.5	0.13888	0.866472	no	NA	TAS3C-5'D6[+]:AT5G62950.3	0.999996
AT5G63160.1	TAS3C-5'D8[-]	1027	6	0.207557	0.692104	no	BT1	TAS3C-5'D8[-]:BT1	0.999996
AT5G63810.1	TAS1A-3'D7[-]	2150	6	0.105304	0.744154	no	AtBGAL10	TAS1A-3'D7[-]:AtBGAL10	0.999996
AT5G63870.3	TAS1C-3'D5[-]	947	5.5	0.233501	0.861443	no	ATPP7	TAS1C-3'D5[-]:ATPP7	0.999996
AT5G64170.2	TAS2-3'D8[-]	2126	5.5	0.170929	0.675245	no	NA	TAS2-3'D8[-]:AT5G64170.2	0.999996
AT5G64440.1	TAS3B-5'D4[+]	1020	6	0.114461	0.573981	no	AtFAAH	TAS3B-5'D4[+]:AtFAAH	0.999996
AT5G64940.2	TAS3B-5'D7[+]	550	4.5	0.343384	0.89982	no	ATATH13	TAS3B-5'D7[+]:ATATH13	0.999996
AT5G65220.1	TAS3B-5'D9[+]	450	6	0.352541	0.319569	no	NA	TAS3B-5'D9[+]:AT5G65220.1	0.999996
AT5G65460.1	TAS3B-5'D3[-]	2395	6	0.149563	0.849928	no	KAC2	TAS3B-5'D3[-]:KAC2	0.999996
AT5G65740.4	TAS3C-5'D8[-]	461	6	0.18619	0.879987	no	NA	TAS3C-5'D8[-]:AT5G65740.4	0.999996
AT5G66210.4	TAS3C-5'D5[+]	1846	6	0.154141	0.879104	no	CPK28	TAS3C-5'D5[+]:CPK28	0.999996
AT5G66460.1	TAS3A-5'D5[+]	1252	5.5	0.172455	0.798388	no	AtMAN7	TAS3A-5'D5[+]:AtMAN7	0.999996
AT5G66540.1	TAS3A-5'D1[+]	594	5.5	0.195347	0.736654	no	NA	TAS3A-5'D1[+]:AT5G66540.1	0.999996
AT5G66760.1	TAS4-3'D2[-]	1150	5.5	0.228923	0.860079	no	SDH1-1	TAS4-3'D2[-]:SDH1-1	0.999996
AT5G66760.1	TAS1C-3'D5[-]	1777	6	0.157194	0.396107	no	SDH1-1	TAS1C-3'D5[-]:SDH1-1	0.999996
AT5G67490.1	TAS3C-5'D3[+]	693	5	0.167877	0.69175	no	NA	TAS3C-5'D3[+]:AT5G67490.1	0.999996
AT5G67570.1	TAS1C-3'D8[-]	2068	5.5	0.0961475	0.612708	no	DG1	TAS1C-3'D8[-]:DG1	0.999996

## Sheet: SRX003076
Target transcript	tasiRNA	tasiRNA slice site position in target transcript	Allen score of sRNA:target duplex	Slice site RPM	Slice site RPM + 1/Maximum adjacent site RPM + 1	Previously verified by 5' RACE?	Target gene common name	Interaction name	P-value adjusted for multiple testing
AT2G39730.3	TAS2-3'D8[-]	283	5	1.99131	2.99131	no	RCA	TAS2-3'D8[-]:RCA	0
AT5G18040.1	TAS1A-3'D2[+]	685	2	2.14319	0.588943	yes	NA	TAS1A-3'D2[+]:AT5G18040.1	0.994867
AT5G59000.1	TAS3C-5'D3[+]	739	5.5	2.19382	3.19382	no	NA	TAS3C-5'D3[+]:AT5G59000.1	0.994867
AT1G05060.1	TAS1A-3'D3[-]	863	4	2.59883	0.212143	no	NA	TAS1A-3'D3[-]:AT1G05060.1	0.998291
AT1G06550.1	TAS3C-5'D10[+]	1260	6	1.90693	0.587393	no	NA	TAS3C-5'D10[+]:AT1G06550.1	0.998291
AT1G08190.1	TAS1C-3'D7[+]	3202	4.5	2.05881	0.321802	no	ATVAM2	TAS1C-3'D7[+]:ATVAM2	0.998291
AT1G11390.1	TAS3C-5'D3[+]	2287	5.5	1.62005	1.03328	no	NA	TAS3C-5'D3[+]:AT1G11390.1	0.998291
AT1G11910.1	TAS4-3'D7[-]	1668	5	1.24879	0.081143	no	APA1	TAS4-3'D7[-]:APA1	0.998291
AT1G12090.1	TAS4-3'D7[+]	784	5.5	2.19382	0.484956	no	ELP	TAS4-3'D7[+]:ELP	0.998291
AT1G13790.1	TAS3C-5'D8[-]	2310	3	1.40067	0.563939	no	FDM4	TAS3C-5'D8[-]:FDM4	0.998291
AT1G18740.1	TAS3B-5'D5[+]	1137	4	1.5863	0.980803	no	NA	TAS3B-5'D5[+]:AT1G18740.1	0.998291
AT1G23330.1	TAS3B-5'D7[+]	1408	4	1.26566	0.864739	no	NA	TAS3B-5'D7[+]:AT1G23330.1	0.998291
AT1G24260.3	TAS3B-5'D7[-]	1038	5	2.27819	0.970037	no	AGL9	TAS3B-5'D7[-]:AGL9	0.998291
AT1G47200.1	TAS3B-5'D7[+]	622	5	2.12631	1.08175	no	WPP2	TAS3B-5'D7[+]:WPP2	0.998291
AT1G51550.1	TAS3C-5'D8[-]	1623	6	1.83943	0.831897	no	NA	TAS3C-5'D8[-]:AT1G51550.1	0.998291
AT1G52280.1	TAS3A-5'D10[-]	391	6	1.43442	2.43442	no	AtRABG3d	TAS3A-5'D10[-]:AtRABG3d	0.998291
AT1G55690.3	TAS3C-5'D8[-]	2594	6	1.41754	0.518565	no	NA	TAS3C-5'D8[-]:AT1G55690.3	0.998291
AT1G57700.1	TAS3C-5'D6[-]	2576	6	1.63692	0.843461	no	NA	TAS3C-5'D6[-]:AT1G57700.1	0.998291
AT1G59960.1	TAS3C-5'D3[+]	902	5.5	1.43442	1.00698	no	NA	TAS3C-5'D3[+]:AT1G59960.1	0.998291
AT1G65440.3	TAS1B-3'D4[-]	4568	5.5	1.01253	0.554022	no	GTB1	TAS1B-3'D4[-]:GTB1	0.998291
AT1G75940.1	TAS2-3'D3[+]	1613	6	5.80517	0.378199	no	ATA27	TAS2-3'D3[+]:ATA27	0.998291
AT1G76400.1	TAS1A-3'D3[-]	1879	5	1.80568	0.423848	no	NA	TAS1A-3'D3[-]:AT1G76400.1	0.998291
AT1G79030.1	TAS3C-5'D8[-]	1698	6	3.64511	1.68603	no	NA	TAS3C-5'D8[-]:AT1G79030.1	0.998291
AT1G80000.2	TAS1B-3'D10[-]	2378	6	1.43442	0.709729	no	NA	TAS1B-3'D10[-]:AT1G80000.2	0.998291
AT1G80850.1	TAS3C-5'D8[-]	1247	6	1.14753	0.398604	no	NA	TAS3C-5'D8[-]:AT1G80850.1	0.998291
AT2G05185.2	TAS3B-5'D5[-]	63	5	1.06316	1.11899	no	NA	TAS3B-5'D5[-]:AT2G05185.2	0.998291
AT2G05920.1	TAS3C-5'D3[+]	2460	3	2.36257	0.302705	no	NA	TAS3C-5'D3[+]:AT2G05920.1	0.998291
AT2G18050.2	TAS3C-5'D3[+]	502	6	1.87318	0.904386	no	HIS1-3	TAS3C-5'D3[+]:HIS1-3	0.998291
AT2G19110.1	TAS3B-5'D4[+]	3747	6	2.85196	0.327364	no	ATHMA4	TAS3B-5'D4[+]:ATHMA4	0.998291
AT2G20580.1	TAS3B-5'D7[+]	2900	5.5	1.95756	0.902193	no	ATRPN1A	TAS3B-5'D7[+]:ATRPN1A	0.998291
AT2G21600.1	TAS3C-5'D8[-]	859	6	1.75505	0.299963	no	ATRER1B	TAS3C-5'D8[-]:ATRER1B	0.998291
AT2G21660.2	TAS4-3'D2[-]	542	5.5	8.72463	0.0384627	no	ATGRP7	TAS4-3'D2[-]:ATGRP7	0.998291
AT2G25590.1	TAS1B-3'D4[+]	1162	5	1.82255	0.26793	no	NA	TAS1B-3'D4[+]:AT2G25590.1	0.998291
AT2G31360.1	TAS3B-5'D9[+]	1005	6	1.83943	0.656596	no	ADS2	TAS3B-5'D9[+]:ADS2	0.998291
AT2G36160.1	TAS1B-3'D4[-]	536	5.5	3.12197	0.35132	no	NA	TAS1B-3'D4[-]:AT2G36160.1	0.998291
AT2G39770.2	TAS4-3'D10[-]	1243	6	2.86884	0.182638	no	CYT1	TAS4-3'D10[-]:CYT1	0.998291
AT2G40205.1	TAS3B-5'D9[-]	105	4	7.62773	0.158911	no	NA	TAS3B-5'D9[-]:AT2G40205.1	0.998291
AT2G41290.1	TAS3C-5'D10[+]	1046	4.5	1.80568	0.672407	no	SSL2	TAS3C-5'D10[+]:SSL2	0.998291
AT2G44490.1	TAS3C-5'D4[-]	1837	6	3.61136	0.356613	no	BGLU26	TAS3C-5'D4[-]:BGLU26	0.998291
AT3G03540.1	TAS3C-5'D2[+]	1271	5.5	1.60317	0.675804	no	NPC5	TAS3C-5'D2[+]:NPC5	0.998291
AT3G04920.1	TAS3A-5'D8[+]	255	5	1.82255	0.637759	no	NA	TAS3A-5'D8[+]:AT3G04920.1	0.998291
AT3G05060.1	TAS3C-5'D3[+]	1690	6	1.33316	0.251259	no	NA	TAS3C-5'D3[+]:AT3G05060.1	0.998291
AT3G06483.1	TAS3A-5'D5[-]	1397	6	1.90693	0.919897	no	ATPDHK	TAS3A-5'D5[-]:ATPDHK	0.998291
AT3G09035.1	TAS3C-5'D8[-]	1256	6	1.48504	0.366989	no	NA	TAS3C-5'D8[-]:AT3G09035.1	0.998291
AT3G09860.1	TAS3A-5'D4[-]	455	4	16.2342	0.680266	no	NA	TAS3A-5'D4[-]:AT3G09860.1	0.998291
AT3G11510.1	TAS4-3'D9[+]	685	5.5	5.26516	0.35383	no	NA	TAS4-3'D9[+]:AT3G11510.1	0.998291
AT3G11910.2	TAS2-3'D3[+]	3297	6	1.90693	1.27355	no	AtUBP13	TAS2-3'D3[+]:AtUBP13	0.998291
AT3G11980.1	TAS3B-5'D7[+]	1817	5.5	2.10944	0.659813	no	FAR2	TAS3B-5'D7[+]:FAR2	0.998291
AT3G17930.1	TAS3A-5'D5[+]	684	4	2.12631	0.505812	no	DAC	TAS3A-5'D5[+]:DAC	0.998291
AT3G22320.1	TAS3B-5'D2[+]	823	5.5	1.73818	0.267198	no	ATRPABC24.3	TAS3B-5'D2[+]:ATRPABC24.3	0.998291
AT3G44890.1	TAS3C-5'D3[+]	718	6	3.35822	0.291074	no	RPL9	TAS3C-5'D3[+]:RPL9	0.998291
AT3G47340.3	TAS3C-5'D9[-]	2225	3.5	3.29072	0.428578	no	ASN1	TAS3C-5'D9[-]:ASN1	0.998291
AT3G54170.1	TAS3B-5'D7[+]	1027	6	5.04577	1.0718	no	ATFIP37	TAS3B-5'D7[+]:ATFIP37	0.998291
AT3G58030.4	TAS3C-5'D3[+]	1884	6	3.69573	0.73954	no	NA	TAS3C-5'D3[+]:AT3G58030.4	0.998291
AT4G04640.1	TAS4-3'D9[-]	1325	6	1.99131	0.118547	no	ATPC1	TAS4-3'D9[-]:ATPC1	0.998291
AT4G11260.1	TAS3B-5'D9[-]	1239	6	1.97443	0.363224	no	ATSGT1B	TAS3B-5'D9[-]:ATSGT1B	0.998291
AT4G14570.1	TAS3B-5'D7[+]	2280	5.5	1.56942	0.796085	no	AARE	TAS3B-5'D7[+]:AARE	0.998291
AT4G18593.1	TAS1B-3'D4[-]	340	5.5	1.80568	0.838595	no	NA	TAS1B-3'D4[-]:AT4G18593.1	0.998291
AT4G19490.2	TAS1C-3'D1[+]	3411	5	1.63692	1.02627	no	ATVPS54	TAS1C-3'D1[+]:ATVPS54	0.998291
AT4G22220.1	TAS3C-5'D3[+]	643	5.5	8.269	0.599458	no	ATISU1	TAS3C-5'D3[+]:ATISU1	0.998291
AT4G27900.2	TAS3C-5'D2[+]	877	6	2.76758	0.684298	no	NA	TAS3C-5'D2[+]:AT4G27900.2	0.998291
AT4G33060.1	TAS3C-5'D4[+]	1705	6	2.32882	0.574664	no	NA	TAS3C-5'D4[+]:AT4G33060.1	0.998291
AT4G33150.3	TAS3C-5'D3[+]	1710	6	1.70443	0.256717	no	LKR	TAS3C-5'D3[+]:LKR	0.998291
AT4G34960.1	TAS2-3'D8[-]	876	6	1.41754	0.803655	no	NA	TAS2-3'D8[-]:AT4G34960.1	0.998291
AT4G36020.1	TAS3A-5'D9[+]	887	5.5	1.19816	0.984878	no	CSDP1	TAS3A-5'D9[+]:CSDP1	0.998291
AT4G36730.2	TAS2-3'D1[-]	1135	5	3.10509	1.06571	no	AtGBF1	TAS2-3'D1[-]:AtGBF1	0.998291
AT4G37180.2	TAS3B-5'D9[+]	357	6	2.58195	1.56928	no	NA	TAS3B-5'D9[+]:AT4G37180.2	0.998291
AT4G38630.1	TAS3B-5'D7[+]	1203	6	1.5863	0.575599	no	ATMCB1	TAS3B-5'D7[+]:ATMCB1	0.998291
AT4G40030.3	TAS3C-5'D9[-]	826	5	1.92381	0.033634	no	NA	TAS3C-5'D9[-]:AT4G40030.3	0.998291
AT5G10480.3	TAS3C-5'D3[+]	795	5	1.33316	0.48638	no	PAS2	TAS3C-5'D3[+]:PAS2	0.998291
AT5G10860.1	TAS3C-5'D7[-]	800	5.5	3.96574	0.492681	no	CBSX3	TAS3C-5'D7[-]:CBSX3	0.998291
AT5G14920.2	TAS2-3'D8[+]	1075	4.5	1.75505	0.378561	no	NA	TAS2-3'D8[+]:AT5G14920.2	0.998291
AT5G22120.1	TAS1B-3'D10[-]	1351	5.5	3.3751	0.530985	no	NA	TAS1B-3'D10[-]:AT5G22120.1	0.998291
AT5G22608.3	TAS3B-5'D5[-]	61	5	1.06316	1.11899	no	NA	TAS3B-5'D5[-]:AT5G22608.3	0.998291
AT5G22700.1	TAS1C-3'D6[-]	1502	5.5	2.46382	0.340813	no	NA	TAS1C-3'D6[-]:AT5G22700.1	0.998291
AT5G25560.4	TAS3A-5'D4[-]	2523	5	1.89006	0.224671	no	NA	TAS3A-5'D4[-]:AT5G25560.4	0.998291
AT5G28640.1	TAS2-3'D3[-]	988	5	3.12197	0.111878	no	AN3	TAS2-3'D3[-]:AN3	0.998291
AT5G28770.3	TAS3C-5'D3[-]	1134	5	1.23191	0.0562497	no	AtbZIP63	TAS3C-5'D3[-]:AtbZIP63	0.998291
AT5G33370.2	TAS3C-5'D4[-]	1300	3.5	7.5771	1.00395	no	NA	TAS3C-5'D4[-]:AT5G33370.2	0.998291
AT5G35630.3	TAS2-3'D4[+]	1421	6	3.18947	0.182374	no	ATGSL1	TAS2-3'D4[+]:ATGSL1	0.998291
AT5G37130.1	TAS1A-3'D9[-]	2607	5.5	1.68755	0.660114	no	NA	TAS1A-3'D9[-]:AT5G37130.1	0.998291
AT5G42950.1	TAS3B-5'D9[+]	5046	6	1.09691	0.75648	no	NA	TAS3B-5'D9[+]:AT5G42950.1	0.998291
AT5G43870.1	TAS1C-3'D5[-]	1510	5.5	2.14319	0.75026	no	NA	TAS1C-3'D5[-]:AT5G43870.1	0.998291
AT5G43900.3	TAS1B-3'D8[-]	4966	6	1.13066	0.60049	no	ATMYA2	TAS1B-3'D8[-]:ATMYA2	0.998291
AT5G47020.1	TAS3B-5'D9[+]	4698	5.5	1.11378	0.23622	no	NA	TAS3B-5'D9[+]:AT5G47020.1	0.998291
AT5G47190.1	TAS1C-3'D7[+]	898	4.5	4.30325	0.486273	no	NA	TAS1C-3'D7[+]:AT5G47190.1	0.998291
AT5G47730.3	TAS1B-3'D8[+]	1154	5.5	0.978779	0.219478	no	NA	TAS1B-3'D8[+]:AT5G47730.3	0.998291
AT5G57370.1	TAS3C-5'D7[+]	890	6	5.65329	1.66173	no	NA	TAS3C-5'D7[+]:AT5G57370.1	0.998291
AT5G58590.1	TAS3C-5'D3[+]	711	6	1.11378	0.850602	no	RANBP1	TAS3C-5'D3[+]:RANBP1	0.998291
AT5G61530.3	TAS4-3'D5[+]	1370	5	3.57761	0.667699	no	NA	TAS4-3'D5[+]:AT5G61530.3	0.998291
AT5G62000.4	TAS1B-3'D10[+]	3081	5	1.75505	0.170014	no	ARF1-BP	TAS1B-3'D10[+]:ARF1-BP	0.998291
AT5G65220.1	TAS3B-5'D9[+]	450	6	1.21504	0.408575	no	NA	TAS3B-5'D9[+]:AT5G65220.1	0.998291
AT5G66050.2	TAS1C-3'D8[-]	1593	4.5	1.18129	0.178963	no	NA	TAS1C-3'D8[-]:AT5G66050.2	0.998291

## Sheet: SRX003078
Target transcript	tasiRNA	tasiRNA slice site position in target transcript	Allen score of sRNA:target duplex	Slice site RPM	Slice site RPM + 1/Maximum adjacent site RPM + 1	Previously verified by 5' RACE?	Target gene common name	Interaction name	P-value adjusted for multiple testing
AT4G29770.2	TAS1A-3'D6[+]	780	3	0.95985	1.95985	yes	NA	TAS1A-3'D6[+]:AT4G29770.2	0
AT5G18040.1	TAS1A-3'D2[+]	685	2	1.86993	1.51379	yes	NA	TAS1A-3'D2[+]:AT5G18040.1	0
AT4G32160.1	TAS3C-5'D9[-]	2477	5	1.26558	2.26558	no	NA	TAS3C-5'D9[-]:AT4G32160.1	0.543387
AT4G21180.1	TAS3C-5'D8[-]	2132	2.5	0.65412	0.393885	no	ATERDJ2B	TAS3C-5'D8[-]:ATERDJ2B	0.683351
AT4G26950.2	TAS3C-5'D8[-]	427	5	0.73233	1.73233	no	NA	TAS3C-5'D8[-]:AT4G26950.2	0.683351
AT5G33370.2	TAS3C-5'D4[-]	1300	3.5	8.21205	1.35154	no	NA	TAS3C-5'D4[-]:AT5G33370.2	0.683351
AT5G52070.1	TAS1B-3'D5[+]	755	4.5	1.75617	1.63808	no	NA	TAS1B-3'D5[+]:AT5G52070.1	0.683351
AT5G38690.1	TAS4-3'D7[+]	2082	5	2.48139	1.56613	no	NA	TAS4-3'D7[+]:AT5G38690.1	0.739431
AT5G57040.1	TAS2-3'D2[-]	760	2	0.66834	0.313428	no	NA	TAS2-3'D2[-]:AT5G57040.1	0.739431
AT3G17930.1	TAS3A-5'D5[+]	684	4	3.555	1.10524	no	DAC	TAS3A-5'D5[+]:DAC	0.884565
AT4G35040.1	TAS3C-5'D2[-]	1304	4	0.68967	1.68967	no	bZIP19	TAS3C-5'D2[-]:bZIP19	0.954194
AT5G46170.1	TAS3B-5'D7[-]	1582	2.5	0.61146	0.869555	no	NA	TAS3B-5'D7[-]:AT5G46170.1	0.954194
AT1G01820.1	TAS1A-3'D2[-]	823	6	1.32957	0.677451	no	PEX11C	TAS1A-3'D2[-]:PEX11C	0.993487
AT1G02640.1	TAS3C-5'D4[+]	2488	4.5	2.11878	0.829754	no	ATBXL2	TAS3C-5'D4[+]:ATBXL2	0.993487
AT1G04770.1	TAS3A-5'D8[+]	931	5.5	0.81765	0.417283	no	NA	TAS3A-5'D8[+]:AT1G04770.1	0.993487
AT1G05060.1	TAS1A-3'D3[-]	863	4	1.24425	0.265551	no	NA	TAS1A-3'D3[-]:AT1G05060.1	0.993487
AT1G05670.2	TAS3A-5'D8[+]	2153	5.5	0.66123	1.66123	no	NA	TAS3A-5'D8[+]:AT1G05670.2	0.993487
AT1G10510.1	TAS1C-3'D9[+]	1923	4	0.73944	0.336679	no	emb2004	TAS1C-3'D9[+]:emb2004	0.993487
AT1G10730.1	TAS2-3'D3[+]	1185	6	0.33417	0.736891	no	NA	TAS2-3'D3[+]:AT1G10730.1	0.993487
AT1G10865.2	TAS2-3'D4[+]	505	4.5	0.79632	0.992146	no	NA	TAS2-3'D4[+]:AT1G10865.2	0.993487
AT1G11910.1	TAS4-3'D7[-]	1668	5	0.90297	0.15528	no	APA1	TAS4-3'D7[-]:APA1	0.993487
AT1G12360.1	TAS3C-5'D3[-]	2337	4.5	0.6399	0.0794883	no	KEU	TAS3C-5'D3[-]:KEU	0.993487
AT1G14710.2	TAS3C-5'D8[-]	2242	6	0.57591	0.604524	no	NA	TAS3C-5'D8[-]:AT1G14710.2	0.993487
AT1G18540.1	TAS4-3'D8[+]	728	4.5	4.93434	0.132681	no	NA	TAS4-3'D8[+]:AT1G18540.1	0.993487
AT1G20816.1	TAS3C-5'D8[-]	572	4.5	0.73233	0.385123	no	NA	TAS3C-5'D8[-]:AT1G20816.1	0.993487
AT1G23000.1	TAS3A-5'D3[-]	1311	5	0.66834	0.857481	no	NA	TAS3A-5'D3[-]:AT1G23000.1	0.993487
AT1G23420.1	TAS3A-5'D4[+]	842	5.5	0.69678	0.671022	no	INO	TAS3A-5'D4[+]:INO	0.993487
AT1G28490.2	TAS4-3'D9[+]	723	4.5	0.75366	0.757406	no	ATSYP61	TAS4-3'D9[+]:ATSYP61	0.993487
AT1G30360.1	TAS2-3'D3[+]	2344	5.5	0.71811	0.726437	no	ERD4	TAS2-3'D3[+]:ERD4	0.993487
AT1G31330.1	TAS3C-5'D1[+]	358	5	0.67545	0.585245	no	PSAF	TAS3C-5'D1[+]:PSAF	0.993487
AT1G32070.3	TAS2-3'D3[-]	889	4	0.59724	0.125526	no	ATNSI	TAS2-3'D3[-]:ATNSI	0.993487
AT1G32700.2	TAS3A-5'D4[+]	1209	5	1.53576	0.444893	no	NA	TAS3A-5'D4[+]:AT1G32700.2	0.993487
AT1G42540.1	TAS3C-5'D9[+]	3013	5.5	0.65412	0.358113	no	ATGLR3.3	TAS3C-5'D9[+]:ATGLR3.3	0.993487
AT1G43710.1	TAS3C-5'D1[-]	1563	5.5	1.46466	0.350273	no	ATSDC1	TAS3C-5'D1[-]:ATSDC1	0.993487
AT1G47340.1	TAS3C-5'D3[+]	1365	5.5	0.02844	0.494271	no	NA	TAS3C-5'D3[+]:AT1G47340.1	0.993487
AT1G47380.1	TAS3C-5'D3[+]	1959	5	0.711	0.730014	no	NA	TAS3C-5'D3[+]:AT1G47380.1	0.993487
AT1G48350.1	TAS2-3'D1[-]	336	4	0.68256	0.599642	no	EMB3105	TAS2-3'D1[-]:EMB3105	0.993487
AT1G48860.2	TAS1C-3'D7[-]	1764	5.5	0.56169	0.28613	no	NA	TAS1C-3'D7[-]:AT1G48860.2	0.993487
AT1G48920.1	TAS4-3'D9[+]	1286	6	0.65412	0.68699	no	ATNUC-L1	TAS4-3'D9[+]:ATNUC-L1	0.993487
AT1G52670.1	TAS2-3'D3[-]	1010	4.5	1.48599	0.988689	no	NA	TAS2-3'D3[-]:AT1G52670.1	0.993487
AT1G55690.3	TAS3C-5'D8[-]	2594	6	2.41029	0.576051	no	NA	TAS3C-5'D8[-]:AT1G55690.3	0.993487
AT1G56280.2	TAS3B-5'D7[+]	853	5.5	0.59724	0.498499	no	ATDI19	TAS3B-5'D7[+]:ATDI19	0.993487
AT1G59910.1	TAS2-3'D3[+]	2758	5.5	0.77499	1.04609	no	NA	TAS2-3'D3[+]:AT1G59910.1	0.993487
AT1G60260.1	TAS3C-5'D2[+]	1176	6	0.84609	1.02771	no	BGLU5	TAS3C-5'D2[+]:BGLU5	0.993487
AT1G60620.1	TAS1C-3'D5[-]	1229	6	1.422	0.960524	no	ATRPAC43	TAS1C-3'D5[-]:ATRPAC43	0.993487
AT1G61730.1	TAS3B-5'D7[-]	1334	5	0.68256	0.481335	no	NA	TAS3B-5'D7[-]:AT1G61730.1	0.993487
AT1G65370.1	TAS3A-5'D9[-]	317	5	0.63279	0.411077	no	NA	TAS3A-5'D9[-]:AT1G65370.1	0.993487
AT1G65960.2	TAS3B-5'D6[+]	1452	6	2.95065	0.848773	no	GAD2	TAS3B-5'D6[+]:GAD2	0.993487
AT1G71030.1	TAS1C-3'D1[+]	737	4	0.78921	0.37523	no	ATMYBL2	TAS1C-3'D1[+]:ATMYBL2	0.993487
AT1G72260.1	TAS2-3'D3[+]	140	6	0.57591	0.837519	no	THI2.1	TAS2-3'D3[+]:THI2.1	0.993487
AT1G73480.1	TAS3C-5'D3[+]	1878	5	0.76788	0.356408	no	NA	TAS3C-5'D3[+]:AT1G73480.1	0.993487
AT1G74470.1	TAS3B-5'D7[+]	560	5	0.60435	1.60435	no	NA	TAS3B-5'D7[+]:AT1G74470.1	0.993487
AT1G77420.1	TAS3B-5'D5[-]	1340	6	0.63279	0.432768	no	NA	TAS3B-5'D5[-]:AT1G77420.1	0.993487
AT1G78660.3	TAS4-3'D6[-]	1094	5	0.02133	0.399411	no	ATGGH1	TAS4-3'D6[-]:ATGGH1	0.993487
AT1G78680.2	TAS4-3'D6[-]	1133	5	0.66834	0.194623	no	ATGGH2	TAS4-3'D6[-]:ATGGH2	0.993487
AT1G79000.2	TAS3C-5'D3[+]	5723	4	0.66123	0.52784	no	ATHAC1	TAS3C-5'D3[+]:ATHAC1	0.993487
AT1G80000.2	TAS1B-3'D10[-]	2378	6	0.65412	0.682956	no	NA	TAS1B-3'D10[-]:AT1G80000.2	0.993487
AT2G01690.2	TAS3B-5'D5[-]	2729	6	0.67545	0.534775	no	NA	TAS3B-5'D5[-]:AT2G01690.2	0.993487
AT2G18630.1	TAS4-3'D6[+]	1579	6	0.64701	0.572467	no	NA	TAS4-3'D6[+]:AT2G18630.1	0.993487
AT2G19760.1	TAS2-3'D3[-]	645	4	0.711	0.541209	no	PFN1	TAS2-3'D3[-]:PFN1	0.993487
AT2G21600.1	TAS3C-5'D8[-]	859	6	2.92932	0.880506	no	ATRER1B	TAS3C-5'D8[-]:ATRER1B	0.993487
AT2G21660.2	TAS4-3'D2[-]	542	5.5	4.87035	0.03667	no	ATGRP7	TAS4-3'D2[-]:ATGRP7	0.993487
AT2G21880.2	TAS3B-5'D6[-]	769	6	0.72522	0.991825	no	ATRAB7A	TAS3B-5'D6[-]:ATRAB7A	0.993487
AT2G25210.1	TAS3C-5'D4[-]	298	4	0.72522	0.0727873	no	NA	TAS3C-5'D4[-]:AT2G25210.1	0.993487
AT2G25590.1	TAS1B-3'D4[+]	1162	5	0.56169	0.16992	no	NA	TAS1B-3'D4[+]:AT2G25590.1	0.993487
AT2G25840.3	TAS3B-5'D7[+]	1261	4	1.31535	0.619517	no	OVA4	TAS3B-5'D7[+]:OVA4	0.993487
AT2G29140.1	TAS3C-5'D8[-]	3202	6	0.59724	0.823948	no	APUM3	TAS3C-5'D8[-]:APUM3	0.993487
AT2G29940.1	TAS3C-5'D3[+]	4280	5	0.69678	0.549059	no	ABCG31	TAS3C-5'D3[+]:ABCG31	0.993487
AT2G30500.2	TAS1C-3'D5[-]	1354	6	0.59013	0.841895	no	NET4B	TAS1C-3'D5[-]:NET4B	0.993487
AT2G31360.1	TAS3B-5'D9[+]	1005	6	2.28942	0.58515	no	ADS2	TAS3B-5'D9[+]:ADS2	0.993487
AT2G33150.1	TAS3B-5'D7[-]	1589	5	0.72522	0.539639	no	KAT2	TAS3B-5'D7[-]:KAT2	0.993487
AT2G35240.1	TAS1A-3'D9[+]	800	5.5	2.80845	1.03678	no	MORF6	TAS1A-3'D9[+]:MORF6	0.993487
AT2G35630.1	TAS2-3'D7[+]	6075	5	0.71811	0.544683	no	GEM1	TAS2-3'D7[+]:GEM1	0.993487
AT2G36160.1	TAS1B-3'D4[-]	536	5.5	3.61899	0.465481	no	NA	TAS1B-3'D4[-]:AT2G36160.1	0.993487
AT2G36990.1	TAS2-3'D7[-]	1967	5.5	1.65663	1.45588	no	ATSIG6	TAS2-3'D7[-]:ATSIG6	0.993487
AT2G40205.1	TAS3B-5'D9[-]	105	4	7.52949	0.226877	no	NA	TAS3B-5'D9[-]:AT2G40205.1	0.993487
AT2G40650.1	TAS3C-5'D3[+]	1134	4	0.81765	0.920763	no	NA	TAS3C-5'D3[+]:AT2G40650.1	0.993487
AT2G41220.1	TAS3B-5'D1[+]	5018	5.5	0.55458	0.890086	no	GLU2	TAS3B-5'D1[+]:GLU2	0.993487
AT2G46820.2	TAS3B-5'D9[-]	803	4.5	0.52614	0.267424	no	PSAP	TAS3B-5'D9[-]:PSAP	0.993487
AT3G04400.2	TAS3C-5'D8[+]	574	5.5	4.23045	0.408319	no	emb2171	TAS3C-5'D8[+]:emb2171	0.993487
AT3G04920.1	TAS3A-5'D8[+]	255	5	0.52614	0.596827	no	NA	TAS3A-5'D8[+]:AT3G04920.1	0.993487
AT3G05060.1	TAS3C-5'D3[+]	1690	6	4.266	0.761476	no	NA	TAS3C-5'D3[+]:AT3G05060.1	0.993487
AT3G09860.1	TAS3A-5'D4[-]	455	4	5.9013	0.233798	no	NA	TAS3A-5'D4[-]:AT3G09860.1	0.993487
AT3G11510.1	TAS4-3'D9[+]	685	5.5	4.28022	0.296035	no	NA	TAS4-3'D9[+]:AT3G11510.1	0.993487
AT3G11950.2	TAS1A-3'D7[-]	1575	6	0.76788	1.0419	no	NA	TAS1A-3'D7[-]:AT3G11950.2	0.993487
AT3G13060.2	TAS3C-5'D3[+]	2200	5	0.76788	0.957635	no	ECT5	TAS3C-5'D3[+]:ECT5	0.993487
AT3G14230.3	TAS3C-5'D2[-]	1483	5	0.58302	0.452859	no	RAP2.2	TAS3C-5'D2[-]:RAP2.2	0.993487
AT3G17185.2	TAS3C-5'D10[-]	618	6	0.60435	0.495223	no	TAS3a	TAS3C-5'D10[-]:TAS3a	0.993487
AT3G17820.1	TAS3C-5'D2[-]	1272	6	0.68256	0.800438	no	ATGSKB6	TAS3C-5'D2[-]:ATGSKB6	0.993487
AT3G22880.1	TAS3A-5'D2[+]	1108	5	0.61146	0.736711	no	ARLIM15	TAS3A-5'D2[+]:ARLIM15	0.993487
AT3G24100.1	TAS3C-5'D2[+]	156	6	0.78921	1.04571	no	NA	TAS3C-5'D2[+]:AT3G24100.1	0.993487
AT3G25290.2	TAS4-3'D7[+]	1246	4	0.68967	0.681626	no	NA	TAS4-3'D7[+]:AT3G25290.2	0.993487
AT3G26935.1	TAS3C-5'D1[-]	1873	5	0.65412	0.394553	no	NA	TAS3C-5'D1[-]:AT3G26935.1	0.993487
AT3G29200.1	TAS4-3'D9[+]	1325	5.5	0.80343	0.580897	no	ATCM1	TAS4-3'D9[+]:ATCM1	0.993487
AT3G47340.3	TAS3C-5'D9[-]	2225	3.5	0.71811	0.265649	no	ASN1	TAS3C-5'D9[-]:ASN1	0.993487
AT3G49910.1	TAS1C-3'D6[+]	581	5	2.6307	0.159396	no	NA	TAS1C-3'D6[+]:AT3G49910.1	0.993487
AT3G50890.1	TAS3B-5'D7[+]	692	4.5	2.28231	1.18783	no	AtHB28	TAS3B-5'D7[+]:AtHB28	0.993487
AT3G51550.1	TAS2-3'D3[-]	2979	6	0.80343	0.776517	no	FER	TAS2-3'D3[-]:FER	0.993487
AT3G51980.1	TAS1B-3'D8[+]	1417	5.5	1.30113	1.30689	no	NA	TAS1B-3'D8[+]:AT3G51980.1	0.993487
AT3G52200.2	TAS3B-5'D5[+]	2113	5	0.44793	0.462154	no	LTA3	TAS3B-5'D5[+]:LTA3	0.993487
AT3G54170.1	TAS3B-5'D7[+]	1027	6	2.06901	0.899926	no	ATFIP37	TAS3B-5'D7[+]:ATFIP37	0.993487
AT3G57290.1	TAS3C-5'D3[-]	1503	5	0.87453	0.2987	no	ATEIF3E-1	TAS3C-5'D3[-]:ATEIF3E-1	0.993487
AT3G57330.1	TAS3C-5'D3[+]	2807	6	2.18988	1.43042	no	ACA11	TAS3C-5'D3[+]:ACA11	0.993487
AT3G58650.1	TAS3A-5'D1[+]	2946	6	0.711	0.811223	no	TRM7	TAS3A-5'D1[+]:TRM7	0.993487
AT3G60750.2	TAS3B-5'D7[+]	2144	5.5	0.6399	0.923893	no	NA	TAS3B-5'D7[+]:AT3G60750.2	0.993487
AT4G02200.3	TAS3B-5'D7[+]	693	4.5	0.65412	0.45919	no	NA	TAS3B-5'D7[+]:AT4G02200.3	0.993487
AT4G02660.1	TAS3C-5'D1[+]	11334	6	0.79632	1.0327	no	NA	TAS3C-5'D1[+]:AT4G02660.1	0.993487
AT4G11260.1	TAS3B-5'D9[-]	1239	6	2.38896	0.394364	no	ATSGT1B	TAS3B-5'D9[-]:ATSGT1B	0.993487
AT4G21326.1	TAS3B-5'D2[+]	2876	5.5	0.6399	0.884902	no	ATSBT3.12	TAS3B-5'D2[+]:ATSBT3.12	0.993487
AT4G22220.1	TAS3C-5'D3[+]	643	5.5	3.59055	0.366087	no	ATISU1	TAS3C-5'D3[+]:ATISU1	0.993487
AT4G25010.1	TAS3C-5'D3[-]	1115	5	1.00251	0.279787	no	AtSWEET14	TAS3C-5'D3[-]:AtSWEET14	0.993487
AT4G25080.5	TAS1A-3'D9[-]	1012	5	0.67545	0.810767	no	CHLM	TAS1A-3'D9[-]:CHLM	0.993487
AT4G28750.1	TAS3A-5'D7[+]	329	6	0.6399	0.667291	no	PSAE-1	TAS3A-5'D7[+]:PSAE-1	0.993487
AT4G33060.1	TAS3C-5'D4[+]	1705	6	1.15893	1.10158	no	NA	TAS3C-5'D4[+]:AT4G33060.1	0.993487
AT4G33960.1	TAS3C-5'D9[-]	289	5.5	0.70389	0.199432	no	NA	TAS3C-5'D9[-]:AT4G33960.1	0.993487
AT4G34400.1	TAS3A-5'D9[-]	1402	5	0.711	0.462208	no	NA	TAS3A-5'D9[-]:AT4G34400.1	0.993487
AT4G34620.1	TAS1C-3'D7[-]	524	5.5	1.40067	0.331466	no	SSR16	TAS1C-3'D7[-]:SSR16	0.993487
AT4G36648.1	TAS1A-3'D2[-]	1908	6	0.76788	0.674485	no	NA	TAS1A-3'D2[-]:AT4G36648.1	0.993487
AT4G40030.3	TAS3C-5'D9[-]	826	5	4.08114	0.175733	no	NA	TAS3C-5'D9[-]:AT4G40030.3	0.993487
AT5G02120.1	TAS2-3'D5[+]	339	6	2.44584	0.64478	no	OHP	TAS2-3'D5[+]:OHP	0.993487
AT5G03330.2	TAS1A-3'D9[-]	1135	6	0.68256	0.890833	no	NA	TAS1A-3'D9[-]:AT5G03330.2	0.993487
AT5G10860.1	TAS3C-5'D7[-]	800	5.5	0.68967	0.158047	no	CBSX3	TAS3C-5'D7[-]:CBSX3	0.993487
AT5G14920.2	TAS2-3'D8[+]	1075	4.5	3.77541	0.65806	no	NA	TAS2-3'D8[+]:AT5G14920.2	0.993487
AT5G22000.3	TAS1A-3'D7[-]	1391	6	0.59013	0.660413	no	RHF2A	TAS1A-3'D7[-]:RHF2A	0.993487
AT5G22120.1	TAS1B-3'D10[-]	1351	5.5	0.76788	0.49077	no	NA	TAS1B-3'D10[-]:AT5G22120.1	0.993487
AT5G22700.1	TAS1C-3'D6[-]	1502	5.5	2.88666	0.200778	no	NA	TAS1C-3'D6[-]:AT5G22700.1	0.993487
AT5G23280.1	TAS2-3'D7[-]	895	6	0.76077	0.849133	no	NA	TAS2-3'D7[-]:AT5G23280.1	0.993487
AT5G23450.3	TAS3C-5'D8[+]	2872	5	1.02384	0.381234	no	ATLCBK1	TAS3C-5'D8[+]:ATLCBK1	0.993487
AT5G23480.1	TAS3B-5'D7[+]	1664	5.5	0.67545	0.995774	no	NA	TAS3B-5'D7[+]:AT5G23480.1	0.993487
AT5G25560.4	TAS3A-5'D4[-]	2523	5	0.86742	0.369589	no	NA	TAS3A-5'D4[-]:AT5G25560.4	0.993487
AT5G26800.1	TAS1B-3'D10[+]	503	5.5	1.79883	0.528636	no	NA	TAS1B-3'D10[+]:AT5G26800.1	0.993487
AT5G27470.1	TAS1C-3'D5[-]	76	5.5	0.62568	1.62568	no	NA	TAS1C-3'D5[-]:AT5G27470.1	0.993487
AT5G27670.1	TAS3B-5'D7[+]	143	6	0.74655	0.87218	no	HTA7	TAS3B-5'D7[+]:HTA7	0.993487
AT5G28030.2	TAS3A-5'D2[-]	973	6	0.67545	0.504979	no	DES1	TAS3A-5'D2[-]:DES1	0.993487
AT5G28640.1	TAS2-3'D3[-]	988	5	1.21581	0.127534	no	AN3	TAS2-3'D3[-]:AN3	0.993487
AT5G37540.1	TAS3C-5'D4[-]	1395	6	0.6399	0.749713	no	NA	TAS3C-5'D4[-]:AT5G37540.1	0.993487
AT5G43870.1	TAS1C-3'D5[-]	1510	5.5	1.71351	0.924875	no	NA	TAS1C-3'D5[-]:AT5G43870.1	0.993487
AT5G45710.2	TAS3C-5'D3[+]	995	4.5	0.68967	1	no	AT-HSFA4C	TAS3C-5'D3[+]:AT-HSFA4C	0.993487
AT5G47020.1	TAS3B-5'D9[+]	4698	5.5	0.76077	0.325574	no	NA	TAS3B-5'D9[+]:AT5G47020.1	0.993487
AT5G47730.3	TAS1B-3'D8[+]	1154	5.5	0.60435	0.276987	no	NA	TAS1B-3'D8[+]:AT5G47730.3	0.993487
AT5G48220.3	TAS3A-5'D5[-]	1637	6	0.75366	0.64627	no	NA	TAS3A-5'D5[-]:AT5G48220.3	0.993487
AT5G48970.1	TAS3A-5'D2[-]	1260	5.5	0.5688	0.859729	no	NA	TAS3A-5'D2[-]:AT5G48970.1	0.993487
AT5G56520.1	TAS3A-5'D1[+]	986	5.5	0.56169	0.883369	no	NA	TAS3A-5'D1[+]:AT5G56520.1	0.993487
AT5G57370.1	TAS3C-5'D7[+]	890	6	1.67796	0.868557	no	NA	TAS3C-5'D7[+]:AT5G57370.1	0.993487
AT5G58330.3	TAS3C-5'D10[-]	619	6	0.59724	0.899859	no	NA	TAS3C-5'D10[-]:AT5G58330.3	0.993487
AT5G58520.1	TAS3B-5'D1[+]	1176	6	0.68256	1.68256	no	NA	TAS3B-5'D1[+]:AT5G58520.1	0.993487
AT5G61530.3	TAS4-3'D5[+]	1370	5	1.59975	0.718862	no	NA	TAS4-3'D5[+]:AT5G61530.3	0.993487
AT5G62000.4	TAS1B-3'D10[+]	3081	5	7.30908	0.843394	no	ARF1-BP	TAS1B-3'D10[+]:ARF1-BP	0.993487
AT5G62610.1	TAS3C-5'D2[+]	1149	5.5	1.32957	0.934407	no	NA	TAS3C-5'D2[+]:AT5G62610.1	0.993487
AT5G64610.1	TAS2-3'D4[-]	1456	5.5	1.67796	0.25611	no	HAM1	TAS2-3'D4[-]:HAM1	0.993487
AT5G64630.3	TAS4-3'D9[+]	1219	6	0.50481	0.90198	no	FAS2	TAS4-3'D9[+]:FAS2	0.993487
AT5G66050.2	TAS1C-3'D8[-]	1593	4.5	0.73944	0.0420381	no	NA	TAS1C-3'D8[-]:AT5G66050.2	0.993487
AT5G67070.1	TAS3A-5'D4[-]	137	5	0.84609	1.02771	no	RALFL34	TAS3A-5'D4[-]:RALFL34	0.993487
AT5G67490.1	TAS3C-5'D3[+]	693	5	1.59264	0.411265	no	NA	TAS3C-5'D3[+]:AT5G67490.1	0.993487
AT4G34140.3	TAS3B-5'D5[+]	1806	6	1.31535	0.500497	no	NA	TAS3B-5'D5[+]:AT4G34140.3	0.99899
AT5G46840.2	TAS3C-5'D4[-]	1566	6	0.77499	0.349819	no	NA	TAS3C-5'D4[-]:AT5G46840.2	0.99899
AT1G70700.2	TAS1C-3'D5[-]	1014	6	3.1284	0.130846	no	JAZ9	TAS1C-3'D5[-]:JAZ9	0.999964
AT1G75940.1	TAS2-3'D3[+]	1613	6	1.93392	0.072949	no	ATA27	TAS2-3'D3[+]:ATA27	0.999964
AT3G14740.2	TAS3C-5'D8[-]	1141	6	0.73944	0.454188	no	NA	TAS3C-5'D8[-]:AT3G14740.2	0.999964
AT3G55520.1	TAS3B-5'D9[+]	766	6	1.24425	0.277212	no	NA	TAS3B-5'D9[+]:AT3G55520.1	0.999964
AT3G59940.1	TAS3A-5'D2[-]	1325	6	0.72522	0.334387	no	NA	TAS3A-5'D2[-]:AT3G59940.1	0.999964
AT4G04640.1	TAS4-3'D9[-]	1325	6	1.25136	0.0985015	no	ATPC1	TAS4-3'D9[-]:ATPC1	0.999964
AT4G15110.1	TAS3C-5'D3[+]	1798	6	0.711	0.424686	no	CYP97B3	TAS3C-5'D3[+]:CYP97B3	0.999964
AT5G35630.3	TAS2-3'D4[+]	1421	6	3.69009	0.225086	no	ATGSL1	TAS2-3'D4[+]:ATGSL1	0.999964
AT5G43900.3	TAS1B-3'D8[-]	4966	6	0.78921	0.374671	no	ATMYA2	TAS1B-3'D8[-]:ATMYA2	0.999964

## Sheet: SRX283759
Target transcript	tasiRNA	tasiRNA slice site position in target transcript	Allen score of sRNA:target duplex	Slice site RPM	Slice site RPM + 1/Maximum adjacent site RPM + 1	Previously verified by 5' RACE?	Target gene common name	Interaction name	P-value adjusted for multiple testing
AT1G63130.1	TAS2-3'D6[-]	660	0.5	0.34235	0.723298	no	TAS8	TAS2-3'D6[-]:TAS8	0
AT2G27400.1	TAS1B-3'D6[-]	492	0	0.171175	1	no	TAS1a	TAS1B-3'D6[-]:TAS1a	0
AT2G33860.1	TAS3C-5'D5[+]	1685	1.5	0.684699	0.907766	yes	ARF3	TAS3C-5'D5[+]:ARF3	0
AT2G33860.1	TAS3C-5'D5[+]	1805	1	0.171175	0.695184	yes	ARF3	TAS3C-5'D5[+]:ARF3	0
AT5G60450.1	TAS3A-5'D8[+]	1884	1	0.34235	1.14616	yes	ARF4	TAS3A-5'D8[+]:ARF4	0
AT5G62000.4	TAS3A-5'D7[+]	1745	1.5	1.02705	1.51008	yes	ARF1-BP	TAS3A-5'D7[+]:ARF1-BP	0.0019593
AT5G18040.1	TAS1A-3'D2[+]	685	2	1.3694	1.76511	yes	NA	TAS1A-3'D2[+]:AT5G18040.1	0.00972839
AT4G29760.1	TAS1A-3'D6[+]	630	3	2.0541	2.01787	no	NA	TAS1A-3'D6[+]:AT4G29760.1	0.0145584
AT5G06600.3	TAS3C-5'D3[+]	1778	2	0.171175	1	no	AtUBP12	TAS3C-5'D3[+]:AtUBP12	0.0259237
AT3G25840.2	TAS3C-5'D3[+]	378	6	17.9734	7.46817	no	NA	TAS3C-5'D3[+]:AT3G25840.2	0.028816
AT4G29770.2	TAS1A-3'D6[+]	780	3	0.34235	1.34235	yes	NA	TAS1A-3'D6[+]:AT4G29770.2	0.028816
AT5G20240.1	TAS3A-5'D4[+]	146	5	10.6128	2.0657	no	PI	TAS3A-5'D4[+]:PI	0.153768
AT5G18065.1	TAS1A-3'D2[+]	736	2	0.171175	0.872481	no	NA	TAS1A-3'D2[+]:AT5G18065.1	0.202656
AT1G51670.1	TAS1A-3'D6[+]	536	3.5	0.171175	1.17118	no	NA	TAS1A-3'D6[+]:AT1G51670.1	0.238554
AT4G15650.1	TAS1B-3'D4[-]	431	3	0.171175	1	no	NA	TAS1B-3'D4[-]:AT4G15650.1	0.318199
AT1G64380.1	TAS3B-5'D7[+]	870	4	0.171175	1.17118	no	NA	TAS3B-5'D7[+]:AT1G64380.1	0.333762
AT5G35910.1	TAS4-3'D9[+]	2381	4	0.34235	1.14616	no	NA	TAS4-3'D9[+]:AT5G35910.1	0.372046
AT4G11450.1	TAS3C-5'D4[+]	411	4.5	0.171175	1.17118	no	NA	TAS3C-5'D4[+]:AT4G11450.1	0.430888
AT5G08305.1	TAS1C-3'D7[+]	1613	5.5	0.513525	1.51353	no	NA	TAS1C-3'D7[+]:AT5G08305.1	0.431837
AT5G66050.2	TAS1C-3'D8[-]	1593	4.5	1.02705	1.33929	no	NA	TAS1C-3'D8[-]:AT5G66050.2	0.452693
AT1G80120.1	TAS3B-5'D7[+]	81	4	0.34235	1	no	NA	TAS3B-5'D7[+]:AT1G80120.1	0.461905
AT5G18230.2	TAS3A-5'D4[+]	505	5	0.171175	1.17118	no	NA	TAS3A-5'D4[+]:AT5G18230.2	0.461905
AT2G16890.2	TAS1A-3'D7[-]	1087	4.5	1.19822	1.18447	no	NA	TAS1A-3'D7[-]:AT2G16890.2	0.486645
AT2G25480.1	TAS1C-3'D4[+]	1030	5	0.34235	1.34235	no	NA	TAS1C-3'D4[+]:AT2G25480.1	0.486645
AT3G63240.1	TAS2-3'D5[+]	1901	3.5	0.171175	1	no	NA	TAS2-3'D5[+]:AT3G63240.1	0.486645
AT1G04350.1	TAS1B-3'D1[+]	578	4.5	0.171175	1.17118	no	NA	TAS1B-3'D1[+]:AT1G04350.1	0.52421
AT1G23640.1	TAS1A-3'D3[-]	1239	4	0.513525	1.12752	no	NA	TAS1A-3'D3[-]:AT1G23640.1	0.52421
AT2G27950.1	TAS3C-5'D4[+]	2111	4	0.171175	1	no	NA	TAS3C-5'D4[+]:AT2G27950.1	0.52421
AT5G37710.1	TAS1A-3'D9[-]	1005	4.5	0.34235	1.14616	no	NA	TAS1A-3'D9[-]:AT5G37710.1	0.52421
AT1G44910.2	TAS3B-5'D7[+]	1994	3	0.171175	0.773806	no	ATPRP40A	TAS3B-5'D7[+]:ATPRP40A	0.570071
AT1G71710.2	TAS3B-5'D7[+]	1826	3.5	0.171175	0.872481	no	NA	TAS3B-5'D7[+]:AT1G71710.2	0.570071
AT2G28630.1	TAS3B-5'D10[-]	696	4	0.171175	1	no	KCS12	TAS3B-5'D10[-]:KCS12	0.570071
AT3G19240.1	TAS4-3'D3[+]	1193	3	0.34235	0.723298	no	NA	TAS4-3'D3[+]:AT3G19240.1	0.570071
AT4G17230.1	TAS3B-5'D7[+]	1570	4.5	0.34235	1	no	SCL13	TAS3B-5'D7[+]:SCL13	0.570071
AT5G11450.1	TAS3B-5'D7[+]	299	4.5	0.171175	1	no	PPD5	TAS3B-5'D7[+]:PPD5	0.570071
AT5G60800.2	TAS3C-5'D3[+]	692	4.5	0.513525	1	no	NA	TAS3C-5'D3[+]:AT5G60800.2	0.570071
AT1G12240.1	TAS1C-3'D1[-]	478	5	0.171175	1.17118	no	ATBETAFRUCT4	TAS1C-3'D1[-]:ATBETAFRUCT4	0.572566
AT5G20680.3	TAS3B-5'D9[+]	2040	4.5	0.171175	1	no	TBL16	TAS3B-5'D9[+]:TBL16	0.572566
AT3G55690.1	TAS3C-5'D2[+]	989	4.5	0.855874	1	no	NA	TAS3C-5'D2[+]:AT3G55690.1	0.574686
AT4G04320.2	TAS1A-3'D5[+]	121	6	0.513525	1.29231	no	NA	TAS1A-3'D5[+]:AT4G04320.2	0.574686
AT5G47050.1	TAS3C-5'D3[-]	256	6	0.171175	1.17118	no	NA	TAS3C-5'D3[-]:AT5G47050.1	0.579183
AT3G18524.1	TAS2-3'D3[+]	842	5.5	0.171175	1.17118	no	ATMSH2	TAS2-3'D3[+]:ATMSH2	0.622592
AT3G23210.1	TAS1C-3'D7[-]	392	4.5	0.171175	1	no	bHLH34	TAS1C-3'D7[-]:bHLH34	0.622592
AT5G01410.1	TAS1C-3'D7[-]	1134	4.5	0.171175	1	no	ATPDX1	TAS1C-3'D7[-]:ATPDX1	0.622592
AT3G06920.1	TAS3C-5'D5[+]	2216	5	0.171175	1.17118	no	NA	TAS3C-5'D5[+]:AT3G06920.1	0.65102
AT3G54930.1	TAS1C-3'D5[-]	1486	4	0.171175	1	no	NA	TAS1C-3'D5[-]:AT3G54930.1	0.65102
AT4G18030.1	TAS1C-3'D7[-]	1758	4	0.171175	1	no	NA	TAS1C-3'D7[-]:AT4G18030.1	0.65102
AT4G24290.2	TAS3C-5'D5[+]	2032	4	0.171175	1	no	NA	TAS3C-5'D5[+]:AT4G24290.2	0.65102
AT5G03040.3	TAS2-3'D4[-]	1222	5	0.171175	1.17118	no	iqd2	TAS2-3'D4[-]:iqd2	0.65102
AT1G74900.1	TAS1C-3'D10[-]	581	4	0.171175	1	no	OTP43	TAS1C-3'D10[-]:OTP43	0.661393
AT1G09770.1	TAS3A-5'D8[+]	2825	6	0.171175	1.17118	no	ATCDC5	TAS3A-5'D8[+]:ATCDC5	0.664031
AT1G10670.4	TAS4-3'D4[+]	690	5.5	0.171175	1	no	ACLA-1	TAS4-3'D4[+]:ACLA-1	0.664031
AT1G56510.1	TAS3C-5'D8[-]	619	6	0.171175	1.17118	no	ADR2	TAS3C-5'D8[-]:ADR2	0.664031
AT1G64950.1	TAS3A-5'D4[+]	813	4	0.171175	0.872481	no	CYP89A5	TAS3A-5'D4[+]:CYP89A5	0.664031
AT2G34170.2	TAS3B-5'D7[+]	299	5	0.171175	1	no	NA	TAS3B-5'D7[+]:AT2G34170.2	0.664031
AT3G12020.2	TAS2-3'D6[+]	1376	4.5	0.171175	1	no	NA	TAS2-3'D6[+]:AT3G12020.2	0.664031
AT3G50950.2	TAS3A-5'D9[+]	1248	6	0.171175	1.17118	no	ZAR1	TAS3A-5'D9[+]:ZAR1	0.664031
AT3G55750.1	TAS3C-5'D9[-]	22	6	1.54057	1.25333	no	NA	TAS3C-5'D9[-]:AT3G55750.1	0.664031
AT4G00840.1	TAS3A-5'D4[-]	661	5.5	0.171175	1.17118	no	NA	TAS3A-5'D4[-]:AT4G00840.1	0.664031
AT4G02510.1	TAS3C-5'D2[+]	2768	3.5	0.171175	0.695184	no	ATTOC159	TAS3C-5'D2[+]:ATTOC159	0.664031
AT5G02810.1	TAS3B-5'D5[+]	337	4	0.171175	0.872481	no	APRR7	TAS3B-5'D5[+]:APRR7	0.664031
AT5G51150.1	TAS3A-5'D4[-]	375	5.5	0.171175	1.17118	no	NA	TAS3A-5'D4[-]:AT5G51150.1	0.664031
AT1G08510.1	TAS3B-5'D7[+]	1537	4.5	0.34235	1	no	FATB	TAS3B-5'D7[+]:FATB	0.678767
AT1G12300.1	TAS1C-3'D10[-]	1358	4.5	0.171175	1	no	NA	TAS1C-3'D10[-]:AT1G12300.1	0.678767
AT1G70680.1	TAS1A-3'D7[-]	577	5.5	0.171175	1.17118	no	NA	TAS1A-3'D7[-]:AT1G70680.1	0.678767
AT1G71440.1	TAS3B-5'D5[+]	1289	4.5	0.171175	1	no	PFI	TAS3B-5'D5[+]:PFI	0.678767
AT1G75870.1	TAS1A-3'D7[-]	562	4.5	0.513525	1	no	NA	TAS1A-3'D7[-]:AT1G75870.1	0.678767
AT2G04865.1	TAS3B-5'D7[+]	1757	6	0.171175	1.17118	no	NA	TAS3B-5'D7[+]:AT2G04865.1	0.678767
AT2G43340.1	TAS4-3'D6[+]	643	3.5	0.171175	0.695184	no	NA	TAS4-3'D6[+]:AT2G43340.1	0.678767
AT3G10040.1	TAS1A-3'D7[-]	1144	6	1.19822	1.18447	no	NA	TAS1A-3'D7[-]:AT3G10040.1	0.678767
AT3G49060.2	TAS3B-5'D7[+]	843	5.5	0.171175	1.17118	no	NA	TAS3B-5'D7[+]:AT3G49060.2	0.678767
AT4G01210.1	TAS3B-5'D7[+]	2041	5	0.34235	1.14616	no	NA	TAS3B-5'D7[+]:AT4G01210.1	0.678767
AT4G03260.2	TAS1C-3'D4[-]	1313	6	0.171175	1.17118	no	NA	TAS1C-3'D4[-]:AT4G03260.2	0.678767
AT5G02510.1	TAS1A-3'D5[-]	103	6	0.171175	1.17118	no	NA	TAS1A-3'D5[-]:AT5G02510.1	0.678767
AT5G13380.1	TAS4-3'D10[-]	1192	6	0.171175	1.17118	no	NA	TAS4-3'D10[-]:AT5G13380.1	0.678767
AT5G22010.1	TAS3C-5'D1[+]	3002	5.5	0.171175	1.17118	no	AtRFC1	TAS3C-5'D1[+]:AtRFC1	0.678767
AT5G27720.1	TAS3C-5'D6[+]	219	4.5	0.513525	1	no	emb1644	TAS3C-5'D6[+]:emb1644	0.678767
AT5G28237.1	TAS2-3'D3[+]	768	4.5	0.171175	1	no	NA	TAS2-3'D3[+]:AT5G28237.1	0.678767
AT5G46840.2	TAS3A-5'D9[+]	189	6	0.855874	1.22619	no	NA	TAS3A-5'D9[+]:AT5G46840.2	0.678767
AT5G67150.1	TAS3A-5'D7[+]	327	5.5	0.171175	1.17118	no	NA	TAS3A-5'D7[+]:AT5G67150.1	0.678767
AT2G44230.1	TAS4-3'D6[+]	1488	5	0.34235	1.14616	no	NA	TAS4-3'D6[+]:AT2G44230.1	0.683128
AT4G24040.1	TAS2-3'D8[-]	1560	5	0.513525	1	no	ATTRE1	TAS2-3'D8[-]:ATTRE1	0.701061
AT5G16970.1	TAS1A-3'D7[-]	995	3.5	0.171175	0.532783	no	AER	TAS1A-3'D7[-]:AER	0.715685
AT1G07630.1	TAS4-3'D7[-]	2178	5.5	0.34235	1	no	PLL5	TAS4-3'D7[-]:PLL5	0.722307
AT1G28280.2	TAS3C-5'D4[+]	971	5.5	0.171175	1	no	NA	TAS3C-5'D4[+]:AT1G28280.2	0.722307
AT1G44780.2	TAS3C-5'D3[+]	207	6	0.171175	1	no	NA	TAS3C-5'D3[+]:AT1G44780.2	0.722307
AT1G48175.1	TAS1C-3'D1[-]	21	5	0.171175	1	no	emb2191	TAS1C-3'D1[-]:emb2191	0.722307
AT1G48350.1	TAS2-3'D1[-]	336	4	0.171175	0.872481	no	EMB3105	TAS2-3'D1[-]:EMB3105	0.722307
AT1G50920.1	TAS3C-5'D2[+]	2029	5.5	0.171175	1	no	NA	TAS3C-5'D2[+]:AT1G50920.1	0.722307
AT1G64330.1	TAS3C-5'D7[-]	1902	3.5	0.171175	0.631064	no	NA	TAS3C-5'D7[-]:AT1G64330.1	0.722307
AT1G67630.1	TAS1B-3'D4[+]	1803	5	0.171175	1	no	EMB2814	TAS1B-3'D4[+]:EMB2814	0.722307
AT1G68780.1	TAS3C-5'D3[-]	487	5	0.34235	1.14616	no	NA	TAS3C-5'D3[-]:AT1G68780.1	0.722307
AT1G72040.1	TAS3B-5'D9[+]	1365	6	0.34235	1.14616	no	AtdNK	TAS3B-5'D9[+]:AtdNK	0.722307
AT1G75550.1	TAS3A-5'D1[+]	289	6	0.171175	1	no	NA	TAS3A-5'D1[+]:AT1G75550.1	0.722307
AT1G76820.1	TAS4-3'D9[+]	585	5.5	0.171175	1	no	NA	TAS4-3'D9[+]:AT1G76820.1	0.722307
AT2G07180.2	TAS3B-5'D7[+]	1346	6	0.171175	1	no	NA	TAS3B-5'D7[+]:AT2G07180.2	0.722307
AT2G26890.1	TAS3B-5'D5[-]	5837	5	0.171175	1	no	GRV2	TAS3B-5'D5[-]:GRV2	0.722307
AT2G26930.1	TAS3B-5'D6[+]	553	5.5	0.171175	1	no	ATCDPMEK	TAS3B-5'D6[+]:ATCDPMEK	0.722307
AT2G42270.1	TAS3B-5'D9[+]	1057	6	0.171175	1	no	NA	TAS3B-5'D9[+]:AT2G42270.1	0.722307
AT2G44440.1	TAS3B-5'D6[-]	228	5	0.171175	1	no	AtEML4	TAS3B-5'D6[-]:AtEML4	0.722307
AT3G03330.1	TAS3A-5'D8[+]	186	5.5	0.34235	1	no	NA	TAS3A-5'D8[+]:AT3G03330.1	0.722307
AT3G05060.1	TAS3C-5'D3[+]	1690	6	0.684699	1	no	NA	TAS3C-5'D3[+]:AT3G05060.1	0.722307
AT3G13380.1	TAS3B-5'D9[+]	2994	5.5	0.171175	1	no	BRL3	TAS3B-5'D9[+]:BRL3	0.722307
AT3G16340.2	TAS3C-5'D9[+]	3767	5	0.171175	1	no	ABCG29	TAS3C-5'D9[+]:ABCG29	0.722307
AT3G16630.2	TAS1C-3'D7[-]	2545	5.5	0.34235	1	no	ATKINESIN-13A	TAS1C-3'D7[-]:ATKINESIN-13A	0.722307
AT3G42996.1	TAS3B-5'D9[+]	1251	6	0.171175	1	no	NA	TAS3B-5'D9[+]:AT3G42996.1	0.722307
AT3G53580.1	TAS1A-3'D3[+]	875	5.5	0.34235	1.14616	no	NA	TAS1A-3'D3[+]:AT3G53580.1	0.722307
AT4G10770.1	TAS3B-5'D9[+]	793	6	0.171175	1	no	ATOPT7	TAS3B-5'D9[+]:ATOPT7	0.722307
AT4G12420.2	TAS3B-5'D7[+]	1677	4.5	0.171175	0.872481	no	SKU5	TAS3B-5'D7[+]:SKU5	0.722307
AT4G16155.1	TAS3B-5'D9[+]	1564	6	0.684699	1	no	NA	TAS3B-5'D9[+]:AT4G16155.1	0.722307
AT4G30110.1	TAS1C-3'D7[-]	1690	5	0.171175	1	no	ATHMA2	TAS1C-3'D7[-]:ATHMA2	0.722307
AT4G31990.4	TAS2-3'D8[-]	682	5.5	0.34235	1	no	AAT3	TAS2-3'D8[-]:AAT3	0.722307
AT4G36520.1	TAS3B-5'D9[+]	2941	5.5	0.171175	1	no	NA	TAS3B-5'D9[+]:AT4G36520.1	0.722307
AT5G07790.2	TAS3B-5'D7[+]	1502	6	0.855874	1	no	NA	TAS3B-5'D7[+]:AT5G07790.2	0.722307
AT5G10290.1	TAS1B-3'D4[-]	1885	5.5	0.34235	1	no	NA	TAS1B-3'D4[-]:AT5G10290.1	0.722307
AT5G15920.1	TAS3B-5'D9[+]	1288	6	0.171175	1	no	EMB2782	TAS3B-5'D9[+]:EMB2782	0.722307
AT5G19740.1	TAS1A-3'D7[-]	513	4.5	0.171175	0.872481	no	NA	TAS1A-3'D7[-]:AT5G19740.1	0.722307
AT5G33370.2	TAS3C-5'D4[-]	1300	3.5	0.171175	0.872481	no	NA	TAS3C-5'D4[-]:AT5G33370.2	0.722307
AT5G42870.2	TAS1A-3'D7[-]	536	4.5	0.171175	0.872481	no	ATPAH2	TAS1A-3'D7[-]:ATPAH2	0.722307
AT5G46450.1	TAS4-3'D1[-]	556	6	0.34235	1.14616	no	NA	TAS4-3'D1[-]:AT5G46450.1	0.722307
AT5G49880.1	TAS1C-3'D5[-]	1313	5.5	0.171175	1	no	AtMAD1	TAS1C-3'D5[-]:AtMAD1	0.722307
AT4G29920.1	TAS2-3'D1[+]	1054	6	0.171175	1.17118	no	NA	TAS2-3'D1[+]:AT4G29920.1	0.73038
AT2G18900.1	TAS1A-3'D7[-]	2340	6	0.171175	1	no	NA	TAS1A-3'D7[-]:AT2G18900.1	0.734267
AT3G20540.2	TAS1A-3'D7[-]	2716	6	0.171175	1	no	POLGAMMA1	TAS1A-3'D7[-]:POLGAMMA1	0.734267
AT1G29470.2	TAS4-3'D1[-]	1529	4	0.34235	0.796789	no	NA	TAS4-3'D1[-]:AT1G29470.2	0.738598
AT1G44820.1	TAS4-3'D2[-]	596	6	0.171175	1	no	NA	TAS4-3'D2[-]:AT1G44820.1	0.738598
AT4G25230.2	TAS1B-3'D3[+]	940	5.5	0.171175	1	no	RIN2	TAS1B-3'D3[+]:RIN2	0.738598
AT4G29210.2	TAS3A-5'D9[+]	1707	6	0.171175	1	no	GGT3	TAS3A-5'D9[+]:GGT3	0.738598
AT5G06560.1	TAS3C-5'D9[+]	1964	4	0.171175	0.695184	no	NA	TAS3C-5'D9[+]:AT5G06560.1	0.738598
AT5G28770.3	TAS4-3'D9[+]	422	6	0.171175	1	no	AtbZIP63	TAS4-3'D9[+]:AtbZIP63	0.738598
AT5G43950.1	TAS3B-5'D1[+]	1559	4	0.171175	0.631064	no	NA	TAS3B-5'D1[+]:AT5G43950.1	0.738598
AT1G66330.2	TAS3A-5'D4[+]	899	5	0.34235	1	no	NA	TAS3A-5'D4[+]:AT1G66330.2	0.739349
AT3G09670.2	TAS4-3'D8[-]	2099	5	0.171175	1	no	NA	TAS4-3'D8[-]:AT3G09670.2	0.739349
AT3G09730.2	TAS3C-5'D8[-]	396	5	0.171175	1	no	NA	TAS3C-5'D8[-]:AT3G09730.2	0.739349
AT4G35670.1	TAS4-3'D6[-]	334	4.5	0.171175	1	no	NA	TAS4-3'D6[-]:AT4G35670.1	0.739349
AT3G51940.1	TAS4-3'D2[-]	952	5	0.171175	1	no	NA	TAS4-3'D2[-]:AT3G51940.1	0.742187
AT5G13400.1	TAS1A-3'D9[-]	1750	6	0.513525	1	no	NA	TAS1A-3'D9[-]:AT5G13400.1	0.750202
AT2G30330.1	TAS1B-3'D1[+]	528	6	0.34235	1.14616	no	BLOS1	TAS1B-3'D1[+]:BLOS1	0.751048
AT3G62000.2	TAS1C-3'D6[-]	980	6	0.171175	1	no	NA	TAS1C-3'D6[-]:AT3G62000.2	0.758927
AT4G17240.2	TAS3C-5'D8[-]	1016	6	0.171175	1	no	NA	TAS3C-5'D8[-]:AT4G17240.2	0.758927
AT5G51040.3	TAS3C-5'D8[-]	36	6	0.171175	1	no	SDHAF2	TAS3C-5'D8[-]:SDHAF2	0.758927
AT1G08190.1	TAS3C-5'D2[+]	2219	6	0.34235	1	no	ATVAM2	TAS3C-5'D2[+]:ATVAM2	0.763536
AT2G04350.2	TAS1B-3'D7[-]	1814	6	0.171175	1	no	LACS8	TAS1B-3'D7[-]:LACS8	0.763536
AT2G38430.1	TAS3B-5'D5[-]	311	6	0.171175	1	no	NA	TAS3B-5'D5[-]:AT2G38430.1	0.763536
AT2G40650.1	TAS3C-5'D3[+]	1134	4	0.171175	0.532783	no	NA	TAS3C-5'D3[+]:AT2G40650.1	0.763536
AT3G03140.1	TAS2-3'D8[-]	434	6	0.171175	1	no	NA	TAS2-3'D8[-]:AT3G03140.1	0.763536
AT3G12110.1	TAS3C-5'D1[+]	804	6	0.171175	1	no	ACT11	TAS3C-5'D1[+]:ACT11	0.763536
AT4G04960.1	TAS2-3'D10[+]	1683	6	0.171175	1	no	NA	TAS2-3'D10[+]:AT4G04960.1	0.763536
AT5G48120.1	TAS3A-5'D10[-]	3184	4	0.171175	0.773806	no	MET18	TAS3A-5'D10[-]:MET18	0.763536
AT3G11500.1	TAS4-3'D9[+]	286	4	0.513525	0.342156	no	NA	TAS4-3'D9[+]:AT3G11500.1	0.768052
AT1G06820.1	TAS3C-5'D4[+]	986	4.5	0.171175	0.773806	no	CCR2	TAS3C-5'D4[+]:CCR2	0.772143
AT1G08180.1	TAS3B-5'D7[+]	78	5	0.171175	0.872481	no	NA	TAS3B-5'D7[+]:AT1G08180.1	0.772143
AT1G71210.1	TAS3C-5'D2[+]	2141	4	0.171175	0.27542	no	NA	TAS3C-5'D2[+]:AT1G71210.1	0.772143
AT2G35650.1	TAS3C-5'D4[+]	715	6	0.34235	1	no	ATCSLA07	TAS3C-5'D4[+]:ATCSLA07	0.772143
AT2G39220.1	TAS3C-5'D1[+]	385	4.5	0.171175	0.773806	no	PLA IIB	TAS3C-5'D1[+]:PLA IIB	0.772143
AT3G28830.1	TAS3C-5'D4[+]	489	4.5	0.171175	0.773806	no	NA	TAS3C-5'D4[+]:AT3G28830.1	0.772143
AT1G06420.2	TAS3C-5'D3[+]	190	4	0.684699	0.450599	no	NA	TAS3C-5'D3[+]:AT1G06420.2	0.773465
AT2G34260.2	TAS3B-5'D4[+]	334	6	0.171175	1	no	WDR55	TAS3B-5'D4[+]:WDR55	0.773465
AT1G32750.1	TAS3A-5'D6[+]	5178	4	0.171175	0.383476	no	GTD1	TAS3A-5'D6[+]:GTD1	0.773933
AT1G47870.2	TAS1B-3'D10[+]	768	4	0.34235	0.395221	no	ATE2F2	TAS1B-3'D10[+]:ATE2F2	0.773933
AT1G51538.1	TAS3C-5'D10[+]	1615	5	0.171175	0.872481	no	NA	TAS3C-5'D10[+]:AT1G51538.1	0.784094
AT4G23500.1	TAS1B-3'D8[-]	1118	4	0.171175	0.313249	no	NA	TAS1B-3'D8[-]:AT4G23500.1	0.784094
AT4G26080.1	TAS3C-5'D3[+]	1464	4	0.34235	0.376259	no	ABI1	TAS3C-5'D3[+]:ABI1	0.784094
AT5G08200.1	TAS3C-5'D2[+]	1681	5	0.171175	0.872481	no	NA	TAS3C-5'D2[+]:AT5G08200.1	0.784094
AT5G50460.1	TAS1A-3'D8[-]	189	4	0.171175	0.577773	no	NA	TAS1A-3'D8[-]:AT5G50460.1	0.784094
AT5G16780.1	TAS3B-5'D7[+]	571	4	3.4235	0.47996	no	DOT2	TAS3B-5'D7[+]:DOT2	0.784221
AT3G02770.1	TAS2-3'D9[-]	342	4.5	0.171175	0.773806	no	NA	TAS2-3'D9[-]:AT3G02770.1	0.792095
AT3G54690.1	TAS3B-5'D10[+]	789	4	0.171175	0.406246	no	SETH3	TAS3B-5'D10[+]:SETH3	0.792095
AT5G22000.3	TAS3A-5'D6[+]	1212	4	0.171175	0.196372	no	RHF2A	TAS3A-5'D6[+]:RHF2A	0.792095
AT1G19650.2	TAS3A-5'D8[+]	2124	5	0.171175	1	no	NA	TAS3A-5'D8[+]:AT1G19650.2	0.800072
AT1G43170.9	TAS2-3'D8[-]	1172	5	0.171175	1	no	ARP1	TAS2-3'D8[-]:ARP1	0.800072
AT1G80810.2	TAS1C-3'D4[+]	374	5	0.171175	1	no	NA	TAS1C-3'D4[+]:AT1G80810.2	0.800072
AT2G37940.1	TAS3C-5'D6[+]	452	5	0.171175	1	no	AtIPCS2	TAS3C-5'D6[+]:AtIPCS2	0.82129
AT2G45650.1	TAS1A-3'D3[-]	445	5	0.34235	1	no	AGL6	TAS1A-3'D3[-]:AGL6	0.82694
AT3G52110.2	TAS3B-5'D9[+]	1005	5.5	0.171175	1	no	NA	TAS3B-5'D9[+]:AT3G52110.2	0.82694
AT4G27340.1	TAS3C-5'D3[+]	788	4.5	0.171175	0.872481	no	NA	TAS3C-5'D3[+]:AT4G27340.1	0.82694
AT5G02860.1	TAS3A-5'D9[+]	1231	5.5	0.171175	1	no	NA	TAS3A-5'D9[+]:AT5G02860.1	0.82694
AT5G27440.1	TAS3A-5'D1[+]	304	6	0.34235	1.14616	no	NA	TAS3A-5'D1[+]:AT5G27440.1	0.82694
AT5G38410.3	TAS3C-5'D8[-]	100	4.5	0.171175	0.872481	no	RBCS3B	TAS3C-5'D8[-]:RBCS3B	0.82694
AT5G49550.1	TAS3C-5'D8[-]	236	5.5	0.34235	1	no	BLOS2	TAS3C-5'D8[-]:BLOS2	0.82694
AT4G22670.1	TAS3C-5'D3[-]	1568	4.5	0.171175	1	no	AtHip1	TAS3C-5'D3[-]:AtHip1	0.835656
AT1G05410.2	TAS1C-3'D10[+]	1315	6	0.171175	1	no	NA	TAS1C-3'D10[+]:AT1G05410.2	0.838971
AT1G10490.1	TAS3C-5'D8[-]	2896	6	0.171175	1	no	NA	TAS3C-5'D8[-]:AT1G10490.1	0.838971
AT1G15240.3	TAS3B-5'D9[+]	1951	5	0.171175	0.872481	no	NA	TAS3B-5'D9[+]:AT1G15240.3	0.838971
AT1G47830.1	TAS2-3'D4[-]	246	4	0.34235	0.192008	no	NA	TAS2-3'D4[-]:AT1G47830.1	0.838971
AT1G74030.1	TAS3C-5'D4[+]	760	5	0.171175	0.872481	no	ENO1	TAS3C-5'D4[+]:ENO1	0.838971
AT1G76660.1	TAS1B-3'D8[-]	1839	4.5	0.171175	0.631064	no	NA	TAS1B-3'D8[-]:AT1G76660.1	0.838971
AT2G19110.1	TAS1A-3'D9[-]	2223	4.5	0.34235	0.723298	no	ATHMA4	TAS1A-3'D9[-]:ATHMA4	0.838971
AT2G22960.1	TAS3C-5'D3[+]	202	5	0.171175	0.872481	no	NA	TAS3C-5'D3[+]:AT2G22960.1	0.838971
AT2G31360.1	TAS3B-5'D9[+]	1005	6	0.171175	1	no	ADS2	TAS3B-5'D9[+]:ADS2	0.838971
AT2G41870.1	TAS3C-5'D1[+]	691	6	0.171175	1	no	NA	TAS3C-5'D1[+]:AT2G41870.1	0.838971
AT2G46300.1	TAS3A-5'D10[+]	889	5	0.171175	0.872481	no	NA	TAS3A-5'D10[+]:AT2G46300.1	0.838971
AT3G10030.2	TAS3B-5'D7[+]	589	4	0.171175	0.0595772	no	NA	TAS3B-5'D7[+]:AT3G10030.2	0.838971
AT3G16180.1	TAS4-3'D9[+]	1888	5	0.171175	0.872481	no	NA	TAS4-3'D9[+]:AT3G16180.1	0.838971
AT3G24490.1	TAS3B-5'D7[+]	1038	5	0.171175	0.872481	no	NA	TAS3B-5'D7[+]:AT3G24490.1	0.838971
AT3G46510.1	TAS1C-3'D8[+]	2023	5.5	0.171175	1	no	ATPUB13	TAS1C-3'D8[+]:ATPUB13	0.838971
AT4G12780.2	TAS3B-5'D9[+]	1648	6	0.171175	1	no	NA	TAS3B-5'D9[+]:AT4G12780.2	0.838971
AT4G24290.2	TAS3C-5'D3[+]	2072	5	0.171175	0.872481	no	NA	TAS3C-5'D3[+]:AT4G24290.2	0.838971
AT4G30940.1	TAS2-3'D6[-]	830	6	0.171175	1	no	NA	TAS2-3'D6[-]:AT4G30940.1	0.838971
AT5G01090.1	TAS3C-5'D8[-]	1277	5	0.171175	0.872481	no	NA	TAS3C-5'D8[-]:AT5G01090.1	0.838971
AT5G06680.1	TAS1A-3'D9[-]	600	6	0.171175	1	no	ATGCP3	TAS1A-3'D9[-]:ATGCP3	0.838971
AT5G16620.1	TAS3C-5'D3[+]	796	6	0.171175	1	no	ATTIC40	TAS3C-5'D3[+]:ATTIC40	0.838971
AT5G18520.1	TAS4-3'D9[+]	1334	6	0.34235	1	no	Cand7	TAS4-3'D9[+]:Cand7	0.838971
AT5G42620.2	TAS3A-5'D2[+]	1551	6	0.171175	1	no	NA	TAS3A-5'D2[+]:AT5G42620.2	0.838971
AT5G46510.1	TAS3B-5'D7[+]	4160	5	0.171175	0.872481	no	NA	TAS3B-5'D7[+]:AT5G46510.1	0.838971
AT5G48970.1	TAS3A-5'D2[-]	1260	5.5	0.684699	1	no	NA	TAS3A-5'D2[-]:AT5G48970.1	0.838971
AT5G57150.4	TAS3C-5'D1[+]	134	6	0.171175	1	no	NA	TAS3C-5'D1[+]:AT5G57150.4	0.838971
AT5G62130.2	TAS3B-5'D7[-]	294	5	0.171175	1	no	NA	TAS3B-5'D7[-]:AT5G62130.2	0.838971
AT5G62390.1	TAS3B-5'D7[+]	854	4	0.34235	0.315675	no	ATBAG7	TAS3B-5'D7[+]:ATBAG7	0.838971
ATCG00830.1	TAS3B-5'D9[+]	771	4.5	0.684699	0.831109	no	RPL2.1	TAS3B-5'D9[+]:RPL2.1	0.838971
AT2G39730.3	TAS2-3'D8[-]	283	5	0.34235	0.886903	no	RCA	TAS2-3'D8[-]:RCA	0.841643
AT3G58840.2	TAS1A-3'D9[-]	422	4.5	0.684699	0.621259	no	PMD1	TAS1A-3'D9[-]:PMD1	0.841643
AT2G01755.1	TAS3A-5'D9[+]	232	4.5	0.171175	0.577773	no	NA	TAS3A-5'D9[+]:AT2G01755.1	0.860094
AT3G54340.1	TAS2-3'D3[+]	496	4.5	0.34235	0.495012	no	AP3	TAS2-3'D3[+]:AP3	0.860094
AT5G65250.1	TAS3C-5'D6[+]	393	6	0.171175	1	no	NA	TAS3C-5'D6[+]:AT5G65250.1	0.860094
AT1G62910.1	TAS3C-5'D3[+]	1245	5.5	0.126669	0.961999	no	RFL9	TAS3C-5'D3[+]:RFL9	0.864881
AT5G47140.1	TAS1A-3'D3[-]	1276	5	0.171175	0.872481	no	GATA27	TAS1A-3'D3[-]:GATA27	0.864881
AT2G45960.3	TAS1B-3'D4[+]	1185	6	0.171175	1	no	ATHH2	TAS1B-3'D4[+]:ATHH2	0.883883
AT1G42550.1	TAS3A-5'D1[+]	2397	4.5	0.684699	0.621259	no	PMI1	TAS3A-5'D1[+]:PMI1	0.890367
AT1G45249.3	TAS3C-5'D3[+]	1190	5.5	0.34235	0.886903	no	ABF2	TAS3C-5'D3[+]:ABF2	0.898891
AT5G67380.2	TAS3B-5'D3[-]	219	4.5	0.684699	0.663119	no	ATCKA1	TAS3B-5'D3[-]:ATCKA1	0.899767
AT5G65620.1	TAS2-3'D5[+]	1820	5	0.171175	0.872481	no	NA	TAS2-3'D5[+]:AT5G65620.1	0.904788
AT1G78820.1	TAS3C-5'D8[-]	1333	5	0.171175	0.773806	no	NA	TAS3C-5'D8[-]:AT1G78820.1	0.908456
AT4G13550.1	TAS1A-3'D7[-]	2490	5	0.171175	0.773806	no	NA	TAS1A-3'D7[-]:AT4G13550.1	0.908456
AT4G25570.1	TAS3B-5'D7[+]	50	5	0.171175	0.773806	no	ACYB-2	TAS3B-5'D7[+]:ACYB-2	0.908456
AT4G26900.1	TAS3B-5'D7[+]	1314	5	0.34235	0.796789	no	AT-HF	TAS3B-5'D7[+]:AT-HF	0.908456
AT4G27180.1	TAS3C-5'D8[-]	169	5.5	0.34235	0.886903	no	ATK2	TAS3C-5'D8[-]:ATK2	0.908456
AT5G14370.1	TAS3B-5'D7[+]	373	4.5	0.34235	0.610653	no	NA	TAS3B-5'D7[+]:AT5G14370.1	0.908456
AT3G20040.1	TAS1C-3'D5[-]	1036	5.5	0.171175	0.872481	no	ATHXK4	TAS1C-3'D5[-]:ATHXK4	0.950412
AT5G37370.4	TAS3B-5'D7[+]	953	5.5	1.19822	0.927754	no	ATSRL1	TAS3B-5'D7[+]:ATSRL1	0.951894
AT1G75930.1	TAS3A-5'D5[+]	662	4.5	0.171175	0.171728	no	EXL6	TAS3A-5'D5[+]:EXL6	0.9575
AT5G19990.1	TAS3B-5'D6[+]	963	4.5	0.171175	0.0391324	no	ATSUG1	TAS3B-5'D6[+]:ATSUG1	0.9575
AT5G40140.1	TAS3A-5'D4[+]	1329	5	0.171175	0.773806	no	NA	TAS3A-5'D4[+]:AT5G40140.1	0.9575
AT5G61330.1	TAS3A-5'D1[+]	386	5.5	0.34235	0.886903	no	NA	TAS3A-5'D1[+]:AT5G61330.1	0.958243
AT3G50890.1	TAS3B-5'D7[+]	692	4.5	1.88292	0.497664	no	AtHB28	TAS3B-5'D7[+]:AtHB28	0.96843
AT1G30360.1	TAS2-3'D3[+]	2344	5.5	0.34235	0.886903	no	ERD4	TAS2-3'D3[+]:ERD4	0.972538
AT4G04460.2	TAS1C-3'D7[-]	904	5	0.171175	0.773806	no	NA	TAS1C-3'D7[-]:AT4G04460.2	0.972538
AT5G27930.2	TAS2-3'D4[-]	325	5	0.171175	0.773806	no	NA	TAS2-3'D4[-]:AT5G27930.2	0.972538
AT1G18540.1	TAS4-3'D8[+]	728	4.5	0.513525	0.524997	no	NA	TAS4-3'D8[+]:AT1G18540.1	0.984845
AT1G15940.1	TAS3C-5'D8[-]	1535	5.5	0.34235	0.886903	no	NA	TAS3C-5'D8[-]:AT1G15940.1	0.993398
AT1G08190.1	TAS1C-3'D7[+]	3202	4.5	0.513525	0.329409	no	ATVAM2	TAS1C-3'D7[+]:ATVAM2	0.993978
AT1G01350.1	TAS3C-5'D8[-]	905	6	0.0975697	0.799302	no	NA	TAS3C-5'D8[-]:AT1G01350.1	0.999994
AT1G02010.2	TAS3C-5'D8[-]	1139	5.5	0.513525	0.688523	no	SEC1A	TAS3C-5'D8[-]:SEC1A	0.999994
AT1G03080.1	TAS1A-3'D9[-]	5175	5.5	0.171175	0.773806	no	NET1D	TAS1A-3'D9[-]:NET1D	0.999994
AT1G04270.2	TAS1A-3'D5[+]	82	5	0.171175	0.0296393	no	RPS15	TAS1A-3'D5[+]:RPS15	0.999994
AT1G04770.1	TAS3A-5'D8[+]	931	5.5	0.34235	0.28166	no	NA	TAS3A-5'D8[+]:AT1G04770.1	0.999994
AT1G05230.4	TAS1C-3'D8[-]	1194	5.5	0.171175	0.167523	no	HDG2	TAS1C-3'D8[-]:HDG2	0.999994
AT1G05910.1	TAS4-3'D9[+]	766	5.5	0.171175	0.695184	no	NA	TAS4-3'D9[+]:AT1G05910.1	0.999994
AT1G06550.1	TAS3C-5'D10[+]	1260	6	0.171175	0.406246	no	NA	TAS3C-5'D10[+]:AT1G06550.1	0.999994
AT1G09010.1	TAS2-3'D8[-]	2315	6	0.171175	0.872481	no	NA	TAS2-3'D8[-]:AT1G09010.1	0.999994
AT1G09770.1	TAS3C-5'D7[+]	2133	5	0.513525	0.63878	no	ATCDC5	TAS3C-5'D7[+]:ATCDC5	0.999994
AT1G11280.4	TAS3C-5'D9[+]	1789	5	0.34235	0.723298	no	NA	TAS3C-5'D9[+]:AT1G11280.4	0.999994
AT1G11680.1	TAS3C-5'D2[+]	994	5.5	0.34235	0.566536	no	CYP51	TAS3C-5'D2[+]:CYP51	0.999994
AT1G11910.1	TAS4-3'D7[-]	1668	5	1.02705	0.339877	no	APA1	TAS4-3'D7[-]:APA1	0.999994
AT1G12080.2	TAS3C-5'D8[-]	300	6	5.30642	0.586264	no	NA	TAS3C-5'D8[-]:AT1G12080.2	0.999994
AT1G12470.1	TAS1A-3'D9[-]	1731	5.5	0.171175	0.872481	no	NA	TAS1A-3'D9[-]:AT1G12470.1	0.999994
AT1G14710.2	TAS3C-5'D8[-]	2242	6	0.171175	0.532783	no	NA	TAS3C-5'D8[-]:AT1G14710.2	0.999994
AT1G15270.1	TAS3B-5'D9[+]	207	6	0.171175	0.406246	no	NA	TAS3B-5'D9[+]:AT1G15270.1	0.999994
AT1G15660.1	TAS1A-3'D8[-]	1294	6	0.171175	0.695184	no	CENP-C	TAS1A-3'D8[-]:CENP-C	0.999994
AT1G16705.2	TAS2-3'D5[+]	344	6	0.171175	0.631064	no	NA	TAS2-3'D5[+]:AT1G16705.2	0.999994
AT1G17490.1	TAS1A-3'D5[+]	342	6	0.171175	0.0580606	no	NA	TAS1A-3'D5[+]:AT1G17490.1	0.999994
AT1G19430.1	TAS4-3'D9[+]	1006	6	0.171175	0.773806	no	NA	TAS4-3'D9[+]:AT1G19430.1	0.999994
AT1G20440.1	TAS3C-5'D3[+]	485	5.5	0.684699	0.831109	no	AtCOR47	TAS3C-5'D3[+]:AtCOR47	0.999994
AT1G21200.1	TAS3B-5'D5[+]	1318	5.5	1.02705	0.797872	no	NA	TAS3B-5'D5[+]:AT1G21200.1	0.999994
AT1G22030.1	TAS3C-5'D8[+]	1165	6	1.02705	0.922132	no	NA	TAS3C-5'D8[+]:AT1G22030.1	0.999994
AT1G22520.2	TAS3B-5'D9[+]	57	6	0.171175	0.695184	no	NA	TAS3B-5'D9[+]:AT1G22520.2	0.999994
AT1G22770.1	TAS1A-3'D8[+]	3624	5.5	0.171175	0.872481	no	FB	TAS1A-3'D8[+]:FB	0.999994
AT1G23360.3	TAS1A-3'D4[+]	586	5.5	1.88292	0.445061	no	MENG	TAS1A-3'D4[+]:MENG	0.999994
AT1G29700.1	TAS1A-3'D7[-]	1231	6	0.171175	0.695184	no	NA	TAS1A-3'D7[-]:AT1G29700.1	0.999994
AT1G31330.1	TAS3C-5'D1[+]	358	5	1.54057	0.00498916	no	PSAF	TAS3C-5'D1[+]:PSAF	0.999994
AT1G32130.2	TAS4-3'D2[-]	278	5	0.171175	0.695184	no	ATIWS1	TAS4-3'D2[-]:ATIWS1	0.999994
AT1G32700.2	TAS3A-5'D4[+]	1209	5	0.855874	0.474652	no	NA	TAS3A-5'D4[+]:AT1G32700.2	0.999994
AT1G33360.1	TAS3A-5'D7[-]	1582	6	0.171175	0.773806	no	NA	TAS3A-5'D7[-]:AT1G33360.1	0.999994
AT1G35420.2	TAS4-3'D9[+]	323	6	0.171175	0.773806	no	NA	TAS4-3'D9[+]:AT1G35420.2	0.999994
AT1G48210.2	TAS3C-5'D10[-]	858	6	0.171175	0.577773	no	NA	TAS3C-5'D10[-]:AT1G48210.2	0.999994
AT1G49620.1	TAS3C-5'D3[+]	428	6	0.171175	0.532783	no	ICK5	TAS3C-5'D3[+]:ICK5	0.999994
AT1G50920.1	TAS4-3'D2[-]	1957	5	0.34235	0.566536	no	NA	TAS4-3'D2[-]:AT1G50920.1	0.999994
AT1G54060.1	TAS3B-5'D7[+]	1148	5.5	0.513525	0.495572	no	ASIL1	TAS3B-5'D7[+]:ASIL1	0.999994
AT1G54380.1	TAS3B-5'D7[+]	324	5.5	0.171175	0.695184	no	NA	TAS3B-5'D7[+]:AT1G54380.1	0.999994
AT1G54770.1	TAS3B-5'D7[+]	656	6	2.7388	0.626887	no	NA	TAS3B-5'D7[+]:AT1G54770.1	0.999994
AT1G55480.1	TAS3B-5'D7[+]	379	6	0.171175	0.773806	no	ZKT	TAS3B-5'D7[+]:ZKT	0.999994
AT1G56110.1	TAS3C-5'D8[-]	1540	5	0.684699	0.472219	no	NOP56	TAS3C-5'D8[-]:NOP56	0.999994
AT1G59820.1	TAS4-3'D8[-]	3708	6	0.171175	0.431889	no	ALA3	TAS4-3'D8[-]:ALA3	0.999994
AT1G60650.2	TAS2-3'D5[+]	810	5	0.171175	0.695184	no	AtRZ-1b	TAS2-3'D5[+]:AtRZ-1b	0.999994
AT1G61680.2	TAS2-3'D5[-]	1305	6	0.34235	0.136758	no	ATTPS14	TAS2-3'D5[-]:ATTPS14	0.999994
AT1G62930.1	TAS3C-5'D3[+]	1233	5.5	0.0445055	0.778117	no	RPF3	TAS3C-5'D3[+]:RPF3	0.999994
AT1G63700.1	TAS3A-5'D2[-]	2735	6	0.171175	0.494292	no	EMB71	TAS3A-5'D2[-]:EMB71	0.999994
AT1G65960.2	TAS3B-5'D6[+]	1452	6	1.19822	0.129924	no	GAD2	TAS3B-5'D6[+]:GAD2	0.999994
AT1G66350.1	TAS1C-3'D7[-]	1591	5	0.855874	0.643748	no	RGL	TAS1C-3'D7[-]:RGL	0.999994
AT1G67490.2	TAS1C-3'D1[-]	2131	6	0.171175	0.773806	no	GCS1	TAS1C-3'D1[-]:GCS1	0.999994
AT1G67590.2	TAS3C-5'D3[+]	984	5.5	0.171175	0.383476	no	NA	TAS3C-5'D3[+]:AT1G67590.2	0.999994
AT1G68560.1	TAS1A-3'D7[+]	2201	5.5	0.34235	0.192008	no	ATXYL1	TAS1A-3'D7[+]:ATXYL1	0.999994
AT1G68590.2	TAS3A-5'D5[+]	192	5	0.171175	0.577773	no	PSRP3/1	TAS3A-5'D5[+]:PSRP3/1	0.999994
AT1G72260.1	TAS2-3'D3[+]	140	6	3.76585	0.156555	no	THI2.1	TAS2-3'D3[+]:THI2.1	0.999994
AT1G72440.1	TAS3C-5'D10[+]	2809	5.5	0.684699	0.663119	no	EDA25	TAS3C-5'D10[+]:EDA25	0.999994
AT1G73760.1	TAS4-3'D4[+]	1036	6	0.171175	0.872481	no	NA	TAS4-3'D4[+]:AT1G73760.1	0.999994
AT1G74250.1	TAS3B-5'D7[+]	789	6	0.171175	0.631064	no	NA	TAS3B-5'D7[+]:AT1G74250.1	0.999994
AT1G74470.1	TAS3B-5'D7[+]	560	5	1.54057	0.438566	no	NA	TAS3B-5'D7[+]:AT1G74470.1	0.999994
AT1G76250.1	TAS3B-5'D5[+]	1257	6	0.171175	0.631064	no	NA	TAS3B-5'D5[+]:AT1G76250.1	0.999994
AT1G77590.1	TAS2-3'D8[-]	1691	5.5	0.171175	0.872481	no	LACS9	TAS2-3'D8[-]:LACS9	0.999994
AT1G78660.3	TAS4-3'D6[-]	1094	5	0.171175	0.254899	no	ATGGH1	TAS4-3'D6[-]:ATGGH1	0.999994
AT1G78880.1	TAS3C-5'D3[-]	1995	4.5	0.513525	0.815532	no	NA	TAS3C-5'D3[-]:AT1G78880.1	0.999994
AT1G78882.1	TAS3C-5'D3[-]	1995	4.5	0.513525	0.815532	no	CPuORF56	TAS3C-5'D3[-]:CPuORF56	0.999994
AT2G01350.4	TAS1A-3'D7[-]	944	5	0.34235	0.343315	no	QPT	TAS1A-3'D7[-]:QPT	0.999994
AT2G04630.1	TAS3C-5'D3[+]	171	6	0.171175	0.577773	no	NRPB6B	TAS3C-5'D3[+]:NRPB6B	0.999994
AT2G07772.1	TAS3C-5'D3[+]	30	5.5	0.0855874	0.319463	no	NA	TAS3C-5'D3[+]:AT2G07772.1	0.999994
AT2G11910.2	TAS3C-5'D3[-]	669	4	0.171175	0.695184	no	NA	TAS3C-5'D3[-]:AT2G11910.2	0.999994
AT2G18020.1	TAS3C-5'D10[-]	425	6	1.54057	0.679515	no	EMB2296	TAS3C-5'D10[-]:EMB2296	0.999994
AT2G18050.2	TAS3C-5'D3[+]	502	6	0.171175	0.171728	no	HIS1-3	TAS3C-5'D3[+]:HIS1-3	0.999994
AT2G19480.3	TAS3A-5'D1[+]	1195	5.5	0.513525	0.815532	no	NAP1;2	TAS3A-5'D1[+]:NAP1;2	0.999994
AT2G20280.1	TAS3B-5'D1[+]	410	6	0.171175	0.773806	no	NA	TAS3B-5'D1[+]:AT2G20280.1	0.999994
AT2G20950.4	TAS3A-5'D6[-]	1833	5.5	0.171175	0.872481	no	NA	TAS3A-5'D6[-]:AT2G20950.4	0.999994
AT2G21385.4	TAS1B-3'D4[+]	826	5	0.171175	0.460989	no	NA	TAS1B-3'D4[+]:AT2G21385.4	0.999994
AT2G22080.1	TAS3B-5'D9[+]	441	5.5	3.4235	0.682893	no	NA	TAS3B-5'D9[+]:AT2G22080.1	0.999994
AT2G22420.1	TAS3A-5'D5[+]	945	6	0.855874	0.783267	no	NA	TAS3A-5'D5[+]:AT2G22420.1	0.999994
AT2G22430.1	TAS3C-5'D9[-]	1209	6	2.0541	0.618612	no	ATHB6	TAS3C-5'D9[-]:ATHB6	0.999994
AT2G22795.1	TAS3C-5'D3[+]	814	6	0.855874	0.844262	no	NA	TAS3C-5'D3[+]:AT2G22795.1	0.999994
AT2G24020.2	TAS1C-3'D1[-]	269	5	0.171175	0.773806	no	NA	TAS1C-3'D1[-]:AT2G24020.2	0.999994
AT2G25620.1	TAS3A-5'D4[-]	1499	5.5	0.171175	0.406246	no	AtDBP1	TAS3A-5'D4[-]:AtDBP1	0.999994
AT2G26490.1	TAS2-3'D2[-]	1540	6	0.171175	0.872481	no	NA	TAS2-3'D2[-]:AT2G26490.1	0.999994
AT2G28910.1	TAS3B-5'D7[+]	560	5.5	0.855874	0.419549	no	CXIP4	TAS3B-5'D7[+]:CXIP4	0.999994
AT2G28910.1	TAS3B-5'D7[+]	809	6	0.34235	0.528366	no	CXIP4	TAS3B-5'D7[+]:CXIP4	0.999994
AT2G29210.1	TAS3C-5'D9[+]	384	6	0.513525	0.898395	no	NA	TAS3C-5'D9[+]:AT2G29210.1	0.999994
AT2G29360.1	TAS3B-5'D7[+]	695	6	0.171175	0.872481	no	NA	TAS3B-5'D7[+]:AT2G29360.1	0.999994
AT2G30500.2	TAS1C-3'D5[-]	1354	6	0.513525	0.815532	no	NET4B	TAS1C-3'D5[-]:NET4B	0.999994
AT2G30500.2	TAS3C-5'D3[+]	1383	6	0.34235	0.796789	no	NET4B	TAS3C-5'D3[+]:NET4B	0.999994
AT2G30570.1	TAS3B-5'D7[+]	263	6	0.171175	0.494292	no	PSBW	TAS3B-5'D7[+]:PSBW	0.999994
AT2G32580.2	TAS3C-5'D2[+]	909	5	0.171175	0.695184	no	NA	TAS3C-5'D2[+]:AT2G32580.2	0.999994
AT2G33150.1	TAS3B-5'D7[-]	1589	5	0.34235	0.723298	no	KAT2	TAS3B-5'D7[-]:KAT2	0.999994
AT2G35030.1	TAS2-3'D3[+]	1397	6	0.171175	0.872481	no	NA	TAS2-3'D3[+]:AT2G35030.1	0.999994
AT2G35240.1	TAS1A-3'D9[+]	800	5.5	0.171175	0.773806	no	MORF6	TAS1A-3'D9[+]:MORF6	0.999994
AT2G35260.1	TAS3C-5'D3[+]	1038	6	0.684699	0.19358	no	NA	TAS3C-5'D3[+]:AT2G35260.1	0.999994
AT2G35350.1	TAS3C-5'D3[+]	2266	5.5	0.171175	0.773806	no	PLL1	TAS3C-5'D3[+]:PLL1	0.999994
AT2G35630.1	TAS2-3'D7[+]	6075	5	0.171175	0.494292	no	GEM1	TAS2-3'D7[+]:GEM1	0.999994
AT2G36160.1	TAS1B-3'D4[-]	536	5.5	0.855874	0.643748	no	NA	TAS1B-3'D4[-]:AT2G36160.1	0.999994
AT2G36420.1	TAS3A-5'D9[+]	1126	6	0.34235	0.610653	no	TRM27	TAS3A-5'D9[+]:TRM27	0.999994
AT2G36950.1	TAS3C-5'D3[+]	905	6	0.171175	0.872481	no	NA	TAS3C-5'D3[+]:AT2G36950.1	0.999994
AT2G39870.1	TAS3C-5'D5[-]	1564	5	0.34235	0.254263	no	NA	TAS3C-5'D5[-]:AT2G39870.1	0.999994
AT2G40590.1	TAS3A-5'D4[+]	59	6	0.171175	0.695184	no	NA	TAS3A-5'D4[+]:AT2G40590.1	0.999994
AT2G41450.2	TAS1B-3'D1[-]	1756	5.5	0.171175	0.773806	no	NA	TAS1B-3'D1[-]:AT2G41450.2	0.999994
AT2G44200.1	TAS3B-5'D5[+]	1138	5.5	1.02705	0.747506	no	NA	TAS3B-5'D5[+]:AT2G44200.1	0.999994
AT2G44820.2	TAS3B-5'D7[+]	392	5.5	0.171175	0.773806	no	NA	TAS3B-5'D7[+]:AT2G44820.2	0.999994
AT2G45000.1	TAS2-3'D7[+]	1918	6	0.171175	0.773806	no	EMB2766	TAS2-3'D7[+]:EMB2766	0.999994
AT2G45070.4	TAS3C-5'D8[-]	201	5.5	0.171175	0.695184	no	SEC61 BETA	TAS3C-5'D8[-]:SEC61 BETA	0.999994
AT3G01180.1	TAS3A-5'D6[+]	1765	5.5	0.34235	0.439524	no	AtSS2	TAS3A-5'D6[+]:AtSS2	0.999994
AT3G02400.1	TAS3C-5'D5[+]	1514	6	0.171175	0.773806	no	NA	TAS3C-5'D5[+]:AT3G02400.1	0.999994
AT3G04920.1	TAS3A-5'D8[+]	255	5	2.0541	0.447819	no	NA	TAS3A-5'D8[+]:AT3G04920.1	0.999994
AT3G06760.2	TAS3C-5'D8[-]	858	6	0.171175	0.872481	no	NA	TAS3C-5'D8[-]:AT3G06760.2	0.999994
AT3G08720.2	TAS4-3'D2[-]	1400	6	0.171175	0.631064	no	ATPK19	TAS4-3'D2[-]:ATPK19	0.999994
AT3G09070.1	TAS3A-5'D1[+]	1923	5.5	0.171175	0.773806	no	OPS	TAS3A-5'D1[+]:OPS	0.999994
AT3G09310.1	TAS3C-5'D3[+]	533	5.5	0.34235	0.796789	no	NA	TAS3C-5'D3[+]:AT3G09310.1	0.999994
AT3G09980.1	TAS1B-3'D9[-]	260	5.5	1.3694	0.77581	no	NA	TAS1B-3'D9[-]:AT3G09980.1	0.999994
AT3G11490.1	TAS3C-5'D8[-]	1102	6	0.171175	0.695184	no	NA	TAS3C-5'D8[-]:AT3G11490.1	0.999994
AT3G11510.1	TAS4-3'D9[+]	685	5.5	0.684699	0.253385	no	NA	TAS4-3'D9[+]:AT3G11510.1	0.999994
AT3G11910.2	TAS2-3'D3[+]	3297	6	0.171175	0.494292	no	AtUBP13	TAS2-3'D3[+]:AtUBP13	0.999994
AT3G13460.4	TAS1B-3'D5[-]	1090	5	0.34235	0.796789	no	ECT2	TAS1B-3'D5[-]:ECT2	0.999994
AT3G14230.3	TAS3C-5'D2[-]	1483	5	0.855874	0.436438	no	RAP2.2	TAS3C-5'D2[-]:RAP2.2	0.999994
AT3G16840.1	TAS2-3'D1[-]	388	6	1.02705	0.496686	no	NA	TAS2-3'D1[-]:AT3G16840.1	0.999994
AT3G17050.1	TAS1A-3'D8[-]	39	5.5	1.02705	0.542166	no	NA	TAS1A-3'D8[-]:AT3G17050.1	0.999994
AT3G18930.2	TAS4-3'D9[+]	1455	5.5	0.171175	0.773806	no	NA	TAS4-3'D9[+]:AT3G18930.2	0.999994
AT3G19450.1	TAS1A-3'D9[-]	1185	5.5	0.34235	0.796789	no	ATCAD4	TAS1A-3'D9[-]:ATCAD4	0.999994
AT3G20040.1	TAS3B-5'D3[+]	1554	6	0.171175	0.773806	no	ATHXK4	TAS3B-5'D3[+]:ATHXK4	0.999994
AT3G21480.1	TAS3C-5'D2[+]	1041	6	0.513525	0.524997	no	NA	TAS3C-5'D2[+]:AT3G21480.1	0.999994
AT3G22380.2	TAS3B-5'D7[+]	184	5.5	0.171175	0.695184	no	TIC	TAS3B-5'D7[+]:TIC	0.999994
AT3G22380.2	TAS3B-5'D9[+]	3611	6	0.171175	0.872481	no	TIC	TAS3B-5'D9[+]:TIC	0.999994
AT3G22630.1	TAS3A-5'D5[+]	64	6	0.171175	0.872481	no	PBD1	TAS3A-5'D5[+]:PBD1	0.999994
AT3G23450.1	TAS4-3'D2[-]	317	5.5	0.684699	0.229727	no	NA	TAS4-3'D2[-]:AT3G23450.1	0.999994
AT3G24080.2	TAS3C-5'D3[+]	388	5.5	0.171175	0.431889	no	NA	TAS3C-5'D3[+]:AT3G24080.2	0.999994
AT3G24100.1	TAS3C-5'D2[+]	156	6	0.171175	0.383476	no	NA	TAS3C-5'D2[+]:AT3G24100.1	0.999994
AT3G25230.2	TAS1B-3'D7[-]	577	6	0.171175	0.773806	no	ATFKBP62	TAS1B-3'D7[-]:ATFKBP62	0.999994
AT3G25882.1	TAS3C-5'D3[+]	104	6	0.171175	0.773806	no	NIMIN-2	TAS3C-5'D3[+]:NIMIN-2	0.999994
AT3G26950.1	TAS3C-5'D1[-]	156	6	0.171175	0.872481	no	NA	TAS3C-5'D1[-]:AT3G26950.1	0.999994
AT3G27470.2	TAS2-3'D10[+]	992	6	0.34235	0.723298	no	NA	TAS2-3'D10[+]:AT3G27470.2	0.999994
AT3G27820.1	TAS3C-5'D4[+]	1325	6	0.171175	0.872481	no	ATMDAR4	TAS3C-5'D4[+]:ATMDAR4	0.999994
AT3G29760.1	TAS3C-5'D8[-]	694	5.5	0.171175	0.406246	no	NA	TAS3C-5'D8[-]:AT3G29760.1	0.999994
AT3G49640.2	TAS3C-5'D9[+]	251	6	0.171175	0.773806	no	NA	TAS3C-5'D9[+]:AT3G49640.2	0.999994
AT3G49910.1	TAS1C-3'D6[+]	581	5	4.27937	0.261723	no	NA	TAS1C-3'D6[+]:AT3G49910.1	0.999994
AT3G50670.2	TAS4-3'D9[+]	1708	6	0.171175	0.631064	no	U1-70K	TAS4-3'D9[+]:U1-70K	0.999994
AT3G52300.2	TAS3B-5'D5[+]	377	6	0.171175	0.494292	no	ATPQ	TAS3B-5'D5[+]:ATPQ	0.999994
AT3G54010.2	TAS3C-5'D3[+]	1569	6	0.34235	0.886903	no	DEI1	TAS3C-5'D3[+]:DEI1	0.999994
AT3G54230.2	TAS3B-5'D7[+]	2423	6	0.171175	0.532783	no	SUA	TAS3B-5'D7[+]:SUA	0.999994
AT3G54390.1	TAS3C-5'D3[+]	909	6	0.171175	0.872481	no	NA	TAS3C-5'D3[+]:AT3G54390.1	0.999994
AT3G56360.1	TAS1B-3'D4[-]	361	5	0.171175	0.137274	no	NA	TAS1B-3'D4[-]:AT3G56360.1	0.999994
AT3G57180.1	TAS3A-5'D9[+]	599	6	0.855874	0.915554	no	BPG2	TAS3A-5'D9[+]:BPG2	0.999994
AT3G57750.2	TAS4-3'D9[+]	872	6	0.513525	0.595742	no	NA	TAS4-3'D9[+]:AT3G57750.2	0.999994
AT3G57950.1	TAS3A-5'D6[+]	530	6	0.171175	0.460989	no	NA	TAS3A-5'D6[+]:AT3G57950.1	0.999994
AT3G58030.4	TAS3C-5'D3[+]	1884	6	0.171175	0.872481	no	NA	TAS3C-5'D3[+]:AT3G58030.4	0.999994
AT3G58140.1	TAS2-3'D9[+]	1136	5.5	0.171175	0.872481	no	NA	TAS2-3'D9[+]:AT3G58140.1	0.999994
AT3G58220.2	TAS3B-5'D2[+]	538	6	0.171175	0.773806	no	NA	TAS3B-5'D2[+]:AT3G58220.2	0.999994
AT3G59940.1	TAS3A-5'D2[-]	1325	6	0.34235	0.416198	no	NA	TAS3A-5'D2[-]:AT3G59940.1	0.999994
AT3G60360.1	TAS3B-5'D7[+]	607	6	0.513525	0.595742	no	EDA14	TAS3B-5'D7[+]:EDA14	0.999994
AT3G63500.2	TAS3C-5'D3[+]	3409	5.5	0.171175	0.631064	no	TTA2	TAS3C-5'D3[+]:TTA2	0.999994
AT4G01460.1	TAS3B-5'D6[+]	1064	6	0.171175	0.773806	no	NA	TAS3B-5'D6[+]:AT4G01460.1	0.999994
AT4G01560.1	TAS3C-5'D3[+]	941	6	0.171175	0.695184	no	MEE49	TAS3C-5'D3[+]:MEE49	0.999994
AT4G03290.1	TAS3A-5'D1[+]	407	5	0.855874	0.389411	no	NA	TAS3A-5'D1[+]:AT4G03290.1	0.999994
AT4G04640.1	TAS4-3'D9[-]	1325	6	1.3694	0.557202	no	ATPC1	TAS4-3'D9[-]:ATPC1	0.999994
AT4G08220.1	TAS1A-3'D8[-]	410	5	0.171175	0.631064	no	NA	TAS1A-3'D8[-]:AT4G08220.1	0.999994
AT4G08810.1	TAS1C-3'D7[-]	1295	6	0.171175	0.695184	no	SUB1	TAS1C-3'D7[-]:SUB1	0.999994
AT4G11560.1	TAS3C-5'D3[+]	231	6	0.171175	0.773806	no	NA	TAS3C-5'D3[+]:AT4G11560.1	0.999994
AT4G11820.2	TAS3A-5'D3[-]	161	6	0.171175	0.577773	no	FKP1	TAS3A-5'D3[-]:FKP1	0.999994
AT4G11960.2	TAS3A-5'D8[-]	910	6	0.34235	0.528366	no	PGRL1B	TAS3A-5'D8[-]:PGRL1B	0.999994
AT4G13540.1	TAS3B-5'D7[+]	163	5.5	0.684699	0.450599	no	NA	TAS3B-5'D7[+]:AT4G13540.1	0.999994
AT4G13670.1	TAS1B-3'D4[-]	511	6	0.171175	0.773806	no	PTAC5	TAS1B-3'D4[-]:PTAC5	0.999994
AT4G14500.2	TAS3C-5'D4[+]	1366	5	0.34235	0.723298	no	NA	TAS3C-5'D4[+]:AT4G14500.2	0.999994
AT4G14990.1	TAS3A-5'D6[+]	2970	5	0.513525	0.269228	no	NA	TAS3A-5'D6[+]:AT4G14990.1	0.999994
AT4G15260.1	TAS3A-5'D4[+]	1272	6	0.34235	0.796789	no	NA	TAS3A-5'D4[+]:AT4G15260.1	0.999994
AT4G16141.1	TAS1B-3'D4[+]	153	5	0.855874	0.363313	no	NA	TAS1B-3'D4[+]:AT4G16141.1	0.999994
AT4G16430.1	TAS2-3'D2[+]	1104	5	0.171175	0.532783	no	NA	TAS2-3'D2[+]:AT4G16430.1	0.999994
AT4G17510.1	TAS4-3'D8[-]	661	6	0.0872992	0.645397	no	UCH3	TAS4-3'D8[-]:UCH3	0.999994
AT4G17615.2	TAS3A-5'D7[-]	741	6	0.171175	0.532783	no	ATCBL1	TAS3A-5'D7[-]:ATCBL1	0.999994
AT4G19865.1	TAS4-3'D7[-]	1248	5	0.513525	0.558136	no	NA	TAS4-3'D7[-]:AT4G19865.1	0.999994
AT4G21550.1	TAS3C-5'D3[+]	2083	6	0.171175	0.872481	no	VAL3	TAS3C-5'D3[+]:VAL3	0.999994
AT4G21660.2	TAS3B-5'D7[+]	1739	6	0.513525	0.277683	no	NA	TAS3B-5'D7[+]:AT4G21660.2	0.999994
AT4G22220.1	TAS3C-5'D3[+]	643	5.5	0.171175	0.344823	no	ATISU1	TAS3C-5'D3[+]:ATISU1	0.999994
AT4G25130.1	TAS1B-3'D3[+]	59	6	0.171175	0.631064	no	MSRA4	TAS1B-3'D3[+]:MSRA4	0.999994
AT4G25370.1	TAS3B-5'D10[+]	775	5	0.171175	0.773806	no	NA	TAS3B-5'D10[+]:AT4G25370.1	0.999994
AT4G25730.1	TAS3B-5'D7[+]	2386	6	0.34235	0.231723	no	NA	TAS3B-5'D7[+]:AT4G25730.1	0.999994
AT4G26190.1	TAS4-3'D3[+]	2024	5.5	0.34235	0.343315	no	NA	TAS4-3'D3[+]:AT4G26190.1	0.999994
AT4G26630.2	TAS3C-5'D3[+]	836	6	1.54057	0.280874	no	NA	TAS3C-5'D3[+]:AT4G26630.2	0.999994
AT4G27595.1	TAS3C-5'D6[+]	3369	6	0.171175	0.773806	no	NA	TAS3C-5'D6[+]:AT4G27595.1	0.999994
AT4G27900.2	TAS3C-5'D2[+]	877	6	0.171175	0.695184	no	NA	TAS3C-5'D2[+]:AT4G27900.2	0.999994
AT4G28260.2	TAS1A-3'D5[+]	378	5	0.171175	0.532783	no	NA	TAS1A-3'D5[+]:AT4G28260.2	0.999994
AT4G28750.1	TAS3A-5'D7[+]	329	6	0.0855874	0.644381	no	PSAE-1	TAS3A-5'D7[+]:PSAE-1	0.999994
AT4G29590.1	TAS1C-3'D8[-]	796	5	0.34235	0.0599346	no	NA	TAS1C-3'D8[-]:AT4G29590.1	0.999994
AT4G30440.1	TAS3B-5'D3[+]	1118	5.5	0.171175	0.695184	no	GAE1	TAS3B-5'D3[+]:GAE1	0.999994
AT4G32010.1	TAS1A-3'D3[-]	3246	5	0.171175	0.631064	no	HSI2-L1	TAS1A-3'D3[-]:HSI2-L1	0.999994
AT4G33790.1	TAS3C-5'D8[-]	1417	5.5	0.171175	0.532783	no	CER4	TAS3C-5'D8[-]:CER4	0.999994
AT4G33920.1	TAS3C-5'D3[+]	1160	6	0.171175	0.328279	no	NA	TAS3C-5'D3[+]:AT4G33920.1	0.999994
AT4G33920.1	TAS3A-5'D10[-]	1219	5.5	0.171175	0.872481	no	NA	TAS3A-5'D10[-]:AT4G33920.1	0.999994
AT4G34960.1	TAS2-3'D8[-]	876	6	0.171175	0.460989	no	NA	TAS2-3'D8[-]:AT4G34960.1	0.999994
AT4G36470.1	TAS3C-5'D6[+]	928	6	0.171175	0.460989	no	NA	TAS3C-5'D6[+]:AT4G36470.1	0.999994
AT4G36730.2	TAS2-3'D1[-]	1135	5	9.24344	0.06763	no	AtGBF1	TAS2-3'D1[-]:AtGBF1	0.999994
AT4G36810.1	TAS3C-5'D1[-]	1012	5	0.171175	0.695184	no	AtGGPPS11	TAS3C-5'D1[-]:AtGGPPS11	0.999994
AT4G38430.1	TAS1A-3'D9[-]	1755	5	0.171175	0.328279	no	ATROPGEF1	TAS1A-3'D9[-]:ATROPGEF1	0.999994
AT4G38630.1	TAS3B-5'D7[+]	1203	6	0.171175	0.872481	no	ATMCB1	TAS3B-5'D7[+]:ATMCB1	0.999994
AT4G39480.1	TAS3A-5'D4[-]	1539	6	0.34235	0.465622	no	CYP96A9	TAS3A-5'D4[-]:CYP96A9	0.999994
AT5G01820.1	TAS1A-3'D7[-]	1309	5.5	9.75697	0.767845	no	ATCIPK14	TAS1A-3'D7[-]:ATCIPK14	0.999994
AT5G01980.1	TAS4-3'D1[+]	772	5.5	0.171175	0.872481	no	NA	TAS4-3'D1[+]:AT5G01980.1	0.999994
AT5G04600.1	TAS3B-5'D9[+]	623	5.5	2.39645	0.154003	no	NA	TAS3B-5'D9[+]:AT5G04600.1	0.999994
AT5G04760.1	TAS1A-3'D4[-]	521	6	0.171175	0.773806	no	NA	TAS1A-3'D4[-]:AT5G04760.1	0.999994
AT5G05250.1	TAS1B-3'D9[-]	596	6	0.171175	0.631064	no	NA	TAS1B-3'D9[-]:AT5G05250.1	0.999994
AT5G05690.3	TAS4-3'D9[+]	702	5.5	0.171175	0.872481	no	CBB3	TAS4-3'D9[+]:CBB3	0.999994
AT5G06160.1	TAS1A-3'D9[-]	915	5.5	0.171175	0.872481	no	ATO	TAS1A-3'D9[-]:ATO	0.999994
AT5G06980.4	TAS3C-5'D3[+]	177	5	0.684699	0.711023	no	NA	TAS3C-5'D3[+]:AT5G06980.4	0.999994
AT5G07530.2	TAS3B-5'D6[+]	635	5.5	0.684699	0.197464	no	ATGRP-7	TAS3B-5'D6[+]:ATGRP-7	0.999994
AT5G09670.2	TAS1C-3'D6[-]	1386	5	0.171175	0.773806	no	NA	TAS1C-3'D6[-]:AT5G09670.2	0.999994
AT5G09672.1	TAS1C-3'D6[-]	1386	5	0.171175	0.773806	no	CPuORF21	TAS1C-3'D6[-]:CPuORF21	0.999994
AT5G09810.1	TAS1C-3'D5[+]	1319	5.5	0.171175	0.143012	no	ACT7	TAS1C-3'D5[+]:ACT7	0.999994
AT5G10860.1	TAS3C-5'D7[-]	800	5.5	0.171175	0.872481	no	CBSX3	TAS3C-5'D7[-]:CBSX3	0.999994
AT5G10940.2	TAS1B-3'D10[+]	2021	6	0.171175	0.577773	no	ASG2	TAS1B-3'D10[+]:ASG2	0.999994
AT5G11230.1	TAS3C-5'D3[+]	959	6	0.171175	0.872481	no	NA	TAS3C-5'D3[+]:AT5G11230.1	0.999994
AT5G13020.1	TAS3A-5'D1[+]	1359	5	0.171175	0.494292	no	AtEML3	TAS3A-5'D1[+]:AtEML3	0.999994
AT5G13460.1	TAS4-3'D9[+]	985	5.5	0.171175	0.631064	no	IQD11	TAS4-3'D9[+]:IQD11	0.999994
AT5G14920.2	TAS2-3'D8[+]	1075	4.5	1.19822	0.0738714	no	NA	TAS2-3'D8[+]:AT5G14920.2	0.999994
AT5G16510.2	TAS2-3'D7[+]	977	5.5	0.171175	0.773806	no	RGP5	TAS2-3'D7[+]:RGP5	0.999994
AT5G16620.1	TAS3C-5'D1[+]	1242	5.5	0.171175	0.872481	no	ATTIC40	TAS3C-5'D1[+]:ATTIC40	0.999994
AT5G16780.1	TAS3B-5'D9[+]	602	5	0.684699	0.182794	no	DOT2	TAS3B-5'D9[+]:DOT2	0.999994
AT5G17900.1	TAS3C-5'D8[-]	838	6	0.34235	0.796789	no	NA	TAS3C-5'D8[-]:AT5G17900.1	0.999994
AT5G18610.2	TAS4-3'D1[+]	1791	5	0.171175	0.532783	no	NA	TAS4-3'D1[+]:AT5G18610.2	0.999994
AT5G20220.2	TAS2-3'D2[-]	1327	6	0.171175	0.695184	no	NA	TAS2-3'D2[-]:AT5G20220.2	0.999994
AT5G22000.3	TAS1A-3'D7[-]	1391	6	0.513525	0.746664	no	RHF2A	TAS1A-3'D7[-]:RHF2A	0.999994
AT5G22310.1	TAS3C-5'D3[+]	1187	6	0.513525	0.898395	no	NA	TAS3C-5'D3[+]:AT5G22310.1	0.999994
AT5G22580.1	TAS3C-5'D3[+]	170	6	0.171175	0.773806	no	NA	TAS3C-5'D3[+]:AT5G22580.1	0.999994
AT5G26000.2	TAS3C-5'D2[+]	823	5.5	1.02705	0.242455	no	AtTGG1	TAS3C-5'D2[+]:AtTGG1	0.999994
AT5G26742.3	TAS3B-5'D8[+]	1802	5.5	0.34235	0.796789	no	AtRH3	TAS3B-5'D8[+]:AtRH3	0.999994
AT5G28030.2	TAS3A-5'D2[-]	973	6	0.171175	0.872481	no	DES1	TAS3A-5'D2[-]:DES1	0.999994
AT5G28540.1	TAS1B-3'D4[-]	1747	5	0.171175	0.310548	no	BIP1	TAS1B-3'D4[-]:BIP1	0.999994
AT5G30495.2	TAS3B-5'D7[+]	589	5.5	0.34235	0.796789	no	NA	TAS3B-5'D7[+]:AT5G30495.2	0.999994
AT5G37130.1	TAS1A-3'D9[-]	2607	5.5	0.171175	0.773806	no	NA	TAS1A-3'D9[-]:AT5G37130.1	0.999994
AT5G37540.1	TAS3C-5'D4[-]	1395	6	0.171175	0.577773	no	NA	TAS3C-5'D4[-]:AT5G37540.1	0.999994
AT5G41790.1	TAS3A-5'D9[+]	680	5.5	0.171175	0.872481	no	CIP1	TAS3A-5'D9[+]:CIP1	0.999994
AT5G42440.1	TAS1A-3'D8[-]	1013	5.5	0.171175	0.872481	no	NA	TAS1A-3'D8[-]:AT5G42440.1	0.999994
AT5G42950.1	TAS3B-5'D9[+]	5046	6	0.171175	0.773806	no	NA	TAS3B-5'D9[+]:AT5G42950.1	0.999994
AT5G43130.2	TAS3C-5'D8[-]	1609	6	0.684699	0.472219	no	TAF4	TAS3C-5'D8[-]:TAF4	0.999994
AT5G43850.1	TAS3B-5'D5[+]	136	5.5	0.0872992	0.645397	no	ARD4	TAS3B-5'D5[+]:ARD4	0.999994
AT5G45520.1	TAS3B-5'D8[+]	1720	6	0.513525	0.342156	no	NA	TAS3B-5'D8[+]:AT5G45520.1	0.999994
AT5G47100.1	TAS1A-3'D7[+]	891	5.5	0.171175	0.872481	no	ATCBL9	TAS1A-3'D7[+]:ATCBL9	0.999994
AT5G47520.1	TAS1C-3'D5[-]	823	6	0.34235	0.796789	no	AtRABA5a	TAS1C-3'D5[-]:AtRABA5a	0.999994
AT5G48180.1	TAS1B-3'D7[-]	657	5.5	1.02705	0.747506	no	AtNSP5	TAS1B-3'D7[-]:AtNSP5	0.999994
AT5G49910.1	TAS3B-5'D7[+]	1853	5.5	0.171175	0.773806	no	cpHsc70-2	TAS3B-5'D7[+]:cpHsc70-2	0.999994
AT5G51750.1	TAS2-3'D5[-]	928	5	0.171175	0.773806	no	ATSBT1.3	TAS2-3'D5[-]:ATSBT1.3	0.999994
AT5G51940.1	TAS3C-5'D3[+]	189	6	0.171175	0.773806	no	NRPB6A	TAS3C-5'D3[+]:NRPB6A	0.999994
AT5G52040.4	TAS3C-5'D3[+]	1445	6	0.684699	0.907766	no	At-RS41	TAS3C-5'D3[+]:At-RS41	0.999994
AT5G52920.1	TAS4-3'D1[-]	1531	6	0.171175	0.773806	no	PKP-BETA1	TAS4-3'D1[-]:PKP-BETA1	0.999994
AT5G52920.1	TAS3C-5'D4[+]	629	6	0.171175	0.431889	no	PKP-BETA1	TAS3C-5'D4[+]:PKP-BETA1	0.999994
AT5G57710.1	TAS3B-5'D7[+]	3022	6	0.855874	0.844262	no	NA	TAS3B-5'D7[+]:AT5G57710.1	0.999994
AT5G57950.1	TAS3C-5'D3[+]	49	6	0.171175	0.872481	no	NA	TAS3C-5'D3[+]:AT5G57950.1	0.999994
AT5G60030.1	TAS3B-5'D7[+]	729	5.5	0.34235	0.610653	no	NA	TAS3B-5'D7[+]:AT5G60030.1	0.999994
AT5G60548.1	TAS4-3'D10[-]	612	6	0.171175	0.695184	no	CPuORF62	TAS4-3'D10[-]:CPuORF62	0.999994
AT5G60550.1	TAS4-3'D10[-]	612	6	0.171175	0.695184	no	ATSNAK1	TAS4-3'D10[-]:ATSNAK1	0.999994
AT5G61480.1	TAS1A-3'D8[-]	3076	5.5	0.684699	0.430873	no	PXY	TAS1A-3'D8[-]:PXY	0.999994
AT5G61920.2	TAS3B-5'D1[+]	779	6	0.171175	0.773806	no	NA	TAS3B-5'D1[+]:AT5G61920.2	0.999994
AT5G62000.4	TAS1B-3'D10[+]	3081	5	4.62172	0.531063	no	ARF1-BP	TAS1B-3'D10[+]:ARF1-BP	0.999994
AT5G63810.1	TAS1A-3'D7[-]	2150	6	0.34235	0.886903	no	AtBGAL10	TAS1A-3'D7[-]:AtBGAL10	0.999994
AT5G63870.3	TAS1C-3'D5[-]	947	5.5	0.34235	0.796789	no	ATPP7	TAS1C-3'D5[-]:ATPP7	0.999994
AT5G65390.1	TAS1A-3'D2[+]	449	6	0.171175	0.532783	no	AGP7	TAS1A-3'D2[+]:AGP7	0.999994
AT5G65750.1	TAS2-3'D4[-]	998	6	0.171175	0.872481	no	NA	TAS2-3'D4[-]:AT5G65750.1	0.999994
AT5G66460.1	TAS3A-5'D5[+]	1252	5.5	0.171175	0.695184	no	AtMAN7	TAS3A-5'D5[+]:AtMAN7	0.999994
AT5G66760.1	TAS1C-3'D5[-]	1777	6	0.171175	0.313249	no	SDH1-1	TAS1C-3'D5[-]:SDH1-1	0.999994
AT5G67250.1	TAS1A-3'D7[-]	47	6	0.171175	0.872481	no	SKIP2	TAS1A-3'D7[-]:SKIP2	0.999994
ATCG01130.1	TAS3C-5'D4[+]	4586	6	0.684699	0.430873	no	YCF1.2	TAS3C-5'D4[+]:YCF1.2	0.999994

## Sheet: SRX283760
Target transcript	tasiRNA	tasiRNA slice site position in target transcript	Allen score of sRNA:target duplex	Slice site RPM	Slice site RPM + 1/Maximum adjacent site RPM + 1	Previously verified by 5' RACE?	Target gene common name	Interaction name	P-value adjusted for multiple testing
AT1G63070.1	TAS2-3'D6[-]	518	0.5	0.128899	1.1289	no	NA	TAS2-3'D6[-]:AT1G63070.1	0
AT1G63130.1	TAS2-3'D6[-]	660	0.5	0.656837	1.22138	no	TAS8	TAS2-3'D6[-]:TAS8	0
AT2G33860.1	TAS3A-5'D8[+]	1804	1	0.678778	1.16567	yes	ARF3	TAS3A-5'D8[+]:ARF3	0
AT5G60450.1	TAS3A-5'D8[+]	1884	1	0.137127	0.997594	yes	ARF4	TAS3A-5'D8[+]:ARF4	0
AT2G33860.1	TAS3C-5'D5[+]	1685	1.5	1.11484	1.50427	yes	ARF3	TAS3C-5'D5[+]:ARF3	0.00136394
AT5G18040.1	TAS1A-3'D2[+]	685	2	1.58381	1.97045	yes	NA	TAS1A-3'D2[+]:AT5G18040.1	0.00272026
AT5G62000.4	TAS3A-5'D7[+]	1745	1.5	0.526567	1.31707	yes	ARF1-BP	TAS3A-5'D7[+]:ARF1-BP	0.00443536
AT4G29760.1	TAS1A-3'D6[+]	630	3	2.53822	3.07814	no	NA	TAS1A-3'D6[+]:AT4G29760.1	0.00849819
AT5G18065.1	TAS1A-3'D2[+]	736	2	0.527938	1.33244	no	NA	TAS1A-3'D2[+]:AT5G18065.1	0.00950619
AT4G29770.2	TAS1A-3'D6[+]	780	3	0.703461	1.70346	yes	NA	TAS1A-3'D6[+]:AT4G29770.2	0.029664
AT5G20240.1	TAS3A-5'D4[+]	146	5	8.11516	2.69092	no	PI	TAS3A-5'D4[+]:PI	0.0491435
AT3G25840.2	TAS3C-5'D3[+]	378	6	7.66676	3.79765	no	NA	TAS3C-5'D3[+]:AT3G25840.2	0.100422
AT3G03140.1	TAS1A-3'D7[-]	1720	2.5	0.126157	0.87999	no	NA	TAS1A-3'D7[-]:AT3G03140.1	0.462813
AT4G24040.1	TAS2-3'D8[-]	1560	5	1.17243	1.57754	no	ATTRE1	TAS2-3'D8[-]:ATTRE1	0.484654
AT3G50370.1	TAS1A-3'D7[-]	2230	3.5	0.1193	1.1193	no	NA	TAS1A-3'D7[-]:AT3G50370.1	0.516854
AT3G53540.1	TAS3B-5'D6[+]	1792	4	0.152211	1.15221	no	TRM19	TAS3B-5'D6[+]:TRM19	0.516854
AT1G51670.1	TAS1A-3'D6[+]	536	3.5	0.178265	1.0214	no	NA	TAS1A-3'D6[+]:AT1G51670.1	0.539374
AT2G25840.3	TAS3B-5'D7[+]	1261	4	0.253685	1.09589	no	OVA4	TAS3B-5'D7[+]:OVA4	0.539374
AT5G27120.1	TAS3B-5'D7[+]	1630	3.5	0.145354	1.00602	no	NA	TAS3B-5'D7[+]:AT5G27120.1	0.539374
AT2G44710.1	TAS4-3'D4[+]	645	4	0.138498	1.1385	no	NA	TAS4-3'D4[+]:AT2G44710.1	0.585011
AT2G36270.1	TAS3B-5'D7[+]	1206	4.5	0.65958	1.16791	no	ABI5	TAS3B-5'D7[+]:ABI5	0.670025
AT3G02770.1	TAS2-3'D9[-]	342	4.5	0.44292	1.21612	no	NA	TAS2-3'D9[-]:AT3G02770.1	0.670025
AT2G35350.1	TAS3C-5'D3[+]	2266	5.5	0.700718	1.2849	no	PLL1	TAS3C-5'D3[+]:PLL1	0.773017
AT1G11900.1	TAS3B-5'D1[+]	662	3.5	0.142612	0.989315	no	NA	TAS3B-5'D1[+]:AT1G11900.1	0.775935
AT5G05210.2	TAS3B-5'D9[+]	1149	4	0.231744	1.08978	no	NA	TAS3B-5'D9[+]:AT5G05210.2	0.790606
AT1G59540.2	TAS3C-5'D4[+]	911	5	0.139869	1.13987	no	ZCF125	TAS3C-5'D4[+]:ZCF125	0.804506
AT1G63740.1	TAS3C-5'D7[-]	2652	5	0.150839	1.15084	no	NA	TAS3C-5'D7[-]:AT1G63740.1	0.804506
AT3G18390.1	TAS3C-5'D1[+]	1582	3	0.237229	0.688084	no	EMB1865	TAS3C-5'D1[+]:EMB1865	0.804506
AT4G38550.1	TAS4-3'D6[-]	2031	3.5	0.153582	1.00358	no	NA	TAS4-3'D6[-]:AT4G38550.1	0.804506
AT5G47445.1	TAS1C-3'D5[-]	1279	4.5	0.267397	1.11726	no	NA	TAS1C-3'D5[-]:AT5G47445.1	0.804506
AT3G50960.1	TAS2-3'D6[+]	454	3.5	0.148097	1.01701	no	PLP3a	TAS2-3'D6[+]:PLP3a	0.814683
AT4G31340.2	TAS3C-5'D4[-]	1692	2	0.260541	1.01997	no	NA	TAS3C-5'D4[-]:AT4G31340.2	0.814683
AT1G26940.1	TAS3C-5'D4[+]	270	6	0.438806	1.24725	no	NA	TAS3C-5'D4[+]:AT1G26940.1	0.835416
AT2G26190.1	TAS3B-5'D9[-]	1893	5	0.368871	1.17683	no	NA	TAS3B-5'D9[-]:AT2G26190.1	0.835416
AT4G23810.1	TAS3B-5'D9[+]	689	5.5	0.330476	1.16024	no	ATWRKY53	TAS3B-5'D9[+]:ATWRKY53	0.835416
AT5G14440.2	TAS3C-5'D8[-]	569	5.5	0.566334	1.24259	no	NA	TAS3C-5'D8[-]:AT5G14440.2	0.837934
AT3G19240.1	TAS4-3'D3[+]	1193	3	0.244086	0.751502	no	NA	TAS4-3'D3[+]:AT3G19240.1	0.84014
AT1G10950.1	TAS2-3'D4[+]	2156	4.5	0.138498	1.1385	no	AtTMN1	TAS2-3'D4[+]:AtTMN1	0.864788
AT1G23640.1	TAS1A-3'D3[-]	1239	4	0.390811	1.01807	no	NA	TAS1A-3'D3[-]:AT1G23640.1	0.864788
AT1G69210.2	TAS3B-5'D7[+]	822	5	0.146726	1.14673	no	NA	TAS3B-5'D7[+]:AT1G69210.2	0.864788
AT1G71440.1	TAS3B-5'D5[+]	1289	4.5	0.27014	1.10235	no	PFI	TAS3B-5'D5[+]:PFI	0.864788
AT3G06760.2	TAS3B-5'D7[+]	861	4	0.159067	1.00715	no	NA	TAS3B-5'D7[+]:AT3G06760.2	0.864788
AT3G17930.1	TAS3A-5'D5[+]	684	4	0.137127	0.998796	no	DAC	TAS3A-5'D5[+]:DAC	0.864788
AT3G55750.1	TAS3C-5'D9[-]	22	6	1.04354	1.3081	no	NA	TAS3C-5'D9[-]:AT3G55750.1	0.864788
AT5G61150.2	TAS3A-5'D8[+]	1407	4	0.137127	0.992817	no	VIP4	TAS3A-5'D8[+]:VIP4	0.885271
AT1G15690.2	TAS4-3'D4[-]	1074	4	0.29208	0.993672	no	AtAVP1	TAS4-3'D4[-]:AtAVP1	0.888963
AT1G21240.1	TAS3C-5'D5[+]	1272	6	0.17278	1.17278	no	WAK3	TAS3C-5'D5[+]:WAK3	0.888963
AT1G71710.2	TAS3B-5'D7[+]	1826	3.5	0.164552	0.845656	no	NA	TAS3B-5'D7[+]:AT1G71710.2	0.888963
AT5G66450.2	TAS3B-5'D7[-]	612	4.5	0.135756	1.13576	no	LPPepsilon2	TAS3B-5'D7[-]:LPPepsilon2	0.888963
AT2G47620.1	TAS3C-5'D3[+]	1023	4.5	0.160438	0.996467	no	ATSWI3A	TAS3C-5'D3[+]:ATSWI3A	0.899099
AT4G02510.1	TAS3C-5'D2[+]	2768	3.5	0.305793	0.797363	no	ATTOC159	TAS3C-5'D2[+]:ATTOC159	0.900698
AT5G08590.1	TAS1C-3'D6[-]	899	3.5	0.146726	0.820457	no	ASK2	TAS1C-3'D6[-]:ASK2	0.900698
AT1G04870.2	TAS1A-3'D2[-]	721	4	0.149468	0.910894	no	ATPRMT10	TAS1A-3'D2[-]:ATPRMT10	0.92685
AT1G06960.3	TAS3B-5'D10[+]	778	5	0.253685	1.08937	no	NA	TAS3B-5'D10[+]:AT1G06960.3	0.92685
AT1G07280.3	TAS3B-5'D6[+]	627	5	0.200205	1.0593	no	NA	TAS3B-5'D6[+]:AT1G07280.3	0.92685
AT1G48180.1	TAS1A-3'D6[+]	513	6	0.175522	1.17552	no	NA	TAS1A-3'D6[+]:AT1G48180.1	0.92685
AT2G22080.1	TAS3B-5'D9[+]	441	5.5	3.62975	1.0961	no	NA	TAS3B-5'D9[+]:AT2G22080.1	0.92685
AT5G26340.1	TAS1A-3'D9[-]	1541	4.5	0.148097	0.990535	no	ATSTP13	TAS1A-3'D9[-]:ATSTP13	0.92685
AT5G48120.1	TAS3A-5'D10[-]	3184	4	0.268769	0.983002	no	MET18	TAS3A-5'D10[-]:MET18	0.92685
AT1G16490.1	TAS1C-3'D5[+]	604	4.5	0.127528	1.12753	no	ATMYB58	TAS1C-3'D5[+]:ATMYB58	0.929381
AT1G48175.1	TAS1C-3'D1[-]	21	5	0.139869	1.13987	no	emb2191	TAS1C-3'D1[-]:emb2191	0.929381
AT1G48350.1	TAS2-3'D1[-]	336	4	0.131642	0.989212	no	EMB3105	TAS2-3'D1[-]:EMB3105	0.929381
AT1G72040.1	TAS3B-5'D9[+]	1365	6	0.175522	1.17552	no	AtdNK	TAS3B-5'D9[+]:AtdNK	0.929381
AT2G16890.2	TAS1A-3'D7[-]	1087	4.5	0.505998	1.0497	no	NA	TAS1A-3'D7[-]:AT2G16890.2	0.929381
AT2G40650.1	TAS3C-5'D3[+]	1134	4	0.117929	0.971403	no	NA	TAS3C-5'D3[+]:AT2G40650.1	0.929381
AT3G26932.2	TAS3C-5'D8[-]	912	4	0.127528	0.954717	no	DRB3	TAS3C-5'D8[-]:DRB3	0.929381
AT4G17810.1	TAS2-3'D6[+]	436	4.5	0.123414	1.12341	no	NA	TAS2-3'D6[+]:AT4G17810.1	0.945678
AT1G15390.1	TAS3C-5'D3[+]	248	5.5	0.133013	1.13301	no	ATDEF1	TAS3C-5'D3[+]:ATDEF1	0.967992
AT1G73100.1	TAS1A-3'D9[-]	536	6	0.153582	1.15358	no	SDG19	TAS1A-3'D9[-]:SDG19	0.967992
AT1G74900.1	TAS1C-3'D10[-]	581	4	0.112444	0.968946	no	OTP43	TAS1C-3'D10[-]:OTP43	0.967992
AT4G26570.2	TAS4-3'D8[+]	473	6	0.149468	1.14947	no	ATCBL3	TAS4-3'D8[+]:ATCBL3	0.967992
AT4G30150.1	TAS1B-3'D7[-]	1032	6	0.153582	1.15358	no	NA	TAS1B-3'D7[-]:AT4G30150.1	0.970372
AT3G16180.1	TAS4-3'D9[+]	1888	5	0.401782	1.0849	no	NA	TAS4-3'D9[+]:AT3G16180.1	0.985305
AT1G02010.2	TAS3C-5'D8[-]	1139	5.5	0.316763	0.700274	no	SEC1A	TAS3C-5'D8[-]:SEC1A	0.999995
AT1G02500.2	TAS3B-5'D7[-]	1326	6	0.287966	0.572977	no	AtSAM1	TAS3B-5'D7[-]:AtSAM1	0.999995
AT1G02720.2	TAS1C-3'D4[-]	1390	6	0.255056	0.995649	no	GATL5	TAS1C-3'D4[-]:GATL5	0.999995
AT1G03080.1	TAS1A-3'D9[-]	5175	5.5	0.29208	0.86584	no	NET1D	TAS1A-3'D9[-]:NET1D	0.999995
AT1G03520.2	TAS3A-5'D4[-]	628	5	0.146726	0.827766	no	NA	TAS3A-5'D4[-]:AT1G03520.2	0.999995
AT1G03560.1	TAS1A-3'D9[+]	1302	6	0.128899	0.873707	no	NA	TAS1A-3'D9[+]:AT1G03560.1	0.999995
AT1G04240.1	TAS3C-5'D3[-]	205	6	0.123414	0.873168	no	IAA3	TAS3C-5'D3[-]:IAA3	0.999995
AT1G04270.2	TAS1A-3'D5[+]	82	5	1.29722	0.0656107	no	RPS15	TAS1A-3'D5[+]:RPS15	0.999995
AT1G04770.1	TAS3A-5'D8[+]	931	5.5	0.374356	0.201853	no	NA	TAS3A-5'D8[+]:AT1G04770.1	0.999995
AT1G04780.1	TAS3C-5'D3[+]	2556	5	0.149468	0.79361	no	NA	TAS3C-5'D3[+]:AT1G04780.1	0.999995
AT1G05410.2	TAS1C-3'D10[+]	1315	6	0.128899	0.874635	no	NA	TAS1C-3'D10[+]:AT1G05410.2	0.999995
AT1G06420.2	TAS3C-5'D3[+]	190	4	0.305793	0.538527	no	NA	TAS3C-5'D3[+]:AT1G06420.2	0.999995
AT1G06550.1	TAS3C-5'D10[+]	1260	6	0.261912	0.536824	no	NA	TAS3C-5'D10[+]:AT1G06550.1	0.999995
AT1G07320.4	TAS1B-3'D4[-]	853	6	0.296194	0.80225	no	EMB2784	TAS1B-3'D4[-]:EMB2784	0.999995
AT1G07840.3	TAS3B-5'D7[+]	914	6	0.141241	0.814136	no	NA	TAS3B-5'D7[+]:AT1G07840.3	0.999995
AT1G08110.4	TAS3B-5'D5[+]	663	5	0.146726	0.777727	no	NA	TAS3B-5'D5[+]:AT1G08110.4	0.999995
AT1G08190.1	TAS1C-3'D7[+]	3202	4.5	0.145354	0.374343	no	ATVAM2	TAS1C-3'D7[+]:ATVAM2	0.999995
AT1G08510.1	TAS3B-5'D7[+]	1537	4.5	0.128899	0.716961	no	FATB	TAS3B-5'D7[+]:FATB	0.999995
AT1G08640.1	TAS3A-5'D5[-]	941	4.5	0.137127	0.744892	no	CJD1	TAS3A-5'D5[-]:CJD1	0.999995
AT1G09770.1	TAS3C-5'D7[+]	2133	5	0.474459	0.592998	no	ATCDC5	TAS3C-5'D7[+]:ATCDC5	0.999995
AT1G10850.1	TAS3B-5'D7[+]	1367	5	0.271511	0.808237	no	NA	TAS3B-5'D7[+]:AT1G10850.1	0.999995
AT1G10940.2	TAS1C-3'D5[-]	460	6	0.377099	0.952573	no	ASK1	TAS1C-3'D5[-]:ASK1	0.999995
AT1G11280.4	TAS3C-5'D9[+]	1789	5	0.644496	0.746616	no	NA	TAS3C-5'D9[+]:AT1G11280.4	0.999995
AT1G11750.2	TAS3A-5'D4[-]	167	6	0.120672	0.895862	no	CLPP6	TAS3A-5'D4[-]:CLPP6	0.999995
AT1G11910.1	TAS4-3'D7[-]	1668	5	1.32876	0.479427	no	APA1	TAS4-3'D7[-]:APA1	0.999995
AT1G12080.2	TAS3C-5'D8[-]	300	6	4.20568	0.701937	no	NA	TAS3C-5'D8[-]:AT1G12080.2	0.999995
AT1G12270.1	TAS3B-5'D9[+]	1573	6	0.0795335	0.543588	no	Hop1	TAS3B-5'D9[+]:Hop1	0.999995
AT1G12430.2	TAS1A-3'D3[-]	1957	5	0.418237	0.676756	no	ARK3	TAS1A-3'D3[-]:ARK3	0.999995
AT1G12470.1	TAS1A-3'D9[-]	1731	5.5	0.146726	0.796998	no	NA	TAS1A-3'D9[-]:AT1G12470.1	0.999995
AT1G12620.1	TAS1C-3'D10[-]	1514	5.5	0.138498	0.843536	no	NA	TAS1C-3'D10[-]:AT1G12620.1	0.999995
AT1G14710.2	TAS3C-5'D8[-]	2242	6	0.397668	0.801771	no	NA	TAS3C-5'D8[-]:AT1G14710.2	0.999995
AT1G14740.1	TAS3B-5'D7[+]	2063	5.5	0.113815	0.951949	no	TTA1	TAS3B-5'D7[+]:TTA1	0.999995
AT1G15230.1	TAS1A-3'D9[-]	299	6	0.407267	1.10916	no	NA	TAS1A-3'D9[-]:AT1G15230.1	0.999995
AT1G15270.1	TAS3B-5'D9[+]	207	6	0.500513	0.487797	no	NA	TAS3B-5'D9[+]:AT1G15270.1	0.999995
AT1G15530.1	TAS1A-3'D7[-]	1699	6	0.126157	0.823515	no	NA	TAS1A-3'D7[-]:AT1G15530.1	0.999995
AT1G15910.1	TAS3A-5'D7[+]	240	6	0.126157	0.858824	no	FDM1	TAS3A-5'D7[+]:FDM1	0.999995
AT1G15940.1	TAS3C-5'D8[-]	1535	5.5	0.349673	0.972339	no	NA	TAS3C-5'D8[-]:AT1G15940.1	0.999995
AT1G16705.2	TAS2-3'D5[+]	344	6	0.390811	0.895783	no	NA	TAS2-3'D5[+]:AT1G16705.2	0.999995
AT1G17210.1	TAS3A-5'D2[-]	2836	4.5	0.123414	0.870385	no	ATILP1	TAS3A-5'D2[-]:ATILP1	0.999995
AT1G17490.1	TAS1A-3'D5[+]	342	6	0.152211	0.06649	no	NA	TAS1A-3'D5[+]:AT1G17490.1	0.999995
AT1G18370.1	TAS3B-5'D5[+]	2177	5.5	0.153582	1.01081	no	ATNACK1	TAS3B-5'D5[+]:ATNACK1	0.999995
AT1G18540.1	TAS4-3'D8[+]	728	4.5	1.14501	0.795146	no	NA	TAS4-3'D8[+]:AT1G18540.1	0.999995
AT1G18740.1	TAS1B-3'D4[-]	1141	4.5	0.116558	0.790343	no	NA	TAS1B-3'D4[-]:AT1G18740.1	0.999995
AT1G20440.1	TAS3C-5'D3[+]	485	5.5	0.722658	0.747655	no	AtCOR47	TAS3C-5'D3[+]:AtCOR47	0.999995
AT1G20970.1	TAS4-3'D8[-]	726	5.5	0.111073	0.952956	no	NA	TAS4-3'D8[-]:AT1G20970.1	0.999995
AT1G21200.1	TAS3B-5'D5[+]	1318	5.5	0.603358	1.10908	no	NA	TAS3B-5'D5[+]:AT1G21200.1	0.999995
AT1G21250.1	TAS3C-5'D8[-]	1461	5	0.156325	0.990602	no	PRO25	TAS3C-5'D8[-]:PRO25	0.999995
AT1G22030.1	TAS3C-5'D8[+]	1165	6	0.733628	0.824556	no	NA	TAS3C-5'D8[+]:AT1G22030.1	0.999995
AT1G22060.1	TAS1C-3'D10[-]	5870	6	0.141241	0.894652	no	NA	TAS1C-3'D10[-]:AT1G22060.1	0.999995
AT1G22520.2	TAS3B-5'D9[+]	57	6	0.178265	0.879254	no	NA	TAS3B-5'D9[+]:AT1G22520.2	0.999995
AT1G22640.1	TAS2-3'D9[+]	476	5.5	0.38944	0.312998	no	ATMYB3	TAS2-3'D9[+]:ATMYB3	0.999995
AT1G22770.1	TAS1A-3'D8[+]	3624	5.5	0.127528	0.790436	no	FB	TAS1A-3'D8[+]:FB	0.999995
AT1G23360.3	TAS1A-3'D4[+]	586	5.5	2.52999	0.582509	no	MENG	TAS1A-3'D4[+]:MENG	0.999995
AT1G23570.3	TAS1C-3'D5[-]	373	5.5	0.427836	1.1039	no	NA	TAS1C-3'D5[-]:AT1G23570.3	0.999995
AT1G23660.1	TAS3C-5'D8[-]	286	5	0.131642	0.915673	no	NA	TAS3C-5'D8[-]:AT1G23660.1	0.999995
AT1G23740.1	TAS1A-3'D9[-]	603	5	0.127528	0.453217	no	AOR	TAS1A-3'D9[-]:AOR	0.999995
AT1G24620.1	TAS1B-3'D2[+]	378	4.5	0.117929	0.974888	no	NA	TAS1B-3'D2[+]:AT1G24620.1	0.999995
AT1G27320.1	TAS3A-5'D6[-]	324	6	0.137127	1.13713	no	AHK3	TAS3A-5'D6[-]:AHK3	0.999995
AT1G28280.2	TAS3C-5'D4[+]	971	5.5	0.10833	0.787576	no	NA	TAS3C-5'D4[+]:AT1G28280.2	0.999995
AT1G29470.2	TAS4-3'D1[-]	1529	4	0.267397	0.769407	no	NA	TAS4-3'D1[-]:AT1G29470.2	0.999995
AT1G29470.2	TAS3B-5'D7[+]	1806	5.5	0.139869	0.886903	no	NA	TAS3B-5'D7[+]:AT1G29470.2	0.999995
AT1G31330.1	TAS3C-5'D1[+]	358	5	1.71957	0.00525203	no	PSAF	TAS3C-5'D1[+]:PSAF	0.999995
AT1G32700.2	TAS3A-5'D4[+]	1209	5	0.697975	0.493474	no	NA	TAS3A-5'D4[+]:AT1G32700.2	0.999995
AT1G32750.1	TAS3A-5'D6[+]	5178	4	0.27014	0.465862	no	GTD1	TAS3A-5'D6[+]:GTD1	0.999995
AT1G33980.2	TAS3C-5'D2[+]	1939	6	0.148097	0.912783	no	ATUPF3	TAS3C-5'D2[+]:ATUPF3	0.999995
AT1G34770.1	TAS3B-5'D10[+]	764	6	0.113815	0.980682	no	NA	TAS3B-5'D10[+]:AT1G34770.1	0.999995
AT1G42550.1	TAS3A-5'D1[+]	2397	4.5	0.818647	0.644986	no	PMI1	TAS3A-5'D1[+]:PMI1	0.999995
AT1G42550.1	TAS3C-5'D3[-]	779	6	0.127528	0.702029	no	PMI1	TAS3C-5'D3[-]:PMI1	0.999995
AT1G44170.3	TAS4-3'D9[+]	870	6	0.153582	0.891864	no	ALDH3H1	TAS4-3'D9[+]:ALDH3H1	0.999995
AT1G47270.2	TAS3C-5'D4[+]	330	5.5	0.115187	0.969021	no	AtTLP6	TAS3C-5'D4[+]:AtTLP6	0.999995
AT1G48920.1	TAS4-3'D9[+]	1286	6	0.285224	0.389668	no	ATNUC-L1	TAS4-3'D9[+]:ATNUC-L1	0.999995
AT1G49130.2	TAS3C-5'D4[+]	765	5.5	0.139869	0.909215	no	BBX17	TAS3C-5'D4[+]:BBX17	0.999995
AT1G49620.1	TAS3C-5'D3[+]	428	6	0.283852	0.584699	no	ICK5	TAS3C-5'D3[+]:ICK5	0.999995
AT1G50360.1	TAS3C-5'D5[+]	3565	5.5	0.168666	0.970396	no	ATVIIIA	TAS3C-5'D5[+]:ATVIIIA	0.999995
AT1G50920.1	TAS4-3'D2[-]	1957	5	0.165923	0.486344	no	NA	TAS4-3'D2[-]:AT1G50920.1	0.999995
AT1G52700.1	TAS1A-3'D7[-]	789	6	0.244086	0.736853	no	NA	TAS1A-3'D7[-]:AT1G52700.1	0.999995
AT1G54060.1	TAS3B-5'D7[+]	1148	5.5	0.466231	0.64754	no	ASIL1	TAS3B-5'D7[+]:ASIL1	0.999995
AT1G54380.1	TAS3B-5'D7[+]	324	5.5	0.157696	0.632753	no	NA	TAS3B-5'D7[+]:AT1G54380.1	0.999995
AT1G54570.1	TAS3C-5'D4[+]	1791	5	0.112444	0.87869	no	PES1	TAS3C-5'D4[+]:PES1	0.999995
AT1G54770.1	TAS3B-5'D7[+]	656	6	3.08672	0.676369	no	NA	TAS3B-5'D7[+]:AT1G54770.1	0.999995
AT1G56110.1	TAS3C-5'D8[-]	1540	5	0.601987	0.519626	no	NOP56	TAS3C-5'D8[-]:NOP56	0.999995
AT1G56660.1	TAS3B-5'D7[+]	534	5.5	0.120672	0.861851	no	NA	TAS3B-5'D7[+]:AT1G56660.1	0.999995
AT1G57610.3	TAS3B-5'D9[+]	322	5.5	0.176894	0.883656	no	NA	TAS3B-5'D9[+]:AT1G57610.3	0.999995
AT1G57720.2	TAS3B-5'D8[+]	1181	6	0.263283	0.688914	no	NA	TAS3B-5'D8[+]:AT1G57720.2	0.999995
AT1G58210.1	TAS2-3'D8[-]	793	6	0.163181	0.902154	no	EMB1674	TAS2-3'D8[-]:EMB1674	0.999995
AT1G61100.2	TAS3A-5'D7[+]	823	4	0.143983	0.577236	no	NA	TAS3A-5'D7[+]:AT1G61100.2	0.999995
AT1G61680.2	TAS2-3'D5[-]	1305	6	0.264655	0.221629	no	ATTPS14	TAS2-3'D5[-]:ATTPS14	0.999995
AT1G62540.1	TAS3C-5'D3[+]	1156	6	0.115187	1.11519	no	FMO GS-OX2	TAS3C-5'D3[+]:FMO GS-OX2	0.999995
AT1G62910.1	TAS3C-5'D3[+]	1245	5.5	0.0507369	0.916293	no	RFL9	TAS3C-5'D3[+]:RFL9	0.999995
AT1G62930.1	TAS3C-5'D3[+]	1233	5.5	0.091875	0.934292	no	RPF3	TAS3C-5'D3[+]:RPF3	0.999995
AT1G63080.1	TAS1A-3'D9[-]	1489	4.5	0.133013	0.99279	no	NA	TAS1A-3'D9[-]:AT1G63080.1	0.999995
AT1G63090.1	TAS3C-5'D8[+]	1162	6	0.134384	1.00853	no	AtPP2-A11	TAS3C-5'D8[+]:AtPP2-A11	0.999995
AT1G63460.1	TAS3B-5'D10[-]	267	6	0.126157	0.991548	no	ATGPX8	TAS3B-5'D10[-]:ATGPX8	0.999995
AT1G63700.1	TAS3A-5'D2[-]	2735	6	0.142612	0.456014	no	EMB71	TAS3A-5'D2[-]:EMB71	0.999995
AT1G64230.5	TAS3C-5'D9[+]	777	6	0.127528	0.712985	no	UBC28	TAS3C-5'D9[+]:UBC28	0.999995
AT1G64330.1	TAS3B-5'D7[+]	1603	6	0.150839	0.768368	no	NA	TAS3B-5'D7[+]:AT1G64330.1	0.999995
AT1G64330.1	TAS3C-5'D7[-]	1902	3.5	0.127528	0.801218	no	NA	TAS3C-5'D7[-]:AT1G64330.1	0.999995
AT1G65010.1	TAS4-3'D6[+]	3147	6	0.260541	0.842383	no	NA	TAS4-3'D6[+]:AT1G65010.1	0.999995
AT1G65960.2	TAS3B-5'D6[+]	1452	6	2.70825	0.195306	no	GAD2	TAS3B-5'D6[+]:GAD2	0.999995
AT1G66330.2	TAS1A-3'D3[-]	1374	6	0.157696	0.765934	no	NA	TAS1A-3'D3[-]:AT1G66330.2	0.999995
AT1G66350.1	TAS1C-3'D7[-]	1591	5	0.436063	0.653204	no	RGL	TAS1C-3'D7[-]:RGL	0.999995
AT1G66760.2	TAS3C-5'D3[+]	218	6	0.157696	0.863905	no	NA	TAS3C-5'D3[+]:AT1G66760.2	0.999995
AT1G67630.1	TAS1B-3'D4[+]	1803	5	0.134384	0.969528	no	EMB2814	TAS1B-3'D4[+]:EMB2814	0.999995
AT1G68560.1	TAS1A-3'D7[+]	2201	5.5	1.241	0.277781	no	ATXYL1	TAS1A-3'D7[+]:ATXYL1	0.999995
AT1G68590.2	TAS3A-5'D5[+]	192	5	0.706203	0.956196	no	PSRP3/1	TAS3A-5'D5[+]:PSRP3/1	0.999995
AT1G68600.1	TAS2-3'D1[+]	1178	4.5	0.135756	0.974126	no	NA	TAS2-3'D1[+]:AT1G68600.1	0.999995
AT1G68670.1	TAS3C-5'D3[+]	606	5.5	0.285224	0.871658	no	NA	TAS3C-5'D3[+]:AT1G68670.1	0.999995
AT1G68780.1	TAS3C-5'D3[-]	487	5	0.16181	0.998821	no	NA	TAS3C-5'D3[-]:AT1G68780.1	0.999995
AT1G70700.2	TAS1C-3'D5[-]	1014	6	0.138498	0.801207	no	JAZ9	TAS1C-3'D5[-]:JAZ9	0.999995
AT1G71030.1	TAS1C-3'D1[+]	737	4	0.404524	0.512318	no	ATMYBL2	TAS1C-3'D1[+]:ATMYBL2	0.999995
AT1G71300.1	TAS4-3'D2[-]	1919	5.5	0.105588	0.973438	no	NA	TAS4-3'D2[-]:AT1G71300.1	0.999995
AT1G72260.1	TAS2-3'D3[+]	140	6	2.02673	0.0882467	no	THI2.1	TAS2-3'D3[+]:THI2.1	0.999995
AT1G72440.1	TAS3C-5'D10[+]	2809	5.5	0.622556	0.633687	no	EDA25	TAS3C-5'D10[+]:EDA25	0.999995
AT1G72610.1	TAS3B-5'D7[+]	54	4.5	0.164552	0.932985	no	ATGER1	TAS3B-5'D7[+]:ATGER1	0.999995
AT1G72800.1	TAS1C-3'D5[-]	923	5.5	0.141241	0.70996	no	NA	TAS1C-3'D5[-]:AT1G72800.1	0.999995
AT1G73760.1	TAS4-3'D4[+]	1036	6	0.360644	0.887325	no	NA	TAS4-3'D4[+]:AT1G73760.1	0.999995
AT1G74030.1	TAS3C-5'D4[+]	760	5	0.138498	0.899269	no	ENO1	TAS3C-5'D4[+]:ENO1	0.999995
AT1G74050.1	TAS4-3'D8[+]	822	4.5	0.126157	0.902225	no	NA	TAS4-3'D8[+]:AT1G74050.1	0.999995
AT1G74060.1	TAS4-3'D8[+]	771	4.5	0.126157	0.98916	no	NA	TAS4-3'D8[+]:AT1G74060.1	0.999995
AT1G74160.1	TAS3C-5'D2[+]	3844	6	0.127528	0.979744	no	TRM4	TAS3C-5'D2[+]:TRM4	0.999995
AT1G74250.1	TAS3B-5'D7[+]	789	6	0.403153	0.825036	no	NA	TAS3B-5'D7[+]:AT1G74250.1	0.999995
AT1G74470.1	TAS3B-5'D7[+]	560	5	1.09153	0.366625	no	NA	TAS3B-5'D7[+]:AT1G74470.1	0.999995
AT1G75310.1	TAS3C-5'D8[-]	3503	6	0.145354	0.988169	no	AUL1	TAS3C-5'D8[-]:AUL1	0.999995
AT1G75870.1	TAS1A-3'D7[-]	562	4.5	0.141241	0.859541	no	NA	TAS1A-3'D7[-]:AT1G75870.1	0.999995
AT1G75940.1	TAS2-3'D3[+]	1613	6	0.141241	0.129852	no	ATA27	TAS2-3'D3[+]:ATA27	0.999995
AT1G76620.1	TAS3A-5'D6[+]	1750	6	0.401782	1.10364	no	NA	TAS3A-5'D6[+]:AT1G76620.1	0.999995
AT1G76890.2	TAS3C-5'D5[+]	1311	5	0.165923	0.810341	no	AT-GT2	TAS3C-5'D5[+]:AT-GT2	0.999995
AT1G77590.1	TAS2-3'D8[-]	1691	5.5	0.101474	0.846195	no	LACS9	TAS2-3'D8[-]:LACS9	0.999995
AT1G77885.1	TAS1A-3'D9[+]	824	6	0.13027	1.13027	no	NA	TAS1A-3'D9[+]:AT1G77885.1	0.999995
AT1G78680.2	TAS4-3'D6[-]	1133	5	0.122043	0.0964435	no	ATGGH2	TAS4-3'D6[-]:ATGGH2	0.999995
AT1G78960.1	TAS2-3'D10[-]	135	5.5	0.124785	1.12478	no	ATLUP2	TAS2-3'D10[-]:ATLUP2	0.999995
AT1G80120.1	TAS3B-5'D7[+]	81	4	0.141241	0.918346	no	NA	TAS3B-5'D7[+]:AT1G80120.1	0.999995
AT1G80480.1	TAS3C-5'D2[+]	946	6	0.127528	0.881061	no	PTAC17	TAS3C-5'D2[+]:PTAC17	0.999995
AT2G01026.1	TAS3B-5'D9[+]	1251	6	0.00274254	0.9799	no	NA	TAS3B-5'D9[+]:AT2G01026.1	0.999995
AT2G01028.1	TAS3B-5'D9[+]	1173	6	0.00274254	0.9799	no	NA	TAS3B-5'D9[+]:AT2G01028.1	0.999995
AT2G01037.1	TAS3B-5'D9[+]	3585	6	0.00274254	0.9799	no	NA	TAS3B-5'D9[+]:AT2G01037.1	0.999995
AT2G01350.4	TAS1A-3'D7[-]	944	5	0.150839	0.51958	no	QPT	TAS1A-3'D7[-]:QPT	0.999995
AT2G02360.1	TAS3B-5'D10[+]	637	5	0.152211	0.824381	no	AtPP2-B10	TAS3B-5'D10[+]:AtPP2-B10	0.999995
AT2G03280.2	TAS3C-5'D8[-]	1024	6	0.141241	1.01093	no	NA	TAS3C-5'D8[-]:AT2G03280.2	0.999995
AT2G03740.1	TAS3B-5'D1[+]	301	5.5	0.477201	0.854113	no	NA	TAS3B-5'D1[+]:AT2G03740.1	0.999995
AT2G03820.1	TAS1C-3'D8[+]	1183	5	0.13027	0.829017	no	AtNMD3	TAS1C-3'D8[+]:AtNMD3	0.999995
AT2G04350.2	TAS3B-5'D8[+]	1766	6	0.113815	0.897266	no	LACS8	TAS3B-5'D8[+]:LACS8	0.999995
AT2G06470.1	TAS3B-5'D9[+]	1250	6	0.00274254	0.9799	no	NA	TAS3B-5'D9[+]:AT2G06470.1	0.999995
AT2G07660.1	TAS3B-5'D9[+]	1081	6	0.00274254	0.9799	no	NA	TAS3B-5'D9[+]:AT2G07660.1	0.999995
AT2G07772.1	TAS3C-5'D3[+]	30	5.5	0.159067	0.33672	no	NA	TAS3C-5'D3[+]:AT2G07772.1	0.999995
AT2G10780.1	TAS3B-5'D9[+]	1722	6	0.0041138	0.98124	no	NA	TAS3B-5'D9[+]:AT2G10780.1	0.999995
AT2G12930.1	TAS3B-5'D9[+]	2474	5.5	0.0178265	0.885476	no	NA	TAS3B-5'D9[+]:AT2G12930.1	0.999995
AT2G16365.4	TAS1C-3'D9[-]	1069	6	0.146726	1.00723	no	NA	TAS1C-3'D9[-]:AT2G16365.4	0.999995
AT2G16440.1	TAS1C-3'D4[+]	2090	6	0.139869	0.898405	no	MCM4	TAS1C-3'D4[+]:MCM4	0.999995
AT2G16485.1	TAS3C-5'D3[+]	264	6	0.135756	0.974126	no	NERD	TAS3C-5'D3[+]:NERD	0.999995
AT2G17420.1	TAS2-3'D2[-]	462	5.5	0.810419	0.945568	no	ATNTRA	TAS2-3'D2[-]:ATNTRA	0.999995
AT2G17710.1	TAS3C-5'D1[+]	375	5.5	0.186492	0.841478	no	NA	TAS3C-5'D1[+]:AT2G17710.1	0.999995
AT2G17840.1	TAS1A-3'D3[-]	614	5.5	0.148097	0.526491	no	ERD7	TAS1A-3'D3[-]:ERD7	0.999995
AT2G18020.1	TAS3C-5'D10[-]	425	6	1.49742	0.511264	no	EMB2296	TAS3C-5'D10[-]:EMB2296	0.999995
AT2G18630.1	TAS4-3'D6[+]	1579	6	0.137127	0.662209	no	NA	TAS4-3'D6[+]:AT2G18630.1	0.999995
AT2G18900.1	TAS1A-3'D7[-]	2340	6	0.143983	0.844169	no	NA	TAS1A-3'D7[-]:AT2G18900.1	0.999995
AT2G18969.1	TAS3A-5'D1[+]	328	6	0.165923	0.849188	no	NA	TAS3A-5'D1[+]:AT2G18969.1	0.999995
AT2G19110.1	TAS1A-3'D9[-]	2223	4.5	0.419608	0.821464	no	ATHMA4	TAS1A-3'D9[-]:ATHMA4	0.999995
AT2G19160.1	TAS1A-3'D3[-]	220	4.5	0.149468	0.990547	no	NA	TAS1A-3'D3[-]:AT2G19160.1	0.999995
AT2G19480.3	TAS3A-5'D1[+]	1195	5.5	0.142612	0.727571	no	NAP1;2	TAS3A-5'D1[+]:NAP1;2	0.999995
AT2G20330.1	TAS1A-3'D9[-]	1746	5.5	0.13027	0.804735	no	NA	TAS1A-3'D9[-]:AT2G20330.1	0.999995
AT2G20720.1	TAS3B-5'D7[+]	1782	6	0.149468	1.0257	no	NA	TAS3B-5'D7[+]:AT2G20720.1	0.999995
AT2G20770.1	TAS3A-5'D1[+]	1345	5	0.135756	0.994	no	GCL2	TAS3A-5'D1[+]:GCL2	0.999995
AT2G22125.1	TAS2-3'D10[+]	731	5	0.143983	1	no	CSI1	TAS2-3'D10[+]:CSI1	0.999995
AT2G22420.1	TAS3A-5'D5[+]	945	6	1.05725	1.04748	no	NA	TAS3A-5'D5[+]:AT2G22420.1	0.999995
AT2G22430.1	TAS3C-5'D9[-]	1209	6	1.58793	0.533537	no	ATHB6	TAS3C-5'D9[-]:ATHB6	0.999995
AT2G22795.1	TAS3C-5'D3[+]	814	6	0.884468	0.866896	no	NA	TAS3C-5'D3[+]:AT2G22795.1	0.999995
AT2G24020.2	TAS1C-3'D1[-]	269	5	0.219403	0.726958	no	NA	TAS1C-3'D1[-]:AT2G24020.2	0.999995
AT2G24280.1	TAS2-3'D1[+]	2668	6	0.133013	0.893002	no	NA	TAS2-3'D1[+]:AT2G24280.1	0.999995
AT2G25170.1	TAS1C-3'D5[-]	327	4.5	0.154953	0.67259	no	CHD3	TAS1C-3'D5[-]:CHD3	0.999995
AT2G25290.3	TAS1B-3'D4[-]	696	4	0.18375	0.584363	no	Phox1	TAS1B-3'D4[-]:Phox1	0.999995
AT2G25530.1	TAS3B-5'D7[+]	494	6	0.145354	0.872552	no	NA	TAS3B-5'D7[+]:AT2G25530.1	0.999995
AT2G25620.1	TAS3A-5'D4[-]	1499	5.5	0.285224	0.775068	no	AtDBP1	TAS3A-5'D4[-]:AtDBP1	0.999995
AT2G26490.1	TAS2-3'D2[-]	1540	6	0.115187	0.885652	no	NA	TAS2-3'D2[-]:AT2G26490.1	0.999995
AT2G27020.1	TAS3B-5'D7[+]	88	5	0.127528	0.669449	no	PAG1	TAS3B-5'D7[+]:PAG1	0.999995
AT2G27090.1	TAS3B-5'D3[+]	2269	5	0.10833	0.685976	no	NA	TAS3B-5'D3[+]:AT2G27090.1	0.999995
AT2G27285.1	TAS3C-5'D8[-]	556	6	0.134384	0.864194	no	NA	TAS3C-5'D8[-]:AT2G27285.1	0.999995
AT2G28910.1	TAS3B-5'D7[+]	560	5.5	1.61124	0.747866	no	CXIP4	TAS3B-5'D7[+]:CXIP4	0.999995
AT2G28910.1	TAS3B-5'D7[+]	809	6	0.138498	0.445832	no	CXIP4	TAS3B-5'D7[+]:CXIP4	0.999995
AT2G29360.1	TAS3B-5'D7[+]	695	6	0.117929	0.884939	no	NA	TAS3B-5'D7[+]:AT2G29360.1	0.999995
AT2G29570.1	TAS1C-3'D6[-]	542	5	0.10833	0.714475	no	ATPCNA2	TAS1C-3'D6[-]:ATPCNA2	0.999995
AT2G29960.2	TAS3B-5'D1[+]	277	5	0.131642	0.752108	no	ATCYP5	TAS3B-5'D1[+]:ATCYP5	0.999995
AT2G30320.1	TAS2-3'D4[+]	871	5	0.152211	1.01572	no	NA	TAS2-3'D4[+]:AT2G30320.1	0.999995
AT2G30500.2	TAS1C-3'D5[-]	1354	6	0.256427	0.795874	no	NET4B	TAS1C-3'D5[-]:NET4B	0.999995
AT2G30500.2	TAS3C-5'D3[+]	1383	6	0.264655	0.767742	no	NET4B	TAS3C-5'D3[+]:NET4B	0.999995
AT2G30570.1	TAS3B-5'D7[+]	263	6	0.31402	0.61377	no	PSBW	TAS3B-5'D7[+]:PSBW	0.999995
AT2G30780.1	TAS1A-3'D7[-]	1289	6	0.139869	0.977654	no	NA	TAS1A-3'D7[-]:AT2G30780.1	0.999995
AT2G33150.1	TAS3B-5'D7[-]	1589	5	0.335961	0.676446	no	KAT2	TAS3B-5'D7[-]:KAT2	0.999995
AT2G33500.2	TAS3C-5'D3[+]	571	6	0.146726	0.777004	no	BBX12	TAS3C-5'D3[+]:BBX12	0.999995
AT2G33600.1	TAS3C-5'D3[+]	846	6	0.13027	0.113922	no	AtCRL2	TAS3C-5'D3[+]:AtCRL2	0.999995
AT2G35260.1	TAS3C-5'D3[+]	1038	6	1.11347	0.18661	no	NA	TAS3C-5'D3[+]:AT2G35260.1	0.999995
AT2G35880.1	TAS1C-3'D7[-]	327	5.5	0.133013	0.86315	no	NA	TAS1C-3'D7[-]:AT2G35880.1	0.999995
AT2G36160.1	TAS1B-3'D4[-]	536	5.5	0.338703	0.627712	no	NA	TAS1B-3'D4[-]:AT2G36160.1	0.999995
AT2G36420.1	TAS3A-5'D9[+]	1126	6	0.211175	0.565009	no	TRM27	TAS3A-5'D9[+]:TRM27	0.999995
AT2G36790.1	TAS3C-5'D8[-]	1028	6	0.0109701	0.896625	no	UGT73C6	TAS3C-5'D8[-]:UGT73C6	0.999995
AT2G39360.1	TAS1A-3'D7[-]	2255	5.5	0.128899	0.975126	no	NA	TAS1A-3'D7[-]:AT2G39360.1	0.999995
AT2G39870.1	TAS3C-5'D5[-]	1564	5	0.372985	0.54438	no	NA	TAS3C-5'D5[-]:AT2G39870.1	0.999995
AT2G40000.1	TAS3C-5'D3[+]	471	6	0.164552	1.02043	no	ATHSPRO2	TAS3C-5'D3[+]:ATHSPRO2	0.999995
AT2G40140.2	TAS3C-5'D3[+]	202	6	0.143983	1.01707	no	ATSZF2	TAS3C-5'D3[+]:ATSZF2	0.999995
AT2G40590.1	TAS3A-5'D4[+]	59	6	0.1193	0.783914	no	NA	TAS3A-5'D4[+]:AT2G40590.1	0.999995
AT2G41290.1	TAS3C-5'D10[+]	1046	4.5	0.481315	0.344001	no	SSL2	TAS3C-5'D10[+]:SSL2	0.999995
AT2G41310.1	TAS3C-5'D1[+]	510	6	0.134384	1.13438	no	ARR8	TAS3C-5'D1[+]:ARR8	0.999995
AT2G41870.1	TAS3C-5'D1[+]	691	6	0.396296	0.763735	no	NA	TAS3C-5'D1[+]:AT2G41870.1	0.999995
AT2G42010.1	TAS3B-5'D1[+]	3511	5	0.137127	0.900136	no	PLDBETA	TAS3B-5'D1[+]:PLDBETA	0.999995
AT2G42040.1	TAS1A-3'D7[-]	779	5.5	0.122043	0.659215	no	NA	TAS1A-3'D7[-]:AT2G42040.1	0.999995
AT2G42600.2	TAS2-3'D9[+]	2642	6	0.133013	0.795045	no	ATPPC2	TAS2-3'D9[+]:ATPPC2	0.999995
AT2G44200.1	TAS3B-5'D5[+]	1138	5.5	0.138498	0.46093	no	NA	TAS3B-5'D5[+]:AT2G44200.1	0.999995
AT2G44230.1	TAS4-3'D6[+]	1488	5	0.137127	0.797165	no	NA	TAS4-3'D6[+]:AT2G44230.1	0.999995
AT2G44440.1	TAS3B-5'D6[-]	228	5	0.128899	0.987999	no	AtEML4	TAS3B-5'D6[-]:AtEML4	0.999995
AT2G44730.1	TAS3C-5'D6[+]	1200	5.5	0.1193	0.997555	no	NA	TAS3C-5'D6[+]:AT2G44730.1	0.999995
AT2G44820.2	TAS3B-5'D7[+]	392	5.5	0.289338	0.915308	no	NA	TAS3B-5'D7[+]:AT2G44820.2	0.999995
AT2G45000.1	TAS1C-3'D9[+]	1795	5	0.133013	0.840326	no	EMB2766	TAS1C-3'D9[+]:EMB2766	0.999995
AT2G45140.1	TAS3A-5'D6[+]	544	5.5	0.138498	0.389378	no	PVA12	TAS3A-5'D6[+]:PVA12	0.999995
AT2G45770.2	TAS3C-5'D3[+]	395	6	0.141241	0.897547	no	CPFTSY	TAS3C-5'D3[+]:CPFTSY	0.999995
AT2G46300.1	TAS3A-5'D10[+]	889	5	0.137127	0.970734	no	NA	TAS3A-5'D10[+]:AT2G46300.1	0.999995
AT3G01040.2	TAS1C-3'D6[+]	2024	6	0.137127	1.13713	no	GAUT13	TAS1C-3'D6[+]:GAUT13	0.999995
AT3G02080.1	TAS1C-3'D7[-]	447	5	0.128899	0.962584	no	NA	TAS1C-3'D7[-]:AT3G02080.1	0.999995
AT3G02540.3	TAS1A-3'D9[-]	1330	5.5	0.272882	0.888916	no	RAD23-3	TAS1A-3'D9[-]:RAD23-3	0.999995
AT3G02875.1	TAS4-3'D2[+]	1085	6	0.152211	0.8687	no	ILR1	TAS4-3'D2[+]:ILR1	0.999995
AT3G03330.1	TAS3A-5'D8[+]	186	5.5	0.139869	0.89166	no	NA	TAS3A-5'D8[+]:AT3G03330.1	0.999995
AT3G03970.3	TAS2-3'D3[+]	2419	6	0.168666	0.874776	no	NA	TAS2-3'D3[+]:AT3G03970.3	0.999995
AT3G04400.2	TAS3C-5'D8[+]	574	5.5	0.282481	0.643116	no	emb2171	TAS3C-5'D8[+]:emb2171	0.999995
AT3G04920.1	TAS3A-5'D8[+]	255	5	2.0857	0.479159	no	NA	TAS3A-5'D8[+]:AT3G04920.1	0.999995
AT3G05020.1	TAS3C-5'D3[+]	258	5.5	0.157696	0.906578	no	ACP	TAS3C-5'D3[+]:ACP	0.999995
AT3G05030.2	TAS4-3'D6[+]	671	6	0.112444	0.949663	no	ATNHX2	TAS4-3'D6[+]:ATNHX2	0.999995
AT3G05060.1	TAS3C-5'D3[+]	1690	6	0.426464	1.03379	no	NA	TAS3C-5'D3[+]:AT3G05060.1	0.999995
AT3G05470.1	TAS3C-5'D3[+]	560	5.5	0.127528	0.989173	no	NA	TAS3C-5'D3[+]:AT3G05470.1	0.999995
AT3G05760.2	TAS3A-5'D6[+]	226	6	0.131642	0.860308	no	NA	TAS3A-5'D6[+]:AT3G05760.2	0.999995
AT3G08530.1	TAS1B-3'D8[-]	4613	6	0.219403	0.584554	no	NA	TAS1B-3'D8[-]:AT3G08530.1	0.999995
AT3G09310.1	TAS3C-5'D3[+]	533	5.5	0.152211	0.803107	no	NA	TAS3C-5'D3[+]:AT3G09310.1	0.999995
AT3G09670.2	TAS4-3'D8[-]	2099	5	0.229002	1.07047	no	NA	TAS4-3'D8[-]:AT3G09670.2	0.999995
AT3G09735.1	TAS3C-5'D3[+]	291	5.5	0.137127	0.828215	no	NA	TAS3C-5'D3[+]:AT3G09735.1	0.999995
AT3G09980.1	TAS1B-3'D9[-]	260	5.5	0.682892	0.503539	no	NA	TAS1B-3'D9[-]:AT3G09980.1	0.999995
AT3G10570.1	TAS4-3'D9[+]	1554	6	0.137127	0.852919	no	CYP77A6	TAS4-3'D9[+]:CYP77A6	0.999995
AT3G11100.1	TAS3C-5'D4[+]	336	5	0.150839	0.774038	no	NA	TAS3C-5'D4[+]:AT3G11100.1	0.999995
AT3G11490.1	TAS3C-5'D8[-]	1102	6	0.127528	0.575705	no	NA	TAS3C-5'D8[-]:AT3G11490.1	0.999995
AT3G11500.1	TAS4-3'D9[+]	286	4	0.752826	0.701855	no	NA	TAS4-3'D9[+]:AT3G11500.1	0.999995
AT3G11690.1	TAS3A-5'D1[+]	1196	6	0.127528	0.972789	no	NA	TAS3A-5'D1[+]:AT3G11690.1	0.999995
AT3G11910.2	TAS2-3'D3[+]	3297	6	0.137127	0.787325	no	AtUBP13	TAS2-3'D3[+]:AtUBP13	0.999995
AT3G11980.1	TAS3B-5'D7[+]	1817	5.5	0.157696	0.819462	no	FAR2	TAS3B-5'D7[+]:FAR2	0.999995
AT3G12010.1	TAS1A-3'D3[+]	2374	6	0.16181	0.940084	no	NA	TAS1A-3'D3[+]:AT3G12010.1	0.999995
AT3G12012.1	TAS1A-3'D3[+]	2374	6	0.16181	0.940084	no	CPuORF20	TAS1A-3'D3[+]:CPuORF20	0.999995
AT3G12130.1	TAS4-3'D9[-]	1060	4	0.27014	0.794213	no	NA	TAS4-3'D9[-]:AT3G12130.1	0.999995
AT3G12800.1	TAS2-3'D6[-]	762	5	0.13027	0.865581	no	DECR	TAS2-3'D6[-]:DECR	0.999995
AT3G13460.4	TAS1B-3'D5[-]	1090	5	0.30305	0.902207	no	ECT2	TAS1B-3'D5[-]:ECT2	0.999995
AT3G13960.1	TAS2-3'D6[-]	423	5	0.134384	1.00731	no	AtGRF5	TAS2-3'D6[-]:AtGRF5	0.999995
AT3G14230.3	TAS3C-5'D2[-]	1483	5	1.33424	0.452696	no	RAP2.2	TAS3C-5'D2[-]:RAP2.2	0.999995
AT3G14810.2	TAS3B-5'D8[-]	298	5.5	0.133013	0.911725	no	MSL5	TAS3B-5'D8[-]:MSL5	0.999995
AT3G16630.2	TAS1C-3'D7[-]	2545	5.5	0.245457	0.979509	no	ATKINESIN-13A	TAS1C-3'D7[-]:ATKINESIN-13A	0.999995
AT3G16840.1	TAS2-3'D1[-]	388	6	0.218032	0.420125	no	NA	TAS2-3'D1[-]:AT3G16840.1	0.999995
AT3G17050.1	TAS1A-3'D8[-]	39	5.5	0.622556	0.643682	no	NA	TAS1A-3'D8[-]:AT3G17050.1	0.999995
AT3G17185.2	TAS3C-5'D10[-]	618	6	0.137127	0.874506	no	TAS3a	TAS3C-5'D10[-]:TAS3a	0.999995
AT3G17998.1	TAS3A-5'D1[+]	1550	6	0.111073	0.538284	no	CPuORF30	TAS3A-5'D1[+]:CPuORF30	0.999995
AT3G18000.1	TAS3A-5'D1[+]	1550	6	0.111073	0.538284	no	NMT1	TAS3A-5'D1[+]:NMT1	0.999995
AT3G18730.1	TAS3C-5'D4[+]	1569	5.5	0.109701	1.1097	no	BRU1	TAS3C-5'D4[+]:BRU1	0.999995
AT3G18930.2	TAS4-3'D9[+]	1455	5.5	0.153582	0.66123	no	NA	TAS4-3'D9[+]:AT3G18930.2	0.999995
AT3G21480.1	TAS3C-5'D2[+]	1041	6	0.146726	0.455164	no	NA	TAS3C-5'D2[+]:AT3G21480.1	0.999995
AT3G22380.2	TAS3B-5'D7[+]	184	5.5	0.267397	0.661478	no	TIC	TAS3B-5'D7[+]:TIC	0.999995
AT3G23210.1	TAS1C-3'D7[-]	392	4.5	0.141241	0.86043	no	bHLH34	TAS1C-3'D7[-]:bHLH34	0.999995
AT3G23450.1	TAS4-3'D4[+]	300	5.5	0.154953	0.236704	no	NA	TAS4-3'D4[+]:AT3G23450.1	0.999995
AT3G23450.1	TAS4-3'D2[-]	317	5.5	1.44806	0.414476	no	NA	TAS4-3'D2[-]:AT3G23450.1	0.999995
AT3G24080.2	TAS3C-5'D3[+]	388	5.5	0.150839	0.711078	no	NA	TAS3C-5'D3[+]:AT3G24080.2	0.999995
AT3G24100.1	TAS3C-5'D2[+]	156	6	0.916007	0.572351	no	NA	TAS3C-5'D2[+]:AT3G24100.1	0.999995
AT3G25290.2	TAS4-3'D7[+]	1246	4	0.139869	0.675127	no	NA	TAS4-3'D7[+]:AT3G25290.2	0.999995
AT3G25882.1	TAS3C-5'D3[+]	104	6	0.106959	0.959584	no	NIMIN-2	TAS3C-5'D3[+]:NIMIN-2	0.999995
AT3G27820.1	TAS3C-5'D4[+]	1325	6	0.131642	0.58936	no	ATMDAR4	TAS3C-5'D4[+]:ATMDAR4	0.999995
AT3G28130.2	TAS1C-3'D8[+]	1299	5	0.134384	0.802182	no	UMAMIT44	TAS1C-3'D8[+]:UMAMIT44	0.999995
AT3G28730.1	TAS3C-5'D3[+]	1610	5.5	0.1193	0.847392	no	ATHMG	TAS3C-5'D3[+]:ATHMG	0.999995
AT3G29615.1	TAS3B-5'D9[+]	3035	6	0.0041138	0.98124	no	NA	TAS3B-5'D9[+]:AT3G29615.1	0.999995
AT3G29760.1	TAS3C-5'D8[-]	694	5.5	0.112444	0.425352	no	NA	TAS3C-5'D8[-]:AT3G29760.1	0.999995
AT3G31920.1	TAS1B-3'D8[+]	657	5.5	0.0589645	1.05896	no	NA	TAS1B-3'D8[+]:AT3G31920.1	0.999995
AT3G42630.1	TAS4-3'D1[+]	1324	6	0.142612	0.906446	no	NA	TAS4-3'D1[+]:AT3G42630.1	0.999995
AT3G42996.1	TAS3B-5'D9[+]	1251	6	0.25917	1.0408	no	NA	TAS3B-5'D9[+]:AT3G42996.1	0.999995
AT3G44530.2	TAS3C-5'D1[+]	3058	6	0.122043	0.971505	no	HIRA	TAS3C-5'D1[+]:HIRA	0.999995
AT3G45190.1	TAS1C-3'D5[-]	2319	6	0.123414	0.178127	no	NA	TAS1C-3'D5[-]:AT3G45190.1	0.999995
AT3G46430.1	TAS3C-5'D3[+]	86	6	0.148097	0.910797	no	NA	TAS3C-5'D3[+]:AT3G46430.1	0.999995
AT3G46590.3	TAS1A-3'D7[-]	1795	6	0.135756	0.740005	no	ATTRP2	TAS1A-3'D7[-]:ATTRP2	0.999995
AT3G46610.1	TAS3B-5'D8[+]	724	6	0.116558	0.802811	no	NA	TAS3B-5'D8[+]:AT3G46610.1	0.999995
AT3G46960.1	TAS4-3'D6[-]	2478	6	0.122043	1.12204	no	NA	TAS4-3'D6[-]:AT3G46960.1	0.999995
AT3G47590.1	TAS3C-5'D9[+]	1179	5	0.141241	0.99166	no	NA	TAS3C-5'D9[+]:AT3G47590.1	0.999995
AT3G47750.1	TAS3C-5'D3[+]	2739	6	0.145354	1.14535	no	ABCA4	TAS3C-5'D3[+]:ABCA4	0.999995
AT3G48570.1	TAS1A-3'D8[-]	194	4.5	0.105588	0.801243	no	NA	TAS1A-3'D8[-]:AT3G48570.1	0.999995
AT3G48870.2	TAS1C-3'D5[-]	702	6	0.124785	0.857778	no	ATCLPC	TAS1C-3'D5[-]:ATCLPC	0.999995
AT3G49640.2	TAS3C-5'D9[+]	251	6	0.160438	0.941062	no	NA	TAS3C-5'D9[+]:AT3G49640.2	0.999995
AT3G49910.1	TAS1C-3'D6[+]	581	5	2.25162	0.209563	no	NA	TAS1C-3'D6[+]:AT3G49910.1	0.999995
AT3G50890.1	TAS3B-5'D7[+]	692	4.5	1.57147	0.609788	no	AtHB28	TAS3B-5'D7[+]:AtHB28	0.999995
AT3G51840.1	TAS3A-5'D9[+]	354	6	0.135756	0.886541	no	ACX4	TAS3A-5'D9[+]:ACX4	0.999995
AT3G51860.1	TAS1B-3'D3[-]	947	6	0.141241	0.557342	no	ATCAX3	TAS1B-3'D3[-]:ATCAX3	0.999995
AT3G51940.1	TAS4-3'D2[-]	952	5	0.115187	0.864011	no	NA	TAS4-3'D2[-]:AT3G51940.1	0.999995
AT3G52300.2	TAS3B-5'D5[+]	377	6	0.304422	0.685216	no	ATPQ	TAS3B-5'D5[+]:ATPQ	0.999995
AT3G52540.1	TAS3B-5'D7[+]	1042	5.5	0.150839	0.898314	no	ATOFP18	TAS3B-5'D7[+]:ATOFP18	0.999995
AT3G52570.1	TAS2-3'D9[-]	640	5	0.117929	0.829138	no	NA	TAS2-3'D9[-]:AT3G52570.1	0.999995
AT3G53580.1	TAS1A-3'D3[+]	875	5.5	0.335961	1.03726	no	NA	TAS1A-3'D3[+]:AT3G53580.1	0.999995
AT3G54010.2	TAS3C-5'D3[+]	1569	6	0.142612	0.915408	no	DEI1	TAS3C-5'D3[+]:DEI1	0.999995
AT3G54230.2	TAS3B-5'D7[+]	2423	6	0.13027	0.632943	no	SUA	TAS3B-5'D7[+]:SUA	0.999995
AT3G54340.1	TAS2-3'D3[+]	496	4.5	0.463489	0.587612	no	AP3	TAS2-3'D3[+]:AP3	0.999995
AT3G55690.1	TAS3C-5'D2[+]	989	4.5	0.580046	0.890284	no	NA	TAS3C-5'D2[+]:AT3G55690.1	0.999995
AT3G56150.2	TAS3C-5'D10[+]	271	6	0.1193	0.855384	no	ATEIF3C-1	TAS3C-5'D10[+]:ATEIF3C-1	0.999995
AT3G56360.1	TAS1B-3'D4[-]	361	5	0.128899	0.240278	no	NA	TAS1B-3'D4[-]:AT3G56360.1	0.999995
AT3G57180.1	TAS3A-5'D9[+]	599	6	0.238601	0.800577	no	BPG2	TAS3A-5'D9[+]:BPG2	0.999995
AT3G57950.1	TAS3A-5'D6[+]	530	6	0.152211	0.654783	no	NA	TAS3A-5'D6[+]:AT3G57950.1	0.999995
AT3G58030.4	TAS3C-5'D3[+]	1884	6	0.149468	0.752976	no	NA	TAS3C-5'D3[+]:AT3G58030.4	0.999995
AT3G58090.1	TAS3C-5'D2[+]	338	5.5	0.407267	0.751144	no	NA	TAS3C-5'D2[+]:AT3G58090.1	0.999995
AT3G58840.2	TAS1A-3'D9[-]	422	4.5	0.25917	0.453402	no	PMD1	TAS1A-3'D9[-]:PMD1	0.999995
AT3G59940.1	TAS4-3'D9[+]	1241	6	0.153582	0.514448	no	NA	TAS4-3'D9[+]:AT3G59940.1	0.999995
AT3G59940.1	TAS3A-5'D2[-]	1325	6	0.127528	0.35484	no	NA	TAS3A-5'D2[-]:AT3G59940.1	0.999995
AT3G60110.1	TAS3A-5'D6[+]	1854	5.5	0.246828	0.910844	no	NA	TAS3A-5'D6[+]:AT3G60110.1	0.999995
AT3G60110.1	TAS3B-5'D5[+]	1925	5	0.146726	0.718274	no	NA	TAS3B-5'D5[+]:AT3G60110.1	0.999995
AT3G60360.1	TAS3B-5'D7[+]	607	6	0.64861	0.729409	no	EDA14	TAS3B-5'D7[+]:EDA14	0.999995
AT3G60360.1	TAS3C-5'D2[+]	640	5.5	0.150839	0.551686	no	EDA14	TAS3C-5'D2[+]:EDA14	0.999995
AT3G60750.2	TAS3B-5'D7[+]	2144	5.5	0.120672	0.633897	no	NA	TAS3B-5'D7[+]:AT3G60750.2	0.999995
AT3G62600.1	TAS3A-5'D1[+]	480	6	0.120672	0.817864	no	ATERDJ3B	TAS3A-5'D1[+]:ATERDJ3B	0.999995
AT3G62940.3	TAS3B-5'D7[+]	679	6	0.165923	0.787816	no	NA	TAS3B-5'D7[+]:AT3G62940.3	0.999995
AT3G63120.1	TAS4-3'D6[-]	401	4.5	0.135756	0.891311	no	CYCP1;1	TAS4-3'D6[-]:CYCP1;1	0.999995
AT4G00340.1	TAS1B-3'D4[-]	2175	5	0.175522	0.315253	no	RLK4	TAS1B-3'D4[-]:RLK4	0.999995
AT4G00990.1	TAS3C-5'D3[+]	184	6	0.149468	0.821613	no	NA	TAS3C-5'D3[+]:AT4G00990.1	0.999995
AT4G01330.2	TAS1A-3'D7[-]	996	6	0.133013	0.360297	no	NA	TAS1A-3'D7[-]:AT4G01330.2	0.999995
AT4G01460.1	TAS3B-5'D6[+]	1064	6	0.178265	0.738664	no	NA	TAS3B-5'D6[+]:AT4G01460.1	0.999995
AT4G01730.1	TAS3C-5'D6[-]	490	6	0.126157	1.12616	no	NA	TAS3C-5'D6[-]:AT4G01730.1	0.999995
AT4G03290.1	TAS3A-5'D1[+]	407	5	0.278367	0.303838	no	NA	TAS3A-5'D1[+]:AT4G03290.1	0.999995
AT4G03840.1	TAS3B-5'D9[+]	1251	6	0.0041138	0.98124	no	NA	TAS3B-5'D9[+]:AT4G03840.1	0.999995
AT4G04320.2	TAS1A-3'D5[+]	121	6	0.305793	1.13464	no	NA	TAS1A-3'D5[+]:AT4G04320.2	0.999995
AT4G04460.2	TAS1C-3'D7[-]	904	5	0.185121	0.918194	no	NA	TAS1C-3'D7[-]:AT4G04460.2	0.999995
AT4G04640.1	TAS4-3'D9[-]	1325	6	0.913265	0.671682	no	ATPC1	TAS4-3'D9[-]:ATPC1	0.999995
AT4G04960.1	TAS2-3'D10[+]	1683	6	0.126157	0.97972	no	NA	TAS2-3'D10[+]:AT4G04960.1	0.999995
AT4G06196.1	TAS1B-3'D8[+]	649	5.5	0.0713059	1.07131	no	NA	TAS1B-3'D8[+]:AT4G06196.1	0.999995
AT4G08810.1	TAS1C-3'D7[-]	1295	6	0.241343	0.664526	no	SUB1	TAS1C-3'D7[-]:SUB1	0.999995
AT4G08990.1	TAS3C-5'D3[+]	1929	6	0.020569	0.78157	no	NA	TAS3C-5'D3[+]:AT4G08990.1	0.999995
AT4G09160.1	TAS1A-3'D7[-]	1866	6	0.126157	0.60375	no	NA	TAS1A-3'D7[-]:AT4G09160.1	0.999995
AT4G10430.3	TAS1C-3'D7[-]	845	5.5	0.117929	0.823277	no	NA	TAS1C-3'D7[-]:AT4G10430.3	0.999995
AT4G11080.1	TAS3B-5'D7[+]	838	6	0.167295	0.842614	no	3xHMG-box1	TAS3B-5'D7[+]:3xHMG-box1	0.999995
AT4G11160.1	TAS3C-5'D3[+]	1714	5	0.149468	0.831391	no	NA	TAS3C-5'D3[+]:AT4G11160.1	0.999995
AT4G11560.1	TAS3C-5'D3[+]	231	6	0.239972	0.709077	no	NA	TAS3C-5'D3[+]:AT4G11560.1	0.999995
AT4G11960.2	TAS3A-5'D8[-]	910	6	0.352416	0.479869	no	PGRL1B	TAS3A-5'D8[-]:PGRL1B	0.999995
AT4G12400.2	TAS4-3'D9[+]	1748	6	0.139869	1.13987	no	Hop3	TAS4-3'D9[+]:Hop3	0.999995
AT4G12420.2	TAS3B-5'D7[+]	1677	4.5	0.141241	0.906344	no	SKU5	TAS3B-5'D7[+]:SKU5	0.999995
AT4G13540.1	TAS3B-5'D7[+]	163	5.5	0.788479	0.627874	no	NA	TAS3B-5'D7[+]:AT4G13540.1	0.999995
AT4G13550.1	TAS1A-3'D7[-]	2490	5	0.128899	0.817324	no	NA	TAS1A-3'D7[-]:AT4G13550.1	0.999995
AT4G14500.2	TAS3C-5'D4[+]	1366	5	0.246828	0.495707	no	NA	TAS3C-5'D4[+]:AT4G14500.2	0.999995
AT4G14570.1	TAS3B-5'D7[+]	2280	5.5	0.112444	1.11244	no	AARE	TAS3B-5'D7[+]:AARE	0.999995
AT4G14990.1	TAS3A-5'D6[+]	2970	5	0.575933	0.349078	no	NA	TAS3A-5'D6[+]:AT4G14990.1	0.999995
AT4G15020.2	TAS3A-5'D9[+]	979	5	0.13027	0.89861	no	NA	TAS3A-5'D9[+]:AT4G15020.2	0.999995
AT4G15110.1	TAS2-3'D4[+]	1734	5	0.148097	0.729154	no	CYP97B3	TAS2-3'D4[+]:CYP97B3	0.999995
AT4G15520.1	TAS3B-5'D9[+]	598	5.5	0.131642	0.982148	no	NA	TAS3B-5'D9[+]:AT4G15520.1	0.999995
AT4G16141.1	TAS1B-3'D4[+]	153	5	0.393554	0.378175	no	NA	TAS1B-3'D4[+]:AT4G16141.1	0.999995
AT4G16155.1	TAS3B-5'D9[+]	1564	6	0.160438	0.66884	no	NA	TAS3B-5'D9[+]:AT4G16155.1	0.999995
AT4G16190.1	TAS4-3'D8[+]	577	5.5	0.388069	0.53836	no	NA	TAS4-3'D8[+]:AT4G16190.1	0.999995
AT4G16330.2	TAS3C-5'D2[+]	921	6	0.135756	0.88749	no	NA	TAS3C-5'D2[+]:AT4G16330.2	0.999995
AT4G16430.1	TAS2-3'D2[+]	1104	5	0.250942	0.816514	no	NA	TAS2-3'D2[+]:AT4G16430.1	0.999995
AT4G17230.1	TAS3B-5'D7[+]	1570	4.5	0.141241	0.595635	no	SCL13	TAS3B-5'D7[+]:SCL13	0.999995
AT4G17960.1	TAS1B-3'D10[+]	580	6	0.149468	1.01946	no	NA	TAS1B-3'D10[+]:AT4G17960.1	0.999995
AT4G18480.1	TAS3B-5'D3[+]	949	4.5	0.246828	0.96806	no	CH-42	TAS3B-5'D3[+]:CH-42	0.999995
AT4G18905.2	TAS3C-5'D3[+]	317	6	0.13027	0.916597	no	NA	TAS3C-5'D3[+]:AT4G18905.2	0.999995
AT4G18970.2	TAS3B-5'D10[-]	824	6	0.135756	0.701165	no	NA	TAS3B-5'D10[-]:AT4G18970.2	0.999995
AT4G19490.2	TAS1C-3'D1[+]	3411	5	0.135756	0.730219	no	ATVPS54	TAS1C-3'D1[+]:ATVPS54	0.999995
AT4G19865.1	TAS4-3'D7[-]	1248	5	0.507369	0.558775	no	NA	TAS4-3'D7[-]:AT4G19865.1	0.999995
AT4G21550.1	TAS3C-5'D3[+]	2083	6	0.141241	1.00848	no	VAL3	TAS3C-5'D3[+]:VAL3	0.999995
AT4G21660.2	TAS3B-5'D7[+]	1739	6	0.59513	0.452406	no	NA	TAS3B-5'D7[+]:AT4G21660.2	0.999995
AT4G22220.1	TAS3C-5'D3[+]	643	5.5	0.267397	0.471978	no	ATISU1	TAS3C-5'D3[+]:ATISU1	0.999995
AT4G22570.1	TAS3C-5'D2[+]	492	6	0.123414	0.677486	no	APT3	TAS3C-5'D2[+]:APT3	0.999995
AT4G23500.1	TAS1B-3'D8[-]	1118	4	0.621184	0.798145	no	NA	TAS1B-3'D8[-]:AT4G23500.1	0.999995
AT4G23710.1	TAS1A-3'D3[+]	89	6	1.05999	0.410311	no	VAG2	TAS1A-3'D3[+]:VAG2	0.999995
AT4G24000.1	TAS3B-5'D7[+]	706	5	0.131642	0.902653	no	ATCSLG2	TAS3B-5'D7[+]:ATCSLG2	0.999995
AT4G24290.2	TAS3C-5'D3[+]	2072	5	0.13027	0.724138	no	NA	TAS3C-5'D3[+]:AT4G24290.2	0.999995
AT4G24590.1	TAS3A-5'D1[+]	302	6	0.159067	0.800996	no	NA	TAS3A-5'D1[+]:AT4G24590.1	0.999995
AT4G25600.1	TAS2-3'D8[-]	910	4	0.29208	0.82563	no	NA	TAS2-3'D8[-]:AT4G25600.1	0.999995
AT4G25730.1	TAS3B-5'D7[+]	2386	6	0.77888	0.654763	no	NA	TAS3B-5'D7[+]:AT4G25730.1	0.999995
AT4G26080.1	TAS3C-5'D3[+]	1464	4	0.581418	0.353081	no	ABI1	TAS3C-5'D3[+]:ABI1	0.999995
AT4G26630.2	TAS3C-5'D3[+]	836	6	2.92491	0.388457	no	NA	TAS3C-5'D3[+]:AT4G26630.2	0.999995
AT4G26630.2	TAS3B-5'D9[+]	969	6	0.899552	0.612334	no	NA	TAS3B-5'D9[+]:AT4G26630.2	0.999995
AT4G27180.1	TAS3C-5'D8[-]	169	5.5	0.122043	0.853901	no	ATK2	TAS3C-5'D8[-]:ATK2	0.999995
AT4G27430.2	TAS3C-5'D3[+]	2435	5.5	0.153582	1.0096	no	CIP7	TAS3C-5'D3[+]:CIP7	0.999995
AT4G27900.2	TAS3C-5'D2[+]	877	6	0.408638	0.712256	no	NA	TAS3C-5'D2[+]:AT4G27900.2	0.999995
AT4G28260.2	TAS1A-3'D5[+]	378	5	0.141241	0.543156	no	NA	TAS1A-3'D5[+]:AT4G28260.2	0.999995
AT4G28750.1	TAS3A-5'D7[+]	329	6	0.227631	0.665985	no	PSAE-1	TAS3A-5'D7[+]:PSAE-1	0.999995
AT4G29590.1	TAS1C-3'D8[-]	796	5	0.122043	0.0566608	no	NA	TAS1C-3'D8[-]:AT4G29590.1	0.999995
AT4G30690.2	TAS3A-5'D1[+]	319	5	0.142612	0.644806	no	NA	TAS3A-5'D1[+]:AT4G30690.2	0.999995
AT4G32390.1	TAS4-3'D9[+]	1111	5	0.250942	0.80145	no	NA	TAS4-3'D9[+]:AT4G32390.1	0.999995
AT4G32420.4	TAS3C-5'D8[-]	784	6	0.278367	1.01304	no	NA	TAS3C-5'D8[-]:AT4G32420.4	0.999995
AT4G32940.1	TAS3B-5'D2[-]	1024	3.5	0.134384	0.847375	no	GAMMA-VPE	TAS3B-5'D2[-]:GAMMA-VPE	0.999995
AT4G33080.2	TAS1C-3'D2[-]	339	6	0.17278	0.925345	no	NA	TAS1C-3'D2[-]:AT4G33080.2	0.999995
AT4G33430.2	TAS2-3'D1[-]	2125	5	0.410009	1.03628	no	ATBAK1	TAS2-3'D1[-]:ATBAK1	0.999995
AT4G33530.1	TAS3C-5'D2[+]	2143	6	0.111073	0.372144	no	KUP5	TAS3C-5'D2[+]:KUP5	0.999995
AT4G33790.1	TAS3C-5'D8[-]	1417	5.5	0.133013	0.532979	no	CER4	TAS3C-5'D8[-]:CER4	0.999995
AT4G33920.1	TAS3C-5'D3[+]	1160	6	0.135756	0.237237	no	NA	TAS3C-5'D3[+]:AT4G33920.1	0.999995
AT4G34960.1	TAS4-3'D9[+]	621	5.5	0.120672	0.842309	no	NA	TAS4-3'D9[+]:AT4G34960.1	0.999995
AT4G34960.1	TAS2-3'D8[-]	876	6	0.226259	0.530949	no	NA	TAS2-3'D8[-]:AT4G34960.1	0.999995
AT4G35010.1	TAS1C-3'D5[-]	2111	6	0.124785	0.898166	no	BGAL11	TAS1C-3'D5[-]:BGAL11	0.999995
AT4G35110.4	TAS1B-3'D4[-]	1131	5.5	0.123414	0.311355	no	NA	TAS1B-3'D4[-]:AT4G35110.4	0.999995
AT4G35190.1	TAS3C-5'D2[+]	13	6	0.134384	1.00853	no	LOG5	TAS3C-5'D2[+]:LOG5	0.999995
AT4G36360.2	TAS2-3'D7[+]	356	6	0.124785	0.865014	no	BGAL3	TAS2-3'D7[+]:BGAL3	0.999995
AT4G36470.1	TAS3C-5'D6[+]	928	6	0.628041	0.582771	no	NA	TAS3C-5'D6[+]:AT4G36470.1	0.999995
AT4G36648.1	TAS1A-3'D2[-]	1908	6	0.123414	0.887355	no	NA	TAS1A-3'D2[-]:AT4G36648.1	0.999995
AT4G36730.2	TAS2-3'D1[-]	1135	5	11.2855	0.100636	no	AtGBF1	TAS2-3'D1[-]:AtGBF1	0.999995
AT4G37510.1	TAS3C-5'D1[+]	1198	6	0.141241	0.719162	no	NA	TAS3C-5'D1[+]:AT4G37510.1	0.999995
AT4G37820.1	TAS3C-5'D3[+]	1734	5	0.156325	0.897792	no	NA	TAS3C-5'D3[+]:AT4G37820.1	0.999995
AT4G38430.1	TAS1A-3'D9[-]	1755	5	1.03119	0.670172	no	ATROPGEF1	TAS1A-3'D9[-]:ATROPGEF1	0.999995
AT4G39040.2	TAS3B-5'D7[+]	276	6	0.16181	0.567767	no	NA	TAS3B-5'D7[+]:AT4G39040.2	0.999995
AT4G39040.2	TAS3C-5'D3[+]	330	5.5	0.160438	0.679037	no	NA	TAS3C-5'D3[+]:AT4G39040.2	0.999995
AT4G39480.1	TAS3A-5'D4[-]	1539	6	0.234487	0.45007	no	CYP96A9	TAS3A-5'D4[-]:CYP96A9	0.999995
AT4G39520.1	TAS3B-5'D7[+]	592	5	0.381213	0.908866	no	NA	TAS3B-5'D7[+]:AT4G39520.1	0.999995
AT4G40030.3	TAS3C-5'D9[-]	826	5	0.252313	0.668925	no	NA	TAS3C-5'D9[-]:AT4G40030.3	0.999995
AT5G01290.1	TAS1A-3'D8[+]	1628	6	0.13027	0.974003	no	NA	TAS1A-3'D8[+]:AT5G01290.1	0.999995
AT5G01410.1	TAS1C-3'D7[-]	1134	4.5	0.115187	0.956484	no	ATPDX1	TAS1C-3'D7[-]:ATPDX1	0.999995
AT5G01410.1	TAS4-3'D6[+]	694	6	0.142612	0.6925	no	ATPDX1	TAS4-3'D6[+]:ATPDX1	0.999995
AT5G01820.1	TAS1A-3'D7[-]	1309	5.5	7.8272	0.746411	no	ATCIPK14	TAS1A-3'D7[-]:ATCIPK14	0.999995
AT5G01980.1	TAS4-3'D1[+]	772	5.5	0.28111	1.01742	no	NA	TAS4-3'D1[+]:AT5G01980.1	0.999995
AT5G02120.1	TAS2-3'D5[+]	339	6	0.133013	0.881569	no	OHP	TAS2-3'D5[+]:OHP	0.999995
AT5G02590.1	TAS3C-5'D1[+]	695	5.5	0.122043	0.992721	no	NA	TAS3C-5'D1[+]:AT5G02590.1	0.999995
AT5G02860.1	TAS3A-5'D9[+]	1231	5.5	0.156325	0.990602	no	NA	TAS3A-5'D9[+]:AT5G02860.1	0.999995
AT5G03650.1	TAS3C-5'D8[-]	358	6	0.127528	0.979744	no	SBE2.2	TAS3C-5'D8[-]:SBE2.2	0.999995
AT5G04290.1	TAS3C-5'D8[-]	2733	5.5	0.304422	1.0182	no	KTF1	TAS3C-5'D8[-]:KTF1	0.999995
AT5G04600.1	TAS3B-5'D9[+]	623	5.5	2.53822	0.369703	no	NA	TAS3B-5'D9[+]:AT5G04600.1	0.999995
AT5G06980.4	TAS3C-5'D3[+]	177	5	0.300308	0.483002	no	NA	TAS3C-5'D3[+]:AT5G06980.4	0.999995
AT5G07180.1	TAS3C-5'D10[-]	2709	6	0.375727	0.889998	no	ERL2	TAS3C-5'D10[-]:ERL2	0.999995
AT5G07530.2	TAS3B-5'D6[+]	635	5.5	1.02434	0.216769	no	ATGRP-7	TAS3B-5'D6[+]:ATGRP-7	0.999995
AT5G07790.2	TAS3B-5'D7[+]	1502	6	0.148097	0.738805	no	NA	TAS3B-5'D7[+]:AT5G07790.2	0.999995
AT5G09670.2	TAS1C-3'D6[-]	1386	5	0.311278	0.77665	no	NA	TAS1C-3'D6[-]:AT5G09670.2	0.999995
AT5G09672.1	TAS1C-3'D6[-]	1386	5	0.311278	0.77665	no	CPuORF21	TAS1C-3'D6[-]:CPuORF21	0.999995
AT5G09810.1	TAS1C-3'D5[+]	1319	5.5	0.242714	0.139375	no	ACT7	TAS1C-3'D5[+]:ACT7	0.999995
AT5G10140.4	TAS3B-5'D3[+]	311	5.5	0.133013	0.995182	no	AGL25	TAS3B-5'D3[+]:AGL25	0.999995
AT5G10200.1	TAS3B-5'D7[+]	1583	5	0.124785	0.830843	no	NA	TAS3B-5'D7[+]:AT5G10200.1	0.999995
AT5G10730.1	TAS3B-5'D5[+]	862	6	0.122043	0.567737	no	NA	TAS3B-5'D5[+]:AT5G10730.1	0.999995
AT5G11560.1	TAS3B-5'D6[-]	2384	5	0.133013	0.985685	no	NA	TAS3B-5'D6[-]:AT5G11560.1	0.999995
AT5G11890.1	TAS3B-5'D7[+]	834	6	0.104216	0.266794	no	EMB3135	TAS3B-5'D7[+]:EMB3135	0.999995
AT5G12400.1	TAS3A-5'D6[+]	25	6	0.17278	1.0414	no	NA	TAS3A-5'D6[+]:AT5G12400.1	0.999995
AT5G13020.1	TAS3A-5'D1[+]	1359	5	0.137127	0.724711	no	AtEML3	TAS3A-5'D1[+]:AtEML3	0.999995
AT5G13400.1	TAS1A-3'D9[-]	1750	6	0.134384	0.767215	no	NA	TAS1A-3'D9[-]:AT5G13400.1	0.999995
AT5G13420.1	TAS3B-5'D7[+]	1329	5.5	0.137127	1.01344	no	TRA2	TAS3B-5'D7[+]:TRA2	0.999995
AT5G13460.1	TAS3C-5'D3[+]	1024	6	0.10833	0.417001	no	IQD11	TAS3C-5'D3[+]:IQD11	0.999995
AT5G13460.1	TAS4-3'D9[+]	985	5.5	0.112444	0.579361	no	IQD11	TAS4-3'D9[+]:IQD11	0.999995
AT5G14370.1	TAS3B-5'D7[+]	373	4.5	0.2482	0.683757	no	NA	TAS3B-5'D7[+]:AT5G14370.1	0.999995
AT5G14770.1	TAS2-3'D6[-]	2681	6	0.131642	1.13164	no	NA	TAS2-3'D6[-]:AT5G14770.1	0.999995
AT5G14920.2	TAS2-3'D8[+]	1075	4.5	0.410009	0.092834	no	NA	TAS2-3'D8[+]:AT5G14920.2	0.999995
AT5G15470.1	TAS3B-5'D5[+]	412	5	0.156325	0.836351	no	GAUT14	TAS3B-5'D5[+]:GAUT14	0.999995
AT5G15980.1	TAS4-3'D9[+]	734	5.5	0.131642	0.808871	no	NA	TAS4-3'D9[+]:AT5G15980.1	0.999995
AT5G16260.1	TAS3B-5'D7[+]	1456	5	0.128899	0.985633	no	ELF9	TAS3B-5'D7[+]:ELF9	0.999995
AT5G16510.2	TAS2-3'D7[+]	977	5.5	0.304422	0.930546	no	RGP5	TAS2-3'D7[+]:RGP5	0.999995
AT5G16780.1	TAS3B-5'D7[+]	571	4	2.01714	0.494856	no	DOT2	TAS3B-5'D7[+]:DOT2	0.999995
AT5G16780.1	TAS3B-5'D9[+]	602	5	0.563591	0.256453	no	DOT2	TAS3B-5'D9[+]:DOT2	0.999995
AT5G17760.2	TAS3B-5'D7[+]	1727	6	0.117929	0.847234	no	NA	TAS3B-5'D7[+]:AT5G17760.2	0.999995
AT5G17760.2	TAS3A-5'D1[+]	557	6	0.124785	0.859576	no	NA	TAS3A-5'D1[+]:AT5G17760.2	0.999995
AT5G17900.1	TAS3C-5'D8[-]	838	6	0.268769	0.87021	no	NA	TAS3C-5'D8[-]:AT5G17900.1	0.999995
AT5G17910.2	TAS3C-5'D9[+]	573	6	0.13027	0.925863	no	NA	TAS3C-5'D9[+]:AT5G17910.2	0.999995
AT5G18000.1	TAS2-3'D4[-]	908	5.5	0.131642	0.790281	no	VDD	TAS2-3'D4[-]:VDD	0.999995
AT5G18520.1	TAS4-3'D9[+]	1334	6	0.120672	0.656295	no	Cand7	TAS4-3'D9[+]:Cand7	0.999995
AT5G20220.2	TAS2-3'D2[-]	1327	6	0.286595	0.722148	no	NA	TAS2-3'D2[-]:AT5G20220.2	0.999995
AT5G21040.2	TAS1A-3'D5[+]	297	6	0.137127	0.804122	no	FBX2	TAS1A-3'D5[+]:FBX2	0.999995
AT5G21100.1	TAS1A-3'D3[-]	1942	6	0.385326	1.00198	no	NA	TAS1A-3'D3[-]:AT5G21100.1	0.999995
AT5G22000.3	TAS3A-5'D6[+]	1212	4	0.134384	0.604605	no	RHF2A	TAS3A-5'D6[+]:RHF2A	0.999995
AT5G22000.3	TAS1A-3'D7[-]	1391	6	0.148097	0.671277	no	RHF2A	TAS1A-3'D7[-]:RHF2A	0.999995
AT5G22310.1	TAS3C-5'D3[+]	1187	6	0.157696	0.892207	no	NA	TAS3C-5'D3[+]:AT5G22310.1	0.999995
AT5G22400.1	TAS1C-3'D7[+]	815	6	0.143983	1.0012	no	NA	TAS1C-3'D7[+]:AT5G22400.1	0.999995
AT5G22580.1	TAS3C-5'D3[+]	170	6	0.149468	0.766751	no	NA	TAS3C-5'D3[+]:AT5G22580.1	0.999995
AT5G23750.2	TAS3A-5'D9[+]	466	6	0.157696	0.602498	no	NA	TAS3A-5'D9[+]:AT5G23750.2	0.999995
AT5G23890.1	TAS3C-5'D8[-]	2592	6	0.113815	0.61383	no	NA	TAS3C-5'D8[-]:AT5G23890.1	0.999995
AT5G24670.2	TAS3B-5'D7[-]	1257	5.5	0.128899	1.1289	no	EMB2820	TAS3B-5'D7[-]:EMB2820	0.999995
AT5G24860.1	TAS3C-5'D6[-]	424	5.5	0.21666	0.524922	no	ATFPF1	TAS3C-5'D6[-]:ATFPF1	0.999995
AT5G24880.1	TAS4-3'D9[+]	1129	5	0.113815	0.990247	no	NA	TAS4-3'D9[+]:AT5G24880.1	0.999995
AT5G26000.2	TAS3C-5'D2[+]	823	5.5	0.703461	0.206174	no	AtTGG1	TAS3C-5'D2[+]:AtTGG1	0.999995
AT5G26742.3	TAS3B-5'D8[+]	1802	5.5	0.470345	0.848803	no	AtRH3	TAS3B-5'D8[+]:AtRH3	0.999995
AT5G27440.1	TAS1B-3'D4[-]	358	5	0.178265	0.904236	no	NA	TAS1B-3'D4[-]:AT5G27440.1	0.999995
AT5G27720.1	TAS3C-5'D6[+]	219	4.5	0.252313	0.767921	no	emb1644	TAS3C-5'D6[+]:emb1644	0.999995
AT5G27930.2	TAS2-3'D4[-]	325	5	0.399039	1.10148	no	NA	TAS2-3'D4[-]:AT5G27930.2	0.999995
AT5G28237.1	TAS2-3'D3[+]	768	4.5	0.13027	0.968281	no	NA	TAS2-3'D3[+]:AT5G28237.1	0.999995
AT5G28640.1	TAS2-3'D3[-]	988	5	0.1193	0.991497	no	AN3	TAS2-3'D3[-]:AN3	0.999995
AT5G29075.1	TAS3B-5'D9[+]	3565	6	0.00274254	0.9799	no	NA	TAS3B-5'D9[+]:AT5G29075.1	0.999995
AT5G30495.2	TAS3B-5'D7[+]	589	5.5	0.282481	0.664594	no	NA	TAS3B-5'D7[+]:AT5G30495.2	0.999995
AT5G37130.1	TAS1A-3'D9[-]	2607	5.5	0.444291	0.996217	no	NA	TAS1A-3'D9[-]:AT5G37130.1	0.999995
AT5G37370.4	TAS3B-5'D7[+]	953	5.5	0.566334	0.887357	no	ATSRL1	TAS3B-5'D7[+]:ATSRL1	0.999995
AT5G37710.1	TAS1A-3'D9[-]	1005	4.5	0.126157	0.991548	no	NA	TAS1A-3'D9[-]:AT5G37710.1	0.999995
AT5G38410.3	TAS3C-5'D8[-]	100	4.5	0.135756	0.811812	no	RBCS3B	TAS3C-5'D8[-]:RBCS3B	0.999995
AT5G40340.1	TAS3B-5'D7[+]	2199	5.5	0.272882	0.707913	no	NA	TAS3B-5'D7[+]:AT5G40340.1	0.999995
AT5G41790.1	TAS1C-3'D5[-]	3243	6	0.27014	0.98932	no	CIP1	TAS1C-3'D5[-]:CIP1	0.999995
AT5G42390.1	TAS2-3'D6[-]	1135	5	0.109701	0.880337	no	SPP	TAS2-3'D6[-]:SPP	0.999995
AT5G42390.1	TAS2-3'D3[+]	1651	6	0.0740485	0.947958	no	SPP	TAS2-3'D3[+]:SPP	0.999995
AT5G42630.2	TAS3C-5'D3[+]	652	6	0.117929	0.867057	no	ATS	TAS3C-5'D3[+]:ATS	0.999995
AT5G42950.1	TAS3B-5'D9[+]	5046	6	0.276996	0.976921	no	NA	TAS3B-5'D9[+]:AT5G42950.1	0.999995
AT5G43130.2	TAS3C-5'D8[-]	1609	6	0.412752	0.487289	no	TAF4	TAS3C-5'D8[-]:TAF4	0.999995
AT5G43880.1	TAS3C-5'D2[+]	2471	6	0.29208	0.581188	no	TRM21	TAS3C-5'D2[+]:TRM21	0.999995
AT5G44870.1	TAS3C-5'D7[-]	1527	5	0.120672	0.993919	no	LAZ5	TAS3C-5'D7[-]:LAZ5	0.999995
AT5G45190.2	TAS3C-5'D3[+]	1658	5.5	0.139869	0.708502	no	NA	TAS3C-5'D3[+]:AT5G45190.2	0.999995
AT5G45250.1	TAS3C-5'D8[-]	3345	5	0.137127	0.640719	no	RPS4	TAS3C-5'D8[-]:RPS4	0.999995
AT5G46570.1	TAS3C-5'D10[+]	1509	6	0.157696	0.803092	no	BSK2	TAS3C-5'D10[+]:BSK2	0.999995
AT5G46730.2	TAS4-3'D2[-]	597	4	0.181007	0.702345	no	NA	TAS4-3'D2[-]:AT5G46730.2	0.999995
AT5G46840.2	TAS3A-5'D9[+]	189	6	0.399039	1.01492	no	NA	TAS3A-5'D9[+]:AT5G46840.2	0.999995
AT5G47140.1	TAS1A-3'D3[-]	1276	5	0.137127	0.804902	no	GATA27	TAS1A-3'D3[-]:GATA27	0.999995
AT5G47530.1	TAS1B-3'D10[-]	989	6	0.124785	1.12478	no	NA	TAS1B-3'D10[-]:AT5G47530.1	0.999995
AT5G48180.1	TAS1B-3'D7[-]	657	5.5	0.841959	0.836786	no	AtNSP5	TAS1B-3'D7[-]:AtNSP5	0.999995
AT5G48880.3	TAS2-3'D8[+]	424	6	0.282481	0.697298	no	KAT5	TAS2-3'D8[+]:KAT5	0.999995
AT5G48970.1	TAS3A-5'D2[-]	1260	5.5	0.4868	1.02457	no	NA	TAS3A-5'D2[-]:AT5G48970.1	0.999995
AT5G49510.2	TAS1C-3'D9[-]	414	5.5	0.134384	0.883578	no	PFD3	TAS1C-3'D9[-]:PFD3	0.999995
AT5G51180.2	TAS1A-3'D3[-]	355	6	0.120672	0.837133	no	NA	TAS1A-3'D3[-]:AT5G51180.2	0.999995
AT5G51410.3	TAS3B-5'D9[+]	1065	6	0.154953	0.61199	no	NA	TAS3B-5'D9[+]:AT5G51410.3	0.999995
AT5G51750.1	TAS2-3'D5[-]	928	5	0.133013	0.718323	no	ATSBT1.3	TAS2-3'D5[-]:ATSBT1.3	0.999995
AT5G52010.1	TAS3C-5'D8[-]	708	6	0.153582	0.783835	no	NA	TAS3C-5'D8[-]:AT5G52010.1	0.999995
AT5G52040.4	TAS3C-5'D3[+]	1445	6	0.447033	1.0203	no	At-RS41	TAS3C-5'D3[+]:At-RS41	0.999995
AT5G52470.2	TAS1A-3'D9[-]	188	6	0.174151	0.869069	no	ATFBR1	TAS1A-3'D9[-]:ATFBR1	0.999995
AT5G52920.1	TAS3C-5'D4[+]	629	6	0.139869	0.522717	no	PKP-BETA1	TAS3C-5'D4[+]:PKP-BETA1	0.999995
AT5G54130.4	TAS3C-5'D6[+]	1357	6	0.10833	0.674526	no	NA	TAS3C-5'D6[+]:AT5G54130.4	0.999995
AT5G55220.1	TAS1B-3'D4[-]	185	6	0.168666	0.953034	no	NA	TAS1B-3'D4[-]:AT5G55220.1	0.999995
AT5G56300.1	TAS1A-3'D9[-]	586	5.5	0.309907	0.928104	no	GAMT2	TAS1A-3'D9[-]:GAMT2	0.999995
AT5G56850.2	TAS3B-5'D10[+]	421	5.5	0.154953	0.765508	no	NA	TAS3B-5'D10[+]:AT5G56850.2	0.999995
AT5G57370.1	TAS3C-5'D7[+]	890	6	0.349673	0.923095	no	NA	TAS3C-5'D7[+]:AT5G57370.1	0.999995
AT5G57710.1	TAS3B-5'D7[+]	3022	6	1.57559	0.957682	no	NA	TAS3B-5'D7[+]:AT5G57710.1	0.999995
AT5G57950.1	TAS3C-5'D3[+]	49	6	0.404524	0.975244	no	NA	TAS3C-5'D3[+]:AT5G57950.1	0.999995
AT5G58575.1	TAS3A-5'D7[-]	200	5.5	0.111073	0.958593	no	NA	TAS3A-5'D7[-]:AT5G58575.1	0.999995
AT5G58590.1	TAS3C-5'D3[+]	711	6	0.0164552	0.89388	no	RANBP1	TAS3C-5'D3[+]:RANBP1	0.999995
AT5G60030.1	TAS3B-5'D7[+]	729	5.5	0.149468	0.518318	no	NA	TAS3B-5'D7[+]:AT5G60030.1	0.999995
AT5G60548.1	TAS3C-5'D3[+]	645	5	0.153582	0.619364	no	CPuORF62	TAS3C-5'D3[+]:CPuORF62	0.999995
AT5G60550.1	TAS3C-5'D3[+]	645	5	0.153582	0.619364	no	ATSNAK1	TAS3C-5'D3[+]:ATSNAK1	0.999995
AT5G61140.2	TAS1B-3'D5[-]	1208	6	0.117929	0.824944	no	NA	TAS1B-3'D5[-]:AT5G61140.2	0.999995
AT5G61228.1	TAS3A-5'D1[-]	274	4.5	0.141241	0.814933	no	CPuORF15	TAS3A-5'D1[-]:CPuORF15	0.999995
AT5G61230.1	TAS3A-5'D1[-]	274	4.5	0.141241	0.814933	no	ANK6	TAS3A-5'D1[-]:ANK6	0.999995
AT5G61480.1	TAS1A-3'D8[-]	3076	5.5	0.149468	0.458249	no	PXY	TAS1A-3'D8[-]:PXY	0.999995
AT5G61820.1	TAS1C-3'D5[-]	1236	6	0.152211	0.836694	no	NA	TAS1C-3'D5[-]:AT5G61820.1	0.999995
AT5G61920.2	TAS3B-5'D1[+]	779	6	0.266026	0.849943	no	NA	TAS3B-5'D1[+]:AT5G61920.2	0.999995
AT5G62000.4	TAS1B-3'D10[+]	3081	5	3.80664	0.58176	no	ARF1-BP	TAS1B-3'D10[+]:ARF1-BP	0.999995
AT5G62030.1	TAS3C-5'D6[-]	1722	5.5	0.124785	0.857778	no	NA	TAS3C-5'D6[-]:AT5G62030.1	0.999995
AT5G62390.1	TAS3C-5'D3[+]	850	4.5	0.156325	0.394365	no	ATBAG7	TAS3C-5'D3[+]:ATBAG7	0.999995
AT5G62410.1	TAS3C-5'D2[+]	866	5.5	0.141241	0.995217	no	ATCAP-E1	TAS3C-5'D2[+]:ATCAP-E1	0.999995
AT5G63310.1	TAS3C-5'D8[-]	19	6	0.115187	0.95761	no	ATNDPK2	TAS3C-5'D8[-]:ATNDPK2	0.999995
AT5G63580.1	TAS3C-5'D2[+]	733	5.5	0.294823	1.11449	no	ATFLS2	TAS3C-5'D2[+]:ATFLS2	0.999995
AT5G63810.1	TAS1A-3'D7[-]	2150	6	0.419608	1.06152	no	AtBGAL10	TAS1A-3'D7[-]:AtBGAL10	0.999995
AT5G63870.3	TAS1C-3'D5[-]	947	5.5	0.13027	0.726692	no	ATPP7	TAS1C-3'D5[-]:ATPP7	0.999995
AT5G64610.1	TAS2-3'D4[-]	1456	5.5	0.45389	1.11225	no	HAM1	TAS2-3'D4[-]:HAM1	0.999995
AT5G64630.3	TAS4-3'D9[+]	1219	6	0.135756	0.941997	no	FAS2	TAS4-3'D9[+]:FAS2	0.999995
AT5G65750.1	TAS2-3'D4[-]	998	6	0.134384	0.995188	no	NA	TAS2-3'D4[-]:AT5G65750.1	0.999995
AT5G66050.2	TAS1C-3'D8[-]	1593	4.5	0.289338	0.917094	no	NA	TAS1C-3'D8[-]:AT5G66050.2	0.999995
AT5G66540.1	TAS3A-5'D1[+]	594	5.5	0.235858	1.07132	no	NA	TAS3A-5'D1[+]:AT5G66540.1	0.999995
AT5G66760.1	TAS1C-3'D5[-]	1777	6	0.383955	0.453341	no	SDH1-1	TAS1C-3'D5[-]:SDH1-1	0.999995
AT5G67070.1	TAS3A-5'D4[-]	137	5	0.137127	0.889515	no	RALFL34	TAS3A-5'D4[-]:RALFL34	0.999995
AT5G67250.1	TAS1A-3'D7[-]	47	6	0.1193	0.762673	no	SKIP2	TAS1A-3'D7[-]:SKIP2	0.999995
AT5G67370.1	TAS3A-5'D7[+]	714	6	0.0699347	0.580436	no	CGLD27	TAS3A-5'D7[+]:CGLD27	0.999995
AT5G67380.2	TAS3B-5'D3[-]	219	4.5	0.560849	0.586955	no	ATCKA1	TAS3B-5'D3[-]:ATCKA1	0.999995
ATCG00830.1	TAS3B-5'D9[+]	771	4.5	1.44806	0.97755	no	RPL2.1	TAS3B-5'D9[+]:RPL2.1	0.999995
ATCG01130.1	TAS3C-5'D4[+]	4586	6	0.241343	0.438326	no	YCF1.2	TAS3C-5'D4[+]:YCF1.2	0.999995

## Sheet: SRX384362
Target transcript	tasiRNA	tasiRNA slice site position in target transcript	Allen score of sRNA:target duplex	Slice site RPM	Slice site RPM + 1/Maximum adjacent site RPM + 1	Previously verified by 5' RACE?	Target gene common name	Interaction name	P-value adjusted for multiple testing
AT2G27400.1	TAS1B-3'D6[-]	450	1.5	0.784619	0.888401	no	TAS1a	TAS1B-3'D6[-]:TAS1a	0
AT2G33860.1	TAS3A-5'D7[+]	1684	1.5	0.448354	1.44835	yes	ARF3	TAS3A-5'D7[+]:ARF3	0
AT5G62000.4	TAS3A-5'D7[+]	1745	1.5	5.38024	3.74625	yes	ARF1-BP	TAS3A-5'D7[+]:ARF1-BP	0
AT3G17185.2	TAS3B-5'D8[-]	705	1	0.804999	1.0473	no	TAS3a	TAS3B-5'D8[-]:TAS3a	0.230545
AT2G05920.1	TAS3C-5'D3[+]	2460	3	1.73228	0.899377	no	NA	TAS3C-5'D3[+]:AT2G05920.1	0.452992
AT4G24000.1	TAS3B-5'D7[+]	706	5	3.77025	2.052	no	ATCSLG2	TAS3B-5'D7[+]:ATCSLG2	0.49259
AT4G27240.1	TAS3B-5'D7[+]	176	4	1.66095	1.59097	no	NA	TAS3B-5'D7[+]:AT4G27240.1	0.49259
AT5G01730.1	TAS1A-3'D1[-]	3509	5	1.14126	2.14126	no	ATSCAR4	TAS1A-3'D1[-]:ATSCAR4	0.49259
AT2G23150.1	TAS2-3'D1[+]	630	3.5	0.927277	1.11825	no	ATNRAMP3	TAS2-3'D1[+]:ATNRAMP3	0.625017
AT5G40450.1	TAS3A-5'D1[+]	6543	3	1.61	0.836675	no	NA	TAS3A-5'D1[+]:AT5G40450.1	0.625017
AT3G55750.1	TAS3C-5'D9[-]	22	6	7.20423	3.36685	no	NA	TAS3C-5'D9[-]:AT3G55750.1	0.84236
AT1G01240.3	TAS2-3'D7[+]	1693	5	2.59841	0.673749	no	NA	TAS2-3'D7[+]:AT1G01240.3	0.999668
AT1G01260.3	TAS3C-5'D1[+]	1817	5.5	1.15145	0.954778	no	NA	TAS3C-5'D1[+]:AT1G01260.3	0.999668
AT1G07280.3	TAS3C-5'D8[+]	1931	5	0.356645	1.35665	no	NA	TAS3C-5'D8[+]:AT1G07280.3	0.999668
AT1G07430.1	TAS1A-3'D7[-]	572	6	1.1005	0.630122	no	AIP1	TAS1A-3'D7[-]:AIP1	0.999668
AT1G08510.1	TAS3B-5'D7[+]	1537	4.5	0.366835	0.366357	no	FATB	TAS3B-5'D7[+]:FATB	0.999668
AT1G11680.1	TAS3C-5'D2[+]	994	5.5	1.48772	0.630622	no	CYP51	TAS3C-5'D2[+]:CYP51	0.999668
AT1G11750.2	TAS3A-5'D4[-]	167	6	0.244557	0.542501	no	CLPP6	TAS3A-5'D4[-]:CLPP6	0.999668
AT1G12080.2	TAS3C-5'D8[-]	300	6	2.59841	0.382955	no	NA	TAS3C-5'D8[-]:AT1G12080.2	0.999668
AT1G17210.1	TAS1A-3'D7[-]	1465	5.5	0.68272	0.785855	no	ATILP1	TAS1A-3'D7[-]:ATILP1	0.999668
AT1G21780.2	TAS1A-3'D7[+]	337	6	3.0162	1.38714	no	NA	TAS1A-3'D7[+]:AT1G21780.2	0.999668
AT1G22640.1	TAS2-3'D9[+]	476	5.5	0.855948	0.0790478	no	ATMYB3	TAS2-3'D9[+]:ATMYB3	0.999668
AT1G26160.1	TAS1A-3'D9[-]	749	6	1.15145	1.46483	no	NA	TAS1A-3'D9[-]:AT1G26160.1	0.999668
AT1G28190.1	TAS3B-5'D7[+]	652	6	0.468733	0.731149	no	NA	TAS3B-5'D7[+]:AT1G28190.1	0.999668
AT1G28320.1	TAS3A-5'D4[+]	1223	6	1.27373	0.432321	no	DEG15	TAS3A-5'D4[+]:DEG15	0.999668
AT1G28440.1	TAS3B-5'D3[+]	2556	5.5	0.896707	0.413512	no	HSL1	TAS3B-5'D3[+]:HSL1	0.999668
AT1G32130.2	TAS4-3'D2[-]	278	5	0.621581	0.673918	no	ATIWS1	TAS4-3'D2[-]:ATIWS1	0.999668
AT1G32530.1	TAS4-3'D9[+]	1096	6	0.784619	0.802877	no	NA	TAS4-3'D9[+]:AT1G32530.1	0.999668
AT1G32700.2	TAS3A-5'D4[+]	1209	5	0.69291	0.267903	no	NA	TAS3A-5'D4[+]:AT1G32700.2	0.999668
AT1G53450.2	TAS4-3'D1[+]	1651	6	0.886518	0.490901	no	NA	TAS4-3'D1[+]:AT1G53450.2	0.999668
AT1G64200.1	TAS3B-5'D7[+]	157	5.5	0.774429	0.861478	no	VHA-E3	TAS3B-5'D7[+]:VHA-E3	0.999668
AT1G67140.3	TAS3C-5'D3[+]	6105	5.5	0.0203797	0.250883	no	SWEETIE	TAS3C-5'D3[+]:SWEETIE	0.999668
AT1G68560.1	TAS1A-3'D7[+]	2201	5.5	2.2112	0.30741	no	ATXYL1	TAS1A-3'D7[+]:ATXYL1	0.999668
AT1G72150.1	TAS3C-5'D2[+]	114	6	0.784619	0.55399	no	PATL1	TAS3C-5'D2[+]:PATL1	0.999668
AT1G72260.1	TAS2-3'D3[+]	140	6	2.89392	0.704871	no	THI2.1	TAS2-3'D3[+]:THI2.1	0.999668
AT1G73590.1	TAS3C-5'D1[+]	1345	5	0.448354	0.776124	no	ATPIN1	TAS3C-5'D1[+]:ATPIN1	0.999668
AT1G73760.1	TAS4-3'D4[+]	1036	6	2.38443	1.23868	no	NA	TAS4-3'D4[+]:AT1G73760.1	0.999668
AT1G74720.1	TAS4-3'D4[+]	1939	5.5	2.54746	1.46192	no	QKY	TAS4-3'D4[+]:QKY	0.999668
AT1G75270.1	TAS1C-3'D9[+]	199	6	0.336265	0.388972	no	DHAR2	TAS1C-3'D9[+]:DHAR2	0.999668
AT1G75940.1	TAS2-3'D3[+]	1613	6	4.47335	1.67784	no	ATA27	TAS2-3'D3[+]:ATA27	0.999668
AT1G77420.1	TAS3B-5'D5[-]	1340	6	0.845758	0.853869	no	NA	TAS3B-5'D5[-]:AT1G77420.1	0.999668
AT2G02090.1	TAS3A-5'D1[+]	612	6	0.641961	1.64196	no	CHA19	TAS3A-5'D1[+]:CHA19	0.999668
AT2G07718.1	TAS4-3'D3[+]	811	5	0.224177	0.265709	no	NA	TAS4-3'D3[+]:AT2G07718.1	0.999668
AT2G14680.3	TAS1C-3'D7[-]	981	4.5	0.621581	0.55422	no	MEE13	TAS1C-3'D7[-]:MEE13	0.999668
AT2G14750.1	TAS1C-3'D6[+]	609	5	0.825378	0.691282	no	AKN1	TAS1C-3'D6[+]:AKN1	0.999668
AT2G18630.1	TAS4-3'D6[+]	1579	6	1.29411	1.06631	no	NA	TAS4-3'D6[+]:AT2G18630.1	0.999668
AT2G21860.1	TAS3C-5'D2[+]	197	6	0.764239	0.915405	no	NA	TAS3C-5'D2[+]:AT2G21860.1	0.999668
AT2G22080.1	TAS3B-5'D9[+]	441	5.5	0.804999	1.0792	no	NA	TAS3B-5'D9[+]:AT2G22080.1	0.999668
AT2G22430.1	TAS3C-5'D9[-]	1209	6	1.02918	0.679333	no	ATHB6	TAS3C-5'D9[-]:ATHB6	0.999668
AT2G22795.1	TAS3C-5'D3[+]	814	6	1.36544	0.464147	no	NA	TAS3C-5'D3[+]:AT2G22795.1	0.999668
AT2G25900.2	TAS2-3'D8[-]	709	5.5	1.56924	0.450135	no	ATCTH	TAS2-3'D8[-]:ATCTH	0.999668
AT2G27170.2	TAS4-3'D3[-]	1708	5.5	0.72348	0.994122	no	SMC3	TAS4-3'D3[-]:SMC3	0.999668
AT2G27510.1	TAS3A-5'D7[+]	268	6	0.580822	0.460159	no	ATFD3	TAS3A-5'D7[+]:ATFD3	0.999668
AT2G28910.1	TAS3B-5'D7[+]	809	6	1.56924	0.482894	no	CXIP4	TAS3B-5'D7[+]:CXIP4	0.999668
AT2G28910.1	TAS1B-3'D3[+]	947	5.5	0.815189	0.184	no	CXIP4	TAS1B-3'D3[+]:CXIP4	0.999668
AT2G30570.1	TAS3B-5'D7[+]	263	6	0.835568	0.625179	no	PSBW	TAS3B-5'D7[+]:PSBW	0.999668
AT2G36800.1	TAS1B-3'D4[-]	674	5.5	0.641961	0.536878	no	DOGT1	TAS1B-3'D4[-]:DOGT1	0.999668
AT2G40205.1	TAS3B-5'D9[-]	105	4	0.621581	0.262543	no	NA	TAS3B-5'D9[-]:AT2G40205.1	0.999668
AT2G41905.1	TAS4-3'D9[+]	92	6	0.427974	0.165034	no	NA	TAS4-3'D9[+]:AT2G41905.1	0.999668
AT2G43235.1	TAS3B-5'D6[+]	1188	5.5	0.356645	0.114464	no	NA	TAS3B-5'D6[+]:AT2G43235.1	0.999668
AT2G45070.4	TAS3C-5'D8[-]	201	5.5	0.988416	1.12059	no	SEC61 BETA	TAS3C-5'D8[-]:SEC61 BETA	0.999668
AT3G04350.1	TAS1A-3'D7[-]	776	6	1.11069	1.02473	no	NA	TAS1A-3'D7[-]:AT3G04350.1	0.999668
AT3G04920.1	TAS3B-5'D8[+]	253	6	1.0088	0.325235	no	NA	TAS3B-5'D8[+]:AT3G04920.1	0.999668
AT3G05030.2	TAS4-3'D6[+]	671	6	0.427974	0.795613	no	ATNHX2	TAS4-3'D6[+]:ATNHX2	0.999668
AT3G05060.1	TAS3C-5'D3[+]	1690	6	1.01899	0.773559	no	NA	TAS3C-5'D3[+]:AT3G05060.1	0.999668
AT3G06760.2	TAS3C-5'D8[-]	858	6	1.4062	0.578572	no	NA	TAS3C-5'D8[-]:AT3G06760.2	0.999668
AT3G09735.1	TAS3C-5'D3[+]	291	5.5	1.21259	1.11847	no	NA	TAS3C-5'D3[+]:AT3G09735.1	0.999668
AT3G09980.1	TAS1B-3'D9[-]	260	5.5	0.917087	0.746169	no	NA	TAS1B-3'D9[-]:AT3G09980.1	0.999668
AT3G11500.1	TAS4-3'D9[+]	286	4	0.69291	0.555388	no	NA	TAS4-3'D9[+]:AT3G11500.1	0.999668
AT3G14810.2	TAS3B-5'D8[-]	298	5.5	0.917087	0.979181	no	MSL5	TAS3B-5'D8[-]:MSL5	0.999668
AT3G14900.1	TAS3B-5'D7[+]	1722	4.5	0.998606	0.768751	no	EMB3120	TAS3B-5'D7[+]:EMB3120	0.999668
AT3G16010.1	TAS1C-3'D6[+]	1916	6	0.927277	0.697568	no	NA	TAS1C-3'D6[+]:AT3G16010.1	0.999668
AT3G16840.1	TAS2-3'D1[-]	388	6	0.662341	0.84467	no	NA	TAS2-3'D1[-]:AT3G16840.1	0.999668
AT3G24530.1	TAS2-3'D1[+]	360	5	0.458544	0.567695	no	NA	TAS2-3'D1[+]:AT3G24530.1	0.999668
AT3G28720.1	TAS1C-3'D2[+]	1950	6	0.468733	0.486724	no	NA	TAS1C-3'D2[+]:AT3G28720.1	0.999668
AT3G47340.3	TAS3C-5'D9[-]	2225	3.5	1.66095	0.776877	no	ASN1	TAS3C-5'D9[-]:ASN1	0.999668
AT3G49060.2	TAS3B-5'D7[+]	843	5.5	0.489113	0.456482	no	NA	TAS3B-5'D7[+]:AT3G49060.2	0.999668
AT3G49910.1	TAS1C-3'D6[+]	581	5	0.611391	0.0703726	no	NA	TAS1C-3'D6[+]:AT3G49910.1	0.999668
AT3G50890.1	TAS3B-5'D7[+]	692	4.5	1.17183	1.00471	no	AtHB28	TAS3B-5'D7[+]:AtHB28	0.999668
AT3G51370.2	TAS4-3'D1[+]	396	5	0.73367	0.541601	no	NA	TAS4-3'D1[+]:AT3G51370.2	0.999668
AT3G51980.1	TAS1B-3'D8[+]	1417	5.5	0.356645	0.700216	no	NA	TAS1B-3'D8[+]:AT3G51980.1	0.999668
AT3G53990.2	TAS1C-3'D8[+]	907	5.5	0.397404	0.513357	no	NA	TAS1C-3'D8[+]:AT3G53990.2	0.999668
AT3G54080.1	TAS1A-3'D10[-]	1213	5	1.05975	0.952864	no	NA	TAS1A-3'D10[-]:AT3G54080.1	0.999668
AT3G54690.1	TAS3B-5'D10[+]	789	4	0.631771	0.542585	no	SETH3	TAS3B-5'D10[+]:SETH3	0.999668
AT3G56360.1	TAS1B-3'D4[-]	361	5	0.478923	0.400779	no	NA	TAS1B-3'D4[-]:AT3G56360.1	0.999668
AT3G57290.1	TAS3C-5'D3[-]	1503	5	0.305696	0.345255	no	ATEIF3E-1	TAS3C-5'D3[-]:ATEIF3E-1	0.999668
AT3G59020.2	TAS4-3'D9[-]	3608	6	0.611391	1.61139	no	NA	TAS4-3'D9[-]:AT3G59020.2	0.999668
AT3G59940.1	TAS4-3'D9[+]	1241	6	4.04537	0.370297	no	NA	TAS4-3'D9[+]:AT3G59940.1	0.999668
AT3G59940.1	TAS3A-5'D2[-]	1325	6	0.336265	0.164304	no	NA	TAS3A-5'D2[-]:AT3G59940.1	0.999668
AT3G60750.2	TAS3B-5'D7[+]	2144	5.5	0.519683	0.0738251	no	NA	TAS3B-5'D7[+]:AT3G60750.2	0.999668
AT3G62130.1	TAS3B-5'D9[+]	617	4.5	0.550252	0.915732	no	AtLCD	TAS3B-5'D9[+]:AtLCD	0.999668
AT3G62240.1	TAS3A-5'D2[-]	1583	6	0.601202	0.577418	no	NA	TAS3A-5'D2[-]:AT3G62240.1	0.999668
AT4G00830.4	TAS3C-5'D3[+]	475	5.5	0.0305696	0.472301	no	LIF2	TAS3C-5'D3[+]:LIF2	0.999668
AT4G01330.2	TAS1A-3'D7[-]	996	6	0.275126	0.27434	no	NA	TAS1A-3'D7[-]:AT4G01330.2	0.999668
AT4G02200.3	TAS3B-5'D7[+]	693	4.5	0.489113	0.737553	no	NA	TAS3B-5'D7[+]:AT4G02200.3	0.999668
AT4G07670.2	TAS1A-3'D7[-]	55	4.5	0.346455	0.809975	no	NA	TAS1A-3'D7[-]:AT4G07670.2	0.999668
AT4G16430.1	TAS2-3'D2[+]	1104	5	0.478923	0.287322	no	NA	TAS2-3'D2[+]:AT4G16430.1	0.999668
AT4G18480.1	TAS3B-5'D3[+]	949	4.5	0.315886	0.522532	no	CH-42	TAS3B-5'D3[+]:CH-42	0.999668
AT4G19490.2	TAS3C-5'D10[-]	1563	6	0.540062	0.915222	no	ATVPS54	TAS3C-5'D10[-]:ATVPS54	0.999668
AT4G19610.1	TAS4-3'D9[+]	1694	6	0.387215	1.38722	no	NA	TAS4-3'D9[+]:AT4G19610.1	0.999668
AT4G25620.1	TAS3C-5'D3[+]	1621	5	1.26354	0.917401	no	NA	TAS3C-5'D3[+]:AT4G25620.1	0.999668
AT4G26530.2	TAS3C-5'D10[-]	447	6	0.886518	0.784024	no	AtFBA5	TAS3C-5'D10[-]:AtFBA5	0.999668
AT4G28750.1	TAS3A-5'D7[+]	329	6	0.377025	0.352712	no	PSAE-1	TAS3A-5'D7[+]:PSAE-1	0.999668
AT4G32940.1	TAS3B-5'D2[-]	1024	3.5	1.93607	0.53444	no	GAMMA-VPE	TAS3B-5'D2[-]:GAMMA-VPE	0.999668
AT4G33430.2	TAS2-3'D1[-]	2125	5	0.672531	0.559933	no	ATBAK1	TAS2-3'D1[-]:ATBAK1	0.999668
AT4G33530.1	TAS3C-5'D2[+]	2143	6	0.438164	0.546751	no	KUP5	TAS3C-5'D2[+]:KUP5	0.999668
AT4G36730.2	TAS1B-3'D4[+]	21	5.5	0.957847	0.609693	no	AtGBF1	TAS1B-3'D4[+]:AtGBF1	0.999668
AT4G37180.2	TAS3A-5'D1[+]	1077	5.5	1.87493	0.45132	no	NA	TAS3A-5'D1[+]:AT4G37180.2	0.999668
AT4G37870.1	TAS3A-5'D4[-]	515	6	1.25335	0.830912	no	PCK1	TAS3A-5'D4[-]:PCK1	0.999668
AT5G01820.1	TAS1A-3'D7[-]	1309	5.5	1.67114	0.428233	no	ATCIPK14	TAS1A-3'D7[-]:ATCIPK14	0.999668
AT5G02120.1	TAS2-3'D5[+]	339	6	3.74987	0.580396	no	OHP	TAS2-3'D5[+]:OHP	0.999668
AT5G07360.2	TAS1A-3'D7[-]	723	6	0.957847	1.07859	no	NA	TAS1A-3'D7[-]:AT5G07360.2	0.999668
AT5G09810.1	TAS1C-3'D5[+]	1319	5.5	0.468733	0.279261	no	ACT7	TAS1C-3'D5[+]:ACT7	0.999668
AT5G17760.2	TAS3B-5'D7[+]	1727	6	1.3043	1.17086	no	NA	TAS3B-5'D7[+]:AT5G17760.2	0.999668
AT5G18670.1	TAS3A-5'D4[-]	1191	6	1.29411	0.174506	no	BAM9	TAS3A-5'D4[-]:BAM9	0.999668
AT5G19740.1	TAS1A-3'D7[-]	513	4.5	0.346455	0.809975	no	NA	TAS1A-3'D7[-]:AT5G19740.1	0.999668
AT5G23210.4	TAS3A-5'D9[+]	469	6	1.68133	1.1434	no	SCPL34	TAS3A-5'D9[+]:SCPL34	0.999668
AT5G26742.3	TAS3A-5'D7[+]	1804	6	1.21259	1.0093	no	AtRH3	TAS3A-5'D7[+]:AtRH3	0.999668
AT5G27330.1	TAS3B-5'D7[+]	771	5.5	1.02918	1.13704	no	NA	TAS3B-5'D7[+]:AT5G27330.1	0.999668
AT5G34853.1	TAS1C-3'D1[+]	3042	6	2.77164	0.743043	no	MUG8	TAS1C-3'D1[+]:MUG8	0.999668
AT5G42620.2	TAS3A-5'D2[+]	1551	6	0.968036	0.682133	no	NA	TAS3A-5'D2[+]:AT5G42620.2	0.999668
AT5G45190.2	TAS3C-5'D3[+]	1658	5.5	0.519683	0.399684	no	NA	TAS3C-5'D3[+]:AT5G45190.2	0.999668
AT5G48180.1	TAS1B-3'D7[-]	657	5.5	0.754049	0.312898	no	AtNSP5	TAS1B-3'D7[-]:AtNSP5	0.999668
AT5G58330.3	TAS3C-5'D10[-]	619	6	1.25335	0.277414	no	NA	TAS3C-5'D10[-]:AT5G58330.3	0.999668
ATCG01130.1	TAS3C-5'D4[+]	4586	6	0.244557	0.361205	no	YCF1.2	TAS3C-5'D4[+]:YCF1.2	0.999668
ATMG00590.1	TAS4-3'D3[+]	811	5	0.224177	0.265709	no	ORF313	TAS4-3'D3[+]:ORF313	0.999668

## Sheet: SRX1429178
Target transcript	tasiRNA	tasiRNA slice site position in target transcript	Allen score of sRNA:target duplex	Slice site RPM	Slice site RPM + 1/Maximum adjacent site RPM + 1	Previously verified by 5' RACE?	Target gene common name	Interaction name	P-value adjusted for multiple testing
AT1G56650.1	TAS4-3'D4[-]	477	1	0.0504098	0.874148	yes	ATMYB75	TAS4-3'D4[-]:ATMYB75	0
AT2G33860.1	TAS3C-5'D5[+]	1685	1.5	0.604918	1.03243	yes	ARF3	TAS3C-5'D5[+]:ARF3	0
AT2G33860.1	TAS3C-5'D5[+]	1805	1	0.10082	0.845186	yes	ARF3	TAS3C-5'D5[+]:ARF3	0
AT3G17185.2	TAS3B-5'D8[-]	705	1	0.0504098	0.912425	no	TAS3a	TAS3B-5'D8[-]:TAS3a	0
AT4G29770.2	TAS1A-3'D6[+]	780	3	1.66352	2.41958	yes	NA	TAS1A-3'D6[+]:AT4G29770.2	0
AT5G18065.1	TAS1A-3'D2[+]	736	2	1.10902	1.91586	no	NA	TAS1A-3'D2[+]:AT5G18065.1	0
AT5G18040.1	TAS1A-3'D2[+]	685	2	0.604918	1.28183	yes	NA	TAS1A-3'D2[+]:AT5G18040.1	0.00501172
AT5G60450.1	TAS3A-5'D7[+]	2094	1.5	0.10082	1.10082	yes	ARF4	TAS3A-5'D7[+]:ARF4	0.0109061
AT4G29760.1	TAS1A-3'D6[+]	630	3	0.10082	1.10082	no	NA	TAS1A-3'D6[+]:AT4G29760.1	0.121207
AT1G66370.1	TAS4-3'D4[-]	432	2.5	0.0504098	1	yes	AtMYB113	TAS4-3'D4[-]:AtMYB113	0.167548
AT4G30280.1	TAS3C-5'D2[+]	42	4	1.20984	1.15858	no	ATXTH18	TAS3C-5'D2[+]:ATXTH18	0.212862
AT1G12700.1	TAS1A-3'D9[-]	1471	3.5	0.0504098	1.05041	yes	RPF1	TAS1A-3'D9[-]:RPF1	0.273304
AT5G22640.2	TAS3C-5'D3[+]	1714	3	0.10082	0.956213	no	emb1211	TAS3C-5'D3[+]:emb1211	0.495903
AT1G51670.1	TAS1A-3'D6[+]	536	3.5	0.0504098	1	no	NA	TAS1A-3'D6[+]:AT1G51670.1	0.543703
AT2G39725.2	TAS3B-5'D7[+]	191	4	0.201639	1.04379	no	NA	TAS3B-5'D7[+]:AT2G39725.2	0.62218
AT3G19240.1	TAS4-3'D3[+]	1193	3	0.0504098	0.912425	no	NA	TAS4-3'D3[+]:AT3G19240.1	0.62218
AT3G25882.1	TAS3C-5'D3[+]	104	6	1.51229	1.1634	no	NIMIN-2	TAS3C-5'D3[+]:NIMIN-2	0.62218
AT4G22190.1	TAS3C-5'D3[+]	617	2.5	0.0504098	0.722583	no	NA	TAS3C-5'D3[+]:AT4G22190.1	0.62218
AT5G52580.2	TAS3A-5'D4[+]	1026	4	0.0504098	1	no	NA	TAS3A-5'D4[+]:AT5G52580.2	0.62218
AT5G59950.5	TAS3B-5'D5[+]	1167	4	0.201639	1.04379	no	NA	TAS3B-5'D5[+]:AT5G59950.5	0.62218
AT1G16490.1	TAS1C-3'D5[+]	604	4.5	0.0504098	1.05041	no	ATMYB58	TAS1C-3'D5[+]:ATMYB58	0.6505
AT1G17500.1	TAS3C-5'D8[-]	3806	3.5	0.0504098	1	no	NA	TAS3C-5'D8[-]:AT1G17500.1	0.700587
AT5G47220.1	TAS2-3'D3[-]	811	2	0.151229	0.655543	no	ATERF-2	TAS2-3'D3[-]:ATERF-2	0.734976
AT5G10070.2	TAS3C-5'D6[+]	531	4	0.0504098	1	no	NA	TAS3C-5'D6[+]:AT5G10070.2	0.769265
AT3G04460.1	TAS3C-5'D7[+]	482	4.5	0.10082	1.04799	no	APM4	TAS3C-5'D7[+]:APM4	0.797433
AT5G63450.1	TAS3B-5'D5[+]	1053	3	0.10082	0.845186	no	CYP94B1	TAS3B-5'D5[+]:CYP94B1	0.807893
AT2G37940.1	TAS3C-5'D6[+]	452	5	0.705738	1.13406	no	AtIPCS2	TAS3C-5'D6[+]:AtIPCS2	0.8081
AT3G48090.2	TAS3B-5'D7[+]	1085	4.5	0.0504098	1	no	ATEDS1	TAS3B-5'D7[+]:ATEDS1	0.83298
AT2G32800.1	TAS3C-5'D3[-]	1340	3.5	0.0504098	1.05041	no	AP4.3A	TAS3C-5'D3[-]:AP4.3A	0.845957
AT1G66920.2	TAS4-3'D4[-]	1895	3.5	0.0504098	0.912425	no	NA	TAS4-3'D4[-]:AT1G66920.2	0.909994
AT1G11900.1	TAS3B-5'D1[+]	662	3.5	0.0504098	0.954207	no	NA	TAS3B-5'D1[+]:AT1G11900.1	0.914927
AT3G57950.1	TAS3A-5'D6[+]	530	6	0.302459	1.13136	no	NA	TAS3A-5'D6[+]:AT3G57950.1	0.936392
AT1G80000.2	TAS1B-3'D10[-]	2378	6	0.201639	1.14397	no	NA	TAS1B-3'D10[-]:AT1G80000.2	0.949074
AT3G47340.3	TAS3C-5'D9[-]	2225	3.5	0.10082	1	no	ASN1	TAS3C-5'D9[-]:ASN1	0.949074
AT3G57120.1	TAS3A-5'D2[+]	1125	5.5	0.201639	1.09159	no	NA	TAS3A-5'D2[+]:AT3G57120.1	0.949074
AT4G13040.3	TAS1C-3'D4[+]	65	5	0.201639	1.09159	no	NA	TAS1C-3'D4[+]:AT4G13040.3	0.949074
AT4G36540.2	TAS3B-5'D7[+]	419	3.5	0.0504098	0.954207	no	BEE2	TAS3B-5'D7[+]:BEE2	0.949074
AT5G57370.1	TAS3C-5'D7[+]	890	6	0.302459	1.18317	no	NA	TAS3C-5'D7[+]:AT5G57370.1	0.949074
AT1G45231.2	TAS1C-3'D8[-]	385	6	0.0504098	1.05041	no	NA	TAS1C-3'D8[-]:AT1G45231.2	0.979792
AT1G01240.3	TAS2-3'D7[+]	1693	5	0.0504098	0.838953	no	NA	TAS2-3'D7[+]:AT1G01240.3	1
AT1G01420.1	TAS4-3'D4[+]	1230	6	0.151229	0.26919	no	UGT72B3	TAS4-3'D4[+]:UGT72B3	1
AT1G01500.1	TAS3A-5'D4[-]	1344	4	0.0504098	0.954207	no	NA	TAS3A-5'D4[-]:AT1G01500.1	1
AT1G02500.2	TAS3B-5'D7[-]	1326	6	0.302459	1.04026	no	AtSAM1	TAS3B-5'D7[-]:AtSAM1	1
AT1G03680.1	TAS3A-5'D4[-]	178	5	0.252049	0.415082	no	ATHM1	TAS3A-5'D4[-]:ATHM1	1
AT1G03680.1	TAS3C-5'D3[-]	95	5.5	0.302459	0.786828	no	ATHM1	TAS3C-5'D3[-]:ATHM1	1
AT1G03730.1	TAS3B-5'D3[+]	868	5.5	0.151229	0.958049	no	NA	TAS3B-5'D3[+]:AT1G03730.1	1
AT1G03740.2	TAS3C-5'D10[-]	390	5.5	0.10082	0.956213	no	NA	TAS3C-5'D10[-]:AT1G03740.2	1
AT1G03910.2	TAS2-3'D7[+]	2093	4.5	0.0504098	0.336971	no	NA	TAS2-3'D7[+]:AT1G03910.2	1
AT1G04250.1	TAS3A-5'D10[-]	935	5	0.0504098	0.874148	no	AXR3	TAS3A-5'D10[-]:AXR3	1
AT1G04270.2	TAS1A-3'D5[+]	82	5	0.0504098	0.212372	no	RPS15	TAS1A-3'D5[+]:RPS15	1
AT1G04770.1	TAS3A-5'D8[+]	931	5.5	0.0504098	0.435587	no	NA	TAS3A-5'D8[+]:AT1G04770.1	1
AT1G04780.1	TAS3C-5'D3[+]	2556	5	0.0504098	0.806482	no	NA	TAS3C-5'D3[+]:AT1G04780.1	1
AT1G05910.1	TAS4-3'D9[+]	766	5.5	0.151229	0.883889	no	NA	TAS4-3'D9[+]:AT1G05910.1	1
AT1G06080.1	TAS3C-5'D3[+]	127	4.5	0.0504098	0.912425	no	ADS1	TAS3C-5'D3[+]:ADS1	1
AT1G06160.1	TAS1C-3'D7[-]	681	6	0.352869	0.28003	no	ORA59	TAS1C-3'D7[-]:ORA59	1
AT1G07135.1	TAS3C-5'D3[+]	28	4.5	2.87336	0.299168	no	NA	TAS3C-5'D3[+]:AT1G07135.1	1
AT1G08110.4	TAS3B-5'D5[+]	663	5	0.0504098	0.954207	no	NA	TAS3B-5'D5[+]:AT1G08110.4	1
AT1G08190.1	TAS1C-3'D7[+]	3202	4.5	0.201639	0.856308	no	ATVAM2	TAS1C-3'D7[+]:ATVAM2	1
AT1G08510.1	TAS3B-5'D7[+]	1537	4.5	0.0504098	0.874148	no	FATB	TAS3B-5'D7[+]:FATB	1
AT1G08640.1	TAS3A-5'D5[-]	941	4.5	0.10082	0.813693	no	CJD1	TAS3A-5'D5[-]:CJD1	1
AT1G08980.1	TAS3B-5'D5[-]	1198	6	0.201639	0.826614	no	AMI1	TAS3B-5'D5[-]:AMI1	1
AT1G09070.1	TAS3B-5'D2[+]	533	5.5	1.0082	0.359423	no	(AT)SRC2	TAS3B-5'D2[+]:(AT)SRC2	1
AT1G09932.2	TAS3B-5'D9[+]	715	6	0.0504098	0.698365	no	NA	TAS3B-5'D9[+]:AT1G09932.2	1
AT1G09950.1	TAS1B-3'D1[-]	829	6	0.252049	0.961296	no	RAS1	TAS1B-3'D1[-]:RAS1	1
AT1G10040.2	TAS3C-5'D3[+]	1310	5.5	0.10082	0.784463	no	NA	TAS3C-5'D3[+]:AT1G10040.2	1
AT1G10490.1	TAS3C-5'D8[-]	2896	6	0.151229	1.04579	no	NA	TAS3C-5'D8[-]:AT1G10490.1	1
AT1G11210.1	TAS3A-5'D1[+]	510	6	0.0504098	0.722583	no	NA	TAS3A-5'D1[+]:AT1G11210.1	1
AT1G11592.2	TAS2-3'D10[-]	73	6	0.0504098	0.954207	no	NA	TAS2-3'D10[-]:AT1G11592.2	1
AT1G11680.1	TAS3C-5'D2[+]	994	5.5	0.0504098	0.912425	no	CYP51	TAS3C-5'D2[+]:CYP51	1
AT1G11750.2	TAS3A-5'D4[-]	167	6	0.151229	1	no	CLPP6	TAS3A-5'D4[-]:CLPP6	1
AT1G11910.1	TAS4-3'D7[-]	1668	5	1.0082	0.596036	no	APA1	TAS4-3'D7[-]:APA1	1
AT1G12080.2	TAS3C-5'D8[-]	300	6	0.151229	0.919476	no	NA	TAS3C-5'D8[-]:AT1G12080.2	1
AT1G13250.1	TAS1B-3'D2[-]	1242	6	0.10082	0.845186	no	GATL3	TAS1B-3'D2[-]:GATL3	1
AT1G13340.1	TAS3C-5'D2[+]	771	6	0.0504098	0.698365	no	NA	TAS3C-5'D2[+]:AT1G13340.1	1
AT1G13470.1	TAS4-3'D6[+]	896	6	0.201639	0.35139	no	NA	TAS4-3'D6[+]:AT1G13470.1	1
AT1G14710.2	TAS3C-5'D8[-]	2242	6	0.0504098	0.874148	no	NA	TAS3C-5'D8[-]:AT1G14710.2	1
AT1G14880.1	TAS4-3'D1[+]	79	5.5	0.0504098	0.838953	no	AtPCR1	TAS4-3'D1[+]:AtPCR1	1
AT1G15000.1	TAS3B-5'D5[+]	1106	5.5	0.0504098	0.444887	no	scpl50	TAS3B-5'D5[+]:scpl50	1
AT1G15230.1	TAS1A-3'D9[-]	299	6	0.0504098	0.806482	no	NA	TAS1A-3'D9[-]:AT1G15230.1	1
AT1G15270.1	TAS3B-5'D9[+]	207	6	0.151229	0.217836	no	NA	TAS3B-5'D9[+]:AT1G15270.1	1
AT1G15530.1	TAS1A-3'D7[-]	1699	6	0.0504098	0.698365	no	NA	TAS1A-3'D7[-]:AT1G15530.1	1
AT1G16670.1	TAS1B-3'D10[+]	353	3.5	0.0504098	0.912425	no	NA	TAS1B-3'D10[+]:AT1G16670.1	1
AT1G17490.1	TAS1A-3'D5[+]	342	6	0.10082	0.243077	no	NA	TAS1A-3'D5[+]:AT1G17490.1	1
AT1G17700.1	TAS4-3'D4[-]	205	5.5	0.10082	1.04799	no	PRA1.F1	TAS4-3'D4[-]:PRA1.F1	1
AT1G18540.1	TAS4-3'D8[+]	728	4.5	0.151229	0.740575	no	NA	TAS4-3'D8[+]:AT1G18540.1	1
AT1G18710.1	TAS3A-5'D6[+]	47	4.5	0.0504098	0.954207	no	AtMYB47	TAS3A-5'D6[+]:AtMYB47	1
AT1G18740.1	TAS3B-5'D5[+]	1137	4	0.957787	0.195322	no	NA	TAS3B-5'D5[+]:AT1G18740.1	1
AT1G18870.2	TAS3C-5'D3[+]	1191	5.5	0.0504098	1.05041	no	ATICS2	TAS3C-5'D3[+]:ATICS2	1
AT1G20440.1	TAS3C-5'D3[+]	485	5.5	0.907377	0.759218	no	AtCOR47	TAS3C-5'D3[+]:AtCOR47	1
AT1G20670.1	TAS3B-5'D7[+]	31	5.5	0.0010082	0.799496	no	NA	TAS3B-5'D7[+]:AT1G20670.1	1
AT1G20920.2	TAS2-3'D6[-]	700	6	0.0504098	0.776431	no	NA	TAS2-3'D6[-]:AT1G20920.2	1
AT1G20970.1	TAS3B-5'D7[+]	3918	5.5	0.10082	0.75726	no	NA	TAS3B-5'D7[+]:AT1G20970.1	1
AT1G21600.2	TAS1B-3'D4[-]	285	6	0.0504098	0.912425	no	PTAC6	TAS1B-3'D4[-]:PTAC6	1
AT1G22230.1	TAS3B-5'D9[+]	710	6	0.0010082	0.952969	no	NA	TAS3B-5'D9[+]:AT1G22230.1	1
AT1G22400.1	TAS3C-5'D3[+]	1400	4.5	0.0504098	0.698365	no	ATUGT85A1	TAS3C-5'D3[+]:ATUGT85A1	1
AT1G22520.2	TAS3B-5'D9[+]	57	6	0.302459	0.86594	no	NA	TAS3B-5'D9[+]:AT1G22520.2	1
AT1G22770.1	TAS1A-3'D8[+]	3624	5.5	0.10082	0.916099	no	FB	TAS1A-3'D8[+]:FB	1
AT1G22882.1	TAS3B-5'D7[+]	1927	5.5	0.10082	0.916099	no	NA	TAS3B-5'D7[+]:AT1G22882.1	1
AT1G22882.1	TAS1B-3'D4[-]	2017	5	0.10082	0.916099	no	NA	TAS1B-3'D4[-]:AT1G22882.1	1
AT1G23360.3	TAS1A-3'D4[+]	586	5.5	0.0504098	0.722583	no	MENG	TAS1A-3'D4[+]:MENG	1
AT1G23840.1	TAS2-3'D7[-]	717	6	0.554508	0.30281	no	NA	TAS2-3'D7[-]:AT1G23840.1	1
AT1G25400.2	TAS3B-5'D1[-]	298	5	0.0504098	0.722583	no	NA	TAS3B-5'D1[-]:AT1G25400.2	1
AT1G25400.2	TAS1B-3'D4[-]	887	4.5	0.201639	0.426908	no	NA	TAS1B-3'D4[-]:AT1G25400.2	1
AT1G25422.1	TAS3A-5'D1[+]	274	5.5	0.0504098	0.654494	no	NA	TAS3A-5'D1[+]:AT1G25422.1	1
AT1G26761.1	TAS1B-3'D4[-]	1292	4	0.0504098	0.912425	no	NA	TAS1B-3'D4[-]:AT1G26761.1	1
AT1G26940.1	TAS3C-5'D4[+]	270	6	0.10082	1.10082	no	NA	TAS3C-5'D4[+]:AT1G26940.1	1
AT1G27540.2	TAS4-3'D4[-]	1097	6	0.0504098	0.838953	no	NA	TAS4-3'D4[-]:AT1G27540.2	1
AT1G28190.1	TAS3B-5'D7[+]	652	6	0.201639	0.959738	no	NA	TAS3B-5'D7[+]:AT1G28190.1	1
AT1G28280.2	TAS3B-5'D7[+]	1020	5.5	0.10082	0.813693	no	NA	TAS3B-5'D7[+]:AT1G28280.2	1
AT1G28280.2	TAS3C-5'D4[+]	971	5.5	0.10082	0.75726	no	NA	TAS3C-5'D4[+]:AT1G28280.2	1
AT1G29470.2	TAS3C-5'D2[+]	2313	5	0.0504098	0.806482	no	NA	TAS3C-5'D2[+]:AT1G29470.2	1
AT1G29700.1	TAS1A-3'D7[-]	1231	6	0.10082	0.75726	no	NA	TAS1A-3'D7[-]:AT1G29700.1	1
AT1G30360.1	TAS3C-5'D10[-]	1635	6	0.10082	0.956213	no	ERD4	TAS3C-5'D10[-]:ERD4	1
AT1G30360.1	TAS2-3'D3[+]	2344	5.5	0.151229	0.588026	no	ERD4	TAS2-3'D3[+]:ERD4	1
AT1G31330.1	TAS3C-5'D1[+]	358	5	6.15	0.0567159	no	PSAF	TAS3C-5'D1[+]:PSAF	1
AT1G31540.2	TAS4-3'D6[-]	2920	5.5	0.0504098	0.912425	no	NA	TAS4-3'D6[-]:AT1G31540.2	1
AT1G31540.2	TAS1A-3'D3[-]	412	3.5	0.0504098	0.838953	no	NA	TAS1A-3'D3[-]:AT1G31540.2	1
AT1G32700.2	TAS3A-5'D4[+]	1209	5	0.604918	0.483577	no	NA	TAS3A-5'D4[+]:AT1G32700.2	1
AT1G33265.1	TAS3C-5'D7[-]	760	6	0.0504098	1	no	NA	TAS3C-5'D7[-]:AT1G33265.1	1
AT1G34260.1	TAS1A-3'D8[-]	355	6	0.302459	0.837859	no	FAB1D	TAS1A-3'D8[-]:FAB1D	1
AT1G34350.2	TAS3C-5'D8[+]	786	5.5	0.0504098	0.954207	no	NA	TAS3C-5'D8[+]:AT1G34350.2	1
AT1G35420.2	TAS4-3'D9[+]	323	6	0.10082	0.562278	no	NA	TAS4-3'D9[+]:AT1G35420.2	1
AT1G42550.1	TAS3A-5'D1[+]	2397	4.5	0.252049	0.593664	no	PMI1	TAS3A-5'D1[+]:PMI1	1
AT1G42990.1	TAS4-3'D4[-]	63	4	0.302459	0.86594	no	ATBZIP60	TAS4-3'D4[-]:ATBZIP60	1
AT1G43710.1	TAS3A-5'D1[+]	243	5	0.0403279	1.04033	no	ATSDC1	TAS3A-5'D1[+]:ATSDC1	1
AT1G44820.1	TAS4-3'D2[-]	596	6	0.0504098	1.05041	no	NA	TAS4-3'D2[-]:AT1G44820.1	1
AT1G45165.1	TAS4-3'D4[+]	452	5.5	0.10082	0.956213	no	NA	TAS4-3'D4[+]:AT1G45165.1	1
AT1G45249.3	TAS3C-5'D3[+]	1190	5.5	0.10082	0.609347	no	ABF2	TAS3C-5'D3[+]:ABF2	1
AT1G47200.1	TAS3B-5'D7[+]	622	5	0.0504098	0.806482	no	WPP2	TAS3B-5'D7[+]:WPP2	1
AT1G47830.1	TAS2-3'D4[-]	246	4	0.403279	0.21115	no	NA	TAS2-3'D4[-]:AT1G47830.1	1
AT1G47870.2	TAS1B-3'D10[+]	768	4	0.10082	0.956213	no	ATE2F2	TAS1B-3'D10[+]:ATE2F2	1
AT1G48920.1	TAS4-3'D9[+]	1286	6	0.10082	0.784463	no	ATNUC-L1	TAS4-3'D9[+]:ATNUC-L1	1
AT1G48960.1	TAS1C-3'D9[-]	381	5	0.0504098	0.675718	no	NA	TAS1C-3'D9[-]:AT1G48960.1	1
AT1G49620.1	TAS3C-5'D3[+]	428	6	0.10082	0.75726	no	ICK5	TAS3C-5'D3[+]:ICK5	1
AT1G49720.2	TAS3C-5'D3[+]	1055	4.5	0.0504098	0.722583	no	ABF1	TAS3C-5'D3[+]:ABF1	1
AT1G49850.1	TAS2-3'D9[+]	311	6	0.0504098	1.05041	no	NA	TAS2-3'D9[+]:AT1G49850.1	1
AT1G50920.1	TAS4-3'D2[-]	1957	5	0.0504098	0.698365	no	NA	TAS4-3'D2[-]:AT1G50920.1	1
AT1G52342.1	TAS1B-3'D4[+]	88	6	0.0504098	0.874148	no	NA	TAS1B-3'D4[+]:AT1G52342.1	1
AT1G53910.3	TAS3A-5'D4[-]	1322	6	0.0504098	0.838953	no	RAP2.12	TAS3A-5'D4[-]:RAP2.12	1
AT1G54060.1	TAS3B-5'D7[+]	1148	5.5	0.201639	0.888215	no	ASIL1	TAS3B-5'D7[+]:ASIL1	1
AT1G54060.1	TAS4-3'D2[-]	548	6	0.0504098	0.99952	no	ASIL1	TAS4-3'D2[-]:ASIL1	1
AT1G54770.1	TAS3B-5'D7[+]	656	6	0.201639	0.598366	no	NA	TAS3B-5'D7[+]:AT1G54770.1	1
AT1G54850.1	TAS3C-5'D1[+]	681	6	0.0504098	1	no	NA	TAS3C-5'D1[+]:AT1G54850.1	1
AT1G55480.1	TAS3B-5'D7[+]	379	6	0.0504098	0.912425	no	ZKT	TAS3B-5'D7[+]:ZKT	1
AT1G56110.1	TAS3C-5'D8[-]	1540	5	0.10082	0.956213	no	NOP56	TAS3C-5'D8[-]:NOP56	1
AT1G56150.1	TAS1C-3'D9[+]	46	5.5	0.0504098	0.510252	no	NA	TAS1C-3'D9[+]:AT1G56150.1	1
AT1G56280.2	TAS3B-5'D7[+]	853	5.5	0.0494016	0.485962	no	ATDI19	TAS3B-5'D7[+]:ATDI19	1
AT1G56660.1	TAS3B-5'D9[+]	1212	5	0.403279	0.481305	no	NA	TAS3B-5'D9[+]:AT1G56660.1	1
AT1G56660.1	TAS3B-5'D7[+]	534	5.5	0.504098	0.453199	no	NA	TAS3B-5'D7[+]:AT1G56660.1	1
AT1G57720.2	TAS3B-5'D8[+]	1181	6	0.0504098	0.838953	no	NA	TAS3B-5'D8[+]:AT1G57720.2	1
AT1G59620.1	TAS3B-5'D1[+]	2424	5	0.0504098	0.874148	no	CW9	TAS3B-5'D1[+]:CW9	1
AT1G59910.1	TAS2-3'D3[+]	2758	5.5	1.05861	1	no	NA	TAS2-3'D3[+]:AT1G59910.1	1
AT1G61300.1	TAS4-3'D8[-]	2323	5	0.0504098	0.806482	no	NA	TAS4-3'D8[-]:AT1G61300.1	1
AT1G61730.1	TAS3B-5'D7[-]	1334	5	0.0504098	1	no	NA	TAS3B-5'D7[-]:AT1G61730.1	1
AT1G63090.1	TAS3C-5'D8[+]	1162	6	0.0504098	0.498056	no	AtPP2-A11	TAS3C-5'D8[+]:AtPP2-A11	1
AT1G63460.1	TAS3B-5'D10[-]	267	6	0.0504098	0.912425	no	ATGPX8	TAS3B-5'D10[-]:ATGPX8	1
AT1G63700.1	TAS3A-5'D2[-]	2735	6	0.10082	0.916099	no	EMB71	TAS3A-5'D2[-]:EMB71	1
AT1G63840.1	TAS3A-5'D4[-]	783	4.5	0.151229	0.695469	no	NA	TAS3A-5'D4[-]:AT1G63840.1	1
AT1G64230.5	TAS3A-5'D4[-]	55	6	0.0504098	0.954207	no	UBC28	TAS3A-5'D4[-]:UBC28	1
AT1G64230.5	TAS3C-5'D9[+]	777	6	0.113422	0.652751	no	UBC28	TAS3C-5'D9[+]:UBC28	1
AT1G64330.1	TAS3C-5'D2[-]	1889	4.5	0.0504098	0.912425	no	NA	TAS3C-5'D2[-]:AT1G64330.1	1
AT1G64330.1	TAS3C-5'D7[-]	1902	3.5	0.0504098	0.954207	no	NA	TAS3C-5'D7[-]:AT1G64330.1	1
AT1G64380.1	TAS3B-5'D7[+]	870	4	0.252049	0.566579	no	NA	TAS3B-5'D7[+]:AT1G64380.1	1
AT1G64950.1	TAS3A-5'D4[+]	813	4	0.252049	0.931377	no	CYP89A5	TAS3A-5'D4[+]:CYP89A5	1
AT1G65486.2	TAS3C-5'D3[-]	363	5	0.302459	0.70139	no	NA	TAS3C-5'D3[-]:AT1G65486.2	1
AT1G65690.1	TAS1B-3'D1[-]	515	5	0.0504098	0.912425	no	NA	TAS1B-3'D1[-]:AT1G65690.1	1
AT1G65960.2	TAS3B-5'D6[+]	1452	6	4.03279	0.384229	no	GAD2	TAS3B-5'D6[+]:GAD2	1
AT1G66330.2	TAS3A-5'D4[+]	899	5	0.0504098	0.912425	no	NA	TAS3A-5'D4[+]:AT1G66330.2	1
AT1G66350.1	TAS1C-3'D7[-]	1591	5	0.151229	0.740575	no	RGL	TAS1C-3'D7[-]:RGL	1
AT1G66370.1	TAS4-3'D1[+]	472	5.5	0.0504098	0.874148	yes	AtMYB113	TAS4-3'D1[+]:AtMYB113	1
AT1G67400.1	TAS1A-3'D8[-]	763	5	0.0504098	0.722583	no	NA	TAS1A-3'D8[-]:AT1G67400.1	1
AT1G67490.2	TAS1C-3'D1[-]	2131	6	0.0504098	0.912425	no	GCS1	TAS1C-3'D1[-]:GCS1	1
AT1G67590.2	TAS3C-5'D3[+]	984	5.5	0.0504098	0.776431	no	NA	TAS3C-5'D3[+]:AT1G67590.2	1
AT1G68560.1	TAS1A-3'D7[+]	2201	5.5	0.0504098	0.954207	no	ATXYL1	TAS1A-3'D7[+]:ATXYL1	1
AT1G68590.2	TAS3A-5'D5[+]	192	5	0.352869	0.930646	no	PSRP3/1	TAS3A-5'D5[+]:PSRP3/1	1
AT1G70000.2	TAS3B-5'D6[+]	883	5.5	0.10082	0.562278	no	NA	TAS3B-5'D6[+]:AT1G70000.2	1
AT1G70090.2	TAS3C-5'D5[+]	765	5.5	0.151229	0.958049	no	GATL9	TAS3C-5'D5[+]:GATL9	1
AT1G70700.2	TAS1C-3'D5[-]	1014	6	0.302459	0.682853	no	JAZ9	TAS1C-3'D5[-]:JAZ9	1
AT1G70940.1	TAS1B-3'D7[-]	2248	5.5	0.10082	0.498145	no	ATPIN3	TAS1B-3'D7[-]:ATPIN3	1
AT1G71030.1	TAS1C-3'D1[+]	737	4	0.705738	0.39885	no	ATMYBL2	TAS1C-3'D1[+]:ATMYBL2	1
AT1G71695.1	TAS3B-5'D7[+]	73	5.5	0.10082	0.845186	no	NA	TAS3B-5'D7[+]:AT1G71695.1	1
AT1G71710.2	TAS1B-3'D4[-]	1847	5	0.0504098	0.954207	no	NA	TAS1B-3'D4[-]:AT1G71710.2	1
AT1G72150.1	TAS1C-3'D8[-]	1004	6	0.0504098	0.954207	no	PATL1	TAS1C-3'D8[-]:PATL1	1
AT1G72260.1	TAS2-3'D3[+]	140	6	0.0504098	0.912425	no	THI2.1	TAS2-3'D3[+]:THI2.1	1
AT1G72610.1	TAS3B-5'D7[+]	54	4.5	0.302459	0.380873	no	ATGER1	TAS3B-5'D7[+]:ATGER1	1
AT1G72800.1	TAS1C-3'D5[-]	923	5.5	0.403279	0.422821	no	NA	TAS1C-3'D5[-]:AT1G72800.1	1
AT1G73080.1	TAS3B-5'D7[-]	40	5.5	0.10082	1	no	ATPEPR1	TAS3B-5'D7[-]:ATPEPR1	1
AT1G73760.1	TAS3A-5'D1[+]	1039	5	0.0504098	0.912425	no	NA	TAS3A-5'D1[+]:AT1G73760.1	1
AT1G74430.1	TAS3C-5'D8[-]	226	6	0.0504098	0.722583	no	ATMYB95	TAS3C-5'D8[-]:ATMYB95	1
AT1G74470.1	TAS3B-5'D7[+]	560	5	0.0504098	0.74854	no	NA	TAS3B-5'D7[+]:AT1G74470.1	1
AT1G74710.2	TAS3C-5'D3[+]	1349	5.5	0.151229	0.850954	no	ATICS1	TAS3C-5'D3[+]:ATICS1	1
AT1G74740.1	TAS4-3'D8[+]	1868	5	0.0504098	0.874148	no	ATCPK30	TAS4-3'D8[+]:ATCPK30	1
AT1G76620.1	TAS3A-5'D6[+]	1750	6	0.0504098	1	no	NA	TAS3A-5'D6[+]:AT1G76620.1	1
AT1G76890.2	TAS3A-5'D8[+]	1310	5.5	0.10082	0.731881	no	AT-GT2	TAS3A-5'D8[+]:AT-GT2	1
AT1G77420.1	TAS3B-5'D5[-]	1340	6	0.0504098	0.806482	no	NA	TAS3B-5'D5[-]:AT1G77420.1	1
AT1G77500.1	TAS1C-3'D9[+]	2694	6	0.0504098	1	no	NA	TAS1C-3'D9[+]:AT1G77500.1	1
AT1G77885.1	TAS1A-3'D9[+]	824	6	0.0504098	1	no	NA	TAS1A-3'D9[+]:AT1G77885.1	1
AT1G78270.1	TAS3B-5'D7[+]	1480	5.5	0.252049	0.832425	no	AtUGT85A4	TAS3B-5'D7[+]:AtUGT85A4	1
AT1G78410.1	TAS2-3'D4[-]	408	5	0.0504098	0.838953	no	NA	TAS2-3'D4[-]:AT1G78410.1	1
AT1G78660.3	TAS4-3'D6[-]	1094	5	0.0504098	0.18892	no	ATGGH1	TAS4-3'D6[-]:ATGGH1	1
AT1G78680.2	TAS4-3'D6[-]	1133	5	0.0504098	0.187088	no	ATGGH2	TAS4-3'D6[-]:ATGGH2	1
AT1G78690.1	TAS3B-5'D3[+]	122	5	0.0504098	1	no	At1g78690p	TAS3B-5'D3[+]:At1g78690p	1
AT1G78830.1	TAS3C-5'D8[-]	1332	4	0.0504098	0.912425	no	NA	TAS3C-5'D8[-]:AT1G78830.1	1
AT1G78880.1	TAS3C-5'D3[-]	1995	4.5	0.0504098	0.776431	no	NA	TAS3C-5'D3[-]:AT1G78880.1	1
AT1G78882.1	TAS3C-5'D3[-]	1995	4.5	0.0504098	0.776431	no	CPuORF56	TAS3C-5'D3[-]:CPuORF56	1
AT1G79030.1	TAS3C-5'D8[-]	1698	6	0.0504098	1.05041	no	NA	TAS3C-5'D8[-]:AT1G79030.1	1
AT1G79160.1	TAS4-3'D4[-]	284	5.5	0.0504098	1	no	NA	TAS4-3'D4[-]:AT1G79160.1	1
AT1G79380.1	TAS2-3'D5[+]	1342	4.5	0.0504098	0.722583	no	RGLG4	TAS2-3'D5[+]:RGLG4	1
AT1G80120.1	TAS4-3'D3[-]	241	6	0.10082	0.75726	no	NA	TAS4-3'D3[-]:AT1G80120.1	1
AT1G80120.1	TAS3B-5'D7[+]	81	4	1.20984	0.758994	no	NA	TAS3B-5'D7[+]:AT1G80120.1	1
AT1G80840.1	TAS1C-3'D2[+]	221	5.5	0.0504098	0.698365	no	ATWRKY40	TAS1C-3'D2[+]:ATWRKY40	1
AT2G01100.3	TAS4-3'D8[-]	952	6	0.0504098	0.954207	no	NA	TAS4-3'D8[-]:AT2G01100.3	1
AT2G01670.1	TAS3B-5'D3[+]	174	5.5	0.10082	0.879215	no	atnudt17	TAS3B-5'D3[+]:atnudt17	1
AT2G01850.1	TAS3C-5'D10[+]	917	6	0.151229	0.416457	no	ATXTH27	TAS3C-5'D10[+]:ATXTH27	1
AT2G02010.1	TAS3C-5'D8[+]	1678	5.5	0.10082	0.708147	no	GAD4	TAS3C-5'D8[+]:GAD4	1
AT2G02090.1	TAS3A-5'D1[+]	612	6	0.0504098	0.954207	no	CHA19	TAS3A-5'D1[+]:CHA19	1
AT2G02180.1	TAS3C-5'D9[+]	1100	4.5	0.0504098	0.52306	no	TOM3	TAS3C-5'D9[+]:TOM3	1
AT2G02360.1	TAS3B-5'D10[+]	637	5	0.10082	0.813693	no	AtPP2-B10	TAS3B-5'D10[+]:AtPP2-B10	1
AT2G02760.1	TAS2-3'D6[+]	773	5	0.0504098	0.806482	no	ATUBC2	TAS2-3'D6[+]:ATUBC2	1
AT2G04305.1	TAS3A-5'D6[+]	1144	4.5	0.0504098	1	no	NA	TAS3A-5'D6[+]:AT2G04305.1	1
AT2G06530.1	TAS3A-5'D6[+]	623	5	0.252049	0.360813	no	VPS2.1	TAS3A-5'D6[+]:VPS2.1	1
AT2G07180.2	TAS3B-5'D7[+]	1346	6	0.252049	0.805431	no	NA	TAS3B-5'D7[+]:AT2G07180.2	1
AT2G07718.1	TAS4-3'D3[+]	811	5	0.327664	0.0112972	no	NA	TAS4-3'D3[+]:AT2G07718.1	1
AT2G07772.1	TAS3C-5'D3[+]	30	5.5	0.0252049	0.220251	no	NA	TAS3C-5'D3[+]:AT2G07772.1	1
AT2G10410.1	TAS3A-5'D4[-]	62	5	0.201639	0.959738	no	SADHU1-1	TAS3A-5'D4[-]:SADHU1-1	1
AT2G11910.2	TAS3C-5'D3[-]	669	4	0.10082	0.916099	no	NA	TAS3C-5'D3[-]:AT2G11910.2	1
AT2G16890.2	TAS1A-3'D7[-]	1087	4.5	0.0504098	0.722583	no	NA	TAS1A-3'D7[-]:AT2G16890.2	1
AT2G17840.1	TAS1A-3'D3[-]	614	5.5	1.36107	0.229779	no	ERD7	TAS1A-3'D3[-]:ERD7	1
AT2G18020.1	TAS3C-5'D10[-]	425	6	0.201639	0.773003	no	EMB2296	TAS3C-5'D10[-]:EMB2296	1
AT2G18050.2	TAS3C-5'D3[+]	502	6	0.252049	0.198958	no	HIS1-3	TAS3C-5'D3[+]:HIS1-3	1
AT2G18250.1	TAS3B-5'D9[+]	498	4.5	0.10082	1	no	ATCOAD	TAS3B-5'D9[+]:ATCOAD	1
AT2G18630.1	TAS4-3'D6[+]	1579	6	0.352869	0.69102	no	NA	TAS4-3'D6[+]:AT2G18630.1	1
AT2G19570.1	TAS1B-3'D9[+]	83	6	0.10082	0.75726	no	AT-CDA1	TAS1B-3'D9[+]:AT-CDA1	1
AT2G20120.1	TAS2-3'D3[+]	656	5.5	0.0488975	0.915924	no	COV1	TAS2-3'D3[+]:COV1	1
AT2G20130.1	TAS2-3'D3[+]	657	5.5	0.00151229	0.99549	no	LCV1	TAS2-3'D3[+]:LCV1	1
AT2G20580.1	TAS3B-5'D7[+]	2900	5.5	0.0504098	0.912425	no	ATRPN1A	TAS3B-5'D7[+]:ATRPN1A	1
AT2G20700.1	TAS3B-5'D7[+]	56	5	0.000504098	0.968289	no	LLG2	TAS3B-5'D7[+]:LLG2	1
AT2G20960.1	TAS3C-5'D3[+]	2224	5	0.0504098	0.418108	no	pEARLI4	TAS3C-5'D3[+]:pEARLI4	1
AT2G20960.1	TAS3B-5'D7[+]	2235	5.5	0.0504098	0.806482	no	pEARLI4	TAS3B-5'D7[+]:pEARLI4	1
AT2G21230.3	TAS3B-5'D7[+]	866	5.5	0.10082	0.879215	no	NA	TAS3B-5'D7[+]:AT2G21230.3	1
AT2G21270.3	TAS4-3'D5[+]	345	5.5	0.0504098	0.954207	no	UFD1	TAS4-3'D5[+]:UFD1	1
AT2G21385.4	TAS1B-3'D4[+]	826	5	0.10082	0.845186	no	NA	TAS1B-3'D4[+]:AT2G21385.4	1
AT2G21660.2	TAS4-3'D2[-]	542	5.5	0.403279	0.607307	no	ATGRP7	TAS4-3'D2[-]:ATGRP7	1
AT2G21940.5	TAS3C-5'D8[-]	385	6	0.10082	1.04799	no	ATSK1	TAS3C-5'D8[-]:ATSK1	1
AT2G22080.1	TAS3B-5'D9[+]	441	5.5	0.252049	0.566579	no	NA	TAS3B-5'D9[+]:AT2G22080.1	1
AT2G22122.1	TAS3B-5'D7[+]	182	5.5	0.0504098	0.912425	no	NA	TAS3B-5'D7[+]:AT2G22122.1	1
AT2G22430.1	TAS3C-5'D9[-]	1209	6	2.0668	0.383016	no	ATHB6	TAS3C-5'D9[-]:ATHB6	1
AT2G22795.1	TAS3C-5'D3[+]	814	6	0.10082	0.813693	no	NA	TAS3C-5'D3[+]:AT2G22795.1	1
AT2G23290.1	TAS4-3'D2[-]	566	6	0.0504098	0.675718	no	AtMYB70	TAS4-3'D2[-]:AtMYB70	1
AT2G24020.2	TAS1C-3'D1[-]	269	5	0.0504098	0.954207	no	NA	TAS1C-3'D1[-]:AT2G24020.2	1
AT2G24280.1	TAS2-3'D1[+]	2668	6	0.10082	0.784463	no	NA	TAS2-3'D1[+]:AT2G24280.1	1
AT2G24360.1	TAS3C-5'D3[+]	1643	6	0.10082	0.626838	no	NA	TAS3C-5'D3[+]:AT2G24360.1	1
AT2G25460.1	TAS3C-5'D3[+]	1546	4.5	0.252049	0.756375	no	NA	TAS3C-5'D3[+]:AT2G25460.1	1
AT2G25530.1	TAS3B-5'D7[+]	494	6	0.0504098	1	no	NA	TAS3B-5'D7[+]:AT2G25530.1	1
AT2G25730.2	TAS3B-5'D7[+]	552	6	0.0504098	0.912425	no	NA	TAS3B-5'D7[+]:AT2G25730.2	1
AT2G25900.2	TAS2-3'D8[-]	709	5.5	0.0504098	0.912425	no	ATCTH	TAS2-3'D8[-]:ATCTH	1
AT2G26190.1	TAS3B-5'D9[-]	1893	5	0.352869	0.817282	no	NA	TAS3B-5'D9[-]:AT2G26190.1	1
AT2G26240.1	TAS3C-5'D3[+]	93	4.5	0.0504098	0.874148	no	NA	TAS3C-5'D3[+]:AT2G26240.1	1
AT2G26300.1	TAS3A-5'D4[-]	366	6	0.0504098	1.05041	no	ATGPA1	TAS3A-5'D4[-]:ATGPA1	1
AT2G26430.3	TAS3B-5'D7[+]	1221	6	0.151229	0.740575	no	ATRCY1	TAS3B-5'D7[+]:ATRCY1	1
AT2G26780.1	TAS3C-5'D9[+]	4213	6	0.0504098	1.05041	no	NA	TAS3C-5'D9[+]:AT2G26780.1	1
AT2G27490.2	TAS3C-5'D3[+]	296	4.5	0.0504098	0.874148	no	ATCOAE	TAS3C-5'D3[+]:ATCOAE	1
AT2G27660.1	TAS1C-3'D5[-]	964	6	0.302459	0.811542	no	NA	TAS1C-3'D5[-]:AT2G27660.1	1
AT2G28710.1	TAS4-3'D9[+]	448	4.5	0.0504098	0.912425	no	NA	TAS4-3'D9[+]:AT2G28710.1	1
AT2G28910.1	TAS3B-5'D7[+]	560	5.5	0.252049	0.674244	no	CXIP4	TAS3B-5'D7[+]:CXIP4	1
AT2G28910.1	TAS3B-5'D7[+]	809	6	0.655328	0.548778	no	CXIP4	TAS3B-5'D7[+]:CXIP4	1
AT2G28910.1	TAS1B-3'D3[+]	947	5.5	0.0504098	0.776431	no	CXIP4	TAS1B-3'D3[+]:CXIP4	1
AT2G29420.1	TAS3B-5'D7[+]	395	4	0.151229	0.369314	no	ATGSTU7	TAS3B-5'D7[+]:ATGSTU7	1
AT2G29960.2	TAS3B-5'D1[+]	277	5	0.10082	0.879215	no	ATCYP5	TAS3B-5'D1[+]:ATCYP5	1
AT2G30500.2	TAS1C-3'D5[-]	1354	6	0.302459	0.895969	no	NET4B	TAS1C-3'D5[-]:NET4B	1
AT2G30570.1	TAS3B-5'D7[+]	263	6	0.554508	0.197882	no	PSBW	TAS3B-5'D7[+]:PSBW	1
AT2G30766.2	TAS3C-5'D7[-]	128	4	0.0504098	0.354153	no	NA	TAS3C-5'D7[-]:AT2G30766.2	1
AT2G30860.2	TAS3C-5'D8[-]	131	6	0.0504098	0.380541	no	ATGSTF7	TAS3C-5'D8[-]:ATGSTF7	1
AT2G33150.1	TAS3B-5'D7[-]	1589	5	0.604918	0.913886	no	KAT2	TAS3B-5'D7[-]:KAT2	1
AT2G33590.1	TAS3C-5'D3[+]	1093	5	0.0504098	0.912425	no	AtCRL1	TAS3C-5'D3[+]:AtCRL1	1
AT2G33600.1	TAS3C-5'D3[+]	846	6	0.0504098	0.331609	no	AtCRL2	TAS3C-5'D3[+]:AtCRL2	1
AT2G34450.2	TAS3C-5'D3[+]	37	6	0.10082	1.04799	no	NA	TAS3C-5'D3[+]:AT2G34450.2	1
AT2G34660.2	TAS3C-5'D10[-]	4840	4	0.151229	0.919476	no	ABCC2	TAS3C-5'D10[-]:ABCC2	1
AT2G35260.1	TAS3C-5'D3[+]	1038	6	0.756147	0.276845	no	NA	TAS3C-5'D3[+]:AT2G35260.1	1
AT2G35630.1	TAS2-3'D7[+]	6075	5	0.151229	0.919476	no	GEM1	TAS2-3'D7[+]:GEM1	1
AT2G35650.1	TAS3C-5'D4[+]	715	6	0.0504098	1.05041	no	ATCSLA07	TAS3C-5'D4[+]:ATCSLA07	1
AT2G35940.3	TAS4-3'D9[-]	2758	4.5	0.10082	0.685904	no	BLH1	TAS4-3'D9[-]:BLH1	1
AT2G36160.1	TAS1B-3'D4[-]	536	5.5	0.0504098	0.722583	no	NA	TAS1B-3'D4[-]:AT2G36160.1	1
AT2G36770.1	TAS3B-5'D1[+]	1023	5.5	0.0504098	0.912425	no	NA	TAS3B-5'D1[+]:AT2G36770.1	1
AT2G36790.1	TAS3C-5'D8[-]	1028	6	0.015627	0.921344	no	UGT73C6	TAS3C-5'D8[-]:UGT73C6	1
AT2G36800.1	TAS1B-3'D4[-]	674	5.5	0.151229	1	no	DOGT1	TAS1B-3'D4[-]:DOGT1	1
AT2G36950.1	TAS3C-5'D3[+]	905	6	0.10082	0.879215	no	NA	TAS3C-5'D3[+]:AT2G36950.1	1
AT2G37340.3	TAS4-3'D5[+]	442	6	0.0504098	0.954207	no	AT-RS2Z33	TAS4-3'D5[+]:AT-RS2Z33	1
AT2G38250.1	TAS3B-5'D7[+]	710	5	0.252049	0.579805	no	NA	TAS3B-5'D7[+]:AT2G38250.1	1
AT2G39110.1	TAS3C-5'D3[+]	1328	6	0.0504098	1	no	NA	TAS3C-5'D3[+]:AT2G39110.1	1
AT2G39870.1	TAS3C-5'D5[-]	1564	5	0.705738	0.754668	no	NA	TAS3C-5'D5[-]:AT2G39870.1	1
AT2G40140.2	TAS3C-5'D3[+]	202	6	0.0504098	0.912425	no	ATSZF2	TAS3C-5'D3[+]:ATSZF2	1
AT2G41290.1	TAS3C-5'D10[+]	1046	4.5	0.0504098	0.634563	no	SSL2	TAS3C-5'D10[+]:SSL2	1
AT2G41870.1	TAS3C-5'D1[+]	691	6	0.554508	0.71987	no	NA	TAS3C-5'D1[+]:AT2G41870.1	1
AT2G42010.1	TAS3B-5'D1[+]	3511	5	0.151229	0.717313	no	PLDBETA	TAS3B-5'D1[+]:PLDBETA	1
AT2G42040.1	TAS1A-3'D7[-]	779	5.5	0.0504098	0.722583	no	NA	TAS1A-3'D7[-]:AT2G42040.1	1
AT2G42190.1	TAS3C-5'D3[+]	480	5	0.0504098	0.698365	no	NA	TAS3C-5'D3[+]:AT2G42190.1	1
AT2G43235.1	TAS3B-5'D6[+]	1188	5.5	0.0504098	1	no	NA	TAS3B-5'D6[+]:AT2G43235.1	1
AT2G43340.1	TAS4-3'D6[+]	643	3.5	0.0504098	0.838953	no	NA	TAS4-3'D6[+]:AT2G43340.1	1
AT2G44200.1	TAS3B-5'D5[+]	1138	5.5	0.10082	0.645363	no	NA	TAS3B-5'D5[+]:AT2G44200.1	1
AT2G44230.1	TAS4-3'D6[+]	1488	5	0.10082	0.784463	no	NA	TAS4-3'D6[+]:AT2G44230.1	1
AT2G44370.1	TAS3C-5'D8[-]	855	6	0.151229	1.04579	no	NA	TAS3C-5'D8[-]:AT2G44370.1	1
AT2G45070.4	TAS3C-5'D8[-]	201	5.5	0.252049	0.925477	no	SEC61 BETA	TAS3C-5'D8[-]:SEC61 BETA	1
AT2G45960.3	TAS1B-3'D4[+]	1185	6	0.201639	1.09159	no	ATHH2	TAS1B-3'D4[+]:ATHH2	1
AT3G02540.3	TAS1A-3'D9[-]	1330	5.5	0.0504098	0.838953	no	RAD23-3	TAS1A-3'D9[-]:RAD23-3	1
AT3G02770.1	TAS2-3'D9[-]	342	4.5	0.252049	0.832425	no	NA	TAS2-3'D9[-]:AT3G02770.1	1
AT3G02875.1	TAS4-3'D2[+]	1085	6	0.0504098	0.912425	no	ILR1	TAS4-3'D2[+]:ILR1	1
AT3G03050.1	TAS3C-5'D8[+]	4078	4.5	0.0504098	0.74854	no	ATCSLD3	TAS3C-5'D8[+]:ATCSLD3	1
AT3G04210.1	TAS3B-5'D5[+]	1687	5	0.0504098	0.581443	no	NA	TAS3B-5'D5[+]:AT3G04210.1	1
AT3G04210.1	TAS3B-5'D7[+]	506	5.5	0.0504098	0.874148	no	NA	TAS3B-5'D7[+]:AT3G04210.1	1
AT3G04400.2	TAS3C-5'D8[+]	574	5.5	0.0504098	0.598133	no	emb2171	TAS3C-5'D8[+]:emb2171	1
AT3G04920.1	TAS3A-5'D8[+]	255	5	0.252049	0.734022	no	NA	TAS3A-5'D8[+]:AT3G04920.1	1
AT3G05030.2	TAS4-3'D6[+]	671	6	0.0504098	0.874148	no	ATNHX2	TAS4-3'D6[+]:ATNHX2	1
AT3G06360.1	TAS3A-5'D1[-]	391	6	0.0504098	1.05041	no	AGP27	TAS3A-5'D1[-]:AGP27	1
AT3G06430.1	TAS1A-3'D5[-]	987	6	0.0504098	1	no	AtPPR2	TAS1A-3'D5[-]:AtPPR2	1
AT3G06580.1	TAS3B-5'D9[+]	1561	5.5	0.0504098	0.874148	no	GAL1	TAS3B-5'D9[+]:GAL1	1
AT3G06760.2	TAS3B-5'D7[+]	861	4	0.0504098	0.74854	no	NA	TAS3B-5'D7[+]:AT3G06760.2	1
AT3G08720.2	TAS4-3'D2[-]	1400	6	0.403279	0.570001	no	ATPK19	TAS4-3'D2[-]:ATPK19	1
AT3G08720.2	TAS3C-5'D4[+]	1732	5.5	1.05861	0.492983	no	ATPK19	TAS3C-5'D4[+]:ATPK19	1
AT3G09035.1	TAS3C-5'D8[-]	1256	6	0.0504098	0.912425	no	NA	TAS3C-5'D8[-]:AT3G09035.1	1
AT3G09735.1	TAS3C-5'D3[+]	291	5.5	0.201639	0.856308	no	NA	TAS3C-5'D3[+]:AT3G09735.1	1
AT3G09810.1	TAS3C-5'D10[-]	948	5	0.0504098	1	no	IDH-VI	TAS3C-5'D10[-]:IDH-VI	1
AT3G09980.1	TAS1B-3'D9[-]	260	5.5	0.201639	0.856308	no	NA	TAS1B-3'D9[-]:AT3G09980.1	1
AT3G10040.1	TAS1A-3'D7[-]	1144	6	0.0504098	1	no	NA	TAS1A-3'D7[-]:AT3G10040.1	1
AT3G11110.1	TAS3A-5'D1[+]	306	5.5	0.0504098	0.99952	no	NA	TAS3A-5'D1[+]:AT3G11110.1	1
AT3G11490.1	TAS3C-5'D8[-]	1102	6	0.0504098	0.874148	no	NA	TAS3C-5'D8[-]:AT3G11490.1	1
AT3G11500.1	TAS4-3'D9[+]	286	4	0.0504098	0.565659	no	NA	TAS4-3'D9[+]:AT3G11500.1	1
AT3G11510.1	TAS4-3'D9[+]	685	5.5	0.151229	0.603567	no	NA	TAS4-3'D9[+]:AT3G11510.1	1
AT3G11690.1	TAS3A-5'D1[+]	1196	6	0.10082	1	no	NA	TAS3A-5'D1[+]:AT3G11690.1	1
AT3G12130.1	TAS4-3'D9[-]	1060	4	0.10082	0.956213	no	NA	TAS4-3'D9[-]:AT3G12130.1	1
AT3G12800.1	TAS2-3'D6[-]	762	5	0.0504098	0.874148	no	DECR	TAS2-3'D6[-]:DECR	1
AT3G13080.4	TAS3B-5'D4[+]	4460	5.5	0.0504098	0.806482	no	ABCC3	TAS3B-5'D4[+]:ABCC3	1
AT3G13175.1	TAS3A-5'D4[-]	205	5.5	0.0504098	0.954207	no	NA	TAS3A-5'D4[-]:AT3G13175.1	1
AT3G13437.1	TAS3B-5'D7[+]	149	5	0.151229	0.765395	no	NA	TAS3B-5'D7[+]:AT3G13437.1	1
AT3G14230.3	TAS3C-5'D2[-]	1483	5	0.201639	0.498299	no	RAP2.2	TAS3C-5'D2[-]:RAP2.2	1
AT3G15080.1	TAS3B-5'D7[+]	809	6	0.0504098	1.05041	no	NA	TAS3B-5'D7[+]:AT3G15080.1	1
AT3G16010.1	TAS1C-3'D6[+]	1916	6	0.10082	0.916099	no	NA	TAS1C-3'D6[+]:AT3G16010.1	1
AT3G16720.1	TAS3B-5'D7[+]	1045	5.5	0.151229	0.54586	no	ATL2	TAS3B-5'D7[+]:ATL2	1
AT3G16840.1	TAS2-3'D1[-]	388	6	0.201639	0.922593	no	NA	TAS2-3'D1[-]:AT3G16840.1	1
AT3G17050.1	TAS1A-3'D8[-]	39	5.5	0.352869	0.770362	no	NA	TAS1A-3'D8[-]:AT3G17050.1	1
AT3G17170.1	TAS3C-5'D3[+]	905	5	0.0504098	0.912425	no	RFC3	TAS3C-5'D3[+]:RFC3	1
AT3G17410.1	TAS3C-5'D10[-]	957	6	0.0504098	0.722583	no	NA	TAS3C-5'D10[-]:AT3G17410.1	1
AT3G19180.2	TAS3C-5'D2[+]	2690	6	0.0504098	1	no	ARC6H	TAS3C-5'D2[+]:ARC6H	1
AT3G19290.3	TAS3C-5'D3[+]	1231	6	0.0504098	1	no	ABF4	TAS3C-5'D3[+]:ABF4	1
AT3G19450.1	TAS1A-3'D9[-]	1185	5.5	0.10082	0.75726	no	ATCAD4	TAS1A-3'D9[-]:ATCAD4	1
AT3G20040.1	TAS3B-5'D3[+]	1554	6	0.0504098	1	no	ATHXK4	TAS3B-5'D3[+]:ATHXK4	1
AT3G21175.3	TAS3B-5'D1[+]	343	6	0.10082	1.04799	no	GATA24	TAS3B-5'D1[+]:GATA24	1
AT3G21400.1	TAS3C-5'D10[+]	391	5	0.0504098	0.954207	no	NA	TAS3C-5'D10[+]:AT3G21400.1	1
AT3G22380.2	TAS3B-5'D7[+]	184	5.5	0.302459	0.454585	no	TIC	TAS3B-5'D7[+]:TIC	1
AT3G22968.1	TAS3C-5'D2[-]	1782	5	0.0504098	1	no	CPuORF59	TAS3C-5'D2[-]:CPuORF59	1
AT3G22970.2	TAS3C-5'D2[-]	1780	5	0.0504098	1	no	NA	TAS3C-5'D2[-]:AT3G22970.2	1
AT3G23240.1	TAS3C-5'D8[-]	598	6	1.41148	0.773602	no	ATERF1	TAS3C-5'D8[-]:ATERF1	1
AT3G23400.1	TAS3A-5'D8[+]	729	5.5	0.0504098	0.698365	no	FIB4	TAS3A-5'D8[+]:FIB4	1
AT3G23450.1	TAS4-3'D4[+]	300	5.5	0.0504098	0.74854	no	NA	TAS4-3'D4[+]:AT3G23450.1	1
AT3G23450.1	TAS4-3'D2[-]	317	5.5	0.0504098	0.598133	no	NA	TAS4-3'D2[-]:AT3G23450.1	1
AT3G24100.1	TAS3C-5'D2[+]	156	6	0.0504098	0.550709	no	NA	TAS3C-5'D2[+]:AT3G24100.1	1
AT3G24140.1	TAS3C-5'D3[+]	681	6	0.0504098	0.838953	no	FMA	TAS3C-5'D3[+]:FMA	1
AT3G25290.2	TAS4-3'D7[+]	1246	4	0.0504098	0.912425	no	NA	TAS4-3'D7[+]:AT3G25290.2	1
AT3G25670.1	TAS3C-5'D8[-]	1257	6	0.10082	1.04799	no	NA	TAS3C-5'D8[-]:AT3G25670.1	1
AT3G25840.2	TAS3C-5'D3[+]	378	6	0.151229	1.04579	no	NA	TAS3C-5'D3[+]:AT3G25840.2	1
AT3G27820.1	TAS3C-5'D4[+]	1325	6	0.504098	1.11178	no	ATMDAR4	TAS3C-5'D4[+]:ATMDAR4	1
AT3G28600.1	TAS3A-5'D9[+]	1120	5.5	0.10082	1	no	NA	TAS3A-5'D9[+]:AT3G28600.1	1
AT3G29575.4	TAS3B-5'D7[+]	272	6	0.0504098	0.954207	no	AFP3	TAS3B-5'D7[+]:AFP3	1
AT3G30380.2	TAS3C-5'D3[+]	475	6	0.0504098	0.954207	no	NA	TAS3C-5'D3[+]:AT3G30380.2	1
AT3G44340.2	TAS3B-5'D7[+]	3649	6	0.0504098	0.874148	no	CEF	TAS3B-5'D7[+]:CEF	1
AT3G46510.1	TAS1C-3'D8[+]	2023	5.5	0.604918	0.913886	no	ATPUB13	TAS1C-3'D8[+]:ATPUB13	1
AT3G47160.2	TAS3C-5'D2[+]	647	5.5	0.0504098	0.486429	no	NA	TAS3C-5'D2[+]:AT3G47160.2	1
AT3G47540.2	TAS4-3'D4[-]	416	5.5	0.0504098	0.74854	no	NA	TAS4-3'D4[-]:AT3G47540.2	1
AT3G47960.1	TAS2-3'D8[-]	1088	5	0.0504098	0.912425	no	GTR1	TAS2-3'D8[-]:GTR1	1
AT3G48330.2	TAS1C-3'D6[-]	582	4.5	0.0504098	0.874148	no	ATPIMT1	TAS1C-3'D6[-]:ATPIMT1	1
AT3G48450.1	TAS1B-3'D5[-]	95	6	0.10082	0.916099	no	NA	TAS1B-3'D5[-]:AT3G48450.1	1
AT3G48570.1	TAS1A-3'D8[-]	194	4.5	0.10082	0.956213	no	NA	TAS1A-3'D8[-]:AT3G48570.1	1
AT3G49910.1	TAS1C-3'D6[+]	581	5	0.252049	0.608201	no	NA	TAS1C-3'D6[+]:AT3G49910.1	1
AT3G50140.1	TAS3B-5'D5[-]	1674	5.5	0.0504098	0.954207	no	NA	TAS3B-5'D5[-]:AT3G50140.1	1
AT3G50740.1	TAS1C-3'D4[-]	459	6	0.0504098	0.776431	no	UGT72E1	TAS1C-3'D4[-]:UGT72E1	1
AT3G50890.1	TAS3B-5'D7[+]	692	4.5	0.201639	0.959738	no	AtHB28	TAS3B-5'D7[+]:AtHB28	1
AT3G50930.1	TAS3B-5'D9[+]	2133	5	0.302459	0.682853	no	BCS1	TAS3B-5'D9[+]:BCS1	1
AT3G51370.2	TAS4-3'D1[+]	396	5	0.10082	0.956213	no	NA	TAS4-3'D1[+]:AT3G51370.2	1
AT3G51370.2	TAS4-3'D3[-]	647	4.5	0.10082	0.813693	no	NA	TAS4-3'D3[-]:AT3G51370.2	1
AT3G51750.3	TAS4-3'D9[+]	23	6	0.0504098	0.954207	no	NA	TAS4-3'D9[+]:AT3G51750.3	1
AT3G52570.1	TAS2-3'D9[-]	640	5	0.10082	0.879215	no	NA	TAS2-3'D9[-]:AT3G52570.1	1
AT3G52870.1	TAS3C-5'D4[+]	603	6	0.10082	0.956213	no	NA	TAS3C-5'D4[+]:AT3G52870.1	1
AT3G53110.1	TAS1A-3'D8[+]	1320	6	0.10082	0.813693	no	LOS4	TAS1A-3'D8[+]:LOS4	1
AT3G53990.2	TAS1C-3'D8[+]	907	5.5	0.0504098	0.912425	no	NA	TAS1C-3'D8[+]:AT3G53990.2	1
AT3G54000.3	TAS1A-3'D7[-]	1530	5.5	0.151229	0.820385	no	NA	TAS1A-3'D7[-]:AT3G54000.3	1
AT3G54150.1	TAS3C-5'D3[+]	66	6	0.0504098	1.05041	no	NA	TAS3C-5'D3[+]:AT3G54150.1	1
AT3G54390.1	TAS3C-5'D3[+]	909	6	0.10082	0.879215	no	NA	TAS3C-5'D3[+]:AT3G54390.1	1
AT3G54690.1	TAS3B-5'D10[+]	789	4	0.0504098	0.954207	no	SETH3	TAS3B-5'D10[+]:SETH3	1
AT3G55430.1	TAS4-3'D6[+]	568	6	0.10082	0.476409	no	NA	TAS4-3'D6[+]:AT3G55430.1	1
AT3G55690.1	TAS3C-5'D2[+]	989	4.5	0.10082	1	no	NA	TAS3C-5'D2[+]:AT3G55690.1	1
AT3G55950.1	TAS4-3'D1[+]	1957	4	0.352869	0.598548	no	ATCRR3	TAS4-3'D1[+]:ATCRR3	1
AT3G56360.1	TAS1B-3'D4[-]	361	5	3.5791	0.145378	no	NA	TAS1B-3'D4[-]:AT3G56360.1	1
AT3G56510.2	TAS3B-5'D2[-]	1013	6	0.0504098	1.05041	no	NA	TAS3B-5'D2[-]:AT3G56510.2	1
AT3G57330.1	TAS3C-5'D3[+]	2807	6	0.0504098	0.776431	no	ACA11	TAS3C-5'D3[+]:ACA11	1
AT3G57750.2	TAS4-3'D9[+]	872	6	0.10082	0.577138	no	NA	TAS4-3'D9[+]:AT3G57750.2	1
AT3G58030.4	TAS3C-5'D3[+]	1884	6	0.151229	0.919476	no	NA	TAS3C-5'D3[+]:AT3G58030.4	1
AT3G58090.1	TAS3C-5'D2[+]	338	5.5	0.0504098	0.654494	no	NA	TAS3C-5'D2[+]:AT3G58090.1	1
AT3G58140.1	TAS2-3'D9[+]	1136	5.5	0.0504098	0.806482	no	NA	TAS2-3'D9[+]:AT3G58140.1	1
AT3G58600.1	TAS3C-5'D4[+]	415	6	0.10082	1.10082	no	NA	TAS3C-5'D4[+]:AT3G58600.1	1
AT3G58840.2	TAS1A-3'D9[-]	422	4.5	0.302459	0.928154	no	PMD1	TAS1A-3'D9[-]:PMD1	1
AT3G59020.2	TAS4-3'D9[-]	3608	6	0.0504098	1	no	NA	TAS4-3'D9[-]:AT3G59020.2	1
AT3G59940.1	TAS4-3'D9[+]	1241	6	1.26025	0.119618	no	NA	TAS4-3'D9[+]:AT3G59940.1	1
AT3G59940.1	TAS3A-5'D2[-]	1325	6	0.957787	0.143397	no	NA	TAS3A-5'D2[-]:AT3G59940.1	1
AT3G60110.1	TAS3A-5'D6[+]	1854	5.5	0.0504098	0.806482	no	NA	TAS3A-5'D6[+]:AT3G60110.1	1
AT3G60360.1	TAS3B-5'D7[+]	607	6	0.0504098	0.874148	no	EDA14	TAS3B-5'D7[+]:EDA14	1
AT3G60600.3	TAS3C-5'D9[-]	103	4.5	0.0504098	1	no	(AT)VAP	TAS3C-5'D9[-]:(AT)VAP	1
AT3G60750.2	TAS3B-5'D7[+]	2144	5.5	0.151229	0.791937	no	NA	TAS3B-5'D7[+]:AT3G60750.2	1
AT3G61060.2	TAS3C-5'D8[+]	154	4.5	0.0504098	0.954207	no	AtPP2-A13	TAS3C-5'D8[+]:AtPP2-A13	1
AT3G61260.1	TAS3B-5'D7[+]	609	4.5	0.10082	0.879215	no	NA	TAS3B-5'D7[+]:AT3G61260.1	1
AT3G61460.1	TAS3B-5'D1[-]	706	6	0.0504098	0.874148	no	BRH1	TAS3B-5'D1[-]:BRH1	1
AT3G62360.1	TAS3C-5'D2[+]	3522	6	0.151229	1	no	NA	TAS3C-5'D2[+]:AT3G62360.1	1
AT3G62940.3	TAS3B-5'D7[+]	679	6	0.0504098	0.912425	no	NA	TAS3B-5'D7[+]:AT3G62940.3	1
AT3G63120.1	TAS4-3'D6[-]	401	4.5	0.0504098	0.776431	no	CYCP1;1	TAS4-3'D6[-]:CYCP1;1	1
AT3G63440.1	TAS2-3'D7[+]	1580	5.5	0.0504098	0.74854	no	ATCKX6	TAS2-3'D7[+]:ATCKX6	1
AT3G63500.2	TAS3C-5'D3[+]	3409	5.5	0.0504098	0.654494	no	TTA2	TAS3C-5'D3[+]:TTA2	1
AT4G00720.1	TAS2-3'D3[+]	1423	6	0.0504098	0.838953	no	ASKTHETA	TAS2-3'D3[+]:ASKTHETA	1
AT4G00730.2	TAS2-3'D5[-]	3118	5.5	0.0504098	0.776431	no	AHDP	TAS2-3'D5[-]:AHDP	1
AT4G01250.1	TAS2-3'D9[+]	695	6	3.83115	0.820264	no	AtWRKY22	TAS2-3'D9[+]:AtWRKY22	1
AT4G01330.2	TAS1A-3'D7[-]	996	6	0.10082	0.916099	no	NA	TAS1A-3'D7[-]:AT4G01330.2	1
AT4G01460.1	TAS3B-5'D6[+]	1064	6	0.0504098	0.838953	no	NA	TAS3B-5'D6[+]:AT4G01460.1	1
AT4G02200.3	TAS3B-5'D7[+]	693	4.5	0.0504098	0.806482	no	NA	TAS3B-5'D7[+]:AT4G02200.3	1
AT4G02370.1	TAS3B-5'D5[+]	589	5.5	0.10082	0.577138	no	NA	TAS3B-5'D5[+]:AT4G02370.1	1
AT4G02380.2	TAS3A-5'D4[-]	157	5	0.10082	0.336803	no	AtLEA5	TAS3A-5'D4[-]:AtLEA5	1
AT4G02380.2	TAS3B-5'D7[+]	351	6	3.47828	0.141272	no	AtLEA5	TAS3B-5'D7[+]:AtLEA5	1
AT4G02530.1	TAS3B-5'D9[+]	298	6	0.10082	0.784463	no	NA	TAS3B-5'D9[+]:AT4G02530.1	1
AT4G02530.1	TAS3C-5'D2[+]	515	6	0.0504098	0.912425	no	NA	TAS3C-5'D2[+]:AT4G02530.1	1
AT4G04640.1	TAS4-3'D9[-]	1325	6	1.86516	0.850383	no	ATPC1	TAS4-3'D9[-]:ATPC1	1
AT4G08220.1	TAS1A-3'D8[-]	410	5	0.0504098	1	no	NA	TAS1A-3'D8[-]:AT4G08220.1	1
AT4G08810.1	TAS1C-3'D7[-]	1295	6	0.10082	0.956213	no	SUB1	TAS1C-3'D7[-]:SUB1	1
AT4G08950.1	TAS3A-5'D4[-]	118	4.5	0.453688	0.431456	no	EXO	TAS3A-5'D4[-]:EXO	1
AT4G09200.1	TAS3A-5'D2[+]	93	5	0.0166352	0.983421	no	NA	TAS3A-5'D2[+]:AT4G09200.1	1
AT4G09250.1	TAS3A-5'D2[+]	79	5	0.0166352	0.983421	no	NA	TAS3A-5'D2[+]:AT4G09250.1	1
AT4G09310.1	TAS3A-5'D2[+]	93	5	0.0166352	0.983421	no	NA	TAS3A-5'D2[+]:AT4G09310.1	1
AT4G10280.1	TAS4-3'D1[+]	263	6	0.151229	0.850954	no	NA	TAS4-3'D1[+]:AT4G10280.1	1
AT4G10430.3	TAS1C-3'D7[-]	845	5.5	0.10082	0.534739	no	NA	TAS1C-3'D7[-]:AT4G10430.3	1
AT4G11300.1	TAS3B-5'D7[+]	1127	6	0.10082	0.956213	no	NA	TAS3B-5'D7[+]:AT4G11300.1	1
AT4G11960.2	TAS3A-5'D8[-]	910	6	0.302459	0.369965	no	PGRL1B	TAS3A-5'D8[-]:PGRL1B	1
AT4G12780.2	TAS3B-5'D9[+]	1648	6	0.151229	0.850954	no	NA	TAS3B-5'D9[+]:AT4G12780.2	1
AT4G13550.1	TAS1A-3'D7[-]	2490	5	0.0504098	0.838953	no	NA	TAS1A-3'D7[-]:AT4G13550.1	1
AT4G13970.1	TAS1A-3'D1[-]	2647	5.5	0.0504098	0.954207	no	NA	TAS1A-3'D1[-]:AT4G13970.1	1
AT4G14370.1	TAS1A-3'D4[+]	435	5	0.0504098	0.838953	no	NA	TAS1A-3'D4[+]:AT4G14370.1	1
AT4G14500.2	TAS3C-5'D4[+]	1366	5	0.252049	0.415082	no	NA	TAS3C-5'D4[+]:AT4G14500.2	1
AT4G14580.1	TAS3B-5'D7[+]	991	6	0.0504098	0.698365	no	CIPK4	TAS3B-5'D7[+]:CIPK4	1
AT4G14990.1	TAS3A-5'D6[+]	2970	5	0.403279	0.698775	no	NA	TAS3A-5'D6[+]:AT4G14990.1	1
AT4G15110.1	TAS2-3'D4[+]	1734	5	0.10082	0.916099	no	CYP97B3	TAS2-3'D4[+]:CYP97B3	1
AT4G15260.1	TAS3A-5'D4[+]	1272	6	0.252049	0.656425	no	NA	TAS3A-5'D4[+]:AT4G15260.1	1
AT4G16430.1	TAS2-3'D2[+]	1104	5	0.0504098	0.954207	no	NA	TAS2-3'D2[+]:AT4G16430.1	1
AT4G16860.1	TAS3A-5'D2[+]	371	6	0.0504098	0.954207	no	RPP4	TAS3A-5'D2[+]:RPP4	1
AT4G17230.1	TAS3B-5'D7[+]	1570	4.5	1.41148	0.199457	no	SCL13	TAS3B-5'D7[+]:SCL13	1
AT4G17510.1	TAS4-3'D8[-]	661	6	0.025709	0.787517	no	UCH3	TAS4-3'D8[-]:UCH3	1
AT4G17615.2	TAS1A-3'D7[+]	1033	4.5	0.0504098	0.698365	no	ATCBL1	TAS1A-3'D7[+]:ATCBL1	1
AT4G17615.2	TAS3A-5'D7[-]	741	6	0.201639	0.442767	no	ATCBL1	TAS3A-5'D7[-]:ATCBL1	1
AT4G17900.2	TAS1C-3'D1[+]	940	4.5	0.10082	0.498145	no	NA	TAS1C-3'D1[+]:AT4G17900.2	1
AT4G18030.1	TAS1C-3'D7[-]	1758	4	0.0504098	0.912425	no	NA	TAS1C-3'D7[-]:AT4G18030.1	1
AT4G18280.1	TAS4-3'D6[+]	203	5.5	0.201639	0.856308	no	NA	TAS4-3'D6[+]:AT4G18280.1	1
AT4G18593.1	TAS3A-5'D3[+]	116	5.5	0.10082	1	no	NA	TAS3A-5'D3[+]:AT4G18593.1	1
AT4G18593.1	TAS1B-3'D4[-]	340	5.5	0.0504098	0.806482	no	NA	TAS1B-3'D4[-]:AT4G18593.1	1
AT4G19490.2	TAS1C-3'D1[+]	3411	5	0.10082	1	no	ATVPS54	TAS1C-3'D1[+]:ATVPS54	1
AT4G19860.1	TAS4-3'D4[-]	431	4.5	0.0504098	0.954207	no	NA	TAS4-3'D4[-]:AT4G19860.1	1
AT4G21660.2	TAS3B-5'D7[+]	1739	6	0.10082	0.609347	no	NA	TAS3B-5'D7[+]:AT4G21660.2	1
AT4G21960.1	TAS3B-5'D7[+]	600	6	0.10082	0.813693	no	PRXR1	TAS3B-5'D7[+]:PRXR1	1
AT4G22220.1	TAS3C-5'D3[+]	643	5.5	0.554508	0.187078	no	ATISU1	TAS3C-5'D3[+]:ATISU1	1
AT4G22470.1	TAS3C-5'D4[+]	548	6	0.0670451	0.969318	no	NA	TAS3C-5'D4[+]:AT4G22470.1	1
AT4G22470.1	TAS3C-5'D4[+]	911	6	0.0337746	0.764135	no	NA	TAS3C-5'D4[+]:AT4G22470.1	1
AT4G22880.2	TAS3B-5'D2[+]	889	5.5	0.0504098	0.806482	no	ANS	TAS3B-5'D2[+]:ANS	1
AT4G23190.1	TAS4-3'D8[+]	143	5.5	0.0504098	1.05041	no	AT-RLK3	TAS4-3'D8[+]:AT-RLK3	1
AT4G23260.2	TAS1A-3'D1[-]	1734	6	0.0504098	0.874148	no	CRK18	TAS1A-3'D1[-]:CRK18	1
AT4G23710.1	TAS1A-3'D3[+]	89	6	0.10082	0.626838	no	VAG2	TAS1A-3'D3[+]:VAG2	1
AT4G23810.1	TAS3B-5'D9[+]	689	5.5	0.302459	0.720962	no	ATWRKY53	TAS3B-5'D9[+]:ATWRKY53	1
AT4G24290.2	TAS3C-5'D5[+]	2032	4	0.10082	0.845186	no	NA	TAS3C-5'D5[+]:AT4G24290.2	1
AT4G24290.2	TAS3C-5'D3[+]	2072	5	0.252049	0.925477	no	NA	TAS3C-5'D3[+]:AT4G24290.2	1
AT4G24570.1	TAS3B-5'D9[+]	1112	6	0.201639	0.0243528	no	DIC2	TAS3B-5'D9[+]:DIC2	1
AT4G25080.5	TAS1A-3'D9[-]	1012	5	0.10082	0.879215	no	CHLM	TAS1A-3'D9[-]:CHLM	1
AT4G25230.2	TAS1B-3'D3[+]	940	5.5	0.0504098	1	no	RIN2	TAS1B-3'D3[+]:RIN2	1
AT4G25370.1	TAS3B-5'D10[+]	775	5	0.10082	0.665016	no	NA	TAS3B-5'D10[+]:AT4G25370.1	1
AT4G25390.2	TAS3C-5'D3[+]	1475	6	0.201639	0.748723	no	NA	TAS3C-5'D3[+]:AT4G25390.2	1
AT4G25390.2	TAS1C-3'D1[-]	457	6	0.0504098	0.954207	no	NA	TAS1C-3'D1[-]:AT4G25390.2	1
AT4G25490.1	TAS4-3'D6[-]	173	6	0.0504098	0.954207	no	ATCBF1	TAS4-3'D6[-]:ATCBF1	1
AT4G25570.1	TAS3B-5'D7[+]	50	5	0.403279	0.847735	no	ACYB-2	TAS3B-5'D7[+]:ACYB-2	1
AT4G25620.1	TAS3C-5'D3[+]	1621	5	0.302459	0.86594	no	NA	TAS3C-5'D3[+]:AT4G25620.1	1
AT4G25730.1	TAS3B-5'D7[+]	2386	6	0.151229	0.883889	no	NA	TAS3B-5'D7[+]:AT4G25730.1	1
AT4G25835.1	TAS3B-5'D7[+]	1662	3.5	0.0504098	0.806482	no	NA	TAS3B-5'D7[+]:AT4G25835.1	1
AT4G26080.1	TAS3C-5'D3[+]	1464	4	0.604918	0.462502	no	ABI1	TAS3C-5'D3[+]:ABI1	1
AT4G26630.2	TAS3C-5'D3[+]	836	6	0.604918	0.72626	no	NA	TAS3C-5'D3[+]:AT4G26630.2	1
AT4G26630.2	TAS3B-5'D9[+]	969	6	0.10082	0.609347	no	NA	TAS3B-5'D9[+]:AT4G26630.2	1
AT4G26950.2	TAS3C-5'D8[-]	427	5	0.0504098	0.598133	no	NA	TAS3C-5'D8[-]:AT4G26950.2	1
AT4G27700.1	TAS3C-5'D3[-]	557	5.5	0.0504098	0.0333486	no	NA	TAS3C-5'D3[-]:AT4G27700.1	1
AT4G27900.2	TAS3C-5'D2[+]	877	6	0.10082	0.784463	no	NA	TAS3C-5'D2[+]:AT4G27900.2	1
AT4G28085.2	TAS4-3'D9[+]	210	5.5	0.252049	0.508572	no	NA	TAS4-3'D9[+]:AT4G28085.2	1
AT4G28350.1	TAS3B-5'D1[+]	881	5	0.10082	0.916099	no	NA	TAS3B-5'D1[+]:AT4G28350.1	1
AT4G28490.1	TAS2-3'D8[-]	2912	4.5	0.10082	0.75726	no	HAE	TAS2-3'D8[-]:HAE	1
AT4G28706.4	TAS3C-5'D8[-]	720	5.5	0.0504098	1	no	NA	TAS3C-5'D8[-]:AT4G28706.4	1
AT4G28750.1	TAS3A-5'D7[+]	329	6	1.19623	0.311558	no	PSAE-1	TAS3A-5'D7[+]:PSAE-1	1
AT4G29590.1	TAS1C-3'D8[-]	796	5	0.252049	0.209003	no	NA	TAS1C-3'D8[-]:AT4G29590.1	1
AT4G30060.1	TAS3A-5'D4[-]	1670	4.5	0.0504098	0.654494	no	NA	TAS3A-5'D4[-]:AT4G30060.1	1
AT4G30240.1	TAS3B-5'D7[+]	117	5.5	0.0504098	1	no	NA	TAS3B-5'D7[+]:AT4G30240.1	1
AT4G30270.1	TAS3C-5'D1[+]	840	5.5	0.403279	0.874362	no	MERI-5	TAS3C-5'D1[+]:MERI-5	1
AT4G30440.1	TAS3B-5'D3[+]	1118	5.5	0.151229	0.54586	no	GAE1	TAS3B-5'D3[+]:GAE1	1
AT4G31300.3	TAS3B-5'D1[+]	411	5	0.10082	0.665016	no	PBA1	TAS3B-5'D1[+]:PBA1	1
AT4G32010.1	TAS1A-3'D3[-]	3246	5	0.0504098	0.838953	no	HSI2-L1	TAS1A-3'D3[-]:HSI2-L1	1
AT4G32070.1	TAS4-3'D4[+]	687	6	0.10082	0.916099	no	Phox4	TAS4-3'D4[+]:Phox4	1
AT4G32800.1	TAS1B-3'D8[+]	889	5	0.0504098	0.874148	no	NA	TAS1B-3'D8[+]:AT4G32800.1	1
AT4G33430.2	TAS2-3'D1[-]	2125	5	0.302459	0.837859	no	ATBAK1	TAS2-3'D1[-]:ATBAK1	1
AT4G33920.1	TAS3C-5'D3[+]	1160	6	0.756147	0.249896	no	NA	TAS3C-5'D3[+]:AT4G33920.1	1
AT4G33920.1	TAS3A-5'D10[-]	1219	5.5	1.20984	0.785093	no	NA	TAS3A-5'D10[-]:AT4G33920.1	1
AT4G34131.1	TAS3C-5'D3[+]	1137	6	0.10082	0.956213	no	UGT73B3	TAS3C-5'D3[+]:UGT73B3	1
AT4G34215.2	TAS3B-5'D1[+]	487	5	0.0504098	0.874148	no	NA	TAS3B-5'D1[+]:AT4G34215.2	1
AT4G34960.1	TAS2-3'D8[-]	876	6	0.0504098	0.435587	no	NA	TAS2-3'D8[-]:AT4G34960.1	1
AT4G35110.4	TAS1B-3'D4[-]	1131	5.5	0.10082	0.645363	no	NA	TAS1B-3'D4[-]:AT4G35110.4	1
AT4G36648.1	TAS1A-3'D2[-]	1908	6	0.0504098	0.675718	no	NA	TAS1A-3'D2[-]:AT4G36648.1	1
AT4G36730.2	TAS2-3'D1[-]	1135	5	4.43607	0.0948574	no	AtGBF1	TAS2-3'D1[-]:AtGBF1	1
AT4G36810.1	TAS3C-5'D1[-]	1012	5	0.151229	0.919476	no	AtGGPPS11	TAS3C-5'D1[-]:AtGGPPS11	1
AT4G37180.2	TAS3A-5'D1[+]	1077	5.5	0.10082	0.75726	no	NA	TAS3A-5'D1[+]:AT4G37180.2	1
AT4G37770.1	TAS3A-5'D4[-]	1049	5	0.0504098	0.954207	no	ACS8	TAS3A-5'D4[-]:ACS8	1
AT4G37820.1	TAS3C-5'D3[+]	1734	5	0.10082	0.956213	no	NA	TAS3C-5'D3[+]:AT4G37820.1	1
AT4G38430.1	TAS1A-3'D9[-]	1755	5	0.10082	0.813693	no	ATROPGEF1	TAS1A-3'D9[-]:ATROPGEF1	1
AT4G38550.1	TAS4-3'D6[-]	2031	3.5	1.81475	0.628534	no	NA	TAS4-3'D6[-]:AT4G38550.1	1
AT4G39040.2	TAS3B-5'D7[+]	276	6	0.0504098	0.838953	no	NA	TAS3B-5'D7[+]:AT4G39040.2	1
AT4G39080.1	TAS3A-5'D1[+]	1992	6	0.10082	1.04799	no	VHA-A3	TAS3A-5'D1[+]:VHA-A3	1
AT4G39820.1	TAS3B-5'D3[+]	1312	6	0.0504098	0.722583	no	NA	TAS3B-5'D3[+]:AT4G39820.1	1
AT5G01410.1	TAS4-3'D6[+]	694	6	0.151229	0.883889	no	ATPDX1	TAS4-3'D6[+]:ATPDX1	1
AT5G01730.1	TAS1A-3'D1[-]	3509	5	0.0504098	1	no	ATSCAR4	TAS1A-3'D1[-]:ATSCAR4	1
AT5G01820.1	TAS1A-3'D7[-]	1309	5.5	2.16762	0.732051	no	ATCIPK14	TAS1A-3'D7[-]:ATCIPK14	1
AT5G01980.1	TAS4-3'D1[+]	772	5.5	0.151229	1.04579	no	NA	TAS4-3'D1[+]:AT5G01980.1	1
AT5G02120.1	TAS2-3'D5[+]	339	6	0.0504098	0.776431	no	OHP	TAS2-3'D5[+]:OHP	1
AT5G02880.1	TAS3C-5'D3[+]	4606	6	0.0504098	0.912425	no	UPL4	TAS3C-5'D3[+]:UPL4	1
AT5G03880.1	TAS1B-3'D4[+]	537	6	0.10082	0.813693	no	NA	TAS1B-3'D4[+]:AT5G03880.1	1
AT5G04340.1	TAS2-3'D1[+]	959	6	0.0504098	0.874148	no	C2H2	TAS2-3'D1[+]:C2H2	1
AT5G04600.1	TAS3B-5'D9[+]	623	5.5	0.352869	0.456129	no	NA	TAS3B-5'D9[+]:AT5G04600.1	1
AT5G04760.1	TAS1A-3'D4[-]	521	6	0.151229	0.740575	no	NA	TAS1A-3'D4[-]:AT5G04760.1	1
AT5G04830.2	TAS4-3'D1[+]	276	4	0.10082	0.916099	no	NA	TAS4-3'D1[+]:AT5G04830.2	1
AT5G05250.1	TAS1B-3'D9[-]	596	6	0.0504098	0.634563	no	NA	TAS1B-3'D9[-]:AT5G05250.1	1
AT5G05470.1	TAS1C-3'D7[+]	1233	5.5	0.10082	1	no	ATEIF2-A2	TAS1C-3'D7[+]:ATEIF2-A2	1
AT5G05690.3	TAS4-3'D9[+]	702	5.5	0.10082	0.75726	no	CBB3	TAS4-3'D9[+]:CBB3	1
AT5G05730.2	TAS3A-5'D7[-]	2069	6	0.0504098	0.838953	no	AMT1	TAS3A-5'D7[-]:AMT1	1
AT5G06530.3	TAS3C-5'D1[+]	2474	6	0.554508	0.860481	no	ABCG22	TAS3C-5'D1[+]:ABCG22	1
AT5G06560.1	TAS3C-5'D9[+]	1964	4	0.10082	0.68612	no	NA	TAS3C-5'D9[+]:AT5G06560.1	1
AT5G06980.4	TAS3C-5'D3[+]	177	5	0.252049	0.892231	no	NA	TAS3C-5'D3[+]:AT5G06980.4	1
AT5G07100.2	TAS3B-5'D7[+]	889	5.5	0.0504098	1	no	WRKY26	TAS3B-5'D7[+]:WRKY26	1
AT5G07270.1	TAS3B-5'D9[+]	1590	5.5	0.0504098	0.912425	no	XBAT33	TAS3B-5'D9[+]:XBAT33	1
AT5G08350.1	TAS2-3'D5[+]	673	6	0.0504098	0.954207	no	NA	TAS2-3'D5[+]:AT5G08350.1	1
AT5G08590.1	TAS1C-3'D6[-]	899	3.5	0.10082	0.685904	no	ASK2	TAS1C-3'D6[-]:ASK2	1
AT5G08630.1	TAS3C-5'D4[+]	1603	5	0.10082	1	no	NA	TAS3C-5'D4[+]:AT5G08630.1	1
AT5G09880.1	TAS3B-5'D7[+]	456	5	0.0504098	0.910829	no	NA	TAS3B-5'D7[+]:AT5G09880.1	1
AT5G09920.1	TAS1A-3'D9[-]	402	6	0.0504098	0.912425	no	ATRPB15.9	TAS1A-3'D9[-]:ATRPB15.9	1
AT5G10210.1	TAS1A-3'D8[-]	483	6	0.0504098	0.954207	no	NA	TAS1A-3'D8[-]:AT5G10210.1	1
AT5G10290.1	TAS1B-3'D4[-]	1885	5.5	0.252049	0.892231	no	NA	TAS1B-3'D4[-]:AT5G10290.1	1
AT5G10450.4	TAS4-3'D9[+]	519	6	0.0504098	0.722583	no	14-3-3lambda	TAS4-3'D9[+]:14-3-3lambda	1
AT5G10480.3	TAS3C-5'D3[+]	795	5	0.0504098	0.838953	no	PAS2	TAS3C-5'D3[+]:PAS2	1
AT5G11890.1	TAS3B-5'D7[+]	834	6	0.10082	0.813693	no	EMB3135	TAS3B-5'D7[+]:EMB3135	1
AT5G14030.4	TAS1A-3'D2[-]	645	5	0.0504098	0.874148	no	NA	TAS1A-3'D2[-]:AT5G14030.4	1
AT5G14440.2	TAS3C-5'D8[-]	569	5.5	0.0504098	0.912425	no	NA	TAS3C-5'D8[-]:AT5G14440.2	1
AT5G14700.1	TAS2-3'D6[+]	10	5	0.302459	0.380873	no	NA	TAS2-3'D6[+]:AT5G14700.1	1
AT5G14920.2	TAS2-3'D8[+]	1075	4.5	0.352869	0.507925	no	NA	TAS2-3'D8[+]:AT5G14920.2	1
AT5G14950.1	TAS3A-5'D3[+]	2529	6	0.0504098	1.05041	no	ATGMII	TAS3A-5'D3[+]:ATGMII	1
AT5G16010.1	TAS3B-5'D5[+]	542	6	0.201639	0.856308	no	NA	TAS3B-5'D5[+]:AT5G16010.1	1
AT5G16450.2	TAS2-3'D9[-]	441	4.5	0.0504098	0.74854	no	NA	TAS2-3'D9[-]:AT5G16450.2	1
AT5G16510.2	TAS2-3'D7[+]	977	5.5	0.0504098	0.912425	no	RGP5	TAS2-3'D7[+]:RGP5	1
AT5G16620.1	TAS3C-5'D1[+]	1242	5.5	0.0504098	0.954207	no	ATTIC40	TAS3C-5'D1[+]:ATTIC40	1
AT5G16780.1	TAS3B-5'D7[+]	571	4	0.252049	0.656425	no	DOT2	TAS3B-5'D7[+]:DOT2	1
AT5G16780.1	TAS3B-5'D9[+]	602	5	0.10082	0.609347	no	DOT2	TAS3B-5'D9[+]:DOT2	1
AT5G16970.1	TAS1A-3'D7[-]	995	3.5	0.504098	0.32847	no	AER	TAS1A-3'D7[-]:AER	1
AT5G17450.2	TAS3A-5'D9[-]	51	5.5	0.0504098	0.874148	no	HIPP21	TAS3A-5'D9[-]:HIPP21	1
AT5G17910.2	TAS3C-5'D3[+]	1244	6	0.10082	0.645363	no	NA	TAS3C-5'D3[+]:AT5G17910.2	1
AT5G18170.1	TAS3C-5'D8[-]	97	6	0.0504098	0.806482	no	GDH1	TAS3C-5'D8[-]:GDH1	1
AT5G18520.1	TAS4-3'D9[+]	1334	6	0.201639	0.888215	no	Cand7	TAS4-3'D9[+]:Cand7	1
AT5G18610.2	TAS4-3'D1[+]	1791	5	0.201639	0.922593	no	NA	TAS4-3'D1[+]:AT5G18610.2	1
AT5G19140.2	TAS4-3'D9[+]	1218	6	0.0504098	0.874148	no	AILP1	TAS4-3'D9[+]:AILP1	1
AT5G20190.1	TAS1A-3'D6[+]	644	5.5	0.252049	0.389073	no	NA	TAS1A-3'D6[+]:AT5G20190.1	1
AT5G20220.2	TAS2-3'D2[-]	1327	6	0.0504098	0.912425	no	NA	TAS2-3'D2[-]:AT5G20220.2	1
AT5G22000.3	TAS3A-5'D6[+]	1212	4	0.151229	0.588026	no	RHF2A	TAS3A-5'D6[+]:RHF2A	1
AT5G22000.3	TAS1A-3'D7[-]	1391	6	0.151229	0.655543	no	RHF2A	TAS1A-3'D7[-]:RHF2A	1
AT5G22120.1	TAS1B-3'D10[-]	1351	5.5	0.10082	1.04799	no	NA	TAS1B-3'D10[-]:AT5G22120.1	1
AT5G22310.1	TAS3C-5'D3[+]	1187	6	0.10082	0.879215	no	NA	TAS3C-5'D3[+]:AT5G22310.1	1
AT5G22380.1	TAS3C-5'D2[+]	57	6	0.0504098	0.954207	no	anac090	TAS3C-5'D2[+]:anac090	1
AT5G22580.1	TAS3C-5'D3[+]	170	6	0.302459	0.928154	no	NA	TAS3C-5'D3[+]:AT5G22580.1	1
AT5G23890.1	TAS3C-5'D8[-]	2592	6	0.0504098	0.912425	no	NA	TAS3C-5'D8[-]:AT5G23890.1	1
AT5G24690.1	TAS1B-3'D4[-]	1035	6	0.10082	1	no	NA	TAS1B-3'D4[-]:AT5G24690.1	1
AT5G25250.1	TAS3C-5'D1[+]	563	6	0.10082	0.813693	no	FLOT1	TAS3C-5'D1[+]:FLOT1	1
AT5G25560.4	TAS3A-5'D4[-]	2523	5	0.0504098	0.912425	no	NA	TAS3A-5'D4[-]:AT5G25560.4	1
AT5G26000.2	TAS3C-5'D2[+]	823	5.5	0.302459	0.837859	no	AtTGG1	TAS3C-5'D2[+]:AtTGG1	1
AT5G26340.1	TAS1A-3'D9[-]	1541	4.5	0.756147	0.484948	no	ATSTP13	TAS1A-3'D9[-]:ATSTP13	1
AT5G26742.3	TAS3B-5'D8[+]	1802	5.5	0.10082	0.879215	no	AtRH3	TAS3B-5'D8[+]:AtRH3	1
AT5G27420.1	TAS1C-3'D4[-]	1100	6	0.151229	0.695469	no	ATL31	TAS1C-3'D4[-]:ATL31	1
AT5G27560.1	TAS3B-5'D9[+]	1106	4.5	0.0504098	0.838953	no	NA	TAS3B-5'D9[+]:AT5G27560.1	1
AT5G27720.1	TAS3C-5'D6[+]	219	4.5	0.0504098	0.912425	no	emb1644	TAS3C-5'D6[+]:emb1644	1
AT5G27930.2	TAS2-3'D4[-]	325	5	0.10082	0.813693	no	NA	TAS2-3'D4[-]:AT5G27930.2	1
AT5G28237.1	TAS3B-5'D7[+]	44	3.5	0.10082	0.708147	no	NA	TAS3B-5'D7[+]:AT5G28237.1	1
AT5G28237.1	TAS2-3'D3[+]	768	4.5	0.151229	0.740575	no	NA	TAS2-3'D3[+]:AT5G28237.1	1
AT5G35170.2	TAS3C-5'D4[+]	985	5.5	0.0504098	0.954207	no	NA	TAS3C-5'D4[+]:AT5G35170.2	1
AT5G35630.3	TAS2-3'D4[+]	1421	6	0.0504098	0.838953	no	ATGSL1	TAS2-3'D4[+]:ATGSL1	1
AT5G35910.1	TAS3B-5'D7[+]	2578	5.5	0.0504098	0.912425	no	NA	TAS3B-5'D7[+]:AT5G35910.1	1
AT5G37130.1	TAS1A-3'D9[-]	2607	5.5	0.0504098	0.776431	no	NA	TAS1A-3'D9[-]:AT5G37130.1	1
AT5G37370.4	TAS3B-5'D7[+]	953	5.5	0.201639	0.959738	no	ATSRL1	TAS3B-5'D7[+]:ATSRL1	1
AT5G37540.1	TAS3C-5'D4[-]	1395	6	0.10082	0.75726	no	NA	TAS3C-5'D4[-]:AT5G37540.1	1
AT5G38410.3	TAS3C-5'D8[-]	100	4.5	0.151229	0.588026	no	RBCS3B	TAS3C-5'D8[-]:RBCS3B	1
AT5G38660.2	TAS3C-5'D3[+]	81	5.5	0.0504098	0.954207	no	APE1	TAS3C-5'D3[+]:APE1	1
AT5G40140.1	TAS3A-5'D4[+]	1329	5	0.0504098	0.838953	no	NA	TAS3A-5'D4[+]:AT5G40140.1	1
AT5G40340.1	TAS3B-5'D7[+]	2199	5.5	0.302459	0.763575	no	NA	TAS3B-5'D7[+]:AT5G40340.1	1
AT5G41750.2	TAS3C-5'D4[+]	2843	6	0.201639	0.583714	no	NA	TAS3C-5'D4[+]:AT5G41750.2	1
AT5G42440.1	TAS1A-3'D8[-]	1013	5.5	0.201639	0.748723	no	NA	TAS1A-3'D8[-]:AT5G42440.1	1
AT5G42440.1	TAS4-3'D4[+]	754	6	0.151229	0.820385	no	NA	TAS4-3'D4[+]:AT5G42440.1	1
AT5G42530.1	TAS3C-5'D1[-]	333	5	0.201639	0.53164	no	NA	TAS3C-5'D1[-]:AT5G42530.1	1
AT5G42650.1	TAS4-3'D4[-]	506	6	0.0504098	0.912425	no	AOS	TAS4-3'D4[-]:AOS	1
AT5G42950.1	TAS3B-5'D9[+]	5046	6	0.10082	0.845186	no	NA	TAS3B-5'D9[+]:AT5G42950.1	1
AT5G43850.1	TAS3B-5'D5[+]	136	5.5	0.152238	0.656117	no	ARD4	TAS3B-5'D5[+]:ARD4	1
AT5G43880.1	TAS3C-5'D2[+]	2471	6	0.201639	0.379351	no	TRM21	TAS3C-5'D2[+]:TRM21	1
AT5G44510.1	TAS1C-3'D9[-]	2292	5.5	0.0504098	1.05041	no	TAO1	TAS1C-3'D9[-]:TAO1	1
AT5G44720.2	TAS3C-5'D1[-]	236	6	0.10082	1.04799	no	NA	TAS3C-5'D1[-]:AT5G44720.2	1
AT5G44740.2	TAS3C-5'D7[-]	1698	6	0.0504098	1.05041	no	POLH	TAS3C-5'D7[-]:POLH	1
AT5G45250.1	TAS3C-5'D8[-]	3345	5	0.0504098	0.838953	no	RPS4	TAS3C-5'D8[-]:RPS4	1
AT5G45280.2	TAS3C-5'D2[+]	1171	6	0.0504098	0.74854	no	NA	TAS3C-5'D2[+]:AT5G45280.2	1
AT5G45340.2	TAS3C-5'D3[+]	1050	6	0.0504098	0.776431	no	CYP707A3	TAS3C-5'D3[+]:CYP707A3	1
AT5G46210.1	TAS3C-5'D8[-]	1328	6	0.0504098	1	no	ATCUL4	TAS3C-5'D8[-]:ATCUL4	1
AT5G46330.1	TAS1A-3'D6[-]	334	6	0.0504098	0.954207	no	FLS2	TAS1A-3'D6[-]:FLS2	1
AT5G46330.1	TAS3C-5'D7[-]	3422	5	0.0504098	0.912425	no	FLS2	TAS3C-5'D7[-]:FLS2	1
AT5G46450.1	TAS3B-5'D1[+]	3299	5.5	0.0504098	0.912425	no	NA	TAS3B-5'D1[+]:AT5G46450.1	1
AT5G46510.1	TAS3B-5'D10[+]	2350	6	0.0252049	1	no	NA	TAS3B-5'D10[+]:AT5G46510.1	1
AT5G46520.1	TAS3B-5'D10[+]	2426	6	0.0252049	1	no	NA	TAS3B-5'D10[+]:AT5G46520.1	1
AT5G47050.1	TAS3C-5'D3[-]	256	6	0.0504098	1	no	NA	TAS3C-5'D3[-]:AT5G47050.1	1
AT5G47120.1	TAS3C-5'D3[+]	773	6	0.0504098	0.727629	no	ATBI-1	TAS3C-5'D3[+]:ATBI-1	1
AT5G47420.1	TAS1A-3'D8[-]	828	6	0.0504098	1	no	NA	TAS1A-3'D8[-]:AT5G47420.1	1
AT5G47730.3	TAS1B-3'D8[+]	1154	5.5	0.0504098	1	no	NA	TAS1B-3'D8[+]:AT5G47730.3	1
AT5G47910.1	TAS3C-5'D2[+]	2062	6	0.10082	1	no	ATRBOHD	TAS3C-5'D2[+]:ATRBOHD	1
AT5G48180.1	TAS1B-3'D7[-]	657	5.5	0.201639	0.959738	no	AtNSP5	TAS1B-3'D7[-]:AtNSP5	1
AT5G48655.3	TAS4-3'D3[+]	801	5.5	0.0504098	0.838953	no	NA	TAS4-3'D3[+]:AT5G48655.3	1
AT5G48970.1	TAS3A-5'D2[-]	1260	5.5	0.0504098	0.654494	no	NA	TAS3A-5'D2[-]:AT5G48970.1	1
AT5G49510.2	TAS1C-3'D9[-]	414	5.5	0.0504098	0.806482	no	PFD3	TAS1C-3'D9[-]:PFD3	1
AT5G49550.1	TAS3C-5'D8[-]	236	5.5	0.10082	0.784463	no	BLOS2	TAS3C-5'D8[-]:BLOS2	1
AT5G50570.2	TAS2-3'D3[+]	336	5	0.0252049	0.910464	no	SPL13	TAS2-3'D3[+]:SPL13	1
AT5G50670.1	TAS2-3'D3[+]	471	5	0.0252049	0.910464	no	SPL13	TAS2-3'D3[+]:SPL13	1
AT5G51410.3	TAS3B-5'D9[+]	1065	6	0.0504098	0.838953	no	NA	TAS3B-5'D9[+]:AT5G51410.3	1
AT5G51440.1	TAS3C-5'D4[+]	603	6	0.0504098	0.912425	no	NA	TAS3C-5'D4[+]:AT5G51440.1	1
AT5G52010.1	TAS3C-5'D9[+]	589	5	0.0504098	1	no	NA	TAS3C-5'D9[+]:AT5G52010.1	1
AT5G52510.1	TAS1B-3'D1[+]	1731	5.5	0.10082	0.731881	no	SCL8	TAS1B-3'D1[+]:SCL8	1
AT5G52660.2	TAS3B-5'D1[+]	487	4.5	0.0504098	1	no	NA	TAS3B-5'D1[+]:AT5G52660.2	1
AT5G52920.1	TAS4-3'D1[-]	1531	6	0.151229	1.09598	no	PKP-BETA1	TAS4-3'D1[-]:PKP-BETA1	1
AT5G53110.1	TAS3C-5'D3[-]	1160	6	0.0504098	1	no	NA	TAS3C-5'D3[-]:AT5G53110.1	1
AT5G53760.2	TAS3C-5'D3[+]	538	6	0.0504098	1.05041	no	ATMLO11	TAS3C-5'D3[+]:ATMLO11	1
AT5G54250.3	TAS1A-3'D7[-]	246	5.5	0.10082	1	no	ATCNGC4	TAS1A-3'D7[-]:ATCNGC4	1
AT5G54380.1	TAS1C-3'D1[-]	1762	5.5	0.0504098	1	no	THE1	TAS1C-3'D1[-]:THE1	1
AT5G56190.2	TAS3C-5'D2[+]	1347	5.5	0.0504098	0.874148	no	NA	TAS3C-5'D2[+]:AT5G56190.2	1
AT5G57150.4	TAS1A-3'D7[-]	191	3.5	0.0504098	0.874148	no	NA	TAS1A-3'D7[-]:AT5G57150.4	1
AT5G57710.1	TAS3B-5'D7[+]	3022	6	1.91557	0.293833	no	NA	TAS3B-5'D7[+]:AT5G57710.1	1
AT5G57760.1	TAS3C-5'D3[+]	332	5.5	0.10082	0.956213	no	NA	TAS3C-5'D3[+]:AT5G57760.1	1
AT5G57950.1	TAS3C-5'D8[-]	52	6	0.0504098	0.912425	no	NA	TAS3C-5'D8[-]:AT5G57950.1	1
AT5G57990.1	TAS3C-5'D3[+]	2551	4	0.0504098	0.722583	no	UBP23	TAS3C-5'D3[+]:UBP23	1
AT5G58330.3	TAS3C-5'D10[-]	619	6	0.0504098	0.838953	no	NA	TAS3C-5'D10[-]:AT5G58330.3	1
AT5G58720.3	TAS3B-5'D10[+]	1689	6	0.0504098	0.954207	no	NA	TAS3B-5'D10[+]:AT5G58720.3	1
AT5G60030.1	TAS3B-5'D7[+]	729	5.5	0.0504098	0.834919	no	NA	TAS3B-5'D7[+]:AT5G60030.1	1
AT5G60800.2	TAS3C-5'D3[+]	692	4.5	0.0504098	0.675718	no	NA	TAS3C-5'D3[+]:AT5G60800.2	1
AT5G61150.2	TAS3A-5'D8[+]	1407	4	0.0504098	0.912425	no	VIP4	TAS3A-5'D8[+]:VIP4	1
AT5G61330.1	TAS3A-5'D1[+]	386	5.5	0.10082	0.956213	no	NA	TAS3A-5'D1[+]:AT5G61330.1	1
AT5G61480.1	TAS1A-3'D8[-]	3076	5.5	0.151229	0.919476	no	PXY	TAS1A-3'D8[-]:PXY	1
AT5G61770.3	TAS3B-5'D7[+]	1052	5.5	0.0504098	0.912425	no	PPAN	TAS3B-5'D7[+]:PPAN	1
AT5G61920.2	TAS3B-5'D1[+]	779	6	0.151229	1	no	NA	TAS3B-5'D1[+]:AT5G61920.2	1
AT5G62000.4	TAS1B-3'D10[+]	3081	5	2.47008	0.465629	no	ARF1-BP	TAS1B-3'D10[+]:ARF1-BP	1
AT5G62020.1	TAS1C-3'D8[-]	928	5	0.0504098	0.634563	no	AT-HSFB2A	TAS1C-3'D8[-]:AT-HSFB2A	1
AT5G62390.1	TAS3B-5'D7[+]	854	4	0.10082	0.813693	no	ATBAG7	TAS3B-5'D7[+]:ATBAG7	1
AT5G62520.2	TAS2-3'D2[-]	1204	5.5	0.352869	0.870288	no	SRO5	TAS2-3'D2[-]:SRO5	1
AT5G63160.1	TAS3C-5'D8[-]	1027	6	0.453688	0.657825	no	BT1	TAS3C-5'D8[-]:BT1	1
AT5G63510.2	TAS1C-3'D5[+]	1039	6	0.0504098	0.874148	no	GAMMA CAL1	TAS1C-3'D5[+]:GAMMA CAL1	1
AT5G63870.3	TAS1C-3'D5[-]	947	5.5	0.0504098	0.954207	no	ATPP7	TAS1C-3'D5[-]:ATPP7	1
AT5G64260.1	TAS3C-5'D2[+]	330	5.5	0.554508	0.406625	no	EXL2	TAS3C-5'D2[+]:EXL2	1
AT5G64440.1	TAS3B-5'D4[+]	1020	6	0.10082	1.04799	no	AtFAAH	TAS3B-5'D4[+]:AtFAAH	1
AT5G65220.1	TAS3B-5'D9[+]	450	6	0.0504098	0.598133	no	NA	TAS3B-5'D9[+]:AT5G65220.1	1
AT5G65300.1	TAS4-3'D3[-]	242	5	0.201639	0.826614	no	NA	TAS4-3'D3[-]:AT5G65300.1	1
AT5G65620.1	TAS2-3'D5[+]	1820	5	0.10082	0.956213	no	NA	TAS2-3'D5[+]:AT5G65620.1	1
AT5G66050.2	TAS1C-3'D8[-]	1593	4.5	0.252049	0.892231	no	NA	TAS1C-3'D8[-]:AT5G66050.2	1
AT5G66210.4	TAS3C-5'D5[+]	1846	6	2.11721	0.314154	no	CPK28	TAS3C-5'D5[+]:CPK28	1
AT5G66290.1	TAS3C-5'D3[-]	750	5.5	0.151229	1.09598	no	NA	TAS3C-5'D3[-]:AT5G66290.1	1
AT5G66650.1	TAS1A-3'D9[-]	493	5.5	0.151229	1	no	NA	TAS1A-3'D9[-]:AT5G66650.1	1
AT5G66760.1	TAS1C-3'D5[-]	1777	6	0.0504098	0.874148	no	SDH1-1	TAS1C-3'D5[-]:SDH1-1	1
AT5G67030.2	TAS3B-5'D7[+]	353	5	0.10082	0.509773	no	ABA1	TAS3B-5'D7[+]:ABA1	1
AT5G67380.2	TAS3B-5'D3[-]	219	4.5	0.10082	0.813693	no	ATCKA1	TAS3B-5'D3[-]:ATCKA1	1
AT5G67410.1	TAS1A-3'D9[-]	816	6	0.10082	1.04799	no	NA	TAS1A-3'D9[-]:AT5G67410.1	1
AT5G67470.1	TAS3B-5'D3[-]	2718	6	0.0504098	0.838953	no	ATFH6	TAS3B-5'D3[-]:ATFH6	1
ATCG00830.1	TAS3B-5'D9[+]	771	4.5	1.51229	0.356395	no	RPL2.1	TAS3B-5'D9[+]:RPL2.1	1
ATMG00590.1	TAS4-3'D3[+]	811	5	0.327664	0.0112972	no	ORF313	TAS4-3'D3[+]:ORF313	1
ATMG00690.1	TAS1A-3'D3[-]	168	5	0.0504098	0.874148	no	ORF240A	TAS1A-3'D3[-]:ORF240A	1

[truncated: 4 more sheets: SRX1429179, SRX1559792, SRX1980216, SRX1980220]
