# Supplementary figures and images for: NanoPARE: parallel analysis of RNA 5′ ends from low-input RNA
Source: HighWire-hosted journal article supplement (doi:10.1101/gr.239202.118), 2018-10-24

**miRNA slice site RPTM + 1 (log10)**

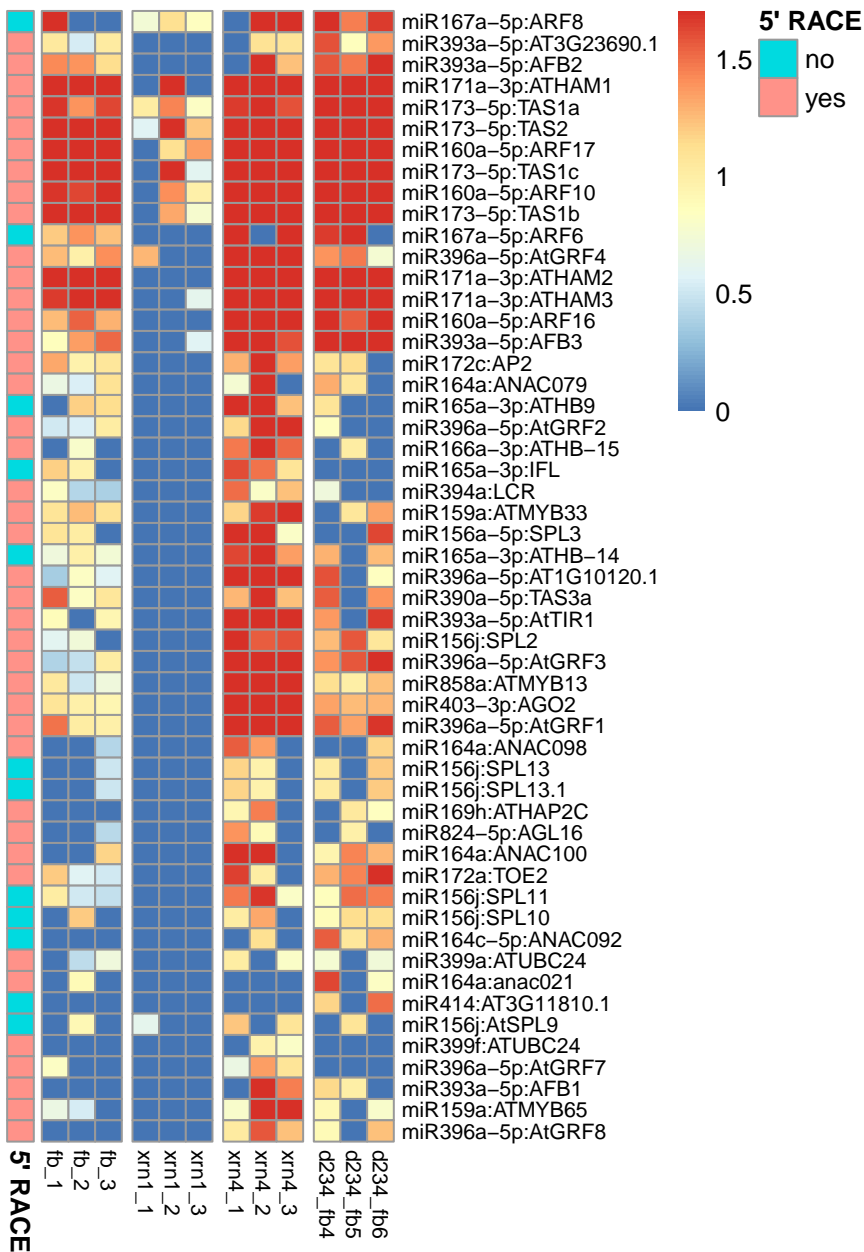

Supplement: Supplemental_Code_S1.zip [file fig.4g.miRNA.rpm.heatmap.pdf › supplemental_code_S1/analysis_pipeline/EndCut.figures/resources/figures/fig.4g.miRNA.rpm.heatmap.pdf]

**tasiRNA slice site RPTM + 1 (log10)**

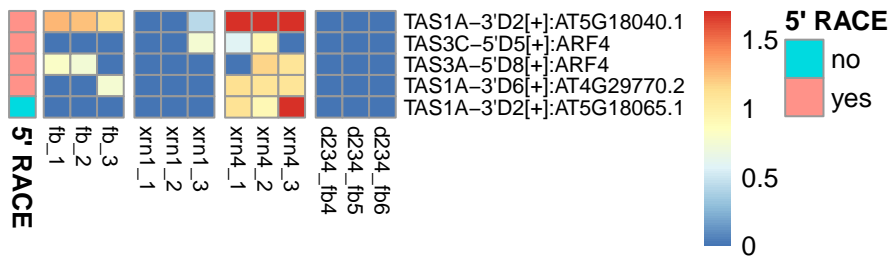

Supplement: Supplemental_Code_S1.zip [file fig.4g.tasiRNA.rpm.heatmap.pdf › supplemental_code_S1/analysis_pipeline/EndCut.figures/resources/figures/fig.4g.tasiRNA.rpm.heatmap.pdf]
